# Supplementary material for: Gut Microbiome Contributes to Liver Fibrosis Impact on T Cell Receptor Immune Repertoire
Source: Front Microbiol. 2020 Nov 27;11:571847. doi: 10.3389/fmicb.2020.571847 (PMC7729130; doi:10.3389/fmicb.2020.571847)
Supplement: Supplementary file 6 [file Table_6.XLSX]

## Sheet: CDR3 AA clonotypes
Saline group																				CCl4 group
Sample 1				Sample 2				Sample 3				Sample 4				Sample 5				Sample 1				Sample 2				Sample 3				Sample 4				Sample 5
CDR3 AA	Reads	Percentage(%)		CDR3 AA	Reads	Percentage(%)		CDR3 AA	Reads	Percentage(%)		CDR3 AA	Reads	Percentage(%)		CDR3 AA	Reads	Percentage(%)		CDR3 AA	Reads	Percentage(%)		CDR3 AA	Reads	Percentage(%)		CDR3 AA	Reads	Percentage(%)		CDR3 AA	Reads	Percentage(%)		CDR3 AA	Reads	Percentage(%)
CSAPGHFNSYNSPLYF	314568	4.26374		CSAGLGEQNTLYF	638966	8.35495		CASGETGGSTEVF	196284	2.80306		CSADANNERLF	999835	16.1261		CASSLKTNSNTEVF	556650	6.87389		CASSDVGYEQYF	1271171	19.6214		CASSPGDWGEQYF	978139	12.5879		CASSQSRDHYAEQF	566256	7.92579		CSAPHWGQDTQYF	1068291	13.495		CASSGLGGTEQF	1932277	24.6027
CASSLTGPSNTEVF	254444	3.44881		CASSDASQGYEQYF	458475	5.9949		CSAVRDSNTGQLYF	195899	2.79756		CASSDAGDSPLYF	710582	11.4608		CASSLDRANTEVF	302331	3.73339		CSADPFNSGNTLYF	150013	2.31555		CSAPGADAEQF	275783	3.54911		CAWSLGTGRDEQYF	219817	3.07674		CSETVSNERLF	1041738	13.1596		CASSLWYYEQYF	1006700	12.8178
CASSQDLTGASAETLYF	106922	1.44925		CSVGTGSSAETLYF	87915	1.14955		CSADQGRQNTLYF	166832	2.38247		CASSLDKSYEQYF	217055	3.50083		CSVGQGNSAETLYF	280534	3.46422		CSARTGNERLF	114220	1.76306		CSATGDEQYF	183627	2.36314		CSADNYEQYF	188940	2.64456		CASSLEGQQDTQYF	350812	4.43158		CSLTGVNQAPLF	453038	5.7683
CASSGGTGYEQYF	44661	0.605348		CASSQDPGVQDTQYF	51081	0.667922		CASGDASNERLF	127179	1.8162		CASSPDKTYEQYF	199701	3.22093		CSGDNSQNTLYF	258051	3.18659		CAWSLGGSAETLYF	104291	1.6098		CASGAAGGNQDTQYF	180302	2.32035		CSASRGQDTQYF	188708	2.64131		CASRRTGPNSDYTF	185623	2.34485		CSAGVNTLYF	342588	4.362
CSADRGANTGQLYF	29113	0.394606		CSAERGNTEVF	49666	0.649419		CSADRDSYNSPLYF	125668	1.79462		CASSPWDWGYAEQF	135026	2.1778		CASGDRADYTF	104963	1.29615		CASSDRPNSDYTF	69568	1.07383		CSGHTSQNTLYF	157994	2.03326		CASSTTPNSDYTF	184425	2.58137		CSARGGDTQYF	157696	1.99207		CSGTGRTSAETLYF	317352	4.04068
CSAWGGYEQYF	26130	0.354173		CSAGTASGNTLYF	45228	0.591389		CASGERQGNEQYF	117943	1.6843		CSADGRNTEVF	96969	1.56399		CAWSLTGGVYAEQF	99916	1.23383		CSAGQNNSPLYF	55522	0.857019		CSALRDRNTEVF	155934	2.00675		CASSGINQDTQYF	165793	2.32058		CASGDARNTGQLYF	131473	1.66081		CSGQNQDTQYF	264169	3.36353
CSGDWGQDTQYF	25891	0.350934		CSRDRYYAEQF	39563	0.517315		CSAAQGNTEVF	97202	1.38811		CSADRAGGAETLYF	83107	1.34041		CSAGTGVNQAPLF	96841	1.19586		CSALGVQDTQYF	53807	0.830547		CSADRATEVF	155743	2.00429		CASSLAGQLYF	164105	2.29695		CASSLRGRGTEVF	112525	1.42145		CSADEGSYNSPLYF	254978	3.2465
CASRDSSNERLF	25367	0.343831		CSPGQIIYEQYF	39559	0.517263		CSADLGRQNTLYF	71602	1.02252		CASSQDLSYNNQAPLF	54929	0.885937		CSADQEAPLF	90793	1.12117		CSAAGTANTEVF	51121	0.789087		CSGTANTEVF	149148	1.91942		CSSRGLFSNERLF	155181	2.17204		CASSPAGAETLYF	99075	1.25155		CSASRGQNTLYF	252541	3.21547
CSADGGARGQNTLYF	24624	0.333761		CASSLAHAETLYF	38808	0.507443		CSATKDTQYF	70026	1.00002		CSGVAEQF	39472	0.636635		CSAGHNNYAEQF	88786	1.09639		CSDRGPNTEVF	49588	0.765424		CSAGDNYEQYF	133311	1.71561		CRPGQNYAEQF	139080	1.94668		CASSPQGANSDYTF	86083	1.08743		CSARLGGPSAETLYF	210863	2.68481
CSARLGWEQYF	24298	0.329342		CSADPAETLYF	33566	0.4389		CSPGQSNTEVF	69459	0.991918		CSAVNQDTQYF	39216	0.632506		CASSDWDNSYEQYF	87673	1.08265		CSAPGTDANTEVF	49404	0.762584		CASSQGQDTGQLYF	128160	1.64932		CASSLRDWGTSAETLYF	126775	1.77445		CSADRADTEVF	83160	1.05051		CSAGQGANTGQLYF	204990	2.61003
CSARTGHSDYTF	23635	0.320355		CASSQTGGKVYEQYF	31999	0.41841		CSADPTDNSPLYF	64326	0.918616		CASSGTGYTEVF	38959	0.628361		CSASRDPGGDTQYF	87527	1.08084		CSASGGSAETLYF	44881	0.692768		CSADVGGLYAEQF	107104	1.37834		CSANSYNSPLYF	119466	1.67215		CASGADRVNYAEQF	82159	1.03786		CSARNQAPLF	194650	2.47838
CSAGPNNQAPLF	23560	0.319339		CSKLGASQNTLYF	29378	0.384139		CSARDWGDEQYF	54009	0.771283		CASNRGDTQYF	38866	0.626861		CASSDARGPSAETLYF	83714	1.03376		CSAPGGTSQNTLYF	42172	0.650953		CASSLRGDTEVF	106016	1.36434		CSAAGTGVAEQF	118291	1.6557		CSSRGGANTEVF	66854	0.844522		CASSQDGTANSDYTF	155589	1.98103
CSGTGGSYEQYF	23348	0.316465		CSAGQEVF	27979	0.365846		CASSDAQKDTEVF	47342	0.676074		CASSAGTGYERLF	35725	0.5762		CSINSGNTLYF	74579	0.920952		CASRTANSDYTF	41499	0.640565		CSADRANTGQLYF	105664	1.35981		CASSLRDREDEQYF	111322	1.55816		CASSGDLYEQYF	66471	0.839684		CASGDETGGVF	146418	1.86426
CSGQGANSDYTF	23295	0.315747		CASSQEGVGNTEVF	27285	0.356771		CSAGNQDTQYF	45906	0.655567		CASRSTGGYNYAEQF	33329	0.537556		CASGGGQGNYAEQF	72387	0.893884		CRRDINSDYTF	40872	0.630887		CSASGTGAEQF	104632	1.34653		CSAERYNSPLYF	110466	1.54617		CASSQGGLQDTQYF	65461	0.826925		CASSQEGVGGRRSAETLYF	137079	1.74536
CSADQGMEQYF	22904	0.310447		CASSLGQGDTGQLYF	26974	0.352705		CSADGLGGYAEQF	44756	0.639144		CASSLSHFSNERLF	32495	0.524104		CSADQSGGGTQYF	66609	0.822533		CASGDATGGASAETLYF	38870	0.599984		CSADGAEQF	102754	1.32236		CSALGGLAEQF	109463	1.53214		CASSLSWGVQNTLYF	61548	0.777495		CASSHIWGYEQYF	124302	1.58267
CSADDSSYEQYF	22353	0.302979		CASSLDRSSYEQYF	23991	0.3137		CSAGRAEQF	44246	0.631861		CSAEPISNERLF	30364	0.489734		CASSQGLGGRGAEQF	66411	0.820088		CASSLDLPGLGGYEQYF	35420	0.546731		CSADPVNTLYF	100320	1.29104		CSADASSYEQYF	109414	1.53145		CASGHYEQYF	60421	0.763258		CASGGRQSQNTLYF	113388	1.44371
CSADQGAGSAETLYF	22005	0.298262		CASSPGTAPDTQYF	22286	0.291406		CASSDVGYEQYF	43987	0.628162		CSADRLGVSQNTLYF	30051	0.484686		CASSGTSTEVF	65738	0.811778		CASGDPGQGAEVF	34195	0.527823		CSADARDTLYF	100227	1.28984		CSAVGDEQYF	105949	1.48295		CASSPDRDGNTLYF	59609	0.753001		CASSQQGAYNSPLYF	101482	1.29212
CSAVEQNTEVF	21972	0.297815		CSAGGNTEVF	20783	0.271753		CSADPETLYF	43695	0.623992		CASSFRDWGYAEQF	28554	0.460541		CASSQGGREQYF	65350	0.806986		CSADWGGAAEVF	33653	0.519457		CSADSGGNYAEQF	96851	1.2464		CRGTPYEQYF	103527	1.44905		CASSQGGTGVDTQYF	59509	0.751738		CASGDTNSDYTF	92253	1.17461
CSAAAGGFNQDTQYF	21950	0.297517		CASSLTGTQDTQYF	19491	0.254859		CASGQGRDTEVF	43225	0.61728		CSADTQGFNERLF	28491	0.459525		CSADGDRAPAETLYF	59728	0.737562		CSAGPDTEVF	31300	0.483136		CASRPLGGYAEQF	88603	1.14025		CSAEWGQAPLF	102346	1.43252		CSADWGAYEQYF	59494	0.751548		CASSQQDTQYF	84474	1.07556
CASGGTAYEQYF	21809	0.295605		CSAAGGYAEQF	19412	0.253826		CSAAGGDTEVF	43055	0.614853		CASSLGTTNSDYTF	27295	0.440235		CSAEGLGGSQNTLYF	59343	0.732808		CASSLGDIFSNERLF	31262	0.48255		CSADPEGETEVF	88545	1.13951		CRDNYEQYF	102118	1.42933		CSAVWGDEQYF	58183	0.734987		CASSPTASNERLF	76874	0.978797
CSGTGNYAEQF	21250	0.288029		CASSFRQGYAEQF	19360	0.253146		CSAGASQDTQYF	42013	0.599972		CASGTGAEQF	25699	0.414493		CSADEGNYAEQF	56450	0.697083		CSAGQGQDTQYF	29840	0.4606		CSGTGGNTEVF	88014	1.13267		CRLGGETLYF	100879	1.41199		CSADWGGAAETLYF	57466	0.72593		CASSDARDRDEQYF	66587	0.847818
CASGPTGGNQDTQYF	20781	0.281672		CSKDAEQF	18831	0.246229		CSADINTEVF	41235	0.588862		CAGHQNTLYF	25537	0.41188		CASSLVGTDTEVF	56191	0.693885		CSAEGGGFGNTLYF	29506	0.455445		CSSTGTGGGQNTLYF	86504	1.11324		CSDRFSNERLF	100351	1.4046		CSADPGHNTLYF	57006	0.720119		CASGHRASAETLYF	60375	0.768724
CSADLRYNSPLYF	19989	0.270937		CASSLGNERLF	18735	0.244974		CSANRADEQYF	39846	0.569026		CASSRDKTYEQYF	25491	0.411138		CSARDSNYAEQF	55776	0.68876		CSARDTQYF	28860	0.445473		CAWSLRDNTGQLYF	86503	1.11323		CASSQSGDNNQDTQYF	99357	1.39068		CSADTGGNSPLYF	56929	0.719146		CASGGPQGSNTEVF	58747	0.747995
CSASGQENTEVF	19579	0.265379		CSAAWGQDTQYF	18489	0.241757		CASSDQSYAEQF	38463	0.549276		CSERDWGHQDTQYF	24521	0.395494		CSAEGGGEQYF	55568	0.686191		CSADWGADTGQLYF	28838	0.445134		CSGGTGGPGQLYF	86166	1.10889		CSADQYNAETLYF	98508	1.3788		CSAGDRGAETLYF	55920	0.7064		CASSQGGGRSYEQYF	55956	0.712459
CASSLGQNTLYF	19116	0.259104		CASRKGDQDTQYF	17629	0.230512		CSAEGGGPSAETLYF	38366	0.547891		CASGDAGGVQYF	23519	0.379333		CASGEGTGQDTQYF	55437	0.684574		CSADWGASEQYF	28612	0.441645		CSAGRDISYNSPLYF	86148	1.10866		CSAARETYAEQF	97649	1.36678		CASSDMDGYEQYF	55833	0.705301		CASSQDTGGYAEQF	54070	0.688445
CASSAQGADAEQF	18745	0.254075		CASSLEDRANSDYTF	17586	0.22995		CSAGQYNSPLYF	37860	0.540665		CASSDEGDEQYF	23185	0.373946		CSAEGQDTQYF	53375	0.659111		CSAWGQDTQYF	28575	0.441074		CSATVNTEVF	85125	1.09549		CAWSLGTGDDTQYF	97075	1.35874		CSAERQGTGQLYF	53471	0.675464		CTSSQGGGRSYEQYF	52040	0.662598
CASSPDSGTGQLYF	18696	0.253411		CASSQDWGDTQYF	17376	0.227204		CSAGDTEVF	37805	0.539879		CASSLGANYAEQF	22929	0.369817		CASSLLGQGGEQYF	53342	0.658703		CSADRDWGAWLAEQF	28419	0.438666		CSATGDSAETLYF	84513	1.08762		CSAEGAPLF	96683	1.35326		CSADWGASTEVF	51972	0.656528		CASSWDSYAEQF	50217	0.639387
CSADGTGKVF	18298	0.248016		CASSPRDSYAEQF	17159	0.224366		CSAGDRFYGNTLYF	36188	0.516787		CASSPGGNSDYTF	22710	0.366284		CSNPTGGPNQDTQYF	52981	0.654245		CSADRDNYAEQF	28152	0.434545		CASSQDPAGGHAEQF	84430	1.08655		CSADPAANTEVF	96512	1.35086		CSADREQYF	51311	0.648178		CASGDATGGYAEQF	48868	0.622211
CSADANTEVF	17682	0.239667		CSGRNYEQYF	17117	0.223817		CSADLGDQDTQYF	35020	0.500108		CSAGQTGGAYEQYF	21844	0.352317		CSADLGGNEQYF	52846	0.652578		CSAGGTNTGQLYF	27881	0.430362		CSAVSQNTLYF	84286	1.0847		CSADQGAETLYF	95089	1.33094		CASSDAGTGDAEQF	50797	0.641685		CASSRTINQDTQYF	47497	0.604755
CSAVGTVEQYF	17067	0.231331		CASGDGGRRAETLYF	17030	0.22268		CSGDRISNERLF	34415	0.491468		CSEQGRDTEVF	21689	0.349817		CSAPGGYEQYF	52245	0.645157		CSAELSANTEVF	27730	0.428031		CSPYREGEVF	84167	1.08316		CSAVAGGHERLF	95087	1.33092		CSAPGGRNTGQLYF	50103	0.632918		CASSHPGTEVF	47433	0.60394
CASSFNQDTQYF	16449	0.222954		CSAEDGSSYEQYF	16952	0.22166		CASSPGTSSAETLYF	33454	0.477744		CSADHGGTEVF	21121	0.340656		CSAGQYNSPLYF	52238	0.64507		CSAGGQKNERLF	26922	0.415559		CSAEALNQDTQYF	80814	1.04001		CASSTRSQNTLYF	92809	1.29903		CASSLGHSGNTLYF	47960	0.605847		CASRGISYEQYF	46963	0.597956
CASSQGQGAYEQYF	16267	0.220488		CSAGANSDYTF	16414	0.214625		CSAGREVF	33183	0.473874		CSADRPSAETLYF	20610	0.332414		CSADRGAAPLF	52032	0.642527		CSVRDWGAETLYF	26812	0.413861		CSDRQGNTEVF	80652	1.03793		CSADFGRNTGQLYF	84975	1.18938		CASSDGFTLYF	47807	0.603914		CASSQDGGEVF	45240	0.576018
CARWDNSPLYF	16138	0.218739		CAWRLQNTEVF	16269	0.212729		CASSQDGGDTEVF	31381	0.44814		CSAEGWGGYEQYF	20391	0.328882		CSATGINQAPLF	51796	0.639612		CSGTGF	26592	0.410465		CSADYNSYNSPLYF	80077	1.03053		CASGALGGRGEQYF	83951	1.17505		CASSLLGQGYAEQF	47789	0.603687		CASSGTGVNSDYTF	40113	0.510738
CASSHRLGENYAEQF	15794	0.214076		CASSRDSSGNTLYF	16258	0.212585		CSAGQTSAETLYF	28897	0.412667		CSADQDWGGWQNTLYF	20212	0.325995		CSADRFSYEQYF	50093	0.618582		CSEPGLGGDYAEQF	26391	0.407363		CSGPGQANTEVF	78979	1.0164		CAWSHWGNYAEQF	83515	1.16895		CSADIWGGGDTQYF	47712	0.602714		CASGDRGTENTEVF	36423	0.463755
CSADPQGALEQYF	15585	0.211243		CSADDGQANTEVF	16219	0.212075		CASSPDWGNAEQF	28683	0.409611		CAWTWGVNYAEQF	20202	0.325833		CSATGVGGNTLYF	49855	0.615643		CSADSQNTLYF	26391	0.407363		CSAYRGPNSDYTF	78110	1.00521		CSTGPDYTF	83295	1.16587		CASSLDRGDSGNTLYF	47682	0.602335		CASSPGTGDYNNQAPLF	32937	0.41937
CASSRQGADERLF	15265	0.206906		CASSSSGVYAEQF	16102	0.210545		CASGDGGGQDTQYF	28201	0.402728		CASSATSAETLYF	20048	0.32335		CSATGGAYEQYF	49577	0.612211		CSADRANTEVF	26306	0.406051		CSGGTKNTLYF	78101	1.0051		CSGGQTNTEVF	82771	1.15853		CSAAQGHSGNTLYF	46780	0.590941		CASRSGQEGTEVF	30042	0.382509
CSAANYEQYF	15208	0.206134		CSAETETLYF	15889	0.20776		CASRQANTGQLYF	28036	0.400372		CSADRGGITEVF	19484	0.314253		CASSDRDQDTQYF	49099	0.606308		CSAPGLGASAETLYF	26175	0.404029		CASSQDLANTEVF	75819	0.975731		CSGLGGGDTQYF	82294	1.15186		CSAPGGANTGQLYF	46366	0.585711		CASSFPTGGSYEQYF	22596	0.287703
CASSHWGREQYF	14942	0.202528		CASSPGLGYEQYF	14937	0.195312		CASGMEGGREQYF	27964	0.399344		CSASGNEQYF	19449	0.313688		CSAPTGGGGAETLYF	48670	0.60101		CSADLGSAETLYF	26139	0.403473		CSAEGANQDTQYF	74599	0.960031		CSGDREVF	80033	1.12021		CASSDDWGGEEQYF	45876	0.579521		CASSDALNSDYTF	22369	0.284813
CSAETGGSAETLYF	14775	0.200265		CASSWGQGGSAETLYF	14554	0.190304		CASSQDQRGEQYF	27881	0.398158		CSAEGGEVF	19325	0.311688		CSARGTEVF	48520	0.599158		CSALGDNYAEQF	25906	0.399876		CASSLPGRDNQAQHF	74425	0.957792		CASGAWTGQNTLYF	79415	1.11156		CSAGANTEVF	45749	0.577917		CASTSQGSDTEVF	22106	0.281464
CSAEGLGASQNTLYF	14685	0.199045		CASSQDPGAETLYF	14428	0.188657		CASSQDWASAETLYF	27044	0.386205		CSVDIANTEVF	19273	0.31085		CSAARGGYF	46850	0.578536		CSAGDSQNTLYF	25240	0.389596		CSADWGSYEQYF	72869	0.937767		CASSPGTGNTEVF	76582	1.07191		CSAGTGNTEVF	45495	0.574708		CASSLVGGALEQYF	21825	0.277886
CSAGGRAEQF	14591	0.197771		CNPGQGWEQYF	14203	0.185715		CSDPGGADQDTQYF	25705	0.367084		CSGDRSYEQYF	19043	0.30714		CSLRGWDTQYF	46627	0.575782		CSADRDGQNTLYF	25178	0.388639		CLAGGYAEQF	72678	0.935309		CASSEGQANTGQLYF	75354	1.05472		CRTGGQDTQYF	45404	0.573559		CSGTGRSSAETLYF	21431	0.27287
CSADWGLDTQYF	14557	0.19731		CSADGTLNQDTQYF	14186	0.185492		CSADPTKTSQNTLYF	25076	0.358101		CSAEGWGYLYF	19009	0.306592		CASSQDGGVQDTQYF	46296	0.571695		CSAGTNTEVF	25094	0.387343		CASSPDSSYEQYF	72241	0.929685		CASSESGGGQNTLYF	72191	1.01045		CSAGDWGDTQYF	45210	0.571108		CASRDREVF	21223	0.270222
CSAGQLHNSPLYF	14417	0.195412		CSADYEQYF	14168	0.185257		CASSQGLGVSYEQYF	24831	0.354602		CRLRDRGDSDYTF	18153	0.292786		CSSTAAFSNERLF	46292	0.571645		CSGTGGPSAETLYF	25059	0.386802		CSASGGYNQAQHF	71512	0.920304		CSADQGHTGQLYF	70081	0.980912		CASSTWGPQNTLYF	44976	0.568152		CASSPSGTTNTEVF	19710	0.250957
CASSLGLGSLYAEQF	14227	0.192837		CSGQGNQDTQYF	14091	0.18425		CASSEGQRNTEVF	24643	0.351918		CSAPGTDGTEVF	18053	0.291173		CSAGQRNSPLYF	46003	0.568076		CSGLGGPQNTLYF	25011	0.386061		CSKRDWGGETLYF	71113	0.915169		CASSHRDWATGQLYF	66570	0.931769		CAWSRGARDTQYF	43839	0.553789		CASSLSDFNYAEQF	17768	0.226231
CSAGGQDTQYF	14192	0.192362		CSAGGGDQAQHF	13985	0.182864		CSAEGEKSQNTLYF	24642	0.351903		CSGDKNTEVF	18006	0.290415		CSAVDRGLDTQYF	45349	0.56		CASRIRGLSNERLF	25007	0.386		CASSGDTQAQHF	69689	0.896843		CASSGQGAEVF	62385	0.873192		CSAVAGGASAETLYF	43703	0.552071		CASSFYTGNTLYF	14915	0.189905
CSADLGGRLDTQYF	14185	0.192267		CASSLLQGYAEQF	13981	0.182812		CSAGGWQYF	24132	0.34462		CSDWGYYAEQF	17854	0.287963		CSAGGQGYEQYF	45348	0.559988		CSAVRDSQNTLYF	24303	0.375133		CSARYNSPLYF	69293	0.891747		CASSALQGWAETLYF	59752	0.836339		CASRGQSQNTLYF	43564	0.550315		CASSPGTGDYNNQAPPF	14162	0.180317
CSADSGTISNERLF	14169	0.192051		CASGDALGGHAEQF	13909	0.18187		CSADRGGGYEQYF	23894	0.341221		CASSRTGVQDTQYF	17824	0.287479		CSADGANTEVF	45144	0.557469		CSAVSNSDYTF	24247	0.374269		CAWSRAGANSGNTLYF	64337	0.827967		CASSQSPGTVYEQYF	59376	0.831076		CASSLDRGANTGQLYF	43451	0.548888		CSAGQGANTGQLHF	13539	0.172385
CSEDGGGQNTLYF	14056	0.190519		CSAVRVGDTQYF	13888	0.181596		CSALGVDTQYF	23866	0.340822		CASSLQYAEQF	17711	0.285657		CASSPRGRQNTLYF	44456	0.548973		CSAGGLYEQYF	23921	0.369237		CAWRRTFNNQAQHF	64180	0.825947		CSAGTVYAEQF	58977	0.825491		CASSDGGNYAEQF	42718	0.539628		CASSGLGGTEQLF	9579	0.121964
CSEDFSQNTLYF	13858	0.187835		CSAETESQNTLYF	13827	0.180798		CSAGGLGQDTQYF	23703	0.338494		CSADGGAASDYTF	17664	0.284899		CKPGLGDAEQF	44392	0.548183		CSATNTEVF	23768	0.366875		CSTRQGANTEVF	63962	0.823141		CSPRQFSNERLF	57726	0.807981		CASSPSNTEVF	42492	0.536773		CSAPRGQNTLYF	9466	0.120526
CSARDNYAEQF	13689	0.185545		CASSPGQGNYAEQF	13711	0.179281		CASSQDGTANSDYTF	23422	0.334481		CSAQGGYNSPLYF	17347	0.279786		CSAVANTGQLYF	44044	0.543885		CSANDNPF	23635	0.364822		CSAAGGAGNSPLYF	61450	0.790814		CASSHPGQGSNERLF	57677	0.807295		CSAGRNSPLYF	42020	0.530811		CASRSGQEGTKVF	8768	0.111638
CSADDWGGDEQYF	13676	0.185368		CSAAGGAKETLYF	13614	0.178013		CSAGLGGREQYF	23327	0.333124		CASSLDWAGSYEQYF	17323	0.279399		CSADTYEQYF	44039	0.543824		CSAAGASYEQYF	23615	0.364513		CSAGGDSPLYF	61428	0.79053		CASSQDADWAYAEQF	55544	0.77744		CASSRQGPSQNTLYF	41749	0.527387		CASSGLGGAEQF	7651	0.0974162
CSAGFSNERLF	13675	0.185355		CASSFSGGAREQYF	13579	0.177555		CSGTGGARDTQYF	23320	0.333024		CASSPGGGSEQYF	16923	0.272947		CSASGGEQYF	43608	0.538501		CSETGGQDTQYF	23434	0.361719		CSADRQGRNSPLYF	60081	0.773196		CASSQDWTGIDTQYF	52963	0.741314		CASSLRDNYAEQF	41073	0.518848		CASGGLGGTEQF	6981	0.0888855
CASTGQLNTGQLYF	13674	0.185341		CASSDRGPNQDTQYF	13570	0.177438		CAWSLPRGSNTGQLYF	23143	0.330497		CSADYTEVF	16740	0.269996		CMALSNERLF	43226	0.533784		CSAEPVYEQYF	23395	0.361117		CSAGVPEVF	50891	0.654927		CASSQSGTQREYF	48109	0.673374		CSADSSGNTLYF	40062	0.506077		CAGSGLGGTEQF	6659	0.0847856
CSAGLGGRNQDTQYF	13490	0.182847		CASSDVQGANTGQLYF	13375	0.174888		CASGPGQGATEVF	23009	0.328583		CASGERQFSQNTLYF	16739	0.269979		CASSRDYAEQF	42833	0.528931		CSGTGGGYAEQF	23232	0.358601		CASRGSSYEQYF	49784	0.640681		CASSQDRLGGSQNTLYF	47008	0.657963		CASSLSQTEQF	39995	0.50523		CASSGLGGTEQSF	6530	0.0831431
CSAEEGSETLYF	13363	0.181126		CSGLEDTQYF	13347	0.174522		CSAGTGTGQLYF	22958	0.327855		CASSQDWGPQDTQYF	16630	0.268221		CSSSRNNQDTQYF	42783	0.528314		CSGQGRNSPLYF	23173	0.357691		CSAEREENSPLYF	46226	0.594893		CASGGPGQGAEQF	46011	0.644008		CASSQEEYYAEQF	39849	0.503386		CASRQHYAEQF	6036	0.0768533
CASSLGTGDDNQAPLF	13267	0.179825		CSAEQFNERLF	13332	0.174326		CSADWGDTGQLYF	22799	0.325584		CSAVGGKYEQYF	16603	0.267786		CSADRGQNTLYF	42536	0.525263		CSADAENTLYF	23135	0.357104		CASSPGTGINEQYF	45979	0.591714		CASSPVAEQF	44653	0.625001		CASSQDTINTGQLYF	39779	0.502502		CASSGTTNTGQLYF	5862	0.0746378
CASSLEGNERLF	13221	0.179201		CASSQDPGAGTEVF	13147	0.171907		CASGDQLGGSAETLYF	22784	0.32537		CSAVGQGAGNTLYF	16408	0.264641		CSPGLGGQDTQYF	41950	0.518027		CSAGGASAETLYF	22884	0.35323		CASSPRGDTGQLYF	44176	0.568511		CASSPGQNNSPLYF	44212	0.618828		CASGPTTNTGQLYF	39527	0.499318		CASSLWYYGQYF	4336	0.0552081
CSAAGTASAETLYF	13105	0.177629		CSADRDKYNERLF	13103	0.171331		CASGDGTGGAEQF	22661	0.323613		CASSWTGGHQDTQYF	16354	0.26377		CASSFRTNSDYTF	41221	0.509025		CSAGTNTGQLYF	22823	0.352288		CASSQDRGSSYEQYF	43969	0.565847		CSETGPQDTQYF	44026	0.616225		CASSDTNSDYTF	38744	0.489427		CASSGLGGTERF	4001	0.0509427
CSADRANSPLYF	13005	0.176273		CSAGLGSSAETLYF	13058	0.170743		CASSQGDSDYTF	22530	0.321743		CAWSLGQGAGAETLYF	15964	0.25748		CSADRNTEVF	40794	0.503752		CASGPGLGASQNTLYF	22789	0.351763		CASRGLGGDEQYF	41868	0.538808		CASSQARGAEQF	43695	0.611592		CASSPGGTQYF	38215	0.482745		CASPLWYYEQYF	3875	0.0493384
CSADRGANQAPLF	12834	0.173956		CSGSYEQYF	13037	0.170468		CASSQGQGANTEVF	22511	0.321471		CSADEGQGAGNTLYF	15896	0.256383		CSFSGTGSYEQYF	40194	0.496343		CSADPKNTEVF	22651	0.349633		CASSQEQGNSYEQYF	39452	0.507716		CSAELNERLF	42325	0.592416		CASSEPGQSNERLF	37472	0.473359		CSARLGGPSAETPYF	3793	0.0482943
CSAGGNSDYTF	12817	0.173725		CSAGQGRENTLYF	12965	0.169527		CSAAGNSPLYF	22505	0.321386		CASSRLGGEQYF	15833	0.255367		CSVGQNTGQLYF	39995	0.493885		CSAERVEEVF	22138	0.341715		CASSQGQQATQYF	39121	0.503457		CASSQERNSNERLF	40305	0.564142		CASSQGQGQVF	37187	0.469759		CASSGPGGTEQF	3443	0.0438379
CSAENSQNTLYF	12803	0.173535		CSAVPLNSDYTF	12758	0.16682		CSAQGSTGQLYF	22092	0.315488		CSAEQEQYF	15648	0.252383		CRVSGGVTEVF	39662	0.489773		CSAATGGFSNERLF	22055	0.340434		CSARGGSSETLYF	39072	0.502826		CASARDNYAEQF	39702	0.555702		CASRTLNQDTQYF	36954	0.466815		CASSPWYYEQYF	3059	0.0389487
CSADDINTLYF	12786	0.173305		CASRGHSSYEQYF	12625	0.165081		CSDWGGAQDTQYF	22029	0.314588		CASSCGRESNYAEQF	15324	0.247157		CSAEGATEVF	39455	0.487217		CSVGQGGSNERLF	22017	0.339847		CASSPTNAEQF	38630	0.497138		CASSQARSQNTLYF	39194	0.548592		CASGDGANTEVF	36952	0.46679		CSGLGGTEQF	2756	0.0350907
CSADSGENTLYF	12780	0.173224		CSADRASQNTLYF	12541	0.163983		CSAGGQANTEVF	21907	0.312846		CSGSQNTLYF	15283	0.246496		CASSQGQGDTEVF	39418	0.48676		CSAEAYEQYF	21978	0.339245		CASSQDGSPYAEQF	37315	0.480215		CASSHLRGAYTEVF	39003	0.545918		CASSLGDREVF	36076	0.455724		CASGDPGQGNSGNTLYF	2749	0.0350016
CSERTGSAETLYF	12750	0.172817		CSAEDRGGEQYF	12529	0.163826		CSGGQGAYEQYF	21887	0.31256		CASSDAQ_CVASFTLQSSYEQYF	15213	0.245367		CASSPGTGGYEQYF	38912	0.480512		CSAGGENEQYF	21882	0.337763		CASRGQNYAEQF	37205	0.478799		CASSWDRVYEQYF	38983	0.545638		CASSGTGGALEQYF	35510	0.448574		CASSLRYYEQYF	2692	0.0342758
CSGDWGEQYF	12734	0.1726		CSETLF	12434	0.162584		CSGGGAGEQYF	21852	0.31206		CASSPRGISGNTLYF	15048	0.242706		CASSQGQTNSDYTF	38780	0.478882		CSATGPNERLF	21847	0.337223		CASSQGQAQYF	36833	0.474012		CASSQRQGAEQF	38558	0.53969		CASSPDRVEQYF	35076	0.443092		CAGSLWYYEQYF	2660	0.0338684
CSAAVANTEVF	12726	0.172492		CASTAGGDEQYF	12394	0.162061		CSADGTIEQYF	21571	0.308047		CASSDAQNTEVF	14850	0.239512		CSAVGDQDTQYF	38155	0.471164		CSADRNSGNTLYF	21794	0.336405		CASSQGHANTGQLYF	36432	0.468851		CASSLTGVISNERLF	37675	0.527331		CASSLEDSQNTLYF	34981	0.441892		CASSGLGGTE_F	2489	0.0316912
CASSLLGGYEQYF	12725	0.172478		CASSSGTGYAEQF	11715	0.153182		CASSQAVNQDTQYF	21558	0.307862		CASSDYRTNTEVF	14779	0.238367		CSAAQNTEVF	37815	0.466965		CSAERGQGTTEVF	21733	0.335463		CASSQDLSQNTLYF	35910	0.462134		CASSQESSAETLYF	34933	0.488951		CSAEGQQAQHF	34717	0.438557		CVSSGLGGTEQF	2390	0.0304306
CASSPGPSQNTLYF	12714	0.172329		CSVRSSAETLYF	11651	0.152345		CSAGGGDTEVF	21524	0.307376		CASSSSNERLF	14463	0.23327		CQGTENTEVF	37678	0.465274		CSATGNTLYF	21636	0.333966		CASSQGTGAETLYF	34596	0.445224		CASSLIGTNSDYTF	34520	0.483171		CSAVGTNSDYTF	34415	0.434742		CASRPGQEGTEVF	2385	0.030367
CASSDISAETLYF	12667	0.171692		CASSLNWVNTGQLYF	11606	0.151757		CSGGLSYEQYF	21220	0.303035		CASSLLGYTGQLYF	14205	0.229109		CSGQGARATEVF	37461	0.462594		CSADWGEVAETLYF	21380	0.330015		CASSQDWEEDTQYF	32874	0.423063		CASSGGQGANSPLYF	34052	0.47662		CASGDGWGANTGQLYF	34347	0.433883		CASSGLGETEQF	2211	0.0281515
CSAVDWGDPETLYF	12654	0.171516		CASSLGGQDTQYF	11500	0.150371		CSARDWGF	21196	0.302692		CASSPTNQDTQYF	13931	0.22469		CSVGSSAETLYF	37294	0.460532		CSAAPNTEVF	21315	0.329011		CASSQDPGGSTQYF	32509	0.418365		CASSQDQNTEVF	28906	0.404592		CASSDTGGSLYF	34183	0.431811		CASSGLRGTEQF	2124	0.0270438
CASSPDGQNTLYF	12538	0.169944		CASGDQNTLYF	11446	0.149665		CSAEYAEQF	21013	0.300079		CSAEDIYNSPLYF	13868	0.223674		CSADTGAEQF	37204	0.45942		CSGDSPYAEQF	21215	0.327468		CASSQDLAGYEQYF	31689	0.407813		CASSQDEGYEQYF	28759	0.402535		CAWSLGAFSNERLF	32451	0.409932		CTSSGLGGTEQF	2087	0.0265727
CSADTQNTLYF	12450	0.168751		CASSLEGWGSAETLYF	11401	0.149076		CSAGDNTEVF	20837	0.297565		CASSQKDSNERLF	13829	0.223045		CTSTLGGGTGQLYF	36671	0.452838		CSAGWGGANTGQLYF	20818	0.32134		CASSPGLGGPAEQF	31623	0.406963		CASSHTTNSDYTF	27804	0.389168		CASSPYWGNYAEQF	31515	0.398108		CSLTGVNQAPPF	2068	0.0263308
CRDWGDEQYF	12426	0.168426		CASSNRGRHERLF	11393	0.148972		CSAKGQGDEQYF	20797	0.296994		CASGEGTGGYEQYF	13727	0.2214		CASSGQGHSYEQYF	36503	0.450764		CSGDGYEQYF	20649	0.318731		CASSPSGNYEQYF	31541	0.405908		CASGDATFSNERLF	26170	0.366297		CASSGLGGTEQF	29064	0.367146		CASSLWYYERYF	2065	0.0262926
CASSLGTGGTQYF	12425	0.168412		CASGGLGSQNTLYF	11390	0.148933		CSDWGGQNTLYF	20717	0.295852		CSPHRGWAEQF	13570	0.218867		CRGPDYTF	36373	0.449159		CSRGTFNTEVF	20577	0.31762		CASSQDRGDQDTQYF	30289	0.389796		CASSLQGRDTEVF	21601	0.302346		CASSPRTGGLF	28382	0.358531		CASSGLGRTEQF	2043	0.0260125
CSAGLEDTQYF	12413	0.168249		CASSDISNSDYTF	11254	0.147154		CSAASLGGRDTQYF	20628	0.294581		CASSLRGTGNTLYF	13446	0.216867		CASSLDRIYAEQF	36175	0.446714		CASGDGLGGAETLYF	20271	0.312896		CASSRLAGEDTQYF	29871	0.384416		CASSDWDKEVF	17832	0.249592		CASSLEDANTEVF	28202	0.356257		CASSGLEGTEQF	1990	0.0253376
CSADVLGEYEQYF	12411	0.168222		CASSLWGSSYEQYF	11098	0.145114		CASSDLGGEQYF	20612	0.294352		CASSLGSYEQYF	13377	0.215755		CASSGGGNYAEQF	35502	0.438403		CSAPSGTNYAEQF	20117	0.310519		CASSQEGQGEQYF	29360	0.37784		CASSLEGFNERLF	14542	0.203542		CASSHQGPQDTQYF	27693	0.349827		CASSRLGGTEQF	1979	0.0251976
CASRGQGEQYF	12396	0.168019		CASGQGNTEVF	11059	0.144605		CSADRGGYEQYF	20432	0.291782		CASGEDNANSDYTF	13366	0.215577		CSAGDSQNTLYF	35240	0.435168		CSSRKDTQYF	19933	0.307679		CASSQARGRSPLYF	29217	0.376		CARGEISNERLF	12940	0.181119		CASSQEDWGYEQYF	27487	0.347225		CANSGLGGTEQF	1943	0.0247392
CSANREAPLYF	12392	0.167965		CASGDMTGGNYAEQF	11012	0.14399		CSRRGYAEQF	20382	0.291068		CASGDEQYF	13349	0.215303		CASSLRANSDYTF	35197	0.434637		CSAGQGPNERLF	19888	0.306985		CASSQDWGAPNTGQLYF	28773	0.370286		CASSLADNYAEQF	12477	0.174638		CASRQTGSETLYF	27465	0.346947		CASSLWCYEQYF	1921	0.0244591
CSAETSSAETLYF	12390	0.167938		CSGTYNSPLYF	10928	0.142892		CSARLGTSQNTLYF	20326	0.290268		CASGASGTKDTQYF	13262	0.2139		CASSPGTNSYNSPLYF	34662	0.42803		CSSGTGGARYAEQF	19824	0.305997		CASSPGTGYYEQYF	28723	0.369643		CASSFGVGNTLYF	12408	0.173673		CASSQGPVANTEVF	27363	0.345659		CSGQNRDTQYF	1859	0.0236697
CSAEQGRNTLYF	12364	0.167585		CASGFRDWGGNYAEQF	10911	0.142669		CSAGQYTGQLYF	20295	0.289825		CASSDGTTSAETLYF	13219	0.213206		CSASQSNYAEQF	34539	0.426511		CSAAGTKFSNERLF	19741	0.304716		CSAGKAGNTLYF	27575	0.354869		CASSPGLSAETLYF	11153	0.156107		CASSPGQGAYEQYF	26653	0.33669		CASNGLGGTEQF	1846	0.0235042
CSAREANERLF	12361	0.167544		CASSLAQGWAEQF	10902	0.142552		CSAGTSNTGQLYF	20146	0.287698		CASSAGNYAEQF	13159	0.212238		CSAVGDNQAPLF	34299	0.423547		CRQGTYEQYF	19590	0.302385		CASSPQGDPNERLF	26998	0.347443		CASSLEDGGAQDTQYF	10390	0.145427		CASSLGDRNYAEQF	26408	0.333595		CSGQNQDTRYF	1840	0.0234278
CSADMGGRGQNTLYF	12342	0.167287		CSADIANTEVF	10771	0.140839		CSSRRGLGEDTQYF	19973	0.285227		CSADANNKRLF	13093	0.211174		CASSLNRDTQYF	33912	0.418768		CASSLLGNQDTQYF	19441	0.300085		CAWSEGEQYF	26858	0.345641		CASSQDWGARSYEQYF	9980	0.139688		CASSQAGGWEQYF	26276	0.331927		CSPTGVNQAPLF	1765	0.0224728
CSADQGRGAEQF	12288	0.166555		CASGGQGKQDTQYF	10744	0.140486		CSAGDERLF	19803	0.282799		CASSLGLGGYQDTQYF	13037	0.210271		CASSPGLFYEQYF	33686	0.415978		CASSQETGRQDTQYF	19244	0.297044		CASSSRLGNYAEQF	23864	0.307111		CASSLVEGDNSPLYF	8278	0.115866		CASSPRTGGSYEQYF	26026	0.328769		CASSGLGGTEQCF	1762	0.0224346
CASSSGTNAEQF	12222	0.16566		CASSLSGTNTEVF	10718	0.140146		CSADRAGGDERLF	19753	0.282085		CASSAGTKNTLYF	12804	0.206513		CSADRTGGSEQYF	33580	0.414669		CASSQGTSNTEVF	19148	0.295562		CASSQSGNAEQF	23666	0.304563		CSADPAANTVVF	6373	0.0892018		CASSQESRVQDTQYF	25762	0.325434		CASSLWHYEQYF	1627	0.0207158
CSVGFANTEVF	12131	0.164427		CASSLAGDAEQF	10516	0.137504		CASSQALTGQLYF	19578	0.279586		CASSLDRAEQF	12755	0.205722		CSADNRGQNTLYF	32904	0.406321		CSADAQPNSDYTF	18838	0.290777		CASSQTANTEVF	23493	0.302337		CASSRGGQDTQYF	4894	0.0685005		CASSQDTGGNQDTQYF	25313	0.319762		CVSSLWYYEQYF	1621	0.0206394
CSADGGQDTEVF	12075	0.163668		CSARTGGDTQYF	10498	0.137269		CSADWGSYEQYF	19505	0.278544		CASSFGSGGQNTLYF	12460	0.200964		CSADHWNSGNTLYF	32759	0.40453		CSGGRNTEVF	18771	0.289743		CASSQGQGTSDYTF	23432	0.301552		CSSVSAETLYF	4255	0.0595565		CASSDSLGGDTQYF	25262	0.319118		CTRSLTGVNQAPLF	1530	0.0194807
CASSLLGAREQYF	12061	0.163478		CASGVLGGGAETLYF	10422	0.136275		CSADVGGSGNTLYF	19468	0.278015		CASSLGGMDTEVF	12376	0.19961		CASSPTGGSYEQYF	32664	0.403357		CASGGQGNSPLYF	18075	0.279		CASSHSNYAEQF	23050	0.296636		CASSHRDWVTGQLYF	4229	0.0591926		CASSQSPGWTEVF	25205	0.318398		CASSLWYYEQCF	1515	0.0192897
CASSDRRYAEQF	12031	0.163072		CSADRANTEVF	10384	0.135778		CSVGQGNTEVF	19363	0.276516		CASSLRGDGNTEVF	12338	0.198997		CASSQNRNYAEQF	31539	0.389465		CARSGTTNTEVF	17159	0.264861		CASSLGAYEQYF	23028	0.296352		CSAAGTGIAEQF	4087	0.0572051		CASSLGSDYTF	24935	0.314987		CASSGLGGTKQF	1490	0.0189714
CSARLGGFAETLYF	12031	0.163072		CASSWDRNTEVF	10372	0.135621		CSPGGARTGQLYF	19033	0.271803		CASSSSQNTLYF	12220	0.197094		CASRDTNNQAPLF	31016	0.383007		CSAPGGASLYF	17044	0.263086		CASSPRDWGYEQYF	21488	0.276534		CTSSALGGLAEQF	4006	0.0560713		CASSQDWGYEQYF	24597	0.310718		CASSLWYYE_YF	1481	0.0188568
CASRTTSNSDYTF	12003	0.162692		CSSLTGNYAEQF	10372	0.135621		CSADRIGSNERLF	19018	0.271589		CASSLSTANTEVF	12052	0.194384		CSAGQLSNERLF	30603	0.377907		CSAGQGNERLF	16788	0.259134		CASSQDRNTEVF	20681	0.266148		CASSTTPSSDYTF	3228	0.0451818		CASSPGGQNTLYF	24580	0.310503		CSLTGANQAPLF	1452	0.0184876
CASSEPGLGENTLYF	12003	0.162692		CASSTGTSSYEQYF	10293	0.134589		CSGQDAETLYF	19014	0.271532		CASGGPGLSSYEQYF	12026	0.193965		CASSQDKTGVTEVF	30575	0.377561		CAWSLVGGSAETLYF	16731	0.258254		CASSPGQGNQDTQYF	20120	0.258929		CASSGINQDTQCF	3155	0.04416		CASSQDTWGSAETLYF	24443	0.308772		CASSLWYYEQHF	1312	0.016705
CSPGTAGYNSPLYF	11925	0.161635		CASGDAGAEVF	10273	0.134327		CSAEGRGTEVF	18874	0.269533		CASGARENTGQLYF	11853	0.191174		CASGGPGQYEQYF	29872	0.36888		CASGDDWGIHEQYF	16630	0.256695		CASSQGGDQDTQYF	19418	0.249895		CASSQSRGHYAEQF	3098	0.0433622		CRGTGENTLYF	24323	0.307256		CSAGVNTSYF	1309	0.0166668
CSAWGGGEQYF	11917	0.161526		CSAGGAGEQYF	10144	0.13264		CSGRQAETLYF	18871	0.26949		CASSRQSNSDYTF	11755	0.189594		CASGDERVGAETLYF	29254	0.361248		CRKQDTQYF	16294	0.251509		CASSLGTGSSYEQYF	14776	0.190156		CASSQSGDHYAEQF	2791	0.0390652		CASSPDRGHGTEVF	24030	0.303555		CANSLWYYEQYF	1272	0.0161957
CSADNGGINQDTQYF	11884	0.161079		CSADSAGGYAEQF	10056	0.13149		CASGDGGVDTQYF	18838	0.269019		CASSPQEQF	11752	0.189545		CASSPDWGGYEQYF	28763	0.355185		CASGDAPGGIEQYF	16291	0.251462		CASSPTGAGQDTQYF	13303	0.171199		CSETGPQGTQYF	2242	0.0313809		CASSQETINQDTQYF	23400	0.295597		CSLTGVDQAPLF	1261	0.0160557
CSDREGTEVF	11870	0.160889		CSVRDTEVF	9944	0.130025		CSSRLGGREQYF	18650	0.266334		CASSAGPFNQDTQYF	11329	0.182723		CASSGPTNNNQAPLF	28676	0.354111		CASSQGTGSQNTLYF	15912	0.245612		CASSLAVTGVLGQNTLYF	11851	0.152513		CASSGTNQDTQYF	2205	0.030863		CASSQDTGRSDYTF	23295	0.29427		CSLTGVSQAPLF	1228	0.0156355
CSADRDWAYEQYF	11847	0.160578		CASSLDNYAEQF	9903	0.129489		CSADGGRAEQF	18645	0.266262		CASSWTGASAETLYF	11278	0.1819		CASGESYNSPLYF	28214	0.348406		CAWRRQGLSQNTLYF	15729	0.242788		CASSLRGTGDSDYTF	11746	0.151162		CASSQSRDHYAEQLF	1971	0.0275878		CASSQERVDYAEQF	22889	0.289142		CTRSAGVNTLYF	1221	0.0155464
CSGTGGAGQDTQYF	11843	0.160523		CAWSKTGDDTQYF	9891	0.129332		CSAGGNTEVF	18637	0.266148		CASRPGQNTEVF	11220	0.180965		CASGVPGQGPNTEVF	27524	0.339885		CASSQGQNNQAPLF	15310	0.23632		CASSQDSSAETLYF	11116	0.143054		CASSDATDSGNTLYF	1751	0.0245085		CSADKNTLYF	22844	0.288573		CSAGVNALYF	1217	0.0154954
CSADTGGAGEQYF	11837	0.160442		CSAGDGYAEQF	9891	0.129332		CSADWGIQDTQYF	18523	0.26452		CASGEEGNNQAPLF	11196	0.180578		CASGPGLGNAETLYF	26605	0.328537		CAWSLRTEVF	15282	0.235888		CASSSDWGFNQDTQYF	10599	0.136401		CASSWDRVYGQYF	1672	0.0234027		CASSQEGLSSYEQYF	22815	0.288207		CASSGLGGIEQF	1201	0.0152917
CASRTGTGGALEQYF	11814	0.16013		CSAGWGREDTQYF	9869	0.129044		CSLGGSNTGQLYF	18497	0.264149		CASSLWDIQDTQYF	11130	0.179513		CSADQGGDTGQLYF	26471	0.326882		CSARTTNERLF	15277	0.235811		CASGPGQGNQDTQYF	9755	0.125539		CAWSLGTGGDEQYF	1622	0.0227029		CASRVSYNSPLYF	22677	0.286463		CASSLWYCEQYF	1162	0.0147951
CASSLAGDEQYF	11807	0.160035		CASSLDWGFAETLYF	9850	0.128796		CSASGTGGTEVF	18407	0.262864		CASGDDQDTQYF	10973	0.176981		CASSFGTGGAGSPLYF	26124	0.322597		CASSSPGANSDYTF	15069	0.2326		CASSLDWGGDYAEQF	9572	0.123184		CSSSPGGSAETLYF	1593	0.022297		CSADEQGADTEVF	22675	0.286438		CSLAGVNQAPLF	1161	0.0147824
CSAVGLGGPYNYAEQF	11718	0.158829		CASSQDQLDQDTQYF	9796	0.12809		CSADLSQNTLYF	18399	0.262749		CASSPLGEDTQYF	10822	0.174546		CASSQDGGAVAETLYF	26097	0.322264		CASGGSGTRTNSDYTF	15054	0.232369		CASSSRLRNYAEQF	8437	0.108578		CASSQSRDHYAGQF	1565	0.021905		CASSQGSGTGAERLF	21191	0.267692		CASSELGGTEQF	1141	0.0145278
CSADPGQGNSDYTF	11706	0.158666		CSALGGRGEQYF	9782	0.127907		CSADRGTNSDYTF	18368	0.262307		CASSLNANSDYTF	10810	0.174352		CASSQTGGDTEVF	24995	0.308655		CASAGTSNQAPLF	14524	0.224188		CASSQARGGSPLYF	8301	0.106827		CASSQSRDHYAERF	1553	0.0217371		CASSPGGLYEQYF	20841	0.263271		CSGTGRTSAETPYF	1130	0.0143877
CSAVTGNYAEQF	11703	0.158626		CASSLGNSNERLF	9734	0.127279		CSARTGGVNYAEQF	18310	0.261478		CASSGTGGAEVF	10756	0.173481		CASSLGTANSDYTF	24939	0.307964		CSAVQNERLF	14409	0.222413		CASSQGHANIGQLYF	5094	0.0655558		CASSRSRDHYAEQF	1536	0.0214991		CASGGQNSYNSPLYF	20528	0.259317		CASRGLGGTEQF	1126	0.0143368
CSAGGTEPNERLF	11696	0.158531		CASSPTNERLF	9720	0.127096		CSADRGQYEQYF	18244	0.260536		CASSDRGTGSSAETLYF	10674	0.172158		CASSDAAENSDYTF	24593	0.303691		CASSQDQGNSPLYF	14220	0.219495		CASSPGDWGGQYF	3923	0.0504859		CTIEIQSSKLTDSAVYFRASSQSRDHYAEQF	1448	0.0202674		CASSQDVGARAEQF	19279	0.243539		CTSSLWYYEQYF	1120	0.0142604
CASSDAAGAEQF	11663	0.158084		CSADDWGASAETLYF	9647	0.126142		CSSGDCEQYF	18219	0.260179		CASRDWGYEQYF	10610	0.171126		CASSDEGGANSDYTF	24437	0.301765		CSSRLQDTQYF	14052	0.216902		CSGPGQANTEAF	3079	0.0396243		CTRSADASSYEQYF	1396	0.0195396		CASSLGQGGNSDYTF	18629	0.235328		CSAGVSTLYF	1076	0.0137002
CSAGANQAPLF	11636	0.157718		CASSQDRLSTGQLYF	9640	0.12605		CSAVSGGVYEQYF	17972	0.256651		CASSRDRNTEVF	10610	0.171126		CASSPTGSNTEVF	24428	0.301654		CSAGTGDNQAPLF	13965	0.215559		CAGSPGDWGEQYF	2797	0.0359952		CASSQSRDHYAEQSF	1381	0.0193296		CASSFGTGGHNYAEQF	18517	0.233913		CASSGRGGTEQF	1067	0.0135856
CASSDLGAYEQYF	11608	0.157338		CSGTDYAEQF	9596	0.125475		CASSPRDNYEQYF	17925	0.25598		CASSREGNERLF	10593	0.170852		CASGDEAGGYAEQF	24273	0.29974		CASSLNVYEQYF	13859	0.213923		CASGPGDWGEQYF	2424	0.031195		CSALGGPAEQF	1328	0.0185878		CASSDDTANERLF	18378	0.232157		CASSL_YYEQYF	1059	0.0134837
CASGRLDNYAEQF	11551	0.156566		CASSDNYAEQF	9526	0.124559		CASSQSITTNTEVF	17916	0.255852		CASSEAGGHEQYF	10565	0.1704		CASSDVGEVF	24103	0.29764		CASSDPGSNSDYTF	13454	0.207671		CASSPGGWGEQYF	2048	0.0263562		CAGSQSRDHYAEQF	1323	0.0185178		CASTDSQNTLYF	17176	0.216973		CSADEGSYNSPPYF	948	0.0120704
CASSLQGANTGQLYF	11517	0.156105		CASSREGVERLF	9506	0.124298		CSAGGGQDTQYF	17889	0.255466		CASSSGPNTEVF	10556	0.170255		CASSDDRTGLSEQF	24023	0.296652		CASGEEQYF	13453	0.207656		CASSPGDGGEQYF	2019	0.025983		CASGQSRDHYAEQF	1283	0.0179579		CASSLEGSSYEQYF	16388	0.207019		CASSLWYHEQYF	940	0.0119685
CSSSRGRAEQF	11490	0.155739		CASGDAGYEQYF	9503	0.124259		CSAGTGETLYF	17839	0.254752		CSADREDTQYF	10530	0.169836		CASSGLGEGEQYF	23770	0.293528		CASGDQGRANERLF	13355	0.206143		CSATVSTEVF	1886	0.0242713		CASSGINQDAQYF	1262	0.017664		CASGTGGQDTQYF	15959	0.201599		CSLTGVNRAPLF	939	0.0119558
CSAEWGKYEQYF	11486	0.155684		CSARQGGYAEQF	9494	0.124141		CSADLGRNYAEQF	17816	0.254424		CASSLLPGANSDYTF	10498	0.16932		CASSPNPGNTLYF	23598	0.291404		CASADKNSNERLF	13257	0.204631		CSASGTGTEQF	1860	0.0239367		CTRSADNYEQYF	1242	0.0173841		CASSEKDRGYEQYF	15858	0.200324		CSARNQAPPF	937	0.0119303
CSADAGGSEQYF	11442	0.155088		CASSPHRDWGNAEQF	9470	0.123827		CSADGDWGSQNTLYF	17746	0.253424		CASSDWNSDYTF	10406	0.167836		CASSQGTTNTEVF	23450	0.289577		CSADGSDYTF	13002	0.200695		CASSPGDWGERYF	1858	0.023911		CASSQSRDRYAEQF	1149	0.0160824		CASSIRDRSSYEQYF	15525	0.196117		CSGTGRTSAEALYF	917	0.0116757
CSADSAETLYF	11423	0.154831		CSADGGQGGQNTLYF	9467	0.123788		CSSRDRDSYEQYF	17650	0.252053		CSAAGGSGNTLYF	10282	0.165836		CASSVTGEEVF	23400	0.288959		CASGTGGYNNQAPLF	12994	0.200571		CASGVAGGNQDTQYF	1842	0.0237051		CARSLGTGRDEQYF	1061	0.0148506		CASSGTGTSQNTLYF	15419	0.194778		CSGQSQDTQYF	907	0.0115484
CRSGRGDTQYF	11320	0.153434		CSAPGQGNYAEQF	9404	0.122964		CASSQGLGGDAEQF	17603	0.251382		CASSDTNSDYTF	10207	0.164626		CSGTGGDNYAEQF	23006	0.284094		CAKGRDQNTLYF	12859	0.198487		CASSPGDRGEQYF	1831	0.0235635		CASSQSRDHHAEQF	1054	0.0147527		CASSLSWGYEQYF	15252	0.192668		CTRSGQNQDTQYF	891	0.0113446
CSATDSSYEQYF	11248	0.152459		CSAKLSQNTLYF	9395	0.122847		CSADMGGGSYEQYF	17583	0.251096		CALPSGTGGDQDTQYF	10111	0.163078		CASSQDRVAETLYF	22788	0.281402		CASSQGTGGFLPEQF	12380	0.191094		CASSQGQDTGRLYF	1775	0.0228429		CRPGQNYAEQLF	1016	0.0142208		CASSAGGVYAEQF	14970	0.189106		CGARLGGPSAETLYF	884	0.0112555
CSAGGREQYF	11246	0.152431		CSADDDTQYF	9377	0.122611		CASRTANSDYTF	17558	0.250739		CASSSGGALAEQF	10016	0.161546		CASSRQDYNSPLYF	22048	0.272264		CASSPTGGAQDTQYF	12339	0.190461		CSGTRGNTEVF	1684	0.0216718		CSGGQTNTEIF	987	0.0138149		CASSLAQGAEQF	14682	0.185468		CARSGLGGTEQF	877	0.0111664
CSAGTPEVF	11232	0.152242		CASSSGGTNTGQLYF	9361	0.122402		CSAGGGVAEQF	17523	0.250239		CASAPRDWGGGDTQYF	9941	0.160336		CASSAGQGAGNTLYF	21946	0.271004		CASGAATEQF	11941	0.184317		CASSPRDWGEQYF	1663	0.0214015		CASSQSRDHCAEQF	922	0.0129051		CASSQTDERLF	14515	0.183358		CASSGLGGTEPF	867	0.0110391
CSKGRYAEQF	11209	0.15193		CSAETGANTEVF	9343	0.122167		CSADNLGQDTQYF	17519	0.250182		CASSPGTDANTEVF	9939	0.160304		CASSSLGDYEQYF	21650	0.267349		CASSAGLGSQDTQYF	11832	0.182635		CASSPGD_GEQYF	1525	0.0196256		CASGGPGQGAEQSF	862	0.0120653		CASSLGWGGGTQYF	14420	0.182158		CASSGLGGTEHF	861	0.0109627
CSGEGPETLYF	11195	0.15174		CSAEDSSQNTLYF	9326	0.121944		CSADRNSDYTF	17490	0.249768		CAWRRTGPEQYF	9902	0.159707		CASSQDNQDTQYF	21132	0.260952		CASSDLGGNYAEQF	11725	0.180983		CSATGGAGNSPLYF	1486	0.0191237		CRPGQNYAGQF	862	0.0120653		CASSLDGRGSPLYF	13963	0.176385		CTRSGTGRTSAETLYF	857	0.0109117
CSADSGASAETLYF	11186	0.151618		CASSHPGQGQDTQYF	9321	0.121879		CSADGSANTEVF	17426	0.248854		CASSERTKDTQYF	9892	0.159546		CASSRTGYEQYF	21089	0.260421		CASSLDWDSAETLYF	11542	0.178158		CTSSPGDWGEQYF	1480	0.0190464		CASSGRDWGARNQDTQYF	849	0.0118833		CASSLRGITEVF	13598	0.171775		CASSPTASDERLF	855	0.0108863
CSAGSSYEQYF	11155	0.151198		CSAVGNQDTQYF	9298	0.121578		CASSPDRANTEVF	17420	0.248769		CASSAWGSSQNTLYF	9873	0.159239		CASGGQPYEQYF	21009	0.259433		CASGGQGNTEVF	11146	0.172046		CTRSGTANTEVF	1439	0.0185188		CSALGGLAEQLF	844	0.0118133		CASSLDNYEQYF	12980	0.163968		CSGQNQGTQYF	846	0.0107717
CSEYAEQF	11147	0.15109		CSAEGSQDTQYF	9298	0.121578		CASSQGLNTEVF	17382	0.248226		CASSDPGQNYAEQF	9860	0.15903		CASSPGQGARGQNTLYF	20981	0.259088		CASGGGGYAEQF	10975	0.169406		CSSTGTGGGQNALYF	1387	0.0178496		CSSRGLSSNERLF	844	0.0118133		CASSQEGGLSYEQYF	12910	0.163083		CSGTGRASAETLYF	842	0.0107208
CASGDADANSDYTF	11048	0.149748		CSATGGRGEQYF	9281	0.121356		CASGDAQYEQYF	17215	0.245841		CASSDLDTGQLYF	9859	0.159014		CASSDADRNSDYTF	20890	0.257964		CASSQVGEGYAEQF	10891	0.16811		CAGSLGTGSSYEQYF	1376	0.017708		CASSHRDWATGQLCF	783	0.0109595		CASSQEGGGDTQYF	11952	0.150982		CGLTGVNQAPLF	834	0.0106189
CSADAAGRDTGQLYF	10985	0.148894		CSADANNSPLYF	9270	0.121212		CSGGHTSAETLYF	17088	0.244027		CAWKYGGAETLYF	9850	0.158868		CASSQDLVNQDTQYF	20730	0.255988		CASGDDEQYF	10831	0.167184		CASSPGDWGEQHF	1312	0.0168844		CASSQDWAGIDTQYF	781	0.0109315		CASSLVAGGTGQNTLYF	10288	0.129961		CSAGQGANTGRLYF	823	0.0104788
CASGGLGGLEQYF	10964	0.148609		CASRGGGNYAEQF	9249	0.120937		CSAVQDSNTGQLYF	17079	0.243899		CAWSGGDQDTQYF	9824	0.158449		CASSGGTGASAETLYF	20555	0.253827		CASGDAGAETLYF	10746	0.165872		CSAPGADTEQF	1244	0.0160093		CSAEWGRAPLF	777	0.0108755		CASSSYWGVQDTQYF	8674	0.109573		CTRSASRGQNTLYF	806	0.0102624
CSPRGRSTEVF	10946	0.148365		CSANWGGTGQLYF	9246	0.120898		CSPTGDTLYF	16968	0.242314		CAWSLVVGGGQNTLYF	9773	0.157626		CASRPGQTEVF	20470	0.252777		CASGDRARQNTLYF	10741	0.165795		CASSPGDWGEQCF	1226	0.0157777		CSADFGRSTGQLYF	773	0.0108196		CASSFPYEQYF	8310	0.104975		CSGTGGTSAETLYF	799	0.0101733
CSADRGAVTEVF	10938	0.148257		CSARANTGQLYF	9221	0.120571		CASSPSLGGRSAETLYF	16757	0.239301		CASSQDAGGDTQYF	9755	0.157336		CASSQARDRYAEQF	20085	0.248023		CARRLGETLYF	10695	0.165084		CASSPGDWGE_YF	1157	0.0148897		CAWSLGTGRGEQYF	766	0.0107216		CTGSAPHWGQDTQYF	7880	0.0995428		CASSQEGVGGRRSAETLHF	770	0.00980401
CSADSSGNTLYF	10924	0.148067		CASSRDRSYEQYF	9199	0.120284		CSGQSQNTLYF	16551	0.236359		CASSPLQGAETLYF	9608	0.154965		CASSGTGYEQYF	19967	0.246566		CASSRWGAETLYF	10623	0.163973		CVSSPGDWGEQYF	1143	0.0147095		CVSSQARGAEQF	746	0.0104416		CASSFTGVQDTQYF	7753	0.0979385		CSASRGQSTLYF	761	0.00968942
CASSDARANSDYTF	10908	0.14785		CSAPDSQNTLYF	9192	0.120192		CSAGQSNTEVF	16511	0.235787		CASGGRDWAAETLYF	9546	0.153965		CASSTHERAYEQYF	19594	0.24196		CASGTPSQNTLYF	10544	0.162754		CSADGATEVF	984	0.0126633		CRGTPYERYF	740	0.0103577		CASSFRVQNTLYF	7590	0.0958794		CGAGVNTLYF	760	0.00967669
CSADGVEQYF	10903	0.147782		CSAELGPSAETLYF	9164	0.119826		CASSLGLGGHAEQF	16413	0.234388		CASAGTGNERLF	9483	0.152949		CASSQDRDRGSPLYF	19491	0.240688		CASGDAGRPNERLF	10497	0.162028		CSALRDRNTEVLF	959	0.0123416		CAWSLGAGRDEQYF	739	0.0103437		CASRRDWGGYEQYF	7437	0.0939467		CASSGLGGTEQYF	760	0.00967669
CSADTGANTEVF	10891	0.14762		CAWRQGANSDYTF	9150	0.119643		CSADQTISNERLF	16387	0.234017		CAWSLGAANTEVF	9411	0.151788		CASGAPTGSNERLF	19285	0.238144		CASSRVGRAETLYF	10444	0.16121		CGAGVPEVF	955	0.0122901		CSAERYNSPLHF	732	0.0102457		CGAEGTNSDYTF	6552	0.0827671		CGADEGSYNSPLYF	755	0.00961303
CASSPTGDEQYF	10745	0.145641		CSAEGGANTEVF	9148	0.119617		CASSQATNYAEQF	16368	0.233745		CASSHDWGGYEQYF	9377	0.151239		CASSDRTGGVYEQYF	18947	0.23397		CASQRAAEDTQYF	10150	0.156672		CTRSAPGADAEQF	954	0.0122772		CTRSASRGQDTQYF	714	0.00999374		CASSQEGQSSYEQYF	6457	0.081567		CSLWYYEQYF	751	0.0095621
CSARPSSYEQYF	10735	0.145505		CSGDRGQNTLYF	9143	0.119551		CSAGQDNERLF	16324	0.233117		CASSVTGANTEVF	9368	0.151094		CASSDAGGGSDYTF	18925	0.233699		CASGGFRDTEVF	10123	0.156255		CANSPGDWGEQYF	946	0.0121743		CSAVAGGHEGLF	708	0.00990976		CASSLGGTGNTLYF	6135	0.0774994		CGASRGQNTLYF	747	0.00951117
CASNAVSNERLF	10733	0.145478		CSGTGVEQYF	9097	0.11895		CSADTSYEQYF	16270	0.232346		CAWSLVGATQNTLYF	9312	0.150191		CASSQAVYEQYF	18414	0.227389		CASGDAGYNSPLYF	10104	0.155962		CGAAGGAGNSPLYF	946	0.0121743		CAWSLGTGRDGQYF	706	0.00988176		CASSLELGGSQDTQYF	5850	0.0738992		CSADGGSYNSPLYF	742	0.0094475
CSRDNNQAPLF	10729	0.145424		CSAEAGGEDYAEQF	9096	0.118937		CASGGEYEQYF	16267	0.232303		CASSDINERLF	9306	0.150094		CASSQDSTISQNTLYF	18363	0.226759		CASSVDSQDIQYF	10004	0.154418		CASSSGDWGEQYF	927	0.0119298		CASSQSRDHYTEQF	658	0.00920992		CASSRRLGGGSAETLYF	5793	0.0731791		CSGRNQDTQYF	740	0.00942204
CASSDASANSDYTF	10713	0.145207		CRTLGSAETLYF	9067	0.118558		CASSDNQGTYEQYF	16237	0.231875		CAWRNWDSAETLYF	9298	0.149965		CASSPGQGANERLF	18194	0.224672		CASGDRDRENERLF	9976	0.153986		CASSPGDWGKQYF	914	0.0117625		CSSRGLFSNEK_SF	651	0.00911194		CSGTVSNERLF	5672	0.0716506		CSAGLGGPSAETLYF	739	0.00940931
CSATGVGNTLYF	10693	0.144936		CSADPGAYNSPLYF	9046	0.118283		CSAGQANTEVF	16185	0.231132		CASSRQGVSNERLF	9263	0.149401		CASTGGPYAEQF	18054	0.222943		CASGDGQGEQYF	9912	0.152998		CSADRATEAF	897	0.0115437		CSAGPDYTF	647	0.00905595		CASSRTINQDTQYF	5629	0.0711074		CSGQNQDAQYF	739	0.00940931
CASGEQGENTLYF	10655	0.144421		CSAQGSNTEVF	9039	0.118192		CSAGGQDTQYF	16080	0.229633		CASDDSGAETLYF	9102	0.146804		CASSRDRSNERLF	17962	0.221807		CASSAGTGKDTQYF	9764	0.150714		CASSPEDWGEQYF	851	0.0109517		CTRSALGGLAEQF	645	0.00902796		CASSLERALNTEVF	5355	0.0676462		CTRSARLGGPSAETLYF	719	0.00915466
CSARTDNNQAPLF	10650	0.144353		CASGNTGGNQDTQYF	9032	0.1181		CSAPGQPLSNERLF	15953	0.227819		CASGDRQQQNTGQLYF	9093	0.146659		CASSQDRVTGQLYF	17889	0.220906		CASSQGGDTQYF	9749	0.150482		CSAPGADAGQF	829	0.0106686		CAGSTTPNSDYTF	630	0.008818		CASSFGTGNYAEQF	5203	0.065726		CASSQDTGGYAEKF	718	0.00914192
CSADRETTNERLF	10630	0.144082		CSAERGDTLYF	9014	0.117865		CSGTGGVSQNTLYF	15888	0.226891		CASSEGDQDTQYF	9043	0.145852		CASGAWVGRGDTLYF	17835	0.220239		CASSQDRAGNTLYF	9742	0.150374		CSAPGADAEQLF	826	0.01063		CASGALGGRGEQHF	629	0.00880401		CSEAVSNERLF	4501	0.0568581		CASRPGQEGTVVF	702	0.0089382
CASSFQGGENTLYF	10527	0.142686		CSAAGGQGHTEVF	8993	0.11759		CSADWGRDERLF	15886	0.226862		CASSRDTSNSDYTF	8943	0.14424		CASSPRQGISNERLF	17540	0.216596		CASSPTDSGNTLYF	9732	0.15022		CASSLGDWGEQYF	802	0.0103211		CASSQPRDHYAEQF	628	0.00879001		CTRSAPHWGQDTQYF	4328	0.0546728		CASFLWYYEQYF	680	0.00865809
CASSDGSDYTF	10457	0.141737		CSAGQDNSPLYF	8989	0.117538		CASSPRDNYAEQF	15841	0.226219		CASGDYRASYEQYF	8899	0.14353		CASSDAQVAETLYF	17532	0.216497		CASSYPGQGDTEVF	9690	0.149572		CSPGDWGEQYF	793	0.0102053		CAWGLGTGRDEQYF	622	0.00870603		CSAPHWGQGTQYF	4289	0.0541801		CSASRGQNALYF	679	0.00864536
CAWRLGENTLYF	10455	0.14171		CASSPTGGDEQYF	8967	0.11725		CSADQGGNERLF	15815	0.225848		CASSDGWTGGNSDYTF	8891	0.143401		CASSLTGAGAGQF	17426	0.215188		CASGVATGGDYAEQF	9682	0.149448		CASSPGDWEEQYF	770	0.0099093		CSSRGLFSNERSF	615	0.00860805		CSETVSNEGLF	3933	0.049683		CTRSADEGSYNSPLYF	678	0.00863262
CASSDTNSDYTF	10441	0.14152		CSAGTPNERLF	8931	0.116779		CASSQGLGGSAETLYF	15809	0.225762		CASSLGQGLYEQYF	8820	0.142256		CASGVGAGAEQF	17321	0.213892		CATRAEGTEVF	9601	0.148198		CASSQDPGESTQYF	754	0.00970339		CSAARETYAEQSF	604	0.00845409		CTRSETVSNERLF	3835	0.048445		CSAGRGANTGQLYF	674	0.00858169
CASSDVGGSAETLYF	10437	0.141466		CSARDRGRDEQYF	8900	0.116374		CSAGGVSQNTLYF	15690	0.224063		CASGDTSQNTLYF	8763	0.141336		CASSRQGPNERLF	16885	0.208507		CASSQGTHNERLF	9598	0.148152		CAWSLRDNAGQLYF	738	0.00949748		CASSQSRDYYAEQF	602	0.00842609		CSAPHWGQDAQYF	3797	0.047965		CASSFWYYEQYF	672	0.00855623
CSADGGAREQYF	10397	0.140924		CSAGQGQNTLYF	8880	0.116113		CSAERGGNTLYF	15659	0.22362		CASGDAGFQDTQYF	8754	0.141191		CASGLRGENTLYF	16871	0.208335		CASSPNRGRYAEQF	9577	0.147827		CSATGNEQYF	708	0.00911141		CSADNYGQYF	592	0.00828612		CSETASNERLF	3658	0.0462091		CSAGVDTLYF	668	0.0085053
CSAGGSDYTF	10311	0.139758		CSADISYEQYF	8863	0.11589		CSATNSGNTLYF	15547	0.222021		CASSQNWGVYAEQF	8640	0.139353		CASSRDRGERLF	16775	0.207149		CASGGTDSQNTLYF	9519	0.146932		CSGRTSQNTLYF	697	0.00896985		CASSQSRDNNQDTQYF	591	0.00827213		CASSAGTASGNTLYF	3591	0.0453627		CSGQNQDTQHF	665	0.0084671
CASSPPGQGAYEQYF	10307	0.139704		CASSPPRANTEVF	8845	0.115655		CSAGYQNTLYF	15489	0.221193		CASSLGDRNTEVF	8555	0.137982		CASSSGTNTEVF	16711	0.206359		CASGDAHYEQYF	9467	0.146129		CASSPGDWREQYF	694	0.00893124		CSDRFSSERLF	590	0.00825813		CSETVPNERLF	3524	0.0445164		CASGGRQSHNTLYF	661	0.00841617
CSAGQLSNERLF	10253	0.138972		CSADRQYEQYF	8844	0.115642		CKQTGDQNTLYF	15394	0.219836		CASSDVGESSYEQYF	8527	0.13753		CASSQEDWGGPGQLYF	16670	0.205853		CASSQEGDGNTLYF	9463	0.146068		CSAEALNQDAQYF	682	0.00877681		CGAEWGQAPLF	590	0.00825813		CASRLTRDSQDTQYF	3452	0.0436068		CSGAGRTSAETLYF	659	0.00839071
CSAPPGHHNQAPLF	10159	0.137698		CSATGTDTLYF	8844	0.115642		CAWSRGVNSPLYF	15374	0.21955		CASSLFGWQDTQYF	8508	0.137224		CASSQDGTIF	16538	0.204222		CASGDAYEQYF	9444	0.145774		CSAPGADAEQSF	679	0.0087382		CASSILSSQNTLYF	589	0.00824413		CSAVGTDSDYTF	3212	0.0405751		CASSQQGSYNSPLYF	639	0.00813606
CSAAISNERLF	10147	0.137535		CSADQGTPNQAQHF	8841	0.115603		CAWSRDNQDTQYF	15360	0.21935		CASSPGTGVYEQYF	8436	0.136062		CASSTTTNSDYTF	16451	0.203148		CASGEMDTTEVF	9383	0.144833		CASNPGDWGEQYF	678	0.00872533		CSASRGQDAQYF	586	0.00820214		CGARDGIGNSPLYF	3079	0.038895		CASSRDRPGTNQDTQYF	636	0.00809786
CSALGGLYNYAEQF	10122	0.137196		CSAGDRGYEQYF	8839	0.115576		CSAGGLTEVF	15319	0.218765		CASSSGRSAETLYF	8415	0.135724		CASSNSENTEVF	16122	0.199085		CASGDSGASAETLYF	9377	0.14474		CASSQDGGDQDTQYF	650	0.00836499		CSSRGPFSNERLF	582	0.00814616		CASSLAPASDYTF	3033	0.0383139		CASSGLGGPEQF	629	0.00800873
CSARTAGNTLYF	10102	0.136925		CSADSYAEQF	8831	0.115472		CSAHQLTYEQYF	15267	0.218022		CAWSLSGANYAEQF	8412	0.135675		CASSLQGAGNTLYF	16036	0.198023		CASSQDRGTQDTQYF	9336	0.144107		CSADPVNTLCF	644	0.00828778		CSADDYEQYF	575	0.00804818		CASSFRGNQDTQYF	3031	0.0382886		CGGTGRTSAETLYF	628	0.007996
CAWSQGDNSPLYF	9944	0.134784		CASSQGAETLYF	8803	0.115106		CASSLQYQDTQYF	15176	0.216723		CASGDARGHGTEVF	8403	0.13553		CASSQTGGEGTEVF	15723	0.194158		CASGDGTNYAEQF	9319	0.143845		CTRSADARDTLYF	636	0.00818482		CASSQSRNHYAEQF	570	0.00797819		CSETVSNGRLF	2937	0.0371012		CSAGQGANTGQPYF	626	0.00797053
CSAEEGVGTEVF	9869	0.133767		CSAGSNTEVF	8788	0.11491		CASSAGSQNTLYF	15170	0.216637		CSAVTGGKWDTQYF	8386	0.135256		CASSQDEGRYAEQF	15350	0.189552		CASGDGYNSPLYF	9283	0.143289		CSGHTSQSTLYF	615	0.00791457		CASSQSRDHYAE_F	567	0.0079362		CAGSPAGAETLYF	2724	0.0344105		CTRSARNQAPLF	618	0.00786868
CSAGGGEVF	9775	0.132493		CASSLGGEQYF	8766	0.114622		CSAVTVISNERLF	15159	0.21648		CASRTASNERLF	8384	0.135224		CGATGINQAPLF	15289	0.188799		CASRYNAETLYF	9225	0.142394		CASRGSSYGQYF	612	0.00787596		CSAARETYAGQF	566	0.00792221		CSETVSNERLLF	2705	0.0341705		CSAGEGSYNSPLYF	618	0.00786868
CASSDWDSQNTLYF	9727	0.131843		CSARDRGYNSPLYF	8748	0.114387		CSAEPGGSDYTF	15059	0.215052		CASGAWGANTGQLYF	8371	0.135014		CASSLTGAGAEQF	14721	0.181785		CASGDQGWEQYF	9143	0.141128		CTRSALRDRNTEVF	596	0.00767005		CSSRGLLSNERLF	565	0.00790821		CASSDPLGGDTQYF	2702	0.0341326		CASSGLGGTVQF	609	0.00775408
CSDRGHNYAEQF	9721	0.131761		CSAEFGGVREQYF	8739	0.114269		CSADWDWGYEQYF	15054	0.214981		CASSERTFSNERLF	8353	0.134724		CASSQNNQAPLF	14691	0.181414		CASSQEGGAGNSPLYF	9075	0.140079		CSASGGCNQAQHF	592	0.00761858		CSTERYNSPLYF	555	0.00776824		CASSRLGGANTGQLYF	2651	0.0334883		CSADEGSYSSPLYF	605	0.00770315
CKDSSNERLF	9675	0.131138		CSARQGENTLYF	8718	0.113994		CASGANTGQLYF	14991	0.214081		CASSEGTVGEQYF	8311	0.134046		CASSLQGSHPEVF	14223	0.175635		CANHRRAYEQYF	8997	0.138875		CASRGQGSNERLF	589	0.00757997		CSASRGQGTQYF	553	0.00774025		CSETVSSERLF	2634	0.0332736		CASSGLGATEQF	599	0.00762676
CAWSPSGGVQDTQYF	9674	0.131124		CSARLGGRPEQF	8711	0.113903		CASGETGANTGQLYF	14984	0.213981		CASSLGTGQDTQYF	8289	0.133691		CTYSAVGDQDTQYF	14091	0.174005		CSAGGEEQYF	8934	0.137902		CASGAAGGDQDTQYF	588	0.0075671		CSADPAAHTEVF	550	0.00769826		CGAPHWGQDTQYF	2533	0.0319977		CASSITANSDYTF	592	0.00753763
CASSGTISNERLF	9581	0.129864		CASSLSRGQNTLYF	8699	0.113746		CAWSRRLGGYAEQF	14909	0.21291		CSAGGGNTEVF	8218	0.132546		CASGDARGVNQDTQYF	14023	0.173166		CASSQDRGQDTQYF	8883	0.137115		CTRSADWGSYEQYF	586	0.00754136		CRANSYNSPLYF	548	0.00767026		CSAPHWGQDTQHF	2458	0.0310503		CSARLGGASAETLYF	591	0.0075249
CASSPGLGGRQNTLYF	9566	0.12966		CSAPNSDYTF	8694	0.11368		CASSQDPDRAEQYF	14868	0.212324		CASSAQGANSDYTF	8214	0.132482		CASRQAYNSPLYF	13771	0.170054		CASGDVRTTEVF	8819	0.136127		CASSQGRGSSYEQYF	571	0.00734832		CASSWDTNSDYTF	547	0.00765627		CGASAVGGAETLYF	2448	0.030924		CASSQEGVGGRRSTETLYF	585	0.0074485
CASSPYNSPLYF	9545	0.129376		CASGEGGYEQYF	8655	0.11317		CSGGGNQNTLYF	14807	0.211453		CASSAGTWNTGQLYF	8207	0.132369		CASSLRQGGGAERLF	13679	0.168918		CASGDQTSNTGQLYF	8817	0.136096		CGAPGADAEQF	566	0.00728398		CASSTRGQNTLYF	541	0.00757229		CSETVSDERLF	2444	0.0308734		CSAGQGASTGQLYF	575	0.00732118
CASSFRDSYAEQF	9515	0.128969		CSLTGGFNQDTQYF	8632	0.11287		CASSPRGTETLYF	14745	0.210568		CASSLETSAETLYF	8179	0.131917		CASSPQTGGVSYEQYF	13385	0.165287		CAGDRGSTEVF	8716	0.134537		CASGAAGGNQDAQYF	555	0.00714242		CASSLAGQPYF	538	0.0075303		CASSRRLGGGSAETLHF	2441	0.0308355		CTRSAGQGANTGQLYF	567	0.00721932
CASSLYRNSDYTF	9429	0.127803		CASSLVGLNSDYTF	8631	0.112857		CSGGQRDTEVF	14663	0.209397		CASSDTGGVEQYF	8136	0.131224		CSEGLGDNYAEQF	13114	0.161941		CASSQDRAANTEVF	8713	0.134491		CTRSATGDEQYF	545	0.00701372		CASSLRDWGTSAETPYF	532	0.00744631		CSAPH_GQDTQYF	2426	0.030646		CSASRGQDTLYF	566	0.00720659
CASSDLRTGAYEQYF	9384	0.127193		CSPTGTGQLYF	8629	0.11283		CASGDAEQF	14660	0.209354		CASGGPGRGNAEQF	8126	0.131062		CASSLGYEQYF	12687	0.156668		CASGVGTDANTEVF	8668	0.133796		CASSSRLGSYAEQF	544	0.00700086		CASSQLRDHYAEQF	530	0.00741832		CASSRGSNTGQLYF	2371	0.0299513		CSGQDQDTQYF	564	0.00718112
CSAGTGDQAPLF	9347	0.126692		CSVGRGGDTQYF	8624	0.112765		CSAGTGGAEVF	14653	0.209254		CAWSSGGSEQYF	8085	0.130401		CASSFRGGNTLYF	12472	0.154013		CASGRDRGRNSPLYF	8634	0.133272		CSASGTGAERF	543	0.00698799		CSAGTVYAEQSF	529	0.00740432		CSAPHWGQDTRYF	2349	0.0296734		CSARLGGPSAEALYF	550	0.00700287
CASGGTGDYAEQF	9322	0.126353		CASSLAGRNTEVF	8618	0.112687		CSAGDRGMEVF	14632	0.208954		CAWSPSNQAPLF	8083	0.130369		CASSQTGFERLF	12468	0.153963		CASGDYNYEQYF	8607	0.132855		CASGAAGGNQGTQYF	543	0.00698799		CSGRFSNERLF	526	0.00736233		CGETVSNERLF	2342	0.0295849		CASGDEAGGVF	547	0.00696467
CASSDATEVF	9302	0.126082		CSAGQGRDTLYF	8608	0.112556		CSAWGGSYEQYF	14598	0.208469		CASSQEGGVNQDTQYF	8070	0.130159		CASSQGQSSQNTLYF	12315	0.152074		CASSPGLGGYEQYF	8478	0.130864		CSAPGADAERF	538	0.00692364		CSSRGLFSNEGLF	525	0.00734834		CASSIATYEQYF	2292	0.0289533		CASGDETGGAF	542	0.00690101
CASSLGQGRSDYTF	9286	0.125865		CASSLRDISNERLF	8589	0.112307		CAWSLAGGLQDTQYF	14430	0.206069		CAWSAGGAGEQYF	8026	0.12945		CASSSGTGKVF	12303	0.151926		CASGAGYEQYF	8461	0.130601		CSADRAAEVF	536	0.0068979		CVSSQSRDHYAEQF	522	0.00730635		CASSLDCFYEQYF	2186	0.0276143		CSAGVNTLHF	539	0.00686281
CASSLGYAEQF	9269	0.125635		CSAPSNQDTQYF	8575	0.112124		CASSQDRDRGAETLYF	14403	0.205684		CASTNGQGPFF	7974	0.128611		CASSHGLGSSYEQYF	12038	0.148653		CASGDATGNERLF	8407	0.129768		CARSLRDNTGQLYF	534	0.00687216		CSAERYNSPPYF	515	0.00720837		CSAPRWGQDTQYF	2074	0.0261995		CSGTGRTSAETLCF	534	0.00679915
CSAEGGSSYEQYF	9237	0.125201		CSADPHTEVF	8570	0.112059		CASSQEDWGNYEQYF	14385	0.205427		CASSGTANSDYTF	7955	0.128304		CASSLGQTSNERLF	11992	0.148085		CASSQDPGGDSDYTF	8403	0.129706		CTRSAVSQNTLYF	530	0.00682069		CAGSGINQDTQYF	515	0.00720837		CASSIEDSQNTLYF	2066	0.0260984		CASSHVWGYEQYF	526	0.00669729
CSLGLSSYEQYF	9226	0.125052		CSAGDSYAEQF	8568	0.112033		CASSHTEQDTQYF	14120	0.201643		CSPGNLSNERLF	7928	0.127869		CASSQGGGNTEVF	11696	0.14443		CASSQDQTFSNERLF	8387	0.129459		CSALRDRSTEVF	530	0.00682069		CASSESGGGQNALYF	514	0.00719437		CASSPDRGHGAEVF	1973	0.0249236		CSAGVNTLCF	526	0.00669729
CSAEGQGRTYEQYF	9213	0.124876		CSALGGRSAETLYF	8562	0.111954		CASSQEGDQDTQYF	14104	0.201414		CSADANSERLF	7848	0.126579		CASSLETGNTEVF	11518	0.142232		CASSQDLWGDAEQF	8304	0.128178		CASSQGRDTGQLYF	524	0.00674347		CASSTAPNSDYTF	507	0.00709639		CSAPHWGQDTQCF	1849	0.0233572		CASGDETGGVLF	525	0.00668455
CASSAGTGGSAETLYF	9132	0.123778		CASSLGLEQYF	8535	0.111601		CASSQDNGRDTQYF	13990	0.199786		CASGDGANTEVF	7668	0.123675		CASSPHWGSQNTLYF	10950	0.135218		CASGDGGLGGYEQYF	8295	0.128039		CASSSRLGNYAERF	522	0.00671773		CASPTTPNSDYTF	503	0.00704041		CASSLDPSAETLYF	1793	0.0226498		CASSGLGGTAQF	525	0.00668455
CASSAGTGGGQAPLF	9066	0.122883		CASGVGVANERLF	8517	0.111366		CASSQENWGETGQLYF	13896	0.198444		CAWSLLRNSGNTLYF	7623	0.12295		CASSPGGDDTEVF	10778	0.133094		CASGDAVGRNSDYTF	8283	0.127854		CSGHTSQNTSYF	512	0.00658904		CRPGQNYAEQSF	502	0.00702641		CSAPHWGRDTQYF	1744	0.0220308		CASSQGGTANSDYTF	525	0.00668455
CASSLGGDTGQLYF	9037	0.12249		CSATGSNTGQLYF	8506	0.111222		CSAGDWGDHAEQF	13816	0.197301		CASGELGTGGYEQYF	7603	0.122627		CASSGRQYNSPLYF	10770	0.132995		CASSQAGENTGQLYF	8276	0.127746		CARSPGDWGEQYF	508	0.00653756		CASSLRDWGTSAEALYF	498	0.00697042		CASSLDPSQNTLYF	1738	0.021955		CSADEGPYNSPLYF	519	0.00660816
CASGDEQISNERLF	9019	0.122246		CSAFGTNNQAQHF	8477	0.110843		CAWSLVGGQNTLYF	13753	0.196402		CAWSHRGQNTLYF	7551	0.121788		CASSQAGTGDGERLF	10685	0.131946		CASSDEDWGYEQYF	8269	0.127638		CTRSADRATEVF	504	0.00648609		CTRSAERYNSPLYF	495	0.00692843		CASGLGDRNYAEQF	1725	0.0217908		CSGTGRTGAETLYF	519	0.00660816
CASRLSSYEQYF	9014	0.122178		CASGAGTGIGERLF	8449	0.110477		CSGGTNNQAQHF	13668	0.195188		CSAGANNERLF	7543	0.121659		CASSQDWGGNNQAPLF	10607	0.130982		CASGDASGYEQYF	8262	0.127529		CSAGGNYEQYF	499	0.00642174		CTRRPGQNYAEQF	492	0.00688644		CASSQAGGWGQYF	1706	0.0215508		CASGQEGVGGRRSAETLYF	512	0.00651903
CASGEDWGGPYAEQF	8955	0.121379		CSGRDKNSPLYF	8437	0.11032		CASSPAGKGDNSPLYF	13642	0.194816		CASSSGTGVNERLF	7482	0.120675		CASSLGGVNAEQF	10042	0.124005		CASSQGFSDYTF	8252	0.127375		CTRSAGDNYEQYF	497	0.006396		CASSGINQGTQYF	490	0.00685845		CSAPHRGQDTQYF	1608	0.0203128		CASSQEGVGGRRSAETPYF	507	0.00645537
CSGTGSAETLYF	8841	0.119833		CAWSSQGHTEVF	8407	0.109928		CAWSRGLGGREQYF	13603	0.194259		CASGEPTNTEVF	7470	0.120482		CASSLDEGADQDTQYF	9441	0.116584		CASSHREGDTEVF	8224	0.126943		CASGAAGGSQDTQYF	496	0.00638313		CSGGQANTEVF	488	0.00683045		CASSLEGRQDTQYF	1604	0.0202623		CASSQDGAANSDYTF	504	0.00641717
CSADRTSNERLF	8805	0.119345		CSATGTGDDEQYF	8399	0.109823		CSGTGAGNTLYF	13558	0.193617		CASGDWEGTQYF	7441	0.120014		CASSPDRDNSPLYF	9429	0.116436		CASSQVQTSAETLYF	8219	0.126866		CSADYNSYNSPLCF	491	0.00631879		CASSMDWGGAQDTQYF	485	0.00678846		CASSSPGSYNYAEQF	1591	0.020098		CASRRISYEQYF	503	0.00640444
CSGDRGGERLF	8802	0.119305		CASSPGKDTQYF	8386	0.109653		CASSPNWGGGAEQF	13530	0.193217		CASSGSYNSPLYF	7388	0.119159		CASSQTGAGTEVF	9364	0.115633		CASGGTGSNSDYTF	8148	0.12577		CASSAGDNYEQYF	490	0.00630592		CTIEIQSSKLTDSAVYFYASSQSRDHYAEQF	480	0.00671848		CSETVSNERSF	1584	0.0200096		CSGTGRTSAEPLYF	502	0.00639171
CASSGGGWYAEQF	8801	0.119291		CASSRDWGGADYAEQF	8338	0.109025		CASSQDLGVGAETLYF	13420	0.191646		CAWKLGGGEQYF	7294	0.117643		CASSLGDNNSPLYF	8690	0.10731		CASSQDRDREGGDTQYF	8147	0.125754		CSADRATEVLF	489	0.00629305		CSAEGGQAPLF	478	0.00669049		CSETVSNERLSF	1553	0.019618		CASSRIWGYEQYF	499	0.00635351
CASSLESSYEQYF	8793	0.119183		CASSLDSGAEQF	8335	0.108986		CAWGRDRVNSDYTF	13340	0.190504		CASSRLGSAETLYF	7236	0.116708		CASSFSTVNERLF	8211	0.101395		CASSQDIFSNERLF	8104	0.125091		CSALRDGNTEVF	488	0.00628018		CSAVGDE_YF	477	0.00667649		CASSLLGRTEVF	1545	0.019517		CGAGQGANTGQLYF	493	0.00627711
CASSPGSGAEQF	8785	0.119074		CSSRQGNYEQYF	8331	0.108934		CASSPGTGANTEVF	13284	0.189704		CASSDALSGQGGSDYTF	7224	0.116514		CASRDNYAEQF	8145	0.10058		CASSQESGDQDTQYF	8090	0.124875		CSADGAGQF	486	0.00625444		CASSQSWDHYAEQF	477	0.00667649		CASGVGTGASGNTLYF	1473	0.0186074		CSARNRAPLF	485	0.00617525
CASSRGDYAEQF	8775	0.118939		CSEEDWGGPETLYF	8326	0.108869		CASSPPGHNERLF	13223	0.188833		CASSQDGRANERLF	7206	0.116224		CASSEKGWNSPLYF	8061	0.0995427		CASGDDWGYEQYF	8071	0.124581		CAWRRTFNNQTQHF	486	0.00625444		CASSQSRDHYVEQF	471	0.00659251		CGATQTNSDYTF	1424	0.0179884		CASGGRQSQNTSYF	484	0.00616252
CASGASTGGGDTQYF	8734	0.118383		CRPGLGVNYAEQF	8304	0.108581		CSVQGSCSDYTF	13137	0.187605		CASSLSEGQNNERLF	7198	0.116095		CSLEIQSSEAGDSALYLCASSLSLRGNSGNTLYF	7623	0.094134		CASSQESSYEQYF	8056	0.12435		CSASGGYNQARHF	484	0.0062287		CSASRGRDTQYF	471	0.00659251		CASSLEGQRDTQYF	1337	0.0168894		CSASRGRNTLYF	481	0.00612432
CASSPGLGSSAETLYF	8727	0.118288		CSAADWGLNYAEQF	8296	0.108476		CASSQETGGKAEQF	13117	0.187319		CASSQEGRGQNTLYF	7141	0.115176		CASSDRSSYEQYF	7496	0.0925657		CASSQGTGDTEVF	8028	0.123918		CSAGDNYGQYF	483	0.00621583		CRPGQSYAEQF	470	0.00657851		CVSSQGQGQVF	1336	0.0168768		CASSQDGVGGRRSAETLYF	480	0.00611159
CASSSRDWGFSYEQYF	8719	0.11818		CASSTRPPREQYF	8292	0.108424		CAWSQLGGAETLYF	13072	0.186676		CAWSLQGNSDYTF	7068	0.113998		CSEGQGNSAETLYF	7410	0.0915037		CASSPGHNYAEQF	7984	0.123238		CSAPRDRNTEVF	483	0.00621583		CASSTTPNSDYAF	464	0.00649453		CASSLEVLSAETLYF	1312	0.0165736		CARSLWYYEQYF	477	0.00607339
CASSDDWAYEQYF	8718	0.118166		CASSLVGRSTEVF	8257	0.107966		CASGDAEGASDYTF	12953	0.184977		CASGVGTGDNYAEQF	7053	0.113756		CASSLWGSSYEQYF	7323	0.0904294		CASSQDWAQDTQYF	7938	0.122528		CSAAGDEQYF	480	0.00617723		CAWSPGTGRDEQYF	464	0.00649453		CGARRGANTGQLYF	1301	0.0164347		CASSFPTGGPYEQYF	472	0.00600973
CRSGTGNTEVF	8711	0.118071		CSTGLGGYEQYF	8233	0.107653		CSASGGDTEVF	12837	0.18332		CASSLGQNEQYF	7045	0.113627		CASTDRAQDTQYF	7068	0.0872805		CASSQEGWGGFAETLYF	7875	0.121556		CSGTANTEVLF	479	0.00616436		CASSLRGWGTSAETLYF	462	0.00646654		CASSLEGQQDAQYF	1300	0.016422		CGGQNQDTQYF	471	0.005997
CSARGDQDTQYF	8696	0.117868		CSARTGGNSPLYF	8220	0.107483		CASSQDPPGGREQYF	12821	0.183092		CSTPGQGAPEVF	7022	0.113256		CGARRLGGSYEQYF	6971	0.0860827		CASSQDSSYNSPLYF	7862	0.121355		CSTPGADAEQF	478	0.00615149		CASPLAGQLYF	461	0.00645254		CASSDARDQAPLF	1282	0.0161947		CSGTGRTSAETLHF	468	0.0059588
CASTVSYNSPLYF	8617	0.116797		CSAEGDLYEQYF	8213	0.107391		CASSQDQQGTGQLYF	12787	0.182606		CASSPPANTEVF	7021	0.11324		CASGGRTGQDTQYF	6888	0.0850577		CASGPRDKYAEQF	7855	0.121247		CSALRDRNTEAF	474	0.00610001		CASSLRDREGEQYF	457	0.00639655		CAGSLEGQQDTQYF	1262	0.015942		CTSSQDGTANSDYTF	459	0.00584421
CASRDRANSDYTF	8562	0.116052		CSAAGTYQDTQYF	8177	0.10692		CASGGTATNSDYTF	12785	0.182578		CASGDAGGRGQDTQYF	6990	0.11274		CASSRGTNSAETLYF	6728	0.0830819		CSAGVSAETLYF	7836	0.120954		CSADPVSTLYF	473	0.00608714		CRGAPYEQYF	456	0.00638256		CASSLFRRDEQYF	1247	0.0157525		CASSLWGYEQYF	458	0.00583148
CSAGTGGDAEQF	8522	0.11551		CASRDQDTQYF	8160	0.106698		CASSQDFDSYEQYF	12706	0.18145		CASSPLDRADTEVF	6978	0.112547		CASSQTGADTEVF	6467	0.0798589		CASSQVAETLYF	7829	0.120846		CTRSATGDSAETLYF	467	0.00600993		CASSQSRDHYAKQF	455	0.00636856		CASRAGTGGALAEQF	1221	0.0154241		CTGSGTGRTSAETLYF	455	0.00579328
CASSDWQGRGTEVF	8498	0.115184		CSADGTANTEVF	8159	0.106685		CASGATGGSDYTF	12649	0.180636		CASGERDKNSDYTF	6949	0.112079		CASSHWRAGQLYF	6098	0.0753023		CASSQDWGSAETLYF	7800	0.120398		CSATGDGQYF	464	0.00597132		CANSQSRDHYAEQF	454	0.00635456		CASSLGGQQDTQYF	1181	0.0149188		CSARSQAPLF	455	0.00579328
CSAPTGGSYEQYF	8495	0.115144		CSAPGGGAETLYF	8157	0.106659		CASGDAGGARSAETLYF	12636	0.18045		CASGDARRRANTEVF	6935	0.111853		CASSLGLGGYEQYF	5810	0.0717458		CASSPGQNTEVF	7799	0.120383		CSGTANTEAF	456	0.00586836		CTYSADNYEQYF	453	0.00634056		CASGDATGGAGNTLYF	1172	0.0148051		CARLGGPSAETLYF	452	0.00575508
CASSPGTGYAEQF	8452	0.114561		CASSFTRDSYEQYF	8128	0.10628		CASGDIWGSSYEQYF	12613	0.180122		CASSEQGYQDTQYF	6914	0.111514		CASSLDGGQDTQYF	5582	0.0689303		CASSQGTGATYEQYF	7724	0.119225		CSALRDRDTEVF	455	0.00585549		CAWSLGTGRDERYF	452	0.00632657		CASSLPPHSSQNTLYF	1159	0.0146409		CGARNQAPLF	452	0.00575508
CASSEFYEQYF	8417	0.114086		CSARDRGRYNSPLYF	8118	0.106149		CSPQGISNERLF	12568	0.179479		CASGDAGQDTQYF	6914	0.111514		CASSLETFYAEQF	5556	0.0686093		CASSQDGRGRDTQYF	7696	0.118793		CSGGTKNTSYF	454	0.00584263		CAGSGQGAEVF	451	0.00631257		CTRSARGGDTQYF	1122	0.0141735		CASSQEGVGGRRGAETLYF	449	0.00571689
CSADVSNERLF	8370	0.113449		CSSRETGGTSDYTF	8115	0.10611		CAWDWGYEQYF	12541	0.179093		CASGDASRSSAETLYF	6874	0.110869		CASSSGHNNYAEQF	5500	0.0679177		CASSQLGGRQNTLYF	7629	0.117759		CAWSRAGANSGSTLYF	451	0.00580402		CASSPGAGNTEVF	451	0.00631257		CASSLEGQQGTQYF	1116	0.0140977		CSARQGANTGQLYF	447	0.00569142
CSSRQNANTEVF	8296	0.112446		CASGDAAGNTEVF	8094	0.105835		CASSQDGTGQLYF	12520	0.178793		CASGDARDWGGDTQYF	6776	0.109289		CASSTGGDTQYF	5480	0.0676708		CASSQGRGYNSPLYF	7573	0.116894		CTRSADPVNTLYF	450	0.00579115		CSASGGQDTQYF	449	0.00628458		CRETVSNERLF	1099	0.0138829		CTYSLTGVNQAPLF	446	0.00567869
CASSPQDTQYF	8287	0.112324		CSAAKNSDYTF	8077	0.105613		CASSHTGGGAETLYF	12507	0.178608		CASSSHYEQYF	6697	0.108014		CASSGRVNSDYTF	5293	0.0653616		CASGDAGNQDTQYF	7560	0.116694		CSDRRGNTEVF	446	0.00573967		CSAVAGGHGRLF	448	0.00627058		CSAPHWRQDTQYF	1097	0.0138577		CAGGDETGGVF	445	0.00566596
CASSPDWGRNTGQLYF	8260	0.111958		CASGETGTGEGDERLF	8058	0.105364		CSADQGADNERLF	12387	0.176894		CASGDLDWGENTLYF	6691	0.107918		CASSLEGRGQDTQYF	5128	0.063324		CANSDVGYEQYF	7537	0.116339		CASSLRGDAEVF	443	0.00570106		CSAVGDGQYF	446	0.00624259		CASSLLVSYEQYF	1076	0.0135924		CASSLWYYEPYF	445	0.00566596
CASSPTVSQNTLYF	8206	0.111226		CASSLDWGYEQYF	8057	0.105351		CASGEAGGADTQYF	12349	0.176352		CASSENSYNSPLYF	6616	0.106708		CASRRDRGGEVF	5123	0.0632623		CASRPGTGGYEQYF	7534	0.116292		CSGHASQNTLYF	442	0.0056882		CSADQYNAGTLYF	446	0.00624259		CASSLRTGGNTLYF	1070	0.0135166		CTSSQEGVGGRRSAETLYF	441	0.00561503
CASGDAGTGGSQNTLYF	8058	0.10922		CSADAPEQYF	8044	0.105181		CASGDRDWGATGQLYF	12328	0.176052		CASSQETGGTTGQLYF	6560	0.105805		CASSENSDYTF	5084	0.0627807		CASSQRGNNNQAPLF	7422	0.114564		CASSQGQDTGQPYF	440	0.00566246		CSAERGQAPLF	443	0.0062006		CTYSETVSNERLF	1064	0.0134408		CSLTGVNQTPLF	438	0.00557683
CASGDANTEVF	8048	0.109085		CSVGQNTEVF	8041	0.105142		CAWSLGLGGHLEQYF	12280	0.175366		CASGGYEQYF	6491	0.104692		CASSPGQYTEVF	5018	0.0619657		CASSPDRAGGTEVF	7399	0.114209		CASSPGNWGEQYF	439	0.00564959		CGADNYEQYF	436	0.00610262		CSVPHWGQDTQYF	1058	0.013365		CASSLW_YEQYF	437	0.0055641
CASSPEQNQDTQYF	8027	0.1088		CSALPGPNSDYTF	8013	0.104776		CASSQVSQNNQAPLF	12110	0.172938		CASGDSGTLNQDTQYF	6338	0.102224		CASGGTLGGENTLYF	4926	0.0608296		CASGTGQLYF	7398	0.114193		CSADPVNTSYF	437	0.00562385		CASSPRDNNQAQHF	436	0.00610262		CTYSAPHWGQDTQYF	1004	0.0126829		CSAGQGANAGQLYF	437	0.0055641
CASSQDGNSPLYF	7996	0.10838		CSADGGQSTEVF	8002	0.104632		CSARGRDQDTQYF	12084	0.172567		CASSLGWGGSSYEQYF	6326	0.102031		CAADSYNSPLYF	4762	0.0588044		CASGDWGYNSPLYF	7397	0.114178		CSAGGAEQF	436	0.00561098		CASSRSSSYNSPLYF	434	0.00607462		CSASHWGQDTQYF	996	0.0125818		CSADEGSHNSPLYF	435	0.00553863
CASVTGGSSAETLYF	7993	0.108339		CSAHNYAEQF	7974	0.104266		CASSQDRDRDDEQYF	12073	0.17241		CASSPGTNERLF	6325	0.102014		CASSFTGPNLSNERLF	4739	0.0585204		CASSQGQGAGQNTLYF	7348	0.113421		CASSINLPSAETLYF	434	0.00558524		CSADQYNAETPYF	434	0.00607462		CSARGGGTQYF	991	0.0125186		CSAGQGADTGQLYF	431	0.0054877
CSGPGQDSGNTLYF	7912	0.107241		CASSLPGVNQDTQYF	7974	0.104266		CREGAGTEVF	12068	0.172339		CASRGLGGEQYF	6304	0.101676		CASSWDGSGNTLYF	4518	0.0557913		CASSQEGISNERLF	7326	0.113082		CASSPGLGGPAEQLF	432	0.0055595		CASGVLGGRGEQYF	433	0.00606063		CSALHWGQDTQYF	965	0.0121902		CSADEGSCNSPLYF	428	0.0054495
CASSPVRYAEQF	7852	0.106428		CSAEAVANTEVF	7956	0.104031		CASGDGRSNTEVF	12021	0.171667		CASSEGNNYAEQF	6295	0.101531		CASSEPTNNNQAPLF	4471	0.055211		CASSQGQGQDTQYF	7239	0.111739		CSADSGGDYAEQF	429	0.0055209		CSAVAGGHEK_SF	427	0.00597665		CSARGGDAQYF	943	0.0119123		CASSQGGGRRSAETLYF	425	0.00541131
CASSPRQGYEQYF	7830	0.10613		CASGDRERNQAPLF	7955	0.104017		CSAGRGGTEVF	11831	0.168954		CASGDARGNYAEQF	6191	0.0998532		CASSPQGRDTGQLYF	4303	0.0531364		CASGDPEDTEVF	7223	0.111492		CASRGSSYVQYF	428	0.00550803		CAWSLGAGDDTQYF	427	0.00597665		CSAPHWGQDT_YF	935	0.0118112		CASSHIRGYEQYF	421	0.00536038
CASGDDRAQDTQYF	7803	0.105764		CSAEPGLYAEQF	7946	0.1039		CSAVGLGGGAEQF	11744	0.167712		CASSQDGGGQDTQYF	6144	0.0990952		CASSFTPRANERLF	4271	0.0527412		CASSQGTVSNERLF	7221	0.111461		CASSQTGYEQYF	427	0.00549516		CTRSAAGTGVAEQF	425	0.00594865		CASSEPRQSNERLF	906	0.0114449		CASSFPDRGPTGQLYF	420	0.00534764
CAWSLRGGAETLYF	7784	0.105507		CSPSGTGGYEQYF	7934	0.103743		CASSQDRVYNSPLYF	11739	0.16764		CASSSGFYEQYF	6111	0.0985629		CASGLKTNSNTEVF	3944	0.0487032		CASGDAGSNTEVF	7198	0.111106		CTRSADRANTGQLYF	427	0.00549516		CASSDWDKEDF	422	0.00590666		CSAPHWEQDTQYF	876	0.0110659		CSADEGSYNSPLHF	419	0.00533491
CAWTTGVNTEVF	7782	0.105479		CASSLGLGAYEQYF	7926	0.103638		CSSYRGGAEQF	11726	0.167455		CASSLAGYNSPLYF	6109	0.0985307		CASSPDNANSDYTF	3662	0.0452209		CASSQDSQNTLYF	7177	0.110782		CASSLRGDTEAF	425	0.00546942		CSAEGAPPF	420	0.00587867		CSAPHWG_DTQYF	862	0.0108891		CAGSQEGVGGRRSAETLYF	417	0.00530945
CSGDREVF	7770	0.105317		CSADGGTNERLF	7896	0.103246		CAWSPQGANSDYTF	11709	0.167212		CASSLQGTEVF	6082	0.0980952		CASSPGTGGRAEQF	3581	0.0442206		CASSQTTSNTEVF	7107	0.109701		CASGQEGQGEQYF	424	0.00545655		CTRSADFGRNTGQLYF	419	0.00586467		CASSPRGGFAETLYF	851	0.0107501		CSGTGRTSAGTLYF	413	0.00525852
CASSPRDRNYAEQF	7761	0.105195		CASSVRDWGSYEQYF	7887	0.103128		CASGDEGAPTGQLYF	11679	0.166783		CASSSPGTGGDAETLYF	6038	0.0973855		CASSRDLGNYAEQF	3529	0.0435785		CASSQDWGGAETLYF	7102	0.109624		CSGAANTEVF	422	0.00543081		CSADQGRTGQLYF	417	0.00583668		CASSLDRGATTGQLYF	835	0.010548		CAGSPTASNERLF	410	0.00522032
CSAEAIQDTQYF	7746	0.104991		CSADGNNNQAQHF	7847	0.102605		CASSQVGDSYEQYF	11628	0.166055		CASRDSANTEVF	6036	0.0973533		CASSLRDRGSDYTF	2837	0.0350332		CASSPNNERLF	7050	0.108821		CSGTASTEVF	420	0.00540507		CASSTTPNSGYTF	412	0.00576669		CSTPHWGQDTQYF	826	0.0104343		CASSQDGTADSDYTF	410	0.00522032
CSGTGGAGTEVF	7746	0.104991		CSADLWGSNAETLYF	7827	0.102344		CASSLQGAETLYF	11586	0.165455		CASRDKNNQAPLF	6027	0.0972081		CASSDRDRNSDYTF	2837	0.0350332		CASGVGQGARAEVF	7049	0.108806		CASSLRGGTEVF	418	0.00537933		CSSRGLFSDERLF	410	0.0057387		CASSPAGAEALYF	785	0.00991638		CASSGQGGTEQF	407	0.00518212
CASSDRRGRPNERLF	7744	0.104964		CASSSGQGGANERLF	7813	0.102161		CASSRDWGNQDTQYF	11476	0.163885		CASGEVGQGNSDYTF	6026	0.097192		CASSLRTNSNTEVF	2801	0.0345887		CASSQGTEVF	6951	0.107293		CTRSADSGGNYAEQF	417	0.00536646		CSADNYEQHF	408	0.00571071		CASSIRNPYEQYF	776	0.00980269		CAGSQDGTANSDYTF	405	0.00515666
CASSQDMGGGEQYF	7720	0.104639		CASSLGGSQNTLYF	7800	0.101991		CASGAGTTNTGQLYF	11448	0.163485		CASGDRENSDYTF	6003	0.096821		CSTGSSLYF	2583	0.0318966		CASSPGLGGPDTQYF	6865	0.105966		CASRPTHNQDTQYF	413	0.00531499		CGPGQNYAEQF	406	0.00568271		CASSHRGRGTEVF	750	0.00947425		CSGTGRTSVETLYF	399	0.00508026
CASGDLGDERLF	7683	0.104138		CASSNPGHPNSDYTF	7791	0.101873		CASSSDNNERLF	11446	0.163456		CASGDGTGENSDYTF	5953	0.0960146		CASSDADRNF	2401	0.0296492		CASGRQGTEVF	6833	0.105472		CGATGDEQYF	410	0.00527638		CASSDWDKEVLF	405	0.00566872		CSETGSNERLF	746	0.00942372		CSLTGVNQALLF	399	0.00508026
CASSLGAANTGQLYF	7673	0.104002		CSAPWGGYAEQF	7770	0.101598		CASSPDRESAETLYF	11427	0.163185		CASGAGQGDTLYF	5857	0.0944662		CASSLDRASTEVF	2379	0.0293775		CASGQPNQAPLF	6795	0.104885		CAGGAAGGNQDTQYF	405	0.00521203		CTRSANSYNSPLYF	403	0.00564072		CSAPYWGQDTQYF	742	0.00937319		CSLTGDYNNQAPLF	397	0.0050548
CASSSGVNSPLYF	7665	0.103894		CSADRNSGNTLYF	7746	0.101285		CAWSLGVGNTLYF	11407	0.162899		CAWSLGPGQNNSPLYF	5803	0.0935952		CSADQTGGSEQYF	2247	0.0277475		CASSEGLGGAFYAEQF	6786	0.104746		CAGSQGQDTGQLYF	404	0.00519916		CASSDRDKEVF	401	0.00561273		CAWSLGAFSNE_LF	725	0.00915844		CSLTGVN_APLF	389	0.00495294
CSAGTTNTEVF	7665	0.103894		CSADNYEQYF	7671	0.100304		CSGGTISNERLF	11403	0.162842		CASGDAGGVNQDTQYF	5736	0.0925146		CASSRDWGSQNTLYF	2051	0.0253271		CASGDAGDKYTGQLYF	6744	0.104098		CTRSASGTGAEQF	403	0.0051863		CASS_SRDHYAEQF	399	0.00558474		CASRGTGPNSDYTF	722	0.00912055		CTSSQGGGRRSAETLYF	385	0.00490201
CSDRNSGNTLYF	7617	0.103243		CSGTQNTEVF	7658	0.100134		CSRVQDTQYF	11321	0.161671		CASSQEWGKDTQYF	5631	0.0908211		CASSLKANSNTEVF	2022	0.024969		CASSQAGQHNNQAPLF	6743	0.104083		CSATVNTEVLF	398	0.00512195		CRPGRNYAEQF	393	0.00550075		CSETVSTERLF	705	0.0089058		CSVSRGQNTLYF	385	0.00490201
CASRQRDRGRGQNTLYF	7608	0.103121		CASSLSRGPNSDYTF	7655	0.100095		CASGGTGGKDTQYF	11293	0.161271		CASGEDTPNTGQLYF	5624	0.0907082		CASSSYRGIGNTLYF	1996	0.024648		CASGDGGALEQYF	6707	0.103527		CSALRDRNAEVF	398	0.00512195		CRLGGEALYF	391	0.00547276		CSAPHWGQDIQYF	694	0.00876684		CSASRGQNTLHF	379	0.00482561
CASSRGTGAYAEQF	7600	0.103013		CSADFWGDGQNTLYF	7648	0.100003		CAWSWGISNERLF	11268	0.160914		CASSAQGSSAETLYF	5544	0.0894179		CASSLKTNSNTEAF	1941	0.0239688		CASSQGGAGNTEVF	6629	0.102323		CSADRQGGNSPLYF	394	0.00507047		CSAGNYEQYF	390	0.00545876		CSKTVSNERLF	688	0.00869105		CASSQQGAYNSPPYF	378	0.00481288
CASSPGLHYEQYF	7594	0.102931		CASSLGQTANTEVF	7633	0.0998071		CASSPDGTGAYEQYF	11261	0.160814		CASGGQGAEVF	5456	0.0879986		CASSLDRANTEVLF	1934	0.0238823		CASSLGTGDAEQF	6622	0.102215		CSALRGRNTEVF	392	0.00504473		CSAAGTGVAEQLF	390	0.00545876		CNAPHWGQDTQYF	686	0.00866578		CSADEGSYNPPLYF	376	0.00478741
CASSSQGASAETLYF	7589	0.102863		CASSPDSANTEVF	7622	0.0996632		CSADNGDSNERLF	11107	0.158615		CASSDGQQYF	5375	0.0866921		CASSLKTNSSTEVF	1857	0.0229315		CASSQEGGGYAEQF	6617	0.102138		CASSLPGGDNQAQHF	392	0.00504473		CAWSLGTGRDEQCF	386	0.00540278		CASGDNSGNTLYF	676	0.00853946		CSLTEVNQAPLF	372	0.00473648
CASGDSYEQYF	7582	0.102769		CSSRAGPSYEQYF	7591	0.0992579		CAWSPGGMNQAQHF	11049	0.157787		CASSQGGNTEVF	5320	0.0858051		CASSLKTNSNTEVLF	1844	0.022771		CASGPGGAEVF	6590	0.101721		CSAEGADQDTQYF	391	0.00503186		CASSGISQDTQYF	383	0.00536079		CSETVFNERLF	672	0.00848893		CASGGGQSQNTLYF	372	0.00473648
CASSLHTGGYEQYF	7572	0.102633		CASRDTPNTEVF	7589	0.0992317		CASGDESSQNTLYF	11038	0.15763		CASGDLSTNSDYTF	5290	0.0853212		CASRQINTEVF	1829	0.0225857		CASSQDGDNSPLYF	6589	0.101706		CTSGAAGGNQDTQYF	391	0.00503186		CTRSAARETYAEQF	382	0.00534679		CASSPAGAETPYF	664	0.00838787		CSARLGGRRSAETLYF	370	0.00471102
CSADQSNSGNTLYF	7548	0.102308		CSGQGVSNTEVF	7580	0.0991141		CSAENNQDTQYF	11005	0.157158		CASSSQGEQYF	5262	0.0848696		CASRTGGTGQLYF	1777	0.0219436		CASSPTRGEGNSPLYF	6589	0.101706		CAGSQDRGDQDTQYF	390	0.005019		CASGQSPGTVYEQYF	381	0.00533279		CSEIVSNERLF	631	0.007971		CASSQGGVGGRRSAETLYF	366	0.00466009
CASSLGVEQYF	7518	0.101901		CSAPTGASNTEVF	7572	0.0990094		CASGDAFGGISNERLF	10980	0.156801		CASSDAPGDQNTLYF	5260	0.0848373		CASSTHEGAYEQYF	1696	0.0209434		CASSPYRGQAPLF	6530	0.100795		CASSPGDWGEPYF	389	0.00500613		CSAGTVYAEQLF	379	0.0053048		CGARGGDTQYF	618	0.00780678		CASS_DSYAEQF	365	0.00464736
CASSLGLGVYAEQF	7506	0.101738		CSAEGGDNYAEQF	7566	0.098931		CAWSRGGDTEVF	10875	0.155302		CASSQEGQGNEQYF	5221	0.0842083		CAGSLKTNSNTEVF	1696	0.0209434		CASSQDGKGAAETLYF	6511	0.100502		CSAGRATEVF	385	0.00495465		CASSQSKDHYAEQF	379	0.0053048		CSETVSNKRLF	612	0.00773099		CASALWYYEQYF	361	0.00459643
CSSRGGANSDYTF	7504	0.101711		CRAGTGGAGEQYF	7563	0.0988918		CASSQDYHWGYEQYF	10775	0.153874		CASSYPGHQDTQYF	5167	0.0833374		CSAGQGNSAETLYF	1687	0.0208322		CASSQDSGYEQYF	6336	0.0978004		CSAGDNYERYF	383	0.00492891		CSDGFSNERLF	378	0.0052908		CVSSLEGQQDTQYF	612	0.00773099		CASSQDGTANSDYAF	361	0.00459643
CASSVDRGWRTNSDYTF	7465	0.101183		CSARTGGLNTGQLYF	7550	0.0987218		CASGDARGQDTQYF	10722	0.153117		CASGDARDWGNYAEQF	5081	0.0819503		CASSRNNQAPLF	1567	0.0193504		CASGEKINSDYTF	6312	0.0974299		CAYRGPNSDYTF	381	0.00490317		CSANSYNSPPYF	377	0.00527681		CASSLEGQQDTRYF	603	0.0076173		CSADEGSYDSPLYF	355	0.00452003
CASRQGNEQYF	7447	0.100939		CSADRGRTEVF	7542	0.0986172		CASGISNERLF	10630	0.151803		CASSDGDWAETLYF	5043	0.0813374		CASSAGTNNNQAPLF	1567	0.0193504		CASSAGTTNTEVF	6223	0.0960562		CASSQGQDAGQLYF	379	0.00487743		CAWSLGTGGDTQYF	377	0.00527681		CNETVSNERLF	595	0.00751624		CASSQEGAGGRRSAETLYF	348	0.0044309
CASSWDSQDTQYF	7435	0.100776		CSADKGANSDYTF	7540	0.098591		CASSQDESGNSYNSPLYF	10596	0.151318		CASRGQGQNTLYF	5038	0.0812567		CASSLKTNSNAEVF	1548	0.0191158		CASSPTGGRAPLYF	6161	0.0950991		CASSQGADTLYF	376	0.00483883		CASSTTPNSDYPF	376	0.00526281		CASGLEGQQDTQYF	593	0.00749098		CTSSHIWGYEQYF	347	0.00441817
CAWSLETGEQYF	7432	0.100735		CSADARGANTEVF	7530	0.0984603		CASGDATGNERLF	10526	0.150318		CASSLEGTNERLF	5030	0.0811277		CASSLDRADTEVF	1452	0.0179303		CASSQDWWSSQNTLYF	6077	0.0938025		CSAVSQNTSYF	374	0.00481309		CASSQSPGTVYGQYF	376	0.00526281		CSAGGGDTQYF	593	0.00749098		CSARLGGPSAETLHF	345	0.00439271
CASSLSYEQYF	7426	0.100654		CSADRVDTEVF	7513	0.098238		CASGGPRDKYAEQF	10474	0.149575		CASSPPGQGDTQYF	5008	0.0807729		CASGDAYTSQNTLYF	1445	0.0178438		CASGDATENTLYF	6076	0.0937871		CATVNTEVF	374	0.00481309		CASSPGTGNTEVLF	376	0.00526281		CASGADRVNYAE_F	570	0.00720043		CSGQNQDTQCF	338	0.00430358
CASSDGTNNSPLYF	7408	0.10041		CASSLRGGDERLF	7509	0.0981857		CASHRAETLYF	10390	0.148376		CASRSGTGTEVF	5005	0.0807245		CASSLKTSSNTEVF	1429	0.0176463		CASSVDSQDTQYF	6028	0.0930462		CTRSGHTSQNTLYF	370	0.00476161		CASSTTPNPDYTF	376	0.00526281		CASRRTGPNSDCTF	558	0.00704884		CSARPGGPSAETLYF	337	0.00429085
CSARDRVSNERLF	7319	0.0992038		CASSARLGAEQF	7490	0.0979372		CASSQEVF	10303	0.147133		CASRTGGAQDTQYF	4973	0.0802084		CASSLKTDSNTEVF	1404	0.0173375		CASSGGGGLEQYF	5946	0.0917805		CSTEGANQDTQYF	369	0.00474874		CASSLRDGEDEQYF	375	0.00524881		CAGRRTGPNSDYTF	552	0.00697305		CSARLGGPSAGTLYF	335	0.00426538
CASSQDLRGSQNTLYF	7316	0.0991631		CASGDGTTQNTLYF	7471	0.0976888		CAWSLDWGGIDTQYF	10297	0.147048		CASSGTGGEQYF	4970	0.08016		CSAGHNNYAEQSF	1324	0.0163497		CASGDGTAGSDYTF	5895	0.0909933		CSATGGEQYF	368	0.00473587		CTSSGINQDTQYF	375	0.00524881		CASSLEGQQDTQHF	533	0.00673304		CAGSHIWGYEQYF	335	0.00426538
CASSPGVEQYF	7265	0.0984719		CPGSAETLYF	7466	0.0976234		CASSPRGGDGQLYF	10170	0.145234		CASRPGQNTGQLYF	4949	0.0798213		CASSPKTNSNTEVF	1282	0.015831		CASGDDQQDTQYF	5848	0.0902678		CSADSGGNYAGQF	368	0.00473587		CSAEWGQAPPF	374	0.00523482		CAPHWGQDTQYF	532	0.0067204		CASSLWYYKQYF	335	0.00426538
CASDRGESAETLYF	7258	0.098377		CASSLSTRESNSDYTF	7461	0.097558		CAWSLRGASSGNTLYF	10153	0.144991		CASSQRTDYAEQF	4935	0.0795955		CASGLVGTDTEVF	1258	0.0155346		CASGEDPNTEVF	5845	0.0902215		CSADARDTSYF	367	0.004723		CSGGQTNTGVF	371	0.00519282		CSVTVSNERLF	531	0.00670777		CASGHIWGYEQYF	331	0.00421445
CASSLRHANSDYTF	7232	0.0980246		CASNLVGGRTEVF	7437	0.0972442		CASGDAPYEQYF	10063	0.143706		CASGVRDTEVF	4926	0.0794503		CASSLDSTGGAGQDTQYF	1211	0.0149543		CASSQDRGVSAETLYF	5793	0.0894188		CGADVGGLYAEQF	366	0.00471013		CSAAREAYAEQF	370	0.00517883		CSAPHWGHDTQYF	529	0.00668251		CAGSQQGAYNSPLYF	330	0.00420172
CASRGDRTNTEVF	7222	0.097889		CSETVSNERLF	7430	0.0971527		CSSRDRDWGDEQYF	10049	0.143506		CASSWTASAETLYF	4921	0.0793697		CSVGQGDSAETLYF	1204	0.0148678		CASSHWGGSQNTLYF	5790	0.0893725		CARYNSPLYF	361	0.00464579		CSPRGLFSNERLF	369	0.00516483		CAGSLLGQGYAEQF	522	0.00659408		CSADDGSYNSPLYF	330	0.00420172
CASSQDRANTEVF	7204	0.0976451		CSARSYEQYF	7421	0.097035		CASSDRTGGNYAEQF	10031	0.143249		CASSDAKDNQDTQYF	4907	0.0791439		CASRRDYAEQF	1176	0.014522		CASSQIPGTNTGQLYF	5789	0.0893571		CSGTADTEVF	359	0.00462005		CSAGGAPLF	368	0.00515083		CASGDARNTGQPYF	521	0.00658145		CSARVNTLYF	328	0.00417625
CASWDRNYAEQF	7177	0.0972791		CRGGIEQYF	7421	0.097035		CASSDTGGEQYF	9941	0.141964		CASGVSGTEQF	4883	0.0787568		CASSLKTNSNTEVSF	1175	0.0145097		CAIRDREDERLF	5744	0.0886625		CTRSADGAEQF	356	0.00458144		CASSTRSQNTSYF	367	0.00513684		CSETISNERLF	520	0.00656881		CASSQDGTASSDYTF	326	0.00415079
CASSLRQGANTEVF	7174	0.0972384		CASSLTGGSQNTLYF	7420	0.0970219		CASSQDPGGTRSSYEQYF	9929	0.141792		CASSWGDAETLYF	4861	0.0784019		CASSLDGANTEVF	1168	0.0144233		CASSQTGNNQAPLF	5710	0.0881377		CSGTANAEVF	354	0.0045557		CSSGGLFSNERLF	366	0.00512284		CASRRAGPNSDYTF	508	0.00641723		CSAGVNTGQLYF	324	0.00412532
CSADEGALSGNTLYF	7154	0.0969673		CASSATSNTGQLYF	7395	0.096695		CAWSLDREVF	9920	0.141664		CARLGVQNTLYF	4833	0.0779503		CASSRQGANTEVF	1166	0.0143986		CASSQDPGRVF	5706	0.0880759		CSGTGGNAEVF	354	0.0045557		CSSRGLFSNERLLF	365	0.00510884		CSAPHWGQDTLYF	498	0.0062909		CTYSGTGRTSAETLYF	324	0.00412532
CASSPDRGRAEQF	7118	0.0964794		CSAEGFQDTQYF	7394	0.096682		CSATGDTGQLYF	9897	0.141335		CASRGQGNSGNTLYF	4789	0.0772407		CASSLTGVGAEQF	1161	0.0143368		CASSQDRGRDTQYF	5704	0.088045		CSAGDSYEQYF	352	0.00452997		CAWSLRTGRDEQYF	364	0.00509485		CASGDARNTGQRYF	495	0.00625301		CASGDATGGVF	320	0.00407439
CASSGGGGDTQYF	7112	0.0963981		CASSVAGLGNTLYF	7392	0.0966558		CASSGLLQDTQYF	9617	0.137337		CASSLGTGNHSPLYF	4788	0.0772245		CSAGYNNYAEQF	1142	0.0141022		CASRRTGGVTEVF	5696	0.0879216		CTRSGGTGGPGQLYF	351	0.0045171		CGASRGQDTQYF	362	0.00506685		CASSLEGQQDTQCF	495	0.00625301		CASGDARDRDEQYF	319	0.00406166
CASSLLGPSAETLYF	7097	0.0961947		CSAGDTEVF	7391	0.0966427		CAWSPGTANSDYTF	9525	0.136023		CASGDALGLGDNQDTQYF	4759	0.0767568		CASSLETNSNTEVF	1115	0.0137688		CASSHQVSNERLF	5684	0.0877363		CSAGRDISYNSPPYF	351	0.0045171		CSADPAANTGVF	362	0.00506685		CASS_ESRVQDTQYF	488	0.00616458		CSLTGVNQVPLF	316	0.00402346
CASGDPRANTEVF	7080	0.0959643		CASSDPDQDTQYF	7354	0.0961589		CASGDARGAENSDYTF	9464	0.135152		CASSEQGANSDYTF	4748	0.0765794		CASGGSYNSPLYF	1104	0.0136329		CASSQTGGNYAEQF	5665	0.0874431		CASSQGQDTGQLHF	349	0.00449136		CRLRGETLYF	361	0.00505286		CASSLGRGDTQYF	481	0.00607615		CTYSAGVNTLYF	316	0.00402346
CASSPDWGNYEQYF	7079	0.0959508		CSEDSGNTLYF	7319	0.0957013		CAWSPTGSGNTLYF	9425	0.134595		CASGDAGGGSAETLYF	4686	0.0755794		CASSDGDRNERLF	1065	0.0131513		CASSDKNTEVF	5625	0.0868256		CSGTGGSTEVF	348	0.00447849		CASSGVNQDTQYF	360	0.00503886		CASSDGGNYAERF	481	0.00607615		CASSQDGTANPDYTF	315	0.00401073
CASSLSWTGGSQNTLYF	7002	0.0949071		CASSPDRGPGNTLYF	7318	0.0956882		CASGEAPRDKNTEVF	9405	0.134309		CASSDVGYEQYF	4677	0.0754343		CASSLTGGDTQYF	1047	0.0129291		CASSDARTGGRDTQYF	5471	0.0844485		CGGTANTEVF	346	0.00445275		CSADNCEQYF	359	0.00502486		CASSLAGVYAEQF	480	0.00606352		CASSQDGTANSDHTF	312	0.00397254
CSRDSNSGNTLYF	6988	0.0947173		CRQYSDYTF	7314	0.0956359		CASSEAGWNTLYF	9144	0.130582		CASSKPTQNTLYF	4673	0.0753697		CTRSVGQGNSAETLYF	1008	0.0124475		CASSPTGGGSNERLF	5470	0.0844331		CASSQDPAGGYAEQF	345	0.00443988		CSADNYERYF	358	0.00501087		CASSRHYNYAEQF	475	0.00600036		CGSSGLGGTEQF	310	0.00394707
CSVDNSYEQYF	6986	0.0946902		CSAGGPYAEQF	7301	0.0954659		CASSDAQNQNTLYF	9134	0.130439		CASSDAWGGNYAEQF	4628	0.0746439		CASSLKTNPNTEVF	1007	0.0124351		CASSDAGQDTQYF	5424	0.0837231		CANMSQGRTLYCTCSATGDEQYF	344	0.00442701		CASSQSRDHYAEQYF	357	0.00499687		CASSISWGGDAETLYF	475	0.00600036		CAGSDARDRDEQYF	309	0.00393434
CSAINQDTQYF	6974	0.0945276		CSRDGTEVF	7291	0.0953352		CASSHHRGRDTEVF	9100	0.129954		CASSQDPSANTEVF	4616	0.0744504		CSGDNSQNTSYF	1003	0.0123857		CASGDTYEQYF	5404	0.0834143		CASGTGAEQF	342	0.00440127		CASPLRDWGTSAETLYF	357	0.00499687		CSATVSNERLF	471	0.00594983		CSARLGGPGAETLYF	307	0.00390887
CASTQGAGNTLYF	6974	0.0945276		CSAEVAEQF	7286	0.0952698		CSATGTGYNSPLYF	8992	0.128411		CASSLVGTGDAEQF	4565	0.0736278		CASSLKTNSDTEVF	990	0.0122252		CASSRDRGHAEQF	5403	0.0833989		CSATGDERYF	342	0.00440127		CTIEIQSSKLTDSAVYFRASSQSGDNNQDTQYF	356	0.00498287		CTSSLEGQQDTQYF	457	0.00577298		CSAGQGANTRQLYF	304	0.00387068
CASSQERGLGGYEQYF	6926	0.093877		CSADIQGNAETLYF	7264	0.0949821		CRRQGASYNSPLYF	8851	0.126398		CASSLSTLNQDTQYF	4559	0.0735311		CVSSLKTNSNTEVF	974	0.0120276		CASSQDLGAYEQYF	5383	0.0830902		CTRSGTGGNTEVF	340	0.00437553		CTRSAEWGQAPLF	352	0.00492688		CASRRTGPNSDYAF	456	0.00576035		CASGGRQGQNTLYF	303	0.00385794
CASSPGQGNTEVF	6921	0.0938092		CASGDARGNYAEQF	7263	0.094969		CASGDSGRNNQAPLF	8660	0.12367		CASSADRANYAEQF	4558	0.0735149		CIPGLGGQDTQYF	952	0.0117559		CASSPGTGYNSPLYF	5364	0.0827969		CARRRTFNNQAQHF	339	0.00436267		CARSLGTGDDTQYF	352	0.00492688		CASRRTGPNSDHTF	452	0.00570982		CASGQDGTANSDYTF	302	0.00384521
CASSSGQGNSGNTLYF	6915	0.0937279		CSADPGGEGTQYF	7245	0.0947337		CASSQDGGASYEQYF	8603	0.122856		CASHRGRVYEQYF	4545	0.0733053		CSVGRGNSAETLYF	930	0.0114843		CASSDWVSYEQYF	5320	0.0821177		CSADVGGLYAEQLF	338	0.0043498		CRPGQNYAVQF	348	0.0048709		CASSYRGRNSPLYF	446	0.00563402		CASGGRQSQSTLYF	301	0.00383248
CASSLVQDRYNQAPLF	6906	0.0936059		CASSGQGANTEVF	7237	0.0946291		CASGSTGYEQYF	8588	0.122642		CASSLATNSDYTF	4518	0.0728698		CASSLKTNSNTGVF	923	0.0113978		CASSPTGDERLF	5294	0.0817164		CSADRANTGQPYF	337	0.00433693		CAWSHWGSYAEQF	347	0.0048569		CASSLRGRGTEAF	436	0.0055077		CASSQEGVGGRSYEQYF	299	0.00380701
CASGDGTSAETLYF	6855	0.0929146		CASSLHSNSDYTF	7230	0.0945375		CASGDAGRGSAETLYF	8530	0.121814		CASSGLGVQDTQYF	4488	0.0723859		CASSLGRANTEVF	893	0.0110274		CASSLDRDINERLF	5281	0.0815158		CSADWGPYEQYF	337	0.00433693		CASSLTGVIPNERLF	347	0.0048569		CASSLRGRGTEVLF	435	0.00549507		CAGGGRQSQNTLYF	299	0.00380701
CASSQRGGAGEQYF	6848	0.0928197		CSGSQNTLYF	7229	0.0945245		CASGDADRNTLYF	8525	0.121742		CASGDAGAETLYF	4443	0.0716601		CSGDNSRNTLYF	851	0.0105087		CASSHRDWGGAYEQYF	5210	0.0804198		CGAGDNYEQYF	336	0.00432406		CSAVAGGHERLLF	347	0.0048569		CANSLEGQQDTQYF	434	0.00548243		CSASRGQNTLCF	297	0.00378155
CASSYPPRAISNERLF	6799	0.0921556		CSAAQSSYEQYF	7226	0.0944852		CASSESGETLYF	8515	0.1216		CASSPQGANYAEQF	4410	0.0711279		CTRSADQGGDTGQLYF	851	0.0105087		CASSDVGYERYF	5186	0.0800494		CSAGDDYEQYF	335	0.00431119		CASSQRQGAEQSF	346	0.0048429		CVSSQDTINTGQLYF	434	0.00548243		CASGGRQSQNALYF	295	0.00375608
CASSSTGGSDYTF	6797	0.0921285		CSADQGWGNTLYF	7225	0.0944722		CSEQGAETLYF	8456	0.120757		CAWSHRGNSDYTF	4410	0.0711279		CASSLDRANTEAF	848	0.0104717		CASSDMGQNTLYF	5140	0.0793393		CLAGGYAERF	334	0.00429832		CAGSLAGQLYF	345	0.00482891		CASSLRGPNTEVF	431	0.00544454		CSAGQGTNTGQLYF	294	0.00374335
CASSLDRVNSDYTF	6746	0.0914372		CASTGTANSDYTF	7215	0.0943414		CSGTISNERLF	8448	0.120643		CASSLDGGPDTQYF	4315	0.0695956		CSVGQGNSAETPYF	848	0.0104717		CASGDGGQGAERLF	5136	0.0792776		CSADGAEQLF	333	0.00428545		CSAGWGQAPLF	345	0.00482891		CRAPHWGQDTQYF	426	0.00538138		CSADEGAYNSPLYF	294	0.00374335
CASSPGDTEVF	6655	0.0902038		CSADKDYEQYF	7186	0.0939622		CASSDRDWGYEQYF	8391	0.119829		CASSRQGSNERLF	4311	0.0695311		CSVGQGSSAETLYF	826	0.0102		CASGVPTGGAVETLYF	5089	0.0785521		CSADVGGPYAEQF	333	0.00428545		CASSRQDANSDYTF	344	0.00481491		CSAPHWGQNTQYF	418	0.00528032		CSLTRVNQAPLF	294	0.00374335
CASSTTGGAETLYF	6654	0.0901902		CASSSGQGARDEQYF	7181	0.0938968		CASSDAGTGAYEQYF	8362	0.119415		CASGDWGADYAEQF	4283	0.0690795		CASRPGQTEVSF	814	0.0100518		CAGSDVGYEQYF	5074	0.0783206		CASSPGDWGAQYF	331	0.00425971		CASSTTPNSDHTF	343	0.00480091		CSETVSNDRLF	417	0.00526768		CSARLGGPSAETLCF	293	0.00373062
CSGRGGTEVF	6648	0.0901089		CASSSGRDAETLYF	7157	0.093583		CASSLGTSSGNTLYF	8307	0.118629		CASSPTSAETLYF	4277	0.0689827		CSGDNSQSTLYF	801	0.00989129		CASSGLGGLNTLYF	5045	0.0778729		CSAAGDSAETLYF	330	0.00424684		CRDNYGQYF	340	0.00475892		CTSSETVSNERLF	412	0.00520452		CASSAGTDYEQYF	292	0.00371789
CASSHSGTGGHEQYF	6598	0.0894312		CSARGREQYF	7149	0.0934784		CASSDAPPGGDEQYF	8293	0.118429		CASSLSGDGNTLYF	4241	0.0684021		CASSDNSSGNTLYF	786	0.00970606		CASSDAGANSPLYF	5029	0.077626		CDSRGSSYVQYF	330	0.00424684		CSADRGAETLYF	339	0.00474493		CASSSEGQQDTQYF	411	0.00519189		CSADEGSYNSPLCF	292	0.00371789
CASSFSQGGEQYF	6556	0.0888619		CSAGEGSDYTF	7146	0.0934392		CASSPTENTLYF	8261	0.117972		CASSRGVSQNTLYF	4218	0.0680311		CSAAQNTEAF	781	0.00964432		CASSGTGDYEQYF	5014	0.0773944		CSADVGGLYAEQSF	326	0.00419537		CARSHWGNYAEQF	338	0.00473093		CSAPHWGQDTPYF	411	0.00519189		CASGGRQSQDTLYF	291	0.00370515
CASGDRQYEQYF	6528	0.0884824		CASSPGTTNTEVF	7126	0.0931777		CAWSPGQGAGNTLYF	8228	0.117501		CASSSRDWGVYEQYF	4217	0.068015		CTRSGDNSQNTLYF	777	0.00959492		CASRDRVGSDYTF	5000	0.0771783		CASRPLGGYAEQLF	324	0.00416963		CGDNYEQYF	335	0.00468894		CASSLRGRGAEVF	409	0.00516663		CSGTGRTSTETLYF	288	0.00366696
CASSLGGQYEQYF	6517	0.0883333		CASSDRRTGSAETLYF	7114	0.0930208		CASSDLTNSDYTF	8203	0.117144		CASSQGGREQYF	4211	0.0679182		CASTGGPYAGQF	775	0.00957023		CASGGTGGTGQLYF	4956	0.0764992		CSADRASTGQLYF	321	0.00413102		CSSRGLFSSERLF	335	0.00468894		CASRRTGPSSDYTF	395	0.00498977		CASSLWSYEQYF	288	0.00366696
CASSDRGGQDTQYF	6495	0.0880351		CASSELGGRGEQYF	7113	0.0930077		CASSDAKGGSQNTLYF	8068	0.115216		CASRRGDNQDTQYF	4198	0.0677086		CAGSLDRANTEVF	771	0.00952083		CASSETGGYAEQF	4927	0.0760515		CASRPDRGQNTLYF	321	0.00413102		CSGDREVLF	334	0.00467494		CASGDARSTGQLYF	391	0.00493924		CASSRDGTANSDYTF	285	0.00362876
CSAETGTSAETLYF	6492	0.0879944		CSATRWGVYAEQF	7094	0.0927592		CASRLTEGQYEQYF	8040	0.114816		CASSLSGSQAPLF	4194	0.0676441		CASGGERVGAETLYF	764	0.00943439		CASGEHRGNNQAPLF	4916	0.0758817		CASSQGGDQDTQCF	321	0.00413102		CASSGQGAEVLF	332	0.00464695		CTSSAPHWGQDTQYF	389	0.00491398		CSRQNQDTQYF	285	0.00362876
CASGDRERQDTQYF	6488	0.0879402		CASTPRDRVF	7063	0.0923539		CASSQDWGYAEQF	7965	0.113745		CASSVTINYEQYF	4175	0.0673376		CSARDSNYAGQF	761	0.00939735		CASGVSGTGENTLYF	4900	0.0756348		CASGAAGGNQDTRYF	319	0.00410528		CSAARETYAEQLF	332	0.00464695		CASSLERQQDTQYF	383	0.00483818		CTSSQGGGRSYKQYF	285	0.00362876
CASSLLDSYAEQF	6474	0.0877504		CSADFHKDTQYF	7053	0.0922231		CASSEGNAEQF	7938	0.11336		CASSLMDNQDTQYF	4154	0.0669989		CSGGNSQNTLYF	758	0.0093603		CASSFPGREVF	4899	0.0756193		CSADSGGNYAEQLF	318	0.00409241		CRLGGETPYF	330	0.00461895		CSAPHGGQDTQYF	377	0.00476239		CASGDETGGVSF	283	0.00360329
CASSDARGLGAETLYF	6449	0.0874116		CSADEDSGNTLYF	7049	0.0921708		CASSDAGDNQAPLF	7890	0.112674		CASRLTGDGNTLYF	4146	0.0668699		CSGDNSQNALYF	731	0.00902689		CASSEGWGASAETLYF	4882	0.0753569		CSALRDRNTEVSF	317	0.00407954		CSANSYSSPLYF	329	0.00460496		CASSDAGTGDAERF	374	0.00472449		CASGGRRSQNTLYF	283	0.00360329
CSADRQGAYTEVF	6438	0.0872625		CASRWTVSNERLF	7022	0.0918178		CAWSPQSQNTLYF	7689	0.109804		CASGETGGGNQAPLF	4141	0.0667892		CSAGTGVSQAPLF	715	0.00882931		CASSDLGSSYEQYF	4877	0.0752797		CSGHTSQNALYF	316	0.00406667		CAWSLGTGRDEQHF	329	0.00460496		CASSQGQGRVF	374	0.00472449		CSASQGQNTLYF	279	0.00355236
CSGTANTGQLYF	6436	0.0872354		CASSQGGGQDTQYF	7020	0.0917916		CASSDEGYEQYF	7666	0.109475		CASSLAVSQNTLYF	4123	0.0664989		CASSPGATEVF	693	0.00855764		CASSDGTIYNSPLYF	4866	0.07511		CTRSAGRDISYNSPLYF	315	0.0040538		CTRRLGGETLYF	328	0.00459096		CASRGSGSDYTF	372	0.00469923		CSAGVTTLYF	279	0.00355236
CASSSGTGGAEVF	6430	0.087154		CTYSAGLGEQNTLYF	7018	0.0917655		CASSDMGQGNSDYTF	7617	0.108776		CASSLDRAQAPLF	4087	0.0659183		CASSLDRANAEVF	688	0.00849589		CASGDAWTGDTEVF	4856	0.0749556		CSAGARDTLYF	313	0.00402807		CASSLRDWGASAETLYF	328	0.00459096		CASGRTGPNSDYTF	371	0.0046866		CASSQRGAYNSPLYF	278	0.00353963
CASSLLGRGNERLF	6428	0.0871269		CSGQGSYNSPLYF	7016	0.0917393		CASSDDWGGEAETLYF	7558	0.107933		CASSLETGGGEQYF	4065	0.0655634		CSGDDSQNTLYF	683	0.00843415		CASSPDWEEQYF	4851	0.0748784		CSGTGGNTEVLF	313	0.00402807		CAWGHWGNYAEQF	326	0.00456297		CSERVSNERLF	371	0.0046866		CASSQQDAQYF	277	0.0035269
CASSTTGQNTLYF	6419	0.0870049		CSAVYEQYF	7006	0.0916086		CASSQARGGAETLYF	7480	0.106819		CASSDRWGANTGQLYF	4017	0.0647893		CASSLDRANTEVSF	680	0.0083971		CASSRDWGNYEQYF	4830	0.0745543		CSGHTGQNTLYF	312	0.0040152		CTRSAGTVYAEQF	325	0.00454897		CASRRTGPNPDYTF	366	0.00462344		CAGGDTNSDYTF	277	0.0035269
CASSLAGGAGNTLYF	6408	0.0868558		CRGQGAGGNTLYF	6963	0.0910463		CAWSWTGGSYEQYF	7460	0.106534		CASSLGSGGGTEVF	4004	0.0645796		CTSSLKTNSNTEVF	652	0.00805134		CASSDTVANTEVF	4813	0.0742919		CSALRDRNTGVF	311	0.00400233		CTRSDRFSNERLF	321	0.00449298		CASSQGSRTGAERLF	365	0.0046108		CTSSQQGAYNSPLYF	277	0.0035269
CSGTGGSAETLYF	6382	0.0865034		CASSPDRVNERLF	6962	0.0910333		CASGERLGREQYF	7415	0.105891		CASSDAGGSEQYF	4001	0.0645312		CSGDNSQNTLCF	651	0.00803899		CASSDVSYEQYF	4808	0.0742147		CSADYNSYNSPPYF	311	0.00400233		CRGTPYGQYF	321	0.00449298		CRTGGQDAQYF	365	0.0046108		CASSHIWGYGQYF	277	0.0035269
CASGVAGTGEYEQYF	6350	0.0860697		CSAGNQNTLYF	6954	0.0909286		CASGGGYAEQF	7309	0.104377		CASGDAGQISNERLF	3984	0.064257		CASSSGTGGAREQYF	647	0.0079896		CASSQDGEDTQYF	4805	0.0741684		CSAGDNYEQCF	309	0.00397659		CASRQSRDHYAEQF	320	0.00447899		CASSLEGQQDT_YF	362	0.00457291		CASSLWYYEQF	274	0.0034887
CASSLGQGDTEVF	6315	0.0855953		CASSQDRGQGETLYF	6949	0.0908633		CASSDQLGGEDTQYF	7296	0.104191		CASSLGSTEVF	3963	0.0639183		CQGTGNTEVF	643	0.0079402		CASRLGAEQYF	4802	0.0741221		CASSLRGDTEVLF	307	0.00395085		CSASRSQDTQYF	319	0.00446499		CSETVSNARLF	362	0.00457291		CSASSQEGVGGRRSAETLYF	274	0.0034887
CASGETNTEVF	6284	0.0851751		CSEGTGVHQDTQYF	6946	0.090824		CASSQGSQDTQYF	7290	0.104106		CASSKDSYEQYF	3962	0.0639022		CASSSGTGGAGSPLYF	634	0.00782906		CASSDPGGIEQYF	4794	0.0739986		CSSTGTGGGQNTSYF	307	0.00395085		CSADNYEQCF	318	0.00445099		CSADRADTEAF	358	0.00452238		CSGTGRTNAETLYF	272	0.00346324
CASSPDKNNQAPLF	6268	0.0849582		CASSLGTVNQDTQYF	6937	0.0907064		CASGDADRATGQLYF	7285	0.104034		CASSDAWRGVF	3955	0.0637893		CASSLGRGNSPLYF	617	0.00761914		CASGDAWDRGPQNTLYF	4772	0.073659		CASSGDAQAQHF	304	0.00391224		CSAGRYNSPLYF	317	0.004437		CASSDARTGDAEQF	353	0.00445921		CASSREGVGGRRSAETLYF	271	0.0034505
CASSLGRNTGQLYF	6262	0.0848769		CSADPDTSSYEQYF	6931	0.0906279		CASSPSGTGVAETLYF	7275	0.103892		CASSDSTGGHSYEQYF	3942	0.0635796		CASSLDRANTGVF	612	0.00755739		CASSDGWGLYEQYF	4768	0.0735973		CASSQGQGTGQLYF	304	0.00391224		CASSQSGGNNQDTQYF	317	0.004437		CASRRTGPNSDSTF	345	0.00435816		CAGSQQDTQYF	271	0.0034505
CASSPPGSGNTLYF	6235	0.084511		CASGGQGQDTQYF	6930	0.0906148		CASSEILGGYEQYF	7274	0.103877		CASSSGGAGNTLYF	3872	0.0624506		CSGDSSQNTLYF	606	0.0074833		CASGGGGDVEQF	4722	0.0728872		CSATANTEVF	302	0.0038865		CASSGGQANTGQLYF	315	0.004409		CASGADRVNYAGQF	342	0.00432026		CASSHIWGYERYF	269	0.00342504
CASSSGQTEVF	6228	0.0844161		CASSGQNNQAQHF	6910	0.0903533		CASGAGTNNNQAPLF	7147	0.102064		CASSQEGSRERLF	3864	0.0623216		CGVGQGNSAETLYF	603	0.00744625		CASSLGGIEQYF	4710	0.072702		CGADRATEVF	302	0.0038865		CTRSADQGAETLYF	315	0.004409		CTGSETVSNERLF	342	0.00432026		CSAHNQAPLF	268	0.00341231
CASSPSSQNTLYF	6210	0.0841721		CSADQGGGAETLYF	6907	0.0903141		CASSETGGDTLYF	7139	0.101949		CASEQGNYAEQF	3860	0.0622571		CASGGQLYEQYF	587	0.00724868		CASRDWGLNTGQLYF	4702	0.0725785		CARSRAGANSGNTLYF	302	0.0038865		CSAGTVYVEQF	314	0.00439501		CSETVSNER_F	341	0.00430763		CSARDQAPLF	267	0.00339957
CASRPGLGAQNTLYF	6188	0.0838739		CASGDFWVHTGQLYF	6898	0.0901964		CASSLWTEQYF	7117	0.101635		CSADANNEGLF	3837	0.0618861		CTRSARGTEVF	582	0.00718693		CASSLQGRGDTQYF	4699	0.0725322		CAWSLRDNTGQPYF	301	0.00387364		CTRSADQYNAETLYF	313	0.00438101		CSARGGDTRYF	339	0.00428236		CSADEGSYTSPLYF	267	0.00339957
CASSLGQGAGQLYF	6170	0.0836299		CASSQGTGGSPLYF	6886	0.0900395		CASRDRGGQDTQYF	7101	0.101407		CASSPTGGSAETLYF	3837	0.0618861		CASGDGDSSGNTLYF	561	0.00692761		CASSGSSQNTLYF	4685	0.0723161		CSGHTSQDTLYF	297	0.00382216		CSADANSYEQYF	313	0.00438101		CSETVANERLF	336	0.00424447		CASSQEGVGGRRSAEALYF	261	0.00332318
CASSAGQANSDYTF	6169	0.0836164		CSADLTGKEVF	6884	0.0900133		CAWGAGTTEVF	7000	0.0999644		CASSLDEGYEQYF	3818	0.0615796		CSVGQGNSAEALYF	560	0.00691526		CASSDQNTEVF	4680	0.0722389		CSGAGGNTEVF	297	0.00382216		CRADPAANTEVF	313	0.00438101		CASSLS_GVQNTLYF	332	0.00419394		CSASRSQNTLYF	260	0.00331045
CASSLSDRGAETLYF	6157	0.0834537		CASSLQISNERLF	6881	0.0899741		CASLRDNAETLYF	6733	0.0961515		CASSQEGRGESNERLF	3811	0.0614667		CANSLKTNSNTEVF	557	0.00687822		CASSLTGGVAEQF	4671	0.0721		CAGSLRGDTEVF	295	0.00379642		CSAVGGEQYF	312	0.00436701		CASPLRGRGTEVF	330	0.00416867		CSGQNQDTPYF	259	0.00329771
CASSDAINSDYTF	6148	0.0833317		CSADMTGDYEQYF	6875	0.0898957		CAWGAGNTEVF	6724	0.096023		CTRSADANNERLF	3801	0.0613055		CASSDWDNSYERYF	546	0.00674238		CASSPGGAEVF	4645	0.0716987		CASSQDPANTEVF	295	0.00379642		CSADQGAETPYF	311	0.00435301		CASSYRGRNSDYTF	330	0.00416867		CASSRTGVSYEQYF	258	0.00328498
CASSRTNYAEQF	6146	0.0833046		CSGGQANTEVF	6866	0.089778		CASSDAATNSGNTLYF	6641	0.0948377		CASSFGGGAETLYF	3794	0.0611926		CSVGQGNSAGTLYF	538	0.00664359		CASSEGQGRNTEVF	4618	0.0712819		CSAPGAGAEQF	295	0.00379642		CSGGREVF	311	0.00435301		CAGSLRGRGTEVF	327	0.00413077		CASSPTASNEGLF	254	0.00323405
CASSTGDTEVF	6145	0.0832911		CSAAESAETLYF	6858	0.0896734		CASSDARTEYEQYF	6614	0.0944521		CASSLVGTNERLF	3766	0.0607409		CASSFRDWGSSAETLYF	525	0.00648306		CASSDAISNTEVF	4584	0.0707571		CGARYNSPLYF	293	0.00377068		CAGSTRSQNTLYF	310	0.00433902		CASSDMDGYEQCF	323	0.00408024		CSGQNQDT_YF	254	0.00323405
CASSLRYNYAEQF	6143	0.083264		CASSPDRANTEVF	6853	0.089608		CASSLQGSSAETLYF	6562	0.0937095		CASSDAGSSYEQYF	3759	0.060628		CASSQDGGAQDTQYF	521	0.00643366		CASRGTSAETLYF	4579	0.0706799		CASSRGQDTGQLYF	293	0.00377068		CSADQYDAETLYF	310	0.00433902		CASRRTGPNSDYPF	323	0.00408024		CSGIGRTSAETLYF	251	0.00319585
CASSILGNQDTQYF	6138	0.0831962		CSALGTFSYEQYF	6845	0.0895034		CASGGGQGAPENTLYF	6560	0.0936809		CASSRDSSNERLF	3640	0.0587087		CVSSLDRANTEVF	519	0.00640897		CASSAGTGSNERLF	4552	0.0702632		CSAEALNQGTQYF	293	0.00377068		CASSESGGGQSTLYF	309	0.00432502		CSDDTANERLF	321	0.00405498		CASSPGLGANTGQLYF	250	0.00318312
CAGGFSYEQYF	6124	0.0830064		CSADQAGGDEQYF	6826	0.089255		CAWSLPRGNSPLYF	6510	0.0929669		CASSLELGGREQYF	3586	0.0578378		CASSLHNSYNSPLYF	502	0.00619904		CASRTGEGEQYF	4535	0.0700008		CASSPDRGSDYTF	293	0.00377068		CASSLRGREDEQYF	309	0.00432502		CAGGDARNTGQLYF	319	0.00402972		CASSQQGTQYF	250	0.00318312
CASSGQGSNSDYTF	6121	0.0829658		CSAEEAGGEQYF	6807	0.0890065		CASSQDLRGNTEVF	6418	0.0916531		CASSLDGFNYAEQF	3581	0.0577571		CAGSAGQGAGNTLYF	493	0.0060879		CASSDILGQDTQYF	4522	0.0698001		CTRSATVNTEVF	292	0.00375781		CASGAWTGRNTLYF	307	0.00429703		CSAVWGDGQYF	318	0.00401708		CASSQEGVRGRRSAETLYF	250	0.00318312
CASSLSGSSYEQYF	6083	0.0824507		CASSLEGRGNTEVF	6801	0.0889281		CASSGGAHVF	6408	0.0915103		CASSLEAIPSYEQYF	3551	0.0572733		CGGDNSQNTLYF	484	0.00597676		CATGGAGTGQLYF	4494	0.0693679		CANMSQGRTLYCTCSADRANTGQLYF	292	0.00375781		CRGNYEQYF	306	0.00428303		CSAPHCGQDTQYF	317	0.00400445		CSASRGQNILYF	249	0.00317039
CASSLGGNSGNTLYF	6077	0.0823694		CASSPQLGGEQYF	6801	0.0889281		CASSLGQNNYAEQF	6407	0.091496		CASSSGQGRAETLYF	3501	0.0564668		CASSQDGGAVAGTLYF	474	0.00585327		CASRDRETERLF	4456	0.0687813		CSASGTGAGQF	292	0.00375781		CSDRSSNERLF	305	0.00426903		CSETVSNEKLF	317	0.00400445		CSLTGGNQAPLF	249	0.00317039
CASSTGTGDTEVF	6056	0.0820847		CASSDDEQYF	6794	0.0888365		CAWSPRQTNSGNTLYF	6353	0.0907248		CASSLEGTAYAEQF	3493	0.0563378		CSGDNSQDTLYF	465	0.00574214		CASTSQNTLYF	4381	0.0676237		CASRPGDWGEQYF	291	0.00374494		CSADASSYGQYF	305	0.00426903		CAWSRGARDAQYF	314	0.00396655		CASGDETRGVF	248	0.00315766
CASGDEGGPNERLF	6047	0.0819627		CSRGLGGRWDTQYF	6791	0.0887973		CSAPGTDNNQAQHF	6345	0.0906106		CARRGLSNERLF	3442	0.0555152		CSADQEAPPF	456	0.005631		CASSEAGSAETLYF	4368	0.067423		CGALRDRNTEVF	291	0.00374494		CSGINQDTQYF	305	0.00426903		CSESVSNERLF	313	0.00395392		CASSQRDTQYF	248	0.00315766
CASSLDLGGSEQYF	6045	0.0819356		CSATGKATEVF	6785	0.0887188		CASSPRDRGAEQF	6339	0.0905249		CASSPGGANTGQLYF	3426	0.0552572		CAWSLTGGVYAE_F	446	0.00550751		CASRRGGTEVF	4354	0.0672069		CSADPEGETEVSF	290	0.00373207		CRPGQNYAERF	304	0.00425504		CASSQGQG_VF	311	0.00392866		CASSQDRTANSDYTF	248	0.00315766
CASSPRANTEVF	6031	0.0817459		CSARAVSNERLF	6783	0.0886927		CASSRDWGETYAEQF	6310	0.0901108		CASGDALGTYEQYF	3417	0.055112		CASSLKTNSNIEVF	441	0.00544577		CASSDANTEVF	4294	0.0662808		CGASGTGAEQF	289	0.0037192		CASSTRSQNALYF	303	0.00424104		CASSPRGRGTEVF	311	0.00392866		CASSQQGVGGRRSAETLYF	247	0.00314492
CASGDARTGVAEQF	6030	0.0817323		CASSDFSSYEQYF	6763	0.0884312		CASSQVLGDQDTQYF	6159	0.0879544		CASKTGEGTEVF	3408	0.0549668		CASGLDRANTEVF	427	0.00527289		CASSYRDNSPLYF	4237	0.0654009		CSATGDSAETPYF	289	0.0037192		CASSGGQGANYF	301	0.00421305		CASSPRGANSDYTF	311	0.00392866		CSVGQGANTGQLYF	243	0.00309399
CASSVGSQNTLYF	6014	0.0815155		CASSERFGTEVF	6763	0.0884312		CASSQDRGPNERLF	6153	0.0878687		CASSGAGDSPLYF	3385	0.0545959		CTRSADQSGGGTQYF	427	0.00527289		CASSDGGAHTGQLYF	4230	0.0652929		CASSLGGDTEVF	288	0.00370634		CSADAGSYEQYF	299	0.00418505		CASRRTGPNSGYTF	310	0.00391602		CASGQQDTQYF	243	0.00309399
CASSPGGSNQDTQYF	6002	0.0813528		CSAPGQYAEQF	6756	0.0883397		CAWSLWGVF	6074	0.0867405		CASSDWDRGMQNTLYF	3372	0.0543862		CASSDARGPSAETLCF	426	0.00526054		CASSGGQGNTEVF	4227	0.0652466		CAWRRTFNSQAQHF	285	0.00366773		CTRSAVAGGHERLF	299	0.00418505		CGADWGASTEVF	307	0.00387813		CSLIGVNQAPLF	242	0.00308126
CASSDQGASAETLYF	5996	0.0812715		CASRDSNERLF	6755	0.0883266		CASGERDREVF	5984	0.0854553		CSADADNERLF	3353	0.0540798		CSGDNSQNTLHF	419	0.0051741		CASSVDFNQDTQYF	4204	0.0648915		CASSPGAWGEQYF	285	0.00366773		CASSQSGDNNQGTQYF	298	0.00417106		CASSDAQVFANTEVF	306	0.00386549		CSAGQGANTGQLCF	238	0.00303033
CASRPTGEGDTQYF	5989	0.0811766		CSAGTGPGNTLYF	6730	0.0879997		CASSLTGNSPLYF	5789	0.0826706		CASSDRGRAGNTLYF	3350	0.0540314		CSLEIQSSEAGDSALYLRASSPGTGGYEQYF	417	0.0051494		CASSDGGRQDTQYF	4201	0.0648452		CSADPEGETEAF	284	0.00365486		CASSGINQDTRYF	298	0.00417106		CASGGARNTGQLYF	305	0.00385286		CASSQDGTANSDCTF	238	0.00303033
CASSDASGDEQYF	5976	0.0810004		CASSYRGEEGNQAPLF	6688	0.0874505		CASGPRDRGSYEQYF	5682	0.0811425		CASSLDPGTNERLF	3328	0.0536765		CASSDWGNSYEQYF	414	0.00511235		CASSDLGVYEQYF	4163	0.0642587		CTRSADVGGLYAEQF	283	0.00364199		CASSHRDWTTGQLYF	296	0.00414306		CSETVSNERF	304	0.00384023		CSLTGINQAPLF	237	0.0030176
CASSEGQGNSDYTF	5976	0.0810004		CSGGHSAETLYF	6682	0.087372		CASSQGRGPNERLF	5650	0.0806856		CASGSGGEEQYF	3320	0.0535475		CASSLDRATTEVF	411	0.00507531		CASSRLGGSAETLYF	4144	0.0639654		CSADRADTGQLYF	283	0.00364199		CASSPRDWGTSAETLYF	295	0.00412907		CASGDARNTGQLHF	302	0.00381497		CSVDEGSYNSPLYF	236	0.00300487
CASSPSGQTSAETLYF	5972	0.0809462		CSADGSNTEVF	6674	0.0872674		CASSGEGARALYF	5645	0.0806142		CASSLDGNTLYF	3267	0.0526927		CAWSLTGGVYAEQSF	410	0.00506296		CASGETGNYNSPLYF	4142	0.0639345		CAWRRAFNNQAQHF	283	0.00364199		CASSEGQANTGQPYF	294	0.00411507		CASSQGGLQGTQYF	301	0.00380233		CSVRLGGPSAETLYF	236	0.00300487
CASSSRQGRNSPLYF	5968	0.080892		CSVGQGNTEVF	6652	0.0869798		CASSSGTGDNQAPLF	5377	0.0767869		CASSLEYNSPLYF	3253	0.0524669		CASNLKTNSNTEVF	409	0.00505061		CASSQDNNERLF	4131	0.0637647		CASSPGDWGSYEQYF	282	0.00362912		CSDWDKEVF	294	0.00411507		CSAPHWGQDSQYF	296	0.00373917		CSACNQAPLF	235	0.00299213
CASGGNRVNQDTQYF	5946	0.0805938		CASSFAGGQDTQYF	6646	0.0869013		CASSQDGGVGNTLYF	5259	0.0751018		CASSFSGANTGQLYF	3209	0.0517572		CARSLKTNSNTEVF	401	0.00495182		CASRGQGGNTEVF	4127	0.063703		CSAVSQNALYF	282	0.00362912		CSADASPYEQYF	292	0.00408707		CSETVSHERLF	296	0.00373917		CASSGLGGSEQF	233	0.00296667
CASSDTGGEGAETLYF	5943	0.0805531		CSAETGDNNQAQHF	6625	0.0866267		CASSQDAGAFSYEQYF	5254	0.0750304		CASSSGPANTGQLYF	3205	0.0516927		CSIDSGNTLYF	398	0.00491477		CASSEWGGAGQNTLYF	4098	0.0632554		CSAGRDISHNSPLYF	280	0.00360338		CASSGINRDTQYF	291	0.00407308		CASSIWGGYAEQF	292	0.00368864		CSARLRGPSAETLYF	232	0.00295394
CASRTTNSDYTF	5938	0.0804853		CSADRGRANTEVF	6618	0.0865352		CASGRDRGDNQAPPF	5217	0.074502		CASSPGGSDYTF	3141	0.0506605		CSAGTGANQAPLF	397	0.00490243		CASSDAGQGYEQYF	4047	0.0624681		CLAGGHAEQF	279	0.00359051		CSPVSAETLYF	290	0.00405908		CASSLEGQQDIQYF	291	0.00367601		CASGDANSDYTF	231	0.0029412
CASSLVETYEQYF	5922	0.0802685		CASSAGANSDYTF	6616	0.086509		CASSDGRNTEVF	5200	0.0742593		CASGEGYNNQAPLF	3129	0.0504669		CRGDNSQNTLYF	386	0.00476659		CASSEDSTNSDYTF	4006	0.0618353		CSASGADAEQF	278	0.00357764		CGAAGTGVAEQF	288	0.00403109		CASSLEDGQNTLYF	284	0.00358758		CSADEGSSNSPLYF	231	0.0029412
CASSRQNERLF	5900	0.0799703		CATGLQGDTGQLYF	6612	0.0864567		CASGDQTNSDYTF	5174	0.073888		CASGDVTNERLF	3110	0.0501605		CASSLDRTNTEVF	385	0.00475424		CASSGTDNNQAPLF	3983	0.0614803		CTRSADPEGETEVF	278	0.00357764		CTRRGTPYEQYF	287	0.00401709		CSEPVSNERLF	283	0.00357495		CSAAEGSYNSPLYF	230	0.00292847
CSAEQYEQYF	5891	0.0798483		CASSPGLVGEQF	6605	0.0863652		CASSDAARNYAEQF	5174	0.073888		CASSFRDRENTGQLYF	3106	0.050096		CAWSLTGGAYAEQF	383	0.00472954		CASGGQGAF	3979	0.0614185		CASSPGDWGEQF	278	0.00357764		CSGGQTNTEAF	287	0.00401709		CTRSAERQGTGQLYF	283	0.00357495		CASSLWYYDQYF	229	0.00291574
CASSLARRDNYEQYF	5888	0.0798076		CASSQDGQGAQVF	6594	0.0862214		CAWSLGGGSAETLYF	5030	0.0718316		CASSPGANSDYTF	2948	0.0475476		CSGDNGQNTLYF	379	0.00468015		CASSAGTISNERLF	3972	0.0613105		CSASGTGAEQLF	278	0.00357764		CTCRPGQNYAEQF	287	0.00401709		CASSLKGRGTEVF	283	0.00357495		CASSPSGATNTEVF	229	0.00291574
CASGDGTVNQDTQYF	5875	0.0796314		CSATGDNNQAPLF	6593	0.0862083		CGARDWDSYEQYF	5026	0.0717744		CASSLETGGYEQYF	2944	0.0474831		CASGGGQGNYAEQSF	379	0.00468015		CASSGSGQSNTEVF	3943	0.0608628		CSADARDALYF	277	0.00356477		CSASRDQDTQYF	287	0.00401709		CASSDAVTGDAEQF	280	0.00353705		CSTDEGSYNSPLYF	228	0.00290301
CASSDWGANTGQLYF	5865	0.0794959		CASSLYETNNSPLYF	6591	0.0861822		CASGSYEQYF	5023	0.0717316		CASGGTGDTQYF	2928	0.047225		CSADGGNYAEQF	377	0.00465545		CASSGGALAEQF	3935	0.0607393		CSPYREGEAF	275	0.00353904		CSGGQTSTEVF	286	0.00400309		CAGGADRVNYAEQF	280	0.00353705		CTSSQDTGGYAEQF	227	0.00289027
CASSLWGGSSYEQYF	5863	0.0794688		CASSPYWGSSYEQYF	6575	0.0859729		CASSGTTSQNTLYF	5012	0.0715745		CASSLGGRAETLYF	2921	0.0471121		CSVGQGNSAETLHF	377	0.00465545		CASSQVRGRGTEVF	3934	0.0607239		CSAGRDISYNSSLYF	275	0.00353904		CSASRGQDTRYF	284	0.0039751		CASGAGGVYAEQF	279	0.00352442		CAGGHRASAETLYF	227	0.00289027
CASSLPGQGNSPLYF	5844	0.0792112		CASSLSSFTEVF	6549	0.085633		CASGLGGRGQDTQYF	4820	0.0688326		CGADANNERLF	2921	0.0471121		CASSDRDNSYEQYF	376	0.0046431		CASSDQAYEQYF	3896	0.0601374		CASS_LAGEDTQYF	275	0.00353904		CGGTPYEQYF	284	0.0039751		CASRRLNQDTQYF	279	0.00352442		CTYSADEGSYNSPLYF	226	0.00287754
CASSRTGYEQYF	5843	0.0791977		CSGGQGGDTQYF	6531	0.0853976		CASGAAGTGGPLSYEQYF	4800	0.068547		CASSLDRGSGNTLYF	2888	0.0465799		CSVGQGNSAETQYF	374	0.00461841		CASSPDWAAETLYF	3895	0.0601219		CSAGGYAEQF	274	0.00352617		CSADPAANTEAF	283	0.0039611		CASGADGVNYAEQF	277	0.00349916		CASSQDGTANSGYTF	225	0.00286481
CASRDRLNYAEQF	5839	0.0791435		CSADLGGHAGNTLYF	6507	0.0850838		CASGDAGRANERLF	4645	0.0663335		CASSPHWGLNTGQLYF	2887	0.0465638		CSVGQGNGAETLYF	370	0.00456901		CASSDEGAGNTLYF	3877	0.0598441		CSADPEGGTEVF	273	0.0035133		CSALGGLAEQSF	283	0.0039611		CASSLSWGVRNTLYF	276	0.00348652		CASHIWGYEQYF	224	0.00285208
CASSPGGVSYEQYF	5820	0.0788859		CSADQNSGNTLYF	6500	0.0849923		CASSDRGRRTGQLYF	4590	0.0655481		CASSSDNSGNTLYF	2885	0.0465315		CASSFRTNTEVF	370	0.00456901		CASSPGGSYEQYF	3822	0.0589951		CSADRQGRNSPPYF	272	0.00350043		CSSRGLFSNGRLF	283	0.0039611		CASSLGHSGNTPYF	276	0.00348652		CASSQEGGGGRRSAETLYF	223	0.00283934
CASSPRSSAETLYF	5810	0.0787504		CASRRLGTSAETLYF	6499	0.0849792		CASSLEGGQDTEVF	4584	0.0654624		CASSGDWGTSAETLYF	2859	0.0461122		CASSLKTNSNTKVF	368	0.00454431		CASSLKISNERLF	3789	0.0584857		CASGQGQDTGQLYF	271	0.00348756		CAWSHWGNYAGQF	282	0.00394711		CASSLGGRGTEVF	272	0.003436		CASGGTNSDYTF	223	0.00283934
CASSQAGGQDTQYF	5807	0.0787097		CSADSYEQYF	6496	0.08494		CAWSLGGDQAPLF	4422	0.0631489		CASTPDWGQDTQYF	2851	0.0459831		CTCSVGQGNSAETLYF	368	0.00454431		CASSDAGTANSDYTF	3789	0.0584857		CSDGTGGPGQLYF	270	0.00347469		CASSPGTGNTEAF	282	0.00394711		CASNLEGQQDTQYF	272	0.003436		CAGSQGGGRSYEQYF	222	0.00282661
CASSQRDGYAEQF	5790	0.0784793		CSAVWGETLYF	6488	0.0848354		CASGQGNQDTQYF	4363	0.0623064		CASSLGTGVSNERLF	2733	0.0440799		CSLKTNSNTEVF	367	0.00453197		CASGDVGYEQYF	3770	0.0581925		CTRSADYNSYNSPLYF	270	0.00347469		CSADFGRNAGQLYF	282	0.00394711		CSADWGGAAEALYF	270	0.00341073		CASSPGTGDYNNRAPLF	221	0.00281388
CASSDTNERLF	5789	0.0784657		CSADFGGREQYF	6481	0.0847438		CASGDASNDRLF	4241	0.0605642		CASGDETGGAEQF	2704	0.0436122		CSADLGGNERYF	365	0.00450727		CASGDEGTGVERLF	3768	0.0581616		CSAPGTGAEQF	269	0.00346182		CSAGASSYEQYF	281	0.00393311		CANSLEDANTEVF	270	0.00341073		CASRQHYAEQSF	220	0.00280115
CASSQPDRGRF	5783	0.0783844		CASGRQNTLYF	6475	0.0846654		CAWSRTGNNQAPLF	4113	0.0587362		CASSLVDSGNTLYF	2679	0.043209		CSAGTGVNQAPPF	362	0.00447022		CASSRDISYEQYF	3710	0.0572663		CSADPEGEAEVF	268	0.00344895		CSGDREAF	281	0.00393311		CSADRADTEVLF	268	0.00338547		CSAGQGANTEQLYF	220	0.00280115
CASSDRGGGQNTLYF	5776	0.0782895		CSADSRAVF	6466	0.0845477		CASSDAQGRGERLF	4109	0.0586791		CASGDPGQGSDYTF	2664	0.042967		CAGGDRADYTF	359	0.00443318		CASSWTGRAPLF	3690	0.0569576		CTCSAEGANQDTQYF	267	0.00343608		CSSRGLFPNERLF	279	0.00390512		CSETVSNERVF	268	0.00338547		CSTSRGQNTLYF	217	0.00276295
CASSLPGNYAEQF	5772	0.0782353		CSADMGGTNERLF	6464	0.0845215		CASSLDAGANTEVF	4094	0.0584649		CASSDAGDSPPYF	2637	0.0425316		CASGDGADYTF	357	0.00440848		CASSLRDKYAEQF	3667	0.0566026		CLAGGYAEQLF	267	0.00343608		CASSESGGGQNTSYF	279	0.00390512		CSSRGGADTEVF	267	0.00337283		CSTRLGGPSAETLYF	216	0.00275022
CASSLGGGGAETLYF	5751	0.0779507		CSADTPGKTEVF	6459	0.0844562		CASSDGGGTEVF	4011	0.0572796		CASPDGISNERLF	2624	0.0423219		CASSLKTKSNTEVF	356	0.00439613		CASSQEDRGYAEQF	3666	0.0565872		CASGPLGGYAEQF	266	0.00342321		CASSITASAETLYF	279	0.00390512		CILEILSSEEDDSALYLCASSLYSQYEQYF	265	0.00334757		CASRSEQEGTEVF	216	0.00275022
CASGDAGGVNQDTQYF	5741	0.0778151		CSGTGGDTQYF	6443	0.0842469		CASGDAGPNERLF	3995	0.0570511		CASSLGF	2607	0.0420477		CSGDNS_NTLYF	355	0.00438378		CASSELGGRVAETLYF	3659	0.0564791		CASSIHPNSDYTF	266	0.00342321		CSASRGQDIQYF	278	0.00389112		CASSPDRDGDTLYF	255	0.00322125		CASSRQGAYNSPLYF	216	0.00275022
CASSQDMGRAEQF	5741	0.0778151		CASSSDRGVSNERLF	6416	0.0838939		CASSSWGNYAEQF	3849	0.0549661		CASSLVANTGQLYF	2600	0.0419348		CSADNRGQDTLYF	352	0.00434674		CASSLGDQDTQYF	3659	0.0564791		CASSQDLANTEAF	266	0.00342321		CSANSHNSPLYF	277	0.00387712		CSADPGHNALYF	255	0.00322125		CTYSGQNQDTQYF	215	0.00273748
CASSDDREEQYF	5722	0.0775576		CSADQDAEVF	6396	0.0836324		CASGVGASNERLF	3817	0.0545092		CASGDARAGEQYF	2571	0.0414671		CASGDRADYAF	351	0.00433439		CASGAVSNERLF	3651	0.0563556		CAWRRTFNNRAQHF	265	0.00341034		CASSLAGRLYF	276	0.00386313		CASGADRANYAEQF	255	0.00322125		CTSSQQDTQYF	215	0.00273748
CASSSAGYAEQF	5717	0.0774898		CSADGAEVF	6375	0.0833578		CASSLEQNNQAPLF	3799	0.0542521		CASSLDLREDEQYF	2563	0.041338		CAWSLTGGVYAEQLF	348	0.00429734		CASSDRGGDQDTQYF	3634	0.0560932		CTRSDRQGNTEVF	265	0.00341034		CSVSRGQDTQYF	276	0.00386313		CSAPGGRNTGRLYF	254	0.00320861		CDSSGLGGTEQF	215	0.00273748
CASRFWGGSSYEQYF	5716	0.0774763		CASSQEEGAETLYF	6365	0.083227		CSAVRGSNTGQLYF	3792	0.0541522		CASGDGGASYEQYF	2556	0.0412251		CTYSVGQGNSAETLYF	346	0.00427264		CASSRQGSYNSPLYF	3627	0.0559852		CSVTGDEQYF	264	0.00339747		CSDRLSNERLF	276	0.00386313		CASSPQGTNSDYTF	250	0.00315808		CSADEGSYNSSLYF	215	0.00273748
CASSLSGISNERLF	5685	0.0770561		CASSLTGTNSDYTF	6351	0.083044		CAWSRQGAYNSPLYF	3787	0.0540807		CASSSGTANSDYTF	2549	0.0411122		CASSSDRANTEVF	343	0.0042356		CASGGERLF	3620	0.0558771		CSAPGADAE_F	264	0.00339747		CTRSAVGDEQYF	275	0.00384913		CASSGPGQSNERLF	249	0.00314545		CSGTGRTSAEMLYF	213	0.00271202
CASSQERDSPLYF	5685	0.0770561		CSARLVSQNTLYF	6348	0.0830048		CASGGNERLF	3445	0.0491968		CASSLGVEQF	2534	0.0408703		CANSLDRANTEVF	340	0.00419855		CASRGTTNSDYTF	3619	0.0558617		CSGTANTEVYF	264	0.00339747		CSAARGTYAEQF	274	0.00383513		CASSLDRGGSGNTLYF	249	0.00314545		CSASWGQNTLYF	213	0.00271202
CASSGTPNSDYTF	5684	0.0770425		CASRDTINQDTQYF	6347	0.0829917		CASSDSNQAPLF	3416	0.0487826		CASSLGQLGNTLYF	2508	0.040451		CASSLDRANSDYTF	337	0.00416151		CASSFRGQDTQYF	3610	0.0557228		CSADPEGETEVLF	263	0.0033846		CAGSLRDWGTSAETLYF	273	0.00382114		CAGSPQGANSDYTF	248	0.00313282		CASSGLGGTEQ-F	212	0.00269929
CASSDAGGKAEQF	5679	0.0769748		CASTGTREQYF	6334	0.0828217		CSAVRDSNTG_LYF	3376	0.0482114		CSADANNGRLF	2489	0.0401445		CTRSAGTGVNQAPLF	336	0.00414916		CASGDARDSNERLF	3588	0.0553832		CAWGLRDNTGQLYF	263	0.0033846		CASSPRDREDEQYF	272	0.00380714		CASGLGHSGNTLYF	246	0.00310755		CASSGLGWTEQF	211	0.00268655
CASSLGSASQNTLYF	5676	0.0769341		CASSASYNSPLYF	6333	0.0828086		CASSDDGGSNERLF	3314	0.047326		CASSLSGANTEVF	2450	0.0395155		CTRSAGHNNYAEQF	335	0.00413681		CASGDAAGSYAEQF	3564	0.0550127		CTYSAPGADAEQF	262	0.00337174		CAGSQSGDNNQDTQYF	272	0.00380714		CASRRTGPDSDYTF	244	0.00308229		CASSGLVGTEQF	210	0.00267382
CSGDSNERLF	5651	0.0765953		CSAVRGFSNERLF	6330	0.0827694		CASRAGTYNNQAPLF	3174	0.0453267		CASSLGLDEQYF	2417	0.0389832		CTRSADQEAPLF	330	0.00407506		CASSDVGYGQYF	3551	0.0548121		CASSQDHRYNSPLYF	262	0.00337174		CSANPYNSPLYF	272	0.00380714		CASSLEG_QDTQYF	244	0.00308229		CSLTGVNQAPF	210	0.00267382
CASSLVGGDEQYF	5649	0.0765681		CASSL_GGDQDTQYF	6327	0.0827302		CTSRAGTYNNQAPLF	3148	0.0449554		CASSDAGQGAGNTLYF	2377	0.0383381		CSVGQGNSAETLCF	325	0.00401332		CASSGVGYEQYF	3546	0.0547349		CTRSAAGGAGNSPLYF	262	0.00337174		CASSLRDRGTSAETLYF	271	0.00379314		CSADSSGSTLYF	241	0.00304439		CTYSAGQGANTGQLYF	210	0.00267382
CASGGDRGRYTEVF	5645	0.0765139		CASSERNNQDTQYF	6307	0.0824686		CSAEGQGAGQLYF	3127	0.0446555		CASSPWDWGYAERF	2372	0.0382574		CASGDARTGRSGNTLYF	319	0.00393923		CASSERDKNTLYF	3528	0.054457		CSDRQGSTEVF	262	0.00337174		CTRSGLGGGDTQYF	271	0.00379314		CASGDARNAGQLYF	240	0.00303176		CNLTGVNQAPLF	210	0.00267382
CASSPGQGEDTQYF	5643	0.0764868		CASSLARGYEQYF	6299	0.082364		CASSSTGNNQDTQYF	3125	0.044627		CASSEGVNSDYTF	2360	0.0380639		CSMGQGNSAETLYF	319	0.00393923		CASSDDGGAAETLYF	3521	0.054349		CAWSLGDNTGQLYF	261	0.00335887		CAGGALGGRGEQYF	270	0.00377914		CSAPHWGPDTQYF	238	0.0030065		CASSGLWGTEQF	210	0.00267382
CASSLEGGGRNTEVF	5636	0.0763919		CSDSYNSPLYF	6290	0.0822464		CASRPGTGDYEQYF	3082	0.0440129		CSADANNERLLF	2347	0.0378542		CSVRQGNSAETLYF	318	0.00392688		CASSQDLGVSYEQYF	3476	0.0536544		CASGAAGGNQATQYF	260	0.003346		CIFVQAAAGTGGARNQDTQYF	270	0.00377914		CSAGTGNAEVF	238	0.0030065		CSLTGVNQASLF	209	0.00266109
CSATDSDYTF	5626	0.0762564		CASSHSYNSPLYF	6264	0.0819064		CASSDPREGNTEVF	3012	0.0430133		CSADASNERLF	2301	0.0371123		CASGGRADYTF	314	0.00387749		CASRPPGQTEVF	3476	0.0536544		CTRSAEALNQDTQYF	259	0.00333313		CASSLAGQLHF	270	0.00377914		CSAPHWGQDTQYFGPGTRLLYNNEPASF	237	0.00299386		CASSQQDT_YF	209	0.00266109
CASSDAWVQNTLYF	5622	0.0762022		CASSGTGGRTQYF	6259	0.081841		CASSLTLSNERLF	2910	0.0415566		CASSAGAGNTLYF	2296	0.0370317		CASNDRDQDTQYF	311	0.00384044		CANSQDGTGGAERLF	3474	0.0536235		CSGTGGNTEAF	259	0.00333313		CASSLTGVTSNERLF	269	0.00376515		CSAPHWGQDPQYF	237	0.00299386		CASGHRASAETPYF	208	0.00264836
CASGDVPNSDYTF	5615	0.0761073		CASSQDTNYAEQF	6259	0.081841		CASKDRVGNTLYF	2903	0.0414567		CASSLSGTGGHEQYF	2284	0.0368381		CASSGTEETLYF	308	0.00380339		CSADTEVF	3441	0.0531141		CASRPLGGHAEQF	258	0.00332026		CASSQSRDHYAVQF	268	0.00375115		CASSPSQTEQF	237	0.00299386		CSAGVNILYF	207	0.00263562
CASGALTGGSEQYF	5611	0.0760531		CASSDRGRAPLF	6254	0.0817756		CASSFEVSEQYF	2893	0.0413139		CASSDAGGSPLYF	2270	0.0366123		CSAGTGINQAPLF	307	0.00379105		CASNRGNERLF	3439	0.0530833		CGADRQGRNSPLYF	258	0.00332026		CASSGSGGGQNTLYF	267	0.00373715		CTSRRTGPNSDYTF	235	0.0029686		CTYSASRGQNTLYF	207	0.00263562
CSAEQSTEVF	5609	0.076026		CASGDRLGGEQYF	6252	0.0817495		CSAGRAGQF	2750	0.0392717		CAGSDAGDSPLYF	2246	0.0362252		CASSLKTNSNTEIF	307	0.00379105		CASSRGQDYAEQF	3398	0.0524504		CASGAAGGNRDTQYF	257	0.00330739		CA_SLGTGRDEQYF	267	0.00373715		CASGQGGTGVDTQYF	234	0.00295597		CASS_DGTANSDYTF	207	0.00263562
CASGDDWGEDTQYF	5601	0.0759175		CASRPGQANSDYTF	6247	0.0816841		CASRPTGGNYAEQF	2737	0.0390861		CASSLESISNERLF	2214	0.0357091		CSAPRDPGGDTQYF	307	0.00379105		CASSRGDTQYF	3346	0.0516477		CSGGAGGPGQLYF	257	0.00330739		CGALGGLAEQF	267	0.00373715		CASSLRGWGTEVF	232	0.0029307		CSDTGRTSAETLYF	207	0.00263562
CASSTGTDQDTQYF	5599	0.0758904		CASSQEAVYNSPLYF	6163	0.0805857		CASSQDMHSDYTF	2644	0.037758		CGARAVSNSDYTF	2163	0.0348865		CASSLKTNSNTEVYF	306	0.0037787		CASSETGTSYNSPLYF	3281	0.0506444		CSASGAGAEQF	256	0.00329452		CAGSEGQANTGQLYF	267	0.00373715		CAWSLGAF	232	0.0029307		CSARLGEPSAETLYF	206	0.00262289
CASSYRDGTEVF	5585	0.0757007		CASPGWGPSAETLYF	6155	0.0804811		CASSPDSTEVF	2590	0.0369868		CASGDAGLGGRQNTLYF	2119	0.0341769		CASSGTSTEVLF	305	0.00376635		CASSFGQGAEQF	3274	0.0505364		CSVPGADAEQF	256	0.00329452		CGAVAGGHERLF	266	0.00372316		CASSDTNSDHTF	231	0.00291807		CSARLGGPSTETLYF	206	0.00262289
CASSLGTGRYEQYF	5581	0.0756465		CSAEDSGNTLYF	6141	0.0802981		CASSPDWGGTGQLYF	2577	0.0368012		CSANANNERLF	2104	0.0339349		CASSLKTNANTEVF	303	0.00374165		CASSLGLANTEVF	3258	0.0502894		CSALGADAEQF	256	0.00329452		CASSIGGQGAEVF	266	0.00372316		CASGDATGGAGNTLHF	231	0.00291807		CASGGRQSRNTLYF	206	0.00262289
CASSEWTGGARAEQF	5579	0.0756193		CASGGQGNTEVF	6141	0.0802981		CASSPTDSGNTLYF	2466	0.035216		CASSRDRGGEQYF	2085	0.0336285		CSADREAPLF	301	0.00371695		CASGGGTGEGSDYTF	3248	0.050135		CSGHTSQNTLCF	255	0.00328165		CSADFGRNTGQPYF	266	0.00372316		CSAGRADTEVF	230	0.00290544		CSAGINTLYF	205	0.00261016
CASSQEGDTLYF	5575	0.0755651		CASSEGLGGAETLYF	6136	0.0802327		CASSFTPNTGQLYF	2455	0.0350589		CSADANDERLF	2081	0.033564		CASSQARDRYAEQSF	301	0.00371695		CASSGTGANYAEQF	3230	0.0498572		CGGHTSQNTLYF	254	0.00326878		CSDRFSNEGLF	265	0.00370916		CASGADRVNYAEQLF	230	0.00290544		CASSDARDRDGQYF	204	0.00259743
CASSQGASAETLYF	5563	0.0754025		CASGTGAGNTLYF	6131	0.0801673		CAWSLPNQAQHF	2418	0.0345306		CASSRTGQDTQYF	2074	0.0334511		CSADRGAAPPF	300	0.0037046		CASSDNTEVF	3193	0.0492861		CSGHTSRNTLYF	254	0.00326878		CSALGGLAGQF	265	0.00370916		CASSPSWGVQNTLYF	229	0.00289281		CASSGARDRDEQYF	204	0.00259743
CASSQGLQDTQYF	5552	0.0752534		CASSVRAYNSPLYF	6112	0.0799189		CASSFTGGNSDYTF	2374	0.0339022		CASSFQGYEQYF	2073	0.0334349		CASSLYKMGGSYEQYF	297	0.00366756		CASSAGGQNTLYF	3162	0.0488076		CGADGAEQF	251	0.00323017		CSAVQGAETLYF	264	0.00369516		CASSEPGQSNERLLF	229	0.00289281		CSVRNQAPLF	203	0.00258469
CASSDRGGGAETLYF	5543	0.0751314		CSADPDRREVF	6112	0.0799189		CGETGGSTEVF	2271	0.0324313		CASSRLGVYAEQF	2036	0.0328382		CSASRDPGGGTQYF	295	0.00364286		CASSETGGSYEQYF	3154	0.0486841		CASSQDPAGGHAEQLF	251	0.00323017		CRLGQNYAEQF	263	0.00368117		CAGSQGGLQDTQYF	228	0.00288017		CSGTGRISAETLYF	203	0.00258469
CSQNTEVF	5528	0.0749281		CASSQGTEAYEQYF	6087	0.079592		CASSLTGGYAEQF	2216	0.0316459		CASSLGRRSGNTLYF	2034	0.0328059		CAGSQGQGDTEVF	293	0.00361816		CASSDARGTQAPLF	3113	0.0480512		CSADRATGVF	250	0.0032173		CASSLGGRAEQF	262	0.00366717		CASWVSYNSPLYF	227	0.00286754		CASTLWYYEQYF	203	0.00258469
CSADYSTEVF	5521	0.0748332		CASSLRSTNTEVF	6082	0.0795266		CASSFGQSNERLF	2205	0.0314888		CASSSGTGNERLF	1990	0.0320963		CSAGTGVDQAPLF	289	0.00356877		CASSDANKEVF	3100	0.0478506		CASSPGDWGAPNTGQLYF	250	0.0032173		CASSTTPDSDYTF	261	0.00365317		CASSPAGAETLHF	225	0.00284228		CSADEGSDNSPLYF	203	0.00258469
CASSLGDAEQF	5518	0.0747925		CASSQDPDRGTGQLYF	6082	0.0795266		CASSTRDRGIERLF	2170	0.030989		CASSLRGSNERLF	1954	0.0315156		CASSPRGGQNTLYF	289	0.00356877		CASSQGQFSNERLF	3097	0.0478043		CASSQDLADTEVF	249	0.00320444		CSADFWRNTGQLYF	261	0.00365317		CASGGTGGALEQYF	224	0.00282964		CASSHTWGYEQYF	202	0.00257196
CASSARQGNSDYTF	5514	0.0747383		CSAGGGHSYEQYF	6068	0.0793435		CASGARTASDYTF	2107	0.0300893		CASSLRTGGTEVF	1926	0.031064		CARSLTGGVYAEQF	288	0.00355642		CASRDRGREQYF	2991	0.0461681		CANMSQGRTLYCTCSAEALNQDTQYF	249	0.00320444		CAWSPGTGDDTQYF	261	0.00365317		CTRSADRADTEVF	223	0.00281701		CASSHIWGYEQCF	202	0.00257196
CASSGTVPGQLYF	5499	0.074535		CASGERGGAETLYF	6051	0.0791213		CASSGQNSDYTF	2043	0.0291753		CASGDAGDSPLYF	1877	0.0302737		CAGSWDGSGNTLYF	286	0.00353172		CASSWGQYNSPLYF	2987	0.0461063		CGGTGGNTEVF	248	0.00319157		CASSPGQSNSPLYF	260	0.00363918		CASSLEGQHDTQYF	223	0.00281701		CSARLGGPSVETLYF	202	0.00257196
CASSPNYAEQF	5487	0.0743723		CASSQDRNTGQLYF	6033	0.0788859		CASSLGLGGNYAEQF	2036	0.0290754		CASSLTVSQNTLYF	1868	0.0301285		CASSPGLGSSAETLYF	285	0.00351937		CASSFWVDTQYF	2955	0.0456124		CSADRATEVSF	247	0.0031787		CASSRPSYEQYF	260	0.00363918		CASSGTGGRNEQYF	221	0.00279175		CSSTGRTSAETLYF	201	0.00255923
CASSPGSSAETLYF	5480	0.0742775		CAWSGTGANTGQLYF	6020	0.0787159		CASSLGLGTQDTQYF	2021	0.0288612		CASSLVGGAREQYF	1858	0.0299673		CSAARGGCF	285	0.00351937		CASSDAGYEQYF	2923	0.0451185		CASSQGPAGGHAEQF	247	0.0031787		CASSLAGQLCF	259	0.00362518		CASSLRDNYAGQF	218	0.00275385		CSGTGRPSAETLYF	200	0.0025465
CSADGAGPETLYF	5477	0.0742368		CSAGQNERLF	6008	0.078559		CASSLGGGDNYAEQF	2017	0.028804		CASSFNWGINQDTQYF	1851	0.0298544		CASSDGDQDTQYF	277	0.00342058		CASSPTGGKNTLYF	2853	0.044038		CASSQPTVSAETLYF	246	0.00316583		CTRSADPAANTEVF	258	0.00361118		CAGSDMDGYEQYF	218	0.00275385		CSADEGS_NSPLYF	200	0.0025465
CASSPDWGGYEQYF	5448	0.0738437		CASGSGYTGQLYF	6004	0.0785067		CSAVRDSSTGQLYF	1984	0.0283328		CASSQDPLGGGYEQYF	1834	0.0295802		CASSDWDDSYEQYF	277	0.00342058		CASSQRQGAGTEVF	2835	0.0437601		CASSQGRQATQYF	245	0.00315296		CASSTTPNSDCTF	258	0.00361118		CSSRGGASTEVF	218	0.00275385		CASSHWYYEQYF	199	0.00253376
CASSLRTGGTEVF	5434	0.073654		CASSGTGGGSDYTF	6004	0.0785067		CASSLLGGQGYAEQF	1904	0.0271903		CASGDAEGNQDTQYF	1821	0.0293705		CGASGGEQYF	276	0.00340824		CASSLDKTEVF	2830	0.0436829		CAEGANQDTQYF	245	0.00315296		CASSIGVNYAEQF	258	0.00361118		CVSRRTGPNSDYTF	218	0.00275385		CASSQQGAHNSPLYF	198	0.00252103
CASSWTQNTEVF	5432	0.0736269		CAWSTERDSPLYF	5999	0.0784413		CASTLGVNQDTQYF	1758	0.0251053		CASRARDSANTEVF	1819	0.0293382		CSAGHSNYAEQF	275	0.00339589		CASSLGGEAEQF	2829	0.0436675		CTRSAEGANQDTQYF	245	0.00315296		CTRRDNYEQYF	258	0.00361118		CASSMGDSSYEQYF	217	0.00274122		CSADEGSYNWPLYF	197	0.0025083
CAWSPSNSDYTF	5416	0.07341		CASGDAGTGGAQNTLYF	5992	0.0783498		CASSPGPQDTQYF	1701	0.0242914		CSADANNEK_SF	1814	0.0292576		CASSDARGPSAETPYF	275	0.00339589		CASRRGDAEQF	2829	0.0436675		CASSITGGDSYEQYF	244	0.00314009		CTRSAEGAPLF	257	0.00359719		CSARGGDTQCF	217	0.00274122		CASSFPGRGPTGQLYF	196	0.00249557
CASGDAINSDYTF	5411	0.0733422		CSSLNRGNTEVF	5968	0.078036		CSGGGDQNTLYF	1644	0.0234774		CASSLDKTYEQYF	1813	0.0292415		CSSTAALSNERLF	274	0.00338354		CASSLTGGTQDTQYF	2817	0.0434823		CTRSGPGQANTEVF	244	0.00314009		CSAAGTGVAEQSF	257	0.00359719		CASSWTGYQDTQYF	217	0.00274122		CRADEGSYNSPLYF	195	0.00248283
CASSDAGWGYEQYF	5408	0.0733016		CSGDIYNSPLYF	5967	0.0780229		CASSLGGGNNYAEQF	1642	0.0234488		CASSDSQNTLYF	1804	0.0290963		CTSSLDRANTEVF	273	0.00337119		CASSLGGPSYEQYF	2806	0.0433125		CSADPGGETEVF	244	0.00314009		CASGDWDKEVF	257	0.00359719		CASRPGGLGNTEVF	217	0.00274122		CASSQEGVGGPSAETLYF	195	0.00248283
CASSDPTGSSYEQYF	5375	0.0728543		CASSPGTGTAEQF	5961	0.0779444		CSADNLGQDAQYF	1568	0.022392		CASSPGTGVDTQYF	1784	0.0287737		CSEDNSQNTLYF	272	0.00335884		CASSDVGYEQCF	2781	0.0429266		CASSQGQGNSYEQYF	244	0.00314009		CSAAGAGVAEQF	256	0.00358319		CRAGGQDTQYF	217	0.00274122		CASGQQGAYNSPLYF	194	0.0024701
CASSKGQKDTQYF	5354	0.0725696		CASSSQGAAQDTQYF	5954	0.0778529		CSADRDSYNPPLYF	1553	0.0221778		CASKGTGANERLF	1768	0.0285157		CTYSGDNSQNTLYF	271	0.00334649		CASSLEGAEQF	2778	0.0428803		CSAEGANQGTQYF	244	0.00314009		CAWSHWGNYAEQLF	255	0.00356919		CSARGGDT_YF	216	0.00272858		CSAGQGVNTGQLYF	193	0.00245737
CASSDQQGRGSDYTF	5336	0.0723257		CASRLGGRNTLYF	5943	0.0777091		CTYSADQGRQNTLYF	1511	0.021578		CASSLGQYNYAEQF	1759	0.0283705		CTRSINSGNTLYF	269	0.0033218		CASGDKKEVF	2757	0.0425561		CSGGTGGPGQLHF	244	0.00314009		CASSQDRLGGSQSTLYF	255	0.00356919		CSAPHWVQDTQYF	216	0.00272858		CASS_GQDF	193	0.00245737
CASSQGTDTEVF	5334	0.0722985		CASSQDWVNTGQLYF	5928	0.0775129		CASSQTENTGQLYF	1385	0.0197787		CASSPGQPEVF	1759	0.0283705		CASSLKTTSNTEVF	268	0.00330945		CASSFPGQTEVF	2731	0.0421548		CASSPGTGYYEQHF	244	0.00314009		CASSPGTGSTEVF	255	0.00356919		CSARHWGQDTQYF	216	0.00272858		CSGTERTSAETLYF	192	0.00244464
CASSHPTGDAEQF	5329	0.0722308		CASSPTGGNQDTQYF	5919	0.0773953		CASSLGGQSYEQYF	1376	0.0196501		CGARGTGVNSGNTLYF	1758	0.0283544		CAGSGTSTEVF	267	0.0032971		CASGEGGNQDTQYF	2708	0.0417998		CSAGVGGLYAEQF	243	0.00312722		CSAPRGQDTQYF	255	0.00356919		CTRSAVGTDSDYTF	214	0.00270332		CASSDARDGDEQYF	191	0.0024319
CASSPGTEDTQYF	5312	0.0720003		CASRDSYEQYF	5914	0.0773299		CSADQGSNERLF	1219	0.0174081		CASSRRGLQDTQYF	1745	0.0281447		CSAPGGYGQYF	267	0.0032971		CASGDTSLNERLF	2682	0.0413985		CASSPQGDPNERLLF	243	0.00312722		CSADSYNSPLYF	255	0.00356919		CASGPAGAETLYF	214	0.00270332		CASSGTGVNSDHTF	191	0.0024319
CASSQEGTGAEQYF	5300	0.0718377		CAWSLTSQNTLYF	5912	0.0773037		CASSSPGQGNERLF	1197	0.0170939		CASSLGQGPGQLYF	1711	0.0275963		CASSPGTNSNTEVF	264	0.00326005		CASSRDSSYNSPLYF	2546	0.0392992		CSPYREGGVF	242	0.00311435		CASSIWQTGQLYF	254	0.0035552		CASGDARDTGQLYF	213	0.00269069		CSGQNQDIQYF	190	0.00241917
CASSLGQGSERLF	5265	0.0713633		CASSQALGGQDTQYF	5911	0.0772907		CGAHRSSYEQYF	1155	0.0164941		CASSLGSEQYF	1675	0.0270157		CASSLQTNSNTEVF	262	0.00323535		CASSQGAGLGSYEQYF	2545	0.0392838		CSTRQGANTGVF	242	0.00311435		CRPGQNCAEQF	254	0.0035552		CSETVSNERLCF	213	0.00269069		CASSQEGVGGRGSAETLYF	190	0.00241917
CASSDAGSNTEVF	5257	0.0712549		CSSSPERLF	5905	0.0772122		CTSGETGANTGQLYF	1144	0.016337		CASSSYSSAETLYF	1584	0.025548		CTGSASRDPGGDTQYF	262	0.00323535		CASSTEVQNTLYF	2522	0.0389288		CSPYRGGEVF	241	0.00310148		CSPRQFSNEGLF	254	0.0035552		CSETVSKERLF	213	0.00269069		CASSWGSYAEQF	190	0.00241917
CSSRGWGTSQNTLYF	5254	0.0712142		CASSDKGGRNTQYF	5891	0.0770291		CASSQEVGNTLYF	1140	0.0162799		CASSTTGERAEQF	1538	0.024806		CSASRDPGGDAQYF	260	0.00321066		CASGENTGQLYF	2510	0.0387435		CASSLPGRGNQAQHF	241	0.00310148		CSANSYNSPLCF	254	0.0035552		CANGDGANTEVF	213	0.00269069		CASSRQDTQYF	189	0.00240644
CASSLWGGYAEQF	5253	0.0712006		CASRGVSYEQYF	5890	0.0770161		CASSDAANERLF	1052	0.0150232		CASSDGRGRGSDYTF	1533	0.0247254		CASSGASTEVF	258	0.00318596		CASRTGNSGNTLYF	2410	0.0372		CASRGLGGYAEQF	240	0.00308861		CSADQGAEALYF	253	0.0035412		CASSPPNTEVF	212	0.00267806		CSADEDSYNSPLYF	189	0.00240644
CASSLRDREYAEQF	5249	0.0711464		CASGELGNYAEQF	5881	0.0768984		CASSQDWASAETPYF	1017	0.0145234		CASSDTGDSPLYF	1527	0.0246286		CASSLQGAGNTPYF	258	0.00318596		CASSDAGGDNQAPLF	2391	0.0369067		CAWRRAGANSGNTLYF	240	0.00308861		CSADPAANAEVF	253	0.0035412		CSAPGGRSTGQLYF	212	0.00267806		CVSGDETGGVF	189	0.00240644
CASSEGQVSYEQYF	5249	0.0711464		CASSPSDWDQDTQYF	5880	0.0768853		CASSRDIQDTQYF	1007	0.0143806		CASSPGQNFSNERLF	1523	0.0245641		CGADQEAPLF	258	0.00318596		CASSGDTEVF	2373	0.0366288		CASSQEQGSSYEQYF	239	0.00307574		CASSQSGDNNQDTRYF	253	0.0035412		CASGDARNTRQLYF	212	0.00267806		CASGPTASNERLF	189	0.00240644
CSADRGNSDYTF	5245	0.0710922		CSAGSGQLYF	5876	0.076833		CAGGETGGSTEVF	978	0.0139665		CSADANNERLSF	1518	0.0244835		CASSLKINSNTEVF	257	0.00317361		CASSGTGGVYAEQF	2368	0.0365517		CSVDVGGLYAEQF	239	0.00307574		CASSQSGDDNQDTQYF	253	0.0035412		CASPGDLYEQYF	212	0.00267806		CASGDRGTEDTEVF	187	0.00238097
CAWSLPDNSPLYF	5236	0.0709702		CASSQDGTTSYEQYF	5865	0.0766892		CASGRQGDFGNTLYF	964	0.0137665		CSADANNERSF	1504	0.0242577		CSINSGNTPYF	257	0.00317361		CASSDVGYEQHF	2360	0.0364282		CSARYNSPPYF	239	0.00307574		CSADPAANTEVLF	252	0.0035272		CSETDSNERLF	211	0.00266542		CASSDARGRDEQYF	186	0.00236824
CASSSQGFYAEQF	5226	0.0708347		CSADGLGGPGQLYF	5847	0.0764538		CGAGASQDTQYF	940	0.0134238		CASSWDSSGNTLYF	1456	0.0234835		CSNPTGGPNQGTQYF	255	0.00314891		CASSGDSVSNERLF	2263	0.0349309		CASSLPGRDDQAQHF	238	0.00306287		CSGGRTNTEVF	251	0.0035132		CSATHWGQDTQYF	210	0.00265279		CASSRDISGNTLYF	186	0.00236824
CASSDDWGTYEQYF	5218	0.0707262		CASGVDSQDTQYF	5838	0.0763361		CSARDWGDGQYF	935	0.0133524		CASSAGLGQGTLYF	1446	0.0233222		CSLRGWGTQYF	254	0.00313656		CASSLNGEQYF	2251	0.0347457		CASGAAGGNQDTQCF	238	0.00306287		CSAAGTGVAERF	250	0.00349921		CTRSADWGAYEQYF	208	0.00262753		CSARLGGSSAETLYF	186	0.00236824
CASRRTANTGQLYF	5195	0.0704145		CASSPDNNYAEQF	5830	0.0762315		CSARDWGDERYF	923	0.013181		CASSLGEKDTQYF	1444	0.0232899		CSAGHNNYAERF	254	0.00313656		CASSLGGSQDTQYF	2134	0.0329397		CASSPRTGANSDYTF	238	0.00306287		CASGAWTGQNTSYF	250	0.00349921		CSAVGANSDYTF	208	0.00262753		CASGHRTSAETLYF	185	0.00235551
CASRTGTGNERLF	5193	0.0703874		CASIRDWGVQNTLYF	5802	0.0758654		CSAAQGDTEVF	909	0.0129811		CASSLGGANERLF	1443	0.0232738		CSATGINQAPPF	253	0.00312422		CASSRDVSNERLF	2101	0.0324303		CSPYREGEVLF	238	0.00306287		CSADQYSAETLYF	249	0.00348521		CSADGADTEVF	207	0.00261489		CASGGPQGSNTEVLF	185	0.00235551
CASSVPGQGETEVF	5182	0.0702383		CSADKGEVF	5802	0.0758654		CASTGTGNQAPLF	900	0.0128526		CASSDAGDPPLYF	1408	0.0227093		CSADTGVNQAPLF	253	0.00312422		CASSSGTGGYAEQF	2052	0.031674		CSAPDADAEQF	237	0.00305001		CASSLRDREDGQYF	249	0.00348521		CASSLSWGVQNALYF	206	0.00260226		CASSGLGVTEQF	185	0.00235551
CASSPYWGLQDTQYF	5162	0.0699672		CASSDWGGYAEQF	5768	0.0754208		CTRSAVRDSNTGQLYF	886	0.0126526		CASSPDRISNERLF	1379	0.0222416		CSRDNSQNTLYF	253	0.00312422		CASGDAKDRANSDYTF	2038	0.0314579		CSGTANTEVSF	236	0.00303714		CSAAGTGVAGQF	248	0.00347121		CASSLEGQQDTLYF	204	0.002577		CSADEGSYKSPLYF	184	0.00234278
CASSDARGGTGQLYF	5160	0.0699401		CASGAPSQNTLYF	5752	0.0752116		CASGGTGGSTEVF	852	0.0121671		CASSSQGVQNTLYF	1352	0.0218061		CSVGQGNSVETLYF	251	0.00309952		CASGDELYEQYF	2026	0.0312727		CSPYGEGEVF	236	0.00303714		CASSGRGAEVF	248	0.00347121		CSAPPWGQDTQYF	204	0.002577		CASSVLGGTEQF	183	0.00233004
CASRTGGNQAPLF	5159	0.0699265		CASSPPGGDQDTQYF	5749	0.0751724		CA_SLVGGQNTLYF	801	0.0114388		CARGRRIAETLYF	1352	0.0218061		CASSPGANSYNSPLYF	251	0.00309952		CASSENSYEQYF	1961	0.0302693		CAWGRTFNNQAQHF	236	0.00303714		CAWSHISQILQDRQLGSMTEK_SF	247	0.00345722		CASSHGGLQDTQYF	204	0.002577		CTSSLTGVNQAPLF	183	0.00233004
CASKGQNTEVF	5144	0.0697232		CSAESQNNNQAPLF	5739	0.0750416		CAWSLRVGNTLYF	797	0.0113817		CASSSSRDRNERLF	1349	0.0217577		CSADQGAPLF	250	0.00308717		CASSQRQGAGTEGF	1940	0.0299452		CAWSLRDDTGQLYF	236	0.00303714		CSGGQTNTEVLF	247	0.00345722		CTRSAPGGRNTGQLYF	203	0.00256436		CSTGQGANTGQLYF	182	0.00231731
CSAEQNTEVF	5142	0.0696961		CASSQEDRAYEQYF	5693	0.0744401		CASSGGLDTLYF	787	0.0112389		CATGTGGDSDYTF	1338	0.0215803		CASSLDRVNTEVF	250	0.00308717		CASSDVGCEQYF	1884	0.0290808		CSAAVNTEVF	236	0.00303714		CASSARSQNTLYF	245	0.00342922		CASGADRVNYAEQSF	203	0.00256436		CSARNQTPLF	182	0.00231731
CSADVGGDTEVF	5142	0.0696961		CASTGGPYEQYF	5673	0.0741786		CGALLKDTQYF	763	0.0108961		CASSPGQGEVF	1303	0.0210158		CASSLKTNSTTEVF	250	0.00308717		CSAQDTQYF	1875	0.0289419		CASSPGDSGEQYF	235	0.00302427		CSGGQTDTEVF	245	0.00342922		CSETVCNERLF	203	0.00256436		CASSGAGVNSDYTF	182	0.00231731
CASSQDMTGGENTLYF	5142	0.0696961		CSGTGDTEVF	5658	0.0739825		CASGEGVTDPNSGNTLYF	731	0.0104391		CASSLEGGAHEQYF	1302	0.0209997		CSAGHNNYAEQLF	248	0.00306247		CASGDSSYEQYF	1852	0.0285869		CSAVSQSTLYF	235	0.00302427		CASNQSRDHYAEQF	244	0.00341523		CASSQDTINTGQPYF	202	0.00255173		CSADEGSYNAPLYF	182	0.00231731
CASSAGGGNYAEQF	5136	0.0696148		CASSAGQGNTEVF	5650	0.0738779		CSDPGGADRDTQYF	718	0.0102535		CASSLDRISYEQYF	1294	0.0208706		CSATGVNQAPLF	248	0.00306247		CTSSDVGYEQYF	1852	0.0285869		CSGGAKNTLYF	234	0.0030114		CSAGPAANTEVF	243	0.00340123		CSAGGRGAETLYF	201	0.0025391		CTSSPTASNERLF	180	0.00229185
CASSRPGQNYAEQF	5118	0.0693708		CASSPGQGEGEQYF	5642	0.0737733		CASSLGQRDQAPLF	714	0.0101964		CSADTNNERLF	1290	0.0208061		CTRSASRDPGGDTQYF	248	0.00306247		CASSLTGSNERLF	1843	0.0284479		CAGSQDPAGGHAEQF	234	0.0030114		CASSLRDWGTSAETLHF	241	0.00337324		CASSLPWGVQNTLYF	201	0.0025391		CASSPTASSERLF	180	0.00229185
CASSRSISNERLF	5116	0.0693437		CSADANTEVF	5630	0.0736164		CSSRLGEREQYF	682	0.00973939		CASSPGLGGDTGQLYF	1274	0.0205481		CSADGANTDVF	248	0.00306247		CSADLGSVETLYF	1722	0.0265802		CSKRGWGGETLYF	233	0.00299853		CSTGPDYAF	241	0.00337324		CSADWGASAEVF	201	0.0025391		CASGGPQGSNTEAF	179	0.00227911
CASSVQAYEQYF	5111	0.0692759		CASSQGQGVTEVF	5628	0.0735902		CASGETGGPTEVF	679	0.00969655		CASSSQGSSAETLYF	1242	0.0200319		CASGGGRGNYAEQF	248	0.00306247		CAAKGTGDERLF	1651	0.0254843		CAWSLRDNTGRLYF	233	0.00299853		CRPSQNYAEQF	241	0.00337324		CSAAQGHSGDTLYF	201	0.0025391		CSGTGVNQAPLF	179	0.00227911
CASSDGRGRSNERLF	5111	0.0692759		CASSDPNSPLYF	5628	0.0735902		CASGERRGNEQYF	675	0.00963943		CASSLALGGADEQYF	1241	0.0200158		CSADQSGGDTQYF	247	0.00305012		CVSSDVGYEQYF	1648	0.025438		CASSQGQDTRQLYF	232	0.00298566		CASSHTTDSDYTF	241	0.00337324		CASGLEDANTEVF	200	0.00252647		CASSQGGGEVF	179	0.00227911
CASSDASWGGARAEQF	5097	0.0690862		CSAPHKPSGNTLYF	5612	0.073381		CSADQGRQNALYF	673	0.00961086		CASSSGHTNSDYTF	1238	0.0199674		CSASRGPGGDTQYF	247	0.00305012		CASSDVGHEQYF	1627	0.0251138		CSATVNTEAF	232	0.00298566		CTRSGDREVF	240	0.00335924		CASSLEGQ_DTQYF	200	0.00252647		CASSQDGTTNSDYTF	179	0.00227911
CASSFLREPSAETLYF	5094	0.0690455		CAWSLGANTGQLYF	5611	0.0733679		CSAVRDSNTGQPYF	664	0.00948234		CASSPQGNGNTLYF	1232	0.0198706		CASSRGLGGRGAEQF	246	0.00303778		CSGGRNTEDF	1624	0.0250675		CASSQDLSQNTSYF	231	0.00297279		CRDDYEQYF	240	0.00335924		CSAGDRGAETPYF	199	0.00251383		CASSDAGDRDEQYF	178	0.00226638
CASSPRLRGGQDTQYF	5093	0.069032		CAWSLGSTGQLYF	5610	0.0733549		CASGEAGGSTEVF	664	0.00948234		CASSPDKSYEQYF	1199	0.0193384		CAGSDARGPSAETLYF	245	0.00302543		CASSHDRGLEQYF	1622	0.0250367		CSAPGVDAEQF	230	0.00295992		CTRSTGPDYTF	239	0.00334524		CASSGDLYGQYF	199	0.00251383		CASSQDTGGYAEQLF	178	0.00226638
CASSQDSNQDTQYF	5087	0.0689506		CASSQDGTAYNSPLYF	5597	0.0731849		CSADRGRQNTLYF	661	0.0094395		CSTDANNERLF	1195	0.0192739		CASSLDRANTEVCF	245	0.00302543		CRAGDSQNTLYF	1614	0.0249132		CASSMISYAEQF	228	0.00293418		CASSATPNSDYTF	239	0.00334524		CSETVSNESLF	199	0.00251383		CASSWDSYAEQLF	178	0.00226638
CASSDWGDYAEQF	5083	0.0688964		CASRTGDNSPLYF	5583	0.0730018		CASSGQGNSGNTLYF	644	0.00919673		CSADVNNERLF	1181	0.0190481		CSFSGTEVLF	244	0.00301308		CAAEGTGDERLF	1551	0.0239407		CSADPEGETGVF	227	0.00292131		CASSIIWGGAGQDTQYF	239	0.00334524		CASSQGGLQDAQYF	199	0.00251383		CASSRWYYEQYF	178	0.00226638
CSAEDSYTEVF	5066	0.068666		CASSQTTSAETLYF	5582	0.0729887		CGASVLGNYAEQF	643	0.00918245		CASSFRGPEDTQYF	1174	0.0189352		CASSGWDNSYEQYF	244	0.00301308		CSAEGQNSDYTF	1537	0.0237246		CSATGDSAEALYF	227	0.00292131		CSGLGGGDAQYF	238	0.00333125		CRAGDWGDTQYF	198	0.0025012		CASSGLGGTQQF	178	0.00226638
CASSQGQGNERLF	5050	0.0684491		CAWNRDRNSPLYF	5578	0.0729364		CSADQGRQSTLYF	639	0.00912532		CASSDAGDSPLHF	1154	0.0186126		CASSDWDNPYEQYF	243	0.00300073		CASSDATISNERLF	1491	0.0230146		CSADSGGSYAEQF	227	0.00292131		CSGDRGVF	238	0.00333125		CASSLSWGVQNTSYF	198	0.0025012		CNGQNQDTQYF	177	0.00225365
CASSPGLGGYEQYF	5033	0.0682187		CASGAQGSNQAPLF	5571	0.0728449		CSADRDSYSSPLYF	629	0.00898252		CASSQDLSYNNQAPPF	1150	0.0185481		CSINPGNTLYF	243	0.00300073		CASGETGNYNSPLHF	1270	0.0196033		CVSSQGQDTGQLYF	227	0.00292131		CSADPAASTEVF	238	0.00333125		CASSPGGAQYF	197	0.00248857		CVSSQDGTANSDYTF	177	0.00225365
CSAGGGGNERLF	5029	0.0681645		CASGVQTNSDYTF	5548	0.0725442		CASRGGGDAEQF	624	0.00891111		CASSFRDWGYEQYF	1135	0.0183062		CRVSGGATEVF	243	0.00300073		CSDVGYEQYF	1254	0.0193563		CSTRQGANTEVLF	226	0.00290844		CSAAGDEQYF	236	0.00330325		CSSRGGANTEVLF	197	0.00248857		CASSGLGGPSAETLYF	176	0.00224092
CASGDARHPNSDYTF	5025	0.0681103		CASSPATEVF	5544	0.0724919		CASSLGQDNYAEQF	610	0.00871118		CSVDANNERLF	1111	0.0179191		CAGSDWDNSYEQYF	242	0.00298838		CGAREGASYEQYF	1229	0.0189704		CSAAGGAGNSPPYF	226	0.00290844		CSDRFPNERLF	236	0.00330325		CTRSAGDRGAETLYF	196	0.00247594		CTYSARLGGPSAETLYF	175	0.00222818
CASSDRGGANSDYTF	5023	0.0680832		CAWRQANTEVF	5538	0.0724134		CSAGDTEIF	610	0.00871118		CASSRLGVQDTQYF	1097	0.0176933		CASSGGSNYAEQF	242	0.00298838		CASAGGPGQLYF	1209	0.0186617		CTRSGGTKNTLYF	225	0.00289557		CASSALQGWAETPYF	236	0.00330325		CASSLSWGVQSTLYF	195	0.00246331		CSTRNQAPLF	173	0.00220272
CASSQDDWGGSQNTLYF	5013	0.0679476		CASGEPGQGRSQNTLYF	5532	0.072335		CASSDNQGAYEQYF	610	0.00871118		CASSPLGGTSQNTLYF	1084	0.0174836		CASSDWDNSYGQYF	240	0.00296368		CASRGQGANTEVF	1187	0.0183221		CSADARGTLYF	225	0.00289557		CSSRGLVSNERLF	236	0.00330325		CASSPDRDGNTPYF	195	0.00246331		CASGDTNSDYAF	173	0.00220272
CASSGLGGQDTQYF	4984	0.0675545		CASSLGQGNTLYF	5530	0.0723088		CASGETGGSTEVLF	609	0.0086969		CNADANNERLF	1063	0.0171449		CSAGRYNSPLYF	239	0.00295133		CAWDLGGRQNTLYF	1185	0.0182913		CSAGALNQDTQYF	225	0.00289557		CSALEGLAEQF	235	0.00328926		CSAVAGGASAETPYF	195	0.00246331		CASGGPQGPNTEVF	173	0.00220272
CASRPYRGQNTLYF	4982	0.0675274		CARDSNQAQHF	5514	0.0720996		CSADQGRQNTSYF	607	0.00866834		CASSFDNYEQYF	1047	0.0168868		CASSLKTHSNTEVF	239	0.00295133		CASSDEKNTLYF	1176	0.0181523		CSATGGSAETLYF	225	0.00289557		CASKTGTGATGQLYF	235	0.00328926		CSAGDRGAEALYF	194	0.00245067		CSARLGANTGQLYF	173	0.00220272
CASGGTGGNQDTQYF	4981	0.0675139		CASSQDPRGEDTQYF	5505	0.0719819		CASSLPLGGLGTGQLYF	605	0.00863978		CASSPGLSYEQYF	1016	0.0163868		CSAAGINQAPLF	238	0.00293899		CASSQVQTSTETLYF	1112	0.0171645		CAGSQDLANTEVF	224	0.00288271		CASSQSRDNYAEQF	235	0.00328926		CRTGGRDTQYF	194	0.00245067		CAGRQHYAEQF	172	0.00218999
CASSTGQNTLYF	4979	0.0674868		CASGEGTITEVF	5499	0.0719035		CSVGDTEVF	600	0.00856838		CTYSADANNERLF	1007	0.0162417		CSAEGLGGSQNTSYF	238	0.00293899		CSAGPFNSGNTLYF	1091	0.0168403		CSASGTGAEQSF	223	0.00286984		CASSQARSRNTLYF	235	0.00328926		CASSSGHSGNTLYF	194	0.00245067		CASNQDGTANSDYTF	171	0.00217725
CASSSGQYEQYF	4978	0.0674732		CASSLRTVNQDTQYF	5498	0.0718904		CSAEGGGASAETLYF	594	0.00848269		CASSLAAAGTISYEQYF	996	0.0160643		CGAGTGVNQAPLF	237	0.00292664		CASSDVGYE_YF	1064	0.0164235		CSADGAEQSF	223	0.00286984		CGAEGAPLF	235	0.00328926		CSAERRGTGQLYF	194	0.00245067		CVSSQEGVGGRRSAETLYF	170	0.00216452
CASGRLGSSAETLYF	4966	0.0673106		CAWRGTSSAETLYF	5479	0.0716419		CASGEGQGNEQYF	588	0.00839701		CADANNERLF	977	0.0157578		CRVGQGNSAETLYF	236	0.00291429		CASSEGGRTETLYF	1055	0.0162846		CSGPGQANTEVLF	223	0.00286984		CASSYLGSSQNTLYF	234	0.00327526		CASSLDRGANTGQHYF	194	0.00245067		CASSDETGGVF	170	0.00216452
CASSPDRNTEVF	4960	0.0672292		CSASGTGDSPLYF	5467	0.071485		CSADQGGNERSF	587	0.00838273		CASSDAGDSPLCF	974	0.0157094		CSATGTNQAPLF	232	0.00286489		CSAASNSDYTF	1037	0.0160068		CSADWGSYGQYF	223	0.00286984		CASGESGGGQNTLYF	234	0.00327526		CASSLLGRGYAEQF	193	0.00243804		CAGSQDGGEVF	170	0.00216452
CAWSQGGYEQYF	4956	0.067175		CANSQGHYNYAEQF	5464	0.0714458		CSADRDSYNSPPYF	582	0.00831133		CASSSRSSNERLF	941	0.0151772		CSADLGGDEQYF	232	0.00286489		CASSDMGYEQYF	999	0.0154202		CASSQDPAGGHAERF	222	0.00285697		CSASRGQDT_YF	234	0.00327526		CASRDRGQAPLF	193	0.00243804		CSAGQGANTGQF	170	0.00216452
CASSLSRPRGGNERLF	4952	0.0671208		CASSPWGLRTGQLYF	5452	0.0712889		CGARELGSAETLYF	581	0.00829705		CASGDGANTEVLF	932	0.015032		CSAGQGNSPLYF	231	0.00285255		CASSDGGYEQYF	991	0.0152967		CASSMIANTEVF	222	0.00285697		CASSEGQANAGQLYF	234	0.00327526		CASSDGLTLYF	192	0.00242541		CSGTGKTSAETLYF	169	0.00215179
CASNQGGDERLF	4940	0.0669582		CSARNERLF	5423	0.0709097		CASRDNERLF	578	0.0082542		CGARKRNYAEQF	927	0.0149514		CASRLKTNSNTEVF	231	0.00285255		CASSSGLGVNYAEQF	953	0.0147102		CASSQDLANTEVSF	221	0.0028441		CASARDNCAEQF	233	0.00326126		CASSQGGAGVDTQYF	192	0.00242541		CASCGLGGTEQF	169	0.00215179
CASSDAAGGSYEQYF	4939	0.0669446		CASSFNNQDTQYF	5422	0.0708966		CASGETGGSTEAF	577	0.00823992		CASSDVGDSPLYF	894	0.0144191		CTCRGPDYTF	231	0.00285255		CSADPFNSGNTPYF	895	0.0138149		CASSIAPVSNERLF	220	0.00283123		CTRSGGQTNTEVF	232	0.00324726		CASSLEEQQDTQYF	191	0.00241278		CASSQEGVGRRRSAETLYF	167	0.00212632
CASSRRDGQLYF	4938	0.066931		CAWSPRLGETQNTLYF	5419	0.0708574		CSAVRDSNAGQLYF	557	0.00795431		CASSRTEISNERLF	878	0.0141611		CSLDRANTEVF	231	0.00285255		CASSDVDYEQYF	870	0.013429		CASSQGLANTEVF	220	0.00283123		CSAELNEK_SF	231	0.00323327		CASSPQGANSNYTF	190	0.00240014		CASSRTINQDAQYF	166	0.00211359
CASSSLGGSAETLYF	4937	0.0669175		CAWGQGANTGQLYF	5416	0.0708182		CTRSAGQYNSPLYF	557	0.00795431		CASSLEGAYQDTQYF	877	0.0141449		CAWSLTGGVYAGQF	230	0.0028402		CASSVGWGISNERLF	856	0.0132129		CSATGDEQHF	220	0.00283123		CTCRGTPYEQYF	231	0.00323327		CASSDTNSDCTF	190	0.00240014		CAGSRTINQDTQYF	166	0.00211359
CASSLEPGQKNTLYF	4932	0.0668497		CASSRDRNSYEQYF	5412	0.0707659		CGARGYYAEQF	553	0.00789719		CASSLPRAFSNERLF	866	0.0139675		CAGGEGTGQDTQYF	230	0.0028402		CASSLERGLQDTQYF	844	0.0130277		CSGHTSQNTLHF	220	0.00283123		CASSTRSQSTLYF	230	0.00321927		CASSGDLYEQHF	190	0.00240014		CTSSQGGGRPYEQYF	166	0.00211359
CASSRTANSDYTF	4911	0.0665651		CASSSDSQDTQYF	5402	0.0706351		CGARDRDNYAEQF	536	0.00765442		CASSRGVGQNTLYF	865	0.0139514		CSFSGTGSYEQSF	229	0.00282785		CSARTGNEGLF	825	0.0127344		CASSIVTGVAEQF	218	0.00280549		CSSSPGGSAETLHF	230	0.00321927		CASSPQGANSDYAF	189	0.00238751		CSADEGSYNSLLYF	166	0.00211359
CASGAGLGDTQYF	4911	0.0665651		CASGDLGVQDTQYF	5392	0.0705044		CASGGASNERLF	535	0.00764014		CVSSDAGDSPLYF	849	0.0136933		CAGGGGQGNYAEQF	228	0.0028155		CGASLGGAETLYF	812	0.0125338		CASGAAGGNQDTQHF	218	0.00280549		CANSQDEGYEQYF	230	0.00321927		CAWSLGALSNERLF	189	0.00238751		CSGQN_DTQYF	164	0.00208813
CASTDSQNTLYF	4883	0.0661856		CASSQDPGEATEVF	5386	0.0704259		CASGDARGRSDSDYTF	526	0.00751161		CASSRTGNYAEQF	839	0.013532		CRADRTGGSEQYF	227	0.00280315		CSAPGGTGQNTLYF	797	0.0123022		CSAPGTDAEQF	218	0.00280549		CGADQYNAETLYF	229	0.00320527		CASRRIGPNSDYTF	189	0.00238751		CSGTGRTSAETQYF	164	0.00208813
CASSQDWGYEQYF	4876	0.0660907		CASGDGTGGNSDYTF	5367	0.0701775		CASSRDPQGGNTEVF	522	0.00745449		CASSLTHSNERLF	834	0.0134514		CAGSQGGREQYF	227	0.00280315		CASSNVGYEQYF	739	0.011407		CSAEGANQDAQYF	218	0.00280549		CSAVGDERYF	228	0.00319128		CSADRAGTEVF	189	0.00238751		CTSSQEGGRSYEQYF	164	0.00208813
CAWSPGQSYEQYF	4871	0.0660229		CAWSATDRGREQYF	5366	0.0701644		CGADLGRQNTLYF	506	0.007226		CAGSLDKSYEQYF	789	0.0127256		CASSGARGPSAETLYF	226	0.0027908		CASSARTGNSDYTF	736	0.0113607		CSKRDWGGETPYF	217	0.00279262		CSADQYNAETLHF	228	0.00319128		CAGSPGGLYEQYF	188	0.00237488		CASSQGGGRPYEQYF	164	0.00208813
CASSPSTGGYAEQF	4862	0.0659009		CASSQGQNNQAQHF	5340	0.0698244		CAWSPQGANSGYTF	505	0.00721172		CASSDAGDSPLSF	788	0.0127095		CKPGLGDAEQSF	226	0.0027908		CASGDAGSSTEVF	732	0.0112989		CGAEALNQDTQYF	217	0.00279262		CSAVGDEQCF	228	0.00319128		CSAAWGDEQYF	187	0.00236225		CTCSLTGVNQAPLF	163	0.00207539
CASSSPGGNYAEQF	4854	0.0657925		CASGDADRGYSDYTF	5334	0.069746		CGARRGSQNTLYF	500	0.00714032		CASSDARDSPLYF	766	0.0123546		CGAGHNNYAEQF	223	0.00275376		CTRSVRDWGAETLYF	718	0.0110828		CASSLGQGYEQYF	217	0.00279262		CASSGIDQDTQYF	228	0.00319128		CASGGQNSYNSPHYF	187	0.00236225		CPSSGLGGTEQF	163	0.00207539
CASGDRTGGGQNTLYF	4851	0.0657518		CASSQEGTGGSYEQYF	5304	0.0693537		CASGETGGATEVF	485	0.00692611		CTGSASGNEQYF	755	0.0121772		CSAGQEAPLF	223	0.00275376		CASRDVGYEQYF	716	0.0110519		CSADGAERF	216	0.00277975		CSANSYNPPLYF	227	0.00317728		CASSGGFTLYF	187	0.00236225		CNAGVNTLYF	163	0.00207539
CASSDAGLGSQNTLYF	4843	0.0656434		CASSPGGPEVF	5300	0.0693014		CGARSSQNTLYF	485	0.00692611		CTSSDAGDSPLYF	731	0.0117901		CSAEGPGGSQNTLYF	222	0.00274141		CASNDVGYEQYF	703	0.0108513		CSGTVNTEVF	216	0.00277975		CGLGGETLYF	226	0.00316328		CASSQEEYYAEQSF	187	0.00236225		CSADEGSYHSPLYF	163	0.00207539
CASSLHERLF	4823	0.0653723		CASSGGQANSDYTF	5298	0.0692752		CAAGTGNTEVF	478	0.00682614		CGAKNWGNQDTQYF	725	0.0116934		CSVGQGNSTETLYF	221	0.00272906		CGLDGNTEVF	684	0.010558		CTRSAGGDSPLYF	216	0.00277975		CSAARETYAERF	225	0.00314929		CSDTVSNERLF	187	0.00236225		CASSGLGGTDQF	163	0.00207539
CASSLDGVGEQYF	4816	0.0652774		CASSPTGGAETLYF	5292	0.0691968		CGARDWGVGKDTQYF	476	0.00679758		CASSCGRESNYAGQF	721	0.0116288		CSAEGQGTQYF	220	0.00271671		CASSYRGYEQYF	677	0.0104499		CSTRQGANTEAF	216	0.00277975		CSGGQTNAEVF	224	0.00313529		CGADREQYF	187	0.00236225		CASSLGYYEQYF	162	0.00206266
CASGDAPSQNTLYF	4810	0.0651961		CSPGGISNERLF	5273	0.0689483		CGARAHNQDTQYF	474	0.00676902		CSAVTGGRWDTQYF	703	0.0113385		CQGAENTEVF	219	0.00270436		CGARRQSNSDYTF	675	0.0104191		CSAEGASQDTQYF	215	0.00276688		CAWSLGTGRDE_YF	224	0.00313529		CASSLSWGAQNTLYF	187	0.00236225		CASSHIWGHEQYF	162	0.00206266
CASSQGGTGNTEVF	4806	0.0651419		CASSGTENTGQLYF	5264	0.0688307		CTSSAAQGNTEVF	470	0.0067119		CASPLDKSYEQYF	700	0.0112901		CASSLRTNSDYTF	218	0.00269201		CGARTGLYAEQF	659	0.0101721		CSGTANTGVF	215	0.00276688		CSADRYNAETLYF	224	0.00313529		CSADPGHDTLYF	187	0.00236225		CASGDTNPDYTF	162	0.00206266
CAWSLAGGSQNTLYF	4797	0.0650199		CASSQDWGGSSEQYF	5259	0.0687653		CSAAQGNTEAF	468	0.00668334		CASSLGKSYEQYF	672	0.0108385		CAGSQGLGGRGAEQF	217	0.00267966		CARSDVGYEQYF	646	0.00997144		CSKRDWGGETLHF	215	0.00276688		CSDRFSNERLLF	223	0.00312129		CASRRTGTNSDYTF	186	0.00234961		CSGTRRTSAETLYF	161	0.00204993
CASSLVEQYF	4797	0.0650199		CASSRRDRGQDTQYF	5255	0.068713		CGARGTGGYAEQF	466	0.00665477		CASSDAGDSLLYF	666	0.0107418		CSAAQSTEVF	216	0.00266732		CGARPKNTGQLYF	608	0.00938489		CTRSPYREGEVF	214	0.00275401		CASSHRDWATGQPYF	222	0.0031073		CSAPGGANAGQLYF	186	0.00234961		CNADEGSYNSPLYF	161	0.00204993
CASGGDRNTGQLYF	4792	0.0649521		CASSQDPGQDYEQYF	5243	0.0685561		CTRSADQGRQNTLYF	461	0.00658337		CASSGTGVGNTLYF	665	0.0107256		CASSFPGGDSDYTF	215	0.00265497		CASSDVGYVQYF	605	0.00933858		CASSQDLSQNALYF	214	0.00275401		CGANSYNSPLYF	222	0.0031073		CAPGGANTGQLYF	185	0.00233698		CASSLWYYVQYF	160	0.0020372
CASSQGEQYF	4788	0.0648979		CASSQGTGGSDYTF	5236	0.0684645		CASGGGGHFSGNTLYF	454	0.00648341		CASSFRGWGYAEQF	662	0.0106772		CSVGQRNSAETLYF	214	0.00264262		CGARDNSYNSPLYF	603	0.00930771		CSDRQGDTEVF	212	0.00272827		CASSQSGDNNQDAQYF	222	0.0031073		CASSIRDEQYF	185	0.00233698		CNASRGQNTLYF	160	0.0020372
CASSHRDWGTSAETLYF	4785	0.0648572		CASSLGGIAEQF	5235	0.0684515		CGARKGYTEVF	450	0.00642628		CASSLDKGYEQYF	650	0.0104837		CASSLDWGNTGQLYF	214	0.00264262		CGAREDNNQAPLF	602	0.00929227		CASSQDPAGGHAGQF	212	0.00272827		CASSPGTGNAEVF	221	0.0030933		CIAPHWGQDTQYF	184	0.00232435		CNGTGRTSAETLYF	159	0.00202446
CASRGGGAETLYF	4780	0.0647895		CAWSGGANSDYTF	5233	0.0684253		CGARDWGYAEQF	440	0.00628348		CASSRSGGYQDTQYF	640	0.0103224		CASSLKTNSYNSPLYF	214	0.00264262		CASSFLLGAETLYF	579	0.00893725		CASSQGRANTGQLYF	212	0.00272827		CAWSHWGNYAEQSF	221	0.0030933		CSADIRGGGDTQYF	184	0.00232435		CASGGPQGSSTEVF	159	0.00202446
CASSQDGDTQYF	4777	0.0647488		CAWSLHYNSPLYF	5217	0.0682161		CSADQGR_NTLYF	432	0.00616923		CASSRDEGGNSDYTF	629	0.010145		CASNLDRANTEVF	214	0.00264262		CSADPFNSGSTLYF	575	0.00887551		CSAGRANTGQLYF	211	0.00271541		CSALGGLAERF	220	0.0030793		CSSRGGANTEVSF	184	0.00232435		CASSWDSYAGQF	159	0.00202446
CASRPGQGGQDTQYF	4768	0.0646268		CSGTGEQYF	5212	0.0681507		CTRSADRDSYNSPLYF	424	0.00605499		CANSDAGDSPLYF	626	0.0100966		CSADGDRAPAETPYF	212	0.00261792		CSAGGTNTGRLYF	556	0.00858223		CASSTTGSNERLF	211	0.00271541		CASSQESSAETPYF	220	0.0030793		CSSRGGANTEAF	183	0.00231172		CTSGDETGGVF	158	0.00201173
CAWRWDIQDTQYF	4764	0.0645726		CASSDGDKNTEVF	5188	0.0678369		CASSDENTLYF	423	0.00604071		CASSRGSSGTLYF	604	0.00974178		CASSDRADYTF	211	0.00260557		CASSDVGYKQYF	531	0.00819634		CSDRQGNTEAF	210	0.00270254		CSAELNEGLF	220	0.0030793		CASSLDRGDSGNTPYF	182	0.00229909		CASSHPGTEVLF	158	0.00201173
CAWSLGGANTEVF	4722	0.0640033		CAWSLQGSNEQYF	5187	0.0678238		CASSQTGSTGQLYF	416	0.00594074		CASSLWGNSYNSPLYF	598	0.009645		CAGSSLGDYEQYF	210	0.00259322		CASSWGGQYF	529	0.00816547		CSAPGADVEQF	210	0.00270254		CSDRFSNEK_SF	219	0.00306531		CASSPDGDGNTLYF	182	0.00229909		CASSQQDTRYF	158	0.00201173
CASGGTSAETLYF	4715	0.0639084		CASSSDRGDTQYF	5172	0.0676277		CSAVRDSNTGRLYF	412	0.00588362		CSDAGDSPLYF	594	0.00958049		CASSLKTNSHTEVF	207	0.00255618		CASSDVGYEPYF	519	0.00801111		CSADAGGLYAEQF	210	0.00270254		CASSKQGISNERLF	219	0.00306531		CASGGLGGTEQF	182	0.00229909		CASSGLGGNEQF	158	0.00201173
CASGGQASAETLYF	4709	0.0638271		CSADPISNERLF	5151	0.0673531		CASSGAQNQNTLYF	406	0.00579794		CAGSPDKTYEQYF	591	0.0095321		CASSPDSSYNSPLYF	207	0.00255618		CGATRDSSYEQYF	518	0.00799568		CANMSQGRTLYCTCSAGDNYEQYF	209	0.00268967		CGGDREVF	219	0.00306531		CASSLLGQGYAGQF	181	0.00228645		CSARLGRPSAETLYF	157	0.001999
CASGELGDSYEQYF	4709	0.0638271		CASSQGTGGDTQYF	5147	0.0673008		CGAVRDSNTGQLYF	399	0.00569797		CASSLGQSEQYF	590	0.00951597		CASSQTGGVGTEVF	207	0.00255618		CGAREQGIERLF	517	0.00798024		CSATGDEQF	209	0.00268967		CASSPGQNNSPLCF	218	0.00305131		CASSPDRGDSGNTLYF	180	0.00227382		CASGDTNSDHTF	157	0.001999
CASSGGSNSDYTF	4704	0.0637593		CASSQERAGGYEQYF	5131	0.0670916		CSADRNSDYAF	393	0.00561229		CASSPGKTYEQYF	587	0.00946759		CASSLDKANTEVF	206	0.00254383		CSAGTGNERLF	504	0.00777958		CASSPGDWGYEQYF	209	0.00268967		CSASRGQDTQCF	218	0.00305131		CASSLSWGRGTEVF	180	0.00227382		CSAGVNTMYF	157	0.001999
CSADSRPERLF	4700	0.0637051		CASSQGLGVETLYF	5119	0.0669347		CSADGPIEQYF	390	0.00556945		CASSDAGASPLYF	585	0.00943533		CASGGGQGSYAEQF	206	0.00254383		CGARVAETLYF	495	0.00764066		CSADSGGNYAEQSF	208	0.0026768		CGAERYNSPLYF	218	0.00305131		CASSPQGASSDYTF	180	0.00227382		CASSHIWGYEQHF	156	0.00198627
CASGGLGGGVAEQF	4683	0.0634747		CASSGYNSPLYF	5113	0.0668562		CGARDPRGSAETLYF	386	0.00551232		CASSPDKAYEQYF	580	0.00935469		CSAGRNNYAEQF	205	0.00253148		CASGGGQGGGNTLYF	485	0.0074863		CASSGDSQNTLYF	207	0.00266393		CSADRGHTGQLYF	218	0.00305131		CAWSRGAFSNERLF	180	0.00227382		CSG_NQDTQYF	156	0.00198627
CASSPPGTGGAETLYF	4678	0.0634069		CASGEPREDERLF	5099	0.0666732		CGARDRDRGRGNTLYF	385	0.00549804		CASSDAQ_CVASFTLQNSYEQYF	578	0.00932243		CSADRGGAPLF	205	0.00253148		CTRSADPFNSGNTLYF	480	0.00740912		CSADVGGLYAGQF	207	0.00266393		CSADQYNAEALYF	218	0.00305131		CASPLSWGVQNTLYF	179	0.00226119		CASNQQGAYNSPLYF	155	0.00197354
CASGDAGGSNERLF	4677	0.0633934		CASSQGLVYAEQF	5093	0.0665947		CASSPRDNYVQYF	381	0.00544092		CASSGTTGNTLYF	575	0.00927404		CSADGGRAPAETLYF	204	0.00251913		CASGGQNSNERLF	455	0.00702323		CGATVNTEVF	207	0.00266393		CGADQGAETLYF	217	0.00303731		CACRRTGPNSDYTF	178	0.00224856		CASGDTSSDYTF	155	0.00197354
CASSPGTVSNERLF	4668	0.0632714		CASSQDWASAETLYF	5090	0.0665555		CASSQDGGGTEVF	381	0.00544092		CASSRDRTGNYEQYF	558	0.00899985		CASSLETGNTEAF	204	0.00251913		CASGDQGNSGNTLYF	453	0.00699236		CASRPLGGYAEQSF	206	0.00265106		CSVDNYEQYF	216	0.00302332		CASSLGDRDYAEQF	178	0.00224856		CSADEGSYNSRLYF	155	0.00197354
CASRGGANTEVF	4659	0.0631494		CASSQDWDNNERLF	5086	0.0665032		CSAVRDSDTGQLYF	380	0.00542664		CASSLDKSYGQYF	550	0.00887082		CASSRDRGQRYAEQF	203	0.00250678		CTSSADPFNSGNTLYF	448	0.00691518		CSADPVNTLHF	206	0.00265106		CAWSLGTGDDAQYF	215	0.00300932		CSEPGQSNERLF	178	0.00224856		CSAGQGANIGQLYF	155	0.00197354
CASILRGGYAEQF	4653	0.0630681		CASSFLGPYEQYF	5081	0.0664378		CSAEYSSPLYF	378	0.00539808		CASSPDKTYGQYF	545	0.00879018		CASSDAWGPSAETLYF	202	0.00249443		CSGLRGPQNTLYF	444	0.00685344		CSAEREENSPPYF	206	0.00265106		CSETGPRDTQYF	214	0.00299532		CSAGREQYF	177	0.00223592		CSARLGRTSAETLYF	155	0.00197354
CASSQGQGYTEVF	4633	0.062797		CAWSPGLGGRNTLYF	5066	0.0662417		CTRRRQGASYNSPLYF	369	0.00526955		CASSGLGAQDTQYF	535	0.00862889		CASSQGGGEQYF	202	0.00249443		CAWSLGGSAETPYF	424	0.00654472		CASGQDPAGGHAEQF	206	0.00265106		CAGSESGGGQNTLYF	214	0.00299532		CASSDTGGGLYF	177	0.00223592		CTGSQGGGRSYEQYF	155	0.00197354
CSAEAGGARDTQYF	4629	0.0627428		CASSQECWGAETLYF	5059	0.0661501		CSAGRDSYNSPLYF	368	0.00525527		CASSHDWGGYEQHF	534	0.00861276		CASGGGQGNYAEQLF	201	0.00248208		CASSVQGADTEVF	423	0.00652929		CSAGPVNTLYF	205	0.00263819		CSADFGRNTGRLYF	214	0.00299532		CSADWGGAAETPYF	176	0.00222329		CASSQDGTVNSDYTF	154	0.0019608
CASGPDWLYAEQF	4593	0.0622548		CASSQGTYAEQF	5052	0.0660586		CSAARDSNTGQLYF	365	0.00521243		CASSDAGDSSLYF	533	0.00859663		CASSDWDQDTQYF	200	0.00246974		CSARTGSERLF	417	0.00643667		CSATVNAEVF	205	0.00263819		CASSTRSQNTLHF	214	0.00299532		CASSQDVGARAEQSF	176	0.00222329		CASSHIWEYEQYF	153	0.00194807
CASATRDRGAETLYF	4592	0.0622413		CAWSRDNNERLF	5050	0.0660325		CGARDGGLGENTLYF	364	0.00519815		CASSTQGALEQYF	533	0.00859663		CASSQEWTITEVF	200	0.00246974		CASRPPGQTEVCF	413	0.00637493		CTRSTRQGANTEVF	204	0.00262532		CASSRQGGQDTQYF	213	0.00298133		CASSGGLYEQYF	176	0.00222329		CSAGQEANTGQLYF	153	0.00194807
CASSFRDWGAYEQYF	4576	0.0620244		CASSDETLSNERLF	5045	0.0659671		CASSLSSYEQYF	359	0.00512675		CASSDAEDSPLYF	524	0.00845148		CSSSRNNQGTQYF	199	0.00245739		CASSDVAYEQYF	412	0.00635949		CASSIGTGGNYAEQF	204	0.00262532		CAWSHWGDYAEQF	212	0.00296733		CASSPGGLYGQYF	175	0.00221066		CASSPTASNERLLF	153	0.00194807
CASTGANSDYTF	4575	0.0620108		CASSQGGTSETLYF	5044	0.065954		CASGETGGSTEVSF	359	0.00512675		CASSLDKSYERYF	523	0.00843535		CAWSLAGGVYAEQF	198	0.00244504		CALTGGTNERLF	410	0.00632862		CSGPGQANAEVF	204	0.00262532		CASSRSPGTVYEQYF	212	0.00296733		CSADWGAYGQYF	175	0.00221066		CASSQEGVGGRRSAGTLYF	152	0.00193534
CAWSPSNERLF	4573	0.0619837		CASGPGLGLGQLYF	5040	0.0659017		CASGDAPNERLF	357	0.00509819		CASTRLGGRSEQF	517	0.00833857		CTRSADGDRAPAETLYF	198	0.00244504		CGARGISNERLF	406	0.00626688		CASSSGLGGRRQDTQYF	204	0.00262532		CVSSTTPNSDYTF	211	0.00295333		CTRSAGTGNTEVF	175	0.00221066		CASSDALNSGYTF	152	0.00193534
CASSDDGQGYEQYF	4564	0.0618617		CASSDFGGYNYAEQF	5040	0.0659017		CSAGQGRQNTLYF	355	0.00506962		CASSGGNTLYF	507	0.00817729		CSATGGAYEQCF	197	0.00243269		CASSDVGYEQ_F	405	0.00625145		CSGTGGDTEVF	204	0.00262532		CSAPGGLAEQF	210	0.00293933		CASGAGRVNYAEQF	174	0.00219803		CASSQEGVGGRRNAETLYF	152	0.00193534
CASSEDRTNTEVF	4559	0.061794		CASSQVNTEVF	5040	0.0659017		CASGDGGGQDAQYF	354	0.00505534		CSADGRNTEAF	506	0.00816116		CSARGSNYAEQF	196	0.00242034		CASSDEGYEQYF	404	0.00623601		CASGLPGRDNQAQHF	204	0.00262532		CSADQGHAGQLYF	209	0.00292534		CSAGANT_VF	174	0.00219803		CASSPAASNERLF	151	0.00192261
CAWRPGTGGPQNTLYF	4557	0.0617669		CASGEQGSQNTLYF	5039	0.0658886		CASSEDRTNERLF	351	0.0050125		CASSDAGDLPLYF	503	0.00811277		CASSGTSTEAF	196	0.00242034		CTRSDRGPNTEVF	403	0.00622057		CSAPGADAKQF	204	0.00262532		CSADQGHTGQPYF	209	0.00292534		CASSGAGTGDAEQF	174	0.00219803		CSAVEGSYNSPLYF	151	0.00192261
CASGLQGGKTNTEVF	4553	0.0617126		CSASNSGNTLYF	5027	0.0657317		CSAAQGNTEVLF	351	0.0050125		CASSQGNSYNSPLYF	501	0.00808051		CMAPSNERLF	195	0.00240799		CSARAGNERLF	401	0.0061897		CAWSPRDNTGQLYF	203	0.00261245		CASSESGGDQNTLYF	208	0.00291134		CASSGDPYEQYF	174	0.00219803		CSAGQGANTG_LYF	151	0.00192261
CASGDTVGGRQNTLYF	4553	0.0617126		CASSDWGSQNTLYF	5018	0.065614		CASGQGGDTEVF	350	0.00499822		CASSPDRGANERLF	495	0.00798374		CASSLVGTGTEVF	195	0.00240799		CASSLLGDQDTQYF	398	0.0061434		CASSQDLANTEVLF	203	0.00261245		CSTGPDHTF	208	0.00291134		CVSGDARNTGQLYF	174	0.00219803		CSAGQRANTGQLYF	150	0.00190987
CASGDAAGGRQNTLYF	4550	0.061672		CAWSPGSGNTLYF	5017	0.065601		CSADQGRQDTLYF	349	0.00498394		CASSLWGTSAETLYF	494	0.00796761		CSADQSGGGAQYF	195	0.00240799		CASSLNAYEQYF	395	0.00609709		CSAGWGSYEQYF	203	0.00261245		CASSLTGVISDERLF	208	0.00291134		CASSPQGANSDHTF	174	0.00219803		CSARNQALLF	150	0.00190987
CASSQERQYEQYF	4533	0.0614416		CASSLGTNSYEQYF	5004	0.065431		CGACSGNTEVF	349	0.00498394		CSADANNERIF	489	0.00788697		CSVGQENSAETLYF	194	0.00239564		CSAGRGPNERLF	394	0.00608165		CASGATGGNQDTQYF	203	0.00261245		CGAARETYAEQF	208	0.00291134		CTRSAVGTNSDYTF	173	0.00218539		CASSGTGVNPDYTF	150	0.00190987
CASSLDFSNERLF	4531	0.0614145		CASSERVSNERLF	5000	0.0653787		CSAGGTEVF	348	0.00496966		CASGASGTKVTQYF	484	0.00780632		CASSQGLGGRGAERF	193	0.0023833		CSADPFNPGNTLYF	375	0.00578838		CSGTGGNTGVF	202	0.00259958		CASSQGPGTVYEQYF	208	0.00291134		CASSPASAETLYF	172	0.00217276		CAGGDATGGYAEQF	150	0.00190987
CASSATAPYEQYF	4530	0.0614009		CASGDQHANTEVF	4981	0.0651302		CSAVRDSNTGQLHF	347	0.00495538		CASTRDRAAEQF	483	0.0077902		CASSQGLGGRGAEQLF	193	0.0023833		CSARTGDERLF	370	0.0057112		CSADRANTGRLYF	202	0.00259958		CASSLTGQLYF	207	0.00289734		CTRSAGRNSPLYF	172	0.00217276		CASSRGGGRSYEQYF	150	0.00190987
CAWSLGTDERLF	4521	0.0612789		CASSPSANTEVF	4973	0.0650256		CAGGDASNERLF	346	0.0049411		CASSPWDWGYAEQLF	472	0.00761278		CTRSAEGLGGSQNTLYF	191	0.0023586		CASSHGLGASAETLYF	363	0.00560315		CASSIVQTNTGQLYF	202	0.00259958		CSPRQSSNERLF	207	0.00289734		CAPGGRNTGQLYF	172	0.00217276		CANGDETGGVF	149	0.00189714
CASGSANTEVF	4518	0.0612382		CASSRDWGGTNTGQLYF	4970	0.0649864		CASGQGRDTEVLF	346	0.0049411		CASSPDRTYEQYF	469	0.00756439		CASSGVGEVF	191	0.0023586		CTRSADRNSGNTLYF	358	0.00552597		CAWSLRDSTGQLYF	200	0.00257384		CSAGQGHTGQLYF	207	0.00289734		CASSQGGTGVGTQYF	171	0.00216013		CSLTGDYNNQAPPF	149	0.00189714
CASSPGGQNTLYF	4517	0.0612247		CASGGGGGRDEQYF	4957	0.0648164		CASGGRQGNEQYF	345	0.00492682		CASPPDKTYEQYF	466	0.00751601		CAGSGQGHSYEQYF	190	0.00234625		CASSQDPGANTLYF	356	0.0054951		CTRSAYRGPNSDYTF	199	0.00256097		CSTLGGLAEQF	206	0.00288335		CASSPRPGGLF	171	0.00216013		CASSQEGVGGHRSAETLYF	149	0.00189714
CASSLGGGADEQYF	4510	0.0611298		CASSQWGGRGQDTQYF	4951	0.064738		CAWSRGVDSPLYF	344	0.00491254		CASSLDESYEQYF	465	0.00749988		CASPLLGQGGEQYF	189	0.0023339		CTRSARTGNERLF	349	0.00538705		CGADARDTLYF	199	0.00256097		CASSEGRANTGQLYF	204	0.00285535		CASSPDRGGNTLYF	171	0.00216013		CTYSARNQAPLF	149	0.00189714
CASSLHRGRNSDYTF	4499	0.0609807		CASGDWGGAETLYF	4949	0.0647118		CGARGQGVF	343	0.00489826		CTSSADANNERLF	454	0.00732246		CASSLKTNLNTEVF	189	0.0023339		CARSGTTNTEVSF	348	0.00537161		CSAPGADAEQYF	198	0.00254811		CTSSTTPNSDYTF	204	0.00285535		CSADWGASTEVLF	171	0.00216013		CSADAGSYNSPLYF	148	0.00188441
CASGDKGSQNTLYF	4484	0.0607774		CASSQDGNSDYTF	4947	0.0646856		CASGDASNEGLF	342	0.00488398		CASSDAGDSPF	452	0.0072902		CSAGHNNYAGQF	188	0.00232155		CASSLPSGGEFTGQLYF	344	0.00530987		CASSPGDCGEQYF	198	0.00254811		CAGSHRDWATGQLYF	203	0.00284136		CSAPHWWQDTQYF	171	0.00216013		CASSGLGGTEKF	148	0.00188441
CAWSRGQGRSGNTLYF	4459	0.0604385		CASSQDSGANERLF	4941	0.0646072		CSAA_GNTEVF	340	0.00485541		CTCSADANNERLF	452	0.0072902		CASSPGTKNTLYF	188	0.00232155		CASGDQGRANGRLF	342	0.005279		CSADRANAGQLYF	198	0.00254811		CASSLRDWGTGAETLYF	203	0.00284136		CSAPGGRNTGQPYF	171	0.00216013		CASSPTAPNERLF	148	0.00188441
CASSLVTGGAETLYF	4455	0.0603843		CASSLDPGSQNTLYF	4936	0.0645418		CGAREGGSGNTLYF	339	0.00484113		CASSFWGSAETLYF	450	0.00725795		CASSLDRANTKVF	188	0.00232155		CSAARDSQNTLYF	340	0.00524813		CSADYNPYNSPLYF	197	0.00253524		CAWSLGTGDDTRYF	203	0.00284136		CGDARNTGQLYF	171	0.00216013		CASSGRQSQNTLYF	148	0.00188441
CASSQDQGQGNQAPLF	4453	0.0603572		CAWSGGQDTQYF	4902	0.0640972		CSAAQGSTEVF	338	0.00482685		CASSPDKTCEQYF	449	0.00724182		CSASRDPRGDTQYF	186	0.00229685		CSATGTANTEVF	338	0.00521726		CGADSGGNYAEQF	196	0.00252237		CAWSLGTGDGTQYF	203	0.00284136		CASSDAGTGDAEQLF	170	0.0021475		CASSDARDRDERYF	147	0.00187168
CASSLTGENYAEQF	4450	0.0603166		CAWSSRLGGSSYEQYF	4895	0.0640057		CSADRDSNTGQLYF	336	0.00479829		CASSLDGRGAETLYF	449	0.00724182		CASSLDRIYAGQF	186	0.00229685		CSADWGGANTGQLYF	335	0.00517095		CSGRQGNTEVF	196	0.00252237		CASSQSPGAVYEQYF	203	0.00284136		CSARGGDTQHF	170	0.0021475		CASSQDETANSDYTF	147	0.00187168
CASSQFWAAEQF	4445	0.0602488		CASSPLQGKDTQYF	4847	0.0633781		CASSPTGKGDNSPLYF	329	0.00469833		CSADGGNTEVF	448	0.00722569		CSADQPGGGTQYF	186	0.00229685		CGARVGGYEQYF	334	0.00515551		CSAEAPNQDTQYF	196	0.00252237		CSADTSSYEQYF	203	0.00284136		CASRLEGQQDTQYF	170	0.0021475		CASSQDGREVF	147	0.00187168
CASGETTNTGQLYF	4430	0.0600455		CASSQALNQDTQYF	4838	0.0632604		CGADRGGGYEQYF	328	0.00468405		CASSDGQNTLYF	445	0.0071773		CSADGDGAPAETLYF	186	0.00229685		CASSPGQGNTGQLYF	332	0.00512464		CAGSQDWEEDTQYF	196	0.00252237		CASSYHGNTEVF	203	0.00284136		CASSDTDGYEQYF	170	0.0021475		CASS_LGGTEQF	147	0.00187168
CASSQEGRGEQYF	4428	0.0600184		CASRGDQNTLYF	4829	0.0631427		CTRSAGDERLF	326	0.00465549		CSADAYNERLF	438	0.0070644		CTRSARDSNYAEQF	186	0.00229685		CSTSGGSAETLYF	318	0.00490854		CSATVDTEVF	196	0.00252237		CSAVAGGRERLF	203	0.00284136		CGADRADTEVF	170	0.0021475		CAGSHPGTEVF	146	0.00185894
CASGDASGEQNTLYF	4428	0.0600184		CASGEGPANTGQLYF	4827	0.0631166		CSAGDRIYGNTLYF	320	0.0045698		CASSLGQEVF	436	0.00703214		CASSMTGGAYEQYF	185	0.00228451		CASSDLTPNERLF	317	0.00489311		CASRGQNYTEQF	196	0.00252237		CASSEGQANTGRLYF	202	0.00282736		CAGSDAGTGDAEQF	170	0.0021475		CASSRDSYAEQF	145	0.00184621
CASGDARGGSQNTLYF	4423	0.0599506		CASSQEGRDTQYF	4810	0.0628943		CASGETGGSAEVF	319	0.00455552		CASSPDKTYEQCF	432	0.00696763		CASGQGLGGRGAEQF	185	0.00228451		CSADWGTSEQYF	316	0.00487767		CAGSGDTQAQHF	195	0.0025095		CASGAWTGQSTLYF	202	0.00282736		CANRRTGPNSDYTF	170	0.0021475		CASSQDGGEAF	145	0.00184621
CASEGQGDDTQYF	4417	0.0598693		CASSQGLNTEVF	4799	0.0627504		CSAVRDSNTEQLYF	319	0.00455552		CSADANNDRLF	430	0.00693537		CASGDRADHTF	185	0.00228451		CSAGGAGAETLYF	316	0.00487767		CASSIQGLTLYF	195	0.0025095		CAWSHWGNYAE_F	202	0.00282736		CTRSADPGHNTLYF	169	0.00213486		CASSHIWGCEQYF	145	0.00184621
CASSQDTSYNSPLYF	4404	0.0596931		CASSDPGQNTGQLYF	4793	0.062672		CSAGDGFYGNTLYF	318	0.00454124		CGASGTINERLF	424	0.0068386		CSSSRSNQDTQYF	185	0.00228451		CASSDVGYDQYF	315	0.00486224		CTRSKRDWGGETLYF	195	0.0025095		CASSQSGDNNRDTQYF	201	0.00281336		CSAAHWGQDTQYF	169	0.00213486		CAISGLGGTEQF	145	0.00184621
CASSQEWVNQDTQYF	4402	0.059666		CASSQDRGGERLF	4792	0.0626589		CSAARGNTEVF	316	0.00451268		CASSLDKSYEQCF	422	0.00680634		CSAGQYNPPLYF	184	0.00227216		CASGDVSGGYEQYF	311	0.00480049		CGAGRDISYNSPLYF	194	0.00249663		CASSRDADWAYAEQF	201	0.00281336		CASSDARNTGQLYF	169	0.00213486		CASSQQGAYSSPLYF	144	0.00183348
CASGDRTGENSDYTF	4402	0.059666		CSADPGSSYEQYF	4784	0.0625543		CTRSAAQGNTEVF	313	0.00446984		CSSSQWTPYAEQF	421	0.00679021		CASSLVGTDTEVLF	184	0.00227216		CSADPLNSGNTLYF	308	0.00475419		CASSLRGDTGVF	194	0.00249663		CASSQSGDNSQDTQYF	201	0.00281336		CASSQDTIDTGQLYF	169	0.00213486		CASGDATGGYAEQLF	144	0.00183348
CASSPGQGAYEQYF	4401	0.0596524		CASGDALGVNYAEQF	4776	0.0624497		CSADQGRRNTLYF	313	0.00446984		CASSDAGNSPLYF	420	0.00677408		CSAEGLGGSQSTLYF	184	0.00227216		CASSQETSNTEVF	305	0.00470788		CTRSASGGYNQAQHF	194	0.00249663		CGSRGLFSNERLF	200	0.00279937		CASSLPQTEQF	169	0.00213486		CSLTGRTSAETLYF	143	0.00182075
CASSLSHRGNTEVF	4383	0.0594084		CAWGGTGTYEQYF	4771	0.0623843		CSSRDRDSYEQHF	311	0.00444128		CRADANNERLF	420	0.00677408		CTRSAARGGYF	184	0.00227216		CASSQGRGQDTQYF	304	0.00469244		CASRTNNERLF	194	0.00249663		CSADASSYEQHF	200	0.00279937		CRTGGQGTQYF	169	0.00213486		CRLTGVNQAPLF	142	0.00180801
CASSDGEARGNQAPLF	4377	0.0593271		CASSPGAGVNTGQLYF	4769	0.0623582		CGADQGRQNTLYF	310	0.004427		CAGSPWDWGYAEQF	419	0.00675795		CSADLGGSEQYF	184	0.00227216		CRRDINSDYAF	303	0.00467701		CGADRANTGQLYF	194	0.00249663		CASSQDADWAYAEQLF	199	0.00278537		CSADWGGAAVTLYF	168	0.00212223		CSAGVNTVYF	142	0.00180801
CASSLRTENTGQLYF	4374	0.0592864		CAWSRGINERLF	4754	0.062162		CSADRGSYNSPLYF	310	0.004427		CASSAPPLF	406	0.00654828		CSAEGRDTQYF	184	0.00227216		CARSLGGSAETLYF	302	0.00466157		CTYSATGDEQYF	194	0.00249663		CASGAPGGRGEQYF	199	0.00278537		CSAGWGASTEVF	168	0.00212223		CASSWDGYAEQF	142	0.00180801
CASGGKPSAETLYF	4365	0.0591644		CASSQGQHPYAEQF	4722	0.0617436		CAWSWGISNGRLF	309	0.00441271		CASSPDKTHEQYF	398	0.00641925		CASGEGTGQGTQYF	184	0.00227216		CGSSDVGYEQYF	301	0.00464614		CASSLPGRDSQAQHF	193	0.00248376		CASGQSGDNNQDTQYF	199	0.00278537		CTAPHWGQDTQYF	168	0.00212223		CAGSQDTGGYAEQF	142	0.00180801
CASRDWGSSYEQYF	4338	0.0587985		CASAGTNTEVF	4704	0.0615082		CAGGERQGNEQYF	309	0.00441271		CSAEANNERLF	393	0.00633861		CSAGQNTGQLYF	183	0.00225981		CSADPFNSGDTLYF	290	0.00447634		CSGGTKNALYF	193	0.00248376		CASSALQGWDTEVF	198	0.00277137		CASSQGGLQDTPYF	168	0.00212223		CASGDATGGYAERF	142	0.00180801
CASSPQGF	4333	0.0587307		CASGDVGQNNQAPLF	4698	0.0614298		CASGQGRDTGVF	308	0.00439843		CASSLDKSYEQHF	393	0.00633861		CASGGGQGNYAGQF	183	0.00225981		CASGETGNSGNTLYF	287	0.00443004		CSAGVPGVF	193	0.00248376		CASSLRD_GTSAETLYF	198	0.00277137		CASSDTEGSLYF	168	0.00212223		CASGSGQEGTEVF	141	0.00179528
CASGDREYAEQF	4328	0.0586629		CASSLGVTEVF	4697	0.0614167		CASGERQGNGQYF	304	0.00434131		CASSLDRSYEQYF	388	0.00625796		CASSLTTNSNTEVF	183	0.00225981		CASGDSSSGNTLYF	282	0.00435286		CSSTGAGGGQNTLYF	193	0.00248376		CSVNSYNSPLYF	198	0.00277137		CASGPTTNTGQPYF	167	0.0021096		CASSQQGAYNPPLYF	141	0.00179528
CASGDQNNQAPLF	4323	0.0585952		CAWSLWGSNSDYTF	4681	0.0612075		CAGSDARAEYEQYF	301	0.00429847		CASSLDKSCEQYF	385	0.00620958		CSAAGVGGNTLYF	183	0.00225981		CSARTGNERLLF	279	0.00430655		CSDRQGNAEVF	193	0.00248376		CAWSRWGNYAEQF	197	0.00275738		CASGDARNTGRLYF	167	0.0021096		CASSGLAGTEQF	141	0.00179528
CAWRQKYEQYF	4321	0.0585681		CASSGGTGTEVF	4656	0.0608806		CGADRDSYNSPLYF	296	0.00422707		CASSLNKSYEQYF	383	0.00617732		CSARGTGVF	183	0.00225981		CTRRQGTYEQYF	277	0.00427568		CSSTGTGGGQSTLYF	193	0.00248376		CASGAWAGQNTLYF	197	0.00275738		CASSQGGTGVDAQYF	167	0.0021096		CSADESSYNSPLYF	141	0.00179528
CASGERQSSYEQYF	4313	0.0584596		CASSLRGGNQAPLF	4649	0.0607891		CTGSARDWGF	294	0.00419851		CASSGQNTEVF	371	0.00598377		CSINSGDTLYF	182	0.00224746		CASSAVGYEQYF	276	0.00426024		CASRPLGDPNERLF	192	0.00247089		CGADFGRNTGQLYF	196	0.00274338		CSSGGGANTEVF	167	0.0021096		CASGDETEGVF	141	0.00179528
CASGETASAETLYF	4290	0.0581479		CASSPLTRAYTEVF	4635	0.060606		CASSPADRVTEVF	293	0.00418422		CASRPWDWGYAEQF	370	0.00596764		CASSDSENTEVF	181	0.00223511		CGARDAGSSYEQYF	273	0.00421394		CSAVSQDTLYF	192	0.00247089		CAGGAWTGQNTLYF	196	0.00274338		CSLEGQQDTQYF	166	0.00209697		CASGDTNSDNTF	140	0.00178255
CASSHRDREPLYF	4283	0.058053		CASGDKAYEQYF	4633	0.0605799		CASSETGGSTEVF	293	0.00418422		CSAVGQGAGDTLYF	366	0.00590313		CASSYWGGPTEVF	181	0.00223511		CSAPGTDTNTEVF	272	0.0041985		CSAGDNYE_YF	192	0.00247089		CASSHRDWATGRLYF	195	0.00272938		CASSQGGTGADTQYF	165	0.00208434		CASGDETGEVF	140	0.00178255
CASGDARGGDTQYF	4281	0.0580259		CAWSLRGDNQAQHF	4621	0.060423		CASGDTSNERLF	292	0.00416994		CASNDAGDSPLYF	366	0.00590313		CASSFRANSDYTF	180	0.00222276		CTSSAPGTDANTEVF	271	0.00418307		CAWSRAGANSGNTPYF	192	0.00247089		CAWGLGTGDDTQYF	195	0.00272938		CTRSADKNTLYF	165	0.00208434		CTGSAGQGANTGQLYF	140	0.00178255
CASGANYAEQF	4278	0.0579852		CASGDADWGKNTLYF	4610	0.0602791		CASSDKNTLYF	289	0.0041271		CASSVAGDSPLYF	365	0.005887		CSADRWNSGNTLYF	180	0.00222276		CSATSGTNYAEQF	271	0.00418307		CASGTAGGNQDTQYF	192	0.00247089		CASSLRDREDERYF	194	0.00271539		CTRSAGANTEVF	165	0.00208434		CASSQGGGRSYERYF	139	0.00176982
CASSQAAGNQDTQYF	4261	0.0577548		CASSQDAPTGGEQYF	4600	0.0601484		CSADQGRQNTLHF	285	0.00406998		CSADGRSTEVF	359	0.00579023		CASGGGTGQDTQYF	179	0.00221041		CAWRRHGLSQNTLYF	269	0.00415219		CASGQDRGDQDTQYF	191	0.00245802		CASSQPGDNNQDTQYF	194	0.00271539		CSETVSNERLVF	165	0.00208434		CASS_QDTQYF	139	0.00176982
CASSQDPGNTEVF	4250	0.0576057		CAWSLGGSAETLYF	4595	0.060083		CAGSQDGGDTEVF	283	0.00404142		CASEQGSYAEQF	357	0.00575797		CAWGLTGGVYAEQF	179	0.00221041		CASSDVGYELYF	269	0.00415219		CSATVNTEVSF	191	0.00245802		CASSRSGDNNQDTQYF	193	0.00270139		CASSLGRGDTRYF	164	0.0020717		CSARLEGPSAETLYF	139	0.00176982
CASSDWGGKNTLYF	4246	0.0575515		CASSQERDRDTQYF	4590	0.0600176		CSADRDGYNSPLYF	277	0.00395573		CASDDSRAETLYF	357	0.00575797		CASSLDRANTEVVF	177	0.00218572		CGADPFNSGNTLYF	267	0.00412132		CASSQDPAGGHAEQSF	191	0.00245802		CAWSLGTERDEQYF	193	0.00270139		CSAGRNSPPYF	164	0.0020717		CASSQEGTANSDYTF	139	0.00176982
CASSQEGVSNERLF	4234	0.0573888		CASTQATEVF	4570	0.0597561		CASGERQGDEQYF	275	0.00392717		CSADRAGGAETPYF	356	0.00574184		CSAGQYNSPPYF	176	0.00217337		CSAGGTNTRQLYF	264	0.00407502		CASSPDSSYGQYF	190	0.00244515		CASSQSPGTVYERYF	193	0.00270139		CTRSADREQYF	164	0.0020717		CSARN_APLF	138	0.00175708
CASRGTYQDTQYF	4234	0.0573888		CASGEGTSTEVF	4564	0.0596776		CTRSADLGRQNTLYF	275	0.00392717		CASGTGVYAEQF	351	0.0056612		CASSLVGTDTEAF	175	0.00216102		CSAAPNTEVLF	262	0.00404414		CSPYREGEVSF	190	0.00244515		CASSMGRYEQYF	192	0.00268739		CASSLRGRGTEVSF	163	0.00205907		CVSSHIWGYEQYF	138	0.00175708
CAWSRDREDERLF	4223	0.0572397		CASSDGGTEVF	4524	0.0591546		CAWSLWGAF	274	0.00391289		CTYSAPGTDGTEVF	351	0.0056612		CASSKTGRYAEQF	175	0.00216102		CSARTGNEK_SF	259	0.00399784		CTRSARYNSPLYF	190	0.00244515		CTIEIQSSKLTDSAVYFSASSQSRDHYAEQF	192	0.00268739		CASSDMGGYEQYF	163	0.00205907		CASSQGTGGYAEQF	137	0.00174435
CASSAWGVSYEQYF	4217	0.0571584		CASSQGLGYEQYF	4519	0.0590892		CTRSAEGEKSQNTLYF	272	0.00388433		CASSLGGTEVF	349	0.00562894		CTCMALSNERLF	175	0.00216102		CASGDGGLGGYERYF	256	0.00395153		CGATGDSAETLYF	190	0.00244515		CASSTTPNSNYTF	190	0.0026594		CAGSLSWGVQNTLYF	163	0.00205907		CASSGLGGTEQVF	136	0.00173162
CAWSSSYEQYF	4216	0.0571449		CASSPTTGNQDTQYF	4515	0.0590369		CTRSATKDTQYF	271	0.00387005		CGAGGGGQDTQYF	347	0.00559668		CSARDSSYAEQF	174	0.00214867		CSAGANTEVF	253	0.00390522		CSAGRGISYNSPLYF	189	0.00243228		CSADQGAGTLYF	190	0.0026594		CSADRGQYF	163	0.00205907		CASGDTNSGYTF	136	0.00173162
CASSQDWGGYEQYF	4210	0.0570635		CSADRGTEVF	4512	0.0589977		CSAAQGNAEVF	271	0.00387005		CASSPDKTYERYF	346	0.00558055		CASSPRANSDYTF	174	0.00214867		CASSVVGYEQYF	252	0.00388979		CSETANTEVF	189	0.00243228		CTCRLGGETLYF	189	0.0026454		CTRSADSSGNTLYF	162	0.00204644		CRGTGRTSAETLYF	136	0.00173162
CASSQDPQGAHGTEVF	4210	0.0570635		CASGGTSNTGQLYF	4512	0.0589977		CASSPTWQYF	268	0.00382721		CSADGRNTGVF	340	0.00548378		CSDDRTGLSEQF	174	0.00214867		CASSDLGYEQYF	251	0.00387435		CAWRRTSNNQAQHF	189	0.00243228		CANSWDRVYEQYF	189	0.0026454		CASGLLGQGYAEQF	162	0.00204644		CSASRDQNTLYF	136	0.00173162
CASSDAGGSSYEQYF	4210	0.0570635		CAWSSRDRSYSDYTF	4505	0.0589062		CASGDASSERLF	267	0.00381293		CTSSLDKSYEQYF	337	0.0054354		CASGDARGPSAETLYF	173	0.00213632		CASGPGLEASQNTLYF	246	0.00379717		CASSQDPGGSPQYF	188	0.00241941		CTYSASRGQDTQYF	189	0.0026454		CSADWGASTEAF	162	0.00204644		CASSQDTGGYAGQF	135	0.00171889
CASGDAGGNYAEQF	4205	0.0569958		CASSQGNYAEQF	4493	0.0587493		CTRSARDWGDEQYF	266	0.00379865		CGAGTGGSDYTF	336	0.00541927		CASSPLGQGGEQYF	173	0.00213632		CASSDVG_EQYF	246	0.00379717		CSADRANIGQLYF	188	0.00241941		CGAVGDEQYF	188	0.0026314		CSADRADTGVF	161	0.00203381		CASSDARDRDEQCF	135	0.00171889
CAWSLWRNSDYTF	4205	0.0569958		CSADQYNNQAPLF	4486	0.0586577		CSADQGRQNTLCF	265	0.00378437		CASSPWGWGYAEQF	332	0.00535475		CTRSLRGWDTQYF	172	0.00212397		CASGDQGRANERSF	243	0.00375087		CSAGYNSYNSPLYF	188	0.00241941		CSASRGQDTQHF	188	0.0026314		CSADRADAEVF	161	0.00203381		CASSDARDRGEQYF	135	0.00171889
CASGDAWGDYAEQF	4200	0.056928		CSATGGSERLF	4483	0.0586185		CSAVRDSNTGQLCF	264	0.00377009		CSADANNEKLF	331	0.00533862		CASSHAGTGDGERLF	172	0.00212397		CASGLQGAAGNTLYF	241	0.00372		CSAASQNTLYF	188	0.00241941		CASSTRSRNTLYF	188	0.0026314		CSAGPGHNTLYF	161	0.00203381		CSADECSYNSPLYF	134	0.00170615
CAWRPQGNQDTQYF	4192	0.0568196		CASGDRQGGDTQYF	4458	0.0582916		CAGSDARTEYEQYF	263	0.00375581		CASSPGGNSDCTF	327	0.00527411		CSADRLSYEQYF	172	0.00212397		CSAGWGGANTWQLYF	241	0.00372		CASSPSGDYEQYF	188	0.00241941		CGDRFSNERLF	188	0.0026314		CASSDMDGYGQYF	160	0.00202117		CANSHIWGYEQYF	134	0.00170615
CASGDAGQAYEQYF	4185	0.0567247		CASGVSTGVSDTQYF	4451	0.0582001		CVSSQVSQNNQAPLF	259	0.00369868		CASSRLRDTQYF	326	0.00525798		CASSDWDSSYEQYF	172	0.00212397		CSARTGNGRLF	240	0.00370456		CGADYNSYNSPLYF	187	0.00240654		CSANNYEQYF	187	0.00261741		CSADRANTEVF	160	0.00202117		CASSLWYYEQSF	134	0.00170615
CAWSLGGAGNTLYF	4182	0.056684		CASGEGTDTEVF	4432	0.0579516		CSAVRDNNTGQLYF	258	0.0036844		CTRSADGRNTEVF	322	0.00519346		CSADGNTEVF	171	0.00211162		CAGSDRPNSDYTF	239	0.00368912		CASSPGQYEQYF	187	0.00240654		CANSHPGQGSNERLF	187	0.00261741		CSAVAGGAGAETLYF	160	0.00202117		CSAGVNQAPLF	133	0.00169342
CASSGTGQAEQF	4169	0.0565078		CASSLAGLGDEQYF	4429	0.0579124		CASSQTGNTGQLYF	258	0.0036844		CARSDAGDSPLYF	310	0.00499992		CSGGQGNSAETLYF	171	0.00211162		CSARTGNERLSF	236	0.00364282		CSGGTKSTLYF	187	0.00240654		CSDRFSNGRLF	187	0.00261741		CAGSDDWGGEEQYF	160	0.00202117		CVSSQQGAYNSPLYF	133	0.00169342
CASSHLGGFQNTLYF	4168	0.0564942		CASRLGGKNTLYF	4405	0.0575986		CASGERQGNERYF	255	0.00364156		CASSSLGNYAEQF	305	0.00491927		CSVG_GNSAETLYF	170	0.00209928		CSADPFNSGNTLCF	235	0.00362738		CSATGDE_YF	186	0.00239367		CSQSRDHYAEQF	186	0.00260341		CSAQHWGQDTQYF	160	0.00202117		CSAFRGQNTLYF	133	0.00169342
CASSQDQGYSGNTLYF	4167	0.0564807		CAWSLGDSAETLYF	4401	0.0575463		CASSQDPGETRSSYEQYF	252	0.00359872		CASSDAQNTEAF	304	0.00490315		CASSDARGPSAGTLYF	170	0.00209928		CASSEVGYEQYF	234	0.00361195		CSADRGSYEQYF	186	0.00239367		CASSPDWVSYEQYF	184	0.00257542		CASSDDWGGGEQYF	159	0.00200854		CSASGGQNTLYF	133	0.00169342
CASSPGPGTGYEQYF	4167	0.0564807		CASSLSVGFSNERLF	4400	0.0575332		CSAGDQDTQYF	252	0.00359872		CASSPWDRGYAEQF	304	0.00490315		CGADTYEQYF	170	0.00209928		CASGPSSGNTLYF	234	0.00361195		CSGPGRANTEVF	186	0.00239367		CSADASSYERYF	184	0.00257542		CAGSPDRDGNTLYF	159	0.00200854		CASGGRQSQNTLHF	132	0.00168069
CASSLVGTVYAEQF	4160	0.0563858		CASSGGLAEQYF	4393	0.0574417		CSATKGTQYF	251	0.00358444		CASSPWDWGYAEQSF	303	0.00488702		CSARDSNHAEQF	170	0.00209928		CSSGTGGARYA_QF	231	0.00356564		CAGRPLGGYAEQF	185	0.00238081		CASSLRDWGTSAGTLYF	184	0.00257542		CAGSPYWGNYAEQF	159	0.00200854		CASGHGASAETLYF	132	0.00168069
CASSSGGGVSNERLF	4153	0.0562909		CASSQEGLGGEQYF	4390	0.0574025		CTCSAVRDSNTGQLYF	244	0.00348447		CGAWTGGSAETLYF	301	0.00485476		CSVGQGPSAETLYF	169	0.00208693		CGARTGNERLF	230	0.0035502		CSDRQRNTEVF	185	0.00238081		CASSFTGGANERLF	182	0.00254742		CSAGDWGGTQYF	159	0.00200854		CASSQQEAYNSPLYF	132	0.00168069
CASGDVGRGNERLF	4148	0.0562232		CASSFPSSAETLYF	4388	0.0573763		CSVDQGRQNTLYF	243	0.00347019		CASRLSYEQYF	300	0.00483863		CASSGRDQDTQYF	169	0.00208693		CGARRLGGRGSSYEQYF	229	0.00353477		CASSIAITYEQYF	184	0.00236794		CASGPGTGNTEVF	182	0.00254742		CSSRGGTNTEVF	159	0.00200854		CASSFPDRGPTGQPYF	131	0.00166796
CASSLSSGNTLYF	4136	0.0560605		CAWSLGTGGSAETLYF	4385	0.0573371		CGAAQGNTEVF	242	0.00345591		CASSPDKTYEQHF	299	0.0048225		CSLEIQSSEAGDSALYLSASSTTTNSDYTF	169	0.00208693		CASRDRVGSDCTF	228	0.00351933		CSGPGQADTEVF	183	0.00235507		CVWSLGTGRDEQYF	182	0.00254742		CASGADRVSYAEQF	158	0.00199591		CSEQNQDTQYF	131	0.00166796
CASGDEGGQDTQYF	4131	0.0559927		CSADGTAQDTQYF	4382	0.0572979		CASGETGGSTGVF	238	0.00339879		CASSLDKSHEQYF	297	0.00479024		CKGQNTLYF	169	0.00208693		CTRSAEGGGFGNTLYF	227	0.0035039		CASSQDQDSNERLF	183	0.00235507		CASSQDWTGIDTRYF	182	0.00254742		CASSMEGTEVF	158	0.00199591		CASGHRASAEALYF	131	0.00166796
CAWSLGGLNYAEQF	4125	0.0559114		CASGDAGGDNQAPLF	4381	0.0572848		CSAAQGNTGVF	236	0.00337023		CASSPRDWGYAEQF	295	0.00475799		CSAVEDNQAPLF	168	0.00207458		CSAGQNNSPPYF	227	0.0035039		CGADPVNTLYF	183	0.00235507		CSSRGLFSNERLSF	182	0.00254742		CAWSLGAFSDERLF	158	0.00199591		CASSQEGVGGRRSVETLYF	130	0.00165522
CAWSLDNERLF	4108	0.055681		CASSDQNTEVF	4380	0.0572717		CSPGQSNTEAF	236	0.00337023		CASSNAGDSPLYF	294	0.00474186		CSAGTGVNRAPLF	168	0.00207458		CSALGVQGTQYF	224	0.00345759		CASSIVQQDTQYF	183	0.00235507		CAGSPGTGNTEVF	181	0.00253343		CTRSADWGGAAETLYF	158	0.00199591		CASSHPGTEAF	130	0.00165522
CASGDSAYEQYF	4106	0.0556539		CASSLRGNYAEQF	4374	0.0571933		CTSSDTGGEQYF	234	0.00334167		CASSDADQAPLF	291	0.00469347		CTRSAEGGGEQYF	168	0.00207458		CSADRNSGNTPYF	222	0.00342672		CASSGGTQAQHF	183	0.00235507		CSADPAADTEVF	180	0.00251943		CSAVWGTEVLF	158	0.00199591		CAGGGPQGSNTEVF	130	0.00165522
CASAGGSDYTF	4100	0.0555726		CASGEPGLGGREQYF	4360	0.0570102		CSSYRGGAERF	233	0.00332739		CASRDAGDSPLYF	287	0.00462896		CSGDKSQNTLYF	167	0.00206223		CAWSLGGSAEALYF	221	0.00341128		CSAGPEGETEVF	182	0.0023422		CVSSGINQDTQYF	179	0.00250543		CTRSAGDWGDTQYF	157	0.00198328		CASGGATGGYAEQF	129	0.00164249
CASSDDRGPPERLF	4094	0.0554912		CASSLQVSNERLF	4356	0.0569579		CSADRDSHNSPLYF	232	0.00331311		CGARAVGNSDYTF	284	0.00458057		CASSDRDQDAQYF	167	0.00206223		CSAPGTDASTEVF	221	0.00341128		CASSQDWEEDTRYF	181	0.00232933		CAWSLGTGRDDQYF	179	0.00250543		CSAGAGNTEVF	157	0.00198328		CASSPGTGDYSNQAPLF	129	0.00164249
CASSQDLDWGGAGAETLYF	4088	0.0554099		CASRAHNERLF	4353	0.0569187		CSAAKDTQYF	231	0.00329883		CASSDAGDSPLDF	283	0.00456444		CSVNSGNTLYF	167	0.00206223		CSAAGTKFSNERLLF	220	0.00339585		CASSPDSPYEQYF	181	0.00232933		CSAERCNSPLYF	179	0.00250543		CASSLRGRDTEVF	156	0.00197064		CASGDTNSDCTF	128	0.00162976
CASRQGTGKNSDYTF	4077	0.0552608		CAWTGGPSSYEQYF	4352	0.0569056		CASSLRNTEVF	230	0.00328454		CSADANNER_F	277	0.00446767		CASSLDRANIEVF	166	0.00204988		CSAPGGASQNTLYF	219	0.00338041		CASSRDPAGGHAEQF	181	0.00232933		CASSGGQGTNSPLYF	178	0.00249144		CGAGTGNTEVF	156	0.00197064		CSAG_GANTGQLYF	128	0.00162976
CASGDAAGGQNTLYF	4059	0.0550168		CASSVGQGEDTQYF	4340	0.0567487		CSADRDSCNSPLYF	228	0.00325598		CASSCGRESN_AEQF	276	0.00445154		CASSLKTNSNTVVF	166	0.00204988		CASSLGGEEDTQYF	217	0.00334954		CLAGGYAGQF	180	0.00231646		CASSTGSQNTLYF	178	0.00249144		CSADRGASTEVF	156	0.00197064		CVSGGRQSQNTLYF	128	0.00162976
CSADRTGDNERLF	4051	0.0549084		CASSLDRLASQNTLYF	4331	0.056631		CSAGSQDTQYF	228	0.00325598		CASSAGTEVLF	273	0.00440315		CTRSAPGGYEQYF	166	0.00204988		CSADPFSSGNTLYF	211	0.00325693		CGASGGYNQAQHF	180	0.00231646		CASSQSRDHYAEPF	178	0.00249144		CASSGDLYERYF	156	0.00197064		CASSYRGEDTQYF	128	0.00162976
CASSDRDNYAEQF	4047	0.0548542		CAWSRQNTEVF	4331	0.056631		CSADLGRQNTSYF	228	0.00325598		CASSFWDWGYAEQF	270	0.00435477		CTCKPGLGDAEQF	166	0.00204988		CASGDARTGNTLYF	211	0.00325693		CSAGGDSPPYF	180	0.00231646		CSANSYNSPLHF	178	0.00249144		CSADPGRNTLYF	156	0.00197064		CSGTGRTSAETVYF	127	0.00161703
CASGDATGRGTEVF	4044	0.0548135		CSADEAGANTEVF	4320	0.0564872		CSAAGGDTGVF	227	0.0032417		CSADANTERLF	269	0.00433864		CAGSQDGGVQDTQYF	166	0.00204988		CASGDPGQGAEVLF	208	0.00321062		CSAEGANRDTQYF	179	0.00230359		CASSHPGQGPNERLF	178	0.00249144		CASRRTRPNSDYTF	156	0.00197064		CSADEGSYNSPLF	127	0.00161703
CASSRTEDTQYF	4037	0.0547186		CASGDAQGVAEQF	4315	0.0564218		CASGDASNERLLF	226	0.00322742		CSADRLGVSQNTLCF	268	0.00432251		CSAGHNDYAEQF	166	0.00204988		CASADKNSNERLSF	208	0.00321062		CGADPEGETEVF	179	0.00230359		CASRQGANERLF	178	0.00249144		CAGSGDLYEQYF	155	0.00195801		CSARLGGPSAEMLYF	127	0.00161703
CATTGGSYEQYF	4026	0.0545695		CASSDGGAGNSPLYF	4298	0.0561995		CSADPTDNSPPYF	225	0.00321314		CSADANHERLF	267	0.00430638		CNVGQGNSAETLYF	166	0.00204988		CASSGRPNSDYTF	208	0.00321062		CSADARDTLHF	179	0.00230359		CSASKGQDTQYF	178	0.00249144		CTSGDARNTGQLYF	155	0.00195801		CASSQDGTANSDYIF	127	0.00161703
CASSQGLGKNTLYF	4019	0.0544747		CASGEGTGGVYAEQF	4294	0.0561472		CSVVRDSNTGQLYF	222	0.0031703		CASGDAGGVN_DTQYF	265	0.00427412		CSVGQGNSAEMLYF	165	0.00203753		CASGDRPNSDYTF	206	0.00317975		CSGHTS_NTLYF	178	0.00229072		CANMSQGRTLYCTCSADNYEQYF	177	0.00247744		CASSETVSNERLF	155	0.00195801		CASSLWYDEQYF	126	0.00160429
CASGDGGRGYAEQF	4019	0.0544747		CASSDELGGLGTQYF	4285	0.0560295		CGAGTGHEQYF	220	0.00314174		CASSPWDWGCAEQF	265	0.00427412		CSSTAAFSNEGLF	165	0.00203753		CSALGAQDTQYF	205	0.00316431		CSAYGGPNSDYTF	177	0.00227785		CGGGQTNTEVF	177	0.00247744		CASSDGFTSYF	155	0.00195801		CSDARDRDEQYF	126	0.00160429
CASSQDHRANTEVF	4011	0.0543662		CASSDEEGRSDYTF	4277	0.0559249		CTSGETGGSTEVF	217	0.0030989		CASFLDKSYEQYF	263	0.00424187		CSADLGGNGQYF	164	0.00202518		CSATGPNEGLF	205	0.00316431		CTSSAPGADAEQF	177	0.00227785		CAWSLGTGDDTQHF	176	0.00246344		CSETVSNE_LF	155	0.00195801		CASSQDGGEVLF	126	0.00160429
CASSPGTGGYEQYF	4008	0.0543256		CASSQQGDAEQF	4275	0.0558988		CSPGQSNTEVLF	216	0.00308462		CASSLWDWGYAEQF	259	0.00417735		CSADEGNYAGQF	163	0.00201283		CASGVATGGDYAE_F	205	0.00316431		CGSTGTGGGQNTLYF	177	0.00227785		CSTDNYEQYF	176	0.00246344		CARSRGARDTQYF	155	0.00195801		CSARLGGTSAETLYF	125	0.00159156
CASGTGDNYAEQF	4006	0.0542985		CAWRQGNTLYF	4255	0.0556372		CSADRDSYNSPLHF	214	0.00305605		CASSLGHFSNERLF	256	0.00412896		CSAGGLGGSQNTLYF	163	0.00201283		CASSDVGYEQSF	204	0.00314888		CGGPGQANTEVF	177	0.00227785		CSDRFSNERSF	175	0.00244945		CRTGGQDTRYF	155	0.00195801		CASSRTINQGTQYF	125	0.00159156
CASSQGHQDTQYF	4001	0.0542307		CSEGTNTEVF	4249	0.0555588		CASRQADTGQLYF	214	0.00305605		CSADGRNAEVF	253	0.00408058		CSAVGGQDTQYF	163	0.00201283		CASGERTTNSDYTF	204	0.00314888		CSPTGTGGGQNTLYF	177	0.00227785		CSAGQGAETLYF	175	0.00244945		CASRTLNQDAQYF	154	0.00194538		CAGSGTGVNSDYTF	125	0.00159156
CASSRDRNNQAPLF	3999	0.0542036		CASSYGDANTEVF	4244	0.0554934		CSAGASQDAQYF	213	0.00304177		CSADAINERLF	253	0.00408058		CSADGANAEVF	162	0.00200049		CSALGVQDAQYF	203	0.00313344		CGSSPGDWGEQYF	177	0.00227785		CSAARETCAEQF	175	0.00244945		CAGSQDTINTGQLYF	154	0.00194538		CASSGLGGT_QF	124	0.00157883
CASGDWGTGQLYF	3997	0.0541765		CASWGRGVNNQAPLF	4232	0.0553365		CASGHTEQDTQYF	210	0.00299893		CASSPNWGAYEQYF	252	0.00406445		CTRSAEGQDTQYF	162	0.00200049		CASRTANSGYTF	201	0.00310257		CASGQDLANTEVF	176	0.00226498		CSGDKEVF	175	0.00244945		CSETVSIERLF	154	0.00194538		CASGDGGTENTEVF	124	0.00157883
CASGGTGVSQNTLYF	3977	0.0539054		CASSRGTASETLYF	4222	0.0552057		CSADWGDTGQPYF	209	0.00298465		CASSPWDWGYAE_F	251	0.00404832		CSAGGGGEQYF	162	0.00200049		CASAQGDSGNTLYF	199	0.0030717		CSGPGQASTEVF	176	0.00226498		CASGALGGRGERYF	175	0.00244945		CSAPGGTNTGQLYF	154	0.00194538		CASGNETGGVF	124	0.00157883
CAWSGGGALEQYF	3966	0.0537563		CASSPQNYAEQF	4220	0.0551796		CSATKDAQYF	208	0.00297037		CANSPDKTYEQYF	250	0.00403219		CSVGQGNNAETLYF	162	0.00200049		CASSDVGYEQF	198	0.00305626		CSDRQGNTEVLF	176	0.00226498		CSSRGQFSNERLF	175	0.00244945		CASSPQGANSDCTF	154	0.00194538		CASSPTASNERLSF	124	0.00157883
CASSDARQNTLYF	3964	0.0537292		CAKEGASAETLYF	4220	0.0551796		CASGERQGSEQYF	205	0.00292753		CGARNSGNTLYF	250	0.00403219		CSARDSNYAEQLF	162	0.00200049		CSAATGGFPNERLF	197	0.00304083		CASSIPGSNTEVF	176	0.00226498		CTSSLRDWGTSAETLYF	175	0.00244945		CASRDWTNTGQLYF	153	0.00193275		CSADEGSYNSPF	124	0.00157883
CASSHDRGRSSYEQYF	3961	0.0536885		CASSDALGTEVF	4208	0.0550227		CSADGLGGYAE_F	205	0.00292753		CTSSPDKTYEQYF	247	0.00398381		CKPGLGDAGQF	161	0.00198814		CTRSAGQNNSPLYF	197	0.00304083		CSARYSSPLYF	176	0.00226498		CASSHRDWATGQLHF	175	0.00244945		CSADWGQDTQYF	153	0.00193275		CASSRAINQDTQYF	123	0.0015661
CASGHREGSDYTF	3948	0.0535123		CASGDRPSNTEVF	4180	0.0546566		CSADLGRRNTLYF	204	0.00291325		CASGGGYEQYF	244	0.00393542		CSAVDGGLDTQYF	161	0.00198814		CSADPFNSRNTLYF	195	0.00300996		CASSLRGDTEVSF	175	0.00225211		CTRSPRQFSNERLF	175	0.00244945		CSSRGGANAEVF	152	0.00192012		CASGRTINQDTQYF	123	0.0015661
CASSQDTRQGDERLF	3947	0.0534988		CASSHLYWGNYAEQF	4178	0.0546304		CVSGDASNERLF	204	0.00291325		CSADAHNERLF	244	0.00393542		CSAGQSGGGTQYF	161	0.00198814		CASSDRPSSDYTF	194	0.00299452		CLAGGYAEQSF	175	0.00225211		CRPGQNHAEQF	174	0.00243545		CSAPHWGQDTQYFGPGTRLL_NREPGAGTEVLF	152	0.00192012		CASSLWYYAQYF	123	0.0015661
CASSSTGGGSEQF	3937	0.0533632		CASSHLFNNSYNSPLYF	4169	0.0545127		CSADWGDAGQLYF	204	0.00291325		CASSRDWGVEQYF	243	0.00391929		CAGSVTGEEVF	161	0.00198814		CSALGVRDTQYF	193	0.00297908		CASSINAEQF	175	0.00225211		CASSQARSQNTSYF	174	0.00243545		CASSLGRGDSGNTLYF	152	0.00192012		CASSQDGGGVF	123	0.0015661
CASRINTEVF	3930	0.0532683		CASSPRNYAEQF	4165	0.0544604		CTRSAGGLTEVF	203	0.00289897		CASGPWDWGYAEQF	243	0.00391929		CRASGGVTEVF	160	0.00197579		CNGTGF	193	0.00297908		CASRPLGGYAGQF	175	0.00225211		CSADSYEQYF	174	0.00243545		CSAGRQGTGQLYF	152	0.00192012		CAGRGISYEQYF	123	0.0015661
CAWRRVTLYF	3918	0.0531057		CASSPSQNTLYF	4162	0.0544212		CTRSPGQSNTEVF	203	0.00289897		CASGERGSGNTLYF	243	0.00391929		CASSPRGRQNTLHF	160	0.00197579		CAWGLGGSAETLYF	192	0.00296365		CAGSLPGRDNQAQHF	175	0.00225211		CSADQCNAETLYF	174	0.00243545		CSADWSASTEVF	151	0.00190748		CASSRTINQDTRYF	122	0.00155336
CASTRDRNTEVF	3918	0.0531057		CASSQEDRGRNTQYF	4159	0.054382		CSAEGGGPSAETPYF	202	0.00288469		CANSLDKSYEQYF	242	0.00390316		CSAVGDNQAPPF	160	0.00197579		CTRSAPGTDANTEVF	189	0.00291734		CSAEALSQDTQYF	175	0.00225211		CSVAGTGVAEQF	172	0.00240746		CASSPGRDGNTLYF	151	0.00190748		CASSRTISQDTQYF	122	0.00155336
CASGRQGDAEQF	3918	0.0531057		CSAGTGNQAQHF	4157	0.0543558		CASSQDQQETGQLYF	202	0.00288469		CALPSGTGGDRDTQYF	240	0.0038709		CSAGRGQNTLYF	159	0.00196344		CSAPGGTSQNTSYF	188	0.00290191		CAGSQEQGNSYEQYF	175	0.00225211		CASSISDWGGYEQYF	171	0.00239346		CASSGLGGAEQF	151	0.00190748		CASSWDSYAEQSF	122	0.00155336
CASSGGTVNSDYTF	3916	0.0530786		CASSDRNSDYTF	4154	0.0543166		CSADLGRQSTLYF	201	0.00287041		CSADGRNTEVLF	239	0.00385478		CSAGGRGYEQYF	158	0.00195109		CASGDRDREDERLF	187	0.00288647		CASSIENF	174	0.00223924		CSSVSAETLHF	171	0.00239346		CASSLRDNYAEQLF	150	0.00189485		CASSPTASNERSF	122	0.00155336
CASGEGTGGNQDTQYF	3916	0.0530786		CASGDDWGGQNTLYF	4140	0.0541335		CSAGNRDTQYF	200	0.00285613		CTRSADRAGGAETLYF	238	0.00383865		CGASRDPGGDTQYF	158	0.00195109		CASSSQDTQYF	183	0.00282473		CSVLRDRNTEVF	174	0.00223924		CSAAAGGHERLF	171	0.00239346		CASGDMDGYEQYF	150	0.00189485		CASSHI_GYEQYF	122	0.00155336
CASGDFKGLGYAEQF	3909	0.0529837		CASSQVGTDNQAQHF	4132	0.0540289		CTRSADPTDNSPLYF	197	0.00281328		CASSPWDWGYAGQF	238	0.00383865		CSAGGDRAPAETLYF	158	0.00195109		CTRSALGVQDTQYF	183	0.00282473		CSAYRGPNSDYAF	174	0.00223924		CSDRFSDERLF	171	0.00239346		CSAVWGDERYF	150	0.00189485		CAGSWDSYAEQF	121	0.00154063
CASSDTGFYEQYF	3905	0.0529295		CASSLDFGAGSDYTF	4132	0.0540289		CASGGGGHFSGKTLYF	196	0.002799		CSADANNERF	237	0.00382252		CSADGASTEVF	158	0.00195109		CASSDGPNSDYTF	181	0.00279386		CGAVSQNTLYF	173	0.00222637		CRLGGGTLYF	170	0.00237946		CASRKTGPNSDYTF	149	0.00188222		CASSPGAGDYNNQAPLF	121	0.00154063
CASGDGTGGSNSDYTF	3902	0.0528888		CSADWGAETLYF	4124	0.0539243		CGAGDTEVF	196	0.002799		CAWRDRRRDSDYTF	236	0.00380639		CAWSLTGGVHAEQF	158	0.00195109		CASGKQNTEVF	181	0.00279386		CASSQDLAGGHAEQF	172	0.00221351		CSAARETHAEQF	170	0.00237946		CASSLGDANTEVF	149	0.00188222		CASSLDGTANSDYTF	121	0.00154063
CASGERKISNERLF	3889	0.0527126		CASSPTGGTEVF	4116	0.0538197		CASSERQGNEQYF	195	0.00278472		CASNRGDAQYF	235	0.00379026		CSAGGTEVF	157	0.00193874		CSVRTGNERLF	181	0.00279386		CASSAAGGNQDTQYF	172	0.00221351		CSAGQYNAETLYF	170	0.00237946		CSPRGGANTEVF	149	0.00188222		CASSLTASNERLF	121	0.00154063
CASSDAGGSQNTLYF	3884	0.0526448		CASSLRTGGNTEVF	4115	0.0538066		CASGDAQKDTEVF	195	0.00278472		CSADRAGGAEALYF	235	0.00379026		CTRSADRGAAPLF	156	0.00192639		CSADPFNSGNTLHF	181	0.00279386		CSADYNSHNSPLYF	172	0.00221351		CASSLDRAQDTQYF	169	0.00236546		CSETVSNVRLF	149	0.00188222		CASSLWYYELYF	121	0.00154063
CAWSLGVNQDTQYF	3883	0.0526313		CASSSRTDYAEQF	4108	0.0537151		CSTVRDSNTGQLYF	195	0.00278472		CASSRDWAQDTQYF	233	0.003758		CSARDSNYAEQSF	155	0.00191405		CASSDANTEAF	180	0.00277842		CSANSGGNYAEQF	172	0.00221351		CGADASSYEQYF	169	0.00236546		CAWSRGARGTQYF	149	0.00188222		CASSQQGAYNSPLHF	120	0.0015279
CASSGTGENTLYF	3873	0.0524957		CSAAGTGGNTLYF	4072	0.0532444		CSAAQGNTEVSF	194	0.00277044		CSAGGRNTEVF	233	0.003758		CTRSAGQYNSPLYF	155	0.00191405		CAWSPGGSAETLYF	180	0.00277842		CASGPDSSYEQYF	171	0.00220064		CASSTRSQDTLYF	169	0.00236546		CASSLRGNYAEQF	148	0.00186959		CSAPWGQNTSYF	120	0.0015279
CASGDALEASQNTLYF	3870	0.0524551		CASGDNRQVF	4056	0.0530352		CASGETGRSTEVF	194	0.00277044		CVSSLDKSYEQYF	232	0.00374187		CANSQDWGGNNQAPLF	154	0.0019017		CSGDGYERYF	179	0.00276298		CSADVGGLHAEQF	171	0.00220064		CASSQSPGTAYEQYF	168	0.00235147		CSAGDWGDAQYF	148	0.00186959		CASRGVSYEQYF	120	0.0015279
CASSFAGQLYF	3870	0.0524551		CAWSLTGGF	4055	0.0530221		CASGAAGGSDYTF	194	0.00277044		CASSDTGEDSDYTF	229	0.00369349		CSATGAGGNTLYF	154	0.0019017		CASSLGDIFSSERLF	179	0.00276298		CGPYREGEVF	171	0.00220064		CASSQGADWAYAEQF	168	0.00235147		CVSSPSNTEVF	148	0.00186959		CASSGTGVSSDYTF	120	0.0015279
CASRDDNQAPLF	3862	0.0523466		CASSPGTGDYAEQF	4049	0.0529436		CVSGETGGSTEVF	193	0.00275616		CSADGRDTEVF	227	0.00366123		CASSPGPFYEQYF	154	0.0019017		CASSDVCYEQYF	179	0.00276298		CSAYRGPNSDHTF	170	0.00218777		CASSGGQGWAETLYF	167	0.00233747		CCETVSNERLF	147	0.00185695		CSGTGRTRAETLYF	120	0.0015279
CASGVGGDTEVF	3861	0.0523331		CASSQDGQGWEQYF	4048	0.0529306		CTSSQDGGDTEVF	193	0.00275616		CASSPDKTYEQSF	227	0.00366123		CNGDNSQNTLYF	154	0.0019017		CSAEAYGQYF	179	0.00276298		CSADRRGRNSPLYF	170	0.00218777		CSGGQTNTEVSF	167	0.00233747		CASSLDRGDSGNALYF	147	0.00185695		CANSQDGTANSDYTF	119	0.00151517
CASGVGTGANSDYTF	3858	0.0522924		CASSLTRGHTEVF	4046	0.0529044		CSAEYTEQF	192	0.00274188		CGADRAGGAETLYF	226	0.0036451		CSAGEGNYAEQF	153	0.00188935		CSAGPDTGVF	175	0.00270124		CASSQDPAGGRAEQF	170	0.00218777		CAGSQSPGTVYEQYF	167	0.00233747		CASSPQGANPDYTF	147	0.00185695		CASGDRQSQNTLYF	119	0.00151517
CASSRDRGQDTQYF	3854	0.0522382		CASSQAQGYEQYF	4040	0.052826		CSADRDSYDSPLYF	192	0.00274188		CASSDGANTEVF	224	0.00361284		CASSRGGREQYF	153	0.00188935		CSADRDWGAWLAGQF	173	0.00267037		CASSPDGSYEQYF	170	0.00218777		CASSQSGDSNQDTQYF	166	0.00232347		CTRSAVWGDEQYF	147	0.00185695		CASGGRQSQNTLCF	118	0.00150243
CASSTGGDTEVF	3854	0.0522382		CASSDAHANTEVF	4034	0.0527475		CSADQGWQNTLYF	191	0.0027276		CAWRNWDSAETPYF	219	0.0035322		CASGEGTGQDAQYF	153	0.00188935		CSAGPGTEVF	172	0.00265493		CASSQGQQDTQYF	169	0.0021749		CTRSADQGHTGQLYF	166	0.00232347		CTRSAVAGGASAETLYF	147	0.00185695		CSGTGRTSAETRYF	118	0.00150243
CASSDSRIQNTLYF	3839	0.0520349		CAWPPGQGGLSGNTLYF	4034	0.0527475		CSAVWDSNTGQLYF	190	0.00271332		CSADTQGLNERLF	213	0.00343543		CSGDNRQNTLYF	153	0.00188935		CASSDVGYAQYF	172	0.00265493		CTRSAEREENSPLYF	169	0.0021749		CASGALQGWAETLYF	166	0.00232347		CSADIWGGGDAQYF	147	0.00185695		CASSLSDFSYAEQF	118	0.00150243
CASGGQGDYAEQF	3835	0.0519807		CATLGAGQNTLYF	4032	0.0527214		CSADQGQQNTLYF	189	0.00269904		CSADGNNERLF	213	0.00343543		CASSQDGGVQGTQYF	153	0.00188935		CSVDPFNSGNTLYF	172	0.00265493		CSAYRGPNSGYTF	169	0.0021749		CRDSYEQYF	166	0.00232347		CASRGQGQNTLYF	147	0.00185695		CANSQEGVGGRRSAETLYF	118	0.00150243
CAWSQTDANSDYTF	3824	0.0518316		CASSQELGYEQYF	4028	0.0526691		CASGESQGNEQYF	188	0.00268476		CASSGSGGEQYF	213	0.00343543		CSATGVGGNTPYF	153	0.00188935		CTSSARTGNERLF	171	0.0026395		CASSQDLANIEVF	169	0.0021749		CANSTTPNSDYTF	165	0.00230948		CASSPDRGANTGQLYF	147	0.00185695		CASNQEGVGGRRSAETLYF	117	0.0014897
CASGPGLGGYEQYF	3803	0.0515469		CASSPRTGGPNQDTQYF	4027	0.052656		CSPGQSNTEVSF	186	0.0026562		CASSLDKSYEQSF	213	0.00343543		CASGGGQGDYAEQF	153	0.00188935		CSAPGTGANTEVF	169	0.00260863		CASRGLGGDEQHF	169	0.0021749		CVSSLAGQLYF	165	0.00230948		CSAGDGGAETLYF	147	0.00185695		CSARLGGPSAETRYF	117	0.0014897
CASSDGTGYEQYF	3801	0.0515198		CSENRDEQYF	4024	0.0526167		CSAVQGNTEVF	186	0.0026562		CVSSPDKTYEQYF	213	0.00343543		CASSLKTNSNTAVF	153	0.00188935		CAWSLGGGAETLYF	168	0.00259319		CSKRDWGGEALYF	169	0.0021749		CSTSRGQDTQYF	165	0.00230948		CASSDANSDYTF	147	0.00185695		CTSSQDGGEVF	117	0.0014897
CASSFSYEQYF	3794	0.0514249		CSARTGSQNTLYF	4017	0.0525252		CSGGTNNQAPLF	186	0.0026562		CASSLRGISYEQYF	212	0.0034193		CAGSLNRDTQYF	153	0.00188935		CAWSLGGSAETLHF	167	0.00257776		CSADPVDTLYF	168	0.00216203		CASSERQANTGQLYF	164	0.00229548		CASSPAGAETLCF	147	0.00185695		CSASGHRASAETLYF	117	0.0014897
CASSGQGGYTEVF	3792	0.0513978		CASSQDRQGRDTQYF	4008	0.0524075		CSTGGNTEVF	186	0.0026562		CAGSGTGGAEVF	210	0.00338704		CASSQKTNSNTEVF	153	0.00188935		CSDRGPNTEAF	167	0.00257776		CAWSRTFNNQAQHF	168	0.00216203		CAWSLETGRDEQYF	164	0.00229548		CASSLDRGDSGDTLYF	146	0.00184432		CSGQNHDTQYF	117	0.0014897
CASSDGQGGYEQYF	3784	0.0512894		CASSSGQGDTGQLYF	4002	0.0523291		CASSDAQKDTEVLF	186	0.0026562		CSADREDTHYF	210	0.00338704		CGADGDRAPAETLYF	152	0.001877		CSGRGPNTEVF	166	0.00256232		CSAEGANQDIQYF	167	0.00214916		CSEAGPQDTQYF	164	0.00229548		CSADWGAYERYF	146	0.00184432		CASGRRASAETLYF	117	0.0014897
CASGDAGGASAETLYF	3780	0.0512352		CSAESNSYEQYF	4001	0.052316		CASGDASDERLF	185	0.00264192		CSADATNERLF	207	0.00333866		CTRSNPTGGPNQDTQYF	152	0.001877		CASRGQNSNERLF	165	0.00254689		CASSMDTNSPLYF	167	0.00214916		CANSLAGQLYF	163	0.00228148		CSAREGDTQYF	146	0.00184432		CTSSGTGRTSAETLYF	117	0.0014897
CASGDSWDRADEQYF	3771	0.0511132		CASGDRGGAGDTQYF	3997	0.0522637		CGPGQSNTEVF	185	0.00264192		CASSLAVGQNTLYF	206	0.00332253		CASSLVGADTEVF	151	0.00186465		CSADPSNSGNTLYF	163	0.00251601		CSADRVTEVF	167	0.00214916		CAGSALQGWAETLYF	163	0.00228148		CASSRQGPSQSTLYF	146	0.00184432		CASSGLGGTEEF	116	0.00147697
CASGDALGSYAEQF	3764	0.0510183		CSARQGRGAETLYF	3995	0.0522376		CSADLGRQNALYF	185	0.00264192		CSAAANNERLF	205	0.0033064		CASGDKADYTF	150	0.0018523		CSAAGAANTEVF	162	0.00250058		CSAEGEENSPLYF	167	0.00214916		CASSAPGQYEQYF	163	0.00228148		CANSLSWGYEQYF	146	0.00184432		CSGTGGPSAETLYF	116	0.00147697
CASGDALNQDTQYF	3751	0.0508421		CASSDDAETLYF	3986	0.0521199		CSAGGRFYGNTLYF	184	0.00262764		CASSDEGDEQ_F	205	0.0033064		CSAGRGAAPLF	150	0.0018523		CSDRGPNTEVLF	162	0.00250058		CVSGAAGGNQDTQYF	167	0.00214916		CSANQYNAETLYF	163	0.00228148		CSAPQWGQDTQYF	145	0.00183169		CASGDTNSNYTF	116	0.00147697
CASGDGTGRGTGQLYF	3751	0.0508421		CASSQDQGYNSPLYF	3984	0.0520937		CASGPRDNYAEQF	184	0.00262764		CASSDAGDSPHYF	204	0.00329027		CASSQDGGAVAETLCF	150	0.0018523		CSAGDSQSTLYF	160	0.00246971		CSAYRGPSSDYTF	166	0.00213629		CRDNYKQYF	163	0.00228148		CASSLDGGDSGNTLYF	145	0.00183169		CASSRTIN_DTQYF	116	0.00147697
CAWSLEGEEQYF	3737	0.0506524		CASGEGQGKYEQYF	3983	0.0520806		CGAAGNSPLYF	183	0.00261336		CASSLRLGISAETLYF	203	0.00327414		CASSSDRNSDYTF	150	0.0018523		CAWSLGDSAETLYF	159	0.00245427		CASSLPGRDNRAQHF	166	0.00213629		CASRESGGGQNTLYF	162	0.00226749		CASSDAGTGDAGQF	145	0.00183169		CASSQQDTQCF	116	0.00147697
CASNPGHNNQAPLF	3735	0.0506252		CASSPSATGISYEQYF	3980	0.0520414		CASGETGESTEVF	183	0.00261336		CASSPWDWGHAEQF	203	0.00327414		CGINSGNTLYF	150	0.0018523		CASSQRQGAGTEGLF	159	0.00245427		CASRGGSYEQYF	165	0.00212342		CASSQSETQREYF	162	0.00226749		CSADRADTEVSF	145	0.00183169		CASGGPRGSNTEVF	115	0.00146424
CASGDATPSQNTLYF	3728	0.0505304		CASSPEGGARAETLYF	3958	0.0517537		CSAAGGDTEVLF	182	0.00259907		CSADANNERVF	203	0.00327414		CASSDWDNSYEQCF	149	0.00183995		CSAAGTANTEAF	157	0.0024234		CGAEGANQDTQYF	164	0.00211055		CASGDATFPNERLF	162	0.00226749		CASSLLGQGYAEQLF	145	0.00183169		CSARLGGPNAETLYF	115	0.00146424
CASGARDREGYTF	3725	0.0504897		CASSDVRATEVF	3952	0.0516753		CASGDHWANQDTQYF	182	0.00259907		CTGSADANNERLF	202	0.00325801		CKPGLGDAEQLF	149	0.00183995		CSASGGSAETPYF	156	0.00240796		CSAVSRNTLYF	164	0.00211055		CRDNYERYF	162	0.00226749		CSADWGGAAGTLYF	145	0.00183169		CASGDAAGGYAEQF	115	0.00146424
CASSPGGNYAEQF	3723	0.0504626		CASSDADRTNTEVF	3939	0.0515053		CASGDASNGRLF	181	0.00258479		CGARGTVNSPLYF	199	0.00320963		CAGSQDNQDTQYF	149	0.00183995		CTRSAAGTANTEVF	155	0.00239253		CTRSADRQGRNSPLYF	164	0.00211055		CSALGGLAE_F	162	0.00226749		CSAEGQGTGQLYF	145	0.00183169		CASSQGGAYNSPLYF	115	0.00146424
CAWSPTSNSDYTF	3717	0.0503813		CSAGLGEQNTLHF	3917	0.0512176		CSADMGGSSYEQYF	181	0.00258479		CASSP_DWGYAEQF	199	0.00320963		CSAPTGGGGA_TLYF	149	0.00183995		CASRAEGTEVF	155	0.00239253		CASGLRGDTEVF	164	0.00211055		CASSMSSYEQYF	161	0.00225349		CSADTGGNSPPYF	145	0.00183169		CASSITASSDYTF	115	0.00146424
CASSLSGVSNERLF	3716	0.0503677		CASSDPNERLF	3916	0.0512046		CASSDASNERLF	180	0.00257051		CASSPGQGDTQYF	197	0.00317737		CSSTAASSNERLF	149	0.00183995		CSATGPNEK_SF	154	0.00237709		CSTRRGANTEVF	163	0.00209768		CSGDGEVF	161	0.00225349		CASRRTGSNSDYTF	145	0.00183169		CAGSDALNSDYTF	115	0.00146424
CASGEPLGGRAETLYF	3713	0.0503271		CSAGEGNTEVF	3902	0.0510215		CASGDASNERSF	180	0.00257051		CASSDEGDSPLYF	197	0.00317737		CSAGQRSSPLYF	149	0.00183995		CASSDRPNSDYAF	154	0.00237709		CNALRDRNTEVF	163	0.00209768		CSTGPGYTF	161	0.00225349		CASSLDGGANTGQLYF	145	0.00183169		CSADEGFYNSPLYF	115	0.00146424
CASGADRGDQDTQYF	3711	0.0502999		CASSVANTEVF	3900	0.0509954		CSADQGADDERLF	178	0.00254195		CSADANNESLF	195	0.00314511		CTRSATGINQAPLF	149	0.00183995		CTRSADLGSAETLYF	153	0.00236166		CASSPGSSYEQYF	163	0.00209768		CSAGTAYAEQF	161	0.00225349		CAGSQGGTGVDTQYF	145	0.00183169		CASSPGTGDYNDQAPLF	114	0.0014515
CASSDGREGAETLYF	3690	0.0500153		CASGEYRGQGSDYTF	3898	0.0509692		CSPGQSNAEVF	177	0.00252767		CASSPRGISGNTPYF	195	0.00314511		CASGDRADCTF	148	0.0018276		CSLLGNQDTQYF	153	0.00236166		CNAGDNYEQYF	163	0.00209768		CASSESGGSQNTLYF	161	0.00225349		CASSQEGYYAEQF	144	0.00181906		CASSIWYYEQYF	114	0.0014515
CASGDQDRDNQDTQYF	3684	0.049934		CASSSWGGGNTEVF	3895	0.05093		CASSGAQKDTEVF	176	0.00251339		CSADANNARLF	195	0.00314511		CASSQGLGGRGAEQSF	148	0.0018276		CASSQDRGRGTQYF	153	0.00236166		CASGAVGGNQDTQYF	163	0.00209768		CASSMRAEQF	160	0.00223949		CAGSDGFTLYF	144	0.00181906		CASNHIWGYEQYF	113	0.00143877
CASGEGIQDTQYF	3684	0.049934		CASSGDRSNERLF	3889	0.0508515		CSADPGRQNTLYF	175	0.00249911		CAGSDTGGVEQYF	193	0.00311285		CASSGTSTGVF	148	0.0018276		CSGTGGQDTQYF	153	0.00236166		CSADRANTGQLHF	162	0.00208481		CSADASSYEQCF	160	0.00223949		CSLEIQSSEAGDSALYLRASSPDRDGNTLYF	143	0.00180642		CASSLWYYEHYF	112	0.00142604
CASGPGQYEQYF	3681	0.0498933		CASSGDWGLYAEQF	3878	0.0507077		CASSDQSYAEQSF	175	0.00249911		CASSPGNTEVF	191	0.00308059		CSADRNTEAF	148	0.0018276		CSVGQGGSNERSF	152	0.00234622		CASGAARGNQDTQYF	162	0.00208481		CSAGTVYAGQF	159	0.0022255		CASGDVRNTGQLYF	143	0.00180642		CASS_EGVGGRRSAETLYF	112	0.00142604
CASSEGTGQNTLYF	3680	0.0498798		CASSGRGHTEVF	3874	0.0506554		CSAGRTSAETLYF	174	0.00248483		CASSDAGDSPL_F	190	0.00306447		CTRSAGQRNSPLYF	148	0.0018276		CASGDATGGASAETPYF	152	0.00234622		CASRPPGGYAEQF	161	0.00207194		CASSEGQADTGQLYF	159	0.0022255		CASGPDRDGNTLYF	143	0.00180642		CASGDRGTENTEAF	112	0.00142604
CASGDRGTEVF	3680	0.0498798		CASSRGYSPLYF	3872	0.0506292		CANMSQGRTLYCTCSAVRDSNTGQLYF	174	0.00248483		CGADGRNTEVF	188	0.00303221		CASSDRGQDTQYF	148	0.0018276		CSAVQNEK_SF	152	0.00234622		CTRLAGGYAEQF	161	0.00207194		CANSGINQDTQYF	159	0.0022255		CASSPQGADSDYTF	143	0.00180642		CASSHIWYYEQYF	112	0.00142604
CAWSFGQYEQYF	3672	0.0497713		CASGSSQAPLF	3867	0.0505639		CSADLGRQDTLYF	173	0.00247055		CSADANNERLCF	188	0.00303221		CSSTAAFSDERLF	148	0.0018276		CSAGTNTGRLYF	150	0.00231535		CSADRQGRDSPLYF	160	0.00205908		CAGSQDADWAYAEQF	159	0.0022255		CTRSADTGGNSPLYF	143	0.00180642		CASSALGGTEQF	112	0.00142604
CASSGTTSAETLYF	3664	0.0496629		CASSGTGF	3865	0.0505377		CASSDVGCEQYF	173	0.00247055		CASSPDETYEQYF	187	0.00301608		CASSQGGRGQYF	148	0.0018276		CSASGTDANTEVF	150	0.00231535		CGGGTKNTLYF	160	0.00205908		CASSHPGQGSNERLVF	159	0.0022255		CSAAQGHSGNTPYF	142	0.00179379		CASCHPGTEVF	111	0.00141331
CASGDGTGGGQNTLYF	3660	0.0496087		CASGGQGVDAETLYF	3851	0.0503546		CASGETGGSTKVF	172	0.00245627		CASSWDRAEQF	186	0.00299995		CASSPRGRQNTSYF	147	0.00181526		CASSQTGNN_APLF	149	0.00229991		CAGSPGTGINEQYF	160	0.00205908		CGSVSAETLYF	158	0.0022115		CSAGTGSTEVF	142	0.00179379		CTSGQGGGRSYEQYF	110	0.00140057
CASPTGGGNTQYF	3659	0.0495951		CASSLSKVGNTEVF	3845	0.0502762		CSAVRDSHTGQLYF	171	0.00244199		CASSPWD_GYAEQF	185	0.00298382		CANMSQGRTLYCTCSARGTEVF	147	0.00181526		CASGEMNTTEVF	149	0.00229991		CGTRQGANTEVF	160	0.00205908		CRPGGETLYF	158	0.0022115		CVSSLLGQGYAEQF	142	0.00179379		CASSQDGTANSNYTF	110	0.00140057
CASSLSGVSNGRLF	3653	0.0495138		CASRDTGGAETLYF	3838	0.0501847		CSPRQSNTEVF	171	0.00244199		CASSRQGAQNTLYF	184	0.00296769		CASSLLGRGGEQYF	147	0.00181526		CSADWGEVTETLYF	149	0.00229991		CGDRQGNTEVF	160	0.00205908		CASSLVGQLYF	158	0.0022115		CSAGTGNTEAF	141	0.00178116		CASSGTGVNSDYAF	110	0.00140057
CASGDWGAYEQYF	3648	0.049446		CASSPGQYNSPLYF	3836	0.0501585		CSADGLGGCAEQF	170	0.00242771		CASSADANNERLF	183	0.00295156		CSPGLGGQDAQYF	147	0.00181526		CSAEGGGFGNTPYF	149	0.00229991		CSAPGGYNQAQHF	159	0.00204621		CAWSHISQILENSQSGS_AKIQRF	158	0.0022115		CASRVSYNPPLYF	141	0.00178116		CASGGRQSQNTEVF	110	0.00140057
CSADSHFSNERLF	3634	0.0492563		CASSVINYAEQF	3836	0.0501585		CAGSDAQKDTEVF	170	0.00242771		CAWGLGAANTEVF	182	0.00293544		CASSDWDNSHEQYF	147	0.00181526		CSAPGTDADTEVF	148	0.00228448		CASSQEQGDSYEQYF	159	0.00204621		CSALGGLVEQF	158	0.0022115		CASRRTGPNSDYIF	141	0.00178116		CASGQGGGRSYEQYF	110	0.00140057
CASRATEVF	3626	0.0491478		CASSQGTGGSEVF	3825	0.0500147		CARSLPRGSNTGQLYF	170	0.00242771		CANMSQGRTLYCTCSADANNERLF	182	0.00293544		CASSLKTNSITEVF	147	0.00181526		CSAGGQKNEK_SF	147	0.00226904		CASSGDNQAQHF	158	0.00203334		CASARDNYAEQSF	157	0.0021975		CASSQGTINTGQLYF	141	0.00178116		CNAGQGANTGQLYF	109	0.00138784
CASGGPGTF	3625	0.0491343		CASSQEQISNERLF	3822	0.0499755		CSPGQSSTEVF	170	0.00242771		CSAVNQGTQYF	180	0.00290318		CTRSAVDRGLDTQYF	147	0.00181526		CSAPGADANTEVF	147	0.00226904		CAGSPSGNYEQYF	158	0.00203334		CTSSLAGQLYF	157	0.0021975		CASSPQGANSGYTF	141	0.00178116		CVSGDTNSDYTF	109	0.00138784
CASSPWDNQAPLF	3622	0.0490936		CASSPRDRDNSPLYF	3818	0.0499231		CSGQSQSTLYF	167	0.00238487		CSADANNEILF	180	0.00290318		CASSQDGTTNTEVF	147	0.00181526		CASSHVGYEQYF	147	0.00226904		CSRRDWGGETLYF	158	0.00203334		CASSQDRLGGSQNALYF	157	0.0021975		CTRSAAQGHSGNTLYF	141	0.00178116		CASGDRGTESTEVF	109	0.00138784
CASSEGYEQYF	3604	0.0488496		CASGDRDRGGSQNTLYF	3817	0.0499101		CSAGRAEQSF	167	0.00238487		CASSCGRGSNYAEQF	179	0.00288705		CTRSADRGQNTLYF	147	0.00181526		CASSDVRYEQYF	147	0.00226904		CSAGDNHEQYF	158	0.00203334		CASGAWTGQDTLYF	157	0.0021975		CTRSADWGASTEVF	141	0.00178116		CVSSQQDTQYF	109	0.00138784
CASGGTGGGQDTQYF	3603	0.0488361		CASSFGNSGNTLYF	3816	0.049897		CSADISTEVF	165	0.0023563		CSADGAGGAETLYF	178	0.00287092		CSAEGAKEDF	147	0.00181526		CSADLRSAETLYF	146	0.00225361		CSTGDNYEQYF	157	0.00202047		CAGSQARGAEQF	156	0.00218351		CSADPGHSTLYF	141	0.00178116		CASRGISYEQCF	108	0.00137511
CASSDGGGYEQYF	3598	0.0487683		CASSQGQGSSDYTF	3814	0.0498708		CSAELGRQNTLYF	165	0.0023563		CSAVGGK_EQYF	178	0.00287092		CGADNRGQNTLYF	147	0.00181526		CSTDPFNSGNTLYF	146	0.00225361		CSRHTSQNTLYF	156	0.0020076		CAWSHWGNYAERF	156	0.00218351		CSAARGHSGNTLYF	141	0.00178116		CASSPGTGGYNNQAPLF	108	0.00137511
CASGDELGLQDTQYF	3597	0.0487548		CASSQVGTEVF	3810	0.0498185		CSAAGNSPPYF	164	0.00234202		CASSQDLGYNNQAPLF	177	0.00285479		CSVGQDTGQLYF	146	0.00180291		CSAPGTDANTEAF	146	0.00225361		CASSQARGRSPLHF	155	0.00199473		CGPRQFSNERLF	156	0.00218351		CASRRTEPNSDYTF	140	0.00176853		CASSWDSCAEQF	108	0.00137511
CASGPGGGTEVF	3588	0.0486328		CASSDRTGDTQYF	3805	0.0497532		CSAGQGNTEVF	164	0.00234202		CASGAGQTNERLF	177	0.00285479		CASSDEGGADSDYTF	146	0.00180291		CSAEPAYEQYF	145	0.00223817		CAWRRTLNNQAQHF	155	0.00199473		CANGAWTGQNTLYF	156	0.00218351		CASSAGTASGSTLYF	140	0.00176853		CSLTGVNLAPLF	108	0.00137511
CASGETGEEVF	3581	0.0485379		CASGDGTGGNERLF	3804	0.0497401		CTRSAGNQDTQYF	164	0.00234202		CSAVANNERLF	174	0.00280641		CASSYPGGTTGQLYF	146	0.00180291		CASGPGLGAGQNTLYF	145	0.00223817		CSAEALNQDTRYF	155	0.00199473		CSAE_GQAPLF	156	0.00218351		CASSLDRGANTGQPYF	140	0.00176853		CVSSPGTGDYNNQAPPF	107	0.00136238
CASGDGTGGYEQYF	3579	0.0485108		CASSSPNERLF	3797	0.0496486		CASSEILGGYELYF	162	0.00231346		CASGDAPGQNSGNTLYF	174	0.00280641		CAGSPRGRQNTLYF	146	0.00180291		CAPGTDANTEVF	144	0.00222274		CSAGGANQDTQYF	154	0.00198186		CGTGPDYTF	156	0.00218351		CAGSLEDSQNTLYF	140	0.00176853		CSADKGSYNSPLYF	107	0.00136238
CASGDARGPGQNTLYF	3576	0.0484701		CSAGGGAETLYF	3796	0.0496355		CTSGDASNERLF	162	0.00231346		CSAGRAGGAETLYF	173	0.00279028		CSADEGNYAEQLF	146	0.00180291		CSARTGNERSF	143	0.0022073		CSAGRDISYNSPLHF	154	0.00198186		CARSQSRDHYAEQF	155	0.00216951		CASGQGGLQDTQYF	140	0.00176853		CASSQDTGGYAEQSF	107	0.00136238
CASSDLYEQYF	3568	0.0483617		CASRLGRDERLF	3795	0.0496224		CSAASLGGRDAQYF	161	0.00229918		CASSPNKTYEQYF	172	0.00277415		CSAPQSNYAEQF	146	0.00180291		CASSQETGRQDTLYF	142	0.00219186		CSADWGSYERYF	153	0.00196899		CASSHRDREDEQYF	155	0.00216951		CASSHRGPQDTQYF	140	0.00176853		CTCSGTGRTSAETLYF	107	0.00136238
CASSSKDWGSQNTLYF	3565	0.048321		CASSQGNNQAPLF	3781	0.0494393		CASSGQSYAEQF	161	0.00229918		CASGREGNERLF	172	0.00277415		CASSLNTNSNTEVF	146	0.00180291		CSAVRDSQSTLYF	141	0.00217643		CSAGRDIPYNSPLYF	153	0.00196899		CSAGAVYAEQF	154	0.00215551		CSETVTNERLF	139	0.00175589		CASSGTGVNSDCTF	106	0.00134964
CASGARNSDYTF	3558	0.0482261		CSGRDWGAEQYF	3768	0.0492694		CAGGDGGVDTQYF	161	0.00229918		CASFPDKTYEQYF	171	0.00275802		CSAEGLGGGQNTLYF	145	0.00179056		CSADWGGAAGVF	141	0.00217643		CASSQGGSPYAEQF	153	0.00196899		CASSQARSQSTLYF	154	0.00215551		CSAGTGNTEVLF	139	0.00175589		CTSGDTNSDYTF	106	0.00134964
CASSSTGVNYAEQF	3546	0.0480635		CASSDRNSPLYF	3755	0.0490994		CASSDRLGGEDTQYF	161	0.00229918		CSADYTEVSF	171	0.00275802		CRVSGSVTEVF	145	0.00179056		CRADAENTLYF	140	0.00216099		CSALQDRNTEVF	153	0.00196899		CASSLAG_LYF	154	0.00215551		CVSSQGGTGVDTQYF	138	0.00174326		CSARNQAPF	105	0.00133691
CASSPAGGNQAPLF	3534	0.0479008		CASRGVYEQYF	3753	0.0490732		CSAEGQGAGQPYF	160	0.0022849		CASSLYQTNSDYTF	169	0.00272576		CASSPGLFYGQYF	145	0.00179056		CSAAGTANTEVLF	140	0.00216099		CASSPNAETLYF	153	0.00196899		CSDRFSNERLSF	153	0.00214152		CASSRPLGSQNTLYF	138	0.00174326		CASSQEGVGERRSAETLYF	105	0.00133691
CASGLTEQYF	3534	0.0479008		CASSLEQGAYAEQF	3751	0.0490471		CSAGNQGTQYF	159	0.00227062		CANSPWDWGYAEQF	169	0.00272576		CAWSLTGGVCAEQF	145	0.00179056		CASRIRGLSNEGLF	139	0.00214556		CASSQGQDTEQLYF	153	0.00196899		CTYSAAGTGVAEQF	153	0.00214152		CASSRQGPSQDTLYF	137	0.00173063		CTSSRGGGRSYEQYF	105	0.00133691
CASGDGLGGRWEQYF	3529	0.0478331		CASGDAGVSNERLF	3749	0.0490209		CTRSADPETLYF	159	0.00227062		CASSDAGESPLYF	169	0.00272576		CASSDRD_DTQYF	145	0.00179056		CTRSAGPDTEVF	139	0.00214556		CTSSQDPAGGHAEQF	152	0.00195612		CRGTPYEQCF	152	0.00212752		CASSQEEDISYEQYF	137	0.00173063		CTSGGRQSQNTLYF	105	0.00133691
CASRDFYAEQF	3523	0.0477517		CASSTGVRTEVF	3747	0.0489948		CSADQDSYNSPLYF	159	0.00227062		CASSPWDWGYTEQF	168	0.00270963		CASGDWDNSYEQYF	145	0.00179056		CTRSAPGGTSQNTLYF	139	0.00214556		CSADPVNALYF	152	0.00195612		CASGARTGQNTLYF	152	0.00212752		CASGDTRNTGQLYF	137	0.00173063		CASSDTNSDYTF	105	0.00133691
CASGENWGGEQYF	3521	0.0477246		CASSDPDREEYEQYF	3733	0.0488117		CASGERQGNEQCF	159	0.00227062		CSDWEYYAEQF	167	0.0026935		CRVSGGVTEAF	145	0.00179056		CSAPGGTSQSTLYF	138	0.00213012		CSAGDNYEQHF	152	0.00195612		CASSQSRDH_AEQF	152	0.00212752		CASSLGRGANTGQLYF	136	0.001718		CASGQDTGGYAEQF	104	0.00132418
CASGEDRGNTEVF	3510	0.0475755		CASSRDNNQDTQYF	3731	0.0487856		CASGERQGNEQHF	159	0.00227062		CASGGAGGRGQDTQYF	166	0.00267738		CTRSAVANTGQLYF	144	0.00177821		CSGTEGPSAETLYF	137	0.00211469		CASGAAEGNQDTQYF	152	0.00195612		CASSQDWTGIGTQYF	152	0.00212752		CASSLGDREVSF	136	0.001718		CASSLSYYEQYF	104	0.00132418
CASGDAGTLYEQYF	3507	0.0475349		CASRPTFNYAEQF	3724	0.048694		CASGDVGYEQYF	159	0.00227062		CASGQDLSYNNQAPLF	166	0.00267738		CSAVANTGQPYF	144	0.00177821		CRNQDTQYF	137	0.00211469		CARSEGEQYF	152	0.00195612		CASSQSSDHYAEQF	152	0.00212752		CSAPHWGQVTQYF	136	0.001718		CSANEGSYNSPLYF	104	0.00132418
CASGESEGNSDYTF	3502	0.0474671		CASSLDRASYEQYF	3719	0.0486286		CTYSAVRDSNTGQLYF	158	0.00225634		CARSLGAANTEVF	164	0.00264512		CSVGQGNRAETLYF	144	0.00177821		CGAGQNNSPLYF	135	0.00208382		CASSIGGSTGQLYF	152	0.00195612		CSAVGTGVAEQF	152	0.00212752		CASSLEGQQNTQYF	136	0.001718		CNARNQAPLF	104	0.00132418
CASSQNTEVF	3480	0.0471689		CASSLRDNPYEQYF	3708	0.0484848		CTCSADQGRQNTLYF	156	0.00222778		CASGEDSANSDYTF	164	0.00264512		CSPGLGGQGTQYF	144	0.00177821		CAWSLGGSAGTLYF	135	0.00208382		CSACRGPNSDYTF	152	0.00195612		CSTGPDCTF	152	0.00212752		CASSQGQGQAF	136	0.001718		CSLTGVNPAPLF	104	0.00132418
CASSDVGAEQYF	3478	0.0471418		CASGDDLGGHNYAEQF	3707	0.0484717		CAGSPGTSSAETLYF	156	0.00222778		CASSATSAEALYF	161	0.00259673		CASGEGAGQDTQYF	144	0.00177821		CASSPTGGARDTQYF	135	0.00208382		CSASGGYSQAQHF	151	0.00194325		CASSDWDREVF	151	0.00211352		CSAPGGANTGQPYF	136	0.001718		CASRSGQEGTEAF	104	0.00132418
CAWSLGDWGLSAETLYF	3477	0.0471282		CASSQDSWGAQDTQYF	3703	0.0484194		CSPGRSNTEVF	156	0.00222778		CAWSHISQILQDRQLGSMTEK_SF	160	0.0025806		CTRSADEGNYAEQF	144	0.00177821		CASSDVGYEHYF	135	0.00208382		CSASGGYNRAQHF	151	0.00194325		CSETGPQDAQYF	151	0.00211352		CSAGWGAYEQYF	135	0.00170537		CSLSGVNQAPLF	103	0.00131145
CASGASGTINTEVF	3470	0.0470334		CASSQDIYEQYF	3702	0.0484064		CASSDAQKDTEAF	155	0.0022135		CASGEDDANSDYTF	158	0.00254835		CASSRQGTNSDYTF	144	0.00177821		CASSRLQGWDTQYF	135	0.00208382		CSADHANTGQLYF	151	0.00194325		CTYSDRFSNERLF	151	0.00211352		CASSDGGNYAEQLF	135	0.00170537		CASSQDGTEVF	103	0.00131145
CASGDRAGGAGQNTLYF	3457	0.0468572		CASGRQGDEQYF	3696	0.0483279		CASGETEGSTEVF	155	0.0022135		CASSQGLSYNNQAPLF	158	0.00254835		CSTNSGNTLYF	144	0.00177821		CTRSAGTGDNQAPLF	135	0.00208382		CASSQGLGGGGAEQYF	150	0.00193038		CASSQDADWAYAGQF	151	0.00211352		CASSLSRGVQNTLYF	135	0.00170537		CVSSPTASNERLF	103	0.00131145
CSADRGANTEVF	3457	0.0468572		CASSQDNGEQYF	3685	0.0481841		CSPGDRFYGNTLYF	154	0.00219922		CASSPWDWGYAEPF	157	0.00253222		CSADEGSYAEQF	144	0.00177821		CGDATGNERLF	134	0.00206838		CTSSQGQDTGQLYF	150	0.00193038		CASGGPGQGAEQLF	151	0.00211352		CASSQEGGPSYEQYF	135	0.00170537		CSLTGVTQAPLF	102	0.00129871
CASSPGTGEAETLYF	3457	0.0468572		CSADRRAGGGSSPLYF	3684	0.048171		CAGGDGGGQDTQYF	154	0.00219922		CASSFWRNSAETLYF	157	0.00253222		CASGPGQGANERLF	144	0.00177821		CSAVAENTLYF	134	0.00206838		CASSPGLGGPAKQF	149	0.00191751		CSADQHNAETLYF	151	0.00211352		CASSAPHWGQDTQYF	135	0.00170537		CRGQNQDTQYF	102	0.00129871
CASSQGGRSDYTF	3456	0.0468436		CASSSAYEQYF	3673	0.0480272		CASGQGRGTEVF	154	0.00219922		CASSLDKSYE_YF	156	0.00251609		CASSQDWGGDNQAPLF	143	0.00176586		CA_SLGGSAETLYF	134	0.00206838		CAWSLRDNTGQLHF	148	0.00190464		CSPRRFSNERLF	151	0.00211352		CASSRQGPSQNALYF	135	0.00170537		CSA_LGGPSAETLYF	102	0.00129871
CASGDAGQGVANTEVF	3454	0.0468165		CSADLQGQDTQYF	3664	0.0479095		CTRSAGRAEQF	153	0.00218494		CASSGAGGHEQYF	154	0.00248383		CGADQSGGGTQYF	142	0.00175351		CSAGRGQDTQYF	133	0.00205294		CSATEDEQYF	148	0.00190464		CAWSLGTRRDEQYF	150	0.00209952		CSETVSYERLF	135	0.00170537		CTSSHPGTEVF	101	0.00128598
CASSLFREQYF	3440	0.0466267		CSAVRGAEQYF	3651	0.0477395		CASGDQLGGSAEALYF	153	0.00218494		CSADAKNERLF	153	0.0024677		CSADNRGQSTLYF	142	0.00175351		CASGDGTNYAERF	132	0.00203751		CGKRDWGGETLYF	148	0.00190464		CSADNYE_YF	150	0.00209952		CASSQGGPQDTQYF	135	0.00170537		CVSSQGGGRSYEQYF	101	0.00128598
CASSPHSANTEVF	3439	0.0466132		CASGEPQGPYNSPLYF	3614	0.0472557		CAGGATGGSDYTF	153	0.00218494		CASGEDNANSDCTF	153	0.0024677		CASRDPGGDTQYF	142	0.00175351		CAKGRDQSTLYF	132	0.00203751		CSGPG_ANTEVF	147	0.00189178		CASSQDQNAEVF	150	0.00209952		CASSLGGREVF	134	0.00169273		CSHIWGYEQYF	101	0.00128598
CASGTDNNQAPLF	3413	0.0462608		CASSDRGTEVF	3601	0.0470857		CASSPGTSSAETPYF	152	0.00217066		CSADANNE_LF	153	0.0024677		CSAGHNNHAEQF	142	0.00175351		CASSFRDTANTEVF	132	0.00203751		CSADVGGLYAE_F	147	0.00189178		CASSQSRVHYAEQF	149	0.00208553		CASSRQGPQDTQYF	134	0.00169273		CASSLWDYEQYF	101	0.00128598
CASGAGTANTGQLYF	3403	0.0461252		CASSQDPVYAEQF	3591	0.046955		CSAANSGNTLYF	152	0.00217066		CSADANNVRLF	153	0.0024677		CGADEGNYAEQF	142	0.00175351		CTYSADPFNSGNTLYF	131	0.00202207		CASRPLGGDEQYF	147	0.00189178		CSADPAANTEVSF	149	0.00208553		CTYSARGGDTQYF	134	0.00169273		CASRGISYGQYF	101	0.00128598
CASSDAGQEDTQYF	3401	0.0460981		CASSEGQGGDTQYF	3590	0.0469419		CASSQVTGGKAEQF	151	0.00215638		CAWKGRGGSDYTF	152	0.00245157		CASSQNRNYAEQLF	142	0.00175351		CASSQGTGRQDTQYF	130	0.00200664		CSVDRATEVF	146	0.00187891		CGADPAANTEVF	149	0.00208553		CGTGGQDTQYF	134	0.00169273		CASSHPDTEVF	100	0.00127325
CASSLEHSAETLYF	3398	0.0460575		CASSSQNTLYF	3565	0.046615		CASGETGGDTEVF	150	0.00214209		CASSVRDTQYF	152	0.00245157		CSAGHWNSGNTLYF	141	0.00174116		CSAAGTANTEVSF	130	0.00200664		CSAD_GSYEQYF	146	0.00187891		CRDNYEQHF	149	0.00208553		CSAVWGGEQYF	134	0.00169273		CSAGQGATTGQLYF	100	0.00127325
CASGGSGGADAEQF	3392	0.0459761		CASSLGTTNTEVF	3556	0.0464973		CSARGWGDEQYF	150	0.00214209		CASSDAGDSPRYF	152	0.00245157		CASSQGQANSDYTF	141	0.00174116		CSDRGPNAEVF	130	0.00200664		CSTLRDRNTEVF	146	0.00187891		CASSQDRLGGSQNTSYF	149	0.00208553		CASRRTGPNSNYTF	134	0.00169273		CSASRGQNTGQLYF	100	0.00127325
CASGDAGTASAETLYF	3390	0.045949		CASGSDGSDYTF	3550	0.0464189		CASGDASNERLSF	150	0.00214209		CASSLGGNSDYTF	151	0.00243544		CSADEGNYAEQSF	141	0.00174116		CSADLGSAETPYF	129	0.0019912		CAWRRTFNNQAQRF	146	0.00187891		CAWSH_GNYAEQF	148	0.00207153		CASSLGHSGSTLYF	134	0.00169273		CASSQDGTGVNSDYTF	100	0.00127325
CASGEGGASAETLYF	3385	0.0458812		CASSQGQANTEVF	3548	0.0463927		CSARDWGGEQYF	149	0.00212781		CGADRGGITEVF	149	0.00240319		CSAEGLGGSQNALYF	141	0.00174116		CSAELSANAEVF	129	0.0019912		CTYSADRATEVF	146	0.00187891		CASGAWTGQNALYF	148	0.00207153		CASRGQSQNTSYF	133	0.0016801		CASGGPQGSDTEVF	100	0.00127325
CASSHTGGANTGQLYF	3385	0.0458812		CAWSLDRNSDYTF	3546	0.0463665		CTSGERQGNEQYF	149	0.00212781		CASRSTGGCNYAEQF	149	0.00240319		CSAGTGAEQF	141	0.00174116		CTRSGQGRNSPLYF	129	0.0019912		CTYSATGDSAETLYF	145	0.00186604		CRPGQNYAE_F	148	0.00207153		CANMSQGRTLYCTCSAERQGTGQLYF	133	0.0016801		CTSSGQNQDTQYF	100	0.00127325
CASGDDGGSQNTLYF	3384	0.0458677		CASRPGLGKDTQYF	3544	0.0463404		CASSPGQSNTEVF	148	0.00211353		CASSAWGSSQNALYF	149	0.00240319		CMALSSERLF	140	0.00172882		CSAEGRNSDYTF	129	0.0019912		CVSSQDLANTEVF	145	0.00186604		CASSQGRLGGSQNTLYF	148	0.00207153		CTRSADIWGGGDTQYF	133	0.0016801		CASRDREAF	100	0.00127325
CASSESTGRGTEVF	3372	0.045705		CASSDGDWGLENTLYF	3539	0.046275		CASSDAQKDAEVF	147	0.00209925		CASSRGLGGQNTLYF	148	0.00238706		CASSRDYTEQF	140	0.00172882		CTRSATGNTLYF	128	0.00197577		CSTDRATEVF	145	0.00186604		CASSQDWTGIDAQYF	148	0.00207153		CAGSLDRGDSGNTLYF	132	0.00166747		CASSHPGTEVSF	100	0.00127325
CASSLGTANTEVF	3365	0.0456102		CASSQGQNERLF	3538	0.0462619		CSADRADEQYF	147	0.00209925		CASSLTVSQDTLYF	148	0.00238706		CASSLKTNSKTEVF	140	0.00172882		CASSQDGTGGAERLF	128	0.00197577		CASSGDTRAQHF	145	0.00186604		CSAVARGHERLF	147	0.00205753		CASSRRGPSQNTLYF	132	0.00166747		CASGGRGTENTEVF	100	0.00127325
CASGDEGGETEVF	3364	0.0455966		CASRGQGDSDYTF	3530	0.0461573		CASGDRGNSGNTLYF	147	0.00209925		CSAVNQDAQYF	147	0.00237093		CSAEGQDAQYF	140	0.00172882		CASSDRPNSDHTF	128	0.00197577		CAGSPRGDTGQLYF	145	0.00186604		CASSQDADWAHAEQF	147	0.00205753		CASSRGGTGVDTQYF	132	0.00166747		CASSQQDTQHF	99	0.00126052
CASSQVKREDTQYF	3355	0.0454746		CAGSGASQGYEQYF	3528	0.0461312		CSPGQSDTEVF	147	0.00209925		CASGTGAE_F	147	0.00237093		CGARDSNYAEQF	140	0.00172882		CSADWGEVAETLHF	128	0.00197577		CSGGTRNTLYF	144	0.00185317		CASSPG_NNSPLYF	147	0.00205753		CASSLSQTEQLF	132	0.00166747		CASSDARDRDEQHF	99	0.00126052
CASGDATGGNERLF	3350	0.0454068		CASSQEGGAEVF	3521	0.0460397		CSAGRDSNTGQLYF	147	0.00209925		CASGEDNANSDHTF	146	0.0023548		CSADRSSYEQYF	140	0.00172882		CSADAENALYF	127	0.00196033		CSAGYNSPLYF	144	0.00185317		CASSALRGWAETLYF	146	0.00204354		CASSQESRVRDTQYF	132	0.00166747		CASSHIWGYE_YF	99	0.00126052
CASGDLGYNSPLYF	3349	0.0453933		CASSDATGQLYF	3521	0.0460397		CGAEGGGPSAETLYF	146	0.00208497		CASSLDKNYEQYF	146	0.0023548		CSAGAGVNQAPLF	140	0.00172882		CSAPGGTSQNTLHF	127	0.00196033		CASSLGLGGPAEQF	144	0.00185317		CAGSLTGVISNERLF	146	0.00204354		CASSGMDGYEQYF	132	0.00166747		CSARRGGPSAETLYF	99	0.00126052
CASGDGTGGVEQYF	3339	0.0452577		CASSPDWGNYAEQF	3520	0.0460266		CVSGERQGNEQYF	146	0.00208497		CVSSPWDWGYAEQF	146	0.0023548		CTRSADLGGNEQYF	139	0.00171647		CASSDRRRNTLYF	127	0.00196033		CASSPGRGNQDTQYF	144	0.00185317		CASSALQGWAEALYF	145	0.00202954		CGADWGGAAETLYF	131	0.00165484		CASGDATGGYAEQSF	98	0.00124778
CASGDASNSDYTF	3330	0.0451358		CASSPWGGDYAEQF	3518	0.0460004		CSPGQPNTEVF	146	0.00208497		CSADGRNTEVSF	146	0.0023548		CSAGQGAGNTLYF	139	0.00171647		CASSAGTVSNERLF	126	0.00194489		CSGTGGNTEVSF	144	0.00185317		CSADQGAETLHF	145	0.00202954		CSAPGGASTGQLYF	130	0.0016422		CASGHRASAETLHF	98	0.00124778
CSADAGGNYAEQF	3327	0.0450951		CASSPGHYEQYF	3511	0.0459089		CSATEDTQYF	145	0.00207069		CASSRDWGYEQYF	146	0.0023548		CSAVGDQDAQYF	139	0.00171647		CASSQGRGYNSLLYF	126	0.00194489		CSPCREGEVF	144	0.00185317		CAGSQDWTGIDTQYF	145	0.00202954		CAGGHYEQYF	130	0.0016422		CASSQEGVGGCRSAETLYF	98	0.00124778
CASRPGTNTEVF	3325	0.045068		CASSDPGSQNTLYF	3503	0.0458043		CASGETRGSTEVF	145	0.00207069		CASSLSRFSNERLF	146	0.0023548		CSNPAGGPNQDTQYF	139	0.00171647		CSVEQGGSNERLF	126	0.00194489		CASSPRGDAGQLYF	143	0.0018403		CSADASSHEQYF	145	0.00202954		CASSLRGRGTKVF	130	0.0016422		CSARNQASLF	98	0.00124778
CASGEGWVNYAEQF	3325	0.045068		CASSPGLFYEQYF	3499	0.045752		CSADGLGGYAEQSF	144	0.00205641		CASSPWDWDYAEQF	145	0.00233867		CASQGDRANSPLYF	138	0.00170412		CSAAGTASTEVF	125	0.00192946		CSADYNSYNSPLHF	143	0.0018403		CASSQRQGAEQLF	145	0.00202954		CASSRQGPSQNTSYF	130	0.0016422		CASSRTINQDTQHF	98	0.00124778
CASGDAGTQNTGQLYF	3325	0.045068		CAWVRDSTYEQYF	3494	0.0456866		CASSDVGYERYF	144	0.00205641		CSERGWGHQDTQYF	143	0.00230641		CASSQGLGGQGAEQF	138	0.00170412		CSADRDWGAWLAEQLF	125	0.00192946		CSADYDSYNSPLYF	143	0.0018403		CSTVAGGHERLF	145	0.00202954		CASSGTNSDYTF	129	0.00162957		CTSSAGVNTLYF	98	0.00124778
CASSDGTGGYEQYF	3304	0.0447833		CASSPTGREAPLF	3494	0.0456866		CASSDAQKGTEVF	143	0.00204213		CSADANKERLF	142	0.00229029		CASSGTSAEVF	138	0.00170412		CASGAGGRNTLYF	125	0.00192946		CAWRRTFSNQAQHF	143	0.0018403		CSAERHNSPLYF	145	0.00202954		CASSPLGQGYAEQF	129	0.00162957		CASGDATGGHAEQF	98	0.00124778
CASGEGGAGGNTLYF	3304	0.0447833		CSADWGTSAETLYF	3488	0.0456082		CSADPTGNSPLYF	141	0.00201357		CASSQDLSYNNQTPLF	141	0.00227416		CVSGDRADYTF	138	0.00170412		CASRYDAETLYF	125	0.00192946		CSTTGDEQYF	142	0.00182743		CASSSTGKQYF	145	0.00202954		CASGDGADTEVF	129	0.00162957		CASGDETGGIF	97	0.00123505
CASSPDRGYYAEQF	3302	0.0447562		CASSDRGLSNERLF	3480	0.0455035		CSAGLGDQDTQYF	141	0.00201357		CASSGRNSGNTLYF	141	0.00227416		CSAGQYDSPLYF	138	0.00170412		CASSLTGGYAEQF	124	0.00191402		CAWRRTFNDQAQHF	141	0.00181456		CASSQEDISNERLF	145	0.00202954		CASSFRRNQDTQYF	129	0.00162957		CSGQNQDTLYF	97	0.00123505
CASSGDWGIQDTQYF	3300	0.0447291		CASSRLGGRAEQF	3474	0.0454251		CASGDQSYAEQF	141	0.00201357		CTADANNERLF	140	0.00225803		CSAGGQRYEQYF	137	0.00169177		CASSDVGDEQYF	124	0.00191402		CNAPGADAEQF	141	0.00181456		CSADFRRNTGQLYF	145	0.00202954		CASSPQGANSYYTF	128	0.00161694		CASGDATGGYAGQF	97	0.00123505
CASSDVGNYAEQF	3295	0.0446614		CASSDGGYEQYF	3463	0.0452813		CTRSRVQDTQYF	141	0.00201357		CASSQDLSYSNQAPLF	140	0.00225803		CASSQGGGVQDTQYF	137	0.00169177		CSSGTGGGYAEQF	122	0.00188315		CSAGDNCEQYF	141	0.00181456		CASSLQDWGTSAETLYF	144	0.00201554		CSAEGRQAQHF	128	0.00161694		CSLTGVNQAPRF	97	0.00123505
CASSVRDTETLYF	3293	0.0446343		CASGDNNERLF	3461	0.0452551		CNAVRDSNTGQLYF	140	0.00199929		CASSLGQNSDYTF	139	0.0022419		CTRSADRFSYEQYF	137	0.00169177		CRRGINSDYTF	122	0.00188315		CSAGSGGNYAEQF	141	0.00181456		CGADQGHTGQLYF	144	0.00201554		CAGSQEEYYAEQF	128	0.00161694		CGSSLWYYEQYF	96	0.00122232
CASSLSGQSYEQYF	3287	0.0445529		CASGEGYEQYF	3450	0.0451113		CASSRGLGVSYEQYF	140	0.00199929		CSAEGWGYLHF	139	0.0022419		CRGTENTEVF	137	0.00169177		CASGDATGGASAETLCF	122	0.00188315		CLAGDYAEQF	141	0.00181456		CASSLRDREDEQHF	144	0.00201554		CASSLSWGVQDTLYF	128	0.00161694		CASSGVGGTEQF	96	0.00122232
CASSNRDRTNERLF	3287	0.0445529		CASSDELANYAEQF	3444	0.0450328		CASGQGRDTEAF	139	0.00198501		CGAQGGYNSPLYF	139	0.0022419		CASFGGADTQYF	137	0.00169177		CGDRGPNTEVF	122	0.00188315		CASGAAGRNQDTQYF	140	0.00180169		CSASSYNSPLYF	143	0.00200155		CAGSDGGNYAEQF	127	0.00160431		CTGSADEGSYNSPLYF	96	0.00122232
CASGDPLQDTQYF	3279	0.0444445		CASSDAWGRNSDYTF	3438	0.0449544		CSADIDTEVF	139	0.00198501		CASSSDKTYEQYF	139	0.0022419		CASSQDGGVQDAQYF	137	0.00169177		CDSSDVGYEQYF	121	0.00186772		CSGGTKDTLYF	140	0.00180169		CASGGQGAEVF	143	0.00200155		CSAPHWAQDTQYF	127	0.00160431		CSARNQVPLF	96	0.00122232
CASSLRGSQNTLYF	3279	0.0444445		CASSGDTYEQYF	3429	0.0448367		CSADPEALYF	139	0.00198501		CASSDAGDSPIYF	138	0.00222577		CASGDRPDYTF	137	0.00169177		CVSGDAGRPNERLF	121	0.00186772		CASGGSSYEQYF	140	0.00180169		CASSEGQASTGQLYF	142	0.00198755		CASSLEDADTEVF	127	0.00160431		CVSRQHYAEQF	95	0.00120959
CASRGRIYAEQF	3272	0.0443496		CASSFGMGGVNQDTQYF	3425	0.0447844		CSAGASQGTQYF	138	0.00197073		CTRSAVNQDTQYF	138	0.00222577		CSGRGARATEVF	136	0.00167942		CASSRDRGQDTQYF	121	0.00186772		CGAYRGPNSDYTF	139	0.00178882		CTYRPGQNYAEQF	142	0.00198755		CSAPGGRDTGQLYF	127	0.00160431		CASGDETGRVF	95	0.00120959
CASGPGQHDQAPLF	3263	0.0442276		CASGEGGANTEVF	3422	0.0447452		CSAGLGRQNTLYF	138	0.00197073		CASSYGAETLYF	138	0.00222577		CSADRGRNTLYF	136	0.00167942		CAGGDDEQYF	121	0.00186772		CASSQG_DTGQLYF	139	0.00178882		CSTEWGQAPLF	142	0.00198755		CASSDVDGYEQYF	127	0.00160431		CRAGVNTLYF	95	0.00120959
CASSLGEQYF	3263	0.0442276		CASSFEQYEQYF	3416	0.0446667		CSAGDTEAF	137	0.00195645		CAWKGQGGSDYTF	138	0.00222577		CASSRDYAEQLF	136	0.00167942		CAGSQGTGSQNTLYF	121	0.00186772		CASSPGDWGEQ_F	139	0.00178882		CAWSLGTGDDTQCF	141	0.00197355		CASSPAGAGTLYF	126	0.00159167		CASGHPGTEVF	94	0.00119685
CASGPDRGANSDYTF	3262	0.0442141		CASGDRGRNSPLYF	3412	0.0446144		CSADLGGQDTQYF	137	0.00195645		CSADAQGFNERLF	137	0.00220964		CASSLVGTDAEVF	135	0.00166707		CSADRANTEVLF	120	0.00185228		CASSYLGENTLYF	139	0.00178882		CASSTIPNSDYTF	141	0.00197355		CASSRGGLQDTQYF	126	0.00159167		CASSQGGGRSHEQYF	94	0.00119685
CASSSTDSGNTLYF	3261	0.0442005		CASSFKGDEQYF	3412	0.0446144		CSADGLGGYAEQLF	137	0.00195645		CASSLWDNYAEQF	136	0.00219351		CTRSADRNTEVF	135	0.00166707		CSANDNPSF	120	0.00185228		CASSPWDWGEQYF	138	0.00177595		CASSHLGQGSNERLF	141	0.00197355		CSAGANTEVLF	126	0.00159167		CASGGISYEQYF	94	0.00119685
CASGGTGGVSAETLYF	3261	0.0442005		CAWSLGGVLSGNTLYF	3408	0.0445621		CTRSAAGGDTEVF	136	0.00194217		CSADANNERLVF	132	0.002129		CSVEQGNSAETLYF	135	0.00166707		CGRDINSDYTF	119	0.00183684		CASSPDSSYERYF	138	0.00177595		CANSGGQGANSPLYF	140	0.00195956		CGADSSGNTLYF	126	0.00159167		CASSRTINQDTQCF	94	0.00119685
CASGDLWGRNTLYF	3251	0.044065		CSADNSGNTLYF	3406	0.0445359		CGATKDTQYF	136	0.00194217		CAWSLGGSNERLF	132	0.002129		CSAGIGVNQAPLF	135	0.00166707		CSALGVQDTRYF	119	0.00183684		CSATGDSVETLYF	138	0.00177595		CASSLTGVISNEGLF	140	0.00195956		CASGGGANTEVF	126	0.00159167		CANGDTNSDYTF	94	0.00119685
CASGGWENTLYF	3247	0.0440108		CASSFGEQYF	3405	0.0445229		CGAPGQPLSNERLF	136	0.00194217		CASSLGLGDYQDTQYF	131	0.00211287		CQGTESTEVF	135	0.00166707		CSAGQNNSPLHF	119	0.00183684		CRGTANTEVF	138	0.00177595		CSAERYSSPLYF	140	0.00195956		CASGDAGTGDAEQF	126	0.00159167		CASSQDTGGYTEQF	93	0.00118412
CASSDVQGSNSPLYF	3240	0.0439159		CASSQDGGRGVF	3400	0.0444575		CASGQGRDAEVF	135	0.00192789		CASSLVGYEQYF	131	0.00211287		CSDARGPSAETLYF	135	0.00166707		CASSYRGRVDTLYF	118	0.00182141		CSADYSSYNSPLYF	137	0.00176308		CTIEIQSSKLTDSAVYFWASSQSRDHYAEQF	140	0.00195956		CASSDGWGGEEQYF	125	0.00157904		CSGTGRTSAKTLYF	93	0.00118412
CASSEPPGGQDTQYF	3234	0.0438345		CASSQTGNYAEQF	3392	0.0443529		CSAGNQDAQYF	135	0.00192789		CASGEDNANPDYTF	130	0.00209674		CASSDRDQGTQYF	135	0.00166707		CASGDAAGGASAETLYF	118	0.00182141		CSGTANTEVIF	137	0.00176308		CASGEGQANTGQLYF	140	0.00195956		CASSLEGQQDTPYF	125	0.00157904		CTSSAGQGANTGQLYF	93	0.00118412
CASSEDWGGAWDTQYF	3229	0.0437668		CAAGTGVAEQF	3383	0.0442352		CSAGASRDTQYF	135	0.00192789		CSADRAGGAETLHF	129	0.00208061		CSAEGATEAF	135	0.00166707		CASGPGLGGYEQYF	118	0.00182141		CASRGSPYEQYF	137	0.00176308		CSADQGAETLCF	140	0.00195956		CSAERQGTGQPYF	125	0.00157904		CASTGLGGTEQF	93	0.00118412
CASGDAGVASDYTF	3222	0.0436719		CASRNRSSYEQYF	3368	0.0440391		CANGETGGSTEVF	135	0.00192789		CSADDNNERLF	129	0.00208061		CGSSLKTNSNTEVF	135	0.00166707		CSAPGGSAETLYF	118	0.00182141		CTYSGTANTEVF	137	0.00176308		CSPGQFSNERLF	140	0.00195956		CASSPDRDGSTLYF	125	0.00157904		CVSSQDTGGYAEQF	92	0.00117139
CASSLPGSAETLYF	3220	0.0436448		CASGEPGLGEDTQYF	3367	0.044026		CSADINTEVLF	134	0.0019136		CASTGTGGTEVF	128	0.00206448		CSAVDRGLDAQYF	135	0.00166707		CASKTPSGNTLYF	117	0.00180597		CSAGVPEVLF	136	0.00175021		CSAAGTRVAEQF	140	0.00195956		CASGDARNTGQF	124	0.00156641		CASGDRGAENTEVF	92	0.00117139
CASTGNTEVF	3216	0.0435906		CASSDEGLGGETLYF	3364	0.0439868		CSADLGDRDTQYF	134	0.0019136		CASSGAGYTEVF	128	0.00206448		CSADGANTGVF	134	0.00165472		CSAPGTDANTEVLF	117	0.00180597		CSAGVPEAF	136	0.00175021		CASSGINQDT_YF	140	0.00195956		CASSDTNSGYTF	124	0.00156641		CASSQDTGGEVF	92	0.00117139
CASSSRRGNYAEQF	3215	0.043577		CASSLSPGNTEVF	3362	0.0439606		CSTDQGRQNTLYF	133	0.00189932		CASSDAGDEQYF	128	0.00206448		CTRSADTYEQYF	134	0.00165472		CSAPGLGASAEALYF	117	0.00180597		CSAYREGEVF	136	0.00175021		CASSLTGVISSERLF	140	0.00195956		CSAERQGIGQLYF	124	0.00156641		CASS_DRISNERLF	92	0.00117139
CASSSVYEQYF	3207	0.0434686		CASSLSGANTEVF	3354	0.043856		CTRSADINTEVF	133	0.00189932		CASSFGGGASAETLYF	127	0.00204835		CASGDRAGYTF	134	0.00165472		CSDGGPNTEVF	117	0.00180597		CSAVSQNTLCF	135	0.00173734		CRGTPHEQYF	139	0.00194556		CASSLEDSQNTSYF	124	0.00156641		CSARLGGLSAETLYF	92	0.00117139
CASRPGTNYEQYF	3205	0.0434415		CASSQDSDSYNSPLYF	3351	0.0438168		CSARLGTSQNTSYF	133	0.00189932		CASSGDKTYEQYF	127	0.00204835		CTRSAGGQGYEQYF	134	0.00165472		CSDRGPSTEVF	116	0.00179054		CASSGRDTHAEQF	135	0.00173734		CAGSDWDKEVF	139	0.00194556		CASRRTGRSDYTF	124	0.00156641		CASSQLDTQYF	92	0.00117139
CASRHRGRGGAETLYF	3204	0.0434279		CSADDRRGYNNQAPLF	3329	0.0435291		CSAEGGGNTLYF	133	0.00189932		CASSPDKTYE_YF	127	0.00204835		CSADQSGGGTRYF	134	0.00165472		CSAPGTDANTGVF	116	0.00179054		CVSSQGQQATQYF	135	0.00173734		CASSHRDRATGQLYF	139	0.00194556		CASRGQSQSTLYF	123	0.00155378		CASSGLG-TEQF	92	0.00117139
CASGGTGGDTGQLYF	3190	0.0432382		CASSPGTGGAEQF	3327	0.043503		CSADPETPYF	133	0.00189932		CASSLQYAE_F	126	0.00203222		CSADGANTEVSF	133	0.00164237		CASSSGQYAEQF	116	0.00179054		CASRGLGGGEQYF	135	0.00173734		CASSHPGRGSNERLF	139	0.00194556		CGAGDWGDTQYF	123	0.00155378		CATSGLGGTEQF	91	0.00115866
CASGDGTGGYAEQF	3187	0.0431975		CASGAPGPNTEVF	3322	0.0434376		CSAVRDSNTGQF	133	0.00189932		CASSRQSNPDYTF	126	0.00203222		CRVSGGVTEVLF	133	0.00164237		CVSSQDRGTQDTQYF	116	0.00179054		CTRSAGVPEVF	135	0.00173734		CASSQDRLGGSRNTLYF	139	0.00194556		CSAPHWGLDTQYF	123	0.00155378		CASSQQGAYNSPLCF	91	0.00115866
CASSQEGRGTNERLF	3185	0.0431704		CAWSARVANERLF	3300	0.0431499		CASGDHWVNQDTQYF	132	0.00188504		CASSDAEDIYNSPLYF	126	0.00203222		CSARDSDYAEQF	133	0.00164237		CSAGQDNSPLYF	116	0.00179054		CASSGDTQARHF	134	0.00172448		CASSESGGGQNTLHF	139	0.00194556		CTRSAPGGANTGQLYF	123	0.00155378		CSGRNQAPLF	91	0.00115866
CASSDPDNYAEQF	3178	0.0430755		CASSQTGGLSNERLF	3286	0.0429669		CSADPADNSPLYF	132	0.00188504		CASRTGVEQYF	126	0.00203222		CASSLNRANTEVF	133	0.00164237		CASSDRPNSGYTF	115	0.0017751		CNADRATEVF	134	0.00172448		CVSSTRSQNTLYF	139	0.00194556		CASSDAGTGDAEQSF	123	0.00155378		CASSQDTGGYAERF	91	0.00115866
CASSGQDTQYF	3175	0.0430348		CASSLARGSAETLYF	3278	0.0428623		CTRSAGDTEVF	131	0.00187076		CASSGTGCTEVF	126	0.00203222		CAGSDRDQDTQYF	133	0.00164237		CASSGTVANTEVF	115	0.0017751		CSAEGANQDTQCF	134	0.00172448		CAGSPGQNNSPLYF	139	0.00194556		CASNPYWGNYAEQF	123	0.00155378		CANGGRQSQNTLYF	91	0.00115866
CASSRAGGAGYEQYF	3172	0.0429942		CASSRQNTGQLYF	3276	0.0428361		CASRQANTGQPYF	130	0.00185648		CASSDAGDAPLYF	125	0.0020161		CTRRGPDYTF	133	0.00164237		CSASGGGAETLYF	115	0.0017751		CSAAGGAGSSPLYF	134	0.00172448		CVSSLRDREDEQYF	138	0.00193156		CGADPGHNTLYF	122	0.00154115		CASGHRAGAETLYF	91	0.00115866
CASSPTGGPSAETLYF	3166	0.0429129		CASGVPGTGGDERLF	3270	0.0427576		CASSGVGYEQYF	130	0.00185648		CASSQDLSYNSQAPLF	125	0.0020161		CSAEGATEVLF	133	0.00164237		CASSDVGGNYAEQF	114	0.00175967		CASSQDRGDQDTQCF	133	0.00171161		CRLGGETLHF	138	0.00193156		CASSLSRTEQF	122	0.00154115		CRASRGQNTLYF	91	0.00115866
CAWSLGAYNSPLYF	3160	0.0428315		CASSLYEQYF	3268	0.0427315		CSAGGGDTEVSF	130	0.00185648		CSADRAGSAETLYF	125	0.0020161		CASRQAYNSPPYF	132	0.00163003		CTYSARTGNERLF	114	0.00175967		CASGAAGGN_DTQYF	133	0.00171161		CASSQDRLGGGQNTLYF	138	0.00193156		CSAVGTNPDYTF	121	0.00152851		CSGQNQNTQYF	91	0.00115866
CASGGTGGARNEQYF	3157	0.0427909		CASSQKRGGRDQDTQYF	3267	0.0427184		CSAHQLAYEQYF	130	0.00185648		CSADRAGGAGTLYF	124	0.00199997		CASSDARGPSAEALYF	132	0.00163003		CTRSADWGADTGQLYF	114	0.00175967		CASSQDGSPYAGQF	132	0.00169874		CAGSQDRLGGSQNTLYF	138	0.00193156		CSTRGGDTQYF	121	0.00152851		CSLPGVNQAPLF	91	0.00115866
CASSGSQNTLYF	3155	0.0427638		CASSSGTGGNTLYF	3266	0.0427053		CSGDRISNEGLF	130	0.00185648		CASSRDLSYNNQAPLF	124	0.00199997		CASSRKTNSNTEVF	132	0.00163003		CSAATGGFSNEK_SF	113	0.00174423		CAGSPDSSYEQYF	132	0.00169874		CASSLRDWGTSAETLCF	138	0.00193156		CSAPGGRNAGQLYF	121	0.00152851		CSARKQAPLF	90	0.00114592
CASSGTGGSSYEQYF	3153	0.0427367		CASSDAGSSYEQYF	3252	0.0425223		CSAAQGTTEVF	130	0.00185648		CSAVGQGAGNALYF	123	0.00198384		CASGPGTGGYEQYF	132	0.00163003		CSAERGQGTAEVF	113	0.00174423		CASSPGDWGVQYF	132	0.00169874		CASGTLGGRGEQYF	137	0.00191757		CTSSPAGAETLYF	121	0.00152851		CASSLWY_EQYF	90	0.00114592
CASSDAGGQAPLF	3151	0.0427095		CASSSGTSERLF	3241	0.0423784		CTRSADGLGGYAEQF	130	0.00185648		CASSDAWDSPLYF	123	0.00198384		CASSLDRANTEIF	132	0.00163003		CASRAANSDYTF	113	0.00174423		CSVDRANTGQLYF	132	0.00169874		CSADFGRNTGQLHF	137	0.00191757		CVSSPAGAETLYF	120	0.00151588		CASRGIPYEQYF	90	0.00114592
CASSLSGNTEVF	3150	0.042696		CASSLAGRSYEQYF	3236	0.0423131		CSANRADEQHF	129	0.0018422		CASGEGTGGYERYF	123	0.00198384		CSAGDSQNALYF	132	0.00163003		CASSAGTFTEVF	113	0.00174423		CASGQGTGAETLYF	132	0.00169874		CAGSHPGQGSNERLF	137	0.00191757		CASSQGQGQVLF	120	0.00151588		CASSHPGAEVF	90	0.00114592
CASSPTGGTGASQNTLYF	3147	0.0426553		CASSDEDTSYNSPLYF	3233	0.0422738		CAGSDVGYEQYF	129	0.0018422		CASRSTGGYNYAEQLF	123	0.00198384		CSAAANTGQLYF	132	0.00163003		CSAGPDTEVLF	113	0.00174423		CASSMGRYEQYF	131	0.00168587		CSADQGHTGRLYF	137	0.00191757		CASSDMDGYERYF	120	0.00151588		CSADEGSYN_PLYF	90	0.00114592
CASSSNNQAPLF	3146	0.0426418		CASSLGTGYEQYF	3228	0.0422085		CSAGDAEVF	129	0.0018422		CASSGTGYTEVLF	123	0.00198384		CSAAGGAYEQYF	132	0.00163003		CSTRTGNERLF	112	0.00172879		CASRGQSYAEQF	131	0.00168587		CASSGQGAEVSF	137	0.00191757		CASGADRVNYAERF	120	0.00151588		CSAPWGQNTLYF	90	0.00114592
CASSEGQNNQAPLF	3145	0.0426282		CASSFRGGAETLYF	3221	0.0421169		CTRSARLGTSQNTLYF	128	0.00182792		CAGSGTGYTEVF	122	0.00196771		CGADRGAAPLF	132	0.00163003		CSADRGGQNTLYF	112	0.00172879		CAGSQDGSPYAEQF	131	0.00168587		CASSRRDWATGQLYF	136	0.00190357		CASSQGPVANTEVSF	120	0.00151588		CSQQGAYNSPLYF	90	0.00114592
CASSLGANTGQLYF	3132	0.042452		CASSFDWDTLYF	3210	0.0419731		CTWSRGLGGREQYF	128	0.00182792		CASGGTGYTEVF	122	0.00196771		CGAEGLGGSQNTLYF	131	0.00161768		CASSWTASQNTLYF	112	0.00172879		CSDRQGNTEVSF	131	0.00168587		CASSALQGRAETLYF	136	0.00190357		CGAGDRGAETLYF	119	0.00150325		CASSPTASNGRLF	90	0.00114592
CASSKQGATNERLF	3129	0.0424114		CASSQDRYNSPLYF	3194	0.0417639		CSAVRDSNIGQLYF	128	0.00182792		CSADAMYLCASSREGNERLF	122	0.00196771		CSTDQEAPLF	131	0.00161768		CASGDPGRGAEVF	112	0.00172879		CSADYNSYSSPLYF	131	0.00168587		CASSTTPNSDYIF	136	0.00190357		CGAPGGRNTGQLYF	119	0.00150325		CASSQDTGGCAEQF	89	0.00113319
CASSDARAANNQAPLF	3123	0.04233		CSADSQGVF	3191	0.0417247		CGADPTDNSPLYF	127	0.00181364		CARSHRGQNTLYF	121	0.00195158		CAGSLLGQGGEQYF	131	0.00161768		CASSPGQGNAGQLYF	112	0.00172879		CSTRQGANAEVF	131	0.00168587		CVWSLGTGDDTQYF	136	0.00190357		CASS_GQGQVF	119	0.00150325		CASSSPTGGSYEQYF	89	0.00113319
CASSLGTGDTGQLYF	3116	0.0422351		CSGGRSNTEVF	3189	0.0416985		CASGDASNEK_SF	127	0.00181364		CSAQGGYNSPPYF	121	0.00195158		CSGDNNQNTLYF	131	0.00161768		CSGTGGPSAETPYF	112	0.00172879		CTSSLRGDTEVF	131	0.00168587		CASSGQDNYAEQF	136	0.00190357		CSETVYNERLF	119	0.00150325		CASSQQRAYNSPLYF	89	0.00113319
CASSDAELGGYAEQF	3109	0.0421403		CAWSTGSGNTLYF	3163	0.0413585		CSDPGGADQDAQYF	127	0.00181364		CASGDAEGGSAETLYF	120	0.00193545		CTRSATGGAYEQYF	130	0.00160533		CASRIRGPSNERLF	112	0.00172879		CSAGRDVSYNSPLYF	131	0.00168587		CSETVSNERLF	136	0.00190357		CARSLEGQQDTQYF	119	0.00150325		CASSRPGTEVF	89	0.00113319
CASSRHHNNQAPLF	3107	0.0421132		CASSGQSSYNSPLYF	3159	0.0413062		CASSQGGGDTEVF	127	0.00181364		CASTLDKSYEQYF	120	0.00193545		CRPGLGDAEQF	130	0.00160533		CTRSADRDWGAWLAEQF	112	0.00172879		CSAPGADAVQF	131	0.00168587		CSAAGTGVTEQF	136	0.00190357		CSAERQGTRQLYF	119	0.00150325		CASSGTANSDYTF	89	0.00113319
CASSLRTGYNSPLYF	3104	0.0420725		CASSRQGPNSDYTF	3156	0.041267		CSAAGGDTEAF	126	0.00179936		CSGVAEQLF	120	0.00193545		CASSVAGEEVF	130	0.00160533		CASSDVGSEQYF	111	0.00171336		CSGGTENTLYF	131	0.00168587		CAGSPVAEQF	136	0.00190357		CSADSSGNTPYF	119	0.00150325		CASSHIWRYEQYF	88	0.00112046
CASGDGVKNSYNSPLYF	3104	0.0420725		CASRPGHNNQAPLF	3151	0.0412016		CTRSANRADEQYF	126	0.00179936		CASGGSGTLNQDTQYF	120	0.00193545		CAWSLTGGPYAEQF	130	0.00160533		CSADRDNYAEQLF	111	0.00171336		CSDRQGNTGVF	131	0.00168587		CSAERYDSPLYF	136	0.00190357		CASRTLNQGTQYF	119	0.00150325		CASSQEGVGGRRSAETLCF	88	0.00112046
CASGDAGVDTEVF	3103	0.0420589		CASSSGTGGDTQYF	3138	0.0410316		CTYSAEGGGPSAETLYF	126	0.00179936		CASSRRSNSDYTF	119	0.00191932		CASSPTGSDTEVF	130	0.00160533		CASSQRGYNYAEQF	111	0.00171336		CSAEALNRDTQYF	131	0.00168587		CRGTPYEQHF	135	0.00188957		CVSSLRGRGTEVF	119	0.00150325		CSGQNPDTQYF	88	0.00112046
CASSQEGEDTQYF	3102	0.0420454		CASSPPGQPNTEVF	3133	0.0409663		CTRSAGTGTGQLYF	126	0.00179936		CASSQETGGSTGQLYF	119	0.00191932		CTRMALSNERLF	129	0.00159298		CGAGGASAETLYF	111	0.00171336		CSADVGGLYAERF	131	0.00168587		CASRTGNERLF	134	0.00187558		CAGSLGHSGNTLYF	119	0.00150325		CASSLVGGALERYF	88	0.00112046
CASGVGHISNERLF	3093	0.0419234		CASSLGQGGSNERLF	3121	0.0408094		CSAAQGRQNTLYF	126	0.00179936		CGADQDWGGWQNTLYF	119	0.00191932		CASGGGQGNYAKQF	129	0.00159298		CASSDRPNPDYTF	111	0.00171336		CASSPGEWGEQYF	130	0.001673		CASSGIN_DTQYF	134	0.00187558		CASGDARNTEQLYF	119	0.00150325		CASS_QGAYNSPLYF	88	0.00112046
CASSEEGAEQYF	3093	0.0419234		CASSWTGGALTEQF	3108	0.0406394		CSADMNTEVF	125	0.00178508		CASSLGTGGGNTLYF	119	0.00191932		CASSQRQTNSDYTF	129	0.00159298		CASSQEGDGNTLCF	111	0.00171336		CASGQDRGSSYEQYF	130	0.001673		CASSHRGWATGQLYF	134	0.00187558		CASSLGHSGDTLYF	119	0.00150325		CARSQDGTANSDYTF	88	0.00112046
CASSDMDRGGEQYF	3092	0.0419098		CASSGDREGTQYF	3102	0.0405609		CAGGQGRDTEVF	125	0.00178508		CTRSAEGGEVF	119	0.00191932		CA_SLTGGVYAEQF	129	0.00159298		CASSDRPNSNYTF	111	0.00171336		CASSPDSSYEQHF	130	0.001673		CSSRGLF	134	0.00187558		CASSLEGPQDTQYF	118	0.00149062		CASSQDGTATSDYTF	88	0.00112046
CASGGGLGSYNYAEQF	3088	0.0418556		CASGDAPGGSEQYF	3094	0.0404563		CAGSPDWGNAEQF	125	0.00178508		CSADTQGFDERLF	119	0.00191932		CSVGQNAGQLYF	129	0.00159298		CSAPGVQDTQYF	111	0.00171336		CSAPSADAEQF	129	0.00166013		CSPRQLSNERLF	134	0.00187558		CASSLEGQQDSQYF	118	0.00149062		CRARLGGPSAETLYF	88	0.00112046
CASSSGGPDTQYF	3087	0.0418421		CSADWGGANERLF	3092	0.0404302		CVSSDAQKDTEVF	124	0.0017708		CASSLQYAERF	119	0.00191932		CSARGTEVLF	129	0.00159298		CASSQDRQNTLYF	110	0.00169792		CSGGTKNTLCF	129	0.00166013		CSSRRLFSNERLF	134	0.00187558		CTYSAGTGNTEVF	118	0.00149062		CASSGMGGTEQF	87	0.00110773
CASSDGGSSYEQYF	3086	0.0418285		CASSMKGQANTEVF	3082	0.0402994		CSAGGLGGYAEQF	124	0.0017708		CAGSQDLSYNNQAPLF	118	0.00190319		CAGSLVGTDTEVF	129	0.00159298		CASSLGLPGLGGYEQYF	110	0.00169792		CSASRTGAEQF	129	0.00166013		CSANSCNSPLYF	133	0.00186158		CASSLDWGGLSQNTLYF	118	0.00149062		CTSRGISYEQYF	87	0.00110773
CASSELRDWGDEQYF	3082	0.0417743		CASRAGTGSNERLF	3077	0.040234		CGAAGGDTEVF	124	0.0017708		CASSRDKSYEQYF	117	0.00188707		CSSTAAFSSERLF	129	0.00159298		CASSRETGRQDTQYF	110	0.00169792		CSADSGGNHAEQF	129	0.00166013		CASSPVAELF	133	0.00186158		CASSQGRGQVF	118	0.00149062		CASGDETGGYAEQF	87	0.00110773
CASSGTGDSYEQYF	3076	0.041693		CASSPKANTGQLYF	3069	0.0401294		CSARDWGYEQYF	124	0.0017708		CANSRLGSAETLYF	117	0.00188707		CASSLKTNSNTDVF	129	0.00159298		CAISDVGYEQYF	110	0.00169792		CSATVNTGVF	129	0.00166013		CTRSAELNERLF	133	0.00186158		CARSPGQGAYEQYF	118	0.00149062		CASRGTSYEQYF	87	0.00110773
CASSRTGDNQAPLF	3075	0.0416794		CASSLRDSQNTLYF	3061	0.0400248		CGAGREVF	124	0.0017708		CARKYGGAETLYF	116	0.00187094		CASGQGGREQYF	129	0.00159298		CASSDDRTSGNTLYF	109	0.00168249		CASSLPGRDNQARHF	129	0.00166013		CSSRELFSNERLF	132	0.00184758		CASSLLGQGCAEQF	118	0.00149062		CSGTGRTSAETL_F	87	0.00110773
CASSSGQNTLYF	3073	0.0416523		CASSDGTGGYEQYF	3057	0.0399725		CSAWDGSYEQYF	123	0.00175652		CASSRGKTYEQYF	116	0.00187094		CASSQDKTGATEVF	128	0.00158063		CSAGPDAEVF	109	0.00168249		CASNQGQDTGQLYF	129	0.00166013		CASSLRDWETSAETLYF	132	0.00184758		CASSPVGAETLYF	118	0.00149062		CSGTGRTSAVTLYF	87	0.00110773
CAWSLARATEVF	3073	0.0416523		CASSLDRNQDTQYF	3052	0.0399071		CSADRGGYGQYF	123	0.00175652		CASSLWGEDTQYF	115	0.00185481		CTRSAVGDQDTQYF	128	0.00158063		CSARDAQYF	108	0.00166705		CAWGRAGANSGNTLYF	128	0.00164726		CTWSLGTGRDEQYF	132	0.00184758		CGADWGAYEQYF	117	0.00147798		CASSGLGGTGQF	87	0.00110773
CASSDNNERLF	3072	0.0416388		CASSDTRKNTLYF	3052	0.0399071		CAGSPRDNYAEQF	123	0.00175652		CASSDAGQGAGNTLCF	114	0.00183868		CSAEGGGERYF	127	0.00156828		CASRVRGLSNERLF	108	0.00166705		CASSPRGDTGQPYF	128	0.00164726		CASSQSGTQGEYF	132	0.00184758		CASSQDSYTQYF	117	0.00147798		CASNQGGGRSYEQYF	86	0.00109499
CASGDGGYEQYF	3072	0.0416388		CASSETEGDTQYF	3048	0.0398548		CSAAGGSTEVF	122	0.00174224		CSADRLGVGQNTLYF	114	0.00183868		CSVGHNNYAEQF	127	0.00156828		CASSETGGYEQYF	108	0.00166705		CGAGGDSPLYF	128	0.00164726		CASGQDRLGGSQNTLYF	132	0.00184758		CASSLSQTGQF	117	0.00147798		CSASRG_NTLYF	86	0.00109499
CASSLEENTLYF	3066	0.0415574		CASSHRQMDSDYTF	3046	0.0398287		CASGEIGGSTEVF	122	0.00174224		CASSSGTANSDYAF	113	0.00182255		CASSRGYAEQF	127	0.00156828		CTRSALGDNYAEQF	108	0.00166705		CASSPGDWGEQSF	128	0.00164726		CASSQDRLGGSQDTLYF	132	0.00184758		CGAPGGANTGQLYF	117	0.00147798		CSARLGGPRAETLYF	86	0.00109499
CASSEVEVF	3060	0.0414761		CASILRGDGAETLYF	3045	0.0398156		CSVDRDSYNSPLYF	122	0.00174224		CASSLDWGVEDTQYF	113	0.00182255		CTRSADGANTEVF	126	0.00155593		CSETGGQDTRYF	107	0.00165162		CASSRDWGAPNTGQLYF	128	0.00164726		CAGSHLRGAYTEVF	131	0.00183358		CASSSAGAETLYF	117	0.00147798		CASGDEIGGVF	86	0.00109499
CASSLPGRVYEQYF	3058	0.041449		CASSPRLGGLEQYF	3042	0.0397764		CSVGGGQDTQYF	121	0.00172796		CASSLSHLSNERLF	113	0.00182255		CAGGGQPYEQYF	126	0.00155593		CASSDRPDSDYTF	106	0.00163618		CSARGGSSEALYF	127	0.00163439		CSGTGPQDTQYF	131	0.00183358		CASSQEEYYAEQLF	117	0.00147798		CANSQQGAYNSPLYF	86	0.00109499
CASGGGFNQDTQYF	3058	0.041449		CASGDPSAETLYF	3038	0.0397241		CSADPTKTSQNTSYF	121	0.00172796		CSAEPISNERLSF	113	0.00182255		CSADRSTEVF	126	0.00155593		CASGGAGTGQLYF	106	0.00163618		CSAGREENSPLYF	127	0.00163439		CASSQSRDPYAEQF	131	0.00183358		CASGHYGQYF	117	0.00147798		CPSSLWYYEQYF	86	0.00109499
CASGGSSYEQYF	3058	0.041449		CASSDAAGGNYAEQF	3036	0.0396979		CSADINAEVF	121	0.00172796		CTSSPWDWGYAEQF	112	0.00180642		CTRSASQSNYAEQF	126	0.00155593		CASSDVGYEQDF	106	0.00163618		CSADARDTLCF	127	0.00163439		CSAERYNPPLYF	130	0.00181959		CSAGWGGAAETLYF	117	0.00147798		CASGGPQESNTEVF	86	0.00109499
CASGGQGDERLF	3053	0.0413812		CANSLEGGSQNTLYF	3032	0.0396456		CSAGDRLYGNTLYF	121	0.00172796		CASGEDSLSGNTLYF	112	0.00180642		CASGDEAGGYAEQLF	126	0.00155593		CTRSASGGSAETLYF	106	0.00163618		CASSLPGRDTQAQHF	127	0.00163439		CSVVAGGHERLF	130	0.00181959		CASSLGDSQNTLYF	117	0.00147798		CASSQDTGGHAEQF	86	0.00109499
CASSDTQGAEQYF	3052	0.0413677		CASEGYEQYF	3027	0.0395802		CSADNLGQGTQYF	121	0.00172796		CASSQDLSYNDQAPLF	112	0.00180642		CASSGGQGNYAEQF	125	0.00154359		CSAAPNAEVF	106	0.00163618		CSARGGSSETPYF	127	0.00163439		CRGTPYAQYF	130	0.00181959		CASGDGANTEVLF	117	0.00147798		CNARLGGPSAETLYF	86	0.00109499
CASGDAGGVYEQYF	3051	0.0413541		CASSEGASNERLF	3018	0.0394626		CASSDAQKDTKVF	120	0.00171368		CASSWTGGHQDAQYF	112	0.00180642		CASSKDWSSYEQYF	125	0.00154359		CSAGQNNSPLCF	105	0.00162075		CSADRANTRQLYF	126	0.00162152		CASSQDWTGVDTQYF	130	0.00181959		CASSHPGLGSYEQYF	116	0.00146535		CASGGRQSQNTF	86	0.00109499
CASGDRNTEVF	3038	0.0411779		CSARDGNTEVF	3008	0.0393318		CSAEGEKSQNALYF	120	0.00171368		CSADRRNTEVF	111	0.00179029		CSAVGGNQAPLF	125	0.00154359		CASRTANPDYTF	105	0.00162075		CSADGTEQF	126	0.00162152		CASSMTPNSDYTF	130	0.00181959		CASSPSNTEAF	116	0.00146535		CASSQEGVGGRRSAEMLYF	86	0.00109499
CASSSSTINTGQLYF	3035	0.0411372		CASSSPFSNERLF	2997	0.039188		CASSDNQGTYEQCF	120	0.00171368		CASRSTGGYNYAERF	111	0.00179029		CASSLKTGVTEVF	125	0.00154359		CTRSADAENTLYF	105	0.00162075		CASRPLGGYAERF	126	0.00162152		CTSSQSGDNNQDTQYF	129	0.00180559		CTCSAPHWGQDTQYF	116	0.00146535		CASRGISYERYF	85	0.00108226
CASSDSVYAEQF	3033	0.0411101		CASSATGEDNQAPLF	2981	0.0389788		CSAEGGGTEVF	120	0.00171368		CSADRLGVSQNALYF	111	0.00179029		CTRQGTENTEVF	125	0.00154359		CASSDRPNSDCTF	105	0.00162075		CASRPLGGCAEQF	126	0.00162152		CASSWGRVYEQYF	129	0.00180559		CSAPHWGQDTKYF	116	0.00146535		CSADEASYNSPLYF	85	0.00108226
CASSGPGREAETLYF	3031	0.041083		CASSWGQPNTEVF	2980	0.0389657		CSANRADERYF	120	0.00171368		CSTDGRNTEVF	109	0.00175804		CASGDRTDYTF	125	0.00154359		CSADRDNYAGQF	105	0.00162075		CASGAAGENQDTQYF	126	0.00162152		CGAGTVYAEQF	129	0.00180559		CAGSLDRGANTGQLYF	116	0.00146535		CASSQDGIANSDYTF	85	0.00108226
CASGDATGVNTGQLYF	3026	0.0410153		CASSGQSGGWAETLYF	2969	0.0388219		CASSQDGGDAEVF	119	0.0016994		CSGVAGQF	109	0.00175804		CSASRDPGGDTRYF	125	0.00154359		CASSQQDNYAEQF	105	0.00162075		CASGAAGGNQDT_YF	126	0.00162152		CASSQESGAETLYF	129	0.00180559		CASSQGGTGCLAPSAGHCTCSETVSNERLF	116	0.00146535		CASSQEGMGGRRSAETLYF	85	0.00108226
CASSQDRANSPLYF	3021	0.0409475		CASSPDRDHQAPLF	2968	0.0388088		CSAGRAEQLF	119	0.0016994		CASSPDKTYEPYF	109	0.00175804		CSVGSSAEALYF	124	0.00153124		CSAVRDSQNTSYF	105	0.00162075		CSATGDSAGTLYF	126	0.00162152		CASNTRSQNTLYF	128	0.00179159		CASSGGGNYAEQF	116	0.00146535		CTCSASRGQNTLYF	85	0.00108226
CASGDAGWGFNQDTQYF	3012	0.0408255		CASSQTGGTEVF	2956	0.0386519		CASGDVSNERLF	119	0.0016994		CARSPDKTYEQYF	108	0.00174191		CSAGQRNSPPYF	124	0.00153124		CSAGTNTEVSF	104	0.00160531		CTCSAEALNQDTQYF	125	0.00160865		CASSGQGTEVF	128	0.00179159		CGAAQGHSGNTLYF	116	0.00146535		CASSRTVNQDTQYF	85	0.00108226
CASSPDRGANERLF	3010	0.0407984		CASSPGTDSNERLF	2956	0.0386519		CASSQATNYAEQSF	118	0.00168511		CALPSGTGGNQDTQYF	108	0.00174191		CSASRDSGGDTQYF	124	0.00153124		CASSLGDIFSNEGLF	103	0.00158987		CSADSGGNYAERF	125	0.00160865		CASSHTTNSDYAF	128	0.00179159		CAGSLSQTEQF	116	0.00146535		CASSQQGVYNSPLYF	85	0.00108226
CASSSGQNTGQLYF	3010	0.0407984		CASSRQGSAETLYF	2954	0.0386257		CRAVRDSNTGQLYF	118	0.00168511		CASSPDKIYEQYF	108	0.00174191		CSADRNTEVLF	124	0.00153124		CVWSLGGSAETLYF	103	0.00158987		CSVDYNSYNSPLYF	125	0.00160865		CASSIQGDSDYTF	128	0.00179159		CTRSAEGQQAQHF	116	0.00146535		CASSHEGVGGRRSAETLYF	85	0.00108226
CASGDWGAHYAEQF	3004	0.0407171		CSDRGVSNERLF	2941	0.0384557		CSADRDRYNSPLYF	117	0.00167083		CASALDKSYEQYF	107	0.00172578		CSNPTGGPNQDAQYF	124	0.00153124		CSAPGGTSRNTLYF	103	0.00158987		CSALWDRNTEVF	125	0.00160865		CRGTPCEQYF	128	0.00179159		CSARGGDIQYF	116	0.00146535		CASNQQDTQYF	85	0.00108226
CASSDGDSSYEQYF	2996	0.0406086		CAWSPPGDNSPLYF	2941	0.0384557		CAGQTSAETLYF	117	0.00167083		CASSFWGGARQNTLYF	107	0.00172578		CSAPTGGGGAETPYF	124	0.00153124		CAWSLRGSAETLYF	103	0.00158987		CAWSRAGANSGDTLYF	125	0.00160865		CRGPPYEQYF	128	0.00179159		CASRQTGPETLYF	115	0.00145272		CASSRTINRDTQYF	85	0.00108226
CASSRDWGAPETLYF	2993	0.040568		CASSQEGGGPQDTQYF	2941	0.0384557		CSGQVAETLYF	114	0.00162799		CASSRGDTQYF	107	0.00172578		CASSQGTGGNYAEQF	124	0.00153124		CSADRDSQNTLYF	102	0.00157444		CSATGDSAETLHF	125	0.00160865		CASSLRDWGTSVETLYF	128	0.00179159		CASGDGFTLYF	115	0.00145272		CSFPDRGPTGQLYF	85	0.00108226
CASSLSTGPNTGQLYF	2987	0.0404866		CASGDAPGSYEQYF	2941	0.0384557		CSTDRDSYNSPLYF	114	0.00162799		CGAVNQDTQYF	106	0.00170965		CASSQEQGDTEVF	124	0.00153124		CSASGGSAEALYF	102	0.00157444		CASSL_RDTQAQHF	125	0.00160865		CSADPVANTEVF	127	0.0017776		CSAGTGGNSPLYF	115	0.00145272		CASSLCYYEQYF	84	0.00106953
CASSESGGDTEVF	2977	0.0403511		CASSFRVQDTQYF	2929	0.0382988		CSAGAPQDTQYF	113	0.00161371		CASSPDRTETLYF	106	0.00170965		CASSGGGNYAEQSF	124	0.00153124		CASSPGQGSTGQLYF	102	0.00157444		CTSSLPGRDNQAQHF	125	0.00160865		CSAVGDEQHF	127	0.0017776		CSAGASTEVF	115	0.00145272		CSASRGQNTMYF	84	0.00106953
CASSDDEQYF	2967	0.0402156		CASSDAHRSSYEQYF	2925	0.0382465		CSAGTSNTGQLHF	113	0.00161371		CASGLGQLGNTLYF	106	0.00170965		CSADRSGGGTQYF	124	0.00153124		CASRRDRASGNTLYF	101	0.001559		CSGYTSQNTLYF	124	0.00159578		CA_SHWGNYAEQF	127	0.0017776		CASSQGGLQDTRYF	115	0.00145272		CARSQEGVGGRRSAETLYF	84	0.00106953
CASSEAVSNERLF	2957	0.04008		CASSPTGRSQNTLYF	2920	0.0381811		CSADGLGGYAGQF	112	0.00159943		CASSPQGQF	106	0.00170965		CSATGISQAPLF	123	0.00151889		CSDREPNTEVF	101	0.001559		CSATGDGAETLYF	124	0.00159578		CASSRINQDTQYF	127	0.0017776		CTRRTGGQDTQYF	114	0.00144009		CSARLGGPSAKTLYF	84	0.00106953
CASSQDPNSGNTLYF	2950	0.0399851		CASSWTGANTEVF	2890	0.0377889		CSADQGGGYEQYF	112	0.00159943		CASSPWDWSYAEQF	106	0.00170965		CSAPGGYERYF	123	0.00151889		CSAGSQNTLYF	101	0.001559		CSRTANTEVF	124	0.00159578		CSTNSYNSPLYF	127	0.0017776		CSLEIQSSEAGDSALCLCASSLLGQGYAEQF	114	0.00144009		CASSGTGANSDYTF	84	0.00106953
CASGPDNYNNQAPLF	2950	0.0399851		CASSLSEVGTGQLYF	2889	0.0377758		CGADGLGGYAEQF	112	0.00159943		CASSAGTGYERLLF	105	0.00169352		CGFSGTGSYEQYF	123	0.00151889		CTCSARTGNERLF	100	0.00154357		CSASGGYDQAQHF	124	0.00159578		CGAELNERLF	127	0.0017776		CASSRQGPSQNTLCF	114	0.00144009		CASTSQGGDTEVF	84	0.00106953
CASNAVSNERSF	2949	0.0399716		CAWGESQNTLYF	2881	0.0376712		CASSPPGHDERLF	112	0.00159943		CASGERQFSRNTLYF	105	0.00169352		CSATGIDQAPLF	123	0.00151889		CSADPFNSGNTF	100	0.00154357		CSLEIQSSEAGDSALYLRASSGDTQAQHF	124	0.00159578		CASSALQGRDTEVF	127	0.0017776		CASSGTGPNSDYTF	114	0.00144009		CASGGTGVNSDYTF	84	0.00106953
CASGDGGQHTLYF	2949	0.0399716		CASSDAGEGSDYTF	2878	0.037632		CSADWDSYNSPLYF	112	0.00159943		CASSGEGDEQYF	105	0.00169352		CSADRFPYEQYF	123	0.00151889		CTSSYPGQGDTEVF	100	0.00154357		CAGSQDLSQNTLYF	124	0.00159578		CASGQSGTQREYF	127	0.0017776		CASSLRGRGTEGF	114	0.00144009		CASGGPQGSNAEVF	83	0.0010568
CASSFDTQYF	2942	0.0398767		CASSPGLRQDTQYF	2875	0.0375927		CSAD_GRQNTLYF	111	0.00158515		CASSQDLSYNNRAPLF	105	0.00169352		CSSSRNNQDAQYF	123	0.00151889		CASSEGPGGAFYAEQF	99	0.00152813		CSADKATEVF	123	0.00158291		CSADFGRDTGQLYF	127	0.0017776		CSVDWGGAAETLYF	114	0.00144009		CASTPQGSDTEVF	83	0.0010568
CASSPQGSYNSPLYF	2923	0.0396192		CASSDLGYEQYF	2874	0.0375797		CSARGNTEVF	111	0.00158515		CASSLDKSYEPYF	104	0.00167739		CSAVGDSQAPLF	123	0.00151889		CSADPFDSGNTLYF	99	0.00152813		CASRRLGSSAETLYF	123	0.00158291		CAWSHRGNYAEQF	127	0.0017776		CASSPDRVGQYF	113	0.00142745		CAGSPGTGDYNNQAPLF	83	0.0010568
CASRGAETLYF	2922	0.0396056		CASSQGGGAYAEQF	2870	0.0375274		CTRSAGDRFYGNTLYF	111	0.00158515		CASSLPGYTGQLYF	104	0.00167739		CSADRGQSTLYF	123	0.00151889		CASSLGGIFSNERLF	99	0.00152813		CASSQDWGEDTQYF	123	0.00158291		CRPGQNYVEQF	127	0.0017776		CASGDARNTG_LYF	113	0.00142745		CASGDRGTENTEVLF	83	0.0010568
CASSEGQGWTLYF	2919	0.039565		CAWRPPTGDQDTQYF	2866	0.037475		CSANGADEQYF	111	0.00158515		CAGSEGDQDTQYF	104	0.00167739		CASSLGRIYAEQF	123	0.00151889		CSAELSANTEVLF	99	0.00152813		CASSPGTGINGQYF	123	0.00158291		CSGLGGLAEQF	127	0.0017776		CLGDRNYAEQF	112	0.00141482		CSASPGQNTLYF	83	0.0010568
CASSRDRNQDTQYF	2916	0.0395243		CASSPGQNTEVF	2864	0.0374489		CSARDRGDEQYF	110	0.00157087		CASNRGGTQYF	103	0.00166126		CRSQNTLYF	123	0.00151889		CSAGGQKSERLF	98	0.0015127		CTYSGHTSQNTLYF	123	0.00158291		CASARDNYAEQLF	127	0.0017776		CASSLSWGPQNTLYF	112	0.00141482		CSAKLGGPSAETLYF	83	0.0010568
CASSAGQGHQAPLF	2916	0.0395243		CASSDRYEQYF	2862	0.0374227		CSAGQYNSPPYF	110	0.00157087		CTRSADYTEVF	103	0.00166126		CSAVDRGLGTQYF	122	0.00150654		CRRDINPDYTF	98	0.0015127		CASSRGTGAETLYF	123	0.00158291		CTSSLRDREDEQYF	126	0.0017636		CASGLDRGDSGNTLYF	112	0.00141482		CTSSADEGSYNSPLYF	82	0.00104406
CASGDRENSDYTF	2915	0.0395107		CASSPLPDYTF	2856	0.0373443		CASGDARDRSDSDYTF	110	0.00157087		CSGDKSTEVF	102	0.00164513		CASSLSLRGNSGNTLYF	122	0.00150654		CSETGGQDAQYF	98	0.0015127		CASRPLGRDNQAQHF	123	0.00158291		CASSEGQANTGQLHF	126	0.0017636		CASSLRDSYAEQF	112	0.00141482		CASGDPGQGSNTEVF	82	0.00104406
CASSDVGAGSYEQYF	2911	0.0394565		CASSFRGDNQAPLF	2850	0.0372658		CSADGDWGGQNTLYF	110	0.00157087		CASSPWDWGYAKQF	102	0.00164513		CSAGHNNCAEQF	122	0.00150654		CSGLGGPQNTLCF	98	0.0015127		CSAGRDISYSSPLYF	123	0.00158291		CASSLRDWATGQLYF	126	0.0017636		CAGRVSYNSPLYF	112	0.00141482		CAISLWYYEQYF	82	0.00104406
CASWGGAQDTQYF	2909	0.0394294		CASSLPENYAEQF	2850	0.0372658		CASSEGQRNTEVSF	110	0.00157087		CANSDWDRGMQNTLYF	102	0.00164513		CSGNNSQNTLYF	122	0.00150654		CDVGYEQYF	97	0.00149726		CASSQDLASTEVF	122	0.00157004		CASSPVAEQLF	126	0.0017636		CASSQEGWGYEQYF	112	0.00141482		CASRSGQEGAEVF	82	0.00104406
CASGDLASAETLYF	2908	0.0394159		CASGDGVAEQF	2831	0.0370174		CSPGQSNTGVF	110	0.00157087		CASSLSYFSNERLF	101	0.00162901		CASSQDSTGGDTQYF	122	0.00150654		CASGDQGRANEGLF	97	0.00149726		CASSQDPAVGHAEQF	122	0.00157004		CASSQARGAEQLF	126	0.0017636		CAGSTWGPQNTLYF	111	0.00140219		CASGGRQNQNTLYF	82	0.00104406
CASSDGRPFSNERLF	2907	0.0394023		CASSDTSYNSPLYF	2816	0.0368213		CSAVTVVSNERLF	110	0.00157087		CASSDAGDSHLYF	101	0.00162901		CASRDTNNQAPPF	121	0.00149419		CSEAGGQDTQYF	97	0.00149726		CASRPDSSYEQYF	122	0.00157004		CVSSLRDWGTSAETLYF	125	0.0017496		CSAGSSGNTLYF	111	0.00140219		CASGHRASAETLCF	82	0.00104406
CASSLTNWGSAETLYF	2905	0.0393752		CASSRQNNNQAQHF	2812	0.036769		CASSPGASSAETLYF	109	0.00155659		CASSLDKSYELYF	101	0.00162901		CASSD_DNSYEQYF	121	0.00149419		CAGRTANSDYTF	97	0.00149726		CASSPGAGINEQYF	122	0.00157004		CRLGGETLCF	125	0.0017496		CASSQGGLQDTQHF	111	0.00140219		CSQDGTANSDYTF	82	0.00104406
CASSFWGTSQNTLYF	2898	0.0392803		CASFGGDYAEQF	2812	0.036769		CSGGRISNERLF	109	0.00155659		CRLRARGDSDYTF	101	0.00162901		CASSQEWAPLF	121	0.00149419		CSAWGQDAQYF	97	0.00149726		CASSLDWGGGYAEQF	122	0.00157004		CASSQGEGYEQYF	125	0.0017496		CSADEQGVDTEVF	111	0.00140219		CARSHIWGYEQYF	82	0.00104406
CASSLGGENTLYF	2896	0.0392532		CASSQDLGVSYEQYF	2811	0.0367559		CSATKDTQCF	109	0.00155659		CTRSAGQTGGAYEQYF	100	0.00161288		CASSDAQGPSAETLYF	121	0.00149419		CSARIGNERLF	97	0.00149726		CASSQSGNAEQLF	122	0.00157004		CASSPGQNNSPPYF	125	0.0017496		CSADRGGAAETLYF	111	0.00140219		CASSQEGVEGRRSAETLYF	82	0.00104406
CASSLGQGDTQYF	2896	0.0392532		CASGGLGGLAETLYF	2809	0.0367297		CASSQVGDSYKQYF	108	0.00154231		CAGGTGAEQF	100	0.00161288		CSINSGSTLYF	121	0.00149419		CAGRIRGLSNERLF	97	0.00149726		CAGSQDRGSSYEQYF	122	0.00157004		CASSGINQDTQHF	125	0.0017496		CANSLRGRGTEVF	110	0.00138956		CASGDPQGSNTEVF	82	0.00104406
CASGDDGGRAEQF	2896	0.0392532		CASSPDRVAEQF	2809	0.0367297		CSATKDTRYF	108	0.00154231		CSGVAEQSF	100	0.00161288		CASSLTVNERLF	121	0.00149419		CSAEGVEEVF	97	0.00149726		CASDAAGGNQDTQYF	122	0.00157004		CSADLGRNTGQLYF	125	0.0017496		CAWSLGAFPNERLF	110	0.00138956		CASGGPQGSNTEVSF	82	0.00104406
CASSDARDRGGEQYF	2893	0.0392125		CASSLDWGNAETLYF	2790	0.0364813		CSGGQGAYERYF	108	0.00154231		CASNGGDTQYF	100	0.00161288		CASSQGGRERYF	121	0.00149419		CASGVSGTGETTLYF	97	0.00149726		CASSPGDWGDQYF	122	0.00157004		CASSQSGDNNQDTQHF	124	0.00173561		CSAAQGHPGNTLYF	110	0.00138956		CASGHRASAGTLYF	81	0.00103133
CASGDSEQYF	2890	0.0391719		CASRLGYEQYF	2787	0.0364421		CASSSDDNERLF	108	0.00154231		CTRSADTQGFNERLF	100	0.00161288		CASGDEGVGAETLYF	121	0.00149419		CSADLGGAETLYF	97	0.00149726		CAWSRAGANSGNTLHF	121	0.00155718		CASGALGGRGGQYF	124	0.00173561		CASSLDRDGNTLYF	110	0.00138956		CASSHDGTANSDYTF	81	0.00103133
CASSGDWGNYEQYF	2889	0.0391583		CASSSTGGKNTLYF	2783	0.0363898		CASSEGQRNTEAF	108	0.00154231		CASGERRFSQNTLYF	99	0.00159675		CASSQGQGGTEVF	120	0.00148184		CAWSLGGSVETLYF	96	0.00148182		CSADRTTEVF	121	0.00155718		CASSQSRAHYAEQF	124	0.00173561		CASRRTGDAEQF	110	0.00138956		CASSRDTGGYAEQF	81	0.00103133
CASSDAGGRDTQYF	2881	0.0390499		CASSPGGAEQF	2780	0.0363505		CSADRDSYNSPLCF	108	0.00154231		CASSAGTGYERLSF	99	0.00159675		CASSQGGREQHF	120	0.00148184		CGGDGYEQYF	96	0.00148182		CASSRLAGEDAQYF	121	0.00155718		CTSSDWDKEVF	124	0.00173561		CSAGGQQAQHF	110	0.00138956		CSAEEGSYNSPLYF	81	0.00103133
CAWSRQGERLF	2877	0.0389957		CASSQDGWGGYEQYF	2768	0.0361936		CNADGDWGSQNTLYF	107	0.00152803		CASSPWDWGYVEQF	99	0.00159675		CSAGGANTEVF	120	0.00148184		CSAAGTDANTEVF	96	0.00148182		CASSPYRGGQNTLYF	121	0.00155718		CASSAPQGWAETLYF	123	0.00172161		CASSDTNSDYAF	110	0.00138956		CASSQERVGGRRSAETLYF	81	0.00103133
CASGDINERLF	2867	0.0388601		CASSLGQGATNERLF	2762	0.0361152		CSSRGRDWGDEQYF	107	0.00152803		CASRGQGNSGDTLYF	99	0.00159675		CTRSAAQNTEVF	120	0.00148184		CASGGATGGASAETLYF	96	0.00148182		CSAYRGPNPDYTF	121	0.00155718		CASSIRSQNTLYF	123	0.00172161		CASSPGQGAYGQYF	109	0.00137692		CASSRTTNQDTQYF	81	0.00103133
CASSLDGVGYAEQF	2863	0.0388059		CASGEDWGDSSYEQYF	2762	0.0361152		CGAGRAEQF	107	0.00152803		CASSLDNSYEQYF	99	0.00159675		CASSQDRENNERLF	120	0.00148184		CRAAGTANTEVF	95	0.00146639		CSAGRDTSYNSPLYF	120	0.00154431		CASGHRDWATGQLYF	123	0.00172161		CASSLEGSQNTLYF	109	0.00137692		CASSYQGNTLYF	81	0.00103133
CASGDQGNSDYTF	2854	0.0386839		CASSLGVAETLYF	2743	0.0358667		CTRSAGREVF	107	0.00152803		CTRSGVAEQF	99	0.00159675		CASSQGQGDTEVLF	120	0.00148184		CASSQDAGGNTEVF	95	0.00146639		CTYSALRDRNTEVF	120	0.00154431		CASSPAAEQF	123	0.00172161		CASSQGGLSSYEQYF	109	0.00137692		CASRSGQGGTEVF	81	0.00103133
CASGDGGTGGISYEQYF	2851	0.0386433		CASSLGDRNERLF	2740	0.0358275		CGADWGSYEQYF	107	0.00152803		CSARGGYNSPLYF	99	0.00159675		CSGDNSQNILYF	119	0.00146949		CSANPFNSGNTLYF	95	0.00146639		CAGSPTNAEQF	120	0.00154431		CASGQDADWAYAEQF	123	0.00172161		CAGSPSNTEVF	109	0.00137692		CASRGISHEQYF	81	0.00103133
CASGAPGQNTEVF	2847	0.038589		CASSQQLNNQAPLF	2735	0.0357621		CSAEGEKGQNTLYF	106	0.00151375		CASSAGTGYEGLF	98	0.00158062		CQGTENTEVLF	119	0.00146949		CGADLGSAETLYF	94	0.00145095		CSGPGADAEQF	120	0.00154431		CSAAWETYAEQF	123	0.00172161		CASSQGEYYAEQF	108	0.00136429		CASSQDTGGYEQYF	81	0.00103133
CASSQGGEQYF	2844	0.0385484		CAWSLGGNQDTQYF	2732	0.0357229		CSADLGDQGTQYF	106	0.00151375		CAGRSTGGYNYAEQF	98	0.00158062		CSLRGWDAQYF	119	0.00146949		CASGPGLGASQNTSYF	94	0.00145095		CSGGTKNTLHF	119	0.00153144		CSAPHWGQDTQYF	123	0.00172161		CSETLSNERLF	108	0.00136429		CASYLWYYEQYF	80	0.0010186
CASSVQGTRAEQF	2844	0.0385484		CASSLAGKGTEVF	2728	0.0356706		CSADWGI_DTQYF	106	0.00151375		CSAEPISNEGLF	97	0.00156449		CTRSFSGTGSYEQYF	119	0.00146949		CASSWSSYEQYF	94	0.00145095		CSADRDISYNSPLYF	119	0.00153144		CSAVAGDHERLF	123	0.00172161		CSAGDRGAGTLYF	108	0.00136429		CSAGQGANTGQHYF	80	0.0010186
CASGQLGGQNTLYF	2838	0.0384671		CASSLTDYAEQF	2700	0.0353045		CSAGDTEVLF	106	0.00151375		CSAVSQDTQYF	97	0.00156449		CASSQGQTNSDHTF	119	0.00146949		CSAAGTANTGVF	94	0.00145095		CASSQDWTGASDYTF	119	0.00153144		CSVEWGQAPLF	123	0.00172161		CASSDAGTRDAEQF	108	0.00136429		CANSQQDTQYF	80	0.0010186
CAWSLSANTEVF	2837	0.0384535		CSGGQPNTEVF	2685	0.0351083		CSAGTSNAGQLYF	106	0.00151375		CSAEPTSNERLF	97	0.00156449		CASSLNRDAQYF	118	0.00145714		CTRSRGTFNTEVF	93	0.00143552		CSKRDWGGGTLYF	119	0.00153144		CSGDREVSF	122	0.00170761		CASSRDLYEQYF	108	0.00136429		CASDDETGGVF	80	0.0010186
CASSWDRGYAEQF	2832	0.0383857		CASSLGNQDTQYF	2682	0.0350691		CANMSQGRTLYCTCSATKDTQYF	105	0.00149947		CASSAGTGYGRLF	97	0.00156449		CASSLSRDTQYF	118	0.00145714		CAWSLGGSTETLYF	93	0.00143552		CSGHTSQNNLYF	119	0.00153144		CASSHPGQGSNEGLF	122	0.00170761		CASGDMAGGGNTLYF	107	0.00135166		CAGGDRGTENTEVF	79	0.00100587
CAWRTPGAEVF	2828	0.0383315		CASSLGLGGNTLYF	2672	0.0349384		CKQTGDQTTLYF	105	0.00149947		CASSLQYAEQLF	97	0.00156449		CADRNTEVF	118	0.00145714		CSATGNTPYF	93	0.00143552		CASSQGQQATRYF	119	0.00153144		CASSPTGVISNERLF	122	0.00170761		CSAGTGNTEVSF	107	0.00135166		CSGQNQDPQYF	79	0.00100587
CASSSGTGGREQYF	2826	0.0383044		CASSPSSYEQYF	2644	0.0345722		CSAAGGDTEIF	105	0.00149947		CASSAGGNSDYTF	97	0.00156449		CASS_GGREQYF	118	0.00145714		CAWSLGASAETLYF	93	0.00143552		CANMSQGRTLYCTCSADGAEQF	118	0.00151857		CSAEWRQAPLF	122	0.00170761		CAGSEPGQSNERLF	107	0.00135166		CASGDATGGYTEQF	79	0.00100587
CASSGENSDYTF	2818	0.038196		CASSFLGTYAEQF	2630	0.0343892		CNADRDSYNSPLYF	105	0.00149947		CTRSEQGRDTEVF	96	0.00154836		CSVGSSAETPYF	118	0.00145714		CASSDVGYQQYF	93	0.00143552		CSARQGANTEVF	118	0.00151857		CASSD_DKEVF	122	0.00170761		CSADRERYF	107	0.00135166		CASSWDSYAERF	79	0.00100587
CASSRDRGRAQNTLYF	2816	0.0381689		CASGEGENSDYTF	2623	0.0342976		CTRSADWGRDERLF	105	0.00149947		CASSAAGDSPLYF	95	0.00153223		CTCKSQNTLYF	118	0.00145714		CSAGTSTEVF	93	0.00143552		CSADDAEQF	118	0.00151857		CAWNLGTGRDEQYF	121	0.00169362		CSAVWGDEQHF	107	0.00135166		CTSSWDSYAEQF	79	0.00100587
CASGEGGSSYEQYF	2813	0.0381282		CASSPGPSSAETLYF	2622	0.0342846		CSAEGGGPSTETLYF	105	0.00149947		CASSQDTVSNERLF	95	0.00153223		CASGPGLGNAETPYF	117	0.0014448		CASGAQGNSGNTLYF	93	0.00143552		CSAGAPEVF	117	0.0015057		CAWSLGIGRDEQYF	121	0.00169362		CASSIEGQQDTQYF	107	0.00135166		CSAGQGGPSAETLYF	78	0.000993134
CSGGLGEDTQYF	2812	0.0381146		CASSHPQGWGTEVF	2621	0.0342715		CASSPDWGNAEQSF	104	0.00148519		CASGDAGGGSAEALYF	95	0.00153223		CSADQGGDTGQPYF	117	0.0014448		CASSQGTHDERLF	92	0.00142008		CASSRDLANTEVF	117	0.0015057		CASGDATLSNERLF	121	0.00169362		CASSRQGPSRNTLYF	107	0.00135166		CTSSQGGAYNSPLYF	78	0.000993134
CASSPRDSQDTQYF	2808	0.0380604		CSGGLQDTQYF	2601	0.03401		CSAGQTSAETPYF	104	0.00148519		CSEQGRDAEVF	95	0.00153223		CAGSPGLFYEQYF	117	0.0014448		CSAGDSQNTSYF	92	0.00142008		CSTDVGGLYAEQF	117	0.0015057		CSAECGQAPLF	121	0.00169362		CASSLLGQGYAEQSF	107	0.00135166		CASSQVGVGGRRSAETLYF	78	0.000993134
CASSDGGYEQYF	2798	0.0379249		CASSGPTGGHSYEQYF	2557	0.0334346		CSAGDRFYGNTPYF	104	0.00148519		CASGDSGAETLYF	95	0.00153223		CASSRDYAERF	117	0.0014448		CSAAGTADTEVF	92	0.00142008		CTYSAGDNYEQYF	117	0.0015057		CSADNHEQYF	121	0.00169362		CSAPHWGQETQYF	107	0.00135166		CSADEVSYNSPLYF	78	0.000993134
CASSPRGGDTQYF	2794	0.0378707		CASSFQEDTQYF	2548	0.033317		CSAGGRGTEVF	104	0.00148519		CASDRGDTQYF	94	0.0015161		CSAGGQDTQYF	117	0.0014448		CSAGQGQGTQYF	92	0.00142008		CASSPTNAEQLF	117	0.0015057		CTYRLGGETLYF	121	0.00169362		CAGSGTGGALEQYF	106	0.00133903		CASSQEEVGGRRSAETLYF	77	0.000980401
CASGLGTAETLYF	2790	0.0378164		CTRSAGLGEQNTLYF	2542	0.0332385		CASSDAQKDTEVSF	104	0.00148519		CASSLGTTNSDYAF	94	0.0015161		CASSDWDNSYEQHF	117	0.0014448		CSAGRDNYAEQF	92	0.00142008		CLAGGCAEQF	117	0.0015057		CASSPGTGNTEVSF	121	0.00169362		CASSLDRGDSGNTLCF	106	0.00133903		CASSDARDRDEPYF	77	0.000980401
CASSEPDWGTSQNTLYF	2789	0.0378029		CASSSDWDSYEQYF	2542	0.0332385		CGARDWGDEQYF	104	0.00148519		CASAPDKTYEQYF	94	0.0015161		CASRLDRANTEVF	117	0.0014448		CASSLLGNQGTQYF	92	0.00142008		CSADWGSCEQYF	116	0.00149283		CSASRG_DTQYF	120	0.00167962		CSSREGANTEVF	106	0.00133903		CVSGHRASAETLYF	77	0.000980401
CASRTGGFYNSPLYF	2781	0.0376945		CASSLRDNYEQYF	2536	0.0331601		CTRSALGVDTQYF	104	0.00148519		CSLDKSYEQYF	94	0.0015161		CSARGTEAF	117	0.0014448		CSAERGQGTTEAF	92	0.00142008		CSAEGANQDTLYF	116	0.00149283		CSAVRETYAEQF	120	0.00167962		CSADPGHNTLCF	106	0.00133903		CANMSQGRTLYCTCSGTGRTSAETLYF	77	0.000980401
CASSGLREVNQDTQYF	2776	0.0376267		CASSPGWDQAQHF	2535	0.033147		CASGADTGQLYF	104	0.00148519		CSGRDWGHQDTQYF	94	0.0015161		CTRSGQGARATEVF	117	0.0014448		CSATDTEVF	92	0.00142008		CSAGKAGNTLCF	116	0.00149283		CASSQSGAQREYF	120	0.00167962		CSETVSN_RLF	106	0.00133903		CASSYIWGYEQYF	76	0.000967669
CASSFRTGRNSDYTF	2759	0.0373963		CASSTGNEQYF	2530	0.0330816		CGANRADEQYF	104	0.00148519		CASSPDKTYEQDF	94	0.0015161		CGATGIDQAPLF	117	0.0014448		CASSQEAGRQDTQYF	91	0.00140465		CASSQDLANAEVF	116	0.00149283		CASARGNYAEQF	120	0.00167962		CASSLDRGDSGSTLYF	106	0.00133903		CTSSQGGGRSYEQHF	76	0.000967669
CAWQGNSNERLF	2758	0.0373827		CASSQEPNSGNTLYF	2519	0.0329378		CASGERQGNKQYF	103	0.0014709		CASNPWDWGYAEQF	93	0.00149998		CSAEGGGGQYF	117	0.0014448		CAGGPGLGASQNTLYF	91	0.00140465		CASSPVDWGEQYF	116	0.00149283		CASSGGQGANSPPYF	120	0.00167962		CSAPHWGQDTQ_F	106	0.00133903		CSSSLWYYEQYF	76	0.000967669
CASSDEGGQDTQYF	2753	0.0373149		CASGDRGGRTEVF	2518	0.0329247		CASSDQPYAEQF	103	0.0014709		CSADHGGTEAF	93	0.00149998		CVWSLTGGVYAEQF	116	0.00143245		CASSQDPGGVF	91	0.00140465		CSADRANTGQF	116	0.00149283		CASSDRARAPLF	119	0.00166562		CSADTGGSSPLYF	106	0.00133903		CASSHRASAETLYF	76	0.000967669
CASRDWGNQDTQYF	2750	0.0372743		CASSQEYNSPLYF	2515	0.0328855		CANMSQGRTLYCTCSAAQGNTEVF	103	0.0014709		CASSQNRGVYAEQF	93	0.00149998		CSATGINRAPLF	116	0.00143245		CASRTASSDYTF	91	0.00140465		CASSPYREGEVF	116	0.00149283		CAWSLENSQSGS_AKIQRF	119	0.00166562		CASGDGASTEVF	106	0.00133903		CASRDREVLF	76	0.000967669
CASSLEGQNNSPLYF	2745	0.0372065		CASSFGGWAETLYF	2513	0.0328593		CASGERQRNEQYF	103	0.0014709		CSADRLGASQNTLYF	92	0.00148385		CTRSASGGEQYF	116	0.00143245		CSAGQSNSPLYF	91	0.00140465		CSADVGGLCAEQF	116	0.00149283		CASSLRDWGTSTETLYF	119	0.00166562		CSQEEYYAEQF	106	0.00133903		CTSSRTINQDTQYF	75	0.000954936
CASSDRISNERLF	2745	0.0372065		CASGTGTGQNTLYF	2510	0.0328201		CTSSDAGTGAYEQYF	103	0.0014709		CASSRDWGPQDTQYF	92	0.00148385		CSADGANTEAF	116	0.00143245		CSDRGPNTEVSF	91	0.00140465		CASRGRNYAEQF	116	0.00149283		CSTDPAANTEVF	118	0.00165163		CASSFEGQQDTQYF	106	0.00133903		CASGDVTGGYAEQF	75	0.000954936
CASSLTGTNERLF	2735	0.037071		CASSLYQINYAEQF	2486	0.0325063		CSADRGTNSGYTF	103	0.0014709		CASSLDKSYKQYF	92	0.00148385		CASGPGLGNAEALYF	116	0.00143245		CADHRRAYEQYF	90	0.00138921		CGADWGSYEQYF	116	0.00149283		CSTDASSYEQYF	118	0.00165163		CSAPHSGQDTQYF	106	0.00133903		CSAGVHTLYF	75	0.000954936
CASSDANQGGNTEVF	2735	0.037071		CASGRQGAPNERLF	2444	0.0319571		CASGATGGSTEVF	102	0.00145662		CASSLSHSSNERLF	92	0.00148385		CSADRFSYERYF	116	0.00143245		CALTGGSAETLYF	90	0.00138921		CASSPDSSHEQYF	116	0.00149283		CRDNYEQCF	118	0.00165163		CASGDGANTEAF	105	0.0013264		CASRSGREGTEVF	75	0.000954936
CASSRDGDTQYF	2734	0.0370574		CASSLDRTEVF	2442	0.0319309		CSAGTGTGQPYF	102	0.00145662		CSADANN_RLF	92	0.00148385		CTRSAPTGGGGAETLYF	115	0.0014201		CSGQGRSSPLYF	90	0.00138921		CASSPSGNYGQYF	116	0.00149283		CAWRLGTGRDEQYF	118	0.00165163		CSAGIWGGGDTQYF	105	0.0013264		CASSLWYYQQYF	74	0.000942204
CASGDANRANQAPLF	2719	0.0368541		CASSQEEGGAETLYF	2438	0.0318786		CSGPGGADQDTQYF	102	0.00145662		CASGDAGLGGRQNTSYF	92	0.00148385		CSGQGARATEVLF	115	0.0014201		CTYSAAGTANTEVF	90	0.00138921		CAWRRTFNNQARHF	116	0.00149283		CASSQERNSNEGLF	117	0.00163763		CASSLRGQGTEVF	105	0.0013264		CASTSQGSDTEVLF	74	0.000942204
CASSQVQTGGVAETLYF	2717	0.036827		CASSAGQGESDYTF	2409	0.0314994		CTRSAGGGQDTQYF	102	0.00145662		CSLEIQSSEAGDSALYLRASSGTGYTEVF	92	0.00148385		CSVGQNTGQPYF	115	0.0014201		CASSQTGNDQAPLF	90	0.00138921		CASSQDLANTGVF	115	0.00147996		CSALGRLAEQF	117	0.00163763		CAGSDTNSDYTF	105	0.0013264		CASGDVTGGVF	73	0.000929471
CASSSGTGGIEQYF	2713	0.0367728		CASSLLGGSYEQYF	2395	0.0313164		CASSQDGGDTEVLF	102	0.00145662		CSADANTEVF	91	0.00146772		CSAGQHNSPLYF	115	0.0014201		CSADLFNSGNTLYF	90	0.00138921		CAGSQGQGTSDYTF	115	0.00147996		CDSSQSRDHYAEQF	117	0.00163763		CANMSQGRTLYCTCSARGGDTQYF	105	0.0013264		CAGRSGQEGTEVF	73	0.000929471
CASSSGQTNSDYTF	2712	0.0367592		CASSFRAEQF	2388	0.0312248		CASSPGTPSAETLYF	101	0.00144234		CASSRDGNTEVF	91	0.00146772		CASSQGQGDAEVF	115	0.0014201		CASADKDSNERLF	90	0.00138921		CASSQDLAGYEQHF	115	0.00147996		CASGAWTGQNTLHF	117	0.00163763		CASGADRVNHAEQF	105	0.0013264		CASGQDGGEVF	73	0.000929471
CASSEMTDTEVF	2709	0.0367186		CASSLGTGVEQYF	2384	0.0311725		CASSDQSYAEQLF	101	0.00144234		CTGQLYF	91	0.00146772		CSAVGDQGTQYF	115	0.0014201		CSAATGGLSNERLF	89	0.00137377		CASGQGQGTSDYTF	115	0.00147996		CSADQYNAETLCF	116	0.00162363		CSLEIQSSEAGDSALYLRASSDTGGSLYF	105	0.0013264		CSGLNQDTQYF	73	0.000929471
CASGGRQNTEVF	2703	0.0366372		CAWRQFSNERLF	2370	0.0309895		CSAGINTEVF	101	0.00144234		CASSDAGANTEVF	91	0.00146772		CSASRDPGGDTQHF	115	0.0014201		CASSWGQGNSPLYF	89	0.00137377		CSAHRGPNSDYTF	115	0.00147996		CASGHPGQGSNERLF	116	0.00162363		CASSLAGAETLYF	105	0.0013264		CSLTGVHQAPLF	73	0.000929471
CASSSGQSNTEVF	2702	0.0366237		CASSFKGDTQYF	2356	0.0308064		CSAEGGGPSAEALYF	101	0.00144234		CASSLGATNSDYTF	91	0.00146772		CSAEGLGGSQDTLYF	115	0.0014201		CSAPGTDANAEVF	89	0.00137377		CANSGDTQAQHF	115	0.00147996		CSAEWG_APLF	116	0.00162363		CASSPDSSGNTLYF	105	0.0013264		CSQGGGRSYEQYF	73	0.000929471
CASSLGSYEQYF	2702	0.0366237		CASTGYEQYF	2348	0.0307018		CASSPDRANAEVF	101	0.00144234		CSADTQGFNEGLF	91	0.00146772		CASSPRGRQNALYF	114	0.00140775		CSVLGVQDTQYF	89	0.00137377		CAWSRAGADSGNTLYF	115	0.00147996		CASSTTSNSDYTF	115	0.00160964		CASSQGTWGSAETLYF	105	0.0013264		CANSPTASNERLF	73	0.000929471
CASSSLTGGAGAEQF	2700	0.0365966		CASSPGGQDTQYF	2335	0.0305318		CSADRGQYERYF	101	0.00144234		CSGDANNERLF	90	0.00145159		CMALSNEGLF	114	0.00140775		CAGSLDLPGLGGYEQYF	89	0.00137377		CANGAAGGNQDTQYF	114	0.00146709		CSADPAVNTEVF	115	0.00160964		CAGSLGDREVF	105	0.0013264		CASSQDGGGGRRSAETLYF	73	0.000929471
CASRSTGGALEQYF	2699	0.036583		CSADMAGDYEQYF	2327	0.0304272		CSADQGRQNILYF	100	0.00142806		CAGSDEGDEQYF	90	0.00145159		CSAGRRNSPLYF	114	0.00140775		CSGAGGPSAETLYF	89	0.00137377		CASSQDRGDQDAQYF	114	0.00146709		CASSLRDWRTSAETLYF	115	0.00160964		CASSEKDRGYE_YF	104	0.00131376		CASSLSDFNYAEQLF	73	0.000929471
CASGRTVNQDTQYF	2694	0.0365152		CASRNREGQNTLYF	2326	0.0304142		CNADQGRQNTLYF	100	0.00142806		CASSDGGDSPLYF	90	0.00145159		CSFSGTGPYEQYF	114	0.00140775		CASSQGASNTEVF	89	0.00137377		CSADSAEQF	114	0.00146709		CASSALQGWVETLYF	115	0.00160964		CGAVWGDEQYF	104	0.00131376		CTSSQGGGRSYERYF	73	0.000929471
CASRPGQTNSDYTF	2692	0.0364881		CASSLDRGQGKDTQYF	2318	0.0303095		CASGERQENEQYF	100	0.00142806		CSERDWGHQGTQYF	90	0.00145159		CASSPRGRQSTLYF	114	0.00140775		CTRSAGDSQNTLYF	89	0.00137377		CASSQDWGEQYF	114	0.00146709		CTYSANSYNSPLYF	115	0.00160964		CASSLKGQQDTQYF	104	0.00131376		CTSSQGGRRSYEQYF	72	0.000916739
CASSDAPSAETLYF	2691	0.0364746		CASSFGTGGSQNTLYF	2315	0.0302703		CSANQGRQNTLYF	100	0.00142806		CASSARTGYERLF	90	0.00145159		CSAEEGGEQYF	114	0.00140775		CSADSQNTSYF	89	0.00137377		CASSQGAGAETLYF	114	0.00146709		CGSSPGGSAETLYF	115	0.00160964		CASSPSNTEVLF	104	0.00131376		CDSSLWYYEQYF	72	0.000916739
CASGRRSGSNSDYTF	2689	0.0364475		CASSRTGVGNTLYF	2308	0.0301788		CTWSPRQTNSGNTLYF	100	0.00142806		CSLEIQSSEAGDSALYLCASSLSAGGQDTQYF	90	0.00145159		CSATGGAYGQYF	114	0.00140775		CNADPFNSGNTLYF	89	0.00137377		CSADGAE_F	114	0.00146709		CASGALGGRDEQYF	115	0.00160964		CSAAQGHSGSTLYF	104	0.00131376		CRARNQAPLF	72	0.000916739
CASGDADNQAPLF	2687	0.0364204		CASSRDWGSYEQYF	2307	0.0301657		CSGWGGAQDTQYF	100	0.00142806		CASSSWDWGYAEQF	90	0.00145159		CGLRGWDTQYF	114	0.00140775		CGAAGTANTEVF	89	0.00137377		CASGAAGGNQDIQYF	114	0.00146709		CASSEINQDTQYF	115	0.00160964		CASRALNQDTQYF	104	0.00131376		CASSQQGTYNSPLYF	72	0.000916739
CASSFGQGATGNTLYF	2682	0.0363526		CASSFLGTGSNERLF	2298	0.030048		CSATRDTQYF	100	0.00142806		CGSSDAGDSPLYF	90	0.00145159		CSAVADTGQLYF	114	0.00140775		CSADRANTEAF	89	0.00137377		CASSPRGGTGQLYF	114	0.00146709		CSAELNERLLF	115	0.00160964		CASGHYERYF	104	0.00131376		CTSSQGGGRSYEQCF	72	0.000916739
CASSGGQYEQYF	2678	0.0362984		CASSVGQGVDERLF	2295	0.0300088		CASSESAETLYF	100	0.00142806		CASSLSHFSNERLLF	90	0.00145159		CSAGTGGNQAPLF	114	0.00140775		CSGPGLGGDYAEQF	88	0.00135834		CSADCNSYNSPLYF	113	0.00145422		CASSPVAEQSF	115	0.00160964		CASSLSQAEQF	104	0.00131376		CSGQNQDTQYFGPGTRLLYNNEPASF	72	0.000916739
CSERDNNERLF	2677	0.0362848		CASSWRNYEQYF	2291	0.0299565		CTRSAGASQDTQYF	100	0.00142806		CSAANQDTQYF	89	0.00143546		CSASQSNYAGQF	113	0.0013954		CTRSAGQGQDTQYF	88	0.00135834		CSAVGQNTLYF	113	0.00145422		CAGSQESSAETLYF	115	0.00160964		CASSPGDTQYF	104	0.00131376		CASSLWYSEQYF	71	0.000904006
CASSLEDWGYAEQF	2675	0.0362577		CASSRAGGENTLYF	2281	0.0298257		CASSSGTSSAETLYF	99	0.00141378		CSAVGGKYEQHF	89	0.00143546		CASSQGQGDTEAF	113	0.0013954		CSAGTNTEAF	88	0.00135834		CASSQARGRSPPYF	113	0.00145422		CSAARETYAE_F	115	0.00160964		CASTDSQSTLYF	103	0.00130113		CVSRGISYEQYF	71	0.000904006
CAGDRGPFSYEQYF	2669	0.0361764		CASSSQGREDTQYF	2274	0.0297342		CASSDVGYGQYF	99	0.00141378		CASGQDTQYF	89	0.00143546		CTRSVGQNTGQLYF	113	0.0013954		CASARTSNQAPLF	88	0.00135834		CSGHISQNTLYF	113	0.00145422		CANSLRDWGTSAETLYF	115	0.00160964		CSAPHWGKDTQYF	103	0.00130113		CVSSDARDRDEQYF	71	0.000904006
CASSLGDRGSGNTLYF	2668	0.0361628		CASSLGGGLNTGQLYF	2271	0.029695		CSADINTEVSF	99	0.00141378		CSGGKNTEVF	88	0.00141933		CASSHRDWGAEQYF	113	0.0013954		CSAGLSANTEVF	88	0.00135834		CSGTTNTEVF	113	0.00145422		CASGGPGRGAEQF	115	0.00160964		CSAPHLGQDTQYF	103	0.00130113		CASSQQGAYNSSLYF	71	0.000904006
CASSQPGWAETLYF	2668	0.0361628		CASSHRQGAGERLF	2266	0.0296296		CSAASLGGRGTQYF	99	0.00141378		CTRSADRLGVSQNTLYF	88	0.00141933		CSVGQSTGQLYF	113	0.0013954		CSADRGNYAEQF	88	0.00135834		CSSTGTGGSQNTLYF	113	0.00145422		CASSEGQANTRQLYF	114	0.00159564		CASSQEDWGHEQYF	103	0.00130113		CASGPGTGDYNNQAPLF	71	0.000904006
CASSPTANTEVF	2663	0.0360951		CASSLAGDSGNTLYF	2246	0.0293681		CASSQEDRGNYEQYF	99	0.00141378		CVSSQDLSYNNQAPLF	88	0.00141933		CAGSTHERAYEQYF	113	0.0013954		CANSDAGYEQYF	88	0.00135834		CASSPDSSYEQCF	113	0.00145422		CAWSLGTGRDKQYF	114	0.00159564		CASGDGWGANTGQPYF	103	0.00130113		CSAGLNTLYF	71	0.000904006
CASSDDGQSSYEQYF	2658	0.0360273		CASSPLQGYAEQF	2235	0.0292243		CSADQRRQNTLYF	99	0.00141378		CASGGTGRDTLYF	88	0.00141933		CSVGPSAETLYF	113	0.0013954		CAGSPYRGQAPLF	87	0.0013429		CASSQDLGQNTLYF	113	0.00145422		CSPRQFSNERLLF	114	0.00159564		CASSQEEYYAGQF	103	0.00130113		CVSSRTINQDTQYF	71	0.000904006
CASSFREDYAEQF	2657	0.0360137		CASSQDTGEDEQYF	2226	0.0291066		CASGKTGGSTEVF	99	0.00141378		CAGNRGDTQYF	87	0.0014032		CTPTLGGGTGQLYF	113	0.0013954		CTCRRDINSDYTF	87	0.0013429		CSSAGTGGGQNTLYF	112	0.00144135		CSADASSCEQYF	114	0.00159564		CASSDAGTGGAEQF	103	0.00130113		CASSHIWGYKQYF	71	0.000904006
CASSDARDWGYEQYF	2656	0.0360002		CASSALGASYEQYF	2224	0.0290804		CSADRDSYNSSLYF	98	0.0013995		CSADRLGVSQNTSYF	87	0.0014032		CASSGRGHSYEQYF	113	0.0013954		CSAGQGGSNERLF	87	0.0013429		CSTTGDSAETLYF	112	0.00144135		CASSWDRAYEQYF	114	0.00159564		CASGTWGPQNTLYF	103	0.00130113		CASSQGGGRSYEQCF	71	0.000904006
CASSPGTGSNERLF	2648	0.0358917		CSARAANTEVF	2221	0.0290412		CSAGPETLYF	98	0.0013995		CASRDWGYEQCF	87	0.0014032		CSADGANTEVLF	113	0.0013954		CTRSADRDNYAEQF	87	0.0013429		CASSQDGSPYAEQLF	112	0.00144135		CASSQDGGARSYEQYF	114	0.00159564		CASSDTGGSSYF	103	0.00130113		CASSQDGTANF	71	0.000904006
CASSDSGNTLYF	2647	0.0358782		CASSLPQNTLYF	2217	0.0289889		CSGTGGARDAQYF	98	0.0013995		CASSISRANTGQLYF	87	0.0014032		CSFSGTGSYGQYF	112	0.00138305		CRQDINSDYTF	87	0.0013429		CSADRQGRSSPLYF	112	0.00144135		CSADQGHTGQLHF	113	0.00158164		CASGDARNTGQLCF	103	0.00130113		CASSRTINQDTPYF	70	0.000891274
CASSSSGSGQLYF	2647	0.0358782		CSAGLGEQSTLYF	2215	0.0289627		CSSRRGLGEDAQYF	98	0.0013995		CASSFRDWGYAEQLF	86	0.00138707		CSVGTGVNQAPLF	112	0.00138305		CSASGGSAGTLYF	87	0.0013429		CSTRQGASTEVF	112	0.00144135		CSALRGLAEQF	113	0.00158164		CTSSDGFTLYF	103	0.00130113		CSLRGVNQAPLF	70	0.000891274
CASSGPGQGFSDYTF	2638	0.0357562		CASSPTGGSSQNTLYF	2211	0.0289104		CSAGGGGPSAETLYF	98	0.0013995		CASTRQDANTEVF	86	0.00138707		CSADQGGDAGQLYF	112	0.00138305		CTRSAVRDSQNTLYF	87	0.0013429		CSAYRGPNSDCTF	111	0.00142848		CASSPRTGNTEVF	113	0.00158164		CSAEGQQARHF	103	0.00130113		CASDHRASAETLYF	70	0.000891274
CASGGQGNTEVF	2636	0.0357291		CASGDPDPSSYEQYF	2209	0.0288843		CSADPTDDSPLYF	98	0.0013995		CSADRLGVSQSTLYF	86	0.00138707		CTRSAGQLSNERLF	112	0.00138305		CRQGTYGQYF	87	0.0013429		CNAGRDISYNSPLYF	111	0.00142848		CSPRQFPNERLF	113	0.00158164		CSADREQHF	102	0.0012885		CASGSRQSQNTLYF	70	0.000891274
CASGAPGHPEVF	2625	0.03558		CASSPGTGAYEQYF	2178	0.0284789		CSDWGGAQDAQYF	98	0.0013995		CASSAGDYAEQF	85	0.00137095		CSADQGGGTGQLYF	112	0.00138305		CSALGDNYAEQLF	87	0.0013429		CSADSGGNCAEQF	111	0.00142848		CSGLGGGDTRYF	113	0.00158164		CSADWGASTEVSF	102	0.0012885		CASSQLGAYNSPLYF	69	0.000878541
CASSGWSSQNTLYF	2617	0.0354716		CASSLAPDWGGQNTLYF	2167	0.0283351		CANGDIWGSSYEQYF	98	0.0013995		CASSQDLSHNNQAPLF	85	0.00137095		CSADRTGGGEQYF	112	0.00138305		CASSLGDIFSDERLF	87	0.0013429		CASRGQNYAEQLF	111	0.00142848		CASSQGWTGIDTQYF	113	0.00158164		CSAERQGTGRLYF	102	0.0012885		CASGDALNSDYTF	69	0.000878541
CASGDAGSSYEQYF	2616	0.035458		CASMGGRDAEQF	2163	0.0282828		CSARKDTQYF	97	0.00138522		CASSLEAVPSYEQYF	85	0.00137095		CSADHWDSGNTLYF	112	0.00138305		CPSSDVGYEQYF	87	0.0013429		CRAPGADAEQF	111	0.00142848		CAWSHWGNHAEQF	113	0.00158164		CSAVGTNSDYAF	102	0.0012885		CSADEGCYNSPLYF	69	0.000878541
CASSAPGRDTEVF	2612	0.0354038		CASSDATKDTQYF	2156	0.0281913		CSAAGGGTEVF	97	0.00138522		CASSFRDWGYAEQSF	84	0.00135482		CQGTENTEAF	112	0.00138305		CSARGTQYF	86	0.00132747		CASSQGPGGSTQYF	111	0.00142848		CAGARDNYAEQF	113	0.00158164		CASGPTTNTEQLYF	102	0.0012885		CSASRGQNTVYF	69	0.000878541
CASSLDSQASAETLYF	2611	0.0353902		CASSSREANTGQLYF	2143	0.0280213		CAGSDQSYAEQF	97	0.00138522		CSAEPISDERLF	84	0.00135482		CRVSGGGTEVF	112	0.00138305		CASSLGDIFSNERLSF	86	0.00132747		CASSQGHANTGQPYF	111	0.00142848		CASSESGGGQDTLYF	113	0.00158164		CSARGQDTQYF	102	0.0012885		CSAARGQNTLYF	69	0.000878541
CASGDASGTSNERLF	2609	0.0353631		CASSLGGNSDYTF	2112	0.0276159		CSANRAGEQYF	97	0.00138522		CASPPGGNSDYTF	84	0.00135482		CASSLKTNSNPEVF	112	0.00138305		CSGLGGPQNTSYF	86	0.00132747		CASSHGDWGEQYF	110	0.00141561		CSTAGTGVAEQF	113	0.00158164		CAGSDTGGSLYF	102	0.0012885		CASSQEGGRSYEQYF	68	0.000865809
CASSPGNNNQAPLF	2607	0.035336		CASGHRGDSDYTF	2108	0.0275636		CSANRADGQYF	96	0.00137094		CASGTGAERF	84	0.00135482		CSSPTGGPNQDTQYF	111	0.0013707		CSAPGLGASAETPYF	86	0.00132747		CASSQDLSQSTLYF	110	0.00141561		CQSRDHYAEQF	112	0.00156765		CSAPGGRNTGQLHF	101	0.00127587		CASSQDAGGYAEQF	68	0.000865809
CASSAGLGASAETLYF	2605	0.0353089		CASSLTASSAETLYF	2096	0.0274067		CASGEALRDKNTEVF	96	0.00137094		CSAEGGEVLF	84	0.00135482		CTRSATGVGGNTLYF	111	0.0013707		CSAGPDTEAF	86	0.00132747		CSAEGANQDTQHF	110	0.00141561		CASSRSGTQREYF	112	0.00156765		CSQGSGTGAERLF	101	0.00127587		CSGQTQDTQYF	68	0.000865809
CASGGTGASDYTF	2602	0.0352682		CASSYYWGEQYF	2093	0.0273675		CARGETGGSTEVF	96	0.00137094		CASSAGAGYERLF	84	0.00135482		CSADHEAPLF	111	0.0013707		CGAPGGTSQNTLYF	86	0.00132747		CASSLRGRDNQAQHF	110	0.00141561		CASGPGQNNSPLYF	112	0.00156765		CSLEIQSSEAGDSALYLCASSLYSQYEQYF	101	0.00127587		CSGTGRSSAETPYF	68	0.000865809
CASSFPQGNTEVF	2598	0.035214		CASGARTGVNTLYF	2085	0.0272629		CASGETGGSTEIF	96	0.00137094		CSAVGGKYERYF	83	0.00133869		CASSSDPGSAETLYF	111	0.0013707		CGARDTQYF	86	0.00132747		CASRGLGGDGQYF	110	0.00141561		CSAVGEEQYF	112	0.00156765		CASSLEDSQSTLYF	101	0.00127587		CASRSGQEGTEVSF	68	0.000865809
CASRREGRVDTEVF	2594	0.0351598		CASSFRGPSGNTLYF	2083	0.0272368		CSVAQGNTEVF	96	0.00137094		CASRSTGGYNYAEQSF	83	0.00133869		CSADPGGNEQYF	111	0.0013707		CAWSLGTEVF	86	0.00132747		CASSLRGNTEVF	109	0.00140274		CSPRQFSDERLF	111	0.00155365		CASSDDWGGEGQYF	101	0.00127587		CASSLWYYEQ_F	67	0.000853076
CASGEGGTYEQYF	2588	0.0350785		CASSFYETNSPLYF	2071	0.0270798		CSAGDRFYGDTLYF	95	0.00135666		CASSAGTGYERF	83	0.00133869		CASSLDRDTQYF	111	0.0013707		CASSQETGRQDTQCF	86	0.00132747		CASSPGHWGEQYF	109	0.00140274		CASSLIGANSDYTF	111	0.00155365		CSADWGAGTEVF	101	0.00127587		CAGSFPTGGSYEQYF	67	0.000853076
CASSGSRDRGLEQYF	2584	0.0350243		CASSDASQGHEQYF	2060	0.026936		CAWSPGGMNQAPLF	95	0.00135666		CASSDAGGVQYF	83	0.00133869		CRGPDYAF	111	0.0013707		CASSDVGY_QYF	86	0.00132747		CASSQDPAEGHAEQF	109	0.00140274		CASSESGGGRNTLYF	111	0.00155365		CSADGQGADTEVF	101	0.00127587		CASRSGQEGTEVLF	67	0.000853076
CASGDAIYNYAEQF	2584	0.0350243		CASSHRGRTERLF	2045	0.0267399		CSADPTDNSPLHF	95	0.00135666		CAGSAGTGYERLF	82	0.00132256		CASSLKTNSNTEGF	111	0.0013707		CASSAGTDYEQYF	86	0.00132747		CSTTVNTEVF	109	0.00140274		CASNLRDREDEQYF	111	0.00155365		CASSTWGPQSTLYF	101	0.00127587		CASIGLGGTEQF	67	0.000853076
CASSLGTTNTEVF	2581	0.0349836		CASSLNSAETLYF	2031	0.0265568		CSADQERQNTLYF	95	0.00135666		CASSSRQGRAETLYF	82	0.00132256		CASGGGQGNYAE_F	111	0.0013707		CGALGVQDTQYF	86	0.00132747		CASGPRGDTGQLYF	108	0.00138988		CAWSLGTGIDTQYF	111	0.00155365		CAGGDGANTEVF	101	0.00127587		CASSHPSTEVF	67	0.000853076
CASGDARTGGLNYAEQF	2581	0.0349836		CASRGTGQNTLYF	2023	0.0264522		CSAEGQGTGQLYF	95	0.00135666		CTRSAEPISNERLF	82	0.00132256		CGAPGGYEQYF	111	0.0013707		CASGVGTDANTEVLF	86	0.00132747		CSADRQGRNSSLYF	108	0.00138988		CSVEGAPLF	111	0.00155365		CASSLGRSGNTLYF	101	0.00127587		CASNPTASNERLF	67	0.000853076
CASGDSHWGGQYEQYF	2576	0.0349158		CASSLSRGSSYEQYF	2021	0.0264261		CGADINTEVF	95	0.00135666		CGAEPISNERLF	82	0.00132256		CASSSSGAGNTLYF	111	0.0013707		CSADWGASGQYF	85	0.00131203		CSANPVNTLYF	108	0.00138988		CAGSQDEGYEQYF	111	0.00155365		CSVRGGDTQYF	101	0.00127587		CSARTQAPLF	66	0.000840344
CASRGRGNTEVF	2574	0.0348887		CASSLEWDRGYEQYF	2016	0.0263607		CSAGTGGAEVLF	95	0.00135666		CASDDGGAETLYF	82	0.00132256		CASSLLGQGGGQYF	111	0.0013707		CAWSLGGSAETLCF	85	0.00131203		CSATRDEQYF	108	0.00138988		CSGRQTNTEVF	110	0.00153965		CASSPYWGNYAAQF	101	0.00127587		CASGLRASAETLYF	66	0.000840344
CASSLGQGSYAEQF	2569	0.034821		CASSLEGVSYEQYF	2002	0.0261776		CSADPTDNPPLYF	95	0.00135666		CASSAGTGHERLF	81	0.00130643		CASGDERVGAETPYF	111	0.0013707		CSAVRDGQNTLYF	85	0.00131203		CSADRANTEQLYF	108	0.00138988		CASSQSGDNDQDTQYF	110	0.00153965		CASGPTANTGQLYF	101	0.00127587		CSADVGSYNSPLYF	66	0.000840344
CASSQDGGSGNTLYF	2562	0.0347261		CASSLGSSNSGNTLYF	1995	0.0260861		CSAQDWGDEQYF	95	0.00135666		CSVDGRNTEVF	81	0.00130643		CAWSLTGGVYAERF	111	0.0013707		CSADRDGQNTSYF	85	0.00131203		CSAEREGNSPLYF	108	0.00138988		CSSKGLFSNERLF	110	0.00153965		CSVGDRGAETLYF	101	0.00127587		CSLTGDNQAPLF	66	0.000840344
CASSRQNNNQAPLF	2559	0.0346854		CSAGLGEQNALYF	1989	0.0260076		CSAGDWGDYAEQF	94	0.00134238		CSAGPISNERLF	81	0.00130643		CRVSGGVAEVF	111	0.0013707		CSAGQGNEGLF	85	0.00131203		CASSQDREEDTQYF	108	0.00138988		CASSQARSQDTLYF	110	0.00153965		CGAGANTEVF	101	0.00127587		CASSLWYY_QYF	66	0.000840344
CASSKTGEGTEVF	2551	0.034577		CASSQTGGSSYEQYF	1989	0.0260076		CSASRADEQYF	94	0.00134238		CASSHDKSYEQYF	81	0.00130643		CGNPTGGPNQDTQYF	111	0.0013707		CASGDFTQYF	85	0.00131203		CSATGGYNQAQHF	107	0.00137701		CAGSQRQGAEQF	110	0.00153965		CGADTGGNSPLYF	100	0.00126323		CSAGQGAHTGQLYF	66	0.000840344
CASSRDRGRDSGNTLYF	2547	0.0345228		CASSQGVYAEQF	1980	0.02589		CAWSHISQILQDRQLGSMTEK_SF	94	0.00134238		CRLRDGGDSDYTF	81	0.00130643		CSAVANAGQLYF	111	0.0013707		CTRSADWGEVAETLYF	85	0.00131203		CSADGAKQF	107	0.00137701		CASSQDADWAYAEQSF	110	0.00153965		CASGVGTGASGNTPYF	100	0.00126323		CSADERSYNSPLYF	66	0.000840344
CASSLYPGAGEQYF	2544	0.0344821		CASGDGGAQNTLYF	1980	0.02589		CASDETGGSTEVF	94	0.00134238		CASRPGQNAEVF	81	0.00130643		CASSLAGTDTEVF	110	0.00135835		CASSFRDRNSPLYF	85	0.00131203		CTRSARGGSSETLYF	107	0.00137701		CRDRFSNERLF	110	0.00153965		CTETVSNERLF	100	0.00126323		CASSPGTGDYNSPLYF	66	0.000840344
CSADMGFSAETLYF	2539	0.0344143		CASSLKHSGNTLYF	1964	0.0256807		CSAGLGGRKQYF	94	0.00134238		CSADTQGSNERLF	81	0.00130643		CASSLTGAGAGLF	110	0.00135835		CASSQDGLGGGDTQYF	85	0.00131203		CSVSGTGAEQF	107	0.00137701		CSADKYEQYF	110	0.00153965		CASSDDAANERLF	100	0.00126323		CASSVWYYEQYF	65	0.000827611
CASSLDF	2530	0.0342923		CASSSGTANSDYTF	1950	0.0254977		CSGGRGAYEQYF	94	0.00134238		CASSFWDRGYAEQF	80	0.0012903		CMALSNEK_SF	110	0.00135835		CASGDATGEASAETLYF	84	0.0012966		CSGPGQANTEVSF	107	0.00137701		CASSLQDREDEQYF	110	0.00153965		CASSLDRGANTGQLHF	100	0.00126323		CSASRGQNQDTQYF	65	0.000827611
CASARAGSNERLF	2529	0.0342788		CSAGTGEVF	1937	0.0253277		CSGQSQNTSYF	94	0.00134238		CASGDEGDEQYF	80	0.0012903		CTRSPGLGGQDTQYF	110	0.00135835		CGAPGTDANTEVF	84	0.0012966		CASRPLGDYAEQF	107	0.00137701		CNADNYEQYF	110	0.00153965		CSDDWGGEEQYF	100	0.00126323		CSLTGVKQAPLF	65	0.000827611
CASSSGVGNTLYF	2528	0.0342652		CASSSGTGDQAQHF	1911	0.0249877		CSADLGRQNTLHF	94	0.00134238		CARSLDKSYEQYF	80	0.0012903		CSAEGRGEQYF	110	0.00135835		CAGSLGDIFSNERLF	84	0.0012966		CASGPRDWGYEQYF	107	0.00137701		CSAAGTGVAE_F	110	0.00153965		CTSSLRGRGTEVF	100	0.00126323		CASSQGGGRSCEQYF	65	0.000827611
CASSPRTGGGAETLYF	2527	0.0342517		CASGGNPNGTGSLSQNTLYF	1891	0.0247262		CASSQGLNTEAF	94	0.00134238		CSAGTQGFNERLF	80	0.0012903		CSDPTGGPNQDTQYF	110	0.00135835		CSAGWGASEQYF	84	0.0012966		CSADAQDTLYF	106	0.00136414		CSAARTGVAEQF	110	0.00153965		CASNPAGAETLYF	100	0.00126323		CASTSQGSDAEVF	65	0.000827611
CASSLVDSGNTLYF	2526	0.0342381		CASSLSHSGSAETLYF	1872	0.0244778		CSARD_GDEQYF	94	0.00134238		CASSDAGDTPLYF	80	0.0012903		CTRSADNRGQNTLYF	110	0.00135835		CRRDINSGYTF	84	0.0012966		CSGTANTDVF	106	0.00136414		CSVARETYAEQF	109	0.00152565		CSAPHWGDTQYF	100	0.00126323		CASSPSGTTNTEVLF	65	0.000827611
CASSQGWGEDTQYF	2525	0.0342246		CASSSDKYEQYF	1864	0.0243732		CTRSADLGDQDTQYF	94	0.00134238		CAGSLSHFSNERLF	79	0.00127417		CVSSDWDNSYEQYF	110	0.00135835		CSVGQGGSNEGLF	84	0.0012966		CSADRTNTGQLYF	106	0.00136414		CRPGQNYTEQF	109	0.00152565		CASSDDRGGEEQYF	100	0.00126323		CSADEGSYNSHLYF	65	0.000827611
CASSPGQANSDYTF	2516	0.0341026		CASGSGTGGSNERLF	1848	0.024164		CASSLWTVQYF	94	0.00134238		CSPDANNERLF	79	0.00127417		CSADTYGQYF	110	0.00135835		CRRDISSDYTF	83	0.00128116		CASSQGRGDQDTQYF	106	0.00136414		CSPRQFSSERLF	109	0.00152565		CSTDRADTEVF	99	0.0012506		CASSQDTGRYAEQF	65	0.000827611
CASGDRDINYAEQF	2499	0.0338722		CGAGLGEQNTLYF	1824	0.0238501		CASSRPGQGNNQAPLF	94	0.00134238		CAWSLLRNSGDTLYF	79	0.00127417		CSADRGAGPLF	110	0.00135835		CSAAGPNERLF	83	0.00128116		CSGHTNQNTLYF	106	0.00136414		CASSQDRLEGSQNTLYF	109	0.00152565		CSAPHWGQATQYF	99	0.0012506		CASGDATGGYAE_F	65	0.000827611
CASKQRGCTQYF	2489	0.0337366		CASSETNSDYTF	1809	0.023654		CTSSAVRDSNTGQLYF	93	0.0013281		CSADTQGFNGRLF	79	0.00127417		CASSLMTNSNTEVF	110	0.00135835		CASSQDLWGNAEQF	83	0.00128116		CSAEALDQDTQYF	106	0.00136414		CASSHPGQGSDERLF	109	0.00152565		CASSAWGPQNTLYF	99	0.0012506		CASGDREVF	64	0.000814879
CASSFRRLNQDTQYF	2485	0.0336824		CASSLDRQSNTEVF	1793	0.0234448		CSADWGRDGRLF	93	0.0013281		CAWTWGANYAEQF	79	0.00127417		CSAGSSAETLYF	110	0.00135835		CSADPRNTEVF	83	0.00128116		CASSPSRNYEQYF	106	0.00136414		CSPRQFSNEK_SF	109	0.00152565		CAGRGQSQNTLYF	99	0.0012506		CTSSQGGGRSHEQYF	64	0.000814879
CASSLAPDWGGQDTQYF	2479	0.0336011		CASSSRLTSAETLYF	1765	0.0230787		CASGNASNERLF	93	0.0013281		CSEQGRDTEVSF	79	0.00127417		CASGVPGQGPDTEVF	109	0.00134601		CSVPGTDANTEVF	83	0.00128116		CASRLGGPYAEQF	106	0.00136414		CSADQYNAETLF	109	0.00152565		CASSEPGQSNEGLF	99	0.0012506		CASSFPAGGSYEQYF	64	0.000814879
CSLSGQSYEQYF	2478	0.0335875		CASGDYDSPLYF	1754	0.0229348		CAWSLGREVF	92	0.00131382		CASSSSHFSNERLF	79	0.00127417		CASSPGTNSYNSPPYF	109	0.00134601		CSAGRDWGAWLAEQLF	83	0.00128116		CSADWATEVF	106	0.00136414		CASSWDGVYEQYF	108	0.00151166		CAGGDGWGANTGQLYF	99	0.0012506		CSGHNQDTQYF	64	0.000814879
CASSRDWGVAETLYF	2475	0.0335468		CASSRTSNSDYTF	1742	0.0227779		CSGGLGSTLYF	92	0.00131382		CAWRGTGGAREQYF	78	0.00125804		CTRSADTGAEQF	109	0.00134601		CSEPGLGGDYAEQLF	83	0.00128116		CNGTANTEVF	106	0.00136414		CASGA_TGQNTLYF	108	0.00151166		CSAPGGANTGQLHF	99	0.0012506		CASSPGTGDCNNQAPLF	64	0.000814879
CASSLDRGTVNYAEQF	2467	0.0334384		CASGRLGASAETLYF	1728	0.0225949		CASSGGQRNTEVF	92	0.00131382		CASGQEGRGQNTLYF	78	0.00125804		CASSLNRGTQYF	109	0.00134601		CASSDEENTLYF	83	0.00128116		CASSQEGWGSSYEQYF	106	0.00136414		CSAVAGGHERLSF	108	0.00151166		CSAPHWGVQDTQYF	98	0.00123797		CASSRDGGEVF	64	0.000814879
CASSLGGQNTLYF	2435	0.0330047		CASSSNSQNTLYF	1725	0.0225556		CSAGGEKSQNTLYF	92	0.00131382		CTRSERDWGHQDTQYF	78	0.00125804		CTRSAGDSQNTLYF	109	0.00134601		CAGDRGSTEIF	83	0.00128116		CSADYNSYNPPLYF	106	0.00136414		CASSQSGTQRGYF	108	0.00151166		CAGGPTTNTGQLYF	98	0.00123797		CASSQQGAYDSPLYF	64	0.000814879
CASGDADRGVF	2433	0.0329776		CASSLDNYAEQLF	1724	0.0225426		CSAGDTGVF	92	0.00131382		CSAVGGKCEQYF	78	0.00125804		CASSPGTNSYNSPLHF	109	0.00134601		CSAAGTTNTEVF	83	0.00128116		CSAGGDSPLHF	106	0.00136414		CRGGQTNTEVF	108	0.00151166		CASRRTGLNSDYTF	98	0.00123797		CASSGTGVNSGYTF	64	0.000814879
CASSLEDRGTGQLYF	2426	0.0328827		CASSETGLSAETLYF	1723	0.0225295		CASSQDWASAEPLYF	92	0.00131382		CGGDRSYEQYF	78	0.00125804		CAWSLTGGVYTEQF	109	0.00134601		CTRSAAPNTEVF	83	0.00128116		CASGQGQQATQYF	105	0.00135127		CSAELSERLF	108	0.00151166		CASSADRVNYAEQF	98	0.00123797		CASSQDGGEVSF	64	0.000814879
CASSLRQGVGQLYF	2425	0.0328691		CAWSPKDVSYNSPLYF	1716	0.022438		CAWSLPRGSNTGQPYF	92	0.00131382		CASGQDWGPQDTQYF	77	0.00124192		CASSQTGGVTEVF	109	0.00134601		CAGGDATGGASAETLYF	82	0.00126572		CASRGSSHEQYF	105	0.00135127		CSEGQANTGQLYF	107	0.00149766		CARRRTGPNSDYTF	98	0.00123797		CSQEGVGGRRSAETLYF	64	0.000814879
CASSFEGGVTEVF	2413	0.0327065		CASRTANTEVF	1712	0.0223857		CAWSLGVGNTPYF	91	0.00129954		CASRPTGGYNYAEQF	77	0.00124192		CASSPGTGGYERYF	109	0.00134601		CSAPGTDANTEVSF	82	0.00126572		CSTDGAEQF	105	0.00135127		CASSQDADWATGQLYF	107	0.00149766		CASSQDTGGNQDAQYF	98	0.00123797		CASSDTRDRDEQYF	64	0.000814879
CASGGGQGVAEQF	2406	0.0326116		CSAGLGEQDTLYF	1696	0.0221764		CSADPGTLYF	91	0.00129954		CASSPWDWGYAEQCF	77	0.00124192		CGAGQYNSPLYF	108	0.00133366		CASTDVGYEQYF	82	0.00126572		CSAGRDISYNSPLCF	105	0.00135127		CRPGQNYAKQF	107	0.00149766		CASGVDRVNYAEQF	98	0.00123797		CASSWDSHAEQF	63	0.000802146
CASSPLGGRSEQYF	2399	0.0325167		CASSDVQSEVF	1696	0.0221764		CASGPGTSSAETLYF	91	0.00129954		CASSPRTANTGQLYF	77	0.00124192		CSPTAAFSNERLF	108	0.00133366		CSAGGANTGQLYF	82	0.00126572		CAWSRAGANPGNTLYF	105	0.00135127		CAGSQERNSNERLF	107	0.00149766		CSETVSNEILF	97	0.00122534		CASGGRQSTRCLPQHCTCSLTGVNQAPLF	63	0.000802146
CASSLNWGESSYEQYF	2398	0.0325032		CASGEGPYEQYF	1689	0.0220849		CASSQGLGGSTETLYF	91	0.00129954		CTRSAEDIYNSPLYF	77	0.00124192		CASSDARGPSAETLHF	108	0.00133366		CANSQGFSDYTF	82	0.00126572		CANSQGQDTGQLYF	105	0.00135127		CASSLAGQF	107	0.00149766		CASSQGGTGVDT_YF	97	0.00122534		CTSSDARDRDEQYF	63	0.000802146
CASSQDKPWRDTQYF	2398	0.0325032		CSAGLGGQNTLYF	1688	0.0220718		CSVDLGRQNTLYF	91	0.00129954		CASSPDKTYKQYF	76	0.00122579		CSLGGWDTQYF	108	0.00133366		CSARTGNARLF	82	0.00126572		CASSPRGDTGRLYF	105	0.00135127		CASSHRGWVTGQLYF	107	0.00149766		CASSPQGPNSDYTF	97	0.00122534		CSAGHGANTGQLYF	63	0.000802146
CASGDENSDYTF	2396	0.0324761		CAWRQGAPGNTLYF	1676	0.0219149		CANMSQGRTLYCTCSADGLGGYAEQF	91	0.00129954		CASGEEGSNQAPLF	76	0.00122579		CASSPRWGSQNTLYF	108	0.00133366		CGASGGSAETLYF	82	0.00126572		CASSQGQQAAQYF	105	0.00135127		CNASRGQDTQYF	107	0.00149766		CASGHYEQCF	97	0.00122534		CASSHLGTEVF	63	0.000802146
CASSFGGDQDTQYF	2394	0.032449		CASSLGGLGAGNAEQF	1665	0.0217711		CSAGREAF	91	0.00129954		CSAPAEQF	76	0.00122579		CANGDRADYTF	108	0.00133366		CSDRPNSDYTF	82	0.00126572		CDNYEQYF	105	0.00135127		CSVERYNSPLYF	107	0.00149766		CAWSLGAFSNERLLF	97	0.00122534		CSAEQGANTGQLYF	63	0.000802146
CASGTIYAEQF	2390	0.0323947		CASSTDRGVNTEVF	1640	0.0214442		CSAGTGEALYF	91	0.00129954		CASSLETGAETLYF	76	0.00122579		CSARDPNYAEQF	108	0.00133366		CAGGDPGQGAEVF	82	0.00126572		CASGPSGNYEQYF	105	0.00135127		CASGQDWTGIDTQYF	107	0.00149766		CASSLEGQQVTQYF	97	0.00122534		CASSRIINQDTQYF	63	0.000802146
CASGDGGGRAEQF	2390	0.0323947		CASSFGASNTGQLYF	1635	0.0213788		CASSEGQRDTEVF	91	0.00129954		CASSATSAETPYF	76	0.00122579		CASGGGQGNYAERF	108	0.00133366		CSAAGTKFSDERLF	82	0.00126572		CTYSAVSQNTLYF	104	0.0013384		CRDNCEQYF	106	0.00148366		CVSGADRVNYAEQF	97	0.00122534		CTWSAGQGANTGQLYF	62	0.000789414
CASGDQVF	2390	0.0323947		CASSDPGQQDTQYF	1631	0.0213265		CSAGRYNSPLYF	90	0.00128526		CAGSERTKDTQYF	76	0.00122579		CSADQSGGSTQYF	108	0.00133366		CTRSARDTQYF	82	0.00126572		CASSPGDWWEQYF	104	0.0013384		CTIEIQSSKLTDSAVYFRASSQSGTQREYF	106	0.00148366		CSADRGAYEQYF	97	0.00122534		CTSGGPQGSNTEVF	62	0.000789414
CASRPTGENYAEQF	2382	0.0322863		CASSQDQDNYAEQF	1623	0.0212219		CTYSADRDSYNSPLYF	90	0.00128526		CASSLSHFSNEGLF	76	0.00122579		CSAGGATEVF	107	0.00132131		CSAGGQKNEGLF	82	0.00126572		CSADRANTGQLCF	104	0.0013384		CASSHLRGAYTEAF	106	0.00148366		CGAERQGTGQLYF	97	0.00122534		CASRGISCEQYF	62	0.000789414
CASGDAGGAYEQYF	2376	0.032205		CASSDRVQNTLYF	1591	0.0208035		CSADWGRDEGLF	90	0.00128526		CASSDAGHSPLYF	76	0.00122579		CSLEIQSSEAGDSALYLRASSQGQTNSDYTF	107	0.00132131		CTRRKQDTQYF	82	0.00126572		CVWSLRDNTGQLYF	104	0.0013384		CRLGGLAEQF	106	0.00148366		CSADSSGDTLYF	97	0.00122534		CASSQDTGGYAE_F	62	0.000789414
CASSPGHANSDYTF	2363	0.0320288		CASSLTGMSQNTLYF	1590	0.0207904		CTCSANRADEQYF	90	0.00128526		CSEQGRGTEVF	76	0.00122579		CASRRINTEVF	107	0.00132131		CASSHRDWGGAYERYF	81	0.00125029		CSGGTKTTLYF	104	0.0013384		CGETGPQDTQYF	106	0.00148366		CASSPAGTETLYF	97	0.00122534		CASSFPTGNTLYF	62	0.000789414
CASGDAVGSAETLYF	2358	0.031961		CASGGGQNTLYF	1586	0.0207381		CASGERQGNE_YF	90	0.00128526		CSADRAGGVETLYF	75	0.00120966		CSADEGDYAEQF	107	0.00132131		CASRTTNSDYTF	81	0.00125029		CANMSQGRTLYCTCLAGGYAEQF	104	0.0013384		CA_SLGTGDDTQYF	105	0.00146967		CASSPQRANSDYTF	96	0.0012127		CASSPSGTTNTEAF	62	0.000789414
CASGDGTGVYTGQLYF	2354	0.0319068		CASSQDGGGQNTLYF	1578	0.0206335		CASSDAGYEQYF	90	0.00128526		CSVDIANTEAF	75	0.00120966		CASSPGLGGRGAEQF	107	0.00132131		CASGDGQGE_YF	81	0.00125029		CSASGGHNQAQHF	104	0.0013384		CASSQAGGAEQF	105	0.00146967		CANSPAGAETLYF	96	0.0012127		CTSSQRGGRSYEQYF	62	0.000789414
CASSRPGQGSNERLF	2354	0.0319068		CASSPGTGGERLF	1569	0.0205158		CSADRIGSNERSF	90	0.00128526		CASGDSGTPNQDTQYF	75	0.00120966		CSAVGRGLDTQYF	107	0.00132131		CSATSTEVF	81	0.00125029		CAGSQGQQATQYF	104	0.0013384		CASSPGQDNSPLYF	105	0.00146967		CASSGTGGALGQYF	96	0.0012127		CASSDALNSDYAF	62	0.000789414
CAWSRPGRNSDYTF	2349	0.031839		CAWSLVQISNERLF	1561	0.0204112		CSADINTEAF	89	0.00127098		CSERDWGHQDAQYF	75	0.00120966		CSADRNAEVF	107	0.00132131		CASSLGDIFPNERLF	81	0.00125029		CASSQDRGSPYEQYF	104	0.0013384		CASSQGRNSNERLF	105	0.00146967		CASGADRNTGQLYF	96	0.0012127		CASSSTASNERLF	62	0.000789414
CASSLSRGFSNERLF	2346	0.0317983		CASSLSWSQDAQYF	1558	0.020372		CSAPGTDNNQAPLF	89	0.00127098		CASSLRGDGDTEVF	75	0.00120966		CASSQDNSGNTLYF	107	0.00132131		CASSHPQISNERLF	81	0.00125029		CSAGQDISYNSPLYF	103	0.00132553		CASSQSRDHYAAQF	105	0.00146967		CASSLSWGVQNTLCF	96	0.0012127		CASS_GQDFQRKIIF	62	0.000789414
CASSVGNTLYF	2341	0.0317306		CASGEDKEVF	1547	0.0202282		CSAAGGDAEVF	88	0.0012567		CGGVAEQF	75	0.00120966		CSASQGNYAEQF	107	0.00132131		CASSLGFSDYTF	81	0.00125029		CSVDGAEQF	103	0.00132553		CASSQERNPNERLF	105	0.00146967		CASSLGDREAF	96	0.0012127		CSADEGANTGQLYF	61	0.000776682
CASRTKYNSPLYF	2338	0.0316899		CASSFWGNYAEQF	1541	0.0201497		CASSDQSYAERF	88	0.0012567		CASSQDLSYDNQAPLF	75	0.00120966		CASSGPTNNNQAPPF	107	0.00132131		CTRSAGGQKNERLF	81	0.00125029		CSAGRDRNTEVF	103	0.00132553		CASSQSGDNNQDTQCF	105	0.00146967		CSLEIQSSEAGDSALYLRASSLRDNYAEQF	96	0.0012127		CASSQQGAYNSLLYF	61	0.000776682
CASSFRYAEQF	2337	0.0316764		CASSPGTGYAEQF	1539	0.0201236		CSAGDRFYGSTLYF	88	0.0012567		CASSPWNWGYAEQF	75	0.00120966		CSVGQRNSPLYF	106	0.00130896		CSADWGADTGQPYF	81	0.00125029		CSADYNSYDSPLYF	103	0.00132553		CASSQSRDDYAEQF	105	0.00146967		CASSDMDGCEQYF	96	0.0012127		CASSWDSYTEQF	61	0.000776682
CASRTGANTEVF	2335	0.0316492		CASSQQGTNERLF	1537	0.0200974		CSATNSGNTLHF	88	0.0012567		CSADQDWGGRQNTLYF	74	0.00119353		CAGSFRTNSDYTF	106	0.00130896		CSALGDSYAEQF	81	0.00125029		CASSPGTGTNEQYF	103	0.00132553		CSSRGQGSNERLF	105	0.00146967		CASSGDLHEQYF	96	0.0012127		CSASRGHNTLYF	61	0.000776682
CASSLVRDRRKTEVF	2330	0.0315815		CASGDARRIYEQYF	1492	0.019509		CANGDASNERLF	88	0.0012567		CSERGRDTEVF	74	0.00119353		CSLRGRDTQYF	106	0.00130896		CSVRDWGAEALYF	81	0.00125029		CSAVSQNTLHF	103	0.00132553		CASSQAGSQNTLYF	105	0.00146967		CASSTWGPQNALYF	95	0.00120007		CSLTWVNQAPLF	61	0.000776682
CASSPGTGEDTQYF	2326	0.0315273		CAWSSISNERLF	1486	0.0194305		CASSPRRDWGYEQYF	88	0.0012567		CSADRPGVSQNTLYF	74	0.00119353		CSVGLGNSAETLYF	106	0.00130896		CSAEGGGLGNTLYF	81	0.00125029		CSALPDRNTEVF	103	0.00132553		CAGSQSGTQREYF	105	0.00146967		CASSLEDSQDTLYF	95	0.00120007		CARSQQGAYNSPLYF	61	0.000776682
CASSDGEGSYEQYF	2317	0.0314053		CASSGASQGYEQYF	1471	0.0192344		CASGETGGSIEVF	88	0.0012567		CSAGQTRGAYEQYF	74	0.00119353		CSADRGQNALYF	106	0.00130896		CSAVSNSDYAF	80	0.00123485		CSERDWGGETLYF	103	0.00132553		CASSQSREHYAEQF	105	0.00146967		CASSLRGRGTGVF	95	0.00120007		CSSSGLGGTEQF	61	0.000776682
CASSLGQANTEVF	2300	0.0311748		CASSLALRWGSAETLYF	1446	0.0189075		CASGETGGAEVF	88	0.0012567		CAGHQNALYF	74	0.00119353		CASSQGAATEQYF	106	0.00130896		CSGTGGARYAEQF	80	0.00123485		CASSQEDRANTGQLYF	102	0.00131266		CVSSPGTGNTEVF	104	0.00145567		CSVDREQYF	95	0.00120007		CSLTVVNQAPLF	61	0.000776682
CASGGPSGTTNTEVF	2298	0.0311477		CASGPLGGRTAEQF	1436	0.0187768		CASGGADRATGQLYF	87	0.00124241		CASSLSHFSNEK_SF	74	0.00119353		CASSQGKTGVTEVF	106	0.00130896		CSAGPNTEVF	80	0.00123485		CSASGTGAE_F	102	0.00131266		CASSALQGWAETLHF	104	0.00145567		CSAGGWGDTQYF	95	0.00120007		CASSPGTGVNQAPLF	61	0.000776682
CASRAGTVYEQYF	2287	0.0309986		CASSFGLQDTQYF	1435	0.0187637		CASGDAFGGTSNERLF	87	0.00124241		CTWSADANNERLF	73	0.0011774		CTRSAVGDNQAPLF	106	0.00130896		CASRGASAETLYF	80	0.00123485		CSATGDSAETLCF	102	0.00131266		CSADPATNTEVF	104	0.00145567		CSADWGAHEQYF	95	0.00120007		CASGHWASAETLYF	61	0.000776682
CASRPGDQDTQYF	2286	0.0309851		CASREGGNYAEQF	1409	0.0184237		CTCSPGQSNTEVF	87	0.00124241		CASPAGTGYERLF	73	0.0011774		CSNPTGGPSQDTQYF	106	0.00130896		CAWSLGGSAEMLYF	80	0.00123485		CAWGEGEQYF	102	0.00131266		CASSGLGGGDTQYF	104	0.00145567		CSADKADTEVF	95	0.00120007		CANSQGGGRSYEQYF	60	0.000763949
CSAPGHFDSYNSPLYF	2284	0.030958		CASSSGQGGSGNTLYF	1403	0.0183453		CTRSAEGGGPSAETLYF	87	0.00124241		CASGEGQFSQNTLYF	73	0.0011774		CASSPGAGGYEQYF	105	0.00129661		CSADRDWGARLAEQF	80	0.00123485		CSSTGTGGGQNTLHF	102	0.00131266		CTSSADNYEQYF	104	0.00145567		CSAGDRGDTQYF	95	0.00120007		CASSFPDRGPTGQLCF	60	0.000763949
CASGTGTYAEQF	2279	0.0308902		CASSLGGYEQYF	1399	0.018293		CASSQGLGVSYGQYF	87	0.00124241		CSADRGGITEVLF	73	0.0011774		CASSQGRTNSDYTF	105	0.00129661		CTRSAPGLGASAETLYF	80	0.00123485		CSVDSGGNYAEQF	102	0.00131266		CSAAWGQAPLF	104	0.00145567		CASSDAGAGDAEQF	95	0.00120007		CASTSRGSDTEVF	60	0.000763949
CASGDVGANTEVF	2277	0.0308631		CASSSGLQDTQYF	1399	0.018293		CSAVRDSYNSPLYF	87	0.00124241		CTYSADRAGGAETLYF	73	0.0011774		CASSVTGGEVF	105	0.00129661		CSRDSPYAEQF	80	0.00123485		CAWSLRDNTGQLCF	101	0.00129979		CTWSLGTGDDTQYF	104	0.00145567		CASSQGGTGVDTRYF	95	0.00120007		CASSQGGGHSYEQYF	60	0.000763949
CASSPRLVSSYEQYF	2275	0.030836		CASGGGQNTEVF	1366	0.0178615		CSVGQGNTEAF	87	0.00124241		CVSSDEGDEQYF	73	0.0011774		CSADRANTEVF	105	0.00129661		CSAGQNSSPLYF	80	0.00123485		CSARGGGSETLYF	101	0.00129979		CAWSLGTGPQDTQYF	103	0.00144167		CSADWGAYEQCF	95	0.00120007		CVSGDATGGYAEQF	60	0.000763949
CASSDRGTGYEQYF	2274	0.0308224		CASSFKGTEVF	1364	0.0178353		CGADPETLYF	87	0.00124241		CAGSATSAETLYF	73	0.0011774		CASSRDGGVQDTQYF	105	0.00129661		CASSLGDIFSNERLLF	79	0.00121942		CASSQERGNSYEQYF	101	0.00129979		CASGQERNSNERLF	103	0.00144167		CASSQGGLQDTQCF	95	0.00120007		CASSLVGGALGQYF	60	0.000763949
CAWSPNTGQLYF	2270	0.0307682		CASSQDWDRAAEQF	1360	0.017783		CTCSAAQGNTEVF	87	0.00124241		CASSLDWAGSHEQYF	73	0.0011774		CSADRTGGSERYF	105	0.00129661		CTRSAGWGGANTGQLYF	79	0.00121942		CASSPGTGYYGQYF	101	0.00129979		CSAARETYVEQF	103	0.00144167		CASSQESGVQDTQYF	94	0.00118744		CSASRGQHTLYF	60	0.000763949
CASSFGTGGNYAEQF	2268	0.0307411		CASSDASRGYEQYF	1359	0.0177699		CASGDQLGGSAETPYF	87	0.00124241		CASGDTRAGEQYF	73	0.0011774		CASSVDRANTEVF	105	0.00129661		CASSPGTAYEQYF	79	0.00121942		CSAEALNQDTQCF	101	0.00129979		CSAEWYNSPLYF	103	0.00144167		CASGRQGPSQNTLYF	94	0.00118744		CSLTGLNQAPLF	60	0.000763949
CASGGTVNQDTQYF	2256	0.0305785		CAGSDASQGYEQYF	1357	0.0177438		CASGQDGGDTEVF	86	0.00122813		CSPDKTYEQYF	72	0.00116127		CTSTLGGGTGQPYF	105	0.00129661		CSATNTEVLF	79	0.00121942		CSASGGYNQAQRF	101	0.00129979		CRDNYE_YF	102	0.00142768		CASSRQGPGQNTLYF	94	0.00118744		CTCSAGVNTLYF	59	0.000751217
CASSEDTTEVF	2247	0.0304565		CASSLSWSQDTQYF	1353	0.0176915		CSAGRAERF	86	0.00122813		CASSAGTGYERSF	72	0.00116127		CSAGDSQSTLYF	105	0.00129661		CSAAGTANAEVF	79	0.00121942		CASGAEGANQDTQYF	101	0.00129979		CASSQDQNTEAF	102	0.00142768		CAGSLRDNYAEQF	94	0.00118744		CSASSGTTNTGQLYF	59	0.000751217
CASGEKNTEVF	2236	0.0303074		CASSRTGVYEQYF	1352	0.0176784		CSATQGNTEVF	86	0.00122813		CDARAVSNSDYTF	72	0.00116127		CASSPTGGSHEQYF	104	0.00128426		CASRTADSDYTF	79	0.00121942		CASSPTNAGQF	101	0.00129979		CASSPVAGQF	102	0.00142768		CSAGANAEVF	94	0.00118744		CASGDATGGCAEQF	59	0.000751217
CASSSSQDTQYF	2228	0.0301989		CASSLRQYEQYF	1350	0.0176522		CSALGADTQYF	86	0.00122813		CASSLGTTSSDYTF	72	0.00116127		CSADRFSYGQYF	104	0.00128426		CASSDANREVF	79	0.00121942		CSADGAVQF	101	0.00129979		CASSQSGTRREYF	102	0.00142768		CSLEIQSSEAGDSALYLRASSDTNSDYTF	94	0.00118744		CASSDATGGYAEQF	59	0.000751217
CASGPTGTNQDTQYF	2228	0.0301989		CASSSQGGNQAPLF	1345	0.0175869		CASGER_GNEQYF	86	0.00122813		CSADRLGVSQNTLHF	72	0.00116127		CSAPTEGGGAETLYF	104	0.00128426		CSGTGGGDAEQF	79	0.00121942		CSADWGSYEQCF	101	0.00129979		CTYSAEWGQAPLF	102	0.00142768		CASSPSSTEVF	94	0.00118744		CSTGVNTLYF	59	0.000751217
CASSLTTGGANTEVF	2226	0.0301718		CASSDASQGYGQYF	1344	0.0175738		CSSRRGLGQDTQYF	86	0.00122813		CASSPGQGSYEQYF	72	0.00116127		CASGQDGGAVAETLYF	104	0.00128426		CASSDATGGASAETLYF	79	0.00121942		CASSLGTGINEQYF	101	0.00129979		CTCRDNYEQYF	102	0.00142768		CASSDDWGGEERYF	94	0.00118744		CASSQDTEGYAEQF	59	0.000751217
CASSDDRQSNERLF	2220	0.0300905		CASRHGTVQDTQYF	1342	0.0175476		CTRSADWGIQDTQYF	86	0.00122813		CSADIANTEVF	72	0.00116127		CASSSRTNSDYTF	104	0.00128426		CSADRDNYAEQSF	78	0.00120398		CASSPGTGIDEQYF	101	0.00129979		CASSHPGQGSNERLLF	101	0.00141368		CASSLDRGDPGNTLYF	94	0.00118744		CASRDRGVF	58	0.000738484
CASGDGQFSNERLF	2213	0.0299956		CASRRDRNSDYTF	1335	0.0174561		CASSGLL_DTQYF	86	0.00122813		CASSSRTGGNYAEQF	71	0.00114514		CSADEGNYAERF	104	0.00128426		CSARTENERLF	78	0.00120398		CASRPLGGYAE_F	101	0.00129979		CASSQARGQNTLYF	101	0.00141368		CASSPRTGGPYEQYF	94	0.00118744		CASSQGGGRSYEQHF	58	0.000738484
CASSLGGAGNQAPLF	2202	0.0298465		CASSFISANTEVF	1333	0.01743		CASKDRVGNTPYF	86	0.00122813		CASSDAQ_RVASFTLQSSYEQYF	71	0.00114514		CSADTYERYF	103	0.00127191		CSAELSANTEAF	78	0.00120398		CSAFRDRNTEVF	100	0.00128692		CASSQSRDHNAEQF	101	0.00141368		CASRGRSQNTLYF	94	0.00118744		CVSGGPQGSNTEVF	58	0.000738484
CASSLNGNSDYTF	2195	0.0297517		CASSPTDQAPLF	1333	0.01743		CSAKGRGDEQYF	86	0.00122813		CAWSGGDRDTQYF	71	0.00114514		CAGSPGTNSYNSPLYF	103	0.00127191		CSDRGPNTGVF	78	0.00120398		CASSPGDWGGETLYF	100	0.00128692		CASSALQGWAGTLYF	101	0.00141368		CSAGADTEVF	94	0.00118744		CASGGPQRSNTEVF	58	0.000738484
CASSLYWGNQDTQYF	2188	0.0296568		CASSRDWGQDTQYF	1324	0.0173123		CAWSPPRGSNTGQLYF	86	0.00122813		CSADPNNERLF	71	0.00114514		CTALSNERLF	103	0.00127191		CASSQGTRNERLF	78	0.00120398		CAGSPGTGYYEQYF	100	0.00128692		CVSSQDADWAYAEQF	101	0.00141368		CSADWGGAAETLHF	93	0.00117481		CSRTINQDTQYF	58	0.000738484
CASGEQSNSDYTF	2184	0.0296026		CASSLRGPSYEQYF	1321	0.017273		CTRSAGQYTGQLYF	85	0.00121385		CASSAGTGYEK_SF	71	0.00114514		CSARDSNCAEQF	103	0.00127191		CASGDSGAGAETLYF	78	0.00120398		CTYLAGGYAEQF	100	0.00128692		CSASRGHDTQYF	101	0.00141368		CSADWGAYEQHF	93	0.00117481		CSGTGWTSAETLYF	58	0.000738484
CASSLGLGVNYAEQF	2179	0.0295348		CASSRLGGYEQYF	1306	0.0170769		CASSEGQGNTEVF	85	0.00121385		CASSDAGDSPLNF	71	0.00114514		CRVPGGVTEVF	103	0.00127191		CTRSADRANTEVF	78	0.00120398		CASSLRSDTEVF	100	0.00128692		CAGGGPGQGAEQF	101	0.00141368		CASSLGDRGVF	93	0.00117481		CASSQQGAYNLPLYF	58	0.000738484
CAWSPGGTEVF	2173	0.0294535		CASSLELGSQNTLYF	1269	0.0165931		CASSQGPNTEVF	85	0.00121385		CSVDRAGGAETLYF	71	0.00114514		CSADGADTEVF	103	0.00127191		CASSLGDILSNERLF	78	0.00120398		CSTDARDTLYF	100	0.00128692		CSAGLNERLF	101	0.00141368		CASGQDTINTGQLYF	93	0.00117481		CGDETGGVF	58	0.000738484
CASRPGYSYNSPLYF	2173	0.0294535		CASSQGGDEQYF	1261	0.0164885		CGADLGRQNTSYF	85	0.00121385		CASGGAGLGGRQNTLYF	71	0.00114514		CASGEGTGRDTQYF	103	0.00127191		CGAGQGQDTQYF	78	0.00120398		CSGTATTEVF	100	0.00128692		CTRSETGPQDTQYF	101	0.00141368		CSAGTGDTEVF	93	0.00117481		CASGDTNSDYIF	58	0.000738484
CASSQDGTGGYEQYF	2170	0.0294128		CASGDATENSDYTF	1260	0.0164754		CAWGQLGGAETLYF	85	0.00121385		CASSLGTGYERLF	71	0.00114514		CTRSADHWNSGNTLYF	102	0.00125957		CASSLGDTFSNERLF	78	0.00120398		CSGGTGGPRQLYF	100	0.00128692		CSAVAGGHERSF	101	0.00141368		CASS_SPGWTEVF	92	0.00116217		CASSFPTGGSYEQHF	58	0.000738484
CASTTGGARAEQF	2169	0.0293992		CASSIQGSGAETLYF	1254	0.016397		CASSPPRLQDTQYF	85	0.00121385		CSAGQTGGAYERYF	71	0.00114514		CASSLGTAISDYTF	102	0.00125957		CTRSAAGASYEQYF	78	0.00120398		CSVGRDISYNSPLYF	100	0.00128692		CTYSTGPDYTF	100	0.00139968		CGSRGGANTEVF	92	0.00116217		CAGSPSGTTNTEVF	58	0.000738484
CASSQDPGTGATEVF	2160	0.0292773		CASSSDWGSQDTQYF	1253	0.0163839		CASSDAQEDTEVF	85	0.00121385		CASSLRGDGNTEVLF	71	0.00114514		CASSGTGEEVF	102	0.00125957		CSAGQGQDAQYF	78	0.00120398		CSAEREEDSPLYF	99	0.00127405		CASSQERNSSERLF	100	0.00139968		CSAEGQRAQHF	92	0.00116217		CASSQEGGEVF	58	0.000738484
CASSSPGGNQDTQYF	2158	0.0292501		CASSLVTDYAEQF	1252	0.0163708		CASSQDGGDTEAF	85	0.00121385		CTYSADGRNTEVF	70	0.00112901		CASTGGVYAEQF	102	0.00125957		CTRSAELSANTEVF	78	0.00120398		CSARGGSPETLYF	99	0.00127405		CASSRESSAETLYF	100	0.00139968		CSAPHWGQDTHYF	92	0.00116217		CSADEGSYNSALYF	58	0.000738484
CASGQGIEVF	2147	0.029101		CASSLGTGEYEQYF	1246	0.0162924		CSGGTNDQAQHF	84	0.00119957		CTSSDALSGQGGSDYTF	70	0.00112901		CGGQGARATEVF	102	0.00125957		CSADAENTSYF	77	0.00118855		CASSQDPAGYEQYF	99	0.00127405		CSVLGGLAEQF	100	0.00139968		CASGDTINTGQLYF	92	0.00116217		CSPTASNERLF	58	0.000738484
CASSPDWGTSAETLYF	2142	0.0290333		CASSDSNNQAPLF	1244	0.0162662		CGAGQYNSPLYF	84	0.00119957		CSADRAGGAEVF	70	0.00112901		CASSQDKAGVTEVF	102	0.00125957		CRANDNPF	77	0.00118855		CASGQARGRSPLYF	99	0.00127405		CASSALQGWADTLYF	100	0.00139968		CASSDSLGGDAQYF	92	0.00116217		CASSGTGVDSDYTF	57	0.000725752
CASSSGTGVQDTQYF	2140	0.0290062		CASSQDWGNQDTQYF	1243	0.0162531		CASSDGRNTEIF	84	0.00119957		CSADRLGVSRNTLYF	70	0.00112901		CASSQGQTNSDYAF	102	0.00125957		CANMSQGRTLYCTCSAGQNNSPLYF	77	0.00118855		CSVEREENSPLYF	99	0.00127405		CASGAWTSQNTLYF	100	0.00139968		CASSLEDSQNALYF	92	0.00116217		CARSPGTGDYNNQAPLF	57	0.000725752
CASRSGTGSYEQYF	2139	0.0289926		CASSPGTGFTEVF	1241	0.016227		CASSDMGYEQYF	84	0.00119957		CAGGDAGGVQYF	70	0.00112901		CASSGGGNYAEQLF	102	0.00125957		CSVGRGGSNERLF	77	0.00118855		CSADWGSYEQHF	99	0.00127405		CSADQEAETLYF	100	0.00139968		CSAPHWGLQDTQYF	92	0.00116217		CASSQEGVGGRRSAETQYF	57	0.000725752
CAWSLSNSDYTF	2138	0.0289791		CASRGLGSQNTLYF	1241	0.016227		CTRSADPTKTSQNTLYF	84	0.00119957		CASSLSHFSNERSF	70	0.00112901		CASSLKTNSNTEVVF	102	0.00125957		CTRSADSQNTLYF	77	0.00118855		CASGGDTQAQHF	99	0.00127405		CSAEWGQTPLF	100	0.00139968		CANGDARNTGQLYF	92	0.00116217		CASGGR_SQNTLYF	57	0.000725752
CASSLSGGYAEQF	2133	0.0289113		CASSPGGALDTQYF	1237	0.0161747		CASSDWGDTQYF	84	0.00119957		CASSDAGDSPL-F	70	0.00112901		CSISSGNTLYF	102	0.00125957		CSARTTNEK_SF	77	0.00118855		CASSPTNAEQSF	99	0.00127405		CASSGGRGANSPLYF	100	0.00139968		CASSDMDGYEQHF	92	0.00116217		CASSLSDLNYAEQF	57	0.000725752
CASGDEGNYAEQF	2133	0.0289113		CASGQDGQGAQVF	1236	0.0161616		CSAVRDRNTGQLYF	84	0.00119957		CASSGTRYTEVF	70	0.00112901		CASRQVNTEVF	101	0.00124722		CTRSGDSPYAEQF	77	0.00118855		CSGLGQANTEVF	99	0.00127405		CSVDPAANTEVF	100	0.00139968		CGADIWGGGDTQYF	91	0.00114954		CASSGTGVNSDSTF	57	0.000725752
CASSGANSGNTLYF	2132	0.0288977		CASSLARANTEVF	1223	0.0159916		CASSEGQRSTEVF	84	0.00119957		CSADANTGQLYF	70	0.00112901		CRADTGAEQF	101	0.00124722		CASGGPGQGAEVF	77	0.00118855		CSTRQGADTEVF	99	0.00127405		CRGTPYE_YF	99	0.00138569		CASGHCEQYF	91	0.00114954		CTGSLTGVNQAPLF	57	0.000725752
CASSLAGQGAAEVF	2130	0.0288706		CASSYQGAPNERLF	1221	0.0159655		CASSQAVNQDAQYF	84	0.00119957		CSAYANNERLF	70	0.00112901		CGAEGGGEQYF	101	0.00124722		CNARTGNERLF	76	0.00117311		CASSQDGGPYAEQF	99	0.00127405		CASSQDAGWAYAEQF	99	0.00138569		CASSDAGTGPNSDYTF	91	0.00114954		CSAGVNPLYF	57	0.000725752
CASSGGTGGARNEQYF	2108	0.0285724		CASSFGKNTEVF	1211	0.0158347		CSRGGSNTGQLYF	84	0.00119957		CASSRDETYEQYF	70	0.00112901		CAGSGPTNNNQAPLF	101	0.00124722		CASSDVVYEQYF	76	0.00117311		CSAGRQGRNSPLYF	98	0.00126118		CASGWDRVYEQYF	99	0.00138569		CASSLGHPGNTLYF	91	0.00114954		CASGGLGGAEQF	57	0.000725752
CASSLETGGFYEQYF	2104	0.0285182		CASSLWGANYAEQF	1207	0.0157824		CSAAQRNTEVF	83	0.00118529		CTRSDWGYYAEQF	70	0.00112901		CASSPTGSNTEAF	101	0.00124722		CASSYDGGAETLYF	76	0.00117311		CSVTVNTEVF	98	0.00126118		CASARDHYAEQF	99	0.00138569		CASGLDRGANTGQLYF	91	0.00114954		CASNQDTGGYAEQF	57	0.000725752
CASSPGTGGVF	2100	0.028464		CASSLALLSSQNTLYF	1200	0.0156909		CTRSAGQTSAETLYF	83	0.00118529		CASSEGNNYAEQSF	70	0.00112901		CTRKPGLGDAEQF	101	0.00124722		CSADRDGQSTLYF	76	0.00117311		CSAAGGAGNSSLYF	98	0.00126118		CANMSQGRTLYCTCRGTPYEQYF	99	0.00138569		CASSAGTASGNTLHF	91	0.00114954		CASSQTINQDTQYF	57	0.000725752
CASSPSTNQDTQYF	2099	0.0284504		CASSPGQTNTEVF	1190	0.0155601		CASSPPGHNEGLF	83	0.00118529		CASSLRDWGYAEQF	70	0.00112901		CASSGTSTEVSF	101	0.00124722		CASSPTKGEGNSPLYF	76	0.00117311		CASSPGDWGEKYF	98	0.00126118		CTYSAEGAPLF	99	0.00138569		CANSPQGANSDYTF	91	0.00114954		CASRGREVF	56	0.000713019
CASSLSVNYAEQF	2094	0.0283827		CAWSRTPEVF	1188	0.015534		CSAEGQGAGQLHF	83	0.00118529		CASSLEGTAYAGQF	69	0.00111289		CASSFRTSSDYTF	101	0.00124722		CSGAGF	76	0.00117311		CASSPADWGEQYF	98	0.00126118		CVSGAWTGQNTLYF	98	0.00137169		CASSGDLYVQYF	91	0.00114954		CASSPTASNKRLF	56	0.000713019
CASGDEGTANSDYTF	2092	0.0283556		CASSFIQDTQYF	1182	0.0154555		CASGDGRPNTEVF	83	0.00118529		CASRSTGGYNHAEQF	69	0.00111289		CASSQGRGDTEVF	100	0.00123487		CSAEGGGFGDTLYF	76	0.00117311		CA_RRTFNNQAQHF	98	0.00126118		CAGSQDQNTEVF	98	0.00137169		CSLEIQSSEAGDSALYLRASSPDRVEQYF	91	0.00114954		CSATGRTSAETLYF	56	0.000713019
CASSSGQGNTEVF	2091	0.028342		CASSLRQGYEQYF	1179	0.0154163		CSADLGDQDTQHF	83	0.00118529		CASSLGANYAEQLF	69	0.00111289		CASSDARGPGAETLYF	100	0.00123487		CSAAGASYGQYF	76	0.00117311		CASSPGDWVEQYF	98	0.00126118		CSGDTEVF	98	0.00137169		CSAGANTEAF	91	0.00114954		CASSQ_DTQYF	56	0.000713019
CASSSRLGTYEQYF	2090	0.0283285		CASSVNQDTQYF	1169	0.0152855		CSADWGGTGQLYF	83	0.00118529		CASRGQGAEVF	69	0.00111289		CKPGLGGAEQF	100	0.00123487		CSTLGVQDTQYF	76	0.00117311		CVSSLRGDTEVF	97	0.00124831		CSGTPYEQYF	98	0.00137169		CSLEIQSSEAGDSALYLRASSLDRGANTGQLYF	91	0.00114954		CASSDVRDRDEQYF	56	0.000713019
CASSDGASGTGGEYEQYF	2090	0.0283285		CASSVGQGYAEQF	1166	0.0152463		CASSPSLGGRGAETLYF	83	0.00118529		CASSPWDWGYAEQVF	69	0.00111289		CASSFGTNSDYTF	100	0.00123487		CASSFHSYEQYF	76	0.00117311		CSGTANIEVF	97	0.00124831		CASSQESSAEALYF	98	0.00137169		CGAVAGGASAETLYF	91	0.00114954		CASRSGQEGTNVF	56	0.000713019
CASSLDSYEQYF	2090	0.0283285		CASSWGGEAEQF	1159	0.0151548		CSAGGLGQGTQYF	82	0.00117101		CAGSRDKTYEQYF	69	0.00111289		CASRDANNQAPLF	100	0.00123487		CASGDATGGASAEALYF	75	0.00115768		CASSQDLANT_VF	97	0.00124831		CSALGGLTEQF	98	0.00137169		CA_SRGARDTQYF	91	0.00114954		CASTSQGSGTEVF	56	0.000713019
CASGDSGGEQF	2083	0.0282336		CASSSYRDQDTQYF	1155	0.0151025		CSAIRDSNTGQLYF	82	0.00117101		CAGHQSTLYF	69	0.00111289		CSADGDRAPAEALYF	100	0.00123487		CSRGAFNTEVF	75	0.00115768		CASSQDWEEDAQYF	97	0.00124831		CASGQARSQNTLYF	98	0.00137169		CASSLDRGANAGQLYF	90	0.00113691		CASREISYEQYF	56	0.000713019
CASGVSNERLF	2082	0.02822		CSAGLGERNTLYF	1154	0.0150894		CSAGDTEVSF	82	0.00117101		CASRSTGGYNYAKQF	69	0.00111289		CSAGHNSYAEQF	100	0.00123487		CSAPSGTNYAEQLF	75	0.00115768		CSSTETGGGQNTLYF	97	0.00124831		CSADFGRNTRQLYF	97	0.00135769		CVSSGDLYEQYF	90	0.00113691		CASGSPQGSNTEVF	56	0.000713019
CASSDAGTGEVF	2082	0.02822		CASSAGQGYEQYF	1152	0.0150632		CASSQVSQNSQAPLF	82	0.00117101		CSADQDWGGWQNTSYF	69	0.00111289		CANMSQGRTLYCTCQGTENTEVF	100	0.00123487		CSASGGSAETLHF	75	0.00115768		CSTDSGGNYAEQF	97	0.00124831		CTSGAWTGQNTLYF	97	0.00135769		CASSQGGLRDTQYF	90	0.00113691		CASGGPQGSNTGVF	56	0.000713019
CASIGTGDYNSPLYF	2081	0.0282065		CASSPLGYEQYF	1147	0.0149979		CANMSQGRTLYCTCSADPETLYF	82	0.00117101		CSADTQGFNERLLF	69	0.00111289		CSAVASTGQLYF	100	0.00123487		CSADRASTEVF	75	0.00115768		CSAGRDISCNSPLYF	97	0.00124831		CASSQGSSAETLYF	97	0.00135769		CSAPGGADTGQLYF	90	0.00113691		CARGDETGGVF	56	0.000713019
CASGDTGGQDTQYF	2078	0.0281658		CASSQGSSYNSPLYF	1146	0.0149848		CASGPDWGNAEQF	82	0.00117101		CSADQDWGGWQNALYF	69	0.00111289		CASSPNPGNTPYF	100	0.00123487		CSAWGQGTQYF	75	0.00115768		CNGHTSQNTLYF	97	0.00124831		CASSALQG_AETLYF	97	0.00135769		CAWSPGAFSNERLF	90	0.00113691		CASSGLGGTEQGF	56	0.000713019
CGARVAGGEDTEVF	2077	0.0281522		CASSFRGPYAEQF	1145	0.0149717		CSADGPGGYAEQF	82	0.00117101		CASSLDKSYEQDF	68	0.00109676		CSAGHDNYAEQF	99	0.00122252		CASGDGLGGAETPYF	75	0.00115768		CASSPGDWGEQDF	97	0.00124831		CSGLGGGDTQCF	97	0.00135769		CASGGQNSYNSPPYF	90	0.00113691		CASSPTTSNERLF	56	0.000713019
CASGDAGDRAEQF	2077	0.0281522		CSAGPGEQNTLYF	1145	0.0149717		CSAEGEKSQNTSYF	82	0.00117101		CASSAGTGCERLF	68	0.00109676		CASGVPGRGPNTEVF	99	0.00122252		CASSTGTGVLNYAEQF	75	0.00115768		CASSQGHASTGQLYF	96	0.00123545		CSAEQYNSPLYF	97	0.00135769		CNARGGDTQYF	90	0.00113691		CASGHKASAETLYF	56	0.000713019
CASSPTGTGLNERLF	2075	0.0281251		CASRSGTGNAEQF	1142	0.0149325		CASGDNQGTYEQYF	82	0.00117101		CASSLSQNTLYF	67	0.00108063		CSAGGQGNSAETLYF	99	0.00122252		CSGGSPYAEQF	75	0.00115768		CASSQDPAGGHAE_F	96	0.00123545		CASSQPGTQREYF	97	0.00135769		CASSLSWGHEQYF	90	0.00113691		CSARLGGPSAETQYF	55	0.000700287
CASGDSGTGNSDYTF	2070	0.0280574		CASSLAGNQDTQYF	1139	0.0148933		CASSLDWGPSQNTLYF	82	0.00117101		CASSLDKSYEQ_F	67	0.00108063		CSAGDSQNTSYF	99	0.00122252		CSETGRQDTQYF	75	0.00115768		CASSQDHTSQNTLYF	96	0.00123545		CSADASSYE_YF	97	0.00135769		CASSPDGVEQYF	90	0.00113691		CASGWDSYAEQF	55	0.000700287
CASGEGSYEQYF	2066	0.0280031		CASSLGRRSGNTLYF	1135	0.014841		CSGWGGQNTLYF	82	0.00117101		CASTAGTGYERLF	67	0.00108063		CASSFRTNPDYTF	99	0.00122252		CASRTANSDCTF	75	0.00115768		CSVDARDTLYF	96	0.00123545		CASSYKGDSDYTF	96	0.0013437		CASSDGGNYAEQSF	90	0.00113691		CASGDRGTENAEVF	55	0.000700287
CASSDGTANTEVF	2065	0.0279896		CASSDASQGYERYF	1133	0.0148148		CASSQEREQYF	82	0.00117101		CSAVGGRYEQYF	67	0.00108063		CSASGGGQYF	99	0.00122252		CTRSADRDGQNTLYF	74	0.00114224		CSAAGGAGNSPF	96	0.00123545		CTYRGTPYEQYF	96	0.0013437		CSAERQGTGQLHF	90	0.00113691		CASSRTIDQDTQYF	55	0.000700287
CASGEMGTGNERLF	2060	0.0279218		CASSEGSSYEQYF	1125	0.0147102		CASSLDAGANTEAF	82	0.00117101		CASSQTGVQDTQYF	67	0.00108063		CTYSADQEAPLF	99	0.00122252		CGETGGQDTQYF	74	0.00114224		CASSQGQDTGQLCF	96	0.00123545		CASGVWTGQNTLYF	96	0.0013437		CASSPRDNYAEQF	90	0.00113691		CASSQEDTQYF	55	0.000700287
CASSPGQNYAEQF	2059	0.0279083		CASSPRDWGEGEQYF	1125	0.0147102		CGADLGDQDTQYF	81	0.00115673		CSAHANNERLF	67	0.00108063		CASSPGLLYEQYF	99	0.00122252		CSADSRNTLYF	74	0.00114224		CANSQEGQGEQYF	96	0.00123545		CASSLRDWGTSADTLYF	96	0.0013437		CASRRTGPTSDYTF	89	0.00112428		CASTSQGSDTEAF	55	0.000700287
CAAGGAETLYF	2053	0.0278269		CASSLGGSYAEQF	1094	0.0143049		CTCSADPETLYF	81	0.00115673		CSAEREQYF	67	0.00108063		CGAGGQGYEQYF	99	0.00122252		CSAPGGTSQNALYF	74	0.00114224		CSAAGSAGNSPLYF	96	0.00123545		CSADFGRNTGQF	96	0.0013437		CASSQDRALGGYEQYF	89	0.00112428		CASGDATGGYVEQF	55	0.000700287
CASGDAGGEDTQYF	2043	0.0276914		CASSSDRSQNTLYF	1092	0.0142787		CASGDASNKRLF	81	0.00115673		CSSSRTVTNTGQLYF	67	0.00108063		CASSVGQGAGNTLYF	99	0.00122252		CSETGGQGTQYF	74	0.00114224		CASSQDRDDQDTQYF	96	0.00123545		CSRDREVF	96	0.0013437		CASSLRTGGNTLCF	89	0.00112428		CASSRTGVNSDYTF	54	0.000687554
CASGVGTGGAHEQYF	2042	0.0276778		CASSLRNSDYTF	1079	0.0141087		CSGDWGSTLYF	81	0.00115673		CSADTRGFNERLF	67	0.00108063		CASSRQVYNSPLYF	99	0.00122252		CASSLDLPGLGGYERYF	74	0.00114224		CSAPGADAEPF	96	0.00123545		CASSQERNSNERLLF	96	0.0013437		CSADTGGNPPLYF	89	0.00112428		CSGQHQDTQYF	54	0.000687554
CASGDDRDRDYAEQF	2028	0.0274881		CASSPGTKDTQYF	1074	0.0140433		CSAGWGRDERLF	81	0.00115673		CASGDRGADYAEQF	67	0.00108063		CAWSPTGGVYAEQF	99	0.00122252		CSAPPGTNYAEQF	74	0.00114224		CA_SLRDNTGQLYF	96	0.00123545		CASSTTLNSDYTF	96	0.0013437		CASSLGDGEVF	89	0.00112428		CASSDARDRDE_YF	54	0.000687554
CASGDAGRAERLF	2024	0.0274339		CASSSGTGDYEQYF	1073	0.0140303		CASGGAFGGISNERLF	81	0.00115673		CSGDKNTEAF	67	0.00108063		CASSAGQRAGNTLYF	99	0.00122252		CASSALGATGQLYF	74	0.00114224		CANMSQGRTLYCTCSAEGANQDTQYF	96	0.00123545		CTYSAVAGGHERLF	96	0.0013437		CASGDGANAEVF	89	0.00112428		CASSQQGAYNSPF	54	0.000687554
CASSPTGAFYAEQF	2015	0.0273119		CASSLEGATNTGQLYF	1070	0.013991		CSADGSANTEVLF	81	0.00115673		CASSQPGHHYNSPLYF	66	0.0010645		CASSRTGYERYF	98	0.00121017		CALGDNYAEQF	74	0.00114224		CVSSGDTQAQHF	96	0.00123545		CSAAREIYAEQF	96	0.0013437		CSLEIQSSEAGDSALYLRASSLDRGDSGNTLYF	89	0.00112428		CASGDRGTENTGVF	54	0.000687554
CASSDGDRNTEVF	2013	0.0272848		CASSLYAEQF	1068	0.0139649		CTSRAGTYNNQAPPF	81	0.00115673		CASSGTNSDYTF	66	0.0010645		CASSGTGGAGSPLYF	98	0.00121017		CASSQGQSNQAPLF	74	0.00114224		CTYSASGTGAEQF	95	0.00122258		CSADSGRNTGQLYF	96	0.0013437		CASSLVGQQDTQYF	89	0.00112428		CASGHRASTETLYF	54	0.000687554
CASSLSPENTLYF	2012	0.0272712		CASSLEGRVTEVF	1064	0.0139126		CASSPPDSGNTLYF	80	0.00114245		CASSLLPGTNSDYTF	66	0.0010645		CGADRFSYEQYF	98	0.00121017		CASSQGLDSSYEQYF	74	0.00114224		CASRGQDYAEQF	95	0.00122258		CASSHPRGAYTEVF	96	0.0013437		CASSIRDRNSYEQYF	89	0.00112428		CASSPGTGGYNNQAPPF	54	0.000687554
CASSLGATNERLF	2000	0.0271086		CASGDAGTGGGENTLYF	1062	0.0138864		CSAGQASAETLYF	80	0.00114245		CASGDARGNYAEQSF	66	0.0010645		CSFSGAGSYEQYF	98	0.00121017		CASGHREGDTEVF	73	0.0011268		CASSPGQGNQGTQYF	95	0.00122258		CSSRGLFFNERLF	96	0.0013437		CASSDTSSDYTF	89	0.00112428		CSRTGVNQAPLF	54	0.000687554
CASSPNWGVSYEQYF	1998	0.0270815		CASSPTGGPSSAETLYF	1061	0.0138734		CSRRGYAEQLF	80	0.00114245		CASSLSHFPNERLF	66	0.0010645		CSATGVGGDTLYF	98	0.00121017		CTRSATNTEVF	73	0.0011268		CTSSPGTGYYEQYF	95	0.00122258		CSLEDGGAQDTQYF	96	0.0013437		CAGSQGQGQVF	89	0.00112428		CANGHRASAETLYF	54	0.000687554
CASSPGLYNSPLYF	1998	0.0270815		CASSSRTGNYAEQF	1061	0.0138734		CSAGWGIQDTQYF	80	0.00114245		CASSPDKPYEQYF	66	0.0010645		CSAVGDDQAPLF	98	0.00121017		CASSDLGGNYAERF	73	0.0011268		CASSPANAEQF	95	0.00122258		CSADLAANTEVF	96	0.0013437		CASGPTTSTGQLYF	89	0.00112428		CSHPGTEVF	54	0.000687554
CASSWGREGSDYTF	1995	0.0270408		CASSLTGAQDTQYF	1060	0.0138603		CSSRDRDSYGQYF	80	0.00114245		CASGTGAEQLF	66	0.0010645		CASGDRDQDTQYF	98	0.00121017		CTRSAERVEEVF	73	0.0011268		CASSQGQDTG_LYF	95	0.00122258		CTSSTRSQNTLYF	96	0.0013437		CSADPEHNTLYF	89	0.00112428		CASS_GQYF	54	0.000687554
CASSPQSSGNTLYF	1991	0.0269866		CASSLSWGGARQNTLYF	1060	0.0138603		CASSQDYHWGYERYF	80	0.00114245		CASSPGQNFSNGRLF	66	0.0010645		CSTGTGVNQAPLF	98	0.00121017		CAGDRGSTEAF	73	0.0011268		CSAGRDISYNPPLYF	95	0.00122258		CSVVGDEQYF	96	0.0013437		CAGSQDVGARAEQF	89	0.00112428		CSSDEGSYNSPLYF	54	0.000687554
CAWSLLDRVNSDYTF	1989	0.0269595		CASSFDYNQAPLF	1054	0.0137818		CASSDAQRDTEVF	79	0.00112817		CASSSSNEGLF	66	0.0010645		CASSQDRTGVTEVF	97	0.00119782		CASSQDQGNSPPYF	73	0.0011268		CSGPRQANTEVF	95	0.00122258		CTYRDNYEQYF	95	0.0013297		CASSLDRGDSGNTLNF	88	0.00111165		CASSLVGGAPEQYF	54	0.000687554
CASSPRGNYAEQF	1978	0.0268104		CSADQGAEVF	1050	0.0137295		CTYSATKDTQYF	79	0.00112817		CASSGSYNSPLHF	65	0.00104837		CASSFGAGGAGSPLYF	97	0.00119782		CSAGGTNTGQPYF	73	0.0011268		CSADGVEQF	94	0.00120971		CASSGINQDIQYF	95	0.0013297		CASGADRVNCAEQF	88	0.00111165		CARSQQDTQYF	54	0.000687554
CASKRGDEQYF	1975	0.0267697		CSAGLGEQNTLCF	1038	0.0135726		CSAGASQDTRYF	79	0.00112817		CSADRGGTTEVF	65	0.00104837		CSAPTGGGGAEALYF	97	0.00119782		CSADGQNTLYF	73	0.0011268		CASSQDRGGSYEQYF	94	0.00120971		CTYSAVGDEQYF	95	0.0013297		CSPDRVEQYF	88	0.00111165		CAGSLVGGALEQYF	54	0.000687554
CASSPQGASQNTLYF	1974	0.0267562		CATSGTRNTEVF	1037	0.0135595		CASSHGLGVSYEQYF	79	0.00112817		CSAGRPSAETLYF	65	0.00104837		CSAEGAAEVF	97	0.00119782		CASSWGEQYF	73	0.0011268		CANSQDLAGYEQYF	94	0.00120971		CASSRPGQGSNERLF	95	0.0013297		CASSPDRDGNALYF	88	0.00111165		CSSQQDTQYF	54	0.000687554
CASSPGTNNSPLYF	1972	0.026729		CASSFLTGGDEQYF	1014	0.0132588		CSASGTGGAEVF	79	0.00112817		CSADRVGGAETLYF	65	0.00104837		CSVGQYNSPLYF	97	0.00119782		CSSGKDTQYF	73	0.0011268		CSAERGENSPLYF	94	0.00120971		CASSHATNSDYTF	95	0.0013297		CASSLRGRSTEVF	88	0.00111165		CTFSADEGSYNSPLYF	54	0.000687554
CASSLRGEVF	1961	0.0265799		CASSFLGDYEQYF	1007	0.0131673		CASGDARYEQYF	79	0.00112817		CSAEGRNTEVF	65	0.00104837		CASGPDRDNSPLYF	97	0.00119782		CAWSLGSSAETLYF	73	0.0011268		CAGSQDLAGYEQYF	93	0.00119684		CASSQERNSNGRLF	95	0.0013297		CASSDGGNYAGQF	88	0.00111165		CASRDGEVF	54	0.000687554
CASGERQGAGNQAPLF	1957	0.0265257		CASSLGSVGTEVF	1005	0.0131411		CTRSGDRISNERLF	79	0.00112817		CSADEGQGAGNTPYF	65	0.00104837		CSATGGAYERYF	97	0.00119782		CSADSFNSGNTLYF	73	0.0011268		CASSQGQDTGQF	93	0.00119684		CASSPGQGSNERLF	95	0.0013297		CASGGGWGANTGQLYF	88	0.00111165		CATSLWYYEQYF	53	0.000674822
CASSLVLGGLGAETLYF	1955	0.0264986		CASSFMDWGYEQYF	1000	0.0130757		CAWGLDREVF	79	0.00112817		CASGEDNANSDYAF	65	0.00104837		CSADRFSHEQYF	97	0.00119782		CGADWGASEQYF	73	0.0011268		CSQGQDTGQLYF	93	0.00119684		CRETPYEQYF	95	0.0013297		CASSDGFTLHF	88	0.00111165		CASGDKTGGVF	53	0.000674822
CASSDETGSSYEQYF	1947	0.0263902		CASSLIRGAEQF	995	0.0130104		CSAKGQGDERYF	79	0.00112817		CASSDGQRYF	65	0.00104837		CASSRDKTGVTEVF	97	0.00119782		CSAGGQKNERLLF	73	0.0011268		CASRPLRGYAEQF	93	0.00119684		CSVDQYNAETLYF	95	0.0013297		CSAPHWGAYEQYF	87	0.00109901		CASGDINSDYTF	53	0.000674822
CASSSTGPSNTEVF	1924	0.0260784		CASSRQGNNQAPLF	994	0.0129973		CSAGASQDTQCF	79	0.00112817		CASSWTGGSDYTF	65	0.00104837		CRAVGDQDTQYF	97	0.00119782		CAWRRQGLSQNTSYF	72	0.00111137		CASSQEGAVF	93	0.00119684		CASGPVAEQF	95	0.0013297		CGAVGTNSDYTF	87	0.00109901		CASRQQGAYNSPLYF	53	0.000674822
CASGDRGQGYNSPLYF	1915	0.0259565		CASSLGASNYAEQF	993	0.0129842		CTRSAGGQANTEVF	79	0.00112817		CASSQERTSAETLYF	65	0.00104837		CGARGTEVF	97	0.00119782		CASSVRPNSDYTF	72	0.00111137		CASSQGWGAPNTGQLYF	93	0.00119684		CASSQERDSNERLF	95	0.0013297		CASSQDTGCLAPSAGHCTCSETVSNERLF	87	0.00109901		CTSGHRASAETLYF	53	0.000674822
CASSAPMTGGSYEQYF	1909	0.0258751		CASSDEDNSDYTF	990	0.012945		CASDERQGNEQYF	79	0.00112817		CAGSPGGGSEQYF	65	0.00104837		CAGSDVGEVF	97	0.00119782		CASSSPGANSDHTF	72	0.00111137		CSAPGAEAEQF	93	0.00119684		CSAGFGRNTGQLYF	95	0.0013297		CASRGQSRNTLYF	87	0.00109901		CSARLGGPSAEPLYF	53	0.000674822
CASGDPGTGVSNERLF	1895	0.0256854		CASKAGGNSDYTF	981	0.0128273		CASSLGLGGYAEQF	78	0.00111389		CSEQGRDTEAF	65	0.00104837		CKPGPGDAEQF	97	0.00119782		CSAGTNTGQPYF	72	0.00111137		CASSQEQGNSYGQYF	93	0.00119684		CASSQSPGMVYEQYF	95	0.0013297		CAGSGLGGTEQF	87	0.00109901		CSGTGRTSADTLYF	53	0.000674822
CASGEPGLGGYEQYF	1887	0.0255769		CASSLGDRGNTLYF	976	0.0127619		CSAAQGNTKVF	78	0.00111389		CSAVNQDTRYF	65	0.00104837		CASSQDKTGVTEVLF	97	0.00119782		CSAEGGQGTTEVF	72	0.00111137		CSARHNSPLYF	92	0.00118397		CASSQDTDWAYAEQF	94	0.0013157		CSLEIQSSEAGDSALYLRASSPSNTEVF	87	0.00109901		CSGQNQATQYF	53	0.000674822
CASGDSFSNERLF	1887	0.0255769		CASSWGGGAETLYF	966	0.0126312		CASGDGTGGAEQLF	78	0.00111389		CASSFDKSYEQYF	65	0.00104837		CAGSPDWGGYEQYF	97	0.00119782		CASSYGTGDSDYTF	72	0.00111137		CASGPTNAEQF	92	0.00118397		CSAGTVCAEQF	94	0.0013157		CSAPHWGGAAETLYF	87	0.00109901		CASSQ_GAYNSPLYF	53	0.000674822
CASSLGHYAEQF	1872	0.0253736		CASSLDRGRAEQF	964	0.012605		CSGQGAETLYF	78	0.00111389		CSGDRPYEQYF	65	0.00104837		CASSGTGETLYF	96	0.00118547		CTRSAWGQDTQYF	72	0.00111137		CASSQGDWGEQYF	92	0.00118397		CSAAETGVAEQF	94	0.0013157		CSVDRADTEVF	87	0.00109901		CACRQHYAEQF	53	0.000674822
CASSQKNSDYTF	1866	0.0252923		CASSLTFYAEQF	963	0.0125919		CSADSLGGYAEQF	78	0.00111389		CASNQDLSYNNQAPLF	64	0.00103224		CANMSQGRTLYCTCSGDNSQNTLYF	96	0.00118547		CSRGTLNTEVF	72	0.00111137		CASGGQNYAEQF	92	0.00118397		CAWSLGTRDDTQYF	94	0.0013157		CASGDGWGANTGQLHF	87	0.00109901		CANSDARDRDEQYF	53	0.000674822
CASSSEQDTQYF	1866	0.0252923		CASSLVSKYEQYF	953	0.0124612		CASSQVSQSNQAPLF	78	0.00111389		CASSHAGDSPLYF	64	0.00103224		CASGQGQTNSDYTF	96	0.00118547		CSALGGNYAEQF	72	0.00111137		CRADARDTLYF	92	0.00118397		CASRGQDTQYF	94	0.0013157		CASSTWGPQNTLCF	87	0.00109901		CTSSASRGQNTLYF	53	0.000674822
CASGGRTANSDYTF	1866	0.0252923		CASSLRGAGSDYTF	951	0.012435		CAGSQGLNTEVF	78	0.00111389		CASSGTGHTEVF	64	0.00103224		CSAVDRGPDTQYF	96	0.00118547		CSALGDNYAGQF	72	0.00111137		CSAEAFNQDTQYF	92	0.00118397		CASSLWDWGTSAETLYF	94	0.0013157		CASRGQSQDTLYF	87	0.00109901		CSAGVNTWYF	53	0.000674822
CASSLELQNQNTLYF	1841	0.0249534		CSAGTASRNTLYF	950	0.0124219		CASSQGPGGTRSSYEQYF	78	0.00111389		CASSDAADSPLYF	64	0.00103224		CASSPQGRNTGQLYF	96	0.00118547		CSVRDWGAETPYF	72	0.00111137		CASSQGQQATQCF	92	0.00118397		CASSPRQFSNERLF	94	0.0013157		CSADWGASTGVF	87	0.00109901		CASGGRQSQNILYF	53	0.000674822
CASGRLGGQDTQYF	1835	0.0248721		CASSFDNSYEQYF	942	0.0123173		CTRSADRGGGYEQYF	77	0.00109961		CASSDARRGVF	64	0.00103224		CMALPNERLF	96	0.00118547		CRRDIDSDYTF	72	0.00111137		CASGQDWGAPNTGQLYF	92	0.00118397		CSALGGETLYF	94	0.0013157		CASGQGQGQVF	87	0.00109901		CASGDETGGEVF	52	0.000662089
CASGDEGLANERLF	1830	0.0248043		CASLSGTGNQAPLF	939	0.0122781		CAPGQPLSNERLF	77	0.00109961		CTRSADRPSAETLYF	64	0.00103224		CASSQSSYEQYF	96	0.00118547		CSAGAQPNSDYTF	72	0.00111137		CSVGDNYEQYF	92	0.00118397		CTYSADASSYEQYF	94	0.0013157		CANMSQGRTLYCTCSAPHWGQDTQYF	87	0.00109901		CASSPSGTTNAEVF	52	0.000662089
CASSPGTGRSDYTF	1818	0.0246417		CASSPTQSYEQYF	936	0.0122389		CASGEGQRNTEVF	77	0.00109961		CSAEDIYNSPPYF	64	0.00103224		CSGDNSQTTLYF	96	0.00118547		CTRSGTGGPSAETLYF	72	0.00111137		CSADTRDTLYF	91	0.0011711		CASSLRDWGTSAETL_F	94	0.0013157		CGAGRNSPLYF	87	0.00109901		CGGRQSQNTLYF	52	0.000662089
CASGEGQSQDTQYF	1817	0.0246281		CASSLGDRGSDYTF	934	0.0122127		CSATKDTLYF	77	0.00109961		CAGSPGGNSDYTF	64	0.00103224		CASSLSTVNERLF	95	0.00117312		CATSDVGYEQYF	72	0.00111137		CSASGTGVEQF	91	0.0011711		CAGSQARSQNTLYF	94	0.0013157		CASSLRDNYAEQSF	87	0.00109901		CASSQQGAYTSPLYF	52	0.000662089
CASSGTGGGAEQF	1815	0.024601		CASSPRLGGRVNTLYF	934	0.0122127		CSGDGISNERLF	77	0.00109961		CAWTWGVNYAEQLF	64	0.00103224		CASSQGGREQCF	95	0.00117312		CAWNLGGSAETLYF	71	0.00109593		CASSQGQNTGQLYF	91	0.0011711		CSAEEAPLF	93	0.00130171		CASRDDWGGEEQYF	86	0.00108638		CASSLLYYEQYF	52	0.000662089
CASGDPGSSAETLYF	1813	0.0245739		CASSLEDNYAEQF	930	0.0121604		CSAGDEGLF	77	0.00109961		CASSDAVDSPLYF	64	0.00103224		CAPRDTNNQAPLF	95	0.00117312		CASGDF	71	0.00109593		CASSQGQDIGQLYF	91	0.0011711		CASGHLRGAYTEVF	93	0.00130171		CASSQGPVANTEVLF	86	0.00108638		CASSQGGRRSYEQYF	52	0.000662089
CASSPDRANERLF	1812	0.0245604		CASSLGLGGPETLYF	929	0.0121474		CSTTKDTQYF	77	0.00109961		CRLRDRGGSDYTF	64	0.00103224		CSADGGQNTLYF	95	0.00117312		CTCSASGGSAETLYF	71	0.00109593		CASRGLGGDEQF	91	0.0011711		CASRDWDKEVF	93	0.00130171		CTWSETVSNERLF	86	0.00108638		CVSSHPGTEVF	52	0.000662089
CASGDDGQGNSDYTF	1806	0.024479		CASSPPNSDYTF	926	0.0121081		CSAEGQGDEQYF	77	0.00109961		CASSLDKRYEQYF	64	0.00103224		CASSDRTGGAYEQYF	95	0.00117312		CSAGDGQNTLYF	71	0.00109593		CSKRDWGSETLYF	91	0.0011711		CTIEIQSSKLTDSAVYFGASSQSRDHYAEQF	93	0.00130171		CAGSPDRVEQYF	86	0.00108638		CASSFPTGGSYGQYF	52	0.000662089
CASSLFRDEQYF	1793	0.0243028		CASNSLGDSYEQYF	926	0.0121081		CSVTKDTQYF	77	0.00109961		CSADRTGGAETLYF	64	0.00103224		CSAGHNNYAE_F	95	0.00117312		CSAGDSQDTLYF	71	0.00109593		CSASEGYNQAQHF	91	0.0011711		CAWSHWGNCAEQF	93	0.00130171		CASSQGTINQDTQYF	86	0.00108638		CANMSQGRTLYCTCSADEGSYNSPLYF	52	0.000662089
CASSTGTDSENTLYF	1780	0.0241266		CASSLAGLSYEQYF	919	0.0120166		CASSQGWASAETLYF	77	0.00109961		CASSAGTKNALYF	64	0.00103224		CASSGTPTEVF	95	0.00117312		CASSLLGNQDAQYF	71	0.00109593		CTYSADGAEQF	91	0.0011711		CASGALGGRGEQCF	93	0.00130171		CASSLEDASTEVF	86	0.00108638		CASSPTVSNERLF	52	0.000662089
CASSFPRQGAEQF	1779	0.0241131		CASSLVGLGNTLYF	914	0.0119512		CAGSQDWASAETLYF	77	0.00109961		CTRSADHGGTEVF	64	0.00103224		CASSWGGSGNTLYF	95	0.00117312		CASSLNGAQDTQYF	71	0.00109593		CTRSAGKAGNTLYF	91	0.0011711		CASSHPGQGSNERSF	93	0.00130171		CVSGDGWGANTGQLYF	86	0.00108638		CTGSARNQAPLF	52	0.000662089
CASGDAGQSQNTLYF	1777	0.024086		CASSLAGNTEVF	913	0.0119381		CASRRANTGQLYF	76	0.00108533		CASSLFGWQDPQYF	64	0.00103224		CSAAQNTEVLF	95	0.00117312		CSAKTGNERLF	71	0.00109593		CSNRQGNTEVF	91	0.0011711		CSADQRAETLYF	93	0.00130171		CSAPHWGQDTQSF	86	0.00108638		CASSLWYYEQDF	51	0.000649357
CASGDPGADQAPLF	1773	0.0240317		CSARLGEQNTLYF	909	0.0118858		CSAVRNSNTGQLYF	76	0.00108533		CASSFRDGGYAEQF	64	0.00103224		CASSPGGRQNTLYF	94	0.00116078		CARTGNERLF	71	0.00109593		CSKRD_GGETLYF	91	0.0011711		CSAEPNERLF	92	0.00128771		CASSPADAETLYF	86	0.00108638		CVSSPGTGDYNNQAPLF	51	0.000649357
CASSLTGTSAETLYF	1772	0.0240182		CASSGTANTEVF	904	0.0118205		CSAEGGGPSAETLHF	76	0.00108533		CASSRTGAQDTQYF	64	0.00103224		CAGSLDRIYAEQF	94	0.00116078		CGAGGQKNERLF	71	0.00109593		CSAEGANQDTRYF	91	0.0011711		CASSRARGAEQF	92	0.00128771		CASTDSRNTLYF	86	0.00108638		CTCSGQNQDTQYF	51	0.000649357
CASSSPGPVTEVF	1763	0.0238962		CASSLGTRGEQYF	902	0.0117943		CSPTGNTLYF	76	0.00108533		CASSQDWWGQNTLYF	64	0.00103224		CSADEGNYAE_F	94	0.00116078		CSADRNPGNTLYF	71	0.00109593		CSLPGRDNQAQHF	91	0.0011711		CASSPSRDHYAEQF	92	0.00128771		CASSYRERNSDYTF	86	0.00108638		CTSSARNQAPLF	51	0.000649357
CASSWGGGYAEQF	1761	0.0238691		CASSPSKEVF	900	0.0117682		CTRSAGLGGREQYF	76	0.00108533		CASSLSHFSSERLF	63	0.00101611		CASSLDRIYAEQSF	94	0.00116078		CSADWGAGTGQLYF	71	0.00109593		CSADSEGNYAEQF	90	0.00115823		CASSALGGLAEQF	92	0.00128771		CSLEIQSSEAGDSALYLRASSLGDREVF	86	0.00108638		CASSLWNYEQYF	51	0.000649357
CASSSPGGGNERLF	1759	0.023842		CASRGQPNERLF	894	0.0116897		CTYSAAQGNTEVF	76	0.00108533		CSADRAGGAETLCF	63	0.00101611		CRGSGGVTEVF	94	0.00116078		CSADGDGQNTLYF	71	0.00109593		CSAAGGAGNSPLHF	90	0.00115823		CRAEWGQAPLF	92	0.00128771		CASSPDRGHGTEVLF	86	0.00108638		CSAGLGANTGQLYF	51	0.000649357
CASSLQGANTEVF	1736	0.0235302		CASSLDGGAPEQYF	893	0.0116766		CAWSLD_GGIDTQYF	76	0.00108533		CASSLGGRAGTLYF	63	0.00101611		CASSDDRTGLSE_F	94	0.00116078		CSAESVYEQYF	71	0.00109593		CASSRGQQATQYF	90	0.00115823		CASSGGQGRDTEVF	92	0.00128771		CAGSLGDRNYAEQF	86	0.00108638		CSLTGVNQARLF	51	0.000649357
CASGDAGGENTLYF	1735	0.0235167		CASSFWGGYAEQF	891	0.0116505		CASGDTGGSTEVF	76	0.00108533		CASGTGAEQSF	63	0.00101611		CASSQRLANTEVF	94	0.00116078		CSAERGQGATEVF	71	0.00109593		CAWSEGGQYF	90	0.00115823		CASSHQDWATGQLYF	92	0.00128771		CAGSLGSDYTF	86	0.00108638		CASSPRTGDYNNQAPLF	51	0.000649357
CASGDATGTYNSPLYF	1721	0.0233269		CASGDASQGYEQYF	886	0.0115851		CSAGTGGVNYAEQF	76	0.00108533		CAGRQNTLYF	63	0.00101611		CGAEGQDTQYF	94	0.00116078		CSVRQGGSNERLF	71	0.00109593		CASSPGTGVNEQYF	90	0.00115823		CTYSADPAANTEVF	92	0.00128771		CASSLSWGVQNPLYF	86	0.00108638		CASSPTAFNERLF	51	0.000649357
CASRHDWDQNTLYF	1719	0.0232998		CASSRLGDNQDTQYF	879	0.0114936		CSPQGISNDRLF	76	0.00108533		CASSQETGGTTGQL_F	63	0.00101611		CAGSQARDRYAEQF	94	0.00116078		CSAGGASAETPYF	70	0.0010805		CSGTGDEQYF	90	0.00115823		CASSHLGGAYTEVF	92	0.00128771		CTIEIQSSKLTDSAVYFRASSQSPGWTEVF	86	0.00108638		CTSSQGGGRSCEQYF	51	0.000649357
CASRDSNQDTQYF	1717	0.0232727		CASSLAGVQDTQYF	878	0.0114805		CASGRQGDFGNTPYF	76	0.00108533		CASSWTGASAETPYF	63	0.00101611		CSADLGRNEQYF	94	0.00116078		CSDRGPDTEVF	70	0.0010805		CSALRNRNTEVF	90	0.00115823		CSVDASSYEQYF	91	0.00127371		CASSQSPGWTEAF	86	0.00108638		CANGDRGTENTEVF	51	0.000649357
CASSQGHNSDYTF	1717	0.0232727		CSVGLGEQNTLYF	877	0.0114674		CASGDAQYERYF	76	0.00108533		CAGSQDWGPQDTQYF	63	0.00101611		CAGSEPTNNNQAPLF	93	0.00114843		CASSRGQNNQAPLF	70	0.0010805		CAGSQEGQGEQYF	90	0.00115823		CTSSASRGQDTQYF	91	0.00127371		CSARGRDTQYF	85	0.00107375		CTSSARLGGPSAETLYF	51	0.000649357
CASSLGGVANSDYTF	1713	0.0232185		CASSLALIGGGNTLYF	873	0.0114151		CASGERQGYEQYF	76	0.00108533		CASPLGTTNSDYTF	63	0.00101611		CSAEQEAPLF	93	0.00114843		CASGDCTQYF	70	0.0010805		CASSQDRGSSYERYF	90	0.00115823		CVSSEGQANTGQLYF	91	0.00127371		CASSPAGVETLYF	85	0.00107375		CASSDALSSDYTF	51	0.000649357
CASSDDRGHSDYTF	1713	0.0232185		CASRPGGADTQYF	864	0.0112974		CASGRGRDTEVF	76	0.00108533		CASGEGAGGYEQYF	63	0.00101611		CSLEIQSSEAGDSALYLRASSRDYAEQF	93	0.00114843		CRRDVNSDYTF	70	0.0010805		CSALRDRNIEVF	90	0.00115823		CNADASSYEQYF	91	0.00127371		CASSQESRVQGTQYF	85	0.00107375		CASGDETGGVFFGWSHISQILYNCESGSF	50	0.000636624
CASSDGTANSDYTF	1712	0.0232049		CASSPPGHYNSPLYF	862	0.0112713		CARSLVGGQNTLYF	76	0.00108533		CSAGGWGGYEQYF	63	0.00101611		CASSIDRGDTEVF	93	0.00114843		CTRSAGTNTEVF	70	0.0010805		CAGSQDPGGSTQYF	89	0.00114536		CASSQDRPGGSQNTLYF	91	0.00127371		CASSQDTISTGQLYF	85	0.00107375		CASSQEGEGGRRSAETLYF	50	0.000636624
CASSEEGDYEQYF	1709	0.0231643		CASSVRGANTEVF	861	0.0112582		CAWWTGGAEQF	76	0.00108533		CSADRGGTEVF	63	0.00101611		CGADHWNSGNTLYF	93	0.00114843		CGADRDWGAWLAEQF	70	0.0010805		CSGIANTEVF	89	0.00114536		CASNGINQDTQYF	91	0.00127371		CASSPGRVEQYF	85	0.00107375		CASSQDWTANSDYTF	50	0.000636624
CASGDAVTLNNQAPLF	1698	0.0230152		CASTGRLSNERLF	859	0.0112321		CASGDAFGGISNEGLF	76	0.00108533		CSADANYERLF	63	0.00101611		CSAAQEAPLF	93	0.00114843		CSADRANAEVF	70	0.0010805		CASSPGAGYYEQYF	89	0.00114536		CSTEGAPLF	91	0.00127371		CASSDGFALYF	85	0.00107375		CASSQDGTANSDNTF	50	0.000636624
CASGDVLASQNTLYF	1693	0.0229474		CASSDGQGARAEQF	851	0.0111274		CSAEGEKSQSTLYF	76	0.00108533		CASRSIGGYNYAEQF	63	0.00101611		CSVGQNTGRLYF	93	0.00114843		CSEPGLGGGYAEQF	70	0.0010805		CASSQDRGSSYGQYF	89	0.00114536		CNADFGRNTGQLYF	90	0.00125971		CASSLGDREVLF	85	0.00107375		CSGQNQDSQYF	50	0.000636624
CASSLSSGNTLCF	1688	0.0228796		CASSLAPDYEQYF	849	0.0111013		CASSQDGTANPDYTF	76	0.00108533		CSGVAERF	62	0.000999984		CASGDGRVGAETLYF	93	0.00114843		CSAERGQGTTGVF	70	0.0010805		CAGRGQNYAEQF	89	0.00114536		CSADQYNVETLYF	90	0.00125971		CSADSPGNTLYF	85	0.00107375		CSLTGVNHAPLF	50	0.000636624
CASSSGGEQYF	1687	0.0228661		CASSDASQGYEQHF	841	0.0109967		CASGDGTRGAEQF	75	0.00107105		CASGASGTKGTQYF	62	0.000999984		CASSDDRTGPSEQF	93	0.00114843		CVSSDRPNSDYTF	70	0.0010805		CVSSQDPAGGHAEQF	89	0.00114536		CASSQSRDHYAEQCF	90	0.00125971		CTSSLDRGANTGQLYF	85	0.00107375		CVSGDRGTENTEVF	50	0.000636624
CASGDWGDWSQNTLYF	1680	0.0227712		CASSGRGPNQDTQYF	833	0.0108921		CSVGRGNTEVF	75	0.00107105		CASSGPYNSPLYF	62	0.000999984		CTYSADRFSYEQYF	93	0.00114843		CSGGRNTEAF	70	0.0010805		CASSQDRGDQGTQYF	89	0.00114536		CSAERYNSPLCF	90	0.00125971		CAWSRGARDTQHF	85	0.00107375		CAGRDREVF	50	0.000636624
CASSQDEGRDTQYF	1679	0.0227576		CASSQPGNQDTQYF	827	0.0108136		CAGGPGQGATEVF	75	0.00107105		CSADRAGGTETLYF	62	0.000999984		CSTEGATEVF	93	0.00114843		CRRNINSDYTF	70	0.0010805		CASNPGLGGPAEQF	89	0.00114536		CASSHSRDHYAEQF	90	0.00125971		CASSPSNAEVF	85	0.00107375		CASSPSGTTSTEVF	50	0.000636624
CASSFRGRAEQF	1679	0.0227576		CASSFDSANSDYTF	826	0.0108006		CSAGGERLF	75	0.00107105		CASSQDLQGGTEVF	62	0.000999984		CSAGQPSNERLF	93	0.00114843		CASSSRGLEDTQYF	70	0.0010805		CASRGSSYEQCF	89	0.00114536		CSVDQGAETLYF	90	0.00125971		CASSRDTINTGQLYF	85	0.00107375		CGSGDETGGVF	50	0.000636624
CASSDRGF	1673	0.0226763		CSAPGQNSDYTF	824	0.0107744		CASSGRNSDYTF	75	0.00107105		CASSLSHFSNERF	62	0.000999984		CSLEIQSSEAGDSTLYLRASSLNRDTQYF	93	0.00114843		CSADAQPSSDYTF	70	0.0010805		CAGSPRDWGYEQYF	89	0.00114536		CSAEWEQAPLF	90	0.00125971		CASGDGWGANTGRLYF	85	0.00107375		CASSGLGGTEQIF	50	0.000636624
CAWRSGLGGGAEQF	1672	0.0226628		CASGDAQGMDPNERLF	822	0.0107483		CASGESLGREQYF	75	0.00107105		CSADYTEVLF	61	0.000983855		CSARDSNYAERF	92	0.00113608		CSGDSYEQYF	70	0.0010805		CASNLRGDTEVF	88	0.00113249		CSPRQFSNGRLF	90	0.00125971		CASSQDAGRSDYTF	85	0.00107375		CASRGISYEQHF	49	0.000623892
CASRGQSNTEVF	1671	0.0226492		CASSLRGGANSDYTF	806	0.010539		CAGSQGDSDYTF	75	0.00107105		CASGGAGGVQYF	61	0.000983855		CASSLRGRQNTLYF	92	0.00113608		CASRTANSDHTF	70	0.0010805		CASRPLGSYAEQF	88	0.00113249		CSANSYDSPLYF	90	0.00125971		CSAER_GTGQLYF	85	0.00107375		CASSQDGGKVF	49	0.000623892
CASGGPGQGPDYTF	1663	0.0225408		CASSLDWGLYAEQF	804	0.0105129		CASSQVSQNNQAQHF	75	0.00107105		CASSRDKAYEQYF	61	0.000983855		CSVDQEAPLF	92	0.00113608		CASGDRARQNALYF	70	0.0010805		CSSTRTGGGQNTLYF	88	0.00113249		CSGPGGGDTQYF	89	0.00124572		CSADIWGGGDTRYF	84	0.00106112		CASGHRASVETLYF	49	0.000623892
CAIRDWGNEQYF	1662	0.0225272		CASSLLGAYAEQF	803	0.0104998		CSAAGGNTEVF	75	0.00107105		CASSLDWAGPYEQYF	61	0.000983855		CANMSQGRTLYCTCSAGQYNSPLYF	92	0.00113608		CSSRKGTQYF	69	0.00106506		CLVGGYAEQF	88	0.00113249		CSAVVGGHERLF	89	0.00124572		CASGDAKNTGQLYF	84	0.00106112		CASSWDSYAEQFFGQEGTEVF	49	0.000623892
CASSGQEDTQYF	1655	0.0224323		CASSLARTGGGAEQF	795	0.0103952		CSADWGIQGTQYF	75	0.00107105		CTRAGHQNTLYF	61	0.000983855		CASSGGGNYAGQF	92	0.00113608		CASSPGLGGPDIQYF	69	0.00106506		CSETGGNTEVF	88	0.00113249		CASSLRDWGTNAETLYF	89	0.00124572		CAGSPGGTQYF	84	0.00106112		CASSPGTGDYNN_APPF	49	0.000623892
CASSSFRDTEVF	1653	0.0224052		CASSLERDTSYEQYF	786	0.0102775		CGAQGSTGQLYF	75	0.00107105		CASSQDSSYNNQAPLF	61	0.000983855		CSVGQNTRQLYF	91	0.00112373		CSVTNTEVF	69	0.00106506		CASSQDLSQNTLHF	88	0.00113249		CASGTWTGQNTLYF	89	0.00124572		CASSQGPAANTEVF	84	0.00106112		CASSPGTGDYNNQTPLF	49	0.000623892
CASGDGGKEQYF	1648	0.0223375		CASSLPGLGSAETLYF	784	0.0102514		CSTAQGNTEVF	74	0.00105677		CASSAGTTNSDYTF	61	0.000983855		CSADTGAEQLF	91	0.00112373		CSDRGSNTEVF	69	0.00106506		CASSRLAGEGTQYF	88	0.00113249		CASSQRQGVEQF	89	0.00124572		CASSDDWGYEQYF	84	0.00106112		CGSRGISYEQYF	49	0.000623892
CASSLREGEQYF	1645	0.0222968		CASSLAGLGGPYEQYF	784	0.0102514		CASSQGRGANTEVF	74	0.00105677		CSADSNNERLF	61	0.000983855		CASSRDYAEQSF	91	0.00112373		CASSSRDRVDEQYF	69	0.00106506		CASSGDTQTQHF	88	0.00113249		CASSLRDWGTSAEMLYF	89	0.00124572		CAWSHISQILQDRQLGSMTEK_SF	84	0.00106112		CASSPGTANSDYTF	49	0.000623892
CASSEQASYEQYF	1641	0.0222426		CASSQGASNERLF	779	0.010186		CASSEGQRNTEVLF	74	0.00105677		CSAVGGKYEPYF	61	0.000983855		CTRRVSGGVTEVF	91	0.00112373		CSAGRANTEVF	69	0.00106506		CASSRLAGEDTRYF	88	0.00113249		CASGALGGHGEQYF	89	0.00124572		CASSQEAINQDTQYF	84	0.00106112		CASGDTTSDYTF	49	0.000623892
CASGDPLWVSYEQYF	1622	0.021985		CASSWDWGGGEQYF	774	0.0101206		CASSQAVNQGTQYF	74	0.00105677		CAWSPSNRAPLF	61	0.000983855		CASGGPGQGPNTEVF	91	0.00112373		CSAERVEDF	69	0.00106506		CASSQRQDTGQLYF	88	0.00113249		CSAGTVYAERF	89	0.00124572		CASSDGSTLYF	84	0.00106112		CSGRGRTSAETLYF	49	0.000623892
CASSLPGTGDQAPLF	1616	0.0219037		CASSLRLGGLYNYAEQF	757	0.00989833		CSARDWGDE_YF	74	0.00105677		CSAGRTGGAYEQYF	61	0.000983855		CASSLLGQGGEQCF	91	0.00112373		CTRSAGGTNTGQLYF	69	0.00106506		CNADARDTLYF	87	0.00111962		CSAEGVPLF	89	0.00124572		CASSQERVDYAEQLF	84	0.00106112		CSAGQGANAGQLHF	49	0.000623892
CASGDTEQYF	1607	0.0217817		CSADRLGAGYF	754	0.0098591		CAWSHISQILENSQSGS_AKIQRF	74	0.00105677		CSGDKDTEVF	61	0.000983855		CSADYWNSGNTLYF	91	0.00112373		CSADRDDYAEQF	69	0.00106506		CSARCNSPLYF	87	0.00111962		CAGSWDRVYEQYF	88	0.00123172		CRGTGESTLYF	84	0.00106112		CTCSARLGGPSAETLYF	48	0.000611159
CASRPDRVAEQYF	1592	0.0215784		CASSRLGKDTQYF	749	0.00979372		CGAGDRFYGNTLYF	74	0.00105677		CTRSAEGWGGYEQYF	61	0.000983855		CSADTGAGQF	91	0.00112373		CASGTGGYSNQAPLF	69	0.00106506		CASSQDWGAPNTGQPYF	87	0.00111962		CASSQRRGAEQF	88	0.00123172		CASRRTGPNSEYTF	83	0.00104848		CSGGVNTLYF	48	0.000611159
CASTWDRTNTEVF	1591	0.0215649		CASGEGQNTLYF	735	0.00961066		CASSQGQGANTEAF	74	0.00105677		CASSGTGYTEVSF	61	0.000983855		CASSQGATNTEVF	91	0.00112373		CTRSAGGENEQYF	69	0.00106506		CTSRPLGGYAEQF	87	0.00111962		CSGNTEVF	88	0.00123172		CSADWGYEQYF	83	0.00104848		CASSLWYYEQYFGPGTEVF	48	0.000611159
CASGDSLGGNNQDTQYF	1580	0.0214158		CASSDASQGYEQCF	732	0.00957144		CSARDWGDEQHF	74	0.00105677		CASSLGTANSDYTF	61	0.000983855		CASSLLGQGGEQHF	91	0.00112373		CRRDINSDHTF	69	0.00106506		CSADYNSCNSPLYF	87	0.00111962		CAWSLGTGSDEQYF	88	0.00123172		CASSLRSRGTEVF	83	0.00104848		CASSDALNSDYPF	48	0.000611159
CASSFRDWDYAEQF	1570	0.0212802		CASSLVADSNERLF	732	0.00957144		CSADRDSYNSLLYF	74	0.00105677		CASSCGRESNYAEQLF	61	0.000983855		CTSSDWDNSYEQYF	91	0.00112373		CAGSLLGNQDTQYF	69	0.00106506		CASSQDLSRNTLYF	87	0.00111962		CASSPGTGNTGVF	88	0.00123172		CASSLDGQQDTQYF	83	0.00104848		CISSQGGGRSYEQYF	48	0.000611159
CASSLRTNTEVF	1565	0.0212125		CSTGLGEQNTLYF	720	0.00941453		CTRSAGGWQYF	74	0.00105677		CTRSAQGGYNSPLYF	61	0.000983855		CASSPRQGISNEGLF	91	0.00112373		CSAGGTSTGQLYF	69	0.00106506		CAGSQARGRSPLYF	87	0.00111962		CASSQARGAYTEVF	88	0.00123172		CASSLLGQGHAEQF	83	0.00104848		CTSSGTGVNSDYTF	48	0.000611159
CASGEDTHYAEQF	1556	0.0210905		CASSLQGGGNTLYF	720	0.00941453		CASSQGGSDYTF	74	0.00105677		CASSLDWAGSYERYF	60	0.000967726		CSADHWNPGNTLYF	91	0.00112373		CGAGPDTEVF	69	0.00106506		CSVRYNSPLYF	87	0.00111962		CSPGQNYAEQF	88	0.00123172		CSAPHWGQNTLYF	83	0.00104848		CASDGRQSQNTLYF	48	0.000611159
CASSFPGKTEQF	1549	0.0209956		CASSPTGDTGQLYF	719	0.00940145		CSAGGSTEVF	74	0.00105677		CASSRAGVQDTQYF	60	0.000967726		CASGVPGQGPNTEAF	91	0.00112373		CSGTGGGYAEQLF	69	0.00106506		CAGSRLAGEDTQYF	87	0.00111962		CSADQGTETLYF	88	0.00123172		CAWGRGARDTQYF	83	0.00104848		CASSGALNSDYTF	48	0.000611159
CASSLGPNYAEQF	1547	0.0209685		CASSLGGNNQAPLF	709	0.00927069		CASGANTGQPYF	74	0.00105677		CASSENSYNSPLHF	60	0.000967726		CTWSLTGGVYAEQF	91	0.00112373		CRARTGNERLF	69	0.00106506		CASS_GQDTGQLYF	87	0.00111962		CASSQSRHHYAEQF	88	0.00123172		CSETVSNEK_SF	83	0.00104848		CTSSQGEGRSYEQYF	48	0.000611159
CAGSQEGEDTQYF	1545	0.0209414		CSPGQVIYEQYF	703	0.00919224		CASSQAANQDTQYF	73	0.00104249		CSADERNTEVF	60	0.000967726		CAGSLGTANSDYTF	91	0.00112373		CASSGLRGLNTLYF	69	0.00106506		CSKWDWGGETLYF	87	0.00111962		CSVDFGRNTGQLYF	88	0.00123172		CASSLDRGDSGNTLHF	83	0.00104848		CSAGVNTF	48	0.000611159
CASSPGDTQYF	1543	0.0209143		CSAGLREQNTLYF	693	0.00906148		CSAGGDTEVF	73	0.00104249		CSAEPISNERLLF	60	0.000967726		CASSDADRNSGYTF	91	0.00112373		CTRRRDINSDYTF	68	0.00104963		CVSSLPGRDNQAQHF	86	0.00110675		CSANSYTSPLYF	88	0.00123172		CASSLDRVEQYF	83	0.00104848		CASGDRGTENTEVSF	48	0.000611159
CASGAGTDNSPLYF	1535	0.0208058		CASSSWGERGDTQYF	692	0.00904841		CSADRGSYEQYF	73	0.00104249		CTRSASGNEQYF	60	0.000967726		CSLRG_DTQYF	90	0.00111138		CSADWGEAAETLYF	68	0.00104963		CSSTGTGGDQNTLYF	86	0.00110675		CSTVGDEQYF	88	0.00123172		CASSPGGTQCF	83	0.00104848		CTWSADEGSYNSPLYF	48	0.000611159
CASSEPGTGYEQYF	1520	0.0206025		CASSDVSGGGGQNTLYF	692	0.00904841		CASGGTGEKDTQYF	73	0.00104249		CSAEPISSERLF	60	0.000967726		CSADRGQDTLYF	90	0.00111138		CASRTANSDYAF	68	0.00104963		CSASGDEQYF	86	0.00110675		CSTDQGHTGQLYF	87	0.00121772		CASSQGPVANTEAF	82	0.00103585		CASNWDSYAEQF	48	0.000611159
CASSLQGYEQYF	1518	0.0205754		CSVGTGSSTETLYF	688	0.0089961		CAWSLPRGPNTGQLYF	73	0.00104249		CPSSDAGDSPLYF	60	0.000967726		CASSQKQGRSDYTF	90	0.00111138		CASRIRGLSNERLSF	68	0.00104963		CASSRGHANTGQLYF	86	0.00110675		CASSALGGRGEQYF	87	0.00121772		CAGSDSLGGDTQYF	82	0.00103585		CASGGP_GSNTEVF	48	0.000611159
CASSPQHSGNTLYF	1503	0.0203721		CASGETGTGEGDGRLF	674	0.00881304		CASSGTNSGNTLYF	73	0.00104249		CASSPDKTYEQ_F	60	0.000967726		CASGPRGRQNTLYF	90	0.00111138		CASGGTDSQDTLYF	68	0.00104963		CNADPVNTLYF	86	0.00110675		CASSHLRGAHTEVF	87	0.00121772		CSADTRGNSPLYF	82	0.00103585		CASSQGGGCSYEQYF	48	0.000611159
CASSFRDSNERLF	1503	0.0203721		CASSLSRQGGYAEQF	672	0.00878689		CSADLSQNTSYF	73	0.00104249		CASSLYKSYEQYF	60	0.000967726		CASSLDGIYAEQF	90	0.00111138		CAWSRGGSAETLYF	68	0.00104963		CSSTGTGGGQDTLYF	86	0.00110675		CANSQSGDNNQDTQYF	87	0.00121772		CASSDGFTLCF	82	0.00103585		CASSHPGTGVF	47	0.000598427
CASSLRNNNQAPLF	1490	0.0201959		CASSDASQGCEQYF	671	0.00877382		CTRSAAGNSPLYF	73	0.00104249		CASSIAGGNQAPLF	60	0.000967726		CGAGDSQNTLYF	90	0.00111138		CSAVRGSQNTLYF	68	0.00104963		CSAAGGAGNSPLCF	86	0.00110675		CSAAGTGVAKQF	87	0.00121772		CSAVRADTEVF	82	0.00103585		CTSGDATGGYAEQF	47	0.000598427
CASSLDINYAEQF	1465	0.019857		CASSLSAYEQYF	671	0.00877382		CSADPTKTSQSTLYF	73	0.00104249		CSAVGQGAGNTPYF	60	0.000967726		CASSLLGQGGERYF	90	0.00111138		CSAKPVYEQYF	68	0.00104963		CSADPEGKTEVF	86	0.00110675		CASTQSRDHYAEQF	87	0.00121772		CASGDARVNYAEQF	82	0.00103585		CASS_DTGGYAEQF	47	0.000598427
CASSLRGNQAPLF	1458	0.0197621		CATGTGGNQAPLF	669	0.00874767		CSAVRDSNTRQLYF	73	0.00104249		CASSLDKSYVQYF	60	0.000967726		CSLEIQSSEAGDSALYLRASSPRGRQNTLYF	90	0.00111138		CSADWGEVAEALYF	68	0.00104963		CTYSDRQGNTEVF	85	0.00109388		CSPRQFSNERSF	87	0.00121772		CSPPHWGQDTQYF	82	0.00103585		CASSPGTGDYDNQAPPF	47	0.000598427
CASSLQSSYEQYF	1457	0.0197486		CASSTGFNYAEQF	653	0.00853845		CSADGDWGSQNTSYF	73	0.00104249		CASSGTTGDTLYF	60	0.000967726		CSADSRGQNTLYF	90	0.00111138		CSADAESTLYF	68	0.00104963		CVSSQDWGAPNTGQLYF	85	0.00109388		CASSQRQGAGQF	87	0.00121772		CASGADRVNYVEQF	82	0.00103585		CASSQEGVGGRKSAETLYF	47	0.000598427
CASGDRGNQAPLF	1453	0.0196944		CASSLVGGINYAEQF	640	0.00836847		CSVDPTDNSPLYF	73	0.00104249		CASSIAQGIYAEQF	60	0.000967726		CASSPGQGAGGQNTLYF	90	0.00111138		CSDKGPNTEVF	68	0.00104963		CASSFDWGVSYEQYF	85	0.00109388		CSAEGTPLF	87	0.00121772		CSARRGDTQYF	82	0.00103585		CASRQEGVGGRRSAETLYF	47	0.000598427
CASGDAGANSDYTF	1452	0.0196808		CASSRDGSYEQYF	639	0.00835539		CSAEGRDTEVF	73	0.00104249		CASSDPGDSPLYF	60	0.000967726		CASSVGQGNSAETLYF	90	0.00111138		CSANGNPF	68	0.00104963		CASGQEQGNSYEQYF	85	0.00109388		CSADVSSYEQYF	87	0.00121772		CASSQGELQDTQYF	82	0.00103585		CSACRGQNTLYF	47	0.000598427
CASSLDDTQYF	1449	0.0196402		CGARGQGASDYTF	633	0.00827694		CAWSPGGMNQARHF	73	0.00104249		CASSLGQYNYAEQLF	60	0.000967726		CSSTAAFPNERLF	90	0.00111138		CSAGGRKNERLF	68	0.00104963		CSGGTGGPGRLYF	85	0.00109388		CTYSAERYNSPLYF	87	0.00121772		CSADAGGNSPLYF	82	0.00103585		CSQQDTQYF	47	0.000598427
CASSKTGTGDGTEVF	1439	0.0195046		CASSLEQGLADYTF	631	0.00825079		CSAGGQADTEVF	73	0.00104249		CSEQERDTEVF	59	0.000951597		CSAAGGGYF	90	0.00111138		CSAERVEEAF	68	0.00104963		CTYSPYREGEVF	85	0.00109388		CASSHPGQGSSERLF	87	0.00121772		CASSPDRVERYF	82	0.00103585		CAGSFYTGNTLYF	47	0.000598427
CASRPQEGQNTLYF	1436	0.0194639		CASSFWQGGQNTLYF	630	0.00823771		CASSPGTGANTGVF	72	0.00102821		CAGSLGTTNSDYTF	59	0.000951597		CGPGLGGQDTQYF	90	0.00111138		CSVGGTNTGQLYF	68	0.00104963		CASRGQNYAEQSF	85	0.00109388		CASSLQGRAETLYF	87	0.00121772		CASSQDTWGSAETPYF	82	0.00103585		CGGTGRSSAETLYF	47	0.000598427
CASSFAGSGERLF	1418	0.01922		CASGQALNQDTQYF	630	0.00823771		CSTERGGNTLYF	72	0.00102821		CSADKAGGAETLYF	59	0.000951597		CSATGGAHEQYF	90	0.00111138		CTRSAGGLYEQYF	68	0.00104963		CASSQGWEEDTQYF	85	0.00109388		CRPDQNYAEQF	86	0.00120373		CASRTLSQDTQYF	82	0.00103585		CRAGQGANTGQLYF	47	0.000598427
CASSAGTGGRDTQYF	1409	0.019098		CASSLGLEAYEQYF	619	0.00809388		CGAGNQDTQYF	72	0.00102821		CASSDEGGEQYF	59	0.000951597		CASSGRSSYEQYF	90	0.00111138		CTRSAEAYEQYF	67	0.00103419		CASGAAGGNQDTLYF	85	0.00109388		CSARGGLAEQF	86	0.00120373		CASSGIGGALEQYF	81	0.00102322		CASSFPSGGSYEQYF	47	0.000598427
CASRTGGGDTQYF	1404	0.0190302		CASSLGTNSDYTF	616	0.00805465		CASSQGQGANTEVLF	72	0.00102821		CASSPWDWGYAEHF	59	0.000951597		CASERWGPGNTLYF	90	0.00111138		CSAGRENEQYF	67	0.00103419		CTYSAGRDISYNSPLYF	85	0.00109388		CASGDATFSNEGLF	86	0.00120373		CAWSRGARDTRYF	81	0.00102322		CASSQEGVGGRRRAETLYF	47	0.000598427
CASSFGVGTEVF	1395	0.0189082		CASSNPGHPNSDYAF	616	0.00805465		CTRSAASLGGRDTQYF	72	0.00102821		CASSDSGDSPLYF	59	0.000951597		CSAGTGVNQTPLF	89	0.00109903		CASSLDKTEVLF	67	0.00103419		CSADVRGLYAEQF	85	0.00109388		CSAAGTGVAVQF	86	0.00120373		CTSSQGGTGVDTQYF	81	0.00102322		CASGGPQGSNTKVF	47	0.000598427
CGARVQGIGNTLYF	1391	0.018854		CSADRGNTEVF	615	0.00804158		CSAGQYTGRLYF	72	0.00102821		CSEQGRDTEVLF	59	0.000951597		CSSTAAFSNERLLF	89	0.00109903		CAWSLEGSAETLYF	67	0.00103419		CSVDWGSYEQYF	85	0.00109388		CSEGQTNTEVF	86	0.00120373		CAGSLEDANTEVF	81	0.00102322		CSASLGGPSAETLYF	46	0.000585694
CASGDASGTTNSDYTF	1390	0.0188405		CASSDGSQGYEQYF	611	0.00798927		CSAEQGRQNTLYF	72	0.00102821		CSADRPSAETPYF	59	0.000951597		CASRQISTEVF	89	0.00109903		CSADPFNSENTLYF	67	0.00103419		CANSQGHANTGQLYF	85	0.00109388		CSPSPGGSAETLYF	86	0.00120373		CAWSLGASSNERLF	81	0.00102322		CSLTGVNQAPHF	46	0.000585694
CASGPTGGNTEVF	1389	0.0188269		CASSIDWTGQLYF	592	0.00774083		CASSPTENTSYF	72	0.00102821		CSADRARGAETLYF	59	0.000951597		CTRSVGSSAETLYF	89	0.00109903		CSVGQNNSPLYF	67	0.00103419		CSAEALN_DTQYF	84	0.00108101		CRLGAETLYF	86	0.00120373		CASSLRGVQNTLYF	81	0.00102322		CASSQDGTGDYNNQAPLF	46	0.000585694
CASRWGGAVEQYF	1378	0.0186778		CASSFPGGAETLYF	589	0.00770161		CASSPDRGNAEQF	72	0.00102821		CSGDRSYGQYF	59	0.000951597		CTRKSQNTLYF	89	0.00109903		CSAAGTKFSSERLF	67	0.00103419		CASSPDSSCEQYF	84	0.00108101		CVSSQSGDNNQDTQYF	86	0.00120373		CASSPAGAEMLYF	81	0.00102322		CASGGRQSQTTLYF	46	0.000585694
CASSQKQGANSDYTF	1370	0.0185694		CASSLEDRDSGNTLYF	568	0.00742702		CSATGSGYNSPLYF	72	0.00102821		CSASGTEVLF	59	0.000951597		CASSQDGVTGQLYF	89	0.00109903		CSVGQGGPNERLF	67	0.00103419		CANMSQGRTLYCTCSADSGGNYAEQF	84	0.00108101		CSETGP_DTQYF	86	0.00120373		CASSDD_GGEEQYF	81	0.00102322		CTSSPGTGDYNNQAPLF	46	0.000585694
CASGETGSYEQYF	1370	0.0185694		CASSLEGWNSAETLYF	563	0.00736164		CASGEPGGSTEVF	72	0.00102821		CSADGPSAETLYF	59	0.000951597		CGAARGGYF	89	0.00109903		CSADRDWGAWPAEQF	67	0.00103419		CASSRSAGEDTQYF	84	0.00108101		CASSRDRLGGSQNTLYF	86	0.00120373		CASGDDWGGEEQYF	81	0.00102322		CASSHSGTEVF	46	0.000585694
CAWSLQGDNERLF	1368	0.0185423		CVSSDASQGYEQYF	560	0.00732241		CSPQGISNEKLF	72	0.00102821		CSVDIANTEVLF	59	0.000951597		CSAAQNAEVF	89	0.00109903		CAGGPGGAEVF	67	0.00103419		CASGGLGGDEQYF	84	0.00108101		CSGLGGRDTQYF	86	0.00120373		CSADKNALYF	81	0.00102322		CANSQDTGGYAEQF	46	0.000585694
CASSFSGGASGNTLYF	1361	0.0184474		CASSAGTGSSQNTLYF	552	0.0072178		CSAVQNSNTGQLYF	72	0.00102821		CAWRRTGPERYF	59	0.000951597		CSASRDPGGDTQCF	89	0.00109903		CSADRADTEVF	67	0.00103419		CSAAGGAGDSPLYF	84	0.00108101		CASSQDTELRLQVANMSQGRTLYCTCSASRGQDTQYF	86	0.00120373		CTRRGTGENTLYF	81	0.00102322		CASSQEGAYNSPLYF	46	0.000585694
CASGDTNNNQAPLF	1355	0.0183661		CSSSQRTGGLEQYF	544	0.0071132		CASGVEGGREQYF	72	0.00102821		CNADGRNTEVF	59	0.000951597		CASSLVGTDTEVSF	89	0.00109903		CSAGAENTLYF	67	0.00103419		CASSLPGRDNQAQRF	84	0.00108101		CAGSGGQGANSPLYF	85	0.00118973		CASSPRTGGSF	81	0.00102322		CASSPGAGDYNNQAPPF	46	0.000585694
CASGPPGLGGVNQDTQYF	1348	0.0182712		CASGETGDQDTQYF	540	0.0070609		CASSPDWGNAEQLF	72	0.00102821		CASSAGTKDTLYF	59	0.000951597		CGATGVGGNTLYF	89	0.00109903		CAWRLGGSAETLYF	67	0.00103419		CSAGRAGNTLYF	84	0.00108101		CVSGALGGRGEQYF	85	0.00118973		CASSDAGTGDAE_F	81	0.00102322		CSAVVNTLYF	46	0.000585694
CASTQGNQDTQYF	1341	0.0181763		CASSLTGTNSGYTF	539	0.00704782		CSADRGTNSDHTF	72	0.00102821		CSADANNEVF	59	0.000951597		CASSPTGGPYEQYF	89	0.00109903		CASRIGGLSNERLF	67	0.00103419		CSASGTDAEQF	84	0.00108101		CASSLRDWGTSAETLSF	85	0.00118973		CASSLLGQDYAEQF	81	0.00102322		CTSSLVGGALEQYF	46	0.000585694
CASGDWGGYAEQF	1329	0.0180136		CASSLGEQYF	535	0.00699552		CASSQGLGASYEQYF	71	0.00101392		CSAEGGGVF	59	0.000951597		CASSSGTNYAEQF	89	0.00109903		CARSGTANTEVF	67	0.00103419		CASSQGGQGEQYF	84	0.00108101		CSAD_YNAETLYF	85	0.00118973		CSAVGTSSDYTF	80	0.00101059		CTSSQGGGHSYEQYF	46	0.000585694
CASGVRDRGNERLF	1329	0.0180136		CASSLDWENYAEQF	530	0.00693014		CASSDVGYEQHF	71	0.00101392		CSAEPISNGRLF	58	0.000935469		CASSNAGGGSDYTF	89	0.00109903		CASADKNPNERLF	67	0.00103419		CSAGVPEVSF	83	0.00106815		CSAAGTGVVEQF	85	0.00118973		CASSEPGQSSERLF	80	0.00101059		CASSHIWGDEQYF	46	0.000585694
CASGDMGRQNTLYF	1321	0.0179052		CSAGLGKQNTLYF	522	0.00682553		CSAGRGVF	71	0.00101392		CASSATSAETL_F	58	0.000935469		CAGSGLGEGEQYF	89	0.00109903		CASSLDPPGLGGYEQYF	66	0.00101875		CSPHREGEVF	83	0.00106815		CTSRPGQNYAEQF	85	0.00118973		CASGPATNTGQLYF	80	0.00101059		CASSPGTGD_NNQAPLF	46	0.000585694
CASSLTNWRSAETLYF	1318	0.0178645		CASSTGTGGGYEQYF	510	0.00666862		CASSDQSYAVQF	71	0.00101392		CSAEPIPNERLF	58	0.000935469		CASSQGGGAVAETLYF	89	0.00109903		CSAGQGQDTRYF	66	0.00101875		CAWRRTFDNQAQHF	83	0.00106815		CSEDREVF	85	0.00118973		CRGTGENTSYF	80	0.00101059		CASRDREVSF	45	0.000572962
CASSTGFTEVF	1314	0.0178103		CASGDD_GGQNTLYF	498	0.00651171		CSAPGQPPSNERLF	71	0.00101392		CAGSFRDWGYAEQF	58	0.000935469		CSADLGAAPLF	89	0.00109903		CARSGTTSTEVF	66	0.00101875		CSATVTTEVF	83	0.00106815		CSATGTGVAEQF	85	0.00118973		CASSQDPGLGTGQLYF	80	0.00101059		CASSHIWGYEQYFGPGTEVF	45	0.000572962
CASGDEGGGACEQYF	1313	0.0177968		CSSSPWGYYAEQF	498	0.00651171		CASSDQSYAGQF	71	0.00101392		CTCSADRAGGAETLYF	58	0.000935469		CASSQAWGVNQDTQYF	89	0.00109903		CAWSLGGNAETLYF	66	0.00101875		CSAEGTNQDTQYF	83	0.00106815		CVWSHWGNYAEQF	85	0.00118973		CASSPSDTEVF	80	0.00101059		CASSPGTGDHNNQAPLF	45	0.000572962
CASSLGTAYEQYF	1312	0.0177832		CASSSGTGGEGNTLYF	495	0.00647249		CSADQGAGNERLF	71	0.00101392		CSAPGTDGTEAF	58	0.000935469		CASSPQTGGISYEQYF	89	0.00109903		CSADRDWRAWLAEQF	66	0.00101875		CSAIGDEQYF	83	0.00106815		CASSRDWTGIDTQYF	85	0.00118973		CASSPYWGNYAEQLF	80	0.00101059		CASSQGEGRSYEQYF	45	0.000572962
CASGANSDYTF	1308	0.017729		CASSSGTKNTLYF	494	0.00645941		CSDPGGADQGTQYF	71	0.00101392		CASSLSHFSNGRLF	58	0.000935469		CASSLQGSHPEVLF	89	0.00109903		CSALGDNYAEQSF	66	0.00101875		CSADAWDTLYF	83	0.00106815		CSADSAANTEVF	84	0.00117573		CASSLSWGVQNTLHF	79	0.000997955		CSGTGRTSAETLSF	45	0.000572962
CASGDDWGPTGQLYF	1302	0.0176477		CVSSDPNSPLYF	483	0.00631558		CAWSLAGGGYTLYF	71	0.00101392		CASNRGDTRYF	58	0.000935469		CSAGDSRNTLYF	89	0.00109903		CTRSAPGGASLYF	66	0.00101875		CASSQGTGAETPYF	83	0.00106815		CTCSADNYEQYF	84	0.00117573		CASSDMDGHEQYF	79	0.000997955		CSGTGGSSAETLYF	45	0.000572962
CASGDDTPNYAEQF	1295	0.0175528		CASSFNANTEVF	478	0.0062502		CSSRDRGSYEQYF	71	0.00101392		CSAVNRDTQYF	58	0.000935469		CSADHWNSGNTPYF	89	0.00109903		CASRDRPNSDYTF	66	0.00101875		CSVDRQGRNSPLYF	83	0.00106815		CSAAGIGVAEQF	84	0.00117573		CSLEIQSSEAGDSALYLRASSLLGQGYAEQF	79	0.000997955		CSAYEGSYNSPLYF	45	0.000572962
CASSEGLGGEQYF	1290	0.017485		CASSPGQGAGNTLYF	473	0.00618482		CASSDRSYAEQF	71	0.00101392		CASSPRGVSGNTLYF	58	0.000935469		CAGSQGQTNSDYTF	89	0.00109903		CSADSQSTLYF	66	0.00101875		CASSQGRAQYF	82	0.00105528		CAWSLGTGRNEQYF	84	0.00117573		CTYSADWGAYEQYF	79	0.000997955		CASGHRVSAETLYF	45	0.000572962
CASGPGLGGRAEQF	1288	0.0174579		CASSDTSQGYEQYF	470	0.00614559		CSGGLPYEQYF	71	0.00101392		CASSSSQSTLYF	58	0.000935469		CASSDARGSSAETLYF	89	0.00109903		CSAGRNNSPLYF	66	0.00101875		CASRGLGGDERYF	82	0.00105528		CASSQDADRAYAEQF	84	0.00117573		CASSPGRGAYEQYF	79	0.000997955		CSAGVKTLYF	45	0.000572962
CASSLTQGAREQYF	1286	0.0174308		CTSSDASQGYEQYF	469	0.00613252		CSADGLGGYAERF	71	0.00101392		CASSLGSGGQNTLYF	58	0.000935469		CASSWDNSYEQYF	89	0.00109903		CTRSETGGQDTQYF	66	0.00101875		CAWSLRDNTRQLYF	82	0.00105528		CAWSHWGNYTEQF	84	0.00117573		CASSLRGRGTEVVF	79	0.000997955		CASSHIWGYEPYF	45	0.000572962
CASSRTASAETLYF	1279	0.0173359		CSGDWGLYAEQF	465	0.00608022		CAGSQGLGVSYEQYF	71	0.00101392		CTRSAEQEQYF	58	0.000935469		CASSQGQTSSDYTF	88	0.00108668		CGAELSANTEVF	66	0.00101875		CSADRQGRNSPLHF	82	0.00105528		CASSQSPGTVYEQHF	84	0.00117573		CASSQGPVANAEVF	79	0.000997955		CTGSAGVNTLYF	44	0.000560229
CASGGPTGTEVF	1261	0.017092		CGAGQDNNQAPLF	453	0.00592331		CASGQGDSDYTF	71	0.00101392		CASGLSHFSNERLF	58	0.000935469		CASSDVRGPSAETLYF	88	0.00108668		CSRGTFNTEAF	66	0.00101875		CSADVGGLYTEQF	82	0.00105528		CASSRQGAEVF	84	0.00117573		CASSLGGRNYAEQF	79	0.000997955		CSARNQAPRF	44	0.000560229
CASSQGSQNTLYF	1260	0.0170784		CASSDVSQGYEQYF	450	0.00588408		CASGDQLGGGAETLYF	71	0.00101392		CTCRLRDRGDSDYTF	58	0.000935469		CQGTENTEVSF	88	0.00108668		CASSYGDSNERLF	66	0.00101875		CASSQDLTNTEVF	82	0.00105528		CASSEGQANTGQLCF	84	0.00117573		CSAVWGYEQYF	79	0.000997955		CASSDARDRDEQSF	44	0.000560229
CASGDPRNQDTQYF	1243	0.016848		CSAGLEEQNTLYF	450	0.00588408		CTRSAVSGGVYEQYF	71	0.00101392		CASGLGANYAEQF	57	0.00091934		CAWSLTGGMYAEQF	88	0.00108668		CSSRKDAQYF	66	0.00101875		CAGGPGQGNQDTQYF	82	0.00105528		CTCSADQGAETLYF	84	0.00117573		CASSEPGQSDERLF	79	0.000997955		CSGQNQDTQF	44	0.000560229
CASSSRGGAEQF	1233	0.0167124		CASSDASQGYE_YF	444	0.00580563		CASGRDRGDNQAPLF	71	0.00101392		CASSEAGDSPLYF	57	0.00091934		CSAVANTGRLYF	88	0.00108668		CAWRGQGLSQNTLYF	66	0.00101875		CASSQEQGNPYEQYF	82	0.00105528		CAWSHISQILQHCQL_AF	84	0.00117573		CSADTGGNSPLHF	79	0.000997955		CASSPPGTTNTEVF	44	0.000560229
CASSSNSDYTF	1214	0.0164549		CASSHAGRAEQF	443	0.00579255		CASSIGTNTEVF	71	0.00101392		CAGGEDNANSDYTF	57	0.00091934		CSSSRNSQDTQYF	88	0.00108668		CSGAGGGYAEQF	66	0.00101875		CASSQGLSQNTLYF	82	0.00105528		CASGDATSSNERLF	84	0.00117573		CASGHYEQHF	79	0.000997955		CASSPGTGVGGRRSAETLYF	44	0.000560229
CASGEQGTGGALEQYF	1204	0.0163194		CASGQGRAETLYF	417	0.00545258		CASSQGLGGSAETPYF	70	0.000999644		CASSPGTGYERLF	57	0.00091934		CSVSRDPGGDTQYF	88	0.00108668		CASRIRGLSDERLF	66	0.00101875		CSAAGGTGNSPLYF	82	0.00105528		CASSLWDREDEQYF	83	0.00116174		CASSLSQTEQSF	79	0.000997955		CASGGLQGSNTEVF	44	0.000560229
CASSFEGGPGQLYF	1199	0.0162516		CILEILSSEEDDSALYLCASSLYSDAEQF	416	0.0054395		CASSQDPGGARSSYEQYF	70	0.000999644		CTRSADQDWGGWQNTLYF	57	0.00091934		CAGSPTGSNTEVF	88	0.00108668		CSAWGRDTQYF	66	0.00101875		CSAGRDISYDSPLYF	82	0.00105528		CSTDFGRNTGQLYF	83	0.00116174		CAGRTLNQDTQYF	79	0.000997955		CASSQQGGEVF	44	0.000560229
CAWGQTDANSDYTF	1194	0.0161838		CASSPGTGGSSYEQYF	410	0.00536105		CTRSAVQDSNTGQLYF	70	0.000999644		CSADQDRGGWQNTLYF	57	0.00091934		CSAGQRDSPLYF	88	0.00108668		CTRSEPGLGGDYAEQF	66	0.00101875		CASGPGTGINEQYF	82	0.00105528		CASSAWTGQNTLYF	83	0.00116174		CSAVWGDE_YF	79	0.000997955		CASSPGTGDYDNQAPLF	44	0.000560229
CASSLHTSAETLYF	1188	0.0161025		CASSDASQDYEQYF	409	0.00534797		CSGDRISDERLF	70	0.000999644		CSADG_NTEVF	57	0.00091934		CSADTYEQCF	88	0.00108668		CSAAGTKFSNEK_SF	65	0.00100332		CSAEALNQATQYF	81	0.00104241		CASSQDQNTEVSF	83	0.00116174		CASSLGPDYTF	79	0.000997955		CSGTGRSSAETLHF	44	0.000560229
CASSINYEQYF	1188	0.0161025		CASSRAPGTSTEVF	409	0.00534797		CSDAQKDTEVF	70	0.000999644		CASGDSTGGHSYEQYF	57	0.00091934		CAGSQNRNYAEQF	88	0.00108668		CSARTNTGQLYF	65	0.00100332		CTYSADARDTLYF	81	0.00104241		CRRGGETLYF	83	0.00116174		CTSSLSWGVQNTLYF	79	0.000997955		CASSQDRGEVF	44	0.000560229
CASGRDINERLF	1178	0.0159669		CASGDADGGYSDYTF	408	0.0053349		CAGSQGQGANTEVF	70	0.000999644		CTSSQDLSYNNQAPLF	57	0.00091934		CASGDAAENSDYTF	87	0.00107434		CASSQDRGNSPLYF	65	0.00100332		CTGSAGGDSPLYF	81	0.00104241		CASSDWDKEAF	82	0.00114774		CAGSQAGGWEQYF	79	0.000997955		CASNQDGGEVF	44	0.000560229
CASGVENERLF	1178	0.0159669		CSASGTGGNTLYF	404	0.0052826		CASSDQSHAEQF	70	0.000999644		CSEQGGDTEVF	57	0.00091934		CASGEGYNSPLYF	87	0.00107434		CSALGVQDTQCF	65	0.00100332		CAGRGSSYEQYF	81	0.00104241		CASGALGGCGEQYF	82	0.00114774		CARGDARNTGQLYF	79	0.000997955		CASSQKGVGGRRSAETLYF	44	0.000560229
CASGDAGTGGSQSTLYF	1165	0.0157907		CASSDWDREVF	401	0.00524337		CSAGLGTSQNTLYF	70	0.000999644		CARTWGVNYAEQF	57	0.00091934		CASSRAVYEQYF	87	0.00107434		CSAANTEVF	65	0.00100332		CASSQGRGTSDYTF	81	0.00104241		CSPRQFSNERLSF	82	0.00114774		CASSQDTGGNQGTQYF	79	0.000997955		CSARLGGHSAETLYF	43	0.000547497
CASSFSDNQDTQYF	1163	0.0157636		CASSGSGVYAEQF	395	0.00516491		CASGDAFGGIPNERLF	70	0.000999644		CASSDGGDEQYF	57	0.00091934		CTSSDARGPSAETLYF	87	0.00107434		CSARDWGAETLYF	65	0.00100332		CASSSRGDTEVF	81	0.00104241		CASARDDYAEQF	82	0.00114774		CAWSLGAFSNEGLF	78	0.000985322		CVSRSGQEGTEVF	43	0.000547497
CASSFWGGKVF	1162	0.0157501		CANSDASQGYEQYF	394	0.00515184		CASSQGLNTGVF	70	0.000999644		CTRSGDKNTEVF	57	0.00091934		CVSSQGLGGRGAEQF	87	0.00107434		CSADPFNFGNTLYF	65	0.00100332		CASGQGQAQYF	81	0.00104241		CASSQDADWACAEQF	82	0.00114774		CTYSADRADTEVF	78	0.000985322		CANMSQGRTLYCTCSARLGGPSAETLYF	43	0.000547497
CASSLAGTQDTQYF	1156	0.0156688		CSAGGQGDTGQLYF	389	0.00508646		CSTGQTSAETLYF	70	0.000999644		CASGDAGLGVSQNTLYF	56	0.000903211		CASGLDRIYAEQF	87	0.00107434		CASSFWGSSQNTLYF	65	0.00100332		CASSPGTGINERYF	81	0.00104241		CASNHRDWATGQLYF	82	0.00114774		CSAVRGDEQYF	78	0.000985322		CASSWTINQDTQYF	43	0.000547497
CASSLF	1156	0.0156688		CASRPGQGYAEQF	388	0.00507338		CSAAGGDTEVSF	69	0.000985363		CASSLRGAGNTLYF	56	0.000903211		CSPRGWDTQYF	87	0.00107434		CASGGFRDTGVF	65	0.00100332		CGAGKAGNTLYF	81	0.00104241		CASSQDEGYGQYF	82	0.00114774		CASGDGANTEVSF	78	0.000985322		CASSDARDKDEQYF	43	0.000547497
CASSSGQGDTEVF	1155	0.0156552		CNAGLGEQNTLYF	387	0.00506031		CSAVSGGAYEQYF	69	0.000985363		CASRDSANTEVLF	56	0.000903211		CASSQDKTGVTEAF	86	0.00106199		CASRSRDRGNSPLYF	65	0.00100332		CSAPGQANTEVF	81	0.00104241		CSADASSYEPYF	82	0.00114774		CASSHQGPQGTQYF	78	0.000985322		CASGPSGTTNTEVF	43	0.000547497
CASSLVVTGSVDTQYF	1155	0.0156552		CASSRRGLGPYEQYF	387	0.00506031		CRAAQGNTEVF	69	0.000985363		CASSLGANYAEQSF	56	0.000903211		CSAAQDTEVF	86	0.00106199		CSAAGTKFSNEGLF	65	0.00100332		CASS_DPAGGHAEQF	81	0.00104241		CASSRLRGAYTEVF	82	0.00114774		CASSGLGGTEQLF	78	0.000985322		CTSQGSDTEVF	43	0.000547497
CASGGGQGYSPLYF	1154	0.0156416		CASGETGAANTLYF	385	0.00503416		CASSDVQKDTEVF	69	0.000985363		CGADRLGVSQNTLYF	56	0.000903211		CSVGDSQNTLYF	86	0.00106199		CSGRGRNSPLYF	65	0.00100332		CASSQDGSPCAEQF	81	0.00104241		CSAVGDEQF	82	0.00114774		CASSPSNTEVSF	78	0.000985322		CSASRGQTTLYF	43	0.000547497
CASGQQNSDYTF	1153	0.0156281		CGARADYEQYF	383	0.00500801		CSADRAGGDEGLF	69	0.000985363		CASPRDKTYEQYF	56	0.000903211		CSAEGGGEQHF	86	0.00106199		CSANDNPLF	65	0.00100332		CSADWGSHEQYF	81	0.00104241		CRSGQNYAEQF	82	0.00114774		CS_TVSNERLF	78	0.000985322		CASSQQGACNSPLYF	43	0.000547497
CASSLAGQNSPLYF	1152	0.0156145		CSAAWGQDIQYF	383	0.00500801		CSAVRDSTTGQLYF	69	0.000985363		CASSPGGDSDYTF	56	0.000903211		CASSPTGPNTEVF	86	0.00106199		CTRSAPSGTNYAEQF	65	0.00100332		CAWNLRDNTGQLYF	81	0.00104241		CSALGGF	82	0.00114774		CSAAQGHSGNALYF	78	0.000985322		CASSDVGYEQYF	43	0.000547497
CASRGQSSYEQYF	1151	0.015601		CASSRDEGYEQYF	382	0.00499493		CSAKGQGDGQYF	69	0.000985363		CASRSAGGYNYAEQF	56	0.000903211		CASSQGGRE_YF	86	0.00106199		CASSQGTSNTEVLF	64	0.000987883		CSTRQGVNTEVF	81	0.00104241		CASSRERNSNERLF	82	0.00114774		CASRRTGPNF	78	0.000985322		CGDTNSDYTF	43	0.000547497
CASSFQGANSDYTF	1143	0.0154925		CSAGLGEQTTLYF	382	0.00499493		CSTDLGRQNTLYF	69	0.000985363		CAGSPRGISGNTLYF	56	0.000903211		CSAVGDNRAPLF	86	0.00106199		CASSYVGYEQYF	64	0.000987883		CASSRDGSPYAEQF	81	0.00104241		CASSHPGQGSNERLSF	82	0.00114774		CASRTPNQDTQYF	77	0.00097269		CTSS_GGGRSYEQYF	43	0.000547497
CASSFLREGTEVF	1142	0.015479		CASSRRGAGEQYF	376	0.00491648		CSAGWGSYEQYF	69	0.000985363		CTRSAEGWGYLYF	55	0.000887082		CSASQSNYAERF	86	0.00106199		CSAELSATTEVF	64	0.000987883		CSADVRDTLYF	80	0.00102954		CSAERYNSLLYF	82	0.00114774		CASGTDRVNYAEQF	77	0.00097269		CASSLSDFNCAEQF	43	0.000547497
CASRRQGYDSPLYF	1139	0.0154383		CAWSPKDASYNSPLYF	370	0.00483802		CTCSADLGRQNTLYF	69	0.000985363		CAGSLWDIQDTQYF	55	0.000887082		CSAGQGGDTGQLYF	86	0.00106199		CSADSQDTLYF	64	0.000987883		CASGQDWEEDTQYF	80	0.00102954		CTYSADQGAETLYF	82	0.00114774		CTFSETVSNERLF	77	0.00097269		CASSFPDRGPTGQLHF	43	0.000547497
CASSLTGPSNAEVF	1136	0.0153977		CASGDTSYNSPLYF	368	0.00481187		CASGDGGGQDTRYF	69	0.000985363		CASGERQSSQNTLYF	55	0.000887082		CSADRGVAPLF	86	0.00106199		CASSDRSNSDYTF	64	0.000987883		CSTDRANTGQLYF	80	0.00102954		CASSQDRLGGSQNTLHF	82	0.00114774		CASSPDGGHGTEVF	77	0.00097269		CSARNPAPLF	42	0.000534764
CASGDLGVF	1136	0.0153977		CASSPPQGKDTQYF	368	0.00481187		CGAGQTSAETLYF	69	0.000985363		CASSQDLSCNNQAPLF	55	0.000887082		CASSFRTNSDCTF	86	0.00106199		CTSSDRPNSDYTF	64	0.000987883		CASSQGQRATQYF	80	0.00102954		CASSTRSQNTLCF	82	0.00114774		CTSGADRVNYAEQF	77	0.00097269		CASGGRQS_NTLYF	42	0.000534764
CSAPGHFNSYNSPPYF	1127	0.0152757		CASSFGQGYAEQF	367	0.00479879		CASGDAFNERLF	69	0.000985363		CASSSLWAETLYF	55	0.000887082		CASILKTNSNTEVF	85	0.00104964		CSAGAYEQYF	64	0.000987883		CSGLRDRNTEVF	80	0.00102954		CASSQARSQNALYF	82	0.00114774		CASSTWGPQDTLYF	77	0.00097269		CADEGSYNSPLYF	42	0.000534764
CASSPGTGGSAETLYF	1120	0.0151808		CASSLDWSSYEQYF	367	0.00479879		CSAGTGETPYF	69	0.000985363		CSADRLGVSQDTLYF	55	0.000887082		CSGQGAWATEVF	85	0.00104964		CSARTGNDRLF	64	0.000987883		CASSRDPGGSTQYF	80	0.00102954		CSAEWGQALLF	82	0.00114774		CASRGQSQNALYF	77	0.00097269		CSASRGQNTF	42	0.000534764
CASSLELDTLYF	1117	0.0151401		CSVGTGGSAETLYF	367	0.00479879		CTRSAGGNTEVF	69	0.000985363		CASSDGATSAETLYF	55	0.000887082		CASWVQNTLYF	85	0.00104964		CTRSAAGTKFSNERLF	64	0.000987883		CASSQDPVGGHAEQF	80	0.00102954		CASSEPGGGQNTLYF	82	0.00114774		CSVDWGASTEVF	77	0.00097269		CSAGQGANTGQRYF	42	0.000534764
CASGTGFNERLF	1113	0.0150859		CSADGGQGGQNALYF	364	0.00475957		CASSQDGAANSDYTF	69	0.000985363		CASSQDLNYNNQAPLF	55	0.000887082		CASSRGQTNSDYTF	85	0.00104964		CSAPGPGASAETLYF	64	0.000987883		CSADHNSYNSPLYF	80	0.00102954		CVSSHRDWATGQLYF	82	0.00114774		CASSLRGRGIEVF	77	0.00097269		CSADEGSYNSPHYF	42	0.000534764
CASSFRVSTEVF	1110	0.0150453		CSAERGNTGVF	362	0.00473342		CAGGMEGGREQYF	69	0.000985363		CASSDAGDSPLF	55	0.000887082		CASGESYNSPPYF	85	0.00104964		CASSQDRGQGTQYF	64	0.000987883		CAWSGGEQYF	80	0.00102954		CRASRGQDTQYF	82	0.00114774		CANMSQGRTLYCTCSETVSNERLF	77	0.00097269		CASGGKQSQNTLYF	42	0.000534764
CASSFWGINSPLYF	1108	0.0150181		CASSFRDNYAEQF	359	0.00469419		CTRSADWGDTGQLYF	69	0.000985363		CSDWGYYAEQLF	55	0.000887082		CASSGQGHPYEQYF	85	0.00104964		CARSGTTNTEVLF	64	0.000987883		CSASDNYEQYF	80	0.00102954		CSDNYEQYF	82	0.00114774		CASSPYWGNYAE_F	77	0.00097269		CSGTGRTSA_TLYF	42	0.000534764
CASSLAWGAQYF	1096	0.0148555		CASSSSGGWEQYF	357	0.00466804		CANMSQGRTLYCTCSAEGGGPSAETLYF	69	0.000985363		CASSRTGGAEVF	55	0.000887082		CAGSPGTGGYEQYF	85	0.00104964		CSAEAYERYF	64	0.000987883		CASRGLGGDE_YF	80	0.00102954		CSAAQETYAEQF	81	0.00113374		CASSLLGQGYAERF	77	0.00097269		CSASLGQNTLYF	42	0.000534764
CASSLALRQVNYAEQF	1090	0.0147742		CTRSVGTGSSAETLYF	356	0.00465496		CSADGTIGQYF	69	0.000985363		CASSDAQNTEVLF	55	0.000887082		CASRGTNNQAPLF	85	0.00104964		CTRSADPKNTEVF	63	0.000972447		CSATGDSTETLYF	80	0.00102954		CSSRGLYSNERLF	81	0.00113374		CASSLEGQPDTQYF	77	0.00097269		CSASRRQNTLYF	42	0.000534764
CASGDAKGSQNTLYF	1083	0.0146793		CASGGGAGNTLYF	354	0.00462881		CSADVNTEVF	69	0.000985363		CTSNRGDTQYF	55	0.000887082		CSVGQGNSPLYF	85	0.00104964		CSAD_GEVAETLYF	63	0.000972447		CASGPQGDPNERLF	80	0.00102954		CNALGGLAEQF	81	0.00113374		CASSPQEANSDYTF	77	0.00097269		CASDGPQGSNTEVF	42	0.000534764
CASSPPHRGRDTQYF	1075	0.0145709		CASSRDLGGRQDTQYF	353	0.00461573		CASSQQGAGNSPLYF	69	0.000985363		CASSPGGMDTEVF	55	0.000887082		CSAGHNNYTEQF	85	0.00104964		CSVERGQGTTEVF	63	0.000972447		CSADRANTEVF	79	0.00101667		CTYSADQYNAETLYF	81	0.00113374		CAGSQESRVQDTQYF	76	0.000960058		CANSHPGTEVF	42	0.000534764
CASSFWQGISNERLF	1070	0.0145031		CASSRTANTGQLYF	352	0.00460266		CSADRDSYTSPLYF	69	0.000985363		CASSLGGGSEQYF	55	0.000887082		CASSRDYAGQF	85	0.00104964		CASSDVGWEQYF	63	0.000972447		CDSSPGDWGEQYF	79	0.00101667		CTSSEGQANTGQLYF	81	0.00113374		CVSSPQGANSDYTF	76	0.000960058		CLWYYEQYF	42	0.000534764
CASRTGGGYAEQF	1063	0.0144082		CASSRGTGGALEQYF	351	0.00458958		CTYSAGREVF	69	0.000985363		CASSSQNSNERLF	55	0.000887082		CASSFRTNSDYAF	85	0.00104964		CASGDSSSGNTLHF	63	0.000972447		CASSQGHANTGQLHF	79	0.00101667		CVSSQSPGTVYEQYF	81	0.00113374		CASRRTGPNSDDTF	76	0.000960058		CASS_GGGRSYEQYF	42	0.000534764
CASSHLKDTQYF	1061	0.0143811		CAGLGEQNTLYF	349	0.00456343		CASSQDGTASSDYTF	69	0.000985363		CSAVGGKYGQYF	55	0.000887082		CSSTAAFSNEK_SF	85	0.00104964		CSAGWGADTGQLYF	63	0.000972447		CAGSQDWGAPNTGQLYF	79	0.00101667		CASSALQGANSPLYF	81	0.00113374		CASSLGQGPSQNTLYF	76	0.000960058		CASSPSGTTNTEVSF	42	0.000534764
CASSPQGADYAEQF	1046	0.0141778		CASSLARDYEQYF	348	0.00455035		CSADQTISSERLF	69	0.000985363		CDAGDSPLYF	54	0.000870954		CTSTLGGGTGRLYF	85	0.00104964		CSARTGNKRLF	63	0.000972447		CSAGDNYEQF	79	0.00101667		CASSHTANSDYTF	81	0.00113374		CASSEPGQSNEK_SF	76	0.000960058		CSGQKQDTQYF	42	0.000534764
CASGDVGVNYAEQF	1043	0.0141371		CASSDASQSYEQYF	345	0.00451113		CGADRIGSNERLF	69	0.000985363		CTRSVDIANTEVF	54	0.000870954		CASSDRDQDTQHF	84	0.00103729		CSAELSASTEVF	63	0.000972447		CSATGDKQYF	79	0.00101667		CSSRGLFSNEKLF	81	0.00113374		CASSGDLYEQCF	76	0.000960058		CSADEGSYNSPLDF	42	0.000534764
CSAGTQNSDYTF	1039	0.0140829		CSAGTGSSAETLYF	340	0.00444575		CASSREGARALYF	69	0.000985363		CASSLEGTNEGLF	54	0.000870954		CAWSLTGEVYAEQF	84	0.00103729		CSVRD_GAETLYF	63	0.000972447		CST_QGANTEVF	79	0.00101667		CSTGLDYTF	81	0.00113374		CASSQGSRVQDTQYF	76	0.000960058		CAGTSQGSDTEVF	41	0.000522032
CSADSGASAGTLYF	1036	0.0140422		CASSDNYNSPLYF	339	0.00443267		CTRSGTGGARDTQYF	68	0.000971083		CASSPGGNPDYTF	54	0.000870954		CSVGRNTGQLYF	84	0.00103729		CASRDWGSQNTLYF	63	0.000972447		CSADYISYNSPLYF	79	0.00101667		CASSQDWTGMDTQYF	81	0.00113374		CSADRVDTEVF	76	0.000960058		CASSETGVNSDYTF	41	0.000522032
CASSPQISGNTLYF	1015	0.0137576		CASSQEPSNSDYTF	338	0.0044196		CASGDESSQNALYF	68	0.000971083		CASRSTGGHNYAEQF	54	0.000870954		CASGEGTGQDTQCF	84	0.00103729		CSADAQPNSDYAF	63	0.000972447		CGAEREENSPLYF	78	0.0010038		CSAGTVHAEQF	81	0.00113374		CTSSGDLYEQYF	76	0.000960058		CASSFPTGGSYERYF	41	0.000522032
CTRSAPGHFNSYNSPLYF	1013	0.0137305		CAGSPGTAPDTQYF	331	0.00432807		CTRSDWGGQNTLYF	68	0.000971083		CGLRDRGDSDYTF	54	0.000870954		CAGSQDKTGVTEVF	84	0.00103729		CSARTTNERLLF	63	0.000972447		CASNQDLANTEVF	78	0.0010038		CASSWDRVYERYF	81	0.00113374		CASSQEGLQDTQYF	76	0.000960058		CAGSLSDFNYAEQF	41	0.000522032
CASSRDRGSQNTLYF	1012	0.0137169		CSDASQGYEQYF	329	0.00430192		CSGGQRGTEVF	68	0.000971083		CSAEGWGGYERYF	54	0.000870954		CSVGQGHSAETLYF	84	0.00103729		CSAGQNNPPLYF	62	0.000957011		CSASGTGAKQF	78	0.0010038		CTCSADQYNAETLYF	81	0.00113374		CSAGRNSPLHF	76	0.000960058		CASSPEGVGGRRSAETLYF	41	0.000522032
CASSLAINQDTQYF	1008	0.0136627		CASSNASQGYEQYF	328	0.00428884		CAWGGSYEQYF	68	0.000971083		CASSDYGTNTEVF	54	0.000870954		CTCSVGSSAETLYF	84	0.00103729		CSALGVQDTQHF	62	0.000957011		CASSQDGSPYAEQSF	78	0.0010038		CASSAVAGGHERLF	81	0.00113374		CASRTLNHDTQYF	76	0.000960058		CVSSWDSYAEQF	41	0.000522032
CASSDEGGPDTQYF	1006	0.0136356		CASGQGAGNTLYF	326	0.00426269		CSAGGNTEAF	68	0.000971083		CAWSLGQGAGAETPYF	54	0.000870954		CASSQGLGGWGAEQF	84	0.00103729		CASGEWGYNSPLYF	62	0.000957011		CASSQDGNTEVF	78	0.0010038		CAWSLGTGDNTQYF	80	0.00111975		CASSREGLSSYEQYF	76	0.000960058		CSGQNQVTQYF	41	0.000522032
CASRSEVF	1003	0.0135949		CGARWTANTEVF	325	0.00424961		CSLGESNTGQLYF	68	0.000971083		CTRSAVGGKYEQYF	54	0.000870954		CASGAPTGPNERLF	84	0.00103729		CASGDDWGIHGQYF	62	0.000957011		CAWSRAGTNSGNTLYF	78	0.0010038		CSGLEGGDTQYF	80	0.00111975		CASSDTNPDYTF	76	0.000960058		CASSDALNSDHTF	41	0.000522032
CASSFGWGQDTQYF	1003	0.0135949		CSAELGEQNTLYF	325	0.00424961		CTCSARDWGDEQYF	68	0.000971083		CASSGDRGSYEQYF	54	0.000870954		CSSSRDNQDTQYF	84	0.00103729		CSASEGSAETLYF	62	0.000957011		CASSPTNAERF	78	0.0010038		CAWSLGTGRDEPYF	80	0.00111975		CASSLGHSGNTLHF	76	0.000960058		CASSQGGERSYEQYF	41	0.000522032
CASSLGWGGYAEQF	1002	0.0135814		CASSRRTGAAQAPLF	324	0.00423654		CSAGQTGAETLYF	68	0.000971083		CASSLRGPNERLF	54	0.000870954		CGGPDYTF	84	0.00103729		CASSDSGNTGQLYF	62	0.000957011		CSGPGQANTGVF	77	0.00099093		CASSQSRDHYAELF	80	0.00111975		CASSLGDTEVF	76	0.000960058		CSGTGGRRSAETLYF	41	0.000522032
CASSSTGGGSAETLYF	997	0.0135136		CASSLDQQDTQYF	324	0.00423654		CASSDVGYEQCF	68	0.000971083		CT_SADANNERLF	54	0.000870954		CVSSGTSTEVF	84	0.00103729		CSVGQGGSNEK_SF	62	0.000957011		CSAYRGPDSDYTF	77	0.00099093		CSAARGQDTQYF	80	0.00111975		CASSDAGTGDAEPF	75	0.000947425		CSADEGSYNSPRYF	41	0.000522032
CASSLLGGSYEQYF	991	0.0134323		CASSPQTSAETLYF	323	0.00422346		CSDGTGGVSAETLYF	68	0.000971083		CSGSQDTLYF	54	0.000870954		CASGDRGSDYTF	84	0.00103729		CGGTGF	62	0.000957011		CASSQGTGAEALYF	77	0.00099093		CTSSPGTGNTEVF	80	0.00111975		CASSLEDSRNTLYF	75	0.000947425		CTSNQGGGRSYEQYF	41	0.000522032
CASGDAQGAGQLYF	981	0.0132968		CASSSGGAQDTQYF	322	0.00421039		CASGDLGGEQYF	68	0.000971083		CASSSSNEK_SF	54	0.000870954		CSAGLGGNEQYF	83	0.00102494		CTRSAGTNTGQLYF	62	0.000957011		CASRGQNYAGQF	77	0.00099093		CANMSQGRTLYCTCSDRFSNERLF	79	0.00110575		CSAVAGGASAETLHF	75	0.000947425		CTRSGTGRSSAETLYF	41	0.000522032
CASSLLHYEQYF	979	0.0132696		CASSAGTENTEVF	322	0.00421039		CSGRQAEALYF	68	0.000971083		CSTDRAGGAETLYF	54	0.000870954		CASGRDYAEQF	83	0.00102494		CRRDMNSDYTF	62	0.000957011		CSTSGTGAEQF	77	0.00099093		CSAKGAPLF	79	0.00110575		CASSPGGPYEQYF	75	0.000947425		CSGTGRSSAEALYF	41	0.000522032
CASSLPYSGNTLYF	975	0.0132154		CSVGTGSSAETPYF	321	0.00419731		CSADRSSDYTF	68	0.000971083		CASSRTGVQGTQYF	54	0.000870954		CASSDRDRDTQYF	83	0.00102494		CTWSLGGSAETLYF	62	0.000957011		CASSPGQGSQDTQYF	77	0.00099093		CASSLIGTSSDYTF	79	0.00110575		CSAERQDTGQLYF	75	0.000947425		CASSQQDIQYF	41	0.000522032
CASRQGWGSDYTF	973	0.0131883		CSAGLGE_NTLYF	321	0.00419731		CGSGETGGSTEVF	68	0.000971083		CASRSTGGYNYAGQF	54	0.000870954		CSADRAGGSEQYF	83	0.00102494		CSAVPNSDYTF	62	0.000957011		CSEGTKNTLYF	77	0.00099093		CASSLRDRGDEQYF	79	0.00110575		CSADKNTSYF	75	0.000947425		CTSRDREVF	40	0.000509299
CASSPGLGGRDQDTQYF	959	0.0129986		CASGEGGYEQCF	320	0.00418423		CSADRDSYNSPF	68	0.000971083		CASSPDKTYVQYF	54	0.000870954		CAGGPGLGNAETLYF	83	0.00102494		CASSLDLPGRGGYEQYF	62	0.000957011		CASSPGDWGELYF	77	0.00099093		CTYSALGGLAEQF	79	0.00110575		CSAPHWGQDTEYF	75	0.000947425		CTSSQGRGRSYEQYF	40	0.000509299
CASTSTGETNERLF	954	0.0129308		CASSLGTHNNQAPLF	320	0.00418423		CGGDRISNERLF	67	0.000956802		CASRPGQNTGQLHF	54	0.000870954		CASTLGGGTGQLYF	83	0.00102494		CASSQDRQDTQYF	62	0.000957011		CSAGGNSPLYF	77	0.00099093		CASSADQYNAETLYF	79	0.00110575		CASSLRDDYAEQF	75	0.000947425		CSQDTGGYAEQF	40	0.000509299
CASSRADYAEQF	953	0.0129172		CASSRTGGAYAEQF	319	0.00417116		CAGSEGQRNTEVF	67	0.000956802		CASSLLGYTGQPYF	54	0.000870954		CASSSQGSYNSPLYF	83	0.00102494		CSGTGLEQF	62	0.000957011		CSASETGAEQF	77	0.00099093		CRLEGETLYF	79	0.00110575		CANSPDRDGNTLYF	75	0.000947425		CASSQRGGRSYEQYF	40	0.000509299
CASSLTGPSNTEVLF	950	0.0128766		CASRGGGYAEQF	317	0.00414501		CTRSGQDAETLYF	67	0.000956802		CASSPRRISGNTLYF	53	0.000854825		CAGSDDRTGLSEQF	82	0.00101259		CSSSDVGYEQYF	62	0.000957011		CASSQTANTEVLF	77	0.00099093		CASSLRDWGISAETLYF	79	0.00110575		CAWGLGAFSNERLF	74	0.000934793		CASSPGTGDYNNQALLF	40	0.000509299
CASSLDQDTQYF	936	0.0126868		CAGSHPGQGQDTQYF	315	0.00411886		CSAVGLGGYAEQF	67	0.000956802		CASSFEGTNERLF	53	0.000854825		CASSPDRIYAEQF	82	0.00101259		CGAPGLGASAETLYF	62	0.000957011		CSVDPEGETEVF	77	0.00099093		CASSTTPNSDYSF	79	0.00110575		CASGDGWGANTRQLYF	74	0.000934793		CASSQNGTANSDYTF	40	0.000509299
CASSPHWGGSSYEQYF	923	0.0125106		CASSLGRDTSYEQYF	314	0.00410578		CSAERGGSTLYF	67	0.000956802		CSADRGGIAEVF	53	0.000854825		CASSLKTNSNT_VF	82	0.00101259		CASDDDQQDTQYF	62	0.000957011		CGAAGGNQDTQYF	77	0.00099093		CSAFRGQDTQYF	79	0.00110575		CSAD_GAYEQYF	74	0.000934793		CASSDARDRDKQYF	40	0.000509299
CASGGTGSSQNTLYF	921	0.0124835		CSPSGAGGYEQYF	313	0.0040927		CAGSQGLGGSAETLYF	67	0.000956802		CSASGNGQYF	53	0.000854825		CSLRGWDTRYF	82	0.00101259		CASGDAGTRSGNTLYF	62	0.000957011		CSADSGGNYAE_F	77	0.00099093		CAGSLRDREDEQYF	79	0.00110575		CASSEPGQSQNTLYF	74	0.000934793		CASSFYTGNTPYF	40	0.000509299
CASSRTGFSNERLF	894	0.0121175		CASSDRAGRDSDYTF	312	0.00407963		CSAGRGGGYEQYF	67	0.000956802		CASSMGTLNERLF	53	0.000854825		CASSPGRGARGQNTLYF	82	0.00101259		CSARTNTEVF	62	0.000957011		CSAEALNQDTQHF	77	0.00099093		CASSQARNQNTLYF	78	0.00109175		CSADTWGGGDTQYF	74	0.000934793		CASGYRASAETLYF	40	0.000509299
CASSSLTGISNERLF	886	0.0120091		CSALGGNTLYF	312	0.00407963		CGAGGGDTEVF	67	0.000956802		CSAVNQDTQCF	53	0.000854825		CSVDQSGGGTQYF	82	0.00101259		CSADWGADAGQLYF	62	0.000957011		CASSTGDWGEQYF	77	0.00099093		CASGGGQGANSPLYF	78	0.00109175		CSADGSGNTLYF	74	0.000934793		CASRSRQEGTEVF	40	0.000509299
CASSTYTGQLYF	885	0.0119955		CAWSLTGCF	312	0.00407963		CSPRGISNERLF	67	0.000956802		CASSDYRTNAEVF	53	0.000854825		CSSSLKTNSNTEVF	82	0.00101259		CSAVGTANTEVF	62	0.000957011		CSAGGDPPLYF	77	0.00099093		CAWSHISQILYNCESGSF	78	0.00109175		CAGSQDTGRSDYTF	74	0.000934793		CTSSQGGERSYEQYF	40	0.000509299
CASSLRGGARSAETLYF	884	0.011982		CASSPGLGGSYEQYF	308	0.00402733		CASGNARGAENSDYTF	67	0.000956802		CSANGRNTEVF	53	0.000854825		CASSPGWGGYEQYF	82	0.00101259		CTRSANDNPF	62	0.000957011		CANSLRGDTEVF	77	0.00099093		CASDALGGRGEQYF	78	0.00109175		CASSPDRAEQYF	74	0.000934793		CANSRTINQDTQYF	40	0.000509299
CSERTESAETLYF	876	0.0118736		CASSRESRNYAEQF	304	0.00397502		CSAQGQGDEQYF	67	0.000956802		CASSLGQSSYEQYF	52	0.000838696		CASSFGTGGAGSPPYF	82	0.00101259		CSAGGTNAGQLYF	61	0.000941576		CSEHTSQNTLYF	76	0.000978061		CSLRDREDEQYF	78	0.00109175		CASGQEEYYAEQF	74	0.000934793		CASGDATGRYAEQF	40	0.000509299
CASSFTGNTEVF	868	0.0117651		CASSSDWGYEQYF	304	0.00397502		CASGQGRDTEVSF	67	0.000956802		CAWGLGQGAGAETLYF	52	0.000838696		CGAVANTGQLYF	82	0.00101259		CGAERGQGTTEVF	61	0.000941576		CSTRYNSPLYF	76	0.000978061		CAGSHTTNSDYTF	78	0.00109175		CASKRTGPNSDYTF	74	0.000934793		CTRSQGGGRSYEQYF	40	0.000509299
CASSLTGPSNTEAF	862	0.0116838		CASSLEGNSAETLYF	303	0.00396195		CSVQESCSDYTF	66	0.000942522		CGEQGRDTEVF	52	0.000838696		CAISLKTNSNTEVF	82	0.00101259		CSAAPSTEVF	61	0.000941576		CASRPLGGYAEQYF	76	0.000978061		CSANSYNSSLYF	78	0.00109175		CSADEQGADTGVF	74	0.000934793		CASGGSQSQNTLYF	40	0.000509299
CASSSTGFQNTLYF	858	0.0116296		CSEDSGNTLCF	301	0.0039358		CSAGGGDTEAF	66	0.000942522		CASSQGWGPQDTQYF	52	0.000838696		CASSLDRANTEVYF	82	0.00101259		CTCSGQGRNSPLYF	61	0.000941576		CASSQDWEEGTQYF	76	0.000978061		CSTARETYAEQF	78	0.00109175		CSAPHWGQDTEVF	74	0.000934793		CTSSQGGTANSDYTF	40	0.000509299
CASSQTGGAF	843	0.0114263		CASSFQQGYAEQF	299	0.00390964		CSADMGGGPYEQYF	66	0.000942522		CASSLGTGSHSPLYF	52	0.000838696		CSLEIQSSEAGDSALYLRASSLRANSDYTF	82	0.00101259		CASGDLGGNYAEQF	61	0.000941576		CTYSAEALNQDTQYF	76	0.000978061		CSDRVSNERLF	78	0.00109175		CASSQETINQGTQYF	74	0.000934793		CSGPNQDTQYF	40	0.000509299
CASGDAGGGEQYF	841	0.0113992		CASSSGQGAQDEQYF	299	0.00390964		CASSQDQQGAGQLYF	66	0.000942522		CASSDGDWAETPYF	52	0.000838696		CAGSPTGGSYEQYF	82	0.00101259		CTRSAGGASAETLYF	61	0.000941576		CTSSGDTQAQHF	76	0.000978061		CNSRGLFSNERLF	78	0.00109175		CASSEPGQPNERLF	74	0.000934793		CASSQQDTEVF	40	0.000509299
CASSPDTNTEVF	833	0.0112907		CASSPGLGGYAEQF	297	0.00388349		CSGDRISNERLLF	66	0.000942522		CSADRAGDAETLYF	52	0.000838696		CASSDTRGPSAETLYF	82	0.00101259		CTCSGTGGPSAETLYF	61	0.000941576		CASSQDSGGSTQYF	76	0.000978061		CASSTTPNF	78	0.00109175		CSAAQDHSGNTLYF	73	0.000922161		CASSPGGGRSYEQYF	40	0.000509299
CASAPNSYNSPLYF	832	0.0112772		CASSRDGLGSQDTQYF	293	0.00383119		CSLGQSNTEVF	66	0.000942522		CASSRTGYTEVF	52	0.000838696		CSAGRNTEVF	82	0.00101259		CGANDNPF	61	0.000941576		CNATGDEQYF	76	0.000978061		CANSLRDREDEQYF	78	0.00109175		CSAGANTEVSF	73	0.000922161		CSASRGQNPLYF	40	0.000509299
CSAPGHFNSHNSPLYF	823	0.0111552		CGARELGVNYAEQF	292	0.00381811		CGAGDERLF	66	0.000942522		CASSLWDIQDAQYF	52	0.000838696		CSDRDQDTQYF	82	0.00101259		CASGQAGQHNNQAPLF	61	0.000941576		CASCPGDWGEQYF	76	0.000978061		CASNQSPGTVYEQYF	78	0.00109175		CAGSPGQGAYEQYF	73	0.000922161		CSQTGVNQAPLF	40	0.000509299
CASRTGTGENTLYF	822	0.0111416		CASSQGADTEVF	290	0.00379196		CSGGLSYGQYF	66	0.000942522		CSADHGGTEVLF	52	0.000838696		CGAVGDQDTQYF	82	0.00101259		CSADRNSGDTLYF	61	0.000941576		CSADDNYEQYF	76	0.000978061		CASFLAGQLYF	77	0.00107776		CSAAQGRSGNTLYF	73	0.000922161		CASSGPQGSNTEVF	40	0.000509299
CASSLGGSQDTQYF	818	0.0110874		CSAGLGEQNILYF	290	0.00379196		CSSGDCGQYF	66	0.000942522		CASSKTAYAEQF	52	0.000838696		CSVDRGAAPLF	82	0.00101259		CSASGGSVETLYF	61	0.000941576		CAGSQGQAQYF	76	0.000978061		CASSLRDWGTSAEPLYF	77	0.00107776		CAGSPRTGGLF	73	0.000922161		CASGDRGTGNTEVF	40	0.000509299
CASSLDGRDTEVF	817	0.0110738		CASSFDRGTSAETLYF	289	0.00377889		CNAERGGNTLYF	66	0.000942522		CASGSTGGYNYAEQF	52	0.000838696		CTCSAGHNNYAEQF	82	0.00101259		CSASGGSTETLYF	61	0.000941576		CSAGWDISYNSPLYF	76	0.000978061		CTYSAARETYAEQF	77	0.00107776		CSAPGGRNIGQLYF	73	0.000922161		CASGGRHSQNTLYF	40	0.000509299
CSAPGHLNSYNSPLYF	813	0.0110196		CASSADWGDEQYF	288	0.00376581		CANGERQGNEQYF	66	0.000942522		CSEDANNERLF	52	0.000838696		CSADTGAEQSF	82	0.00101259		CASGAATEQLF	61	0.000941576		CASSQGLGGGGAEQF	76	0.000978061		CSTDQGAETLYF	77	0.00107776		CSVVWGDEQYF	73	0.000922161		CASSLAGGALEQYF	39	0.000496567
CASSWANYAEQF	813	0.0110196		CSAGDRGCEQYF	287	0.00375274		CSAAQANTEVF	66	0.000942522		CASSFRDWGYAERF	52	0.000838696		CASSIKTNSNTEVF	82	0.00101259		CSAAGAPYEQYF	61	0.000941576		CSSTGTGGGQNTLCF	76	0.000978061		CANMSQGRTLYCTCRPGQNYAEQF	77	0.00107776		CASGANRVNYAEQF	73	0.000922161		CASSGTEVNSDYTF	39	0.000496567
CASSRDWGGYAEQF	806	0.0109248		CSAGRGEQNTLYF	286	0.00373966		CSAVQDRQLGSMTEK_SF	66	0.000942522		CSAGEGQGAGNTLYF	52	0.000838696		CSAGRFSYEQYF	81	0.00100024		CTRSAATGGFSNERLF	61	0.000941576		CNADGAEQF	76	0.000978061		CASSQSPGTVYEQCF	77	0.00107776		CANSGDLYEQYF	73	0.000922161		CASGDTNF	39	0.000496567
CASRGTGGYAEQF	804	0.0108976		CASGGAGVSNERLF	283	0.00370043		CASSRDQRGEQYF	66	0.000942522		CASSPDNTYEQYF	52	0.000838696		CSADLGGNEQCF	81	0.00100024		CSAPGLGASAGTLYF	61	0.000941576		CSAPGAVAEQF	76	0.000978061		CASSPVAERF	77	0.00107776		CANSQGGTGVDTQYF	73	0.000922161		CASSQHDTQYF	39	0.000496567
CGAPGHFNSYNSPLYF	803	0.0108841		CASSSWGGADEQYF	283	0.00370043		CSDPGGAGQDTQYF	66	0.000942522		CASPSSNERLF	52	0.000838696		CTSGDRADYTF	81	0.00100024		CSSREDTQYF	61	0.000941576		CATGDSAETLYF	76	0.000978061		CASSDWDTEVF	77	0.00107776		CSAGWNSPLYF	73	0.000922161		CASSRTINQDTLYF	39	0.000496567
CASSLVLGRLGAETLYF	803	0.0108841		CAWSGQDSDYTF	279	0.00364813		CASRQASTGQLYF	66	0.000942522		CASGDAQNTEVF	52	0.000838696		CASGGRQYNSPLYF	81	0.00100024		CTRSGGRNTEVF	60	0.00092614		CASSRDRGSSYEQYF	76	0.000978061		CRDNHEQYF	77	0.00107776		CSDGGNYAEQF	73	0.000922161		CASSWDSYVEQF	39	0.000496567
CASSPGTANTEVF	783	0.010613		CASRGQGAEVF	275	0.00359583		CASGGGLGGYEQYF	66	0.000942522		CAWTRGVNYAEQF	52	0.000838696		CASSDARGPSVETLYF	81	0.00100024		CSAGRVEEVF	60	0.00092614		CNADVGGLYAEQF	76	0.000978061		CASSHPGQNNSPLYF	77	0.00107776		CSADPGHNTLHF	73	0.000922161		CASSLSDSNYAEQF	39	0.000496567
CASSLTGSGQLYF	780	0.0105723		CASSPGGRAEQF	270	0.00353045		CSAGQYNPPLYF	65	0.000928241		CASSAGPFNQDAQYF	52	0.000838696		CSAEGQDTRYF	81	0.00100024		CASSRDRGAPLF	60	0.00092614		CSARYNSPLHF	76	0.000978061		CAGGDATFSNERLF	77	0.00107776		CASGPSNTEVF	73	0.000922161		CARGGRQSQNTLYF	39	0.000496567
CASRGGISNERLF	768	0.0104097		CASSRDPQGVSNERLF	265	0.00346507		CSGGHTSAETPYF	65	0.000928241		CASSLETSAKTLYF	52	0.000838696		CTCRVSGGVTEVF	81	0.00100024		CTRSAVSNSDYTF	60	0.00092614		CASGQGGDQDTQYF	76	0.000978061		CTWSHWGNYAEQF	77	0.00107776		CASNQGGLQDTQYF	73	0.000922161		CTSRSGQEGTEVF	39	0.000496567
CASSLTGPPNTEVF	768	0.0104097		CASSLTGGNTGQLYF	264	0.00345199		CRADQGRQNTLYF	65	0.000928241		CASSDYRANTEVF	52	0.000838696		CASSPGTANSDYTF	81	0.00100024		CASSDRPNSDYIF	60	0.00092614		CASIPGDWGEQYF	75	0.000965191		CASARDNYAGQF	77	0.00107776		CASSLDPSAETLHF	73	0.000922161		CASSPGTGDYSNQAPPF	39	0.000496567
CASSRDGGETLYF	736	0.00997595		CSADGTLNQGTQYF	263	0.00343892		CASSQDGTADSDYTF	65	0.000928241		CSADANNERLYF	52	0.000838696		CSAGLGGQDTQYF	81	0.00100024		CTRSGTGGGYAEQF	60	0.00092614		CASSREQGNSYEQYF	75	0.000965191		CNAEGAPLF	77	0.00107776		CASSQSPGWTEVLF	73	0.000922161		CASDDTNSDYTF	39	0.000496567
CSARLGWEQCF	721	0.00977264		CASSDRQGEVF	262	0.00342584		CSAGGGDTEVLF	65	0.000928241		CAVNQDTQYF	51	0.000822567		CSADAGAEQF	81	0.00100024		CSAGRDGQNTLYF	60	0.00092614		CASSQDLAGYERYF	75	0.000965191		CASSPGRNNSPLYF	77	0.00107776		CASSTWGSQNTLYF	73	0.000922161		CASSQEGVGGGRSAETLYF	39	0.000496567
CASSLFRGRTGQLYF	702	0.00951511		CASRDASQGYEQYF	262	0.00342584		CSADRGGNERLF	65	0.000928241		CASSLTHAEQF	51	0.000822567		CSAGQYNSPLHF	81	0.00100024		CSAGGPYEQYF	60	0.00092614		CASSLPGRDN_AQHF	75	0.000965191		CASSLRDWGTSAKTLYF	77	0.00107776		CSAGRNSPF	73	0.000922161		CARSQGGGRSYEQYF	39	0.000496567
CASSDSRIQSTLYF	701	0.00950155		CASGQEGVGNTEVF	260	0.00339969		CASGVRNTLYF	65	0.000928241		CASSDAQ_CVAPFTLQSSYEQYF	51	0.000822567		CASSPNRDTQYF	81	0.00100024		CSAGTNTEVLF	60	0.00092614		CSADPGGNYAEQF	75	0.000965191		CASSFRDREDEQYF	76	0.00106376		CSAGRNPPLYF	73	0.000922161		CSAGQGANTGQLYFGWSHISQILQHCQL_AF	39	0.000496567
CSAPGRFNSYNSPLYF	699	0.00947444		CATGTGGLQDTQYF	258	0.00337354		CTRSAGTSNTGQLYF	65	0.000928241		CSGDRSYEQHF	51	0.000822567		CASSLKPNSNTEVF	81	0.00100024		CSADSQNALYF	60	0.00092614		CTYSADSGGNYAEQF	75	0.000965191		CANSLTGVISNERLF	76	0.00106376		CASGTLNQDTQYF	73	0.000922161		CASGGRTLYCTCSASRGQNTLYF	39	0.000496567
CASSLTGPSSTEVF	690	0.00935245		CASGRTGGSGNTLYF	257	0.00336046		CASGDAANERLF	65	0.000928241		CASSRTGVQDAQYF	51	0.000822567		CSGDNSPNTLYF	81	0.00100024		CSAEPSANTEVF	60	0.00092614		CASSQGLGGPAEQF	75	0.000965191		CASSQDRTGIDTQYF	76	0.00106376		CTSSQGGLQDTQYF	72	0.000909528		CASGFPTGGSYEQYF	39	0.000496567
CTRSADQGAGSAETLYF	688	0.00932535		CASSSAHEQYF	257	0.00336046		CTRSAGGGVAEQF	65	0.000928241		CASSAQGASSDYTF	51	0.000822567		CASGEGTGQDTRYF	80	0.000987894		CSAELGANTEVF	60	0.00092614		CSADSGGNYVEQF	75	0.000965191		CASSQARGAGQF	76	0.00106376		CARGHYEQYF	72	0.000909528		CSADEGSNNSPLYF	39	0.000496567
CGARDVQGAGAETLYF	687	0.00931179		CASSRGTTNERLF	254	0.00332124		CSSRDRDWGYEQYF	65	0.000928241		CASRSTGGYNYTEQF	51	0.000822567		CGVSGGVTEVF	80	0.000987894		CSADAQPNSDCTF	60	0.00092614		CSGGTGRPGQLYF	75	0.000965191		CTSSGQGAEVF	76	0.00106376		CASSLGQGGSSDYTF	72	0.000909528		CASGDTTGGYAEQF	39	0.000496567
CASSPDWEGQLYF	674	0.00913559		CASSFLTGRDEQYF	254	0.00332124		CASSDNQGTYERYF	65	0.000928241		CDSSDAGDSPLYF	51	0.000822567		CASSLDSANTEVF	80	0.000987894		CSGGGYEQYF	60	0.00092614		CASSLRDDTEVF	75	0.000965191		CASSLRDWGTSAETRYF	76	0.00106376		CAWSRGAQDTQYF	72	0.000909528		CSARNQGANTGQLYF	39	0.000496567
CAGSLTGPSNTEVF	671	0.00909492		CTSSAGLGEQNTLYF	254	0.00332124		CAWSPGGVNQAQHF	65	0.000928241		CSADQGWGGWQNTLYF	51	0.000822567		CASSGQGRSYEQYF	80	0.000987894		CGALGDNYAEQF	60	0.00092614		CASSQDPGGGTQYF	75	0.000965191		CASSQDQNTEVLF	76	0.00106376		CGAEGQQAQHF	72	0.000909528		CASSPIASNERLF	39	0.000496567
CASSLGTEYNSPLYF	667	0.00904071		CASSDASQGYKQYF	252	0.00329508		CASSDAQKDTGVF	65	0.000928241		CASSDEGDERYF	51	0.000822567		CSSSRNNRDTQYF	80	0.000987894		CASSDVGQNTLYF	60	0.00092614		CAGSQGHANTGQLYF	75	0.000965191		CASFTTPNSDYTF	76	0.00106376		CSSRRGANTEVF	72	0.000909528		CASGHRPSAETLYF	39	0.000496567
CASSHKQGANSDYTF	664	0.00900004		CRAGLGEQNTLYF	252	0.00329508		CASGGGRSNTEVF	65	0.000928241		CASSDAGDSPVYF	51	0.000822567		CASNQGGREQYF	80	0.000987894		CASSLGHISGNTLYF	60	0.00092614		CAGSPGLGGPAEQF	75	0.000965191		CASSLTGVISNERLLF	76	0.00106376		CTWSAPHWGQDTQYF	72	0.000909528		CASSGLGYAEQF	39	0.000496567
CASSLRTKNNQAPLF	663	0.00898649		CASGQQDTQYF	248	0.00324278		CASSRDWGETYAERF	65	0.000928241		CTFSADANNERLF	51	0.000822567		CSASQSNYAEQLF	80	0.000987894		CTSGGQGNTEVF	59	0.000910704		CASSQGTGAGTLYF	75	0.000965191		CASSQSRDHDAEQF	76	0.00106376		CASSQGWGYEQYF	72	0.000909528		CSAD_GSYNSPLYF	38	0.000483834
CASSLRGQNTLYF	663	0.00898649		CASSHPGQRYNSPLYF	243	0.0031774		CSGTEGVSQNTLYF	65	0.000928241		CASSPDRSYEQYF	51	0.000822567		CGAGQRNSPLYF	80	0.000987894		CTGSALGVQDTQYF	59	0.000910704		CSGTGDSAETLYF	75	0.000965191		CASSRDRVYEQYF	76	0.00106376		CASRQTGSETPYF	72	0.000909528		CASSDARDRDEQF	38	0.000483834
CASTGTGGYEQYF	655	0.00887806		CASGLGGRNTLYF	241	0.00315125		CASSQGQRGEQYF	65	0.000928241		CAGSLETGGYEQYF	51	0.000822567		CSAGTYEQYF	80	0.000987894		CSADPKNTEVLF	59	0.000910704		CAWSLRDNIGQLYF	75	0.000965191		CSTGTVYAEQF	75	0.00104976		CASSQGRTGVDTQYF	72	0.000909528		CASNGTGVNSDYTF	38	0.000483834
CASSSRNSDYTF	654	0.0088645		CSAEGGSSYEQYF	239	0.0031251		CSSGDRDWGDEQYF	65	0.000928241		CASSDAGDSRLYF	51	0.000822567		CSAGQLSSERLF	80	0.000987894		CSAGTNAGQLYF	59	0.000910704		CASSQDWGAPSTGQLYF	75	0.000965191		CSTDQYNAETLYF	75	0.00104976		CSADTGRNSPLYF	72	0.000909528		CSLTGVNQAQLF	38	0.000483834
CASGTGGSQNTLYF	649	0.00879673		CSVGTGSSAETLHF	237	0.00309895		CSAGDNTEVLF	65	0.000928241		CSVVNQDTQYF	51	0.000822567		CASSDRDQDTRYF	80	0.000987894		CSADRDSYAEQF	59	0.000910704		CSGTANTKVF	75	0.000965191		CSAVAGSHERLF	75	0.00104976		CASSGDLCEQYF	72	0.000909528		CASSDALNPDYTF	38	0.000483834
CASSLGRGSPLYF	648	0.00878318		CTCSAGLGEQNTLYF	235	0.0030728		CSAGYQNALYF	65	0.000928241		CSAEGGEAF	50	0.000806438		CTSTLGGDTGQLYF	80	0.000987894		CASSLDLPGLGGYEQCF	59	0.000910704		CSKRDRGGETLYF	75	0.000965191		CASSQARGAEQSF	75	0.00104976		CASSQERVGYAEQF	72	0.000909528		CASSQGGGRSYKQYF	38	0.000483834
CASSLTWGAKYAEQF	639	0.00866119		CSRGLGGR_DTQYF	233	0.00304665		CTRSAGGLGQDTQYF	65	0.000928241		CASSLNANSDHTF	50	0.000806438		CGADRGQNTLYF	79	0.000975546		CANSDRPNSDYTF	59	0.000910704		CVSSQGHANTGQLYF	75	0.000965191		CANMSQGRTLYCTCSAERYNSPLYF	75	0.00104976		CASGRYEQYF	72	0.000909528		CASSQQGGYNSPLYF	38	0.000483834
CASSHWGTYEQYF	638	0.00864763		CGASHTNSDYTF	233	0.00304665		CSADQGNTEVF	65	0.000928241		CSADGRNIEVF	50	0.000806438		CGADGANTEVF	79	0.000975546		CSADRGWGAWLAEQF	59	0.000910704		CSADLVNTLYF	75	0.000965191		CASGAWTGQNTLCF	75	0.00104976		CASRRTGSETLYF	72	0.000909528		CAGQGANTGQLYF	38	0.000483834
CSAPGHFNPYNSPLYF	636	0.00862052		CASSLKADANTEVF	233	0.00304665		CTRSADGTIEQYF	65	0.000928241		CASSHGWGGYEQYF	50	0.000806438		CANMSQGRTLYCTCSAAQNTEVF	79	0.000975546		CASGDAVGRNPDYTF	59	0.000910704		CASSRDLAGYEQYF	75	0.000965191		CASSHLRGAYTEVLF	75	0.00104976		CASSQGTGRSDYTF	71	0.000896896		CASSWNSYAEQF	38	0.000483834
CASGLTGPSNTEVF	634	0.00859342		CSVGTGSSAEALYF	232	0.00303357		CTCSADRDSYNSPLYF	64	0.00091396		CSGDGSYEQYF	50	0.000806438		CAGSLRANSDYTF	79	0.000975546		CASSQGRNNQAPLF	59	0.000910704		CASSPGLGGPAERF	74	0.000952322		CASSLQGRDTEAF	75	0.00104976		CASSQGDWGYEQYF	71	0.000896896		CARSPTASNERLF	38	0.000483834
CASSLAGPSNTEVF	633	0.00857986		CASSGRGRAPLF	232	0.00303357		CSGTGGASQNTLYF	64	0.00091396		CASSQDLSYNNQVPLF	50	0.000806438		CSAVDRGLDTRYF	79	0.000975546		CSARTRNERLF	59	0.000910704		CSAGKAGNTPYF	74	0.000952322		CSTTPNSDYTF	75	0.00104976		CASSPYWGDYAEQF	71	0.000896896		CASSQEGVGGRRSAETL_F	38	0.000483834
CASSQGLGGAHYAEQF	613	0.00830878		CASSLRGNYAEQLF	232	0.00303357		CTRSAQGSTGQLYF	64	0.00091396		CAWRRTGPEQCF	50	0.000806438		CSPGPGGQDTQYF	79	0.000975546		CSAPGGTSQNTLCF	59	0.000910704		CASSQEQGNSYE_YF	74	0.000952322		CASSQARSQNTLHF	75	0.00104976		CASSQAGGWEQCF	71	0.000896896		CVSSQDGGEVF	38	0.000483834
CASSLDGEENTEVF	605	0.00820034		CSHLFNNSYNSPLYF	232	0.00303357		CASDDASNERLF	64	0.00091396		CGERDWGHQDTQYF	50	0.000806438		CASSFQNTEVF	79	0.000975546		CTRSGTGF	59	0.000910704		CASSQDRNAEVF	74	0.000952322		CAWSLGTGKDEQYF	75	0.00104976		CASSRERVDYAEQF	71	0.000896896		CASTSQGSDTEVSF	38	0.000483834
CASSSRTGSSYEQYF	601	0.00814612		CGAREGAGNTLYF	232	0.00303357		CAWRGTGGAREQYF	64	0.00091396		CAWKYRGAETLYF	50	0.000806438		CASGLGTANSDYTF	79	0.000975546		CSADRTNTEVF	59	0.000910704		CSANRANTGQLYF	74	0.000952322		CSAVRDEQYF	75	0.00104976		CASSLEGQQDPQYF	71	0.000896896		CTSGDRGTENTEVF	38	0.000483834
CASSPGTGDYAEQF	600	0.00813257		CASSLGTSAETLYF	231	0.00302049		CASSQVSQNNQAPPF	64	0.00091396		CASGTGAGQF	50	0.000806438		CASSRGQGDTEVF	79	0.000975546		CASGGGLGGAETLYF	59	0.000910704		CSGRTGGPGQLYF	74	0.000952322		CASGQRQGAEQF	75	0.00104976		CAGSPGGQNTLYF	71	0.000896896		CASRDKEVF	38	0.000483834
CSAPGHSNSYNSPLYF	597	0.00809191		CASSLGNTGQLYF	229	0.00299434		CTRSARTGGVNYAEQF	64	0.00091396		CNADRAGGAETLYF	50	0.000806438		CASSDVGEVLF	79	0.000975546		CSATGPNERSF	59	0.000910704		CAGSQGTGAETLYF	74	0.000952322		CVSSHPGQGSNERLF	75	0.00104976		CASGADRVDYAEQF	71	0.000896896		CSGTWRTSAETLYF	38	0.000483834
CASRPGQGAAEQF	593	0.00803769		CASNDASQGYEQYF	225	0.00294204		CSDWGGAQGTQYF	64	0.00091396		CAGSLGANYAEQF	50	0.000806438		CTSGEGTGQDTQYF	79	0.000975546		CSATNTEAF	59	0.000910704		CAGRGLGGDEQYF	74	0.000952322		CASSGINQDTPYF	74	0.00103577		CASRVPYNSPLYF	71	0.000896896		CASGHRANAETLYF	38	0.000483834
CASSRDQGASAETLYF	593	0.00803769		CSAERGDTEVF	224	0.00292896		CSAGGGDAEVF	64	0.00091396		CSADGGQGAGNTLYF	50	0.000806438		CSATGNNQAPLF	78	0.000963197		CGADRDGQNTLYF	59	0.000910704		CTCSAPGADAEQF	74	0.000952322		CASSLRNWGTSAETLYF	74	0.00103577		CSADTGGNSLLYF	71	0.000896896		CSATRGQNTLYF	37	0.000471102
CGARDKISNERLF	590	0.00799703		CASSDALQGYEQYF	223	0.00291589		CSAGNQDTRYF	64	0.00091396		CASGDAQ_CVASFTLQSSYEQYF	50	0.000806438		CASGLTGAGAEQF	78	0.000963197		CSTGPDTEVF	59	0.000910704		CSVSGGYNQAQHF	74	0.000952322		CASSQSPGTVHEQYF	74	0.00103577		CAGSHQGPQDTQYF	71	0.000896896		CASSQGGGRAYEQYF	37	0.000471102
CASSLAVNQDTQYF	587	0.00795636		CASSLSGYAEQF	223	0.00291589		CTRSGRQAETLYF	64	0.00091396		CAGSSSNERLF	50	0.000806438		CSAGHNNYVEQF	78	0.000963197		CTRSAGQGPNERLF	59	0.000910704		CASSQDWEEDTQHF	74	0.000952322		CSDKFSNERLF	74	0.00103577		CASSPYWGNYAEQSF	71	0.000896896		CASSQDGTANSDSTF	37	0.000471102
CSAPGHFNSYNSPLHF	570	0.00772594		CGASWGAETLYF	223	0.00291589		CAGSQALTGQLYF	64	0.00091396		CVSSGTGYTEVF	50	0.000806438		CSAPGGYEQCF	78	0.000963197		CSAAAGGFSNERLF	59	0.000910704		CSSTGTEGGQNTLYF	74	0.000952322		CASSQSPGTVYE_YF	74	0.00103577		CASGPRTGGLF	71	0.000896896		CASSQGRGRSYEQYF	37	0.000471102
CASGGYRGGQNTLYF	570	0.00772594		CASSQEQISNEGLF	220	0.00287666		CSAGTSQDTQYF	64	0.00091396		CASGERQFSQNTSYF	50	0.000806438		CRGPDCTF	78	0.000963197		CASSQGTSSTEVF	59	0.000910704		CASSPGTGCYEQYF	74	0.000952322		CASSHPRQGSNERLF	74	0.00103577		CARSLGAFSNERLF	71	0.000896896		CASSHPGTKVF	37	0.000471102
CASSRRQGKNTLYF	560	0.0075904		CGARRQGAGEQYF	217	0.00283743		CSAGDNTEAF	64	0.00091396		CAGSLDWAGSYEQYF	50	0.000806438		CSPSRNNQDTQYF	78	0.000963197		CASGDPGQGAEVSF	59	0.000910704		CASSQDPAGGHTEQF	74	0.000952322		CASNALQGWAETLYF	74	0.00103577		CASRRTGTSQNTLYF	71	0.000896896		CASTSQGSDTGVF	37	0.000471102
CASSQDLTGAGAETLYF	558	0.00756329		CSAGLGEQHTLYF	215	0.00281128		CSADINTGVF	64	0.00091396		CASGEQGANSDYTF	49	0.00079031		CASSRGRGERLF	78	0.000963197		CTRSGDGYEQYF	59	0.000910704		CASSPGDWGEHYF	74	0.000952322		CSASSGQDTQYF	74	0.00103577		CASSLDRGTNTGQLYF	70	0.000884264		CSADEGSF	37	0.000471102
CASSDAGAGNSDYTF	557	0.00754974		CSSSQSRDTLYF	214	0.00279821		CSADRVGSNERLF	64	0.00091396		CASSRDKTYGQYF	49	0.00079031		CMALSDERLF	78	0.000963197		CSAELSADTEVF	59	0.000910704		CAWSRVGANSGNTLYF	74	0.000952322		CASSHRDWATGQF	74	0.00103577		CASSLEDANTEVLF	70	0.000884264		CASSWDNYAEQF	37	0.000471102
CASSGDWGGIYAEQF	545	0.00738708		CSAETESQSTLYF	212	0.00277206		CSADWGDTGQLHF	64	0.00091396		CSAEGWGGYEQHF	49	0.00079031		CASSQTGGEGAEVF	78	0.000963197		CASGGLGNTEVF	59	0.000910704		CASSRDWEEDTQYF	73	0.000939453		CAWSLETGDDTQYF	74	0.00103577		CSSRGGANTGVF	70	0.000884264		CASSLEGVGGRRSAETLYF	37	0.000471102
CGAIQGNGNTLYF	545	0.00738708		CASSDATQGYEQYF	212	0.00277206		CSAGREVLF	64	0.00091396		CSAEPISNEK_SF	49	0.00079031		CAGQLSNERLF	78	0.000963197		CTSGDGTNYAEQF	59	0.000910704		CSATGDVQYF	73	0.000939453		CNADQGAETLYF	74	0.00103577		CASGDARNIGQLYF	70	0.000884264		CASNHPGTEVF	37	0.000471102
CAGSSGTGVQDTQYF	541	0.00733287		CASSLYPQGRYAEQF	211	0.00275898		CTYSPGQSNTEVF	64	0.00091396		CSGSRNTLYF	49	0.00079031		CASSQGGTIF	78	0.000963197		CSAATGGSSNERLF	58	0.000895269		CASSQDGSPYAERF	73	0.000939453		CSGLGGGDT_YF	74	0.00103577		CASSPRTGGSYGQYF	70	0.000884264		CTNSQGGGRSYEQYF	37	0.000471102
CGARVRTGGYEQYF	540	0.00731931		CGARDSSAETLYF	210	0.0027459		CSVDINTEVF	64	0.00091396		CSADHGDTEVF	49	0.00079031		CTYSAGQYNSPLYF	78	0.000963197		CSAGQGDERLF	58	0.000895269		CANSQDLANTEVF	73	0.000939453		CSPRQLGSMTEK_SF	74	0.00103577		CASFLRGRGTEVF	70	0.000884264		CASSQEGVGGRSSAETLYF	37	0.000471102
CASNLTGPSNTEVF	537	0.00727865		CASGDARDRDGNTLYF	210	0.0027459		CARGRDQDTQYF	64	0.00091396		CSEQGRNTEVF	49	0.00079031		CASRDTNSQAPLF	78	0.000963197		CSANDDPF	58	0.000895269		CSADVGGLYVEQF	73	0.000939453		CASSPETGNTEVF	74	0.00103577		CASSQSPGRTEVF	70	0.000884264		CASSRTINQDIQYF	37	0.000471102
CGARDGGGTQYF	535	0.00725154		CSVGAGSSAETLYF	209	0.00273283		CTRSADGGRAEQF	64	0.00091396		CASSQRDSNERLF	49	0.00079031		CAGSRDYAEQF	78	0.000963197		CSAAGNTLYF	58	0.000895269		CTYSADVGGLYAEQF	73	0.000939453		CASSHRD_ATGQLYF	74	0.00103577		CSAD_GGAAETLYF	70	0.000884264		CASSDRGTENTEVF	37	0.000471102
CGASLGAYEQYF	527	0.00714311		CASSDVGATEVF	207	0.00270668		CASSGLGGEQYF	63	0.00089968		CAWAWGVNYAEQF	49	0.00079031		CASSLDRIYAEQLF	78	0.000963197		CASGPGLGAS_NTLYF	58	0.000895269		CTSSQDLANTEVF	73	0.000939453		CAWSFGTGRDEQYF	74	0.00103577		CASSGAGGALEQYF	70	0.000884264		CASSDARVRDEQYF	37	0.000471102
CASSLTGPSDTEVF	520	0.00704823		CSAERGSTEVF	207	0.00270668		CSRGGYAEQF	63	0.00089968		CTRSADGGAASDYTF	49	0.00079031		CSADAYEQYF	78	0.000963197		CASGDGGALGQYF	58	0.000895269		CASSPGTGSSYEQYF	73	0.000939453		CRRTPYEQYF	74	0.00103577		CRTGG_DTQYF	70	0.000884264		CASSHIWGYEQF	37	0.000471102
CSAPGHFNSYNPPLYF	514	0.0069669		CSAGLGAQNTLYF	204	0.00266745		CASGQDQRGEQYF	63	0.00089968		CSERDWGRQDTQYF	49	0.00079031		CRADQEAPLF	78	0.000963197		CGAPSGTNYAEQF	58	0.000895269		CASRGRDNQAQHF	73	0.000939453		CARSTTPNSDYTF	73	0.00102177		CTYSAGRNSPLYF	70	0.000884264		CANSQDGGEVF	37	0.000471102
CSASAETLYF	507	0.00687202		CASSLGQGDTGQLNF	203	0.00265437		CGGTGGARDTQYF	63	0.00089968		CTRSAVGQGAGNTLYF	49	0.00079031		CSGDNSQNTMYF	78	0.000963197		CTRSAEPVYEQYF	58	0.000895269		CASGAAGGNQDTPYF	73	0.000939453		CASSESGRGQNTLYF	73	0.00102177		CSADPRHNTLYF	70	0.000884264		CASSPGTEDYNNQAPLF	37	0.000471102
CASGDALTGTGNTLYF	505	0.00684491		CANMSQGRTLYCTCSAGLGEQNTLYF	202	0.0026413		CT_SAAQGNTEVF	63	0.00089968		CASSLGTTNSDSTF	49	0.00079031		CASSDERVGAETLYF	77	0.000950848		CASSPGRNTEVF	58	0.000895269		CSASGDYNQAQHF	73	0.000939453		CASGHTTNSDYTF	73	0.00102177		CASSQESRAQDTQYF	70	0.000884264		CASSSSGTTNTEVF	36	0.000458369
CTRSAGTTNTEVF	496	0.00672292		CASSPQSEVF	201	0.00262822		CSGDRIPNERLF	63	0.00089968		CASSRTGGHQDTQYF	49	0.00079031		CAGRQAYNSPLYF	77	0.000950848		CSRGTFNTEVLF	58	0.000895269		CPSSPGDWGEQYF	73	0.000939453		CSARTVYAEQF	73	0.00102177		CANMSQGRTLYCTCSADREQYF	70	0.000884264		CANSPGTGDYNNQAPLF	36	0.000458369
CASRTGTGGALVQYF	494	0.00669582		CASSHPGQGQDAQYF	201	0.00262822		CASSEGQRNAEVF	63	0.00089968		CASSDAQSTEVF	49	0.00079031		CASSQQVYNSPLYF	77	0.000950848		CSADRGASEQYF	58	0.000895269		CSADRANTG_LYF	73	0.000939453		CASSLRDRATGQLYF	73	0.00102177		CAGGGQNSYNSPLYF	69	0.000871631		CASSQAGVGGRRSAETLYF	36	0.000458369
CSAPGHFNSYSSPLYF	488	0.00661449		CGADRGRNSDYTF	201	0.00262822		CASSQENWGGTGQLYF	63	0.00089968		CASSPGSYEQYF	49	0.00079031		CASGDEGGANSDYTF	77	0.000950848		CASSRGTGYEQYF	58	0.000895269		CA_SRAGANSGNTLYF	72	0.000926584		CASSHTTSSDYTF	73	0.00102177		CVSGHYEQYF	69	0.000871631		CSADEGGYNSPLYF	36	0.000458369
CASNRDRGGNTLYF	488	0.00661449		CASSPTGGNYAEQF	201	0.00262822		CSGDRTSNERLF	63	0.00089968		CSAGQDWGGWQNTLYF	49	0.00079031		CSAEGLGGSQNTLHF	77	0.000950848		CASGDATGGPSAETLYF	58	0.000895269		CTYSADRANTGQLYF	72	0.000926584		CASSALQGWAEPLYF	73	0.00102177		CASRRTGANSDYTF	69	0.000871631		CASSGLGGAEQLF	36	0.000458369
CASSPSGQTSAEALYF	487	0.00660094		CGASGTGGYEQYF	200	0.00261515		CASSGQRGTEVF	63	0.00089968		CASSLGTTNSDHTF	49	0.00079031		CAGSGGGNYAEQF	77	0.000950848		CSTTGPNERLF	58	0.000895269		CSRGTKNTLYF	72	0.000926584		CASSQERSSNERLF	73	0.00102177		CASSTRGPQNTLYF	69	0.000871631		CASSFYTGSTLYF	36	0.000458369
CASSRGTDAEQF	479	0.0064925		CASSDASQGYEPYF	200	0.00261515		CASSRQISGNTLYF	63	0.00089968		CSAEDIHNSPLYF	49	0.00079031		CTRSAEGATEVF	77	0.000950848		CAWSLVGGSAETPYF	58	0.000895269		CSASGGYTQAQHF	72	0.000926584		CASSRRQGAEQF	73	0.00102177		CASSGTGTSQDTLYF	69	0.000871631		CASGHRASAEVF	36	0.000458369
CASSTGGDSDYTF	475	0.00643828		CVSSRDRSYEQYF	200	0.00261515		CSVGQGSTEVF	63	0.00089968		CSADQDWEGWQNTLYF	49	0.00079031		CADGDRAPAETLYF	77	0.000950848		CASSQDQGNSSLYF	58	0.000895269		CASRGLGRDNQAQHF	72	0.000926584		CSGDRKVF	72	0.00100777		CASSLEDANTEAF	69	0.000871631		CASRPGQEGTKVF	36	0.000458369
CASSRGASAETLYF	474	0.00642473		CASSRMGSGNTLYF	199	0.00260207		CTCSAGQTSAETLYF	63	0.00089968		CSGGQNTLYF	49	0.00079031		CSATGSNQAPLF	77	0.000950848		CSAGRDWGAWLAEQF	58	0.000895269		CASSPRDWGYERYF	72	0.000926584		CSANSYNSLLYF	72	0.00100777		CSAGDRGAETLCF	69	0.000871631		CASGDATEGYAEQF	36	0.000458369
CASSGQGQNSDYTF	474	0.00642473		CASSLGQGWAEQF	199	0.00260207		CASSQEVDKNTEVF	63	0.00089968		CSGSQNTLHF	49	0.00079031		CASSLKTNSNTEVCF	77	0.000950848		CVSSGSSQNTLYF	58	0.000895269		CASSSTNAEQF	72	0.000926584		CTSSANSYNSPLYF	72	0.00100777		CASSDGTANERLF	69	0.000871631		CASSQDGPANSDYTF	36	0.000458369
CASSDWDSQSTLYF	474	0.00642473		CASGQPGNQDTQYF	198	0.002589		CASSEGRRNTEVF	63	0.00089968		CASSIRADAEQF	49	0.00079031		CASSDAGGGSDYAF	77	0.000950848		CSEPGLGGNYAEQF	58	0.000895269		CSGTGRNTEVF	72	0.000926584		CAWSHWRNYAEQF	72	0.00100777		CASSQDTINAGQLYF	69	0.000871631		CVSSGTGVNSDYTF	36	0.000458369
CASSDAGGSS_EQYF	472	0.00639762		CSAGLGEQNTVYF	198	0.002589		CASSQVGGSYEQYF	63	0.00089968		CSAEQGQYF	49	0.00079031		CSAARNTEVF	77	0.000950848		CASGGQGRANERLF	57	0.000879833		CSVVSQNTLYF	72	0.000926584		CSADFGRNTGQLCF	72	0.00100777		CASNQDWGYEQYF	69	0.000871631		CASSPSGTANTEVF	36	0.000458369
CASSPDWASNTGQLYF	472	0.00639762		CAWRLQNTDVF	197	0.00257592		CTCSAEGGGPSAETLYF	62	0.000885399		CASSDGTTSAETPYF	48	0.000774181		CASRQINTEAF	77	0.000950848		CSAAGTNTEVF	57	0.000879833		CSAEYNSYNSPLYF	72	0.000926584		CNADQYNAETLYF	72	0.00100777		CSADTGGDSPLYF	69	0.000871631		CSGTGRRSAETLYF	36	0.000458369
CASSFTAETLYF	465	0.00630274		CASSPGRNSPLYF	196	0.00256284		CASGDESSQNTSYF	62	0.000885399		CSADQDWGGWQSTLYF	48	0.000774181		CSSGRNNQDTQYF	77	0.000950848		CSAVRDSQDTLYF	57	0.000879833		CASSQNLANTEVF	72	0.000926584		CSADFGRNTG_LYF	72	0.00100777		CASSLGWGGDTQYF	69	0.000871631		CASSLVGGALEQCF	36	0.000458369
CASGDEGGTDEQYF	464	0.00628919		CASSPGGNQDTQYF	196	0.00256284		CSTDPTDNSPLYF	62	0.000885399		CASSDPGQSYAEQF	48	0.000774181		CASSQGQTDSDYTF	77	0.000950848		CSARTANERLF	57	0.000879833		CASRQDWGAPNTGQLYF	72	0.000926584		CASGQESSAETLYF	72	0.00100777		CASSPQGVNSDYTF	68	0.000858999		CSARLGGPSAETLSF	36	0.000458369
CASGDAGGRGNSPLYF	461	0.00624852		CSAGLGEHNTLYF	195	0.00254977		CAGRQANTGQLYF	62	0.000885399		CTRSGSQNTLYF	48	0.000774181		CASSLDWGSTGQLYF	77	0.000950848		CSAGQGNERLSF	57	0.000879833		CSGETGGPGQLYF	71	0.000913715		CSALQGWAETLYF	72	0.00100777		CVSSLSWGVQNTLYF	68	0.000858999		CASGGPQGANTEVF	35	0.000445637
CASSPTGGGAETLYF	459	0.00622142		CASSDAS_GYEQYF	194	0.00253669		CSVRDWGDEQYF	62	0.000885399		CASSLSHFSDERLF	48	0.000774181		CASSDADRNSDYAF	77	0.000950848		CSGLGGPQNALYF	57	0.000879833		CASSQDPAGDHAEQF	71	0.000913715		CASGALGGRGE_YF	71	0.000993775		CSTDEQGADTEVF	68	0.000858999		CASSQDGGGRSYEQYF	35	0.000445637
CASSLQGEDSDYTF	457	0.00619431		CTRSARQGGYAEQF	194	0.00253669		CASSQDGAGQLYF	62	0.000885399		CASSSGGALAGQF	48	0.000774181		CSAGQLPNERLF	77	0.000950848		CASS_DRVSNERLF	57	0.000879833		CSSTGTGEGQNTLYF	71	0.000913715		CRGIPYEQYF	71	0.000993775		CASSLDRGADTGQLYF	68	0.000858999		CASSWDSYAE_F	35	0.000445637
CASSRAYYAEQF	455	0.0061672		CASSRGSSGNTLYF	194	0.00253669		CRAVSGGVYEQYF	62	0.000885399		CGAGQTGGAYEQYF	48	0.000774181		CASSDGGGANSDYTF	77	0.000950848		CSANDSPF	57	0.000879833		CSARYNSPLCF	71	0.000913715		CASSRARSQNTLYF	71	0.000993775		CANGADRVNYAEQF	68	0.000858999		CASSWDSYAKQF	35	0.000445637
CVSSLPGNYAEQF	452	0.00612654		CASSRDKNNSPLYF	194	0.00253669		CKQTGDQSTLYF	62	0.000885399		CASGDTRGHGTEVF	48	0.000774181		CASSQDGGVQDTQCF	77	0.000950848		CGADPKNTEVF	57	0.000879833		CSAVGGAGNSPLYF	71	0.000913715		CASSLEDGGAQGTQYF	71	0.000993775		CASGDGWGTNTGQLYF	68	0.000858999		CASSDVLNSDYTF	35	0.000445637
CASSLTGPSNTEVSF	451	0.00611298		CASSLGQSYEQYF	192	0.00251054		CASSQDRDRGAEALYF	62	0.000885399		CASSWAGGHQDTQYF	48	0.000774181		CASSDARRPSAETLYF	77	0.000950848		CGAGQGPNERLF	57	0.000879833		CSVEGANQDTQYF	71	0.000913715		CASSTTPTSDYTF	71	0.000993775		CASSSEGQRDTQYF	68	0.000858999		CAGSPGTGDYNNQAPPF	35	0.000445637
CDSSLTGPSNTEVF	448	0.00607232		CASSLNWGDTQYF	192	0.00251054		CAWSRGVNSPPYF	62	0.000885399		CASGDLDWGENALYF	48	0.000774181		CASSQTGGDTEAF	77	0.000950848		CAWSLGGRAETLYF	57	0.000879833		CASSRLAGGDTQYF	71	0.000913715		CASSLQGRDTEVSF	71	0.000993775		CAGSDDTANERLF	68	0.000858999		CASSPGTEVF	35	0.000445637
CSAVRAAEQF	445	0.00603166		CASGDGDSSGNTLYF	191	0.00249746		CTRSAGGGDTEVF	62	0.000885399		CSERDWGPQDTQYF	48	0.000774181		CSSSHNNQDTQYF	77	0.000950848		CASSPGGAGNTLYF	57	0.000879833		CSGETKNTLYF	71	0.000913715		CASSPGQNDSPLYF	71	0.000993775		CASSQGVGARAEQF	68	0.000858999		CSGPGRTSAETLYF	35	0.000445637
CSSSQSKNTLYF	443	0.00600455		CARSDASQGYEQYF	191	0.00249746		CASGDQLGGAETLYF	62	0.000885399		CASSTGAEQF	48	0.000774181		CSGQGARATEAF	77	0.000950848		CASSQDPGGDSDCTF	57	0.000879833		CASSLLGRDNQAQHF	71	0.000913715		CSAAGTEVAEQF	71	0.000993775		CSTEGQQAQHF	68	0.000858999		CASNDARDRDEQYF	35	0.000445637
CASSSWANTGQLYF	432	0.00585545		CASSRDWGSQNTLYF	190	0.00248439		CSADGLGGHAEQF	62	0.000885399		CASSLSTLSQDTQYF	48	0.000774181		CASSDWDNSCEQYF	77	0.000950848		CSADWGADTGRLYF	57	0.000879833		CSD_QGNTEVF	71	0.000913715		CRGDREVF	71	0.000993775		CASSDGGSYAEQF	68	0.000858999		CASSPGTGDYNSQAPLF	35	0.000445637
CASGERQSSYEQHF	422	0.00571991		CSPGQGWEQYF	190	0.00248439		CASSQDDGRDTQYF	62	0.000885399		CASSDAGDSTLYF	48	0.000774181		CSANQSGGGTQYF	77	0.000950848		CSADRDNCAEQF	57	0.000879833		CSADRATEIF	70	0.000900845		CASSDSGGGQNTLYF	71	0.000993775		CASSLRDRGTEVF	68	0.000858999		CSLTGVNQPPLF	35	0.000445637
CASSTGGQDTQYF	421	0.00570635		CASSQEGVGDTEVF	189	0.00247131		CAGSQDGTANSDYTF	62	0.000885399		CASSGTGGHQDTQYF	48	0.000774181		CSLRGWDTQHF	76	0.0009385		CGADRDNYAEQF	57	0.000879833		CASGQDLSQNTLYF	70	0.000900845		CRLGGEMLYF	71	0.000993775		CVSSLGDREVF	68	0.000858999		CASSQDIGGYAEQF	35	0.000445637
CASSDRGGQGTQYF	420	0.0056928		CASSLSRGLAEQF	188	0.00245824		CSAGTSSTGQLYF	62	0.000885399		CSAGGGNTEVLF	48	0.000774181		CASSETSTEVF	76	0.0009385		CTSRIRGLSNERLF	57	0.000879833		CASSQEGRGEQYF	70	0.000900845		CASSEGQANTEQLYF	71	0.000993775		CASSQGRVDYAEQF	68	0.000858999		CASPSQGSDTEVF	35	0.000445637
CGARRQGGEQYF	413	0.00559792		CASSLEHQDTQYF	188	0.00245824		CSADLGDQDAQYF	62	0.000885399		CASSLGTTNSDYPF	48	0.000774181		CSADNGGQNTLYF	76	0.0009385		CTSRTANSDYTF	57	0.000879833		CASSQDRGSSYEQHF	70	0.000900845		CSVDQGHTGQLYF	71	0.000993775		CASDDARNTGQLYF	68	0.000858999		CVSRDREVF	35	0.000445637
CASSQGLTGASAETLYF	411	0.00557081		CAWCSRDRSYSDYTF	187	0.00244516		CASSDAKGGSQNALYF	62	0.000885399		CSADRAGGAEMLYF	47	0.000758052		CRGPDHTF	76	0.0009385		CTCSAGQNNSPLYF	57	0.000879833		CASSQGGDQDTLYF	70	0.000900845		CTYSGGQTNTEVF	71	0.000993775		CASGDGGNYAEQF	68	0.000858999		CSLTGVNKAPLF	35	0.000445637
CASSRGTGAQQF	406	0.00550304		CASSLGQGGVF	187	0.00244516		CSVQGSCSDHTF	62	0.000885399		CSADRGGITEAF	47	0.000758052		CSAGTRVNQAPLF	76	0.0009385		CSADRDWGAWLAERF	57	0.000879833		CASSQTANTEAF	70	0.000900845		CSADQGVETLYF	70	0.000979778		CRGAGENTLYF	67	0.000846367		CASGDATGGYAKQF	35	0.000445637
CTYSASGQENTEVF	405	0.00548948		CASSLETGGIYEQYF	186	0.00243209		CSVGQGNTEVLF	61	0.000871118		CASSRDGGGQDTQYF	47	0.000758052		CASSQGPGGRGAEQF	76	0.0009385		CSAGTGDNQTPLF	57	0.000879833		CSAGRDNSYNSPLYF	70	0.000900845		CASSQLGDNNQDTQYF	70	0.000979778		CASGNARNTGQLYF	67	0.000846367		CSAGVNTLSF	35	0.000445637
CGATRGRNSPLYF	401	0.00543527		CGADPDTSSYEQYF	186	0.00243209		CAWSLDTEVF	61	0.000871118		CASSWTASAGTLYF	47	0.000758052		CSFPGTGSYEQYF	76	0.0009385		CTSGGTGSNSDYTF	57	0.000879833		CSNRDWGGETLYF	70	0.000900845		CNAEWGQAPLF	70	0.000979778		CSAGRDSPLYF	67	0.000846367		CASSQQDTPYF	35	0.000445637
CTYSAPGHFNSYNSPLYF	400	0.00542171		CASSLDRGGEQYF	184	0.00240593		CSGAGGARDTQYF	61	0.000871118		CAGHQDTLYF	47	0.000758052		CVSGGGQGNYAEQF	76	0.0009385		CSAGGLYGQYF	57	0.000879833		CSADRQRRNSPLYF	70	0.000900845		CSADPAATTEVF	70	0.000979778		CASSEPGRSNERLF	67	0.000846367		CASSPGTGDYNKQAPLF	35	0.000445637
CASSTGYEQYF	396	0.0053675		CSAGLGASQNTLYF	183	0.00239286		CSAGASNTGQLYF	61	0.000871118		CAGSREGNERLF	47	0.000758052		CSAGGSQNTLYF	76	0.0009385		CSAGPVYEQYF	56	0.000864397		CNASGTGAEQF	70	0.000900845		CASSLRDKEDEQYF	70	0.000979778		CASSPQGATSDYTF	67	0.000846367		CSASRGQNSLYF	35	0.000445637
CASSRDSQGRNSPLYF	387	0.00524551		CGARGPGQLYF	183	0.00239286		CSARTSNTGQLYF	61	0.000871118		CASSFRDWGHAEQF	47	0.000758052		CASSLGTGGYEQYF	76	0.0009385		CSAVRDSRNTLYF	56	0.000864397		CSSIGTGGGQNTLYF	70	0.000900845		CASSQSEDNNQDTQYF	70	0.000979778		CASSGTGGALERYF	67	0.000846367		CASNRTINQDTQYF	35	0.000445637
CSALGHFNSYNSPLYF	386	0.00523195		CASSLGPNSPLYF	182	0.00237978		CASGDARGARSAETLYF	61	0.000871118		CASSSGPSTEVF	47	0.000758052		CSTEGQDTQYF	76	0.0009385		CSPGTGGARYAEQF	56	0.000864397		CGARGGSSETLYF	70	0.000900845		CASGQARGAEQF	70	0.000979778		CSADSSGNALYF	67	0.000846367		CASSGISYEQYF	35	0.000445637
CASSRQGEAPLF	381	0.00516418		CGASDWGRVHTLYF	181	0.00236671		CSADPTKTSQNALYF	61	0.000871118		CASRSTGGYSYAEQF	47	0.000758052		CAGSQTGGDTEVF	76	0.0009385		CRWDINSDYTF	56	0.000864397		CAGSHSNYAEQF	70	0.000900845		CANMSQGRTLYCTCSADASSYEQYF	70	0.000979778		CVSSQGGLQDTQYF	67	0.000846367		CSGTGRSSAGTLYF	35	0.000445637
CSSSPHSSQNTLYF	381	0.00516418		CASSRDRGGERLF	180	0.00235363		CSADGAIEQYF	61	0.000871118		CRLRDRGDSDCTF	47	0.000758052		CTCSADEGNYAEQF	76	0.0009385		CANMSQGRTLYCTCSALGVQDTQYF	56	0.000864397		CSAETLNQDTQYF	70	0.000900845		CASGDAAFSNERLF	70	0.000979778		CSAV_GDEQYF	67	0.000846367		CASSHQGAYNSPLYF	35	0.000445637
CSVPGHFNSYNSPLYF	377	0.00510996		CSAGDAEVF	180	0.00235363		CIADRGGYEQYF	61	0.000871118		CASSGYRTNTEVF	47	0.000758052		CASSPTGGSYERYF	76	0.0009385		CSGDSPYAEQLF	56	0.000864397		CSGTGGNTEIF	70	0.000900845		CSADPTANTEVF	70	0.000979778		CRGTGEDTLYF	67	0.000846367		CTSSQGGGEVF	34	0.000432904
CSASGHFNSYNSPLYF	375	0.00508286		CAGSLGGEQYF	179	0.00234056		CSADWGSYGQYF	61	0.000871118		CASSQEGSREGLF	47	0.000758052		CAGSLQGAGNTLYF	76	0.0009385		CSAGTSTGQLYF	56	0.000864397		CSADRAIEVF	70	0.000900845		CASSLQGRGTEVF	70	0.000979778		CASGDGRGANTGQLYF	67	0.000846367		CASSQQGADNSPLYF	34	0.000432904
CASSRGGGYAEQF	372	0.00504219		CASSPDRGHYAEQF	179	0.00234056		CSAGRDNERLF	61	0.000871118		CAWTWGVNYAEQSF	47	0.000758052		CTYSAGHNNYAEQF	76	0.0009385		CRQGTYEQHF	56	0.000864397		CANMSQGRTLYCTCSASGTGAEQF	70	0.000900845		CASSPGPNNSPLYF	70	0.000979778		CAGSQGPVANTEVF	67	0.000846367		CASSQEGVGGRRSAETRYF	34	0.000432904
CASSSGGANTGQLYF	364	0.00493376		CSAGLGEQNTMYF	179	0.00234056		CAGGDAGGARSAETLYF	61	0.000871118		CTRSAPGTDGTEVF	47	0.000758052		CASSLDWANTEVF	75	0.000926151		CSAGANTGQLYF	56	0.000864397		CASSPGDWGQQYF	69	0.000887976		CASS_DRVYEQYF	70	0.000979778		CSVDWGAYEQYF	67	0.000846367		CASGGPQGSNIEVF	34	0.000432904
CASSDGQGARDTEVF	362	0.00490665		CASSLVRSSYEQYF	179	0.00234056		CSAEGGRAEQF	61	0.000871118		CASSLRYAEQF	47	0.000758052		CANSDWDNSYEQYF	75	0.000926151		CASSSRSYNNQAPLF	56	0.000864397		CASCPDSSYEQYF	69	0.000887976		CARSESGGGQNTLYF	70	0.000979778		CTYSADTGGNSPLYF	67	0.000846367		CTSSQGGGRSYEPYF	34	0.000432904
CASSRRASGNTLYF	359	0.00486599		CASGRDRSYEQYF	178	0.00232748		CASGDGAGGAEQF	61	0.000871118		CPSSLDKSYEQYF	47	0.000758052		CASSDAAENSDYAF	75	0.000926151		CASSRGTSNTEVF	56	0.000864397		CSPYREEEVF	69	0.000887976		CASSQARRAEQF	70	0.000979778		CASSPGGQSTLYF	66	0.000833734		CAGVNTLYF	34	0.000432904
CASSRDGGAEEQYF	358	0.00485243		CSAGSGRLYF	177	0.0023144		CSAGWGDTGQLYF	61	0.000871118		CTGSADHGGTEVF	47	0.000758052		CSVGGQGYEQYF	75	0.000926151		CATNTEVF	56	0.000864397		CAWRQTFNNQAQHF	69	0.000887976		CSADNYEPYF	70	0.000979778		CGAEGANSDYTF	66	0.000833734		CSGTGRSSVETLYF	34	0.000432904
CASRDNANSDYTF	356	0.00482532		CASSLGDSQAPLF	177	0.0023144		CSADWGRDEK_SF	61	0.000871118		CASSLGPGGYQDTQYF	47	0.000758052		CSAPGGCEQYF	75	0.000926151		CSADAQPNSGYTF	56	0.000864397		CASRGSSYEQHF	69	0.000887976		CASSQDVDWAYAEQF	70	0.000979778		CASSQGGGLSYEQYF	66	0.000833734		CASRQQGSDTEVF	34	0.000432904
CSADEGALSGNTPYF	354	0.00479822		CASSQGPGVQDTQYF	176	0.00230133		CSPGGARTGQPYF	61	0.000871118		CARSLGQGAGAETLYF	46	0.000741923		CASSPHWGGRAETLYF	75	0.000926151		CSAGQNDSPLYF	56	0.000864397		CTYSGTGGNTEVF	69	0.000887976		CAWSLGTGRDVQYF	70	0.000979778		CASGPDRVEQYF	66	0.000833734		CASSPGTRDYNNQAPLF	34	0.000432904
CASGDGGRGYAEQLF	353	0.00478466		CASSGDRGAAPLF	176	0.00230133		CSADRIGSNEGLF	61	0.000871118		CASSLVGYEQHF	46	0.000741923		CTSTPGGGTGQLYF	75	0.000926151		CAWSLRAEVF	56	0.000864397		CASSSPGRDNQAQHF	69	0.000887976		CSADQGAPLF	69	0.000965781		CASSQDTINTGQLHF	66	0.000833734		CASSHIGGYEQYF	34	0.000432904
[truncated: 81,072 more rows]
