# Supplementary material for: Gut Microbiome Contributes to Liver Fibrosis Impact on T Cell Receptor Immune Repertoire
Source: Front Microbiol. 2020 Nov 27;11:571847. doi: 10.3389/fmicb.2020.571847 (PMC7729130; doi:10.3389/fmicb.2020.571847)
Supplement: Supplementary file 9 [file Table_9.XLSX]

## Sheet: all.otus.profiling
OTU	Total_tags	UnFMT-1_tags	UnFMT-2_tags	UnFMT-3_tags	UnFMT-4_tags	FMT-1_tags	FMT-2_tags	FMT-3_tags	FMT-4_tags	UnFMT-1_relative_abundance	UnFMT-2_relative_abundance	UnFMT-3_relative_abundance	UnFMT-4_relative_abundance	FMT-1_relative_abundance	FMT-2_relative_abundance	FMT-3_relative_abundance	FMT-4_relative_abundance	Domain	Phylum	Class	Order	Family	Genus	Species
Otu000003	74868	29872	11	11698	22995	2267	742	6780	503	53.5379	0.015691	20.6471	37.3939	3.49743	1.46337	12.4529	0.953735	Bacteria	Firmicutes	Bacilli	Lactobacillales	Lactobacillaceae	Lactobacillus	Lactobacillus_gasseri
Otu000004	66387	15640	181	22205	13664	327	12787	194	1389	28.0307	0.258195	39.192	22.2201	0.504482	25.2184	0.356323	2.63368	Bacteria	Firmicutes	Bacilli	Lactobacillales	Lactobacillaceae	Lactobacillus	Lactobacillus_murinus
Otu000001	56773	133	49853	1512	3318	523	27	598	809	0.238368	71.1149	2.66869	5.39565	0.806862	0.053249	1.09836	1.53394	Bacteria	Verrucomicrobia	Verrucomicrobiae	Verrucomicrobiales	Akkermansiaceae	Akkermansia
Otu000006	29796	9	27	7	207	5863	133	2181	21369	0.01613	0.038515	0.012355	0.336618	9.04519	0.262302	4.00588	40.5176	Bacteria	Bacteroidetes	Bacteroidia	Bacteroidales	Prevotellaceae	Alloprevotella
Otu000016	27559	1	2	0	17	11268	10297	5341	633	0.001792	0.002853	0	0.027645	17.3838	20.3077	9.8099	1.20023	Bacteria	Firmicutes	Clostridia	Clostridiales	Lachnospiraceae
Otu000029	11894	4	18	11	14	7136	756	3681	274	0.007169	0.025677	0.019415	0.022766	11.0091	1.49098	6.76095	0.51953	Bacteria	Firmicutes	Clostridia	Clostridiales	Lachnospiraceae
Otu000013	10251	24	1610	61	198	1438	78	1842	5000	0.043014	2.29665	0.107665	0.321983	2.21848	0.153831	3.38323	9.48047	Bacteria	Bacteroidetes	Bacteroidia	Bacteroidales	Muribaculaceae
Otu000028	10187	5	605	23	110	3176	145	4570	1553	0.008961	0.863028	0.040595	0.178879	4.8998	0.285968	8.39379	2.94463	Bacteria	Bacteroidetes	Bacteroidia	Bacteroidales	Muribaculaceae
Otu000010	9690	6	31	41	183	3030	859	3197	2343	0.010753	0.044221	0.072365	0.29759	4.67455	1.69411	5.87198	4.44255	Bacteria	Bacteroidetes	Bacteroidia	Bacteroidales	Muribaculaceae
Otu000036	9166	2127	7	3652	3242	8	38	30	62	3.8121	0.009985	6.44581	5.27206	0.012342	0.074943	0.055101	0.117558	Bacteria	Firmicutes	Bacilli	Lactobacillales	Streptococcaceae	Streptococcus	Streptococcus_danieliae
Otu000035	8950	1208	0	4532	3165	12	11	7	15	2.16503	0	7.99901	5.14684	0.018513	0.021694	0.012857	0.028441	Bacteria	Cyanobacteria	Oxyphotobacteria	Chloroplast
Otu000031	8248	5	7	0	54	2201	93	3499	2389	0.008961	0.009985	0	0.087813	3.39561	0.183414	6.42667	4.52977	Bacteria	Bacteroidetes	Bacteroidia	Bacteroidales	Muribaculaceae
Otu000038	6807	4	55	33	5	210	5586	61	853	0.007169	0.078457	0.058245	0.008131	0.323979	11.0167	0.11204	1.61737	Bacteria	Epsilonbacteraeota	Campylobacteria	Campylobacterales	Helicobacteraceae	Helicobacter	Helicobacter_mastomyrinus
Otu000015	6747	11	40	7	146	2454	130	3562	397	0.019715	0.05706	0.012355	0.237422	3.78593	0.256385	6.54238	0.752749	Bacteria	Bacteroidetes	Bacteroidia	Bacteroidales	Muribaculaceae
Otu000037	5390	0	394	34	29	1708	264	1596	1365	0	0.562038	0.06001	0.047159	2.63503	0.520659	2.9314	2.58817	Bacteria	Bacteroidetes	Bacteroidia	Bacteroidales	Muribaculaceae
Otu000054	5038	1	240	0	21	301	3516	65	894	0.001792	0.342358	0	0.03415	0.46437	6.93423	0.119387	1.69511	Bacteria	Bacteroidetes	Bacteroidia	Bacteroidales	Rikenellaceae	Alistipes
Otu000043	4976	3	3117	43	76	489	32	351	865	0.005377	4.44638	0.075895	0.123589	0.754408	0.06311	0.644687	1.64012	Bacteria	Bacteroidetes	Bacteroidia	Bacteroidales	Tannerellaceae	Parabacteroides
Otu000034	4071	1829	1	608	91	405	523	439	175	3.27801	0.001426	1.07312	0.147982	0.624817	1.03146	0.806318	0.331816	Bacteria	Firmicutes	Bacilli	Lactobacillales	Lactobacillaceae	Lactobacillus	Lactobacillus_reuteri
Otu000019	4060	0	2583	4	178	48	40	17	1190	0	3.68463	0.00706	0.289459	0.074052	0.078888	0.031224	2.25635	Bacteria	Bacteroidetes	Bacteroidia	Bacteroidales	Bacteroidaceae	Bacteroides	Bacteroides_acidifaciens
Otu000007	3739	6	74	37	397	665	181	921	1458	0.010753	0.10556	0.065305	0.645591	1.02593	0.356967	1.69162	2.76451	Bacteria	Bacteroidetes	Bacteroidia	Bacteroidales	Muribaculaceae
Otu000011	2452	29	2078	26	102	96	6	76	39	0.051975	2.96425	0.04589	0.16587	0.148105	0.011833	0.13959	0.073948	Bacteria	Bacteroidetes	Bacteroidia	Bacteroidales	Muribaculaceae
Otu000002	2372	104	209	63	1425	158	53	24	336	0.186393	0.298137	0.111195	2.3173	0.243756	0.104526	0.044081	0.637088	Bacteria	Bacteroidetes	Bacteroidia	Bacteroidales	Muribaculaceae
Otu000076	2347	1	73	6	13	725	40	1178	311	0.001792	0.104134	0.01059	0.02114	1.1185	0.078888	2.16365	0.589685	Bacteria	Bacteroidetes	Bacteroidia	Bacteroidales	Muribaculaceae
Otu000071	2106	322	7	1353	417	3	2	2	0	0.577102	0.009985	2.38805	0.678115	0.004628	0.003944	0.003673	0	Bacteria	Proteobacteria	Gammaproteobacteria	Enterobacteriales	Enterobacteriaceae
Otu000098	2087	0	35	1	4	541	1183	33	290	0	0.049927	0.001765	0.006505	0.834632	2.3331	0.060612	0.549867	Bacteria	Deferribacteres	Deferribacteres	Deferribacterales	Deferribacteraceae	Mucispirillum	Mucispirillum_schaedleri_ASF457
Otu000027	2085	34	18	22	58	555	73	1026	299	0.060936	0.025677	0.03883	0.094318	0.85623	0.14397	1.88447	0.566932	Bacteria	Bacteroidetes	Bacteroidia	Bacteroidales	Muribaculaceae
Otu000111	1989	4	1499	2	22	0	455	4	3	0.007169	2.13831	0.00353	0.035776	0	0.897347	0.007347	0.005688	Bacteria	Firmicutes	Clostridia	Clostridiales	Lachnospiraceae
Otu000062	1857	1	3	1	2	1039	23	742	46	0.001792	0.004279	0.001765	0.003252	1.60292	0.04536	1.36284	0.08722	Bacteria	Firmicutes	Clostridia	Clostridiales	Lachnospiraceae	Lachnospiraceae_NK4A136_group	Lachnospiraceae_bacterium_DW17
Otu000053	1605	8	46	7	26	556	286	463	213	0.014338	0.065619	0.012355	0.042281	0.857773	0.564047	0.850399	0.403868	Bacteria	Proteobacteria	Gammaproteobacteria	Betaproteobacteriales	Burkholderiaceae	Parasutterella
Otu000014	1525	163	7	275	946	62	2	43	27	0.292136	0.009985	0.485377	1.53836	0.095651	0.003944	0.078979	0.051195	Bacteria	Firmicutes	Erysipelotrichia	Erysipelotrichales	Erysipelotrichaceae	Dubosiella
Otu000115	1518	1	0	2	1	109	940	54	411	0.001792	0	0.00353	0.001626	0.168161	1.85386	0.099183	0.779295	Bacteria	Firmicutes	Erysipelotrichia	Erysipelotrichales	Erysipelotrichaceae	Erysipelatoclostridium
Otu000058	1498	3	3	11	18	520	564	257	122	0.005377	0.004279	0.019415	0.029271	0.802234	1.11232	0.472036	0.231323	Bacteria	Bacteroidetes	Bacteroidia	Bacteroidales	Tannerellaceae	Parabacteroides
Otu000045	1429	48	120	46	117	262	617	203	16	0.086028	0.171179	0.08119	0.190262	0.404202	1.21684	0.372853	0.030338	Bacteria	Firmicutes	Clostridia	Clostridiales	Lachnospiraceae	Lachnoclostridium
Otu000093	1358	2	6	0	1	740	244	314	51	0.003584	0.008559	0	0.001626	1.14164	0.481215	0.576729	0.096701	Bacteria	Firmicutes	Clostridia	Clostridiales	Lachnospiraceae
Otu000096	1318	0	12	1	1	489	510	230	75	0	0.017118	0.001765	0.001626	0.754408	1.00582	0.422445	0.142207	Bacteria	Firmicutes	Clostridia	Clostridiales	Ruminococcaceae	Anaerotruncus
Otu000074	1300	13	1	434	26	144	276	224	182	0.023299	0.001426	0.766013	0.042281	0.222157	0.544325	0.411424	0.345089	Bacteria	Firmicutes	Clostridia	Clostridiales	Clostridiaceae_1	Candidatus_Arthromitus
Otu000018	1291	24	210	26	256	248	40	392	95	0.043014	0.299563	0.04589	0.416301	0.382604	0.078888	0.719993	0.180129	Bacteria	Bacteroidetes	Bacteroidia	Bacteroidales	Muribaculaceae
Otu000070	1267	1	8	3	49	277	666	219	44	0.001792	0.011412	0.005295	0.079683	0.427344	1.31348	0.402241	0.083428	Bacteria	Firmicutes	Clostridia	Clostridiales	Lachnospiraceae
Otu000081	1261	2	47	3	2	520	506	174	7	0.003584	0.067045	0.005295	0.003252	0.802234	0.997929	0.319589	0.013273	Bacteria	Firmicutes	Clostridia	Clostridiales	Lachnospiraceae	ASF356
Otu000067	1235	0	35	0	5	664	51	478	2	0	0.049927	0	0.008131	1.02439	0.100582	0.87795	0.003792	Bacteria	Firmicutes	Clostridia	Clostridiales	Lachnospiraceae
Otu000012	1225	25	32	21	37	606	156	261	87	0.044806	0.045648	0.037065	0.060168	0.934911	0.307662	0.479383	0.16496	Bacteria	Firmicutes	Clostridia	Clostridiales	Lachnospiraceae	Lachnospiraceae_NK4A136_group
Otu000152	1210	0	177	0	2	22	693	12	304	0	0.252489	0	0.003252	0.033941	1.36673	0.022041	0.576413	Bacteria	Firmicutes	Clostridia	Clostridiales	Ruminococcaceae	Flavonifractor
Otu000005	1200	79	85	35	589	138	74	57	143	0.141587	0.121252	0.061775	0.957817	0.212901	0.145942	0.104693	0.271141	Bacteria	Bacteroidetes	Bacteroidia	Bacteroidales	Muribaculaceae
Otu000065	1103	1	0	6	38	556	9	451	42	0.001792	0	0.01059	0.061795	0.857773	0.01775	0.828359	0.079636	Bacteria	Proteobacteria	Deltaproteobacteria	Desulfovibrionales	Desulfovibrionaceae	Desulfovibrio
Otu000061	1073	0	26	3	37	354	12	455	186	0	0.037089	0.005295	0.060168	0.546136	0.023666	0.835706	0.352673	Bacteria	Bacteroidetes	Bacteroidia	Bacteroidales	Muribaculaceae
Otu000086	1070	0	0	179	7	435	17	298	134	0	0	0.315936	0.011383	0.6711	0.033527	0.547341	0.254077	Bacteria	Actinobacteria	Coriobacteriia	Coriobacteriales	Eggerthellaceae
Otu000032	990	0	645	17	28	98	17	152	33	0	0.920088	0.030005	0.045533	0.15119	0.033527	0.279181	0.062571	Bacteria	Bacteroidetes	Bacteroidia	Bacteroidales	Muribaculaceae
Otu000158	948	14	1	742	190	0	0	0	1	0.025091	0.001426	1.30964	0.308973	0	0	0	0.001896	Bacteria	Proteobacteria	Gammaproteobacteria	Oceanospirillales	Halomonadaceae	Salinicola
Otu000033	946	10	279	2	58	177	17	254	149	0.017922	0.397991	0.00353	0.094318	0.273068	0.033527	0.466526	0.282518	Bacteria	Bacteroidetes	Bacteroidia	Bacteroidales	Muribaculaceae
Otu000039	945	59	3	52	787	4	3	27	10	0.105742	0.004279	0.09178	1.2798	0.006171	0.005917	0.049591	0.018961	Bacteria	Actinobacteria	Actinobacteria	Bifidobacteriales	Bifidobacteriaceae	Bifidobacterium
Otu000082	934	16	2	4	9	538	30	296	39	0.028676	0.002853	0.00706	0.014636	0.830004	0.059166	0.543668	0.073948	Bacteria	Firmicutes	Clostridia	Clostridiales	Lachnospiraceae	Lachnospiraceae_UCG-006
Otu000130	923	5	905	0	9	1	0	1	2	0.008961	1.29098	0	0.014636	0.001543	0	0.001837	0.003792	Bacteria	Cyanobacteria	Melainabacteria	Gastranaerophilales
Otu000113	853	0	0	0	0	337	9	451	56	0	0	0	0	0.519909	0.01775	0.828359	0.106181	Bacteria	Firmicutes	Clostridia	Clostridiales	Lachnospiraceae
Otu000146	836	6	23	0	13	299	290	154	51	0.010753	0.032809	0	0.02114	0.461284	0.571936	0.282854	0.096701	Bacteria	Firmicutes	Clostridia	Clostridiales	Ruminococcaceae	Negativibacillus
Otu000123	833	0	0	0	9	466	11	301	46	0	0	0	0.014636	0.718925	0.021694	0.552852	0.08722	Bacteria	Firmicutes	Clostridia	Clostridiales	Lachnospiraceae	Blautia
Otu000024	827	26	7	54	672	6	1	20	41	0.046598	0.009985	0.09531	1.09279	0.009257	0.001972	0.036734	0.07774	Bacteria	Actinobacteria	Coriobacteriia	Coriobacteriales	Atopobiaceae	Coriobacteriaceae_UCG-002
Otu000188	812	2	49	0	0	275	410	51	25	0.003584	0.069898	0	0	0.424258	0.808599	0.093673	0.047402	Bacteria	Firmicutes	Clostridia	Clostridiales	Ruminococcaceae
Otu000055	799	0	77	3	24	77	548	37	33	0	0.10984	0.005295	0.039028	0.118792	1.08076	0.067958	0.062571	Bacteria	Firmicutes	Clostridia	Clostridiales	Ruminococcaceae	Intestinimonas
Otu000077	722	0	0	0	0	290	13	343	76	0	0	0	0	0.4474	0.025638	0.629994	0.144103	Bacteria	Firmicutes	Clostridia	Clostridiales	Lachnospiraceae	A2
Otu000155	716	1	1	0	0	300	93	198	123	0.001792	0.001426	0	0	0.462827	0.183414	0.36367	0.23322	Bacteria	Firmicutes	Clostridia	Clostridiales	Lachnospiraceae
Otu000095	649	0	0	1	0	109	311	62	166	0	0	0.001765	0	0.168161	0.613352	0.113876	0.314752	Bacteria	Firmicutes	Erysipelotrichia	Erysipelotrichales	Erysipelotrichaceae
Otu000169	636	0	0	0	0	296	78	179	83	0	0	0	0	0.456656	0.153831	0.328772	0.157376	Bacteria	Firmicutes	Clostridia	Clostridiales	Lachnospiraceae	Lachnospiraceae_NK4A136_group
Otu000112	580	32	3	270	264	2	5	2	2	0.057352	0.004279	0.476552	0.42931	0.003086	0.009861	0.003673	0.003792	Bacteria	Proteobacteria	Alphaproteobacteria	Rickettsiales	Mitochondria
Otu000079	547	3	33	2	5	218	125	111	50	0.005377	0.047074	0.00353	0.008131	0.336321	0.246524	0.203875	0.094805	Bacteria	Firmicutes	Clostridia	Clostridiales	Ruminococcaceae	Ruminiclostridium
Otu000122	530	0	228	1	0	130	79	71	21	0	0.32524	0.001765	0	0.200558	0.155803	0.130407	0.039818	Bacteria	Firmicutes	Clostridia	Clostridiales	Ruminococcaceae	Intestinimonas
Otu000244	525	0	494	19	12	0	0	0	0	0	0.704687	0.033535	0.019514	0	0	0	0	Bacteria	Firmicutes	Clostridia	Clostridiales	Lachnospiraceae
Otu000057	516	6	3	4	29	266	4	102	102	0.010753	0.004279	0.00706	0.047159	0.410374	0.007889	0.187345	0.193402	Bacteria	Firmicutes	Clostridia	Clostridiales	Ruminococcaceae	Ruminiclostridium
Otu000049	511	6	2	25	103	192	3	100	80	0.010753	0.002853	0.044125	0.167496	0.296209	0.005917	0.183672	0.151688	Bacteria	Bacteroidetes	Bacteroidia	Bacteroidales	Muribaculaceae
Otu000131	505	0	495	1	0	4	0	2	3	0	0.706114	0.001765	0	0.006171	0	0.003673	0.005688	Bacteria	Bacteroidetes	Bacteroidia	Bacteroidales	Rikenellaceae	Alistipes
Otu000232	493	0	0	491	0	0	0	2	0	0	0	0.866618	0	0	0	0.003673	0	Bacteria	Planctomycetes	Planctomycetacia	Gemmatales	Gemmataceae
Otu000197	488	33	0	390	59	2	2	2	0	0.059144	0	0.688353	0.095944	0.003086	0.003944	0.003673	0	Bacteria	Firmicutes	Bacilli	Lactobacillales	Lactobacillaceae	Lactobacillus
Otu000017	482	24	94	52	32	78	58	103	41	0.043014	0.13409	0.09178	0.052038	0.120335	0.114387	0.189182	0.07774	Bacteria	Bacteroidetes	Bacteroidia	Bacteroidales	Muribaculaceae
Otu000135	479	15	0	129	4	91	105	106	29	0.026884	0	0.227686	0.006505	0.140391	0.20708	0.194692	0.054987	Bacteria	Firmicutes	Bacilli	Lactobacillales	Lactobacillaceae	Lactobacillus
Otu000056	478	2	0	25	28	41	11	32	339	0.003584	0	0.044125	0.045533	0.063253	0.021694	0.058775	0.642776	Bacteria	Firmicutes	Clostridia	Clostridiales	Ruminococcaceae	Ruminococcaceae_UCG-014
Otu000099	478	3	117	1	2	193	82	63	17	0.005377	0.1669	0.001765	0.003252	0.297752	0.16172	0.115713	0.032234	Bacteria	Firmicutes	Clostridia	Clostridiales	Ruminococcaceae	Oscillibacter
Otu000172	474	0	0	0	0	311	1	157	5	0	0	0	0	0.479798	0.001972	0.288364	0.00948	Bacteria	Firmicutes	Clostridia	Clostridiales	Ruminococcaceae	Ruminococcaceae_UCG-004
Otu000089	472	1	20	2	0	194	5	191	59	0.001792	0.02853	0.00353	0	0.299295	0.009861	0.350813	0.11187	Bacteria	Firmicutes	Clostridia	Clostridiales	Ruminococcaceae	Butyricicoccus
Otu000026	470	14	45	8	106	97	18	119	63	0.025091	0.064192	0.01412	0.172375	0.149647	0.035499	0.218569	0.119454	Bacteria	Bacteroidetes	Bacteroidia	Bacteroidales	Muribaculaceae
Otu000088	470	3	0	164	9	2	290	2	0	0.005377	0	0.289461	0.014636	0.003086	0.571936	0.003673	0	Bacteria	Firmicutes	Clostridia	Clostridiales	Lachnospiraceae
Otu000080	460	2	70	4	0	112	185	58	29	0.003584	0.099854	0.00706	0	0.172789	0.364856	0.10653	0.054987	Bacteria	Firmicutes	Clostridia	Clostridiales	Ruminococcaceae
Otu000108	447	0	0	0	0	298	3	84	62	0	0	0	0	0.459742	0.005917	0.154284	0.117558	Bacteria	Bacteroidetes	Bacteroidia	Bacteroidales	Prevotellaceae	Prevotellaceae_UCG-001
Otu000023	419	19	145	3	168	20	18	8	38	0.034053	0.206841	0.005295	0.273197	0.030855	0.035499	0.014694	0.072052	Bacteria	Bacteroidetes	Bacteroidia	Bacteroidales	Muribaculaceae
Otu000042	413	1	1	12	10	139	4	199	47	0.001792	0.001426	0.02118	0.016262	0.214443	0.007889	0.365506	0.089116	Bacteria	Bacteroidetes	Bacteroidia	Bacteroidales	Muribaculaceae
Otu000118	396	4	2	4	12	6	353	3	12	0.007169	0.002853	0.00706	0.019514	0.009257	0.696184	0.00551	0.022753	Bacteria	Firmicutes	Erysipelotrichia	Erysipelotrichales	Erysipelotrichaceae	Erysipelatoclostridium
Otu000148	385	0	0	0	1	157	37	103	87	0	0	0	0.001626	0.242213	0.072971	0.189182	0.16496	Bacteria	Firmicutes	Clostridia	Clostridiales	Lachnospiraceae	Lachnospiraceae_NK4A136_group	Lachnospiraceae_bacterium_A4
Otu000241	381	0	14	0	0	147	139	37	44	0	0.019971	0	0	0.226785	0.274135	0.067958	0.083428	Bacteria	Firmicutes	Clostridia	Clostridiales	Ruminococcaceae	GCA-900066225
Otu000021	372	10	17	39	200	31	31	7	37	0.017922	0.02425	0.068835	0.325235	0.047825	0.061138	0.012857	0.070155	Bacteria	Bacteroidetes	Bacteroidia	Bacteroidales	Muribaculaceae
Otu000120	365	1	4	1	0	198	108	28	25	0.001792	0.005706	0.001765	0	0.305466	0.212997	0.051428	0.047402	Bacteria	Firmicutes	Clostridia	Clostridiales	Lachnospiraceae	Roseburia
Otu000243	364	29	1	234	95	0	3	0	2	0.051975	0.001426	0.413012	0.154487	0	0.005917	0	0.003792	Bacteria	Firmicutes	Bacilli	Lactobacillales	Enterococcaceae	Enterococcus	Enterococcus_faecalis
Otu000110	346	0	0	0	12	154	8	156	16	0	0	0	0.019514	0.237585	0.015778	0.286528	0.030338	Bacteria	Firmicutes	Clostridia	Clostridiales	Lachnospiraceae
Otu000200	346	0	12	1	0	147	17	161	8	0	0.017118	0.001765	0	0.226785	0.033527	0.295711	0.015169	Bacteria	Firmicutes	Clostridia	Clostridiales	Lachnospiraceae
Otu000009	342	26	30	7	119	42	40	6	72	0.046598	0.042795	0.012355	0.193515	0.064796	0.078888	0.01102	0.136519	Bacteria	Bacteroidetes	Bacteroidia	Bacteroidales	Muribaculaceae
Otu000100	331	4	2	3	25	71	53	65	108	0.007169	0.002853	0.005295	0.040654	0.109536	0.104526	0.119387	0.204778	Bacteria	Actinobacteria	Coriobacteriia	Coriobacteriales	Eggerthellaceae	Enterorhabdus
Otu000101	323	9	8	5	26	76	54	42	103	0.01613	0.011412	0.008825	0.042281	0.11725	0.106498	0.077142	0.195298	Bacteria	Actinobacteria	Coriobacteriia	Coriobacteriales	Eggerthellaceae
Otu000078	318	13	51	0	59	94	14	29	58	0.023299	0.072751	0	0.095944	0.145019	0.027611	0.053265	0.109973	Bacteria	Firmicutes	Clostridia	Clostridiales	Ruminococcaceae	Ruminiclostridium_5
Otu000222	307	0	0	2	0	41	201	16	47	0	0	0.00353	0	0.063253	0.396411	0.029387	0.089116	Bacteria	Firmicutes	Clostridia	Clostridiales	Lachnospiraceae
Otu000286	305	133	0	170	1	1	0	0	0	0.238368	0	0.300051	0.001626	0.001543	0	0	0	Bacteria	Proteobacteria	Gammaproteobacteria	Pseudomonadales	Pseudomonadaceae	Pseudomonas	Pseudomonas_pseudoalcaligenes
Otu000291	305	0	0	298	7	0	0	0	0	0	0	0.525972	0.011383	0	0	0	0	Bacteria	Actinobacteria	Actinobacteria	Micrococcales	Microbacteriaceae
Otu000154	300	0	0	0	1	36	98	45	120	0	0	0	0.001626	0.055539	0.193275	0.082652	0.227531	Bacteria	Actinobacteria	Coriobacteriia	Coriobacteriales	Eggerthellaceae	Enterorhabdus
Otu000192	295	0	2	0	0	135	38	117	3	0	0.002853	0	0	0.208272	0.074943	0.214896	0.005688	Bacteria	Firmicutes	Clostridia	Clostridiales	Lachnospiraceae
Otu000047	291	5	0	4	216	24	9	15	18	0.008961	0	0.00706	0.351254	0.037026	0.01775	0.027551	0.03413	Bacteria	Actinobacteria	Coriobacteriia	Coriobacteriales	Eggerthellaceae	Adlercreutzia
Otu000256	284	0	0	284	0	0	0	0	0	0	0	0.501262	0	0	0	0	0	Bacteria	Actinobacteria	Actinobacteria	Frankiales	Acidothermaceae	Acidothermus
Otu000020	274	1	12	15	217	8	1	1	19	0.001792	0.017118	0.026475	0.35288	0.012342	0.001972	0.001837	0.036026	Bacteria	Bacteroidetes	Bacteroidia	Bacteroidales	Muribaculaceae
Otu000046	274	10	20	0	66	60	8	90	20	0.017922	0.02853	0	0.107328	0.092565	0.015778	0.165304	0.037922	Bacteria	Bacteroidetes	Bacteroidia	Bacteroidales	Muribaculaceae
Otu000040	267	1	90	28	52	33	9	33	21	0.001792	0.128384	0.04942	0.084561	0.050911	0.01775	0.060612	0.039818	Bacteria	Bacteroidetes	Bacteroidia	Bacteroidales	Muribaculaceae	Muribaculum
Otu000260	267	0	0	266	1	0	0	0	0	0	0	0.469492	0.001626	0	0	0	0	Bacteria	Proteobacteria	Gammaproteobacteria	Betaproteobacteriales	Burkholderiaceae	Burkholderia-Caballeronia-Paraburkholderia
Otu000207	262	0	1	0	3	105	84	47	22	0	0.001426	0	0.004879	0.16199	0.165664	0.086326	0.041714	Bacteria	Firmicutes	Clostridia	Clostridiales	Lachnospiraceae
Otu000194	261	0	1	0	2	136	0	69	53	0	0.001426	0	0.003252	0.209815	0	0.126733	0.100493	Bacteria	Bacteroidetes	Bacteroidia	Bacteroidales	Muribaculaceae
Otu000179	259	0	1	0	1	60	44	143	10	0	0.001426	0	0.001626	0.092565	0.086776	0.26265	0.018961	Bacteria	Firmicutes	Clostridia	Clostridiales	Lachnospiraceae
Otu000075	258	11	9	26	30	52	6	36	88	0.019715	0.012838	0.04589	0.048785	0.080223	0.011833	0.066122	0.166856	Bacteria	Firmicutes	Clostridia	Clostridiales	Lachnospiraceae	Eubacterium_fissicatena_group
Otu000201	256	1	0	8	0	88	6	47	106	0.001792	0	0.01412	0	0.135763	0.011833	0.086326	0.200986	Bacteria	Firmicutes	Clostridia	Clostridiales	Lachnospiraceae	Blautia	Lachnospiraceae_bacterium_28-4
Otu000182	246	0	4	0	0	146	27	46	23	0	0.005706	0	0	0.225243	0.053249	0.084489	0.04361	Bacteria	Firmicutes	Clostridia	Clostridiales	Ruminococcaceae	Ruminiclostridium_5
Otu000206	246	4	0	7	1	49	101	27	57	0.007169	0	0.012355	0.001626	0.075595	0.199191	0.049591	0.108077	Bacteria	Firmicutes	Clostridia	Clostridiales	Family_XIII	Eubacterium_brachy_group
Otu000359	246	0	0	246	0	0	0	0	0	0	0	0.434192	0	0	0	0	0	Bacteria	Planctomycetes	Planctomycetacia	Pirellulales	Pirellulaceae
Otu000290	244	0	26	0	0	81	77	40	20	0	0.037089	0	0	0.124963	0.151859	0.073469	0.037922	Bacteria	Firmicutes	Clostridia	Clostridiales	Ruminococcaceae	Anaerotruncus
Otu000361	242	0	0	242	0	0	0	0	0	0	0	0.427132	0	0	0	0	0	Bacteria	Actinobacteria	Actinobacteria	Propionibacteriales	Nocardioidaceae	Nocardioides
Otu000117	236	8	1	2	8	46	139	24	8	0.014338	0.001426	0.00353	0.013009	0.070967	0.274135	0.044081	0.015169	Bacteria	Firmicutes	Clostridia	Clostridiales	Lachnospiraceae
Otu000367	235	78	0	157	0	0	0	0	0	0.139795	0	0.277106	0	0	0	0	0	Bacteria	Fusobacteria	Fusobacteriia	Fusobacteriales	Fusobacteriaceae	Cetobacterium
Otu000370	229	0	0	229	0	0	0	0	0	0	0	0.404187	0	0	0	0	0	Bacteria	Planctomycetes	Phycisphaerae	Tepidisphaerales	WD2101_soil_group
Otu000311	220	58	0	35	111	6	0	10	0	0.10395	0	0.061775	0.180505	0.009257	0	0.018367	0	Bacteria	Firmicutes	Bacilli	Lactobacillales	Lactobacillaceae	Lactobacillus
Otu000277	216	61	0	65	46	1	35	1	7	0.109327	0	0.114725	0.074804	0.001543	0.069027	0.001837	0.013273	Bacteria	Firmicutes	Bacilli	Lactobacillales	Lactobacillaceae	Lactobacillus	Lactobacillus_murinus
Otu000068	215	47	2	19	135	3	0	3	6	0.084235	0.002853	0.033535	0.219534	0.004628	0	0.00551	0.011377	Bacteria	Firmicutes	Erysipelotrichia	Erysipelotrichales	Erysipelotrichaceae	Dubosiella
Otu000343	211	1	1	196	5	8	0	0	0	0.001792	0.001426	0.345941	0.008131	0.012342	0	0	0	Bacteria	Actinobacteria	Coriobacteriia	Coriobacteriales	Eggerthellaceae
Otu000393	210	28	1	181	0	0	0	0	0	0.050183	0.001426	0.319466	0	0	0	0	0	Bacteria	Planctomycetes	Planctomycetacia	Isosphaerales	Isosphaeraceae	Isosphaera
Otu000092	208	0	79	33	14	21	4	13	44	0	0.112693	0.058245	0.022766	0.032398	0.007889	0.023877	0.083428	Bacteria	Bacteroidetes	Bacteroidia	Bacteroidales	Rikenellaceae	Alistipes
Otu000223	205	57	1	70	75	1	1	0	0	0.102158	0.001426	0.12355	0.121963	0.001543	0.001972	0	0	Bacteria	Proteobacteria	Gammaproteobacteria	Betaproteobacteriales	Burkholderiaceae	Curvibacter
Otu000167	201	0	0	0	11	120	2	57	11	0	0	0	0.017888	0.185131	0.003944	0.104693	0.020857	Bacteria	Firmicutes	Clostridia	Clostridiales	Lachnospiraceae	Lachnospiraceae_NK4A136_group
Otu000060	195	21	1	26	133	8	0	1	5	0.037637	0.001426	0.04589	0.216281	0.012342	0	0.001837	0.00948	Bacteria	Firmicutes	Erysipelotrichia	Erysipelotrichales	Erysipelotrichaceae	Dubosiella
Otu000285	194	15	0	95	83	1	0	0	0	0.026884	0	0.167676	0.134973	0.001543	0	0	0	Bacteria	Proteobacteria	Gammaproteobacteria	Enterobacteriales	Enterobacteriaceae	Escherichia-Shigella
Otu000416	191	0	0	191	0	0	0	0	0	0	0	0.337116	0	0	0	0	0	Bacteria	Bacteroidetes	Bacteroidia
Otu000424	185	0	0	185	0	0	0	0	0	0	0	0.326526	0	0	0	0	0	Bacteria	Gemmatimonadetes	Gemmatimonadetes	Gemmatimonadales	Gemmatimonadaceae	Gemmatimonas
Otu000008	183	73	6	58	36	2	8	0	0	0.130834	0.008559	0.10237	0.058542	0.003086	0.015778	0	0	Bacteria	Firmicutes	Erysipelotrichia	Erysipelotrichales	Erysipelotrichaceae	Turicibacter
Otu000329	181	0	45	0	0	19	0	7	110	0	0.064192	0	0	0.029312	0	0.012857	0.20857	Bacteria	Bacteroidetes	Bacteroidia	Bacteroidales	Muribaculaceae
Otu000391	181	0	0	181	0	0	0	0	0	0	0	0.319466	0	0	0	0	0	Bacteria
Otu000284	179	29	0	144	5	0	1	0	0	0.051975	0	0.254161	0.008131	0	0.001972	0	0	Bacteria	Proteobacteria	Gammaproteobacteria	Enterobacteriales	Enterobacteriaceae
Otu000151	175	0	24	24	2	65	37	12	11	0	0.034236	0.04236	0.003252	0.100279	0.072971	0.022041	0.020857	Bacteria	Firmicutes	Clostridia	Clostridiales	Ruminococcaceae	Ruminiclostridium_9
Otu000105	171	0	0	0	0	60	57	25	29	0	0	0	0	0.092565	0.112415	0.045918	0.054987	Bacteria	Firmicutes	Bacilli	Lactobacillales	Lactobacillaceae	Lactobacillus
Otu000142	171	2	0	6	1	74	42	30	16	0.003584	0	0.01059	0.001626	0.114164	0.082832	0.055101	0.030338	Bacteria	Firmicutes	Clostridia	Clostridiales	Lachnospiraceae	Lachnospiraceae_NK4A136_group
Otu000350	170	82	0	0	87	0	0	0	1	0.146964	0	0	0.141477	0	0	0	0.001896	Bacteria	Actinobacteria	Acidimicrobiia	Actinomarinales	Actinomarinaceae	Candidatus_Actinomarina
Otu000128	169	0	3	1	5	72	15	42	31	0	0.004279	0.001765	0.008131	0.111079	0.029583	0.077142	0.058779	Bacteria	Firmicutes	Clostridia	Clostridiales	Lachnospiraceae	Lachnospiraceae_NK4A136_group
Otu000446	165	0	0	165	0	0	0	0	0	0	0	0.291226	0	0	0	0	0	Bacteria	Actinobacteria	Acidimicrobiia	Microtrichales	Microtrichaceae
Otu000171	164	1	40	0	2	56	43	19	3	0.001792	0.05706	0	0.003252	0.086394	0.084804	0.034898	0.005688	Bacteria	Firmicutes	Clostridia	Clostridiales	Ruminococcaceae	Ruminiclostridium_9
Otu000030	162	2	5	12	33	16	46	11	37	0.003584	0.007132	0.02118	0.053664	0.024684	0.090721	0.020204	0.070155	Bacteria	Bacteroidetes	Bacteroidia	Bacteroidales	Muribaculaceae
Otu000265	162	30	0	44	88	0	0	0	0	0.053767	0	0.07766	0.143103	0	0	0	0	Bacteria	Proteobacteria	Gammaproteobacteria	Methylococcales	Cycloclasticaceae	Cycloclasticus
Otu000050	160	2	12	3	14	39	11	70	9	0.003584	0.017118	0.005295	0.022766	0.060168	0.021694	0.12857	0.017065	Bacteria	Bacteroidetes	Bacteroidia	Bacteroidales	Muribaculaceae
Otu000239	159	19	0	133	6	0	0	0	1	0.034053	0	0.234746	0.009757	0	0	0	0.001896	Bacteria	Proteobacteria	Gammaproteobacteria	Enterobacteriales	Enterobacteriaceae	Pantoea
Otu000164	158	6	0	17	135	0	0	0	0	0.010753	0	0.030005	0.219534	0	0	0	0	Bacteria	Cyanobacteria	Oxyphotobacteria	Chloroplast
Otu000318	158	0	3	0	0	17	134	1	3	0	0.004279	0	0	0.026227	0.264274	0.001837	0.005688	Bacteria	Firmicutes	Clostridia	Clostridiales	Ruminococcaceae	Anaerotruncus
Otu000246	157	1	1	0	0	53	0	29	73	0.001792	0.001426	0	0	0.081766	0	0.053265	0.138415	Bacteria	Firmicutes	Clostridia	Clostridiales	Ruminococcaceae	Ruminococcaceae_UCG-013
Otu000460	157	0	0	157	0	0	0	0	0	0	0	0.277106	0	0	0	0	0	Bacteria	Bacteroidetes	Bacteroidia	Bacteroidales	Muribaculaceae
Otu000217	154	37	1	78	37	1	0	0	0	0.066313	0.001426	0.137671	0.060168	0.001543	0	0	0	Bacteria	Firmicutes	Bacilli	Lactobacillales	Leuconostocaceae	Weissella	Weissella_confusa
Otu000157	153	0	0	0	0	45	35	72	1	0	0	0	0	0.069424	0.069027	0.132244	0.001896	Bacteria	Firmicutes	Clostridia	Clostridiales	Lachnospiraceae
Otu000283	153	19	0	0	131	2	1	0	0	0.034053	0	0	0.213029	0.003086	0.001972	0	0	Bacteria	Cyanobacteria	Oxyphotobacteria	Synechococcales	Cyanobiaceae	Synechococcus_CC9902
Otu000189	151	0	0	8	2	44	40	45	12	0	0	0.01412	0.003252	0.067881	0.078888	0.082652	0.022753	Bacteria	Firmicutes	Bacilli	Lactobacillales	Lactobacillaceae	Lactobacillus
Otu000144	150	33	0	45	65	0	1	3	3	0.059144	0	0.079425	0.105701	0	0.001972	0.00551	0.005688	Bacteria	Cyanobacteria	Oxyphotobacteria	Chloroplast	Cenchrus_americanus
Otu000309	150	34	0	51	63	0	0	1	1	0.060936	0	0.090015	0.102449	0	0	0.001837	0.001896	Bacteria	Proteobacteria	Gammaproteobacteria	Pseudomonadales	Pseudomonadaceae	Pseudomonas
Otu000473	149	0	0	149	0	0	0	0	0	0	0	0.262986	0	0	0	0	0	Bacteria	Firmicutes	Clostridia	Clostridiales	Clostridiaceae_1	Clostridium_sensu_stricto_1	Clostridium_sp_ND2
Otu000063	148	17	0	8	110	5	0	4	4	0.030468	0	0.01412	0.178879	0.007714	0	0.007347	0.007584	Bacteria	Firmicutes	Erysipelotrichia	Erysipelotrichales	Erysipelotrichaceae	Dubosiella
Otu000133	146	0	0	0	0	15	90	35	6	0	0	0	0	0.023141	0.177497	0.064285	0.011377	Bacteria	Firmicutes	Clostridia	Clostridiales	Lachnospiraceae
Otu000138	145	0	8	1	37	46	37	10	6	0	0.011412	0.001765	0.060168	0.070967	0.072971	0.018367	0.011377	Bacteria	Firmicutes	Clostridia	Clostridiales	Ruminococcaceae	Angelakisella
Otu000300	144	3	2	0	1	70	10	26	32	0.005377	0.002853	0	0.001626	0.107993	0.019722	0.047755	0.060675	Bacteria	Firmicutes	Clostridia	Clostridiales	Ruminococcaceae	Ruminiclostridium_5
Otu000087	143	5	0	0	0	104	1	20	13	0.008961	0	0	0	0.160447	0.001972	0.036734	0.024649	Bacteria	Firmicutes	Clostridia	Clostridiales	Ruminococcaceae	Oscillibacter
Otu000305	140	7	116	0	0	0	16	0	1	0.012546	0.165473	0	0	0	0.031555	0	0.001896	Bacteria	Firmicutes	Erysipelotrichia	Erysipelotrichales	Erysipelotrichaceae	Clostridium_innocuum_group
Otu000502	136	0	0	136	0	0	0	0	0	0	0	0.240041	0	0	0	0	0	Bacteria	Bacteroidetes	Bacteroidia	Bacteroidales
Otu000170	133	9	2	5	14	43	0	50	10	0.01613	0.002853	0.008825	0.022766	0.066339	0	0.091836	0.018961	Bacteria	Bacteroidetes	Bacteroidia	Bacteroidales	Muribaculaceae
Otu000234	131	0	0	0	3	33	30	39	26	0	0	0	0.004879	0.050911	0.059166	0.071632	0.049298	Bacteria	Firmicutes	Erysipelotrichia	Erysipelotrichales	Erysipelotrichaceae
Otu000253	131	1	0	1	0	34	44	36	15	0.001792	0	0.001765	0	0.052454	0.086776	0.066122	0.028441	Bacteria	Firmicutes	Bacilli	Lactobacillales	Lactobacillaceae	Lactobacillus
Otu000044	127	50	3	72	1	1	0	0	0	0.089612	0.004279	0.127081	0.001626	0.001543	0	0	0	Bacteria	Bacteroidetes	Bacteroidia	Bacteroidales	Prevotellaceae	Prevotellaceae_NK3B31_group
Otu000141	127	1	0	1	123	0	0	1	1	0.001792	0	0.001765	0.20002	0	0	0.001837	0.001896	Bacteria	Firmicutes	Erysipelotrichia	Erysipelotrichales	Erysipelotrichaceae	Allobaculum
Otu000102	125	10	2	2	17	14	79	1	0	0.017922	0.002853	0.00353	0.027645	0.021599	0.155803	0.001837	0	Bacteria	Firmicutes	Clostridia	Clostridiales	Lachnospiraceae
Otu000272	123	1	0	0	0	67	25	24	6	0.001792	0	0	0	0.103365	0.049305	0.044081	0.011377	Bacteria	Firmicutes	Clostridia	Clostridiales	Lachnospiraceae	Lachnospiraceae_NK4A136_group
Otu000091	121	4	8	2	68	3	7	3	26	0.007169	0.011412	0.00353	0.11058	0.004628	0.013805	0.00551	0.049298	Bacteria	Bacteroidetes	Bacteroidia	Bacteroidales	Prevotellaceae	Prevotellaceae_UCG-001
Otu000085	120	1	17	12	17	18	4	40	11	0.001792	0.02425	0.02118	0.027645	0.02777	0.007889	0.073469	0.020857	Bacteria	Bacteroidetes	Bacteroidia	Bacteroidales	Muribaculaceae
Otu000288	120	0	0	0	1	22	1	5	91	0	0	0	0.001626	0.033941	0.001972	0.009184	0.172545	Bacteria	Bacteroidetes	Bacteroidia	Bacteroidales	Prevotellaceae
Otu000119	119	0	2	1	7	64	2	43	0	0	0.002853	0.001765	0.011383	0.098736	0.003944	0.078979	0	Bacteria	Firmicutes	Clostridia	Clostridiales	Lachnospiraceae
Otu000314	114	0	0	0	0	3	16	1	94	0	0	0	0	0.004628	0.031555	0.001837	0.178233	Bacteria	Firmicutes	Clostridia	Clostridiales	Ruminococcaceae	Ruminococcaceae_UCG-014
Otu000362	113	0	0	1	0	18	63	6	25	0	0	0.001765	0	0.02777	0.124248	0.01102	0.047402	Bacteria	Firmicutes	Clostridia	Clostridiales	Lachnospiraceae
Otu000041	110	1	7	1	67	7	14	2	11	0.001792	0.009985	0.001765	0.108954	0.010799	0.027611	0.003673	0.020857	Bacteria	Bacteroidetes	Bacteroidia	Bacteroidales	Muribaculaceae
Otu000395	109	27	0	22	17	0	38	1	4	0.048391	0	0.03883	0.027645	0	0.074943	0.001837	0.007584	Bacteria	Firmicutes	Bacilli	Lactobacillales	Lactobacillaceae	Lactobacillus	Lactobacillus_murinus
Otu000273	106	0	0	0	4	33	49	9	11	0	0	0	0.006505	0.050911	0.096637	0.01653	0.020857	Bacteria	Firmicutes	Clostridia	Clostridiales	Ruminococcaceae
Otu000302	106	0	0	0	0	55	0	34	17	0	0	0	0	0.084852	0	0.062448	0.032234	Bacteria	Bacteroidetes	Bacteroidia	Bacteroidales	Muribaculaceae
Otu000106	105	19	0	11	66	1	0	5	3	0.034053	0	0.019415	0.107328	0.001543	0	0.009184	0.005688	Bacteria	Firmicutes	Erysipelotrichia	Erysipelotrichales	Erysipelotrichaceae	Dubosiella
Otu000084	104	0	1	3	5	31	17	17	30	0	0.001426	0.005295	0.008131	0.047825	0.033527	0.031224	0.056883	Bacteria	Firmicutes	Clostridia	Clostridiales	Lachnospiraceae	Eubacterium_xylanophilum_group
Otu000544	104	30	0	0	74	0	0	0	0	0.053767	0	0	0.120337	0	0	0	0	Bacteria	Proteobacteria	Gammaproteobacteria	Alteromonadales	Colwelliaceae	Thalassotalea
Otu000224	101	0	0	0	8	55	16	18	4	0	0	0	0.013009	0.084852	0.031555	0.033061	0.007584	Bacteria	Firmicutes	Clostridia	Clostridiales	Lachnospiraceae	Lachnospiraceae_NK4A136_group
Otu000440	101	15	0	48	36	0	0	2	0	0.026884	0	0.08472	0.058542	0	0	0.003673	0	Bacteria	Proteobacteria	Gammaproteobacteria	Betaproteobacteriales	Burkholderiaceae	Cupriavidus
Otu000238	99	0	0	0	1	19	35	42	2	0	0	0	0.001626	0.029312	0.069027	0.077142	0.003792	Bacteria	Firmicutes	Clostridia	Clostridiales	Ruminococcaceae	Butyricicoccus
Otu000352	99	1	1	0	0	68	6	23	0	0.001792	0.001426	0	0	0.104908	0.011833	0.042244	0	Bacteria	Firmicutes	Clostridia	Clostridiales	Ruminococcaceae	Anaerotruncus
Otu000048	98	4	9	5	75	2	1	1	1	0.007169	0.012838	0.008825	0.121963	0.003086	0.001972	0.001837	0.001896	Bacteria	Firmicutes	Clostridia	Clostridiales	Lachnospiraceae	Roseburia
Otu000066	98	2	4	47	44	0	0	1	0	0.003584	0.005706	0.082955	0.071552	0	0	0.001837	0	Bacteria	Bacteroidetes	Bacteroidia	Bacteroidales	Muribaculaceae
Otu000325	96	0	8	0	3	49	18	15	3	0	0.011412	0	0.004879	0.075595	0.035499	0.027551	0.005688	Bacteria	Firmicutes	Clostridia	Clostridiales	Ruminococcaceae
Otu000496	96	93	1	0	0	1	0	0	1	0.166679	0.001426	0	0	0.001543	0	0	0.001896	Bacteria	Proteobacteria	Gammaproteobacteria	Alteromonadales	Alteromonadaceae	Alteromonas
Otu000306	95	0	0	1	0	18	30	35	11	0	0	0.001765	0	0.02777	0.059166	0.064285	0.020857	Bacteria	Firmicutes	Bacilli	Lactobacillales	Lactobacillaceae	Lactobacillus
Otu000371	95	0	20	0	0	34	30	11	0	0	0.02853	0	0	0.052454	0.059166	0.020204	0	Bacteria	Firmicutes	Clostridia	Clostridiales	Ruminococcaceae	Ruminiclostridium_5
Otu000445	94	0	0	0	0	41	21	24	8	0	0	0	0	0.063253	0.041416	0.044081	0.015169	Bacteria	Firmicutes	Clostridia	Clostridiales	Lachnospiraceae
Otu000640	94	1	0	93	0	0	0	0	0	0.001792	0	0.164146	0	0	0	0	0	Bacteria	Proteobacteria	Gammaproteobacteria	Pseudomonadales	Pseudomonadaceae	Pseudomonas
Otu000508	93	13	0	80	0	0	0	0	0	0.023299	0	0.141201	0	0	0	0	0	Bacteria	Cyanobacteria	Oxyphotobacteria	Synechococcales	Cyanobiaceae	Cyanobium_PCC-6307
Otu000097	92	0	0	3	80	0	0	7	2	0	0	0.005295	0.130094	0	0	0.012857	0.003792	Bacteria	Actinobacteria	Coriobacteriia	Coriobacteriales	Atopobiaceae
Otu000069	91	13	1	10	35	10	9	13	0	0.023299	0.001426	0.01765	0.056916	0.015428	0.01775	0.023877	0	Bacteria	Bacteroidetes	Bacteroidia	Bacteroidales	Muribaculaceae
Otu000178	91	0	2	0	2	8	34	37	8	0	0.002853	0	0.003252	0.012342	0.067055	0.067958	0.015169	Bacteria	Firmicutes	Clostridia	Clostridiales	Lachnospiraceae
Otu000585	90	14	0	0	76	0	0	0	0	0.025091	0	0	0.123589	0	0	0	0	Bacteria	Proteobacteria	Gammaproteobacteria	Oceanospirillales	Nitrincolaceae	Neptuniibacter
Otu000415	89	21	2	22	12	1	29	0	2	0.037637	0.002853	0.03883	0.019514	0.001543	0.057194	0	0.003792	Bacteria	Firmicutes	Bacilli	Lactobacillales	Lactobacillaceae	Lactobacillus
Otu000673	89	0	0	89	0	0	0	0	0	0	0	0.157086	0	0	0	0	0	Bacteria	Proteobacteria	Gammaproteobacteria
Otu000124	88	2	3	4	16	21	0	9	33	0.003584	0.004279	0.00706	0.026019	0.032398	0	0.01653	0.062571	Bacteria	Firmicutes	Clostridia	Clostridiales	Ruminococcaceae	Ruminococcaceae_UCG-013
Otu000691	88	0	0	0	88	0	0	0	0	0	0	0	0.143103	0	0	0	0	Bacteria	Proteobacteria	Alphaproteobacteria
Otu000629	87	1	75	0	0	7	0	3	1	0.001792	0.106987	0	0	0.010799	0	0.00551	0.001896	Bacteria	Proteobacteria	Alphaproteobacteria	Rhodospirillales
Otu000280	85	0	70	0	9	4	0	2	0	0	0.099854	0	0.014636	0.006171	0	0.003673	0	Bacteria	Firmicutes	Clostridia	Clostridiales	Lachnospiraceae	Lachnospiraceae_NK4A136_group
Otu000669	85	60	0	0	25	0	0	0	0	0.107535	0	0	0.040654	0	0	0	0	Bacteria	Proteobacteria	Gammaproteobacteria	Alteromonadales	Colwelliaceae	Colwellia
Otu000694	84	0	0	84	0	0	0	0	0	0	0	0.148261	0	0	0	0	0	Bacteria	Actinobacteria	Actinobacteria	Corynebacteriales	Corynebacteriaceae	Corynebacterium_1	Corynebacterium_glutamicum
Otu000051	83	17	1	14	29	14	2	1	5	0.030468	0.001426	0.02471	0.047159	0.021599	0.003944	0.001837	0.00948	Bacteria	Bacteroidetes	Bacteroidia	Bacteroidales	Muribaculaceae
Otu000595	83	0	58	0	0	3	0	0	22	0	0.082737	0	0	0.004628	0	0	0.041714	Bacteria	Bacteroidetes	Bacteroidia	Bacteroidales
Otu000718	82	0	0	82	0	0	0	0	0	0	0	0.144731	0	0	0	0	0	Bacteria	Firmicutes	Bacilli	Bacillales	Planococcaceae
Otu000728	82	23	41	0	0	0	17	0	1	0.041222	0.058486	0	0	0	0.033527	0	0.001896	Bacteria	Firmicutes	Clostridia	Clostridiales	Lachnospiraceae	Lachnoclostridium	Lachnoclostridium_sp_YL32
Otu000342	80	79	0	0	1	0	0	0	0	0.141587	0	0	0.001626	0	0	0	0	Bacteria	Proteobacteria	Gammaproteobacteria	Oceanospirillales	Halomonadaceae	Halomonas
Otu000534	80	0	0	0	0	34	0	22	24	0	0	0	0	0.052454	0	0.040408	0.045506	Bacteria	Bacteroidetes	Bacteroidia	Bacteroidales	Muribaculaceae
Otu000198	78	0	0	0	0	23	10	41	4	0	0	0	0	0.035483	0.019722	0.075305	0.007584	Bacteria	Firmicutes	Clostridia	Clostridiales	Lachnospiraceae
Otu000312	78	1	75	0	2	0	0	0	0	0.001792	0.106987	0	0.003252	0	0	0	0	Bacteria	Bacteroidetes	Bacteroidia	Bacteroidales	Tannerellaceae	Parabacteroides	Parabacteroides_goldsteinii
Otu000571	77	5	0	39	33	0	0	0	0	0.008961	0	0.068835	0.053664	0	0	0	0	Bacteria	Cyanobacteria	Oxyphotobacteria	Chloroplast	Selaginella_moellendorffii
Otu000765	77	0	0	0	77	0	0	0	0	0	0	0	0.125215	0	0	0	0	Bacteria	Chloroflexi	Ktedonobacteria	Ktedonobacterales	JG30-KF-AS9
Otu000083	76	3	23	17	13	1	2	5	12	0.005377	0.032809	0.030005	0.02114	0.001543	0.003944	0.009184	0.022753	Bacteria	Firmicutes	Clostridia	Clostridiales	Ruminococcaceae	Ruminiclostridium_9
Otu000403	76	0	0	0	0	41	14	8	13	0	0	0	0	0.063253	0.027611	0.014694	0.024649	Bacteria	Firmicutes	Clostridia	Clostridiales	Lachnospiraceae
Otu000777	76	0	0	76	0	0	0	0	0	0	0	0.134141	0	0	0	0	0	Bacteria	Firmicutes	Clostridia	Clostridiales	Eubacteriaceae	Acetobacterium
Otu000059	75	12	1	1	40	8	4	3	6	0.021507	0.001426	0.001765	0.065047	0.012342	0.007889	0.00551	0.011377	Bacteria	Bacteroidetes	Bacteroidia	Bacteroidales	Muribaculaceae
Otu000770	74	0	0	0	74	0	0	0	0	0	0	0	0.120337	0	0	0	0	Bacteria	Chloroflexi	Anaerolineae	RBG-13-54-9
Otu000022	71	5	6	3	27	18	3	3	6	0.008961	0.008559	0.005295	0.043907	0.02777	0.005917	0.00551	0.011377	Bacteria	Bacteroidetes	Bacteroidia	Bacteroidales	Prevotellaceae	Alloprevotella
Otu000139	71	0	1	3	0	16	19	30	2	0	0.001426	0.005295	0	0.024684	0.037472	0.055101	0.003792	Bacteria	Firmicutes	Clostridia	Clostridiales	Lachnospiraceae
Otu000264	71	0	0	27	0	8	11	4	21	0	0	0.047655	0	0.012342	0.021694	0.007347	0.039818	Bacteria	Firmicutes	Clostridia	Clostridiales	Lachnospiraceae	Tyzzerella
Otu000819	71	0	0	0	71	0	0	0	0	0	0	0	0.115458	0	0	0	0	Bacteria	Epsilonbacteraeota	Campylobacteria	Campylobacterales	Arcobacteraceae	Arcobacter
Otu000569	70	39	0	0	30	0	1	0	0	0.069897	0	0	0.048785	0	0.001972	0	0	Bacteria	Proteobacteria	Gammaproteobacteria	Alteromonadales	Idiomarinaceae	Idiomarina	Idiomarina_indica
Otu000613	69	21	0	20	24	1	0	2	1	0.037637	0	0.0353	0.039028	0.001543	0	0.003673	0.001896	Bacteria	Firmicutes	Bacilli	Lactobacillales	Lactobacillaceae	Lactobacillus
Otu000826	69	11	0	57	0	1	0	0	0	0.019715	0	0.100605	0	0.001543	0	0	0	Bacteria	Proteobacteria	Gammaproteobacteria	Alteromonadales	Colwelliaceae	Thalassotalea	Thalassotalea_euphylliae
Otu000231	66	0	0	1	0	10	52	2	1	0	0	0.001765	0	0.015428	0.102554	0.003673	0.001896	Bacteria	Firmicutes	Clostridia	Clostridiales	Lachnospiraceae
Otu000150	63	4	2	2	2	1	4	0	48	0.007169	0.002853	0.00353	0.003252	0.001543	0.007889	0	0.091013	Bacteria	Bacteroidetes	Bacteroidia	Bacteroidales	Muribaculaceae
Otu000274	63	21	1	3	33	4	0	0	1	0.037637	0.001426	0.005295	0.053664	0.006171	0	0	0.001896	Bacteria	Firmicutes	Bacilli	Bacillales	Staphylococcaceae	Staphylococcus	Staphylococcus_lentus
Otu000242	61	0	0	0	1	33	12	10	5	0	0	0	0.001626	0.050911	0.023666	0.018367	0.00948	Bacteria	Firmicutes	Clostridia	Clostridiales	Lachnospiraceae
Otu000292	61	0	0	0	10	0	44	7	0	0	0	0	0.016262	0	0.086776	0.012857	0	Bacteria	Firmicutes	Clostridia	Clostridiales	Lachnospiraceae
Otu000347	61	0	0	0	1	41	1	16	2	0	0	0	0.001626	0.063253	0.001972	0.029387	0.003792	Bacteria	Firmicutes	Clostridia	Clostridiales	Ruminococcaceae
Otu000379	61	0	57	1	0	0	1	2	0	0	0.08131	0.001765	0	0	0.001972	0.003673	0	Bacteria	Firmicutes	Clostridia	Clostridiales	Ruminococcaceae
Otu000341	60	0	0	0	1	33	3	23	0	0	0	0	0.001626	0.050911	0.005917	0.042244	0	Bacteria	Firmicutes	Clostridia	Clostridiales	Lachnospiraceae
Otu000257	57	0	4	17	0	10	3	10	13	0	0.005706	0.030005	0	0.015428	0.005917	0.018367	0.024649	Bacteria	Firmicutes	Clostridia	Clostridiales	Lachnospiraceae	GCA-900066575
Otu000716	57	9	0	0	47	0	0	0	1	0.01613	0	0	0.07643	0	0	0	0.001896	Bacteria	Firmicutes	Bacilli	Bacillales	Paenibacillaceae	Brevibacillus	Brevibacillus_laterosporus
Otu000912	57	0	0	57	0	0	0	0	0	0	0	0.100605	0	0	0	0	0	Bacteria	Bacteroidetes	Bacteroidia	Sphingobacteriales	Sphingobacteriaceae	Sphingobacterium
Otu000176	56	0	0	1	54	0	0	1	0	0	0	0.001765	0.087813	0	0	0.001837	0	Bacteria	Patescibacteria	Saccharimonadia	Saccharimonadales
Otu000266	56	0	0	1	3	28	0	12	12	0	0	0.001765	0.004879	0.043197	0	0.022041	0.022753	Bacteria	Firmicutes	Erysipelotrichia	Erysipelotrichales	Erysipelotrichaceae
Otu000281	56	0	1	0	6	18	9	15	7	0	0.001426	0	0.009757	0.02777	0.01775	0.027551	0.013273	Bacteria	Firmicutes	Clostridia	Clostridiales	Lachnospiraceae	Lachnoclostridium
Otu000776	56	0	0	0	0	26	19	6	5	0	0	0	0	0.040112	0.037472	0.01102	0.00948	Bacteria	Firmicutes	Clostridia	Clostridiales	Lachnospiraceae
Otu000137	55	0	1	2	7	29	4	10	2	0	0.001426	0.00353	0.011383	0.04474	0.007889	0.018367	0.003792	Bacteria	Firmicutes	Clostridia	Clostridiales	Lachnospiraceae
Otu000489	55	10	0	19	24	0	1	1	0	0.017922	0	0.033535	0.039028	0	0.001972	0.001837	0	Bacteria	Proteobacteria	Gammaproteobacteria	Betaproteobacteriales	Burkholderiaceae	Ralstonia
Otu001005	54	0	0	0	54	0	0	0	0	0	0	0	0.087813	0	0	0	0	Bacteria	Actinobacteria	Actinobacteria
Otu000681	53	11	0	17	9	0	15	0	1	0.019715	0	0.030005	0.014636	0	0.029583	0	0.001896	Bacteria	Firmicutes	Bacilli	Lactobacillales	Lactobacillaceae	Lactobacillus	Lactobacillus_murinus
Otu000180	52	6	1	45	0	0	0	0	0	0.010753	0.001426	0.079425	0	0	0	0	0	Bacteria	Firmicutes	Clostridia	Clostridiales	Ruminococcaceae	Ruminococcaceae_UCG-005
Otu000230	52	0	0	0	1	41	4	5	1	0	0	0	0.001626	0.063253	0.007889	0.009184	0.001896	Bacteria	Firmicutes	Clostridia	Clostridiales	Lachnospiraceae	Lachnoclostridium
Otu000402	51	1	12	0	0	7	0	2	29	0.001792	0.017118	0	0	0.010799	0	0.003673	0.054987	Bacteria	Bacteroidetes	Bacteroidia	Bacteroidales	Muribaculaceae
Otu000413	51	2	0	22	27	0	0	0	0	0.003584	0	0.03883	0.043907	0	0	0	0	Bacteria	Firmicutes	Bacilli	Bacillales	Staphylococcaceae	Staphylococcus
Otu000425	50	1	0	0	0	33	0	6	10	0.001792	0	0	0	0.050911	0	0.01102	0.018961	Bacteria	Firmicutes	Erysipelotrichia	Erysipelotrichales	Erysipelotrichaceae	Candidatus_Stoquefichus
Otu000559	50	47	0	0	3	0	0	0	0	0.084235	0	0	0.004879	0	0	0	0	Bacteria	Firmicutes	Bacilli	Lactobacillales	Streptococcaceae	Lactococcus	Lactococcus_lactis
Otu000805	50	0	0	0	0	13	0	9	28	0	0	0	0	0.020056	0	0.01653	0.053091	Bacteria	Bacteroidetes	Bacteroidia	Bacteroidales	Muribaculaceae
Otu000840	50	11	0	9	27	1	0	2	0	0.019715	0	0.015885	0.043907	0.001543	0	0.003673	0	Bacteria	Firmicutes	Bacilli	Lactobacillales	Lactobacillaceae	Lactobacillus
Otu000896	50	0	1	0	0	26	1	22	0	0	0.001426	0	0	0.040112	0.001972	0.040408	0	Bacteria	Firmicutes	Clostridia	Clostridiales	Lachnospiraceae	Lachnospiraceae_NK4A136_group
Otu000025	49	18	3	14	13	1	0	0	0	0.03226	0.004279	0.02471	0.02114	0.001543	0	0	0	Bacteria	Firmicutes	Clostridia	Clostridiales	Peptostreptococcaceae	Romboutsia
Otu000564	49	33	0	0	16	0	0	0	0	0.059144	0	0	0.026019	0	0	0	0	Bacteria	Proteobacteria	Gammaproteobacteria	Oceanospirillales	Halomonadaceae	Halomonas
Otu000299	48	1	42	1	2	1	0	0	1	0.001792	0.059913	0.001765	0.003252	0.001543	0	0	0.001896	Bacteria	Verrucomicrobia	Verrucomicrobiae	Verrucomicrobiales	Akkermansiaceae	Akkermansia	Akkermansia_muciniphila
Otu000321	48	3	0	2	19	11	0	10	3	0.005377	0	0.00353	0.030897	0.01697	0	0.018367	0.005688	Bacteria	Bacteroidetes	Bacteroidia	Bacteroidales	Muribaculaceae
Otu000548	48	48	0	0	0	0	0	0	0	0.086028	0	0	0	0	0	0	0	Bacteria	Proteobacteria	Gammaproteobacteria	Oceanospirillales	Halomonadaceae	Halomonas
Otu000593	48	0	0	0	0	3	28	1	16	0	0	0	0	0.004628	0.055221	0.001837	0.030338	Bacteria	Bacteroidetes	Bacteroidia	Bacteroidales
Otu000707	47	11	0	16	7	0	12	0	1	0.019715	0	0.02824	0.011383	0	0.023666	0	0.001896	Bacteria	Firmicutes	Bacilli	Lactobacillales	Lactobacillaceae	Lactobacillus	Lactobacillus_murinus
Otu001100	47	0	0	47	0	0	0	0	0	0	0	0.082955	0	0	0	0	0	Bacteria	Proteobacteria	Gammaproteobacteria	Gammaproteobacteria_Incertae_Sedis	Unknown_Family	Alkalimarinus
Otu000634	46	0	31	0	0	0	0	0	15	0	0.044221	0	0	0	0	0	0.028441	Bacteria	Bacteroidetes	Bacteroidia	Bacteroidales
Otu000836	46	11	0	9	24	1	0	1	0	0.019715	0	0.015885	0.039028	0.001543	0	0.001837	0	Bacteria	Firmicutes	Bacilli	Lactobacillales	Lactobacillaceae	Lactobacillus
Otu001097	46	0	0	46	0	0	0	0	0	0	0	0.08119	0	0	0	0	0	Bacteria	Firmicutes	Clostridia	Clostridiales	Lachnospiraceae	Ruminococcus_torques_group
Otu001117	46	0	0	0	0	46	0	0	0	0	0	0	0	0.070967	0	0	0	Bacteria	Cyanobacteria	Oxyphotobacteria	Chloroplast
Otu001076	45	45	0	0	0	0	0	0	0	0.080651	0	0	0	0	0	0	0	Bacteria	Epsilonbacteraeota	Campylobacteria	Campylobacterales	Arcobacteraceae	Arcobacter
Otu000211	44	0	1	0	2	11	13	16	1	0	0.001426	0	0.003252	0.01697	0.025638	0.029387	0.001896	Bacteria	Firmicutes	Clostridia	Clostridiales	Lachnospiraceae
Otu000418	44	0	0	0	2	8	0	1	33	0	0	0	0.003252	0.012342	0	0.001837	0.062571	Bacteria	Bacteroidetes	Bacteroidia	Bacteroidales	Prevotellaceae
Otu000578	44	44	0	0	0	0	0	0	0	0.078859	0	0	0	0	0	0	0	Bacteria	Proteobacteria	Alphaproteobacteria	Sphingomonadales	Sphingomonadaceae	Sphingomonas
Otu000202	43	21	0	19	1	0	0	2	0	0.037637	0	0.033535	0.001626	0	0	0.003673	0	Bacteria	Proteobacteria	Alphaproteobacteria	Rhizobiales	Xanthobacteraceae
Otu001152	43	0	0	0	43	0	0	0	0	0	0	0	0.069926	0	0	0	0	Bacteria	Firmicutes	Clostridia	Clostridiales	Clostridiaceae_1	Clostridium_sensu_stricto_18
Otu000175	42	9	28	0	1	0	0	1	3	0.01613	0.039942	0	0.001626	0	0	0.001837	0.005688	Bacteria	Bacteroidetes	Bacteroidia	Bacteroidales	Rikenellaceae	Alistipes
Otu000226	42	0	0	0	3	2	4	2	31	0	0	0	0.004879	0.003086	0.007889	0.003673	0.058779	Bacteria	Firmicutes	Clostridia	Clostridiales	Ruminococcaceae
Otu000710	42	6	0	13	8	1	13	0	1	0.010753	0	0.022945	0.013009	0.001543	0.025638	0	0.001896	Bacteria	Firmicutes	Bacilli	Lactobacillales	Lactobacillaceae	Lactobacillus	Lactobacillus_murinus
Otu000802	42	42	0	0	0	0	0	0	0	0.075274	0	0	0	0	0	0	0	Bacteria	Actinobacteria	Acidimicrobiia	Actinomarinales	Actinomarinaceae	Candidatus_Actinomarina
Otu000943	42	0	0	0	42	0	0	0	0	0	0	0	0.068299	0	0	0	0	Bacteria	Proteobacteria	Alphaproteobacteria	Rhodospirillales	AEGEAN-169_marine_group
Otu001126	42	0	37	0	0	0	0	0	5	0	0.05278	0	0	0	0	0	0.00948	Bacteria	Bacteroidetes	Bacteroidia	Bacteroidales	Bacteroidaceae	Bacteroides
Otu001162	42	0	0	0	42	0	0	0	0	0	0	0	0.068299	0	0	0	0	Bacteria	Patescibacteria	Saccharimonadia	Saccharimonadales
Otu000214	41	1	3	1	36	0	0	0	0	0.001792	0.004279	0.001765	0.058542	0	0	0	0	Bacteria	Firmicutes	Clostridia	Clostridiales	Lachnospiraceae	Roseburia
Otu000304	41	0	22	0	0	16	0	3	0	0	0.031383	0	0	0.024684	0	0.00551	0	Bacteria	Firmicutes	Clostridia	Clostridiales	Ruminococcaceae	Oscillibacter
Otu001173	41	0	0	0	41	0	0	0	0	0	0	0	0.066673	0	0	0	0	Bacteria	Bacteroidetes	Bacteroidia	Flavobacteriales	Flavobacteriaceae	NS4_marine_group
Otu001193	41	0	0	41	0	0	0	0	0	0	0	0.072365	0	0	0	0	0	Bacteria	Firmicutes	Bacilli	Lactobacillales	Leuconostocaceae	Weissella
Otu000191	40	3	0	1	5	18	3	6	4	0.005377	0	0.001765	0.008131	0.02777	0.005917	0.01102	0.007584	Bacteria	Firmicutes	Clostridia	Clostridiales	Lachnospiraceae
Otu000298	40	0	3	2	0	10	2	17	6	0	0.004279	0.00353	0	0.015428	0.003944	0.031224	0.011377	Bacteria	Bacteroidetes	Bacteroidia	Bacteroidales	Muribaculaceae
Otu000376	40	1	0	0	0	0	38	0	1	0.001792	0	0	0	0	0.074943	0	0.001896	Bacteria	Firmicutes	Erysipelotrichia	Erysipelotrichales	Erysipelotrichaceae	Candidatus_Stoquefichus
Otu000382	40	0	0	0	0	9	18	9	4	0	0	0	0	0.013885	0.035499	0.01653	0.007584	Bacteria	Firmicutes	Clostridia	Clostridiales	Lachnospiraceae
Otu000636	40	8	0	14	11	0	6	0	1	0.014338	0	0.02471	0.017888	0	0.011833	0	0.001896	Bacteria	Firmicutes	Bacilli	Lactobacillales	Lactobacillaceae	Lactobacillus	Lactobacillus_murinus
Otu001175	40	1	0	0	39	0	0	0	0	0.001792	0	0	0.063421	0	0	0	0	Bacteria	Actinobacteria	Actinobacteria
Otu001205	40	0	0	0	40	0	0	0	0	0	0	0	0.065047	0	0	0	0	Bacteria
Otu001218	40	0	0	0	40	0	0	0	0	0	0	0	0.065047	0	0	0	0	Bacteria	Proteobacteria	Gammaproteobacteria	Pseudomonadales	Pseudomonadaceae	Pseudomonas
Otu000174	39	2	25	0	0	11	0	0	1	0.003584	0.035662	0	0	0.01697	0	0	0.001896	Bacteria	Firmicutes	Clostridia	Clostridiales	Family_XIII	Eubacterium_nodatum_group
Otu000282	39	0	1	0	6	0	0	0	32	0	0.001426	0	0.009757	0	0	0	0.060675	Bacteria	Firmicutes	Clostridia	Clostridiales	Ruminococcaceae	Ruminococcaceae_UCG-014
Otu000918	39	16	0	8	12	1	0	2	0	0.028676	0	0.01412	0.019514	0.001543	0	0.003673	0	Bacteria	Firmicutes	Bacilli	Lactobacillales	Lactobacillaceae	Lactobacillus	Lactobacillus_gasseri
Otu000323	38	34	0	0	0	0	0	1	3	0.060936	0	0	0	0	0	0.001837	0.005688	Bacteria	Acidobacteria	Acidobacteriia	Acidobacteriales
Otu000542	38	0	0	0	0	18	2	16	2	0	0	0	0	0.02777	0.003944	0.029387	0.003792	Bacteria	Bacteroidetes	Bacteroidia	Bacteroidales	Muribaculaceae
Otu001246	38	0	0	0	38	0	0	0	0	0	0	0	0.061795	0	0	0	0	Bacteria	Actinobacteria	Actinobacteria
Otu000072	37	4	2	1	12	4	0	5	9	0.007169	0.002853	0.001765	0.019514	0.006171	0	0.009184	0.017065	Bacteria	Actinobacteria	Coriobacteriia	Coriobacteriales	Eggerthellaceae	Enterorhabdus
Otu000693	37	1	0	0	36	0	0	0	0	0.001792	0	0	0.058542	0	0	0	0	Bacteria	Proteobacteria	Gammaproteobacteria	Methylococcales	Cycloclasticaceae	Cycloclasticus
Otu000837	37	10	0	14	4	0	9	0	0	0.017922	0	0.02471	0.006505	0	0.01775	0	0	Bacteria	Firmicutes	Bacilli	Lactobacillales	Lactobacillaceae	Lactobacillus	Lactobacillus_murinus
Otu000064	36	7	3	11	8	0	7	0	0	0.012546	0.004279	0.019415	0.013009	0	0.013805	0	0	Bacteria	Firmicutes	Clostridia	Clostridiales	Clostridiaceae_1	Clostridium_sensu_stricto_1
Otu000287	36	0	0	1	0	20	1	9	5	0	0	0.001765	0	0.030855	0.001972	0.01653	0.00948	Bacteria	Firmicutes	Clostridia	Clostridiales	Lachnospiraceae	ASF356
Otu000799	36	5	1	15	6	0	8	0	1	0.008961	0.001426	0.026475	0.009757	0	0.015778	0	0.001896	Bacteria	Firmicutes	Bacilli	Lactobacillales	Lactobacillaceae	Lactobacillus	Lactobacillus_murinus
Otu001253	36	0	0	0	36	0	0	0	0	0	0	0	0.058542	0	0	0	0	Bacteria	Actinobacteria	Acidimicrobiia	Microtrichales	Microtrichaceae
Otu001271	36	0	0	0	36	0	0	0	0	0	0	0	0.058542	0	0	0	0	Bacteria	Bacteroidetes	Bacteroidia	Flavobacteriales	Flavobacteriaceae	Winogradskyella
Otu000114	35	2	13	0	16	0	2	0	2	0.003584	0.018544	0	0.026019	0	0.003944	0	0.003792	Bacteria	Bacteroidetes	Bacteroidia	Bacteroidales	Muribaculaceae
Otu000162	35	6	0	4	23	0	0	1	1	0.010753	0	0.00706	0.037402	0	0	0.001837	0.001896	Bacteria	Firmicutes	Erysipelotrichia	Erysipelotrichales	Erysipelotrichaceae	Dubosiella
Otu000806	35	9	0	10	6	1	8	0	1	0.01613	0	0.01765	0.009757	0.001543	0.015778	0	0.001896	Bacteria	Firmicutes	Bacilli	Lactobacillales	Lactobacillaceae	Lactobacillus	Lactobacillus_murinus
Otu000467	34	0	0	0	0	3	4	0	27	0	0	0	0	0.004628	0.007889	0	0.051195	Bacteria	Firmicutes	Erysipelotrichia	Erysipelotrichales	Erysipelotrichaceae
Otu000811	34	22	0	3	1	3	1	3	1	0.039429	0	0.005295	0.001626	0.004628	0.001972	0.00551	0.001896	Bacteria	Firmicutes	Bacilli	Lactobacillales	Lactobacillaceae	Lactobacillus
Otu000107	33	0	2	0	28	0	2	1	0	0	0.002853	0	0.045533	0	0.003944	0.001837	0	Bacteria	Bacteroidetes	Bacteroidia	Bacteroidales	Muribaculaceae
Otu000373	33	0	26	0	0	3	0	0	4	0	0.037089	0	0	0.004628	0	0	0.007584	Bacteria	Firmicutes	Clostridia	Clostridiales	Clostridiales_vadinBB60_group
Otu000655	33	1	0	15	1	5	6	5	0	0.001792	0	0.026475	0.001626	0.007714	0.011833	0.009184	0	Bacteria	Firmicutes	Bacilli	Lactobacillales	Lactobacillaceae	Lactobacillus
Otu000801	33	0	0	0	33	0	0	0	0	0	0	0	0.053664	0	0	0	0	Bacteria	Proteobacteria	Gammaproteobacteria	Enterobacteriales	Enterobacteriaceae
Otu000268	32	0	3	0	3	3	0	12	11	0	0.004279	0	0.004879	0.004628	0	0.022041	0.020857	Bacteria	Firmicutes	Clostridia	Clostridiales	Ruminococcaceae	Ruminococcaceae_UCG-014
Otu000503	32	0	0	0	1	9	0	1	21	0	0	0	0.001626	0.013885	0	0.001837	0.039818	Bacteria	Bacteroidetes	Bacteroidia	Bacteroidales	Prevotellaceae
Otu000598	32	5	0	0	24	0	0	3	0	0.008961	0	0	0.039028	0	0	0.00551	0	Bacteria	Proteobacteria	Alphaproteobacteria	Caulobacterales	Caulobacteraceae
Otu000712	32	0	0	0	32	0	0	0	0	0	0	0	0.052038	0	0	0	0	Bacteria	Bacteroidetes	Bacteroidia	Flavobacteriales	Flavobacteriaceae	NS5_marine_group
Otu000723	32	0	5	0	0	4	0	8	15	0	0.007132	0	0	0.006171	0	0.014694	0.028441	Bacteria	Bacteroidetes	Bacteroidia	Bacteroidales	Muribaculaceae
Otu000333	31	0	4	0	0	12	5	9	1	0	0.005706	0	0	0.018513	0.009861	0.01653	0.001896	Bacteria	Firmicutes	Clostridia	Clostridiales	Lachnospiraceae	Lachnospiraceae_FCS020_group
Otu000365	31	0	20	1	6	0	0	3	1	0	0.02853	0.001765	0.009757	0	0	0.00551	0.001896	Bacteria	Verrucomicrobia	Verrucomicrobiae	Verrucomicrobiales	Akkermansiaceae	Akkermansia
Otu000449	31	0	0	0	0	10	2	10	9	0	0	0	0	0.015428	0.003944	0.018367	0.017065	Bacteria	Bacteroidetes	Bacteroidia	Bacteroidales	Muribaculaceae
Otu000628	31	0	0	0	0	14	0	8	9	0	0	0	0	0.021599	0	0.014694	0.017065	Bacteria	Bacteroidetes	Bacteroidia	Bacteroidales	Muribaculaceae
Otu000780	31	19	0	0	3	3	1	4	1	0.034053	0	0	0.004879	0.004628	0.001972	0.007347	0.001896	Bacteria	Firmicutes	Bacilli	Lactobacillales	Lactobacillaceae	Lactobacillus
Otu001141	31	0	0	0	0	0	0	7	24	0	0	0	0	0	0	0.012857	0.045506	Bacteria	Bacteroidetes	Bacteroidia	Bacteroidales	Muribaculaceae
Otu000090	30	8	1	21	0	0	0	0	0	0.014338	0.001426	0.037065	0	0	0	0	0	Bacteria	Firmicutes	Clostridia	Clostridiales	Ruminococcaceae	Ruminococcaceae_UCG-014
Otu000358	30	1	0	0	0	8	4	4	13	0.001792	0	0	0	0.012342	0.007889	0.007347	0.024649	Bacteria	Firmicutes	Clostridia	Clostridiales	Peptococcaceae
Otu000363	30	0	26	0	3	0	0	1	0	0	0.037089	0	0.004879	0	0	0.001837	0	Bacteria	Verrucomicrobia	Verrucomicrobiae	Verrucomicrobiales	Akkermansiaceae	Akkermansia
Otu000624	30	0	0	0	0	15	7	2	6	0	0	0	0	0.023141	0.013805	0.003673	0.011377	Bacteria	Firmicutes	Clostridia	Clostridiales	Lachnospiraceae	Lachnoclostridium
Otu000140	29	4	0	2	2	1	1	1	18	0.007169	0	0.00353	0.003252	0.001543	0.001972	0.001837	0.03413	Bacteria	Patescibacteria	Saccharimonadia	Saccharimonadales	Saccharimonadaceae	Candidatus_Saccharimonas
Otu000213	29	0	0	0	6	15	1	7	0	0	0	0	0.009757	0.023141	0.001972	0.012857	0	Bacteria	Firmicutes	Clostridia	Clostridiales	Lachnospiraceae
Otu000328	29	0	7	0	0	6	16	0	0	0	0.009985	0	0	0.009257	0.031555	0	0	Bacteria	Firmicutes	Clostridia	Clostridiales	Clostridiales_vadinBB60_group
Otu000339	29	24	0	0	1	2	0	2	0	0.043014	0	0	0.001626	0.003086	0	0.003673	0	Bacteria	Cyanobacteria	Oxyphotobacteria	Chloroplast
Otu000668	29	29	0	0	0	0	0	0	0	0.051975	0	0	0	0	0	0	0	Bacteria	Proteobacteria	Gammaproteobacteria	Nitrosococcales	Methylophagaceae	Methylophaga	Methylophaga_sulfidovorans
Otu000743	29	29	0	0	0	0	0	0	0	0.051975	0	0	0	0	0	0	0	Bacteria	Planctomycetes	Planctomycetacia	Isosphaerales	Isosphaeraceae	Aquisphaera
Otu000890	29	0	0	10	19	0	0	0	0	0	0	0.01765	0.030897	0	0	0	0	Bacteria	Proteobacteria	Gammaproteobacteria	Pseudomonadales	Pseudomonadaceae
Otu001224	29	7	0	5	15	0	0	2	0	0.012546	0	0.008825	0.024393	0	0	0.003673	0	Bacteria	Firmicutes	Bacilli	Lactobacillales	Lactobacillaceae	Lactobacillus
Otu001409	29	0	0	0	29	0	0	0	0	0	0	0	0.047159	0	0	0	0	Bacteria	Bacteroidetes	Bacteroidia	Chitinophagales	Saprospiraceae
Otu000220	28	0	0	14	11	1	0	0	2	0	0	0.02471	0.017888	0.001543	0	0	0.003792	Bacteria	Firmicutes	Clostridia	Clostridiales	Clostridiales_vadinBB60_group
Otu000646	28	0	0	0	0	13	3	10	2	0	0	0	0	0.020056	0.005917	0.018367	0.003792	Bacteria	Firmicutes	Clostridia	Clostridiales	Ruminococcaceae	Ruminiclostridium_5
Otu000734	28	2	0	0	26	0	0	0	0	0.003584	0	0	0.042281	0	0	0	0	Bacteria	Proteobacteria	Gammaproteobacteria	Enterobacteriales	Enterobacteriaceae	Pantoea
Otu001441	28	28	0	0	0	0	0	0	0	0.050183	0	0	0	0	0	0	0	Bacteria	Proteobacteria	Gammaproteobacteria	Oceanospirillales	Nitrincolaceae	Neptunomonas	Neptunomonas_phycophila
Otu001459	28	28	0	0	0	0	0	0	0	0.050183	0	0	0	0	0	0	0	Bacteria	Proteobacteria	Gammaproteobacteria	Betaproteobacteriales	SC-I-84
Otu000453	27	0	24	1	2	0	0	0	0	0	0.034236	0.001765	0.003252	0	0	0	0	Bacteria	Verrucomicrobia	Verrucomicrobiae	Verrucomicrobiales	Akkermansiaceae	Akkermansia	Akkermansia_muciniphila
Otu000808	27	6	0	11	3	0	6	0	1	0.010753	0	0.019415	0.004879	0	0.011833	0	0.001896	Bacteria	Firmicutes	Bacilli	Lactobacillales	Lactobacillaceae	Lactobacillus	Lactobacillus_murinus
Otu001154	27	0	0	0	0	1	25	0	1	0	0	0	0	0.001543	0.049305	0	0.001896	Bacteria	Epsilonbacteraeota	Campylobacteria	Campylobacterales	Helicobacteraceae	Helicobacter	Helicobacter_mastomyrinus
Otu001345	27	0	0	0	27	0	0	0	0	0	0	0	0.043907	0	0	0	0	Bacteria	Proteobacteria	Alphaproteobacteria	Puniceispirillales	SAR116_clade
Otu001475	27	0	27	0	0	0	0	0	0	0	0.038515	0	0	0	0	0	0	Bacteria	Firmicutes	Clostridia	Clostridiales	Lachnospiraceae	Blautia
Otu000181	26	8	3	0	0	4	2	0	9	0.014338	0.004279	0	0	0.006171	0.003944	0	0.017065	Bacteria	Bacteroidetes	Bacteroidia	Bacteroidales	Muribaculaceae
Otu000190	26	0	10	1	12	1	1	1	0	0	0.014265	0.001765	0.019514	0.001543	0.001972	0.001837	0	Bacteria	Firmicutes	Clostridia	Clostridiales	Ruminococcaceae
Otu000240	26	1	0	0	24	0	0	1	0	0.001792	0	0	0.039028	0	0	0.001837	0	Bacteria	Firmicutes	Erysipelotrichia	Erysipelotrichales	Erysipelotrichaceae	Dubosiella
Otu000332	26	0	23	0	3	0	0	0	0	0	0.032809	0	0.004879	0	0	0	0	Bacteria	Verrucomicrobia	Verrucomicrobiae	Verrucomicrobiales	Akkermansiaceae	Akkermansia	Akkermansia_muciniphila
Otu000456	26	0	6	6	0	1	2	2	9	0	0.008559	0.01059	0	0.001543	0.003944	0.003673	0.017065	Bacteria	Bacteroidetes	Bacteroidia	Bacteroidales	Rikenellaceae	Rikenellaceae_RC9_gut_group
Otu000491	26	0	4	0	0	6	8	2	6	0	0.005706	0	0	0.009257	0.015778	0.003673	0.011377	Bacteria	Firmicutes	Clostridia	Clostridiales	Ruminococcaceae	Ruminiclostridium_9
Otu001016	26	3	0	12	4	0	7	0	0	0.005377	0	0.02118	0.006505	0	0.013805	0	0	Bacteria	Firmicutes	Bacilli	Lactobacillales	Lactobacillaceae	Lactobacillus	Lactobacillus_murinus
Otu001506	26	26	0	0	0	0	0	0	0	0.046598	0	0	0	0	0	0	0	Bacteria	Proteobacteria	Gammaproteobacteria	Methylococcales	Cycloclasticaceae	Cycloclasticus
Otu000250	25	1	12	0	2	1	0	0	9	0.001792	0.017118	0	0.003252	0.001543	0	0	0.017065	Bacteria	Firmicutes	Clostridia	Clostridiales	Peptococcaceae
Otu000469	25	0	22	1	0	1	0	0	1	0	0.031383	0.001765	0	0.001543	0	0	0.001896	Bacteria	Verrucomicrobia	Verrucomicrobiae	Verrucomicrobiales	Akkermansiaceae	Akkermansia
Otu000495	25	0	21	1	3	0	0	0	0	0	0.029956	0.001765	0.004879	0	0	0	0	Bacteria	Verrucomicrobia	Verrucomicrobiae	Verrucomicrobiales	Akkermansiaceae	Akkermansia	Akkermansia_muciniphila
Otu000764	25	0	0	0	0	7	0	1	17	0	0	0	0	0.010799	0	0.001837	0.032234	Bacteria	Bacteroidetes	Bacteroidia	Bacteroidales	Prevotellaceae	Alloprevotella
Otu001096	25	7	0	11	3	1	3	0	0	0.012546	0	0.019415	0.004879	0.001543	0.005917	0	0	Bacteria	Firmicutes	Bacilli	Lactobacillales	Lactobacillaceae	Lactobacillus	Lactobacillus_murinus
Otu001529	25	25	0	0	0	0	0	0	0	0.044806	0	0	0	0	0	0	0	Bacteria	Proteobacteria	Alphaproteobacteria	Caulobacterales	Parvularculaceae	Amphiplicatus
Otu000431	24	0	0	1	0	6	1	16	0	0	0	0.001765	0	0.009257	0.001972	0.029387	0	Bacteria	Firmicutes	Clostridia	Clostridiales	Lachnospiraceae
Otu001019	24	6	0	6	8	0	2	0	2	0.010753	0	0.01059	0.013009	0	0.003944	0	0.003792	Bacteria	Firmicutes	Bacilli	Lactobacillales	Lactobacillaceae	Lactobacillus	Lactobacillus_murinus
Otu001379	24	4	0	13	7	0	0	0	0	0.007169	0	0.022945	0.011383	0	0	0	0	Bacteria	Firmicutes	Bacilli	Lactobacillales	Streptococcaceae	Streptococcus	Streptococcus_danieliae
Otu000186	23	0	4	0	0	0	0	2	17	0	0.005706	0	0	0	0	0.003673	0.032234	Bacteria	Firmicutes	Clostridia	Clostridiales	Ruminococcaceae	Ruminiclostridium_6
Otu000354	23	0	0	0	22	0	1	0	0	0	0	0	0.035776	0	0.001972	0	0	Bacteria	Firmicutes	Erysipelotrichia	Erysipelotrichales	Erysipelotrichaceae	Allobaculum
Otu001289	23	7	0	5	11	0	0	0	0	0.012546	0	0.008825	0.017888	0	0	0	0	Bacteria	Firmicutes	Bacilli	Lactobacillales	Lactobacillaceae	Lactobacillus
Otu001618	23	0	0	0	23	0	0	0	0	0	0	0	0.037402	0	0	0	0	Bacteria	Chloroflexi	Ktedonobacteria	Ktedonobacterales	JG30-KF-AS9
Otu000129	22	0	0	16	3	0	0	2	1	0	0	0.02824	0.004879	0	0	0.003673	0.001896	Bacteria	Firmicutes	Clostridia	Clostridiales	Ruminococcaceae	Eubacterium_coprostanoligenes_group
Otu000383	22	0	18	0	1	2	0	0	1	0	0.025677	0	0.001626	0.003086	0	0	0.001896	Bacteria	Verrucomicrobia	Verrucomicrobiae	Verrucomicrobiales	Akkermansiaceae	Akkermansia
Otu000749	22	0	1	0	0	1	0	8	12	0	0.001426	0	0	0.001543	0	0.014694	0.022753	Bacteria	Bacteroidetes	Bacteroidia	Bacteroidales	Muribaculaceae
Otu001018	22	1	0	0	0	9	3	8	1	0.001792	0	0	0	0.013885	0.005917	0.014694	0.001896	Bacteria	Firmicutes	Clostridia	Clostridiales	Lachnospiraceae	Lachnospiraceae_NK4A136_group
Otu001136	22	5	0	6	4	0	7	0	0	0.008961	0	0.01059	0.006505	0	0.013805	0	0	Bacteria	Firmicutes	Bacilli	Lactobacillales	Lactobacillaceae	Lactobacillus	Lactobacillus_murinus
Otu001196	22	0	22	0	0	0	0	0	0	0	0.031383	0	0	0	0	0	0	Bacteria	Bacteroidetes	Bacteroidia	Bacteroidales
Otu001436	22	0	0	0	0	0	20	2	0	0	0	0	0	0	0.039444	0.003673	0	Bacteria	Firmicutes	Clostridia	Clostridiales	Lachnospiraceae	ASF356
Otu001656	22	0	0	0	0	0	20	0	2	0	0	0	0	0	0.039444	0	0.003792	Bacteria	Firmicutes	Clostridia	Clostridiales	Ruminococcaceae	Ruminococcaceae_UCG-014
Otu001660	22	22	0	0	0	0	0	0	0	0.039429	0	0	0	0	0	0	0	Bacteria	Verrucomicrobia	Verrucomicrobiae
Otu000605	21	0	14	0	0	2	0	3	2	0	0.019971	0	0	0.003086	0	0.00551	0.003792	Bacteria	Bacteroidetes	Bacteroidia	Bacteroidales	Muribaculaceae
Otu000610	21	0	19	1	1	0	0	0	0	0	0.027103	0.001765	0.001626	0	0	0	0	Bacteria	Verrucomicrobia	Verrucomicrobiae	Verrucomicrobiales	Akkermansiaceae	Akkermansia	Akkermansia_muciniphila
Otu000922	21	0	0	0	0	12	0	2	7	0	0	0	0	0.018513	0	0.003673	0.013273	Bacteria	Bacteroidetes	Bacteroidia	Bacteroidales	Muribaculaceae
Otu001020	21	21	0	0	0	0	0	0	0	0.037637	0	0	0	0	0	0	0	Bacteria	Proteobacteria	Alphaproteobacteria	Rhizobiales	Xanthobacteraceae	Pseudolabrys
Otu001053	21	0	0	0	2	5	2	11	1	0	0	0	0.003252	0.007714	0.003944	0.020204	0.001896	Bacteria	Bacteroidetes	Bacteroidia	Bacteroidales	Muribaculaceae
Otu001668	21	0	0	0	21	0	0	0	0	0	0	0	0.03415	0	0	0	0	Bacteria	Firmicutes	Bacilli
Otu001680	21	21	0	0	0	0	0	0	0	0.037637	0	0	0	0	0	0	0	Bacteria	Verrucomicrobia	Verrucomicrobiae	Pedosphaerales	Pedosphaeraceae	ADurbBin063-1
Otu001681	21	0	0	0	21	0	0	0	0	0	0	0	0.03415	0	0	0	0	Bacteria	Verrucomicrobia	Verrucomicrobiae	Pedosphaerales	Pedosphaeraceae	SCGC_AAA164-E04
Otu001686	21	21	0	0	0	0	0	0	0	0.037637	0	0	0	0	0	0	0	Bacteria	Planctomycetes	Planctomycetacia	Isosphaerales	Isosphaeraceae	Aquisphaera
Otu001696	21	21	0	0	0	0	0	0	0	0.037637	0	0	0	0	0	0	0	Bacteria	Chloroflexi	Ktedonobacteria	Ktedonobacterales	Ktedonobacteraceae	1921-03-01
Otu001700	21	0	0	21	0	0	0	0	0	0	0	0.037065	0	0	0	0	0	Bacteria	Proteobacteria	Alphaproteobacteria	Rhodobacterales	Rhodobacteraceae	Rubellimicrobium
Otu000116	20	1	1	1	16	1	0	0	0	0.001792	0.001426	0.001765	0.026019	0.001543	0	0	0	Bacteria	Firmicutes	Clostridia	Clostridiales	Ruminococcaceae	Ruminococcaceae_UCG-014
Otu000132	20	0	1	1	18	0	0	0	0	0	0.001426	0.001765	0.029271	0	0	0	0	Bacteria	Firmicutes	Clostridia	Clostridiales	Ruminococcaceae	Ruminococcaceae_UCG-014
Otu000225	20	2	0	0	0	9	0	9	0	0.003584	0	0	0	0.013885	0	0.01653	0	Bacteria	Firmicutes	Clostridia	Clostridiales	Lachnospiraceae
Otu000468	20	0	0	0	0	5	0	9	6	0	0	0	0	0.007714	0	0.01653	0.011377	Bacteria	Firmicutes	Clostridia	Clostridiales	Ruminococcaceae	Ruminococcaceae_UCG-014
Otu000470	20	0	0	0	1	13	4	1	1	0	0	0	0.001626	0.020056	0.007889	0.001837	0.001896	Bacteria	Firmicutes	Clostridia	Clostridiales	Lachnospiraceae	Lachnospiraceae_NK4A136_group
Otu001013	20	1	0	1	0	3	8	5	2	0.001792	0	0.001765	0	0.004628	0.015778	0.009184	0.003792	Bacteria	Firmicutes	Bacilli	Lactobacillales	Lactobacillaceae	Lactobacillus
Otu001435	20	4	0	10	6	0	0	0	0	0.007169	0	0.01765	0.009757	0	0	0	0	Bacteria	Firmicutes	Bacilli	Lactobacillales	Streptococcaceae	Streptococcus	Streptococcus_danieliae
Otu001737	20	20	0	0	0	0	0	0	0	0.035845	0	0	0	0	0	0	0	Bacteria	Firmicutes	Clostridia	Clostridiales	Clostridiaceae_1	Clostridium_sensu_stricto_12
Otu000199	19	5	0	0	14	0	0	0	0	0.008961	0	0	0.022766	0	0	0	0	Bacteria	Firmicutes	Clostridia	Clostridiales	Lachnospiraceae	Lachnospiraceae_NK4A136_group
Otu000263	19	0	5	0	0	13	0	1	0	0	0.007132	0	0	0.020056	0	0.001837	0	Bacteria	Firmicutes	Clostridia	Clostridiales	Ruminococcaceae
Otu000477	19	0	17	2	0	0	0	0	0	0	0.02425	0.00353	0	0	0	0	0	Bacteria	Verrucomicrobia	Verrucomicrobiae	Verrucomicrobiales	Akkermansiaceae	Akkermansia	Akkermansia_muciniphila
Otu000576	19	0	0	0	0	6	0	12	1	0	0	0	0	0.009257	0	0.022041	0.001896	Bacteria	Bacteroidetes	Bacteroidia	Bacteroidales	Muribaculaceae
Otu000666	19	0	0	0	0	13	0	5	1	0	0	0	0	0.020056	0	0.009184	0.001896	Bacteria	Firmicutes	Clostridia	Clostridiales	Lachnospiraceae	Lachnoclostridium
Otu001058	19	0	0	19	0	0	0	0	0	0	0	0.033535	0	0	0	0	0	Bacteria	Firmicutes	Clostridia	Clostridiales	Peptococcaceae	Peptococcus
Otu001261	19	3	0	4	5	0	6	0	1	0.005377	0	0.00706	0.008131	0	0.011833	0	0.001896	Bacteria	Firmicutes	Bacilli	Lactobacillales	Lactobacillaceae	Lactobacillus	Lactobacillus_murinus
Otu001519	19	0	0	15	0	0	1	1	2	0	0	0.026475	0	0	0.001972	0.001837	0.003792	Bacteria	Firmicutes	Bacilli	Lactobacillales	Lactobacillaceae	Lactobacillus
Otu001615	19	19	0	0	0	0	0	0	0	0.034053	0	0	0	0	0	0	0	Bacteria	Cyanobacteria	Oxyphotobacteria	Synechococcales	Cyanobiaceae
Otu001708	19	0	0	0	19	0	0	0	0	0	0	0	0.030897	0	0	0	0	Bacteria	Actinobacteria	Actinobacteria	PeM15
Otu000159	18	8	3	1	4	2	0	0	0	0.014338	0.004279	0.001765	0.006505	0.003086	0	0	0	Bacteria	Firmicutes	Clostridia	Clostridiales	Lachnospiraceae
Otu000208	18	1	0	0	13	1	0	3	0	0.001792	0	0	0.02114	0.001543	0	0.00551	0	Bacteria	Firmicutes	Clostridia	Clostridiales	Lachnospiraceae
Otu000294	18	0	0	1	0	1	0	1	15	0	0	0.001765	0	0.001543	0	0.001837	0.028441	Bacteria	Firmicutes	Clostridia	Clostridiales	Lachnospiraceae	GCA-900066575
Otu000327	18	2	1	2	13	0	0	0	0	0.003584	0.001426	0.00353	0.02114	0	0	0	0	Bacteria	Firmicutes	Clostridia	Clostridiales	Lachnospiraceae
Otu000452	18	0	7	0	0	3	4	4	0	0	0.009985	0	0	0.004628	0.007889	0.007347	0	Bacteria	Firmicutes	Clostridia	Clostridiales	Lachnospiraceae
Otu000747	18	17	0	1	0	0	0	0	0	0.030468	0	0.001765	0	0	0	0	0	Bacteria	Firmicutes	Negativicutes	Selenomonadales	Acidaminococcaceae	Phascolarctobacterium	Phascolarctobacterium_faecium
Otu000897	18	10	0	1	0	2	0	5	0	0.017922	0	0.001765	0	0.003086	0	0.009184	0	Bacteria	Firmicutes	Bacilli	Lactobacillales	Lactobacillaceae	Lactobacillus
Otu001389	18	15	0	2	1	0	0	0	0	0.026884	0	0.00353	0.001626	0	0	0	0	Bacteria	Firmicutes	Bacilli	Lactobacillales	Lactobacillaceae	Lactobacillus
Otu001753	18	18	0	0	0	0	0	0	0	0.03226	0	0	0	0	0	0	0	Bacteria	Proteobacteria	Gammaproteobacteria	Xanthomonadales	Rhodanobacteraceae	Rhodanobacter
Otu001811	18	18	0	0	0	0	0	0	0	0.03226	0	0	0	0	0	0	0	Bacteria
Otu001819	18	18	0	0	0	0	0	0	0	0.03226	0	0	0	0	0	0	0	Bacteria	Actinobacteria	Actinobacteria	Micrococcales	Cellulomonadaceae	Pseudactinotalea
Otu000451	17	0	0	0	0	5	0	4	8	0	0	0	0	0.007714	0	0.007347	0.015169	Bacteria	Firmicutes	Clostridia	Clostridiales	Ruminococcaceae	Ruminococcaceae_UCG-014
Otu000494	17	0	17	0	0	0	0	0	0	0	0.02425	0	0	0	0	0	0	Bacteria	Verrucomicrobia	Verrucomicrobiae	Verrucomicrobiales	Akkermansiaceae	Akkermansia	Akkermansia_muciniphila
Otu000516	17	1	0	0	1	3	0	1	11	0.001792	0	0	0.001626	0.004628	0	0.001837	0.020857	Bacteria	Firmicutes	Clostridia	Clostridiales	Peptococcaceae
Otu000615	17	0	0	0	0	5	0	4	8	0	0	0	0	0.007714	0	0.007347	0.015169	Bacteria	Bacteroidetes	Bacteroidia	Bacteroidales	Muribaculaceae
Otu000964	17	0	0	0	0	1	0	3	13	0	0	0	0	0.001543	0	0.00551	0.024649	Bacteria	Bacteroidetes	Bacteroidia	Bacteroidales	Prevotellaceae
Otu000994	17	15	0	0	2	0	0	0	0	0.026884	0	0	0.003252	0	0	0	0	Bacteria	Proteobacteria	Gammaproteobacteria	Alteromonadales	Colwelliaceae
Otu001140	17	0	0	0	0	1	0	1	15	0	0	0	0	0.001543	0	0.001837	0.028441	Bacteria	Bacteroidetes	Bacteroidia	Bacteroidales	Muribaculaceae
Otu001167	17	0	0	0	0	3	0	0	14	0	0	0	0	0.004628	0	0	0.026545	Bacteria	Bacteroidetes	Bacteroidia	Bacteroidales	Prevotellaceae	Alloprevotella
Otu001203	17	8	0	1	0	3	0	4	1	0.014338	0	0.001765	0	0.004628	0	0.007347	0.001896	Bacteria	Firmicutes	Bacilli	Lactobacillales	Lactobacillaceae	Lactobacillus
Otu001265	17	4	0	4	2	0	6	1	0	0.007169	0	0.00706	0.003252	0	0.011833	0.001837	0	Bacteria	Firmicutes	Bacilli	Lactobacillales	Lactobacillaceae	Lactobacillus	Lactobacillus_murinus
Otu001810	17	0	14	0	0	0	0	0	3	0	0.019971	0	0	0	0	0	0.005688	Bacteria	Bacteroidetes	Bacteroidia	Bacteroidales	Tannerellaceae	Parabacteroides
Otu001873	17	17	0	0	0	0	0	0	0	0.030468	0	0	0	0	0	0	0	Bacteria	Actinobacteria	Actinobacteria
Otu000184	16	3	5	0	3	2	1	0	2	0.005377	0.007132	0	0.004879	0.003086	0.001972	0	0.003792	Bacteria	Bacteroidetes	Bacteroidia	Bacteroidales	Muribaculaceae
Otu000259	16	0	0	0	0	3	6	7	0	0	0	0	0	0.004628	0.011833	0.012857	0	Bacteria	Firmicutes	Clostridia	Clostridiales	Lachnospiraceae
Otu000303	16	2	0	1	0	9	0	4	0	0.003584	0	0.001765	0	0.013885	0	0.007347	0	Bacteria	Firmicutes	Clostridia	Clostridiales	Family_XIII	Family_XIII_UCG-001
Otu000386	16	2	0	0	12	1	1	0	0	0.003584	0	0	0.019514	0.001543	0.001972	0	0	Bacteria	Firmicutes	Erysipelotrichia	Erysipelotrichales	Erysipelotrichaceae	Dubosiella
Otu000501	16	1	0	0	0	8	0	3	4	0.001792	0	0	0	0.012342	0	0.00551	0.007584	Bacteria	Firmicutes	Clostridia	Clostridiales	Family_XIII	Eubacterium_brachy_group
Otu000720	16	2	0	0	3	2	0	8	1	0.003584	0	0	0.004879	0.003086	0	0.014694	0.001896	Bacteria	Bacteroidetes	Bacteroidia	Bacteroidales	Muribaculaceae
Otu000738	16	0	14	0	1	1	0	0	0	0	0.019971	0	0.001626	0.001543	0	0	0	Bacteria	Verrucomicrobia	Verrucomicrobiae	Verrucomicrobiales	Akkermansiaceae	Akkermansia
Otu000923	16	0	0	0	0	2	1	1	12	0	0	0	0	0.003086	0.001972	0.001837	0.022753	Bacteria	Bacteroidetes	Bacteroidia	Bacteroidales	Prevotellaceae
Otu001574	16	16	0	0	0	0	0	0	0	0.028676	0	0	0	0	0	0	0	Bacteria	Proteobacteria	Gammaproteobacteria	Aeromonadales
Otu001705	16	16	0	0	0	0	0	0	0	0.028676	0	0	0	0	0	0	0	Bacteria	Proteobacteria	Gammaproteobacteria	Cellvibrionales	Porticoccaceae	C1-B045
Otu000156	15	0	3	3	0	4	3	0	2	0	0.004279	0.005295	0	0.006171	0.005917	0	0.003792	Bacteria	Bacteroidetes	Bacteroidia	Bacteroidales	Muribaculaceae
Otu000500	15	0	0	0	0	6	0	9	0	0	0	0	0	0.009257	0	0.01653	0	Bacteria	Firmicutes	Clostridia	Clostridiales	Ruminococcaceae
Otu000524	15	0	0	10	2	0	3	0	0	0	0	0.01765	0.003252	0	0.005917	0	0	Bacteria	Proteobacteria	Alphaproteobacteria	Rhizobiales	Rhizobiaceae
Otu000839	15	6	0	3	1	3	1	0	1	0.010753	0	0.005295	0.001626	0.004628	0.001972	0	0.001896	Bacteria	Firmicutes	Bacilli	Lactobacillales	Lactobacillaceae	Lactobacillus
Otu000934	15	9	0	3	0	0	0	0	3	0.01613	0	0.005295	0	0	0	0	0.005688	Bacteria	Proteobacteria	Deltaproteobacteria	Desulfovibrionales	Desulfovibrionaceae
Otu000990	15	3	0	3	2	0	5	0	2	0.005377	0	0.005295	0.003252	0	0.009861	0	0.003792	Bacteria	Firmicutes	Bacilli	Lactobacillales	Lactobacillaceae	Lactobacillus
Otu001079	15	0	15	0	0	0	0	0	0	0	0.021397	0	0	0	0	0	0	Bacteria	Bacteroidetes	Bacteroidia	Bacteroidales
Otu001202	15	12	0	0	1	1	0	1	0	0.021507	0	0	0.001626	0.001543	0	0.001837	0	Bacteria	Firmicutes	Bacilli	Lactobacillales	Lactobacillaceae	Lactobacillus
Otu001356	15	5	0	4	2	0	4	0	0	0.008961	0	0.00706	0.003252	0	0.007889	0	0	Bacteria	Firmicutes	Bacilli	Lactobacillales	Lactobacillaceae	Lactobacillus	Lactobacillus_murinus
Otu001613	15	0	0	0	0	4	0	10	1	0	0	0	0	0.006171	0	0.018367	0.001896	Bacteria	Bacteroidetes	Bacteroidia	Bacteroidales	Muribaculaceae
Otu001672	15	3	1	4	6	0	1	0	0	0.005377	0.001426	0.00706	0.009757	0	0.001972	0	0	Bacteria	Firmicutes	Bacilli	Lactobacillales	Enterococcaceae	Enterococcus
Otu001835	15	0	14	0	0	0	0	0	1	0	0.019971	0	0	0	0	0	0.001896	Bacteria	Bacteroidetes	Bacteroidia	Bacteroidales	Muribaculaceae
Otu001963	15	0	0	0	0	7	5	2	1	0	0	0	0	0.010799	0.009861	0.003673	0.001896	Bacteria	Firmicutes	Clostridia	Clostridiales	Lachnospiraceae
Otu001981	15	15	0	0	0	0	0	0	0	0.026884	0	0	0	0	0	0	0	Bacteria	Proteobacteria	Alphaproteobacteria	Reyranellales	Reyranellaceae	Reyranella
Otu001993	15	15	0	0	0	0	0	0	0	0.026884	0	0	0	0	0	0	0	Bacteria	Proteobacteria	Gammaproteobacteria	Pseudomonadales	Pseudomonadaceae	Pseudomonas
Otu000145	14	1	2	1	1	4	0	0	5	0.001792	0.002853	0.001765	0.001626	0.006171	0	0	0.00948	Bacteria	Firmicutes	Clostridia	Clostridiales	Ruminococcaceae	Ruminococcaceae_UCG-014
Otu000275	14	0	0	0	11	1	2	0	0	0	0	0	0.017888	0.001543	0.003944	0	0	Bacteria	Firmicutes	Erysipelotrichia	Erysipelotrichales	Erysipelotrichaceae
Otu000389	14	1	0	0	0	12	0	1	0	0.001792	0	0	0	0.018513	0	0.001837	0	Bacteria	Firmicutes	Clostridia	Clostridiales	Ruminococcaceae	Harryflintia
Otu000498	14	0	1	0	1	5	1	5	1	0	0.001426	0	0.001626	0.007714	0.001972	0.009184	0.001896	Bacteria	Firmicutes	Clostridia	Clostridiales	Lachnospiraceae	Lachnospiraceae_NK4A136_group
Otu000530	14	0	14	0	0	0	0	0	0	0	0.019971	0	0	0	0	0	0	Bacteria	Verrucomicrobia	Verrucomicrobiae	Verrucomicrobiales	Akkermansiaceae	Akkermansia
Otu000670	14	1	0	2	11	0	0	0	0	0.001792	0	0.00353	0.017888	0	0	0	0	Bacteria	Cyanobacteria	Oxyphotobacteria	Chloroplast
Otu000686	14	2	1	0	0	6	0	4	1	0.003584	0.001426	0	0	0.009257	0	0.007347	0.001896	Bacteria	Firmicutes	Clostridia	Clostridiales	Ruminococcaceae	Ruminococcaceae_UCG-009
Otu000763	14	0	2	0	0	3	0	1	8	0	0.002853	0	0	0.004628	0	0.001837	0.015169	Bacteria	Bacteroidetes	Bacteroidia	Bacteroidales	Muribaculaceae
Otu001014	14	0	0	0	1	5	0	1	7	0	0	0	0.001626	0.007714	0	0.001837	0.013273	Bacteria	Bacteroidetes	Bacteroidia	Bacteroidales	Prevotellaceae
Otu001323	14	4	0	3	3	0	4	0	0	0.007169	0	0.005295	0.004879	0	0.007889	0	0	Bacteria	Firmicutes	Bacilli	Lactobacillales	Lactobacillaceae	Lactobacillus	Lactobacillus_murinus
Otu001423	14	3	0	4	2	0	4	0	1	0.005377	0	0.00706	0.003252	0	0.007889	0	0.001896	Bacteria	Firmicutes	Bacilli	Lactobacillales	Lactobacillaceae	Lactobacillus	Lactobacillus_murinus
Otu001464	14	3	0	4	4	0	3	0	0	0.005377	0	0.00706	0.006505	0	0.005917	0	0	Bacteria	Firmicutes	Bacilli	Lactobacillales	Lactobacillaceae	Lactobacillus	Lactobacillus_murinus
Otu001605	14	0	0	14	0	0	0	0	0	0	0	0.02471	0	0	0	0	0	Bacteria	Bacteroidetes	Bacteroidia	Bacteroidales	Muribaculaceae
Otu001757	14	3	0	4	1	0	5	0	1	0.005377	0	0.00706	0.001626	0	0.009861	0	0.001896	Bacteria	Firmicutes	Bacilli	Lactobacillales	Lactobacillaceae	Lactobacillus	Lactobacillus_murinus
Otu001792	14	5	0	3	6	0	0	0	0	0.008961	0	0.005295	0.009757	0	0	0	0	Bacteria	Firmicutes	Bacilli	Lactobacillales	Lactobacillaceae	Lactobacillus
Otu001966	14	5	0	0	9	0	0	0	0	0.008961	0	0	0.014636	0	0	0	0	Bacteria	Firmicutes	Bacilli	Lactobacillales	Lactobacillaceae	Lactobacillus
Otu002017	14	0	0	0	0	3	6	5	0	0	0	0	0	0.004628	0.011833	0.009184	0	Bacteria	Firmicutes	Clostridia	Clostridiales	Lachnospiraceae
Otu002068	14	14	0	0	0	0	0	0	0	0.025091	0	0	0	0	0	0	0	Bacteria	Proteobacteria	Alphaproteobacteria	Sphingomonadales	Sphingomonadaceae
Otu000104	13	1	3	0	4	3	0	1	1	0.001792	0.004279	0	0.006505	0.004628	0	0.001837	0.001896	Bacteria	Actinobacteria	Coriobacteriia	Coriobacteriales	Eggerthellaceae	Enterorhabdus
Otu000121	13	2	0	9	0	0	0	0	2	0.003584	0	0.015885	0	0	0	0	0.003792	Bacteria	Firmicutes	Clostridia	Clostridiales	Lachnospiraceae
Otu000212	13	2	0	0	2	6	1	1	1	0.003584	0	0	0.003252	0.009257	0.001972	0.001837	0.001896	Bacteria	Firmicutes	Clostridia	Clostridiales	Lachnospiraceae
Otu000317	13	2	0	0	10	0	0	0	1	0.003584	0	0	0.016262	0	0	0	0.001896	Bacteria	Firmicutes	Erysipelotrichia	Erysipelotrichales	Erysipelotrichaceae	Dubosiella
Otu000320	13	0	0	0	11	2	0	0	0	0	0	0	0.017888	0.003086	0	0	0	Bacteria	Firmicutes	Clostridia	Clostridiales	Lachnospiraceae	Marvinbryantia	Clostridiales_bacterium_CIEAF_012
Otu000348	13	2	0	7	3	0	1	0	0	0.003584	0	0.012355	0.004879	0	0.001972	0	0	Bacteria	Proteobacteria	Alphaproteobacteria	Rhizobiales	Rhizobiaceae	Ochrobactrum
Otu000355	13	0	5	0	8	0	0	0	0	0	0.007132	0	0.013009	0	0	0	0	Bacteria	Firmicutes	Clostridia	Clostridiales	Ruminococcaceae
Otu000485	13	0	0	9	4	0	0	0	0	0	0	0.015885	0.006505	0	0	0	0	Bacteria	Actinobacteria	Coriobacteriia	Coriobacteriales	Eggerthellaceae	Gordonibacter
Otu000906	13	0	0	0	0	2	0	4	7	0	0	0	0	0.003086	0	0.007347	0.013273	Bacteria	Bacteroidetes	Bacteroidia	Bacteroidales	Muribaculaceae
Otu000921	13	0	13	0	0	0	0	0	0	0	0.018544	0	0	0	0	0	0	Bacteria	Firmicutes	Clostridia	Clostridiales	Eubacteriaceae	Anaerofustis
Otu001382	13	0	0	0	0	1	0	0	12	0	0	0	0	0.001543	0	0	0.022753	Bacteria
Otu001406	13	7	0	1	1	3	0	1	0	0.012546	0	0.001765	0.001626	0.004628	0	0.001837	0	Bacteria	Firmicutes	Bacilli	Lactobacillales	Lactobacillaceae	Lactobacillus
Otu001570	13	4	0	3	4	0	2	0	0	0.007169	0	0.005295	0.006505	0	0.003944	0	0	Bacteria	Firmicutes	Bacilli	Lactobacillales	Lactobacillaceae	Lactobacillus	Lactobacillus_murinus
Otu001633	13	0	13	0	0	0	0	0	0	0	0.018544	0	0	0	0	0	0	Bacteria	Bacteroidetes	Bacteroidia	Bacteroidales	Muribaculaceae
Otu001710	13	4	0	7	2	0	0	0	0	0.007169	0	0.012355	0.003252	0	0	0	0	Bacteria	Cyanobacteria	Oxyphotobacteria	Chloroplast
Otu001780	13	0	0	0	0	6	7	0	0	0	0	0	0	0.009257	0.013805	0	0	Bacteria	Firmicutes	Clostridia	Clostridiales
Otu001816	13	0	8	0	0	1	1	0	3	0	0.011412	0	0	0.001543	0.001972	0	0.005688	Bacteria	Bacteroidetes	Bacteroidia	Bacteroidales	Tannerellaceae	Parabacteroides	Parabacteroides_goldsteinii
Otu001845	13	0	0	0	0	5	4	4	0	0	0	0	0	0.007714	0.007889	0.007347	0	Bacteria	Firmicutes	Clostridia	Clostridiales	Lachnospiraceae
Otu001974	13	13	0	0	0	0	0	0	0	0.023299	0	0	0	0	0	0	0	Bacteria	Proteobacteria	Alphaproteobacteria	Rhodospirillales	AEGEAN-169_marine_group
Otu002035	13	0	0	0	0	6	2	5	0	0	0	0	0	0.009257	0.003944	0.009184	0	Bacteria	Firmicutes	Clostridia	Clostridiales	Lachnospiraceae
Otu002072	13	13	0	0	0	0	0	0	0	0.023299	0	0	0	0	0	0	0	Bacteria	Proteobacteria	Gammaproteobacteria	Alteromonadales	Colwelliaceae	Thalassotalea
Otu002077	13	0	0	13	0	0	0	0	0	0	0	0.022945	0	0	0	0	0	Bacteria	Actinobacteria	Actinobacteria	Propionibacteriales	Nocardioidaceae
Otu002131	13	13	0	0	0	0	0	0	0	0.023299	0	0	0	0	0	0	0	Bacteria	Proteobacteria	Gammaproteobacteria	Methylococcales	Cycloclasticaceae	Cycloclasticus
Otu000161	12	12	0	0	0	0	0	0	0	0.021507	0	0	0	0	0	0	0	Bacteria	Bacteroidetes	Bacteroidia	Bacteroidales	Muribaculaceae
Otu000166	12	3	3	0	0	2	2	2	0	0.005377	0.004279	0	0	0.003086	0.003944	0.003673	0	Bacteria	Bacteroidetes	Bacteroidia	Bacteroidales	Muribaculaceae
Otu000245	12	3	0	2	0	1	1	0	5	0.005377	0	0.00353	0	0.001543	0.001972	0	0.00948	Bacteria	Firmicutes	Clostridia	Clostridiales	Ruminococcaceae	Ruminococcaceae_UCG-014
Otu000338	12	0	0	0	0	6	0	6	0	0	0	0	0	0.009257	0	0.01102	0	Bacteria	Firmicutes	Clostridia	Clostridiales	Lachnospiraceae
Otu000719	12	0	0	0	0	10	1	1	0	0	0	0	0	0.015428	0.001972	0.001837	0	Bacteria	Firmicutes	Clostridia	Clostridiales	Lachnospiraceae	Roseburia
Otu000771	12	0	0	2	1	1	5	3	0	0	0	0.00353	0.001626	0.001543	0.009861	0.00551	0	Bacteria	Firmicutes	Clostridia	Clostridiales	Lachnospiraceae
Otu000894	12	5	0	5	0	0	0	1	1	0.008961	0	0.008825	0	0	0	0.001837	0.001896	Bacteria	Proteobacteria	Gammaproteobacteria	Xanthomonadales	Xanthomonadaceae	Stenotrophomonas
Otu001101	12	0	0	0	0	10	1	1	0	0	0	0	0	0.015428	0.001972	0.001837	0	Bacteria	Bacteroidetes	Bacteroidia	Bacteroidales	Muribaculaceae
Otu001185	12	0	0	5	0	2	1	3	1	0	0	0.008825	0	0.003086	0.001972	0.00551	0.001896	Bacteria	Firmicutes	Bacilli	Lactobacillales	Lactobacillaceae	Lactobacillus
Otu001200	12	0	3	0	2	2	0	2	3	0	0.004279	0	0.003252	0.003086	0	0.003673	0.005688	Bacteria	Bacteroidetes	Bacteroidia	Bacteroidales	Muribaculaceae
Otu001229	12	5	0	1	0	2	1	3	0	0.008961	0	0.001765	0	0.003086	0.001972	0.00551	0	Bacteria	Firmicutes	Bacilli	Lactobacillales	Lactobacillaceae	Lactobacillus
Otu001240	12	0	0	7	5	0	0	0	0	0	0	0.012355	0.008131	0	0	0	0	Bacteria	Proteobacteria	Alphaproteobacteria	Rickettsiales	Mitochondria
Otu001252	12	0	0	0	0	2	0	1	9	0	0	0	0	0.003086	0	0.001837	0.017065	Bacteria	Bacteroidetes	Bacteroidia	Bacteroidales	Prevotellaceae
Otu001284	12	0	0	0	0	0	0	0	12	0	0	0	0	0	0	0	0.022753	Bacteria	Bacteroidetes	Bacteroidia	Bacteroidales	Bacteroidaceae	Bacteroides
Otu001474	12	3	0	3	2	0	3	0	1	0.005377	0	0.005295	0.003252	0	0.005917	0	0.001896	Bacteria	Firmicutes	Bacilli	Lactobacillales	Lactobacillaceae	Lactobacillus	Lactobacillus_murinus
Otu001820	12	0	0	0	0	3	0	6	3	0	0	0	0	0.004628	0	0.01102	0.005688	Bacteria	Bacteroidetes	Bacteroidia	Bacteroidales	Muribaculaceae
Otu001932	12	0	0	0	12	0	0	0	0	0	0	0	0.019514	0	0	0	0	Bacteria	Proteobacteria	Gammaproteobacteria	Enterobacteriales	Enterobacteriaceae
Otu002083	12	0	0	0	12	0	0	0	0	0	0	0	0.019514	0	0	0	0	Bacteria	Proteobacteria	Gammaproteobacteria	Betaproteobacteriales	Burkholderiaceae
Otu002105	12	3	0	4	5	0	0	0	0	0.005377	0	0.00706	0.008131	0	0	0	0	Bacteria	Firmicutes	Bacilli	Lactobacillales	Lactobacillaceae	Lactobacillus
Otu002140	12	0	0	12	0	0	0	0	0	0	0	0.02118	0	0	0	0	0	Bacteria	Actinobacteria	Actinobacteria	Pseudonocardiales	Pseudonocardiaceae	Saccharopolyspora
Otu002141	12	12	0	0	0	0	0	0	0	0.021507	0	0	0	0	0	0	0	Bacteria	Proteobacteria	Gammaproteobacteria	Betaproteobacteriales	Burkholderiaceae
Otu002143	12	0	12	0	0	0	0	0	0	0	0.017118	0	0	0	0	0	0	Bacteria
Otu002153	12	0	0	3	9	0	0	0	0	0	0	0.005295	0.014636	0	0	0	0	Bacteria	Firmicutes	Bacilli	Lactobacillales	Lactobacillaceae	Lactobacillus
Otu002170	12	12	0	0	0	0	0	0	0	0.021507	0	0	0	0	0	0	0	Bacteria	Proteobacteria	Alphaproteobacteria	Rhizobiales	Rhizobiaceae	Mesorhizobium
Otu002175	12	12	0	0	0	0	0	0	0	0.021507	0	0	0	0	0	0	0	Bacteria	Proteobacteria	Alphaproteobacteria
Otu000073	11	1	4	0	5	0	0	1	0	0.001792	0.005706	0	0.008131	0	0	0.001837	0	Bacteria	Firmicutes	Clostridia	Clostridiales	Lachnospiraceae	Lachnospiraceae_NK4A136_group
Otu000316	11	0	3	0	0	4	0	4	0	0	0.004279	0	0	0.006171	0	0.007347	0	Bacteria	Firmicutes	Clostridia	Clostridiales	Lachnospiraceae
Otu000334	11	0	0	0	11	0	0	0	0	0	0	0	0.017888	0	0	0	0	Bacteria	Firmicutes	Erysipelotrichia	Erysipelotrichales	Erysipelotrichaceae	Candidatus_Stoquefichus
Otu000420	11	0	7	0	0	2	1	1	0	0	0.009985	0	0	0.003086	0.001972	0.001837	0	Bacteria	Firmicutes	Clostridia	Clostridiales	Ruminococcaceae	Oscillibacter
Otu000532	11	0	0	0	0	4	1	3	3	0	0	0	0	0.006171	0.001972	0.00551	0.005688	Bacteria	Firmicutes	Clostridia	Clostridiales	Lachnospiraceae	Lachnoclostridium
Otu000635	11	11	0	0	0	0	0	0	0	0.019715	0	0	0	0	0	0	0	Bacteria	Proteobacteria	Alphaproteobacteria	Elsterales
Otu000689	11	9	0	0	1	1	0	0	0	0.01613	0	0	0.001626	0.001543	0	0	0	Bacteria	Proteobacteria	Alphaproteobacteria	Rhizobiales	Beijerinckiaceae	Methylobacterium
Otu000789	11	0	11	0	0	0	0	0	0	0	0.015691	0	0	0	0	0	0	Bacteria	Verrucomicrobia	Verrucomicrobiae	Verrucomicrobiales	Akkermansiaceae	Akkermansia
Otu000929	11	0	9	0	1	1	0	0	0	0	0.012838	0	0.001626	0.001543	0	0	0	Bacteria	Verrucomicrobia	Verrucomicrobiae	Verrucomicrobiales	Akkermansiaceae	Akkermansia	Akkermansia_muciniphila
Otu001089	11	0	9	0	1	0	0	1	0	0	0.012838	0	0.001626	0	0	0.001837	0	Bacteria	Verrucomicrobia	Verrucomicrobiae	Verrucomicrobiales	Akkermansiaceae	Akkermansia	Akkermansia_muciniphila
Otu001114	11	0	0	0	0	2	0	2	7	0	0	0	0	0.003086	0	0.003673	0.013273	Bacteria	Bacteroidetes	Bacteroidia	Bacteroidales	Prevotellaceae
Otu001264	11	0	0	0	0	5	4	2	0	0	0	0	0	0.007714	0.007889	0.003673	0	Bacteria	Firmicutes	Clostridia	Clostridiales	Lachnospiraceae
Otu001386	11	0	10	0	1	0	0	0	0	0	0.014265	0	0.001626	0	0	0	0	Bacteria	Verrucomicrobia	Verrucomicrobiae	Verrucomicrobiales	Akkermansiaceae	Akkermansia
Otu001426	11	0	0	0	0	0	0	1	10	0	0	0	0	0	0	0.001837	0.018961	Bacteria	Bacteroidetes	Bacteroidia	Bacteroidales	Prevotellaceae	Alloprevotella
Otu001467	11	0	0	0	0	6	3	1	1	0	0	0	0	0.009257	0.005917	0.001837	0.001896	Bacteria	Firmicutes	Clostridia	Clostridiales	Lachnospiraceae	Lachnoclostridium
Otu001512	11	0	0	0	0	0	0	0	11	0	0	0	0	0	0	0	0.020857	Bacteria	Bacteroidetes	Bacteroidia	Bacteroidales
Otu001657	11	4	0	6	1	0	0	0	0	0.007169	0	0.01059	0.001626	0	0	0	0	Bacteria	Firmicutes	Bacilli	Lactobacillales	Lactobacillaceae	Lactobacillus
Otu001690	11	3	0	4	3	0	1	0	0	0.005377	0	0.00706	0.004879	0	0.001972	0	0	Bacteria	Firmicutes	Bacilli	Lactobacillales	Lactobacillaceae	Lactobacillus	Lactobacillus_murinus
Otu001723	11	0	1	0	0	4	0	4	2	0	0.001426	0	0	0.006171	0	0.007347	0.003792	Bacteria	Bacteroidetes	Bacteroidia	Bacteroidales	Muribaculaceae
Otu001803	11	6	0	0	5	0	0	0	0	0.010753	0	0	0.008131	0	0	0	0	Bacteria	Firmicutes	Bacilli	Lactobacillales	Lactobacillaceae	Lactobacillus
Otu002103	11	0	0	4	6	1	0	0	0	0	0	0.00706	0.009757	0.001543	0	0	0	Bacteria	Firmicutes	Bacilli	Lactobacillales	Lactobacillaceae	Lactobacillus
Otu002104	11	0	0	2	9	0	0	0	0	0	0	0.00353	0.014636	0	0	0	0	Bacteria	Proteobacteria	Alphaproteobacteria	Sphingomonadales	Sphingomonadaceae
Otu002221	11	11	0	0	0	0	0	0	0	0.019715	0	0	0	0	0	0	0	Bacteria	Proteobacteria	Alphaproteobacteria	Rhizobiales	Xanthobacteraceae
Otu002259	11	0	0	0	11	0	0	0	0	0	0	0	0.017888	0	0	0	0	Bacteria	Chloroflexi	Chloroflexia	Kallotenuales	AKIW781
Otu002281	11	0	0	11	0	0	0	0	0	0	0	0.019415	0	0	0	0	0	Bacteria	Actinobacteria	Acidimicrobiia	IMCC26256
Otu002283	11	11	0	0	0	0	0	0	0	0.019715	0	0	0	0	0	0	0	Bacteria	Firmicutes	Bacilli	Bacillales	Bacillaceae
Otu002285	11	11	0	0	0	0	0	0	0	0.019715	0	0	0	0	0	0	0	Bacteria	Bacteroidetes	Bacteroidia	Chitinophagales	Chitinophagaceae
Otu002288	11	11	0	0	0	0	0	0	0	0.019715	0	0	0	0	0	0	0	Bacteria
Otu002311	11	0	0	11	0	0	0	0	0	0	0	0.019415	0	0	0	0	0	Bacteria	Proteobacteria	Deltaproteobacteria	Myxococcales	Archangiaceae	Anaeromyxobacter
Otu000103	10	0	0	0	0	4	3	1	2	0	0	0	0	0.006171	0.005917	0.001837	0.003792	Bacteria	Proteobacteria	Gammaproteobacteria	Pasteurellales	Pasteurellaceae	Rodentibacter
Otu000147	10	1	1	1	2	0	0	1	4	0.001792	0.001426	0.001765	0.003252	0	0	0.001837	0.007584	Bacteria	Firmicutes	Clostridia	Clostridiales	Lachnospiraceae	ASF356
Otu000195	10	0	1	0	0	2	1	0	6	0	0.001426	0	0	0.003086	0.001972	0	0.011377	Bacteria	Bacteroidetes	Bacteroidia	Bacteroidales	Muribaculaceae
Otu000248	10	4	4	0	0	2	0	0	0	0.007169	0.005706	0	0	0.003086	0	0	0	Bacteria	Firmicutes	Clostridia	Clostridiales	Family_XIII	Family_XIII_AD3011_group
Otu000254	10	0	0	1	0	1	1	0	7	0	0	0.001765	0	0.001543	0.001972	0	0.013273	Bacteria	Actinobacteria	Coriobacteriia	Coriobacteriales	Eggerthellaceae	Parvibacter
Otu000344	10	0	4	0	3	1	0	1	1	0	0.005706	0	0.004879	0.001543	0	0.001837	0.001896	Bacteria	Firmicutes	Clostridia	Clostridiales	Ruminococcaceae
Otu000366	10	2	0	1	0	3	0	4	0	0.003584	0	0.001765	0	0.004628	0	0.007347	0	Bacteria	Firmicutes	Bacilli	Bacillales	Planococcaceae	Sporosarcina
Otu000588	10	0	10	0	0	0	0	0	0	0	0.014265	0	0	0	0	0	0	Bacteria	Verrucomicrobia	Verrucomicrobiae	Verrucomicrobiales	Akkermansiaceae	Akkermansia	Akkermansia_muciniphila
Otu000698	10	0	0	0	10	0	0	0	0	0	0	0	0.016262	0	0	0	0	Bacteria	Proteobacteria	Gammaproteobacteria	Oceanospirillales	Halomonadaceae	Halomonas
Otu000702	10	0	4	0	0	1	2	2	1	0	0.005706	0	0	0.001543	0.003944	0.003673	0.001896	Bacteria	Firmicutes	Clostridia	Clostridiales	Ruminococcaceae	Ruminiclostridium_9
Otu000790	10	0	0	0	0	0	0	0	10	0	0	0	0	0	0	0	0.018961	Bacteria	Bacteroidetes	Bacteroidia	Bacteroidales
Otu000821	10	0	0	0	1	1	0	5	3	0	0	0	0.001626	0.001543	0	0.009184	0.005688	Bacteria	Bacteroidetes	Bacteroidia	Bacteroidales	Muribaculaceae
Otu000865	10	0	8	1	1	0	0	0	0	0	0.011412	0.001765	0.001626	0	0	0	0	Bacteria	Verrucomicrobia	Verrucomicrobiae	Verrucomicrobiales	Akkermansiaceae	Akkermansia	Akkermansia_muciniphila
Otu000886	10	0	8	1	0	0	0	0	1	0	0.011412	0.001765	0	0	0	0	0.001896	Bacteria	Verrucomicrobia	Verrucomicrobiae	Verrucomicrobiales	Akkermansiaceae	Akkermansia
Otu000942	10	0	8	0	1	0	0	1	0	0	0.011412	0	0.001626	0	0	0.001837	0	Bacteria	Verrucomicrobia	Verrucomicrobiae	Verrucomicrobiales	Akkermansiaceae	Akkermansia
Otu001073	10	0	0	2	0	3	0	5	0	0	0	0.00353	0	0.004628	0	0.009184	0	Bacteria	Firmicutes	Clostridia	Clostridiales	Christensenellaceae	Christensenellaceae_R-7_group
Otu001355	10	2	0	8	0	0	0	0	0	0.003584	0	0.01412	0	0	0	0	0	Bacteria	Bacteroidetes	Bacteroidia	Chitinophagales	Chitinophagaceae	Sediminibacterium
Otu001384	10	0	0	2	0	1	4	2	1	0	0	0.00353	0	0.001543	0.007889	0.003673	0.001896	Bacteria	Firmicutes	Bacilli	Lactobacillales	Lactobacillaceae	Lactobacillus
Otu001473	10	0	0	0	2	3	5	0	0	0	0	0	0.003252	0.004628	0.009861	0	0	Bacteria	Firmicutes	Clostridia	Clostridiales	Lachnospiraceae
Otu001546	10	6	0	1	0	1	0	2	0	0.010753	0	0.001765	0	0.001543	0	0.003673	0	Bacteria	Firmicutes	Bacilli	Lactobacillales	Lactobacillaceae	Lactobacillus
Otu001629	10	7	0	0	0	1	0	2	0	0.012546	0	0	0	0.001543	0	0.003673	0	Bacteria	Firmicutes	Bacilli	Lactobacillales	Lactobacillaceae	Lactobacillus
Otu001874	10	0	0	10	0	0	0	0	0	0	0	0.01765	0	0	0	0	0	Bacteria	Actinobacteria	Coriobacteriia	Coriobacteriales	Eggerthellaceae	Enterorhabdus
Otu001930	10	5	0	1	0	1	0	3	0	0.008961	0	0.001765	0	0.001543	0	0.00551	0	Bacteria	Firmicutes	Bacilli	Lactobacillales	Lactobacillaceae	Lactobacillus
Otu001954	10	0	0	0	0	4	0	3	3	0	0	0	0	0.006171	0	0.00551	0.005688	Bacteria	Bacteroidetes	Bacteroidia	Bacteroidales	Muribaculaceae
Otu002227	10	4	0	1	5	0	0	0	0	0.007169	0	0.001765	0.008131	0	0	0	0	Bacteria	Firmicutes	Bacilli	Lactobacillales	Lactobacillaceae	Lactobacillus	Lactobacillus_gasseri
Otu002252	10	0	0	0	10	0	0	0	0	0	0	0	0.016262	0	0	0	0	Bacteria	Firmicutes	Bacilli	Bacillales	Family_XII	Exiguobacterium	Exiguobacterium_indicum
Otu002315	10	0	0	0	0	6	4	0	0	0	0	0	0	0.009257	0.007889	0	0	Bacteria	Firmicutes	Clostridia	Clostridiales	Lachnospiraceae
Otu002324	10	10	0	0	0	0	0	0	0	0.017922	0	0	0	0	0	0	0	Bacteria	Firmicutes	Clostridia	Clostridiales
Otu002358	10	10	0	0	0	0	0	0	0	0.017922	0	0	0	0	0	0	0	Bacteria	Tenericutes	Mollicutes	Mycoplasmatales	Mycoplasmataceae	Candidatus_Bacilloplasma
Otu002362	10	10	0	0	0	0	0	0	0	0.017922	0	0	0	0	0	0	0	Bacteria	Proteobacteria	Alphaproteobacteria	Rhodospirillales	Magnetospirillaceae	Magnetospirillum
Otu002368	10	0	0	0	10	0	0	0	0	0	0	0	0.016262	0	0	0	0	Bacteria	Proteobacteria	Gammaproteobacteria	Xanthomonadales	Xanthomonadaceae	Lysobacter
Otu002383	10	10	0	0	0	0	0	0	0	0.017922	0	0	0	0	0	0	0	Bacteria	Acidobacteria	Acidobacteriia	Solibacterales	Solibacteraceae_Subgroup_3	Candidatus_Solibacter
Otu000136	9	0	3	1	4	0	1	0	0	0	0.004279	0.001765	0.006505	0	0.001972	0	0	Bacteria	Firmicutes	Clostridia	Clostridiales	Lachnospiraceae
Otu000215	9	0	1	0	1	0	2	0	5	0	0.001426	0	0.001626	0	0.003944	0	0.00948	Bacteria	Bacteroidetes	Bacteroidia	Bacteroidales	Muribaculaceae
Otu000331	9	0	0	0	9	0	0	0	0	0	0	0	0.014636	0	0	0	0	Bacteria	Firmicutes	Erysipelotrichia	Erysipelotrichales	Erysipelotrichaceae	Dubosiella
Otu000435	9	0	7	0	0	0	0	1	1	0	0.009985	0	0	0	0	0.001837	0.001896	Bacteria	Bacteroidetes	Bacteroidia	Bacteroidales	Muribaculaceae
Otu000441	9	0	1	0	0	2	0	1	5	0	0.001426	0	0	0.003086	0	0.001837	0.00948	Bacteria	Firmicutes	Clostridia	Clostridiales	Clostridiales_vadinBB60_group
Otu000656	9	0	0	1	0	3	0	4	1	0	0	0.001765	0	0.004628	0	0.007347	0.001896	Bacteria	Firmicutes	Clostridia	Clostridiales	Lachnospiraceae
Otu000683	9	0	0	0	0	4	0	3	2	0	0	0	0	0.006171	0	0.00551	0.003792	Bacteria	Firmicutes	Erysipelotrichia	Erysipelotrichales	Erysipelotrichaceae	Dubosiella
Otu000755	9	0	7	0	0	0	0	1	1	0	0.009985	0	0	0	0	0.001837	0.001896	Bacteria	Verrucomicrobia	Verrucomicrobiae	Verrucomicrobiales	Akkermansiaceae	Akkermansia	Akkermansia_muciniphila
Otu000787	9	0	0	0	0	4	0	0	5	0	0	0	0	0.006171	0	0	0.00948	Bacteria	Bacteroidetes	Bacteroidia	Bacteroidales	Muribaculaceae
Otu001033	9	4	0	4	1	0	0	0	0	0.007169	0	0.00706	0.001626	0	0	0	0	Bacteria	Firmicutes	Bacilli	Lactobacillales	Leuconostocaceae	Weissella
Otu001232	9	0	1	0	0	1	7	0	0	0	0.001426	0	0	0.001543	0.013805	0	0	Bacteria	Firmicutes	Clostridia	Clostridiales	Ruminococcaceae	Harryflintia
Otu001439	9	6	0	1	0	2	0	0	0	0.010753	0	0.001765	0	0.003086	0	0	0	Bacteria	Proteobacteria	Alphaproteobacteria	Sphingomonadales	Sphingomonadaceae	Sphingomonas
Otu001462	9	0	0	0	0	2	3	3	1	0	0	0	0	0.003086	0.005917	0.00551	0.001896	Bacteria	Bacteroidetes	Bacteroidia	Bacteroidales	Muribaculaceae
Otu001517	9	0	0	0	0	1	1	0	7	0	0	0	0	0.001543	0.001972	0	0.013273	Bacteria	Bacteroidetes	Bacteroidia	Bacteroidales	Prevotellaceae
Otu001679	9	3	0	1	3	0	2	0	0	0.005377	0	0.001765	0.004879	0	0.003944	0	0	Bacteria	Firmicutes	Bacilli	Lactobacillales	Lactobacillaceae	Lactobacillus	Lactobacillus_murinus
Otu001830	9	0	0	0	0	3	1	2	3	0	0	0	0	0.004628	0.001972	0.003673	0.005688	Bacteria	Actinobacteria	Coriobacteriia	Coriobacteriales	Eggerthellaceae	Enterorhabdus	Enterorhabdus_caecimuris_B7
Otu001849	9	0	0	0	0	4	0	1	4	0	0	0	0	0.006171	0	0.001837	0.007584	Bacteria	Bacteroidetes	Bacteroidia	Bacteroidales	Prevotellaceae	Alloprevotella
Otu001951	9	0	0	3	1	0	5	0	0	0	0	0.005295	0.001626	0	0.009861	0	0	Bacteria	Firmicutes	Bacilli	Lactobacillales	Lactobacillaceae	Lactobacillus	Lactobacillus_murinus
Otu002192	9	3	0	3	3	0	0	0	0	0.005377	0	0.005295	0.004879	0	0	0	0	Bacteria	Firmicutes	Bacilli	Lactobacillales	Lactobacillaceae	Lactobacillus	Lactobacillus_murinus
Otu002223	9	0	0	9	0	0	0	0	0	0	0	0.015885	0	0	0	0	0	Bacteria	Cyanobacteria	Melainabacteria	Obscuribacterales
Otu002256	9	0	0	8	1	0	0	0	0	0	0	0.01412	0.001626	0	0	0	0	Bacteria	Cyanobacteria	Oxyphotobacteria	Chloroplast
Otu002334	9	0	0	0	0	1	3	5	0	0	0	0	0	0.001543	0.005917	0.009184	0	Bacteria	Firmicutes	Clostridia	Clostridiales	Lachnospiraceae
Otu002456	9	9	0	0	0	0	0	0	0	0.01613	0	0	0	0	0	0	0	Bacteria	Bacteroidetes	Bacteroidia	Bacteroidales	Muribaculaceae
Otu002474	9	0	0	0	9	0	0	0	0	0	0	0	0.014636	0	0	0	0	Bacteria	Firmicutes	Bacilli	Bacillales	Bacillaceae	Ureibacillus
Otu002527	9	7	0	0	0	0	0	2	0	0.012546	0	0	0	0	0	0.003673	0	Bacteria	Proteobacteria	Gammaproteobacteria	Betaproteobacteriales	Burkholderiaceae
Otu002530	9	9	0	0	0	0	0	0	0	0.01613	0	0	0	0	0	0	0	Bacteria	Acidobacteria	Thermoanaerobaculia	Thermoanaerobaculales	Thermoanaerobaculaceae	Subgroup_10
Otu000094	8	5	2	0	1	0	0	0	0	0.008961	0.002853	0	0.001626	0	0	0	0	Bacteria	Firmicutes	Clostridia	Clostridiales	Lachnospiraceae	Blautia
Otu000125	8	2	1	0	5	0	0	0	0	0.003584	0.001426	0	0.008131	0	0	0	0	Bacteria	Firmicutes	Clostridia	Clostridiales	Ruminococcaceae	Ruminiclostridium_6
Otu000160	8	0	1	0	1	0	0	0	6	0	0.001426	0	0.001626	0	0	0	0.011377	Bacteria	Firmicutes	Clostridia	Clostridiales	Lachnospiraceae	Lachnospiraceae_NK4A136_group
Otu000310	8	0	1	0	6	0	0	0	1	0	0.001426	0	0.009757	0	0	0	0.001896	Bacteria	Bacteroidetes	Bacteroidia	Bacteroidales
Otu000384	8	0	6	0	1	0	0	0	1	0	0.008559	0	0.001626	0	0	0	0.001896	Bacteria	Bacteroidetes	Bacteroidia	Bacteroidales	Muribaculaceae
Otu000450	8	0	0	0	0	4	4	0	0	0	0	0	0	0.006171	0.007889	0	0	Bacteria	Firmicutes	Clostridia	Clostridiales	Lachnospiraceae
Otu000457	8	0	1	0	7	0	0	0	0	0	0.001426	0	0.011383	0	0	0	0	Bacteria	Firmicutes	Clostridia	Clostridiales	Clostridiales_vadinBB60_group
Otu000458	8	0	8	0	0	0	0	0	0	0	0.011412	0	0	0	0	0	0	Bacteria	Bacteroidetes	Bacteroidia	Bacteroidales	Muribaculaceae
Otu000556	8	0	0	3	5	0	0	0	0	0	0	0.005295	0.008131	0	0	0	0	Bacteria	Firmicutes	Erysipelotrichia	Erysipelotrichales	Erysipelotrichaceae	Dubosiella
Otu000736	8	0	5	0	1	0	2	0	0	0	0.007132	0	0.001626	0	0.003944	0	0	Bacteria	Bacteroidetes	Bacteroidia	Bacteroidales	Muribaculaceae
Otu000832	8	0	6	0	0	0	0	2	0	0	0.008559	0	0	0	0	0.003673	0	Bacteria	Bacteroidetes	Bacteroidia	Bacteroidales	Muribaculaceae
Otu000861	8	0	8	0	0	0	0	0	0	0	0.011412	0	0	0	0	0	0	Bacteria	Firmicutes	Clostridia	Clostridiales	Ruminococcaceae	UBA1819
Otu000866	8	0	7	0	1	0	0	0	0	0	0.009985	0	0.001626	0	0	0	0	Bacteria	Verrucomicrobia	Verrucomicrobiae	Verrucomicrobiales	Akkermansiaceae	Akkermansia	Akkermansia_muciniphila
Otu000920	8	0	6	1	1	0	0	0	0	0	0.008559	0.001765	0.001626	0	0	0	0	Bacteria	Verrucomicrobia	Verrucomicrobiae	Verrucomicrobiales	Akkermansiaceae	Akkermansia	Akkermansia_muciniphila
Otu000961	8	0	0	0	0	5	0	3	0	0	0	0	0	0.007714	0	0.00551	0	Bacteria	Firmicutes	Clostridia	Clostridiales	Lachnospiraceae
Otu000981	8	0	5	0	0	0	0	0	3	0	0.007132	0	0	0	0	0	0.005688	Bacteria	Bacteroidetes	Bacteroidia	Bacteroidales	Bacteroidaceae	Bacteroides	Bacteroides_acidifaciens
Otu001022	8	0	8	0	0	0	0	0	0	0	0.011412	0	0	0	0	0	0	Bacteria	Verrucomicrobia	Verrucomicrobiae	Verrucomicrobiales	Akkermansiaceae	Akkermansia
Otu001111	8	0	7	0	0	0	0	1	0	0	0.009985	0	0	0	0	0.001837	0	Bacteria	Bacteroidetes	Bacteroidia	Bacteroidales	Muribaculaceae
Otu001487	8	0	8	0	0	0	0	0	0	0	0.011412	0	0	0	0	0	0	Bacteria	Firmicutes	Clostridia	Clostridiales	Clostridiales_vadinBB60_group
Otu001536	8	1	0	0	0	1	4	2	0	0.001792	0	0	0	0.001543	0.007889	0.003673	0	Bacteria	Firmicutes	Clostridia	Clostridiales	Lachnospiraceae
Otu001555	8	0	0	0	0	1	0	0	7	0	0	0	0	0.001543	0	0	0.013273	Bacteria	Bacteroidetes	Bacteroidia	Bacteroidales	Muribaculaceae
Otu001606	8	0	0	0	0	3	0	3	2	0	0	0	0	0.004628	0	0.00551	0.003792	Bacteria	Bacteroidetes	Bacteroidia	Bacteroidales	Muribaculaceae
Otu001651	8	3	0	0	1	0	0	3	1	0.005377	0	0	0.001626	0	0	0.00551	0.001896	Bacteria	Firmicutes	Bacilli	Lactobacillales	Lactobacillaceae	Lactobacillus
Otu001665	8	4	0	2	0	0	1	1	0	0.007169	0	0.00353	0	0	0.001972	0.001837	0	Bacteria	Firmicutes	Bacilli	Lactobacillales	Lactobacillaceae	Lactobacillus	Lactobacillus_murinus
Otu001685	8	0	0	0	1	2	1	3	1	0	0	0	0.001626	0.003086	0.001972	0.00551	0.001896	Bacteria
Otu001736	8	0	0	0	0	0	1	0	7	0	0	0	0	0	0.001972	0	0.013273	Bacteria	Bacteroidetes	Bacteroidia	Bacteroidales	Prevotellaceae
Otu001789	8	2	0	2	2	0	2	0	0	0.003584	0	0.00353	0.003252	0	0.003944	0	0	Bacteria	Firmicutes	Bacilli	Lactobacillales	Lactobacillaceae	Lactobacillus	Lactobacillus_murinus
Otu001796	8	0	8	0	0	0	0	0	0	0	0.011412	0	0	0	0	0	0	Bacteria	Bacteroidetes	Bacteroidia	Bacteroidales	Bacteroidaceae	Bacteroides
Otu002024	8	1	0	4	1	0	2	0	0	0.001792	0	0.00706	0.001626	0	0.003944	0	0	Bacteria	Firmicutes	Bacilli	Lactobacillales	Lactobacillaceae	Lactobacillus	Lactobacillus_murinus
Otu002075	8	0	0	0	0	0	8	0	0	0	0	0	0	0	0.015778	0	0	Bacteria	Firmicutes	Bacilli	Lactobacillales	Lactobacillaceae	Lactobacillus
Otu002085	8	3	0	1	1	0	3	0	0	0.005377	0	0.001765	0.001626	0	0.005917	0	0	Bacteria	Firmicutes	Bacilli	Lactobacillales	Lactobacillaceae	Lactobacillus
Otu002092	8	4	0	3	1	0	0	0	0	0.007169	0	0.005295	0.001626	0	0	0	0	Bacteria	Firmicutes	Bacilli	Lactobacillales	Lactobacillaceae	Lactobacillus	Lactobacillus_murinus
Otu002137	8	1	0	7	0	0	0	0	0	0.001792	0	0.012355	0	0	0	0	0	Bacteria	Firmicutes	Bacilli	Lactobacillales	Lactobacillaceae	Lactobacillus	Lactobacillus_murinus
Otu002249	8	0	8	0	0	0	0	0	0	0	0.011412	0	0	0	0	0	0	Bacteria	Bacteroidetes	Bacteroidia	Bacteroidales
Otu002263	8	2	1	1	3	0	1	0	0	0.003584	0.001426	0.001765	0.004879	0	0.001972	0	0	Bacteria	Firmicutes	Bacilli	Lactobacillales	Lactobacillaceae	Lactobacillus	Lactobacillus_murinus
Otu002290	8	0	0	0	0	6	2	0	0	0	0	0	0	0.009257	0.003944	0	0	Bacteria	Firmicutes	Clostridia	Clostridiales	Lachnospiraceae
Otu002314	8	1	0	2	5	0	0	0	0	0.001792	0	0.00353	0.008131	0	0	0	0	Bacteria	Firmicutes	Bacilli	Lactobacillales	Lactobacillaceae	Lactobacillus
Otu002464	8	8	0	0	0	0	0	0	0	0.014338	0	0	0	0	0	0	0	Bacteria	Verrucomicrobia	Verrucomicrobiae	Pedosphaerales	Pedosphaeraceae	SCGC_AAA164-E04	Verrucomicrobia_bacterium_SCGC_AAA164-E04
Otu002564	8	0	0	5	2	0	1	0	0	0	0	0.008825	0.003252	0	0.001972	0	0	Bacteria	Firmicutes	Bacilli	Lactobacillales	Lactobacillaceae	Lactobacillus	Lactobacillus_murinus
Otu002582	8	8	0	0	0	0	0	0	0	0.014338	0	0	0	0	0	0	0	Bacteria	Firmicutes	Clostridia	Clostridiales	Lachnospiraceae
Otu002592	8	8	0	0	0	0	0	0	0	0.014338	0	0	0	0	0	0	0	Bacteria	Proteobacteria	Gammaproteobacteria	Pseudomonadales	Pseudomonadaceae	Pseudomonas
Otu002667	8	8	0	0	0	0	0	0	0	0.014338	0	0	0	0	0	0	0	Bacteria	Proteobacteria	Alphaproteobacteria	Rhizobiales	Rhizobiaceae	Aureimonas
Otu000149	7	0	0	0	7	0	0	0	0	0	0	0	0.011383	0	0	0	0	Bacteria	Bacteroidetes	Bacteroidia	Bacteroidales	Bacteroidaceae	Bacteroides	Bacteroides_acidifaciens
Otu000153	7	0	0	1	6	0	0	0	0	0	0	0.001765	0.009757	0	0	0	0	Bacteria	Actinobacteria	Coriobacteriia	Coriobacteriales	Eggerthellaceae	Enterorhabdus
Otu000163	7	2	1	0	0	1	0	0	3	0.003584	0.001426	0	0	0.001543	0	0	0.005688	Bacteria	Firmicutes	Clostridia	Clostridiales	Lachnospiraceae
Otu000173	7	0	0	0	7	0	0	0	0	0	0	0	0.011383	0	0	0	0	Bacteria	Firmicutes	Clostridia	Clostridiales	Ruminococcaceae	Ruminococcaceae_UCG-014
Otu000177	7	0	2	1	0	0	0	1	3	0	0.002853	0.001765	0	0	0	0.001837	0.005688	Bacteria	Firmicutes	Clostridia	Clostridiales	Ruminococcaceae	Ruminococcaceae_UCG-014
Otu000183	7	0	2	0	2	1	1	1	0	0	0.002853	0	0.003252	0.001543	0.001972	0.001837	0	Bacteria	Firmicutes	Clostridia	Clostridiales	Lachnospiraceae
Otu000185	7	0	0	1	1	2	0	1	2	0	0	0.001765	0.001626	0.003086	0	0.001837	0.003792	Bacteria	Actinobacteria	Coriobacteriia	Coriobacteriales	Eggerthellaceae	Enterorhabdus
Otu000216	7	2	3	0	2	0	0	0	0	0.003584	0.004279	0	0.003252	0	0	0	0	Bacteria	Firmicutes	Clostridia	Clostridiales	Lachnospiraceae
Otu000262	7	0	2	2	3	0	0	0	0	0	0.002853	0.00353	0.004879	0	0	0	0	Bacteria	Firmicutes	Clostridia	Clostridiales	Lachnospiraceae
Otu000313	7	0	0	0	5	0	0	1	1	0	0	0	0.008131	0	0	0.001837	0.001896	Bacteria	Actinobacteria	Coriobacteriia	Coriobacteriales	Atopobiaceae
Otu000315	7	0	0	0	7	0	0	0	0	0	0	0	0.011383	0	0	0	0	Bacteria	Bacteroidetes	Bacteroidia	Bacteroidales	Muribaculaceae
Otu000369	7	0	5	0	0	2	0	0	0	0	0.007132	0	0	0.003086	0	0	0	Bacteria	Bacteroidetes	Bacteroidia	Bacteroidales	Muribaculaceae
Otu000400	7	0	2	0	1	0	0	1	3	0	0.002853	0	0.001626	0	0	0.001837	0.005688	Bacteria	Bacteroidetes	Bacteroidia	Bacteroidales	Muribaculaceae
Otu000442	7	0	0	0	7	0	0	0	0	0	0	0	0.011383	0	0	0	0	Bacteria	Actinobacteria	Coriobacteriia	Coriobacteriales	Eggerthellaceae
Otu000462	7	0	0	0	1	2	0	1	3	0	0	0	0.001626	0.003086	0	0.001837	0.005688	Bacteria	Firmicutes	Erysipelotrichia	Erysipelotrichales	Erysipelotrichaceae	Dubosiella
Otu000466	7	0	7	0	0	0	0	0	0	0	0.009985	0	0	0	0	0	0	Bacteria	Firmicutes	Clostridia	Clostridiales	Ruminococcaceae
Otu000487	7	0	0	0	0	1	4	2	0	0	0	0	0	0.001543	0.007889	0.003673	0	Bacteria	Firmicutes	Clostridia	Clostridiales	Lachnospiraceae
Otu000602	7	0	6	0	0	0	1	0	0	0	0.008559	0	0	0	0.001972	0	0	Bacteria	Bacteroidetes	Bacteroidia	Bacteroidales	Muribaculaceae
Otu000622	7	0	0	0	7	0	0	0	0	0	0	0	0.011383	0	0	0	0	Bacteria	Firmicutes	Erysipelotrichia	Erysipelotrichales	Erysipelotrichaceae	Dubosiella
Otu000623	7	0	4	0	1	1	0	0	1	0	0.005706	0	0.001626	0.001543	0	0	0.001896	Bacteria	Bacteroidetes	Bacteroidia	Bacteroidales	Muribaculaceae
Otu000696	7	0	0	0	0	5	0	2	0	0	0	0	0	0.007714	0	0.003673	0	Bacteria	Firmicutes	Clostridia	Clostridiales	Lachnospiraceae
Otu000813	7	0	1	0	2	1	0	3	0	0	0.001426	0	0.003252	0.001543	0	0.00551	0	Bacteria	Bacteroidetes	Bacteroidia	Bacteroidales	Muribaculaceae
Otu000842	7	1	5	0	1	0	0	0	0	0.001792	0.007132	0	0.001626	0	0	0	0	Bacteria	Verrucomicrobia	Verrucomicrobiae	Verrucomicrobiales	Akkermansiaceae	Akkermansia	Akkermansia_muciniphila
Otu000876	7	0	1	0	0	2	0	0	4	0	0.001426	0	0	0.003086	0	0	0.007584	Bacteria	Bacteroidetes	Bacteroidia	Bacteroidales	Muribaculaceae
Otu000901	7	0	6	0	0	1	0	0	0	0	0.008559	0	0	0.001543	0	0	0	Bacteria	Verrucomicrobia	Verrucomicrobiae	Verrucomicrobiales	Akkermansiaceae	Akkermansia	Akkermansia_muciniphila
Otu001012	7	0	7	0	0	0	0	0	0	0	0.009985	0	0	0	0	0	0	Bacteria	Bacteroidetes	Bacteroidia	Bacteroidales	Muribaculaceae
Otu001610	7	0	1	0	0	1	0	0	5	0	0.001426	0	0	0.001543	0	0	0.00948	Bacteria	Bacteroidetes	Bacteroidia	Bacteroidales	Muribaculaceae
Otu001701	7	0	0	0	1	1	0	2	3	0	0	0	0.001626	0.001543	0	0.003673	0.005688	Bacteria	Bacteroidetes	Bacteroidia	Bacteroidales	Muribaculaceae
Otu001838	7	0	0	0	0	2	0	1	4	0	0	0	0	0.003086	0	0.001837	0.007584	Bacteria	Bacteroidetes	Bacteroidia	Bacteroidales	Prevotellaceae	Alloprevotella
Otu001877	7	6	0	0	0	1	0	0	0	0.010753	0	0	0	0.001543	0	0	0	Bacteria	Firmicutes	Bacilli	Lactobacillales	Lactobacillaceae	Lactobacillus	Lactobacillus_gasseri
Otu001983	7	0	2	0	0	2	0	3	0	0	0.002853	0	0	0.003086	0	0.00551	0	Bacteria	Bacteroidetes	Bacteroidia	Bacteroidales	Muribaculaceae
Otu002032	7	0	0	0	7	0	0	0	0	0	0	0	0.011383	0	0	0	0	Bacteria	Proteobacteria	Gammaproteobacteria	Betaproteobacteriales	Burkholderiaceae	Comamonas	Comamonas_testosteroni
Otu002046	7	0	1	0	1	0	0	5	0	0	0.001426	0	0.001626	0	0	0.009184	0	Bacteria	Proteobacteria	Alphaproteobacteria	Rhodobacterales	Rhodobacteraceae	Ascidiaceihabitans
Otu002119	7	0	0	0	7	0	0	0	0	0	0	0	0.011383	0	0	0	0	Bacteria	Actinobacteria	Actinobacteria	Micrococcales	Micrococcaceae	Micrococcus	Micrococcus_luteus
Otu002125	7	5	0	1	0	0	0	1	0	0.008961	0	0.001765	0	0	0	0.001837	0	Bacteria	Firmicutes	Bacilli	Lactobacillales	Lactobacillaceae	Lactobacillus
Otu002169	7	1	0	6	0	0	0	0	0	0.001792	0	0.01059	0	0	0	0	0	Bacteria	Firmicutes	Bacilli	Lactobacillales	Streptococcaceae	Streptococcus	Streptococcus_danieliae
Otu002178	7	2	0	2	2	0	1	0	0	0.003584	0	0.00353	0.003252	0	0.001972	0	0	Bacteria	Firmicutes	Bacilli	Lactobacillales	Lactobacillaceae	Lactobacillus	Lactobacillus_murinus
Otu002247	7	0	0	0	0	3	0	4	0	0	0	0	0	0.004628	0	0.007347	0	Bacteria	Bacteroidetes	Bacteroidia	Bacteroidales	Muribaculaceae
Otu002254	7	0	0	0	0	2	1	2	2	0	0	0	0	0.003086	0.001972	0.003673	0.003792	Bacteria	Actinobacteria	Coriobacteriia	Coriobacteriales	Eggerthellaceae	Enterorhabdus	Enterorhabdus_caecimuris_B7
Otu002331	7	0	0	0	0	0	0	6	1	0	0	0	0	0	0	0.01102	0.001896	Bacteria	Bacteroidetes	Bacteroidia	Bacteroidales	Muribaculaceae
Otu002399	7	4	0	1	1	0	1	0	0	0.007169	0	0.001765	0.001626	0	0.001972	0	0	Bacteria	Firmicutes	Bacilli	Lactobacillales	Lactobacillaceae	Lactobacillus	Lactobacillus_murinus
Otu002486	7	1	0	2	0	0	4	0	0	0.001792	0	0.00353	0	0	0.007889	0	0	Bacteria	Firmicutes	Bacilli	Lactobacillales	Lactobacillaceae	Lactobacillus	Lactobacillus_murinus
Otu002567	7	0	0	0	0	1	5	0	1	0	0	0	0	0.001543	0.009861	0	0.001896	Bacteria	Bacteroidetes	Bacteroidia	Bacteroidales	Rikenellaceae	Alistipes
Otu002569	7	0	0	5	2	0	0	0	0	0	0	0.008825	0.003252	0	0	0	0	Bacteria	Firmicutes	Bacilli	Lactobacillales	Lactobacillaceae	Lactobacillus
Otu002619	7	3	0	3	1	0	0	0	0	0.005377	0	0.005295	0.001626	0	0	0	0	Bacteria	Firmicutes	Bacilli	Lactobacillales	Lactobacillaceae	Lactobacillus
Otu002689	7	7	0	0	0	0	0	0	0	0.012546	0	0	0	0	0	0	0	Bacteria	Actinobacteria	Actinobacteria	Micrococcales
Otu000109	6	2	0	2	1	0	1	0	0	0.003584	0	0.00353	0.001626	0	0.001972	0	0	Bacteria	Firmicutes	Clostridia	Clostridiales	Ruminococcaceae	Ruminococcaceae_UCG-014
Otu000165	6	0	0	0	1	1	2	2	0	0	0	0	0.001626	0.001543	0.003944	0.003673	0	Bacteria	Firmicutes	Clostridia	Clostridiales	Peptococcaceae
Otu000228	6	0	0	0	4	0	0	0	2	0	0	0	0.006505	0	0	0	0.003792	Bacteria	Actinobacteria	Coriobacteriia	Coriobacteriales	Eggerthellaceae
Otu000229	6	5	1	0	0	0	0	0	0	0.008961	0.001426	0	0	0	0	0	0	Bacteria	Firmicutes	Clostridia	Clostridiales	Ruminococcaceae	Ruminococcaceae_NK4A214_group
Otu000236	6	0	0	3	1	0	0	2	0	0	0	0.005295	0.001626	0	0	0.003673	0	Bacteria	Firmicutes	Bacilli	Lactobacillales	Lactobacillaceae	Lactobacillus	Lactobacillus_iners_LactinV_11V1-d
Otu000247	6	0	0	1	5	0	0	0	0	0	0	0.001765	0.008131	0	0	0	0	Bacteria	Bacteroidetes	Bacteroidia	Bacteroidales	Muribaculaceae
Otu000349	6	0	0	0	0	1	2	3	0	0	0	0	0	0.001543	0.003944	0.00551	0	Bacteria	Bacteroidetes	Bacteroidia	Bacteroidales	Muribaculaceae
Otu000396	6	0	6	0	0	0	0	0	0	0	0.008559	0	0	0	0	0	0	Bacteria	Proteobacteria	Alphaproteobacteria	Rhodospirillales
Otu000422	6	0	6	0	0	0	0	0	0	0	0.008559	0	0	0	0	0	0	Bacteria	Firmicutes	Clostridia	Clostridiales	Lachnospiraceae	Acetatifactor
Otu000426	6	0	0	0	0	0	4	0	2	0	0	0	0	0	0.007889	0	0.003792	Bacteria	Bacteroidetes	Bacteroidia	Bacteroidales	Muribaculaceae
Otu000591	6	0	0	0	0	2	0	4	0	0	0	0	0	0.003086	0	0.007347	0	Bacteria	Firmicutes	Clostridia	Clostridiales	Lachnospiraceae
Otu000607	6	0	0	0	0	1	3	2	0	0	0	0	0	0.001543	0.005917	0.003673	0	Bacteria	Firmicutes	Clostridia	Clostridiales	Ruminococcaceae	Ruminiclostridium_9
Otu000834	6	0	6	0	0	0	0	0	0	0	0.008559	0	0	0	0	0	0	Bacteria	Verrucomicrobia	Verrucomicrobiae	Verrucomicrobiales	Akkermansiaceae	Akkermansia	Akkermansia_muciniphila
Otu000856	6	0	0	0	0	5	0	1	0	0	0	0	0	0.007714	0	0.001837	0	Bacteria	Firmicutes	Clostridia	Clostridiales	Clostridiales_vadinBB60_group
Otu000893	6	0	0	0	6	0	0	0	0	0	0	0	0.009757	0	0	0	0	Bacteria	Firmicutes	Clostridia	Clostridiales	Lachnospiraceae	Lachnospiraceae_NK4A136_group
Otu000986	6	6	0	0	0	0	0	0	0	0.010753	0	0	0	0	0	0	0	Bacteria	Firmicutes	Bacilli	Lactobacillales	Leuconostocaceae	Leuconostoc	Leuconostoc_pseudomesenteroides
Otu001025	6	0	0	0	0	3	0	3	0	0	0	0	0	0.004628	0	0.00551	0	Bacteria	Firmicutes	Clostridia	Clostridiales	Family_XIII	Anaerovorax
Otu001081	6	0	1	0	0	0	2	1	2	0	0.001426	0	0	0	0.003944	0.001837	0.003792	Bacteria	Firmicutes	Clostridia	Clostridiales	Christensenellaceae
Otu001123	6	0	6	0	0	0	0	0	0	0	0.008559	0	0	0	0	0	0	Bacteria	Verrucomicrobia	Verrucomicrobiae	Verrucomicrobiales	Akkermansiaceae	Akkermansia	Akkermansia_muciniphila
Otu001135	6	0	0	0	1	4	1	0	0	0	0	0	0.001626	0.006171	0.001972	0	0	Bacteria	Bacteroidetes	Bacteroidia	Bacteroidales	Muribaculaceae
Otu001212	6	0	0	0	1	1	0	4	0	0	0	0	0.001626	0.001543	0	0.007347	0	Bacteria	Bacteroidetes	Bacteroidia	Bacteroidales	Muribaculaceae
Otu001225	6	0	6	0	0	0	0	0	0	0	0.008559	0	0	0	0	0	0	Bacteria	Verrucomicrobia	Verrucomicrobiae	Verrucomicrobiales	Akkermansiaceae	Akkermansia	Akkermansia_muciniphila
Otu001371	6	0	2	0	0	0	0	2	2	0	0.002853	0	0	0	0	0.003673	0.003792	Bacteria	Bacteroidetes	Bacteroidia	Bacteroidales	Muribaculaceae
Otu001424	6	0	0	0	0	2	0	4	0	0	0	0	0	0.003086	0	0.007347	0	Bacteria	Firmicutes	Clostridia	Clostridiales	Lachnospiraceae
Otu001425	6	0	6	0	0	0	0	0	0	0	0.008559	0	0	0	0	0	0	Bacteria	Verrucomicrobia	Verrucomicrobiae	Verrucomicrobiales	Akkermansiaceae	Akkermansia	Akkermansia_muciniphila
Otu001522	6	0	0	0	0	0	0	0	6	0	0	0	0	0	0	0	0.011377	Bacteria	Bacteroidetes	Bacteroidia	Bacteroidales	Muribaculaceae
Otu001549	6	0	0	0	0	1	0	0	5	0	0	0	0	0.001543	0	0	0.00948	Bacteria	Actinobacteria	Coriobacteriia	Coriobacteriales	Eggerthellaceae	Enterorhabdus	Enterorhabdus_caecimuris_B7
Otu001626	6	0	6	0	0	0	0	0	0	0	0.008559	0	0	0	0	0	0	Bacteria	Verrucomicrobia	Verrucomicrobiae	Verrucomicrobiales	Akkermansiaceae	Akkermansia	Akkermansia_muciniphila
Otu001693	6	0	0	0	0	0	4	0	2	0	0	0	0	0	0.007889	0	0.003792	Bacteria	Firmicutes	Bacilli	Lactobacillales	Lactobacillaceae	Lactobacillus
Otu001734	6	0	0	0	0	4	0	0	2	0	0	0	0	0.006171	0	0	0.003792	Bacteria	Bacteroidetes	Bacteroidia	Bacteroidales	Muribaculaceae
Otu001783	6	0	0	0	0	3	0	0	3	0	0	0	0	0.004628	0	0	0.005688	Bacteria	Bacteroidetes	Bacteroidia	Bacteroidales	Prevotellaceae
Otu001846	6	0	0	0	0	0	5	0	1	0	0	0	0	0	0.009861	0	0.001896	Bacteria	Epsilonbacteraeota	Campylobacteria	Campylobacterales	Helicobacteraceae	Helicobacter
Otu001872	6	0	0	0	0	1	0	1	4	0	0	0	0	0.001543	0	0.001837	0.007584	Bacteria	Bacteroidetes	Bacteroidia	Bacteroidales	Muribaculaceae
Otu001999	6	0	0	0	0	1	0	0	5	0	0	0	0	0.001543	0	0	0.00948	Bacteria	Bacteroidetes	Bacteroidia	Bacteroidales	Prevotellaceae	Alloprevotella
Otu002022	6	0	0	0	0	0	0	0	6	0	0	0	0	0	0	0	0.011377	Bacteria	Bacteroidetes	Bacteroidia	Bacteroidales	Prevotellaceae	Alloprevotella
Otu002052	6	1	0	3	1	0	1	0	0	0.001792	0	0.005295	0.001626	0	0.001972	0	0	Bacteria	Firmicutes	Bacilli	Lactobacillales	Lactobacillaceae	Lactobacillus
Otu002070	6	1	0	3	1	0	0	0	1	0.001792	0	0.005295	0.001626	0	0	0	0.001896	Bacteria	Firmicutes	Bacilli	Lactobacillales	Lactobacillaceae	Lactobacillus	Lactobacillus_murinus
Otu002183	6	2	0	0	4	0	0	0	0	0.003584	0	0	0.006505	0	0	0	0	Bacteria	Firmicutes	Bacilli	Lactobacillales	Lactobacillaceae	Lactobacillus	Lactobacillus_murinus
Otu002242	6	2	0	2	0	0	2	0	0	0.003584	0	0.00353	0	0	0.003944	0	0	Bacteria	Firmicutes	Bacilli	Lactobacillales	Lactobacillaceae	Lactobacillus	Lactobacillus_murinus
Otu002262	6	2	0	1	3	0	0	0	0	0.003584	0	0.001765	0.004879	0	0	0	0	Bacteria	Firmicutes	Bacilli	Lactobacillales	Lactobacillaceae	Lactobacillus	Lactobacillus_murinus
Otu002375	6	1	0	1	3	0	0	1	0	0.001792	0	0.001765	0.004879	0	0	0.001837	0	Bacteria	Firmicutes	Bacilli	Lactobacillales	Lactobacillaceae	Lactobacillus
Otu002389	6	2	0	1	3	0	0	0	0	0.003584	0	0.001765	0.004879	0	0	0	0	Bacteria	Firmicutes	Bacilli	Lactobacillales	Lactobacillaceae	Lactobacillus
Otu002507	6	0	0	0	0	0	0	0	6	0	0	0	0	0	0	0	0.011377	Bacteria	Bacteroidetes	Bacteroidia	Bacteroidales	Prevotellaceae	Prevotella_7
Otu002554	6	0	0	0	6	0	0	0	0	0	0	0	0.009757	0	0	0	0	Bacteria	Firmicutes	Bacilli	Lactobacillales	Lactobacillaceae	Lactobacillus
Otu002559	6	2	0	0	2	0	2	0	0	0.003584	0	0	0.003252	0	0.003944	0	0	Bacteria	Firmicutes	Bacilli	Lactobacillales	Lactobacillaceae	Lactobacillus	Lactobacillus_murinus
Otu002584	6	0	0	0	0	0	0	0	6	0	0	0	0	0	0	0	0.011377	Bacteria	Bacteroidetes	Bacteroidia	Bacteroidales	Prevotellaceae	Alloprevotella
Otu002636	6	3	0	2	1	0	0	0	0	0.005377	0	0.00353	0.001626	0	0	0	0	Bacteria	Firmicutes	Bacilli	Lactobacillales	Lactobacillaceae	Lactobacillus
Otu002656	6	0	0	0	0	0	2	2	2	0	0	0	0	0	0.003944	0.003673	0.003792	Bacteria	Bacteroidetes	Bacteroidia	Bacteroidales	Muribaculaceae
Otu002668	6	1	0	2	3	0	0	0	0	0.001792	0	0.00353	0.004879	0	0	0	0	Bacteria	Firmicutes	Bacilli	Lactobacillales	Lactobacillaceae	Lactobacillus
Otu002797	6	1	0	5	0	0	0	0	0	0.001792	0	0.008825	0	0	0	0	0	Bacteria	Firmicutes	Bacilli	Lactobacillales	Lactobacillaceae	Lactobacillus
Otu002855	6	0	0	0	0	1	1	0	4	0	0	0	0	0.001543	0.001972	0	0.007584	Bacteria	Firmicutes	Clostridia	Clostridiales	Lachnospiraceae	Blautia	Lachnospiraceae_bacterium_28-4
Otu002865	6	0	6	0	0	0	0	0	0	0	0.008559	0	0	0	0	0	0	Bacteria	Bacteroidetes	Bacteroidia	Bacteroidales	Muribaculaceae
Otu002873	6	0	0	6	0	0	0	0	0	0	0	0.01059	0	0	0	0	0	Bacteria	Firmicutes	Clostridia	Clostridiales	Lachnospiraceae	Fusicatenibacter	Fusicatenibacter_saccharivorans
Otu002901	6	0	0	0	6	0	0	0	0	0	0	0	0.009757	0	0	0	0	Bacteria	Firmicutes	Bacilli	Bacillales	Alicyclobacillaceae	Kyrpidia
Otu002919	6	6	0	0	0	0	0	0	0	0.010753	0	0	0	0	0	0	0	Bacteria	Firmicutes	Bacilli	Lactobacillales	Carnobacteriaceae	Pisciglobus
Otu002935	6	0	0	6	0	0	0	0	0	0	0	0.01059	0	0	0	0	0	Bacteria	Bacteroidetes	Bacteroidia	Bacteroidales	Bacteroidaceae	Bacteroides	Bacteroides_stercoris_ATCC_43183
Otu002956	6	0	0	6	0	0	0	0	0	0	0	0.01059	0	0	0	0	0	Bacteria	Firmicutes	Clostridia	Clostridiales	Christensenellaceae	Christensenellaceae_R-7_group
Otu002986	6	6	0	0	0	0	0	0	0	0.010753	0	0	0	0	0	0	0	Bacteria	Bacteroidetes	Bacteroidia	Bacteroidales	Prevotellaceae	Alloprevotella	Prevotella_sp_oral_clone_HF050
Otu002991	6	3	0	1	2	0	0	0	0	0.005377	0	0.001765	0.003252	0	0	0	0	Bacteria	Firmicutes	Bacilli	Lactobacillales	Lactobacillaceae	Lactobacillus
Otu003116	6	6	0	0	0	0	0	0	0	0.010753	0	0	0	0	0	0	0	Bacteria	Proteobacteria	Gammaproteobacteria	Betaproteobacteriales	Rhodocyclaceae
Otu000127	5	1	0	0	0	0	3	0	1	0.001792	0	0	0	0	0.005917	0	0.001896	Bacteria	Bacteroidetes	Bacteroidia	Bacteroidales	Muribaculaceae
Otu000210	5	0	0	0	4	0	1	0	0	0	0	0	0.006505	0	0.001972	0	0	Bacteria	Firmicutes	Clostridia	Clostridiales	Lachnospiraceae	Marvinbryantia
Otu000235	5	0	2	0	0	0	1	0	2	0	0.002853	0	0	0	0.001972	0	0.003792	Bacteria	Firmicutes	Clostridia	Clostridiales	Lachnospiraceae	Eubacterium_ventriosum_group
Otu000261	5	0	0	1	0	2	1	1	0	0	0	0.001765	0	0.003086	0.001972	0.001837	0	Bacteria	Firmicutes	Clostridia	Clostridiales	Lachnospiraceae
Otu000307	5	0	2	0	1	0	2	0	0	0	0.002853	0	0.001626	0	0.003944	0	0	Bacteria	Bacteroidetes	Bacteroidia	Bacteroidales	Rikenellaceae	Alistipes
Otu000353	5	0	0	0	2	0	0	0	3	0	0	0	0.003252	0	0	0	0.005688	Bacteria	Firmicutes	Clostridia	Clostridiales	Ruminococcaceae	Ruminococcaceae_UCG-010
Otu000360	5	0	0	0	5	0	0	0	0	0	0	0	0.008131	0	0	0	0	Bacteria	Firmicutes	Erysipelotrichia	Erysipelotrichales	Erysipelotrichaceae	Dubosiella
Otu000385	5	0	0	0	0	3	0	1	1	0	0	0	0	0.004628	0	0.001837	0.001896	Bacteria	Firmicutes	Clostridia	Clostridiales	Ruminococcaceae	Ruminococcaceae_UCG-005
Otu000401	5	0	0	0	0	0	4	0	1	0	0	0	0	0	0.007889	0	0.001896	Bacteria	Bacteroidetes	Bacteroidia	Bacteroidales	Muribaculaceae
Otu000407	5	1	0	0	0	4	0	0	0	0.001792	0	0	0	0.006171	0	0	0	Bacteria	Firmicutes	Clostridia	Clostridiales	Ruminococcaceae	Ruminiclostridium_9
Otu000464	5	0	0	0	4	1	0	0	0	0	0	0	0.006505	0.001543	0	0	0	Bacteria	Firmicutes	Erysipelotrichia	Erysipelotrichales	Erysipelotrichaceae	Dubosiella
Otu000482	5	0	0	0	0	3	0	2	0	0	0	0	0	0.004628	0	0.003673	0	Bacteria	Bacteroidetes	Bacteroidia	Bacteroidales	Muribaculaceae
Otu000521	5	0	5	0	0	0	0	0	0	0	0.007132	0	0	0	0	0	0	Bacteria	Bacteroidetes	Bacteroidia	Bacteroidales
Otu000527	5	0	5	0	0	0	0	0	0	0	0.007132	0	0	0	0	0	0	Bacteria	Bacteroidetes	Bacteroidia	Bacteroidales	Muribaculaceae
Otu000560	5	0	1	0	0	2	1	0	1	0	0.001426	0	0	0.003086	0.001972	0	0.001896	Bacteria	Bacteroidetes	Bacteroidia	Bacteroidales	Muribaculaceae
Otu000589	5	0	1	0	4	0	0	0	0	0	0.001426	0	0.006505	0	0	0	0	Bacteria	Firmicutes	Clostridia	Clostridiales	Ruminococcaceae	Ruminiclostridium_5
Otu000690	5	0	0	0	0	2	2	0	1	0	0	0	0	0.003086	0.003944	0	0.001896	Bacteria	Firmicutes	Clostridia	Clostridiales	Lachnospiraceae
Otu000722	5	0	0	0	0	1	2	0	2	0	0	0	0	0.001543	0.003944	0	0.003792	Bacteria	Firmicutes	Clostridia	Clostridiales	Ruminococcaceae	Ruminococcaceae_UCG-014
Otu000773	5	0	0	0	0	1	0	4	0	0	0	0	0	0.001543	0	0.007347	0	Bacteria	Firmicutes	Clostridia	Clostridiales	Lachnospiraceae	Tyzzerella_3
Otu000868	5	0	0	0	5	0	0	0	0	0	0	0	0.008131	0	0	0	0	Bacteria	Firmicutes	Clostridia	Clostridiales	Ruminococcaceae
Otu000909	5	0	4	0	1	0	0	0	0	0	0.005706	0	0.001626	0	0	0	0	Bacteria	Verrucomicrobia	Verrucomicrobiae	Verrucomicrobiales	Akkermansiaceae	Akkermansia	Akkermansia_muciniphila
Otu000910	5	0	4	0	0	1	0	0	0	0	0.005706	0	0	0.001543	0	0	0	Bacteria	Verrucomicrobia	Verrucomicrobiae	Verrucomicrobiales	Akkermansiaceae	Akkermansia
Otu000979	5	0	1	0	0	3	1	0	0	0	0.001426	0	0	0.004628	0.001972	0	0	Bacteria	Firmicutes	Clostridia	Clostridiales	Ruminococcaceae	Ruminiclostridium_9
Otu000988	5	0	4	0	0	0	0	0	1	0	0.005706	0	0	0	0	0	0.001896	Bacteria	Bacteroidetes	Bacteroidia	Bacteroidales	Muribaculaceae
Otu001146	5	0	0	0	0	0	0	1	4	0	0	0	0	0	0	0.001837	0.007584	Bacteria	Bacteroidetes	Bacteroidia	Bacteroidales	Muribaculaceae
Otu001181	5	0	5	0	0	0	0	0	0	0	0.007132	0	0	0	0	0	0	Bacteria	Verrucomicrobia	Verrucomicrobiae	Verrucomicrobiales	Akkermansiaceae	Akkermansia	Akkermansia_muciniphila
Otu001215	5	0	5	0	0	0	0	0	0	0	0.007132	0	0	0	0	0	0	Bacteria	Verrucomicrobia	Verrucomicrobiae	Verrucomicrobiales	Akkermansiaceae	Akkermansia	Akkermansia_muciniphila
Otu001234	5	0	1	1	0	2	0	1	0	0	0.001426	0.001765	0	0.003086	0	0.001837	0	Bacteria	Firmicutes	Clostridia	Clostridiales	Lachnospiraceae
Otu001276	5	0	4	0	0	0	0	0	1	0	0.005706	0	0	0	0	0	0.001896	Bacteria	Verrucomicrobia	Verrucomicrobiae	Verrucomicrobiales	Akkermansiaceae	Akkermansia	Akkermansia_muciniphila
Otu001317	5	0	0	0	0	1	0	1	3	0	0	0	0	0.001543	0	0.001837	0.005688	Bacteria	Bacteroidetes	Bacteroidia	Bacteroidales	Prevotellaceae
Otu001369	5	0	4	1	0	0	0	0	0	0	0.005706	0.001765	0	0	0	0	0	Bacteria	Verrucomicrobia	Verrucomicrobiae	Verrucomicrobiales	Akkermansiaceae	Akkermansia	Akkermansia_muciniphila
Otu001412	5	0	5	0	0	0	0	0	0	0	0.007132	0	0	0	0	0	0	Bacteria	Verrucomicrobia	Verrucomicrobiae	Verrucomicrobiales	Akkermansiaceae	Akkermansia	Akkermansia_muciniphila
Otu001503	5	0	3	0	1	0	0	0	1	0	0.004279	0	0.001626	0	0	0	0.001896	Bacteria	Bacteroidetes	Bacteroidia	Bacteroidales	Bacteroidaceae	Bacteroides	Bacteroides_acidifaciens
Otu001543	5	0	0	0	0	0	0	1	4	0	0	0	0	0	0	0.001837	0.007584	Bacteria	Bacteroidetes	Bacteroidia	Bacteroidales	Prevotellaceae	Alloprevotella
Otu001565	5	0	0	0	0	3	0	2	0	0	0	0	0	0.004628	0	0.003673	0	Bacteria	Bacteroidetes	Bacteroidia	Bacteroidales	Muribaculaceae
Otu001577	5	0	1	0	0	4	0	0	0	0	0.001426	0	0	0.006171	0	0	0	Bacteria
Otu001627	5	0	0	0	0	2	0	3	0	0	0	0	0	0.003086	0	0.00551	0	Bacteria	Firmicutes	Clostridia	Clostridiales	Lachnospiraceae
Otu001655	5	0	5	0	0	0	0	0	0	0	0.007132	0	0	0	0	0	0	Bacteria	Verrucomicrobia	Verrucomicrobiae	Verrucomicrobiales	Akkermansiaceae	Akkermansia	Akkermansia_muciniphila
Otu001755	5	0	0	0	0	0	0	5	0	0	0	0	0	0	0	0.009184	0	Bacteria	Firmicutes	Clostridia	Clostridiales	Lachnospiraceae	A2
Otu001768	5	0	0	0	0	0	0	0	5	0	0	0	0	0	0	0	0.00948	Bacteria	Bacteroidetes	Bacteroidia	Bacteroidales	Muribaculaceae
Otu001938	5	0	5	0	0	0	0	0	0	0	0.007132	0	0	0	0	0	0	Bacteria	Verrucomicrobia	Verrucomicrobiae	Verrucomicrobiales	Akkermansiaceae	Akkermansia
Otu001943	5	0	1	0	0	2	0	2	0	0	0.001426	0	0	0.003086	0	0.003673	0	Bacteria	Bacteroidetes	Bacteroidia	Bacteroidales	Muribaculaceae
Otu001958	5	0	0	0	0	0	0	0	5	0	0	0	0	0	0	0	0.00948	Bacteria	Bacteroidetes	Bacteroidia	Bacteroidales	Muribaculaceae
Otu001962	5	0	0	0	1	0	0	0	4	0	0	0	0.001626	0	0	0	0.007584	Bacteria	Bacteroidetes	Bacteroidia	Bacteroidales
Otu001995	5	0	0	0	0	0	0	1	4	0	0	0	0	0	0	0.001837	0.007584	Bacteria	Bacteroidetes	Bacteroidia	Bacteroidales	Muribaculaceae
Otu002048	5	4	0	0	0	0	0	1	0	0.007169	0	0	0	0	0	0.001837	0	Bacteria	Firmicutes	Bacilli	Lactobacillales	Lactobacillaceae	Lactobacillus
Otu002055	5	0	0	0	0	1	1	0	3	0	0	0	0	0.001543	0.001972	0	0.005688	Bacteria	Bacteroidetes	Bacteroidia	Bacteroidales	Prevotellaceae	Alloprevotella
Otu002069	5	0	0	4	1	0	0	0	0	0	0	0.00706	0.001626	0	0	0	0	Bacteria	Actinobacteria	Actinobacteria	Micrococcales	Microbacteriaceae
Otu002130	5	0	5	0	0	0	0	0	0	0	0.007132	0	0	0	0	0	0	Bacteria	Verrucomicrobia	Verrucomicrobiae	Verrucomicrobiales	Akkermansiaceae	Akkermansia	Akkermansia_muciniphila
Otu002164	5	2	0	0	2	0	1	0	0	0.003584	0	0	0.003252	0	0.001972	0	0	Bacteria	Firmicutes	Bacilli	Lactobacillales	Lactobacillaceae	Lactobacillus	Lactobacillus_murinus
Otu002168	5	0	0	0	0	0	0	1	4	0	0	0	0	0	0	0.001837	0.007584	Bacteria	Bacteroidetes	Bacteroidia	Bacteroidales	Prevotellaceae
Otu002231	5	0	0	0	0	0	5	0	0	0	0	0	0	0	0.009861	0	0	Bacteria	Firmicutes	Clostridia	Clostridiales	Lachnospiraceae
Otu002235	5	2	0	1	1	0	1	0	0	0.003584	0	0.001765	0.001626	0	0.001972	0	0	Bacteria	Firmicutes	Bacilli	Lactobacillales	Lactobacillaceae	Lactobacillus	Lactobacillus_murinus
Otu002240	5	2	0	0	2	1	0	0	0	0.003584	0	0	0.003252	0.001543	0	0	0	Bacteria	Firmicutes	Bacilli	Lactobacillales	Lactobacillaceae	Lactobacillus
Otu002277	5	1	0	1	2	0	0	1	0	0.001792	0	0.001765	0.003252	0	0	0.001837	0	Bacteria	Firmicutes	Bacilli	Lactobacillales	Lactobacillaceae	Lactobacillus	Lactobacillus_gasseri
Otu002343	5	0	0	0	0	1	0	0	4	0	0	0	0	0.001543	0	0	0.007584	Bacteria	Bacteroidetes	Bacteroidia	Bacteroidales	Prevotellaceae
Otu002347	5	0	0	0	0	1	0	1	3	0	0	0	0	0.001543	0	0.001837	0.005688	Bacteria	Bacteroidetes	Bacteroidia	Bacteroidales	Muribaculaceae
Otu002463	5	3	0	0	0	0	0	0	2	0.005377	0	0	0	0	0	0	0.003792	Bacteria	Proteobacteria	Alphaproteobacteria	Rhizobiales	Xanthobacteraceae	Pseudolabrys
Otu002523	5	0	0	0	0	2	0	2	1	0	0	0	0	0.003086	0	0.003673	0.001896	Bacteria	Firmicutes	Clostridia	Clostridiales	Lachnospiraceae
Otu002525	5	0	0	0	0	1	0	1	3	0	0	0	0	0.001543	0	0.001837	0.005688	Bacteria	Bacteroidetes	Bacteroidia	Bacteroidales	Muribaculaceae
Otu002570	5	0	0	2	3	0	0	0	0	0	0	0.00353	0.004879	0	0	0	0	Bacteria	Proteobacteria	Alphaproteobacteria	Rhizobiales	Beijerinckiaceae	Bosea
Otu002632	5	0	0	3	1	0	1	0	0	0	0	0.005295	0.001626	0	0.001972	0	0	Bacteria	Firmicutes	Bacilli	Lactobacillales	Lactobacillaceae	Lactobacillus	Lactobacillus_murinus
Otu002681	5	2	0	2	0	0	0	0	1	0.003584	0	0.00353	0	0	0	0	0.001896	Bacteria	Firmicutes	Bacilli	Lactobacillales	Lactobacillaceae	Lactobacillus	Lactobacillus_murinus
Otu002781	5	0	0	0	0	1	4	0	0	0	0	0	0	0.001543	0.007889	0	0	Bacteria	Firmicutes	Clostridia	Clostridiales	Lachnospiraceae
Otu002796	5	0	0	0	0	1	1	3	0	0	0	0	0	0.001543	0.001972	0.00551	0	Bacteria	Firmicutes	Bacilli	Lactobacillales	Lactobacillaceae	Lactobacillus
Otu002835	5	1	0	2	1	0	1	0	0	0.001792	0	0.00353	0.001626	0	0.001972	0	0	Bacteria	Firmicutes	Bacilli	Lactobacillales	Lactobacillaceae	Lactobacillus	Lactobacillus_murinus
Otu002853	5	1	0	2	2	0	0	0	0	0.001792	0	0.00353	0.003252	0	0	0	0	Bacteria	Firmicutes	Bacilli	Lactobacillales	Lactobacillaceae	Lactobacillus	Lactobacillus_murinus
Otu002856	5	0	5	0	0	0	0	0	0	0	0.007132	0	0	0	0	0	0	Bacteria	Bacteroidetes	Bacteroidia	Bacteroidales
Otu002908	5	2	0	3	0	0	0	0	0	0.003584	0	0.005295	0	0	0	0	0	Bacteria	Firmicutes	Bacilli	Lactobacillales	Lactobacillaceae	Lactobacillus	Lactobacillus_murinus
Otu002946	5	1	0	0	2	0	2	0	0	0.001792	0	0	0.003252	0	0.003944	0	0	Bacteria	Firmicutes	Bacilli	Lactobacillales	Lactobacillaceae	Lactobacillus	Lactobacillus_murinus
Otu002975	5	0	0	0	0	0	1	2	2	0	0	0	0	0	0.001972	0.003673	0.003792	Bacteria	Bacteroidetes	Bacteroidia	Bacteroidales	Muribaculaceae
Otu003004	5	0	0	0	0	0	4	0	1	0	0	0	0	0	0.007889	0	0.001896	Bacteria	Bacteroidetes	Bacteroidia	Bacteroidales	Rikenellaceae	Alistipes
Otu003046	5	0	0	0	0	5	0	0	0	0	0	0	0	0.007714	0	0	0	Bacteria	Firmicutes	Clostridia	Clostridiales	Lachnospiraceae	Lachnospiraceae_NK4A136_group
Otu003077	5	0	0	3	2	0	0	0	0	0	0	0.005295	0.003252	0	0	0	0	Bacteria	Cyanobacteria	Oxyphotobacteria	Chloroplast
Otu003093	5	0	1	0	0	3	0	0	1	0	0.001426	0	0	0.004628	0	0	0.001896	Bacteria	Bacteroidetes	Bacteroidia	Bacteroidales	Muribaculaceae
Otu003112	5	0	0	0	5	0	0	0	0	0	0	0	0.008131	0	0	0	0	Bacteria	Firmicutes	Bacilli	Bacillales	Bacillaceae	Bacillus	Bacillus_selenatarsenatis
Otu003135	5	0	0	2	2	0	0	1	0	0	0	0.00353	0.003252	0	0	0.001837	0	Bacteria	Firmicutes	Bacilli	Lactobacillales	Lactobacillaceae	Lactobacillus	Lactobacillus_gasseri
Otu003163	5	0	0	0	5	0	0	0	0	0	0	0	0.008131	0	0	0	0	Bacteria	Proteobacteria	Gammaproteobacteria	Alteromonadales	Colwelliaceae	Thalassotalea
Otu003230	5	0	0	0	5	0	0	0	0	0	0	0	0.008131	0	0	0	0	Bacteria	Proteobacteria	Alphaproteobacteria	Rhizobiales	Rhizobiaceae	Allorhizobium-Neorhizobium-Pararhizobium-Rhizobium
Otu003242	5	5	0	0	0	0	0	0	0	0.008961	0	0	0	0	0	0	0	Bacteria	Proteobacteria	Alphaproteobacteria	Sphingomonadales	Sphingomonadaceae	Blastomonas
Otu003303	5	0	0	4	1	0	0	0	0	0	0	0.00706	0.001626	0	0	0	0	Bacteria	Firmicutes	Bacilli	Lactobacillales	Streptococcaceae	Streptococcus	Streptococcus_danieliae
Otu003330	5	5	0	0	0	0	0	0	0	0.008961	0	0	0	0	0	0	0	Bacteria	Proteobacteria	Alphaproteobacteria	Rhodobacterales	Rhodobacteraceae	Lentibacter
Otu003383	5	0	0	0	0	3	2	0	0	0	0	0	0	0.004628	0.003944	0	0	Bacteria	Firmicutes	Clostridia	Clostridiales	Lachnospiraceae
Otu000187	4	1	1	0	2	0	0	0	0	0.001792	0.001426	0	0.003252	0	0	0	0	Bacteria	Firmicutes	Clostridia	Clostridiales	Lachnospiraceae
Otu000219	4	0	0	0	1	3	0	0	0	0	0	0	0.001626	0.004628	0	0	0	Bacteria	Firmicutes	Clostridia	Clostridiales	Lachnospiraceae
Otu000227	4	0	0	0	0	0	0	3	1	0	0	0	0	0	0	0.00551	0.001896	Bacteria	Proteobacteria	Alphaproteobacteria	Rhizobiales	Xanthobacteraceae
Otu000252	4	2	0	1	1	0	0	0	0	0.003584	0	0.001765	0.001626	0	0	0	0	Bacteria	Firmicutes	Bacilli	Bacillales	Bacillaceae	Pseudogracilibacillus
Otu000269	4	1	0	1	1	0	1	0	0	0.001792	0	0.001765	0.001626	0	0.001972	0	0	Bacteria	Bacteroidetes	Bacteroidia	Bacteroidales	Muribaculaceae
Otu000295	4	0	0	0	0	1	3	0	0	0	0	0	0	0.001543	0.005917	0	0	Bacteria	Bacteroidetes	Bacteroidia	Bacteroidales	Muribaculaceae
Otu000308	4	0	1	0	3	0	0	0	0	0	0.001426	0	0.004879	0	0	0	0	Bacteria	Bacteroidetes	Bacteroidia	Bacteroidales	Muribaculaceae
Otu000336	4	0	0	1	2	0	0	1	0	0	0	0.001765	0.003252	0	0	0.001837	0	Bacteria	Firmicutes	Bacilli	Lactobacillales	Lactobacillaceae	Lactobacillus	Lactobacillus_iners_LactinV_11V1-d
Otu000410	4	0	0	0	4	0	0	0	0	0	0	0	0.006505	0	0	0	0	Bacteria	Firmicutes	Clostridia	Clostridiales	Lachnospiraceae
Otu000533	4	0	0	1	0	0	2	1	0	0	0	0.001765	0	0	0.003944	0.001837	0	Bacteria	Firmicutes	Clostridia	Clostridiales	Lachnospiraceae	Roseburia	Eubacterium_sp_14-2
Otu000543	4	0	0	0	4	0	0	0	0	0	0	0	0.006505	0	0	0	0	Bacteria	Bacteroidetes	Bacteroidia	Bacteroidales	Muribaculaceae
Otu000648	4	0	0	0	0	0	0	0	4	0	0	0	0	0	0	0	0.007584	Bacteria	Bacteroidetes	Bacteroidia	Bacteroidales	Muribaculaceae
Otu000737	4	0	0	0	0	1	1	2	0	0	0	0	0	0.001543	0.001972	0.003673	0	Bacteria	Bacteroidetes	Bacteroidia	Bacteroidales	Muribaculaceae
Otu000809	4	0	0	0	3	0	1	0	0	0	0	0	0.004879	0	0.001972	0	0	Bacteria	Firmicutes	Clostridia	Clostridiales	Ruminococcaceae	Ruminococcaceae_UCG-014
Otu000817	4	0	0	0	0	1	1	1	1	0	0	0	0	0.001543	0.001972	0.001837	0.001896	Bacteria	Firmicutes	Clostridia	Clostridiales	Ruminococcaceae
Otu000844	4	0	0	0	4	0	0	0	0	0	0	0	0.006505	0	0	0	0	Bacteria	Patescibacteria	Saccharimonadia	Saccharimonadales	soil_bacterium_WF55
Otu000887	4	0	0	0	4	0	0	0	0	0	0	0	0.006505	0	0	0	0	Bacteria	Proteobacteria	Gammaproteobacteria	Betaproteobacteriales	Burkholderiaceae	Parasutterella	Burkholderiales_bacterium_YL45
Otu000968	4	0	0	0	0	3	1	0	0	0	0	0	0	0.004628	0.001972	0	0	Bacteria	Firmicutes	Clostridia	Clostridiales	Lachnospiraceae
Otu001023	4	0	4	0	0	0	0	0	0	0	0.005706	0	0	0	0	0	0	Bacteria	Verrucomicrobia	Verrucomicrobiae	Verrucomicrobiales	Akkermansiaceae	Akkermansia	Akkermansia_muciniphila
Otu001138	4	0	2	0	0	1	0	1	0	0	0.002853	0	0	0.001543	0	0.001837	0	Bacteria	Bacteroidetes	Bacteroidia	Bacteroidales	Muribaculaceae
Otu001207	4	0	1	0	0	0	0	0	3	0	0.001426	0	0	0	0	0	0.005688	Bacteria	Bacteroidetes	Bacteroidia	Bacteroidales	Muribaculaceae
Otu001306	4	0	0	0	0	2	0	2	0	0	0	0	0	0.003086	0	0.003673	0	Bacteria	Firmicutes	Clostridia	Clostridiales	Lachnospiraceae	Lachnospiraceae_UCG-001
Otu001314	4	0	0	0	1	0	2	1	0	0	0	0	0.001626	0	0.003944	0.001837	0	Bacteria	Bacteroidetes	Bacteroidia	Bacteroidales	Muribaculaceae
Otu001446	4	0	0	3	0	0	0	0	1	0	0	0.005295	0	0	0	0	0.001896	Bacteria	Firmicutes	Bacilli	Lactobacillales	Lactobacillaceae	Lactobacillus
Otu001469	4	0	0	0	0	0	0	1	3	0	0	0	0	0	0	0.001837	0.005688	Bacteria	Bacteroidetes	Bacteroidia	Bacteroidales	Muribaculaceae
Otu001489	4	0	0	0	0	3	0	0	1	0	0	0	0	0.004628	0	0	0.001896	Bacteria	Bacteroidetes	Bacteroidia	Bacteroidales	Prevotellaceae
Otu001493	4	0	0	0	1	1	0	2	0	0	0	0	0.001626	0.001543	0	0.003673	0	Bacteria	Bacteroidetes	Bacteroidia	Bacteroidales	Muribaculaceae
Otu001514	4	0	4	0	0	0	0	0	0	0	0.005706	0	0	0	0	0	0	Bacteria	Verrucomicrobia	Verrucomicrobiae	Verrucomicrobiales	Akkermansiaceae	Akkermansia	Akkermansia_muciniphila
Otu001524	4	0	4	0	0	0	0	0	0	0	0.005706	0	0	0	0	0	0	Bacteria	Verrucomicrobia	Verrucomicrobiae	Verrucomicrobiales	Akkermansiaceae	Akkermansia	Akkermansia_muciniphila
Otu001542	4	0	4	0	0	0	0	0	0	0	0.005706	0	0	0	0	0	0	Bacteria	Verrucomicrobia	Verrucomicrobiae	Verrucomicrobiales	Akkermansiaceae	Akkermansia	Akkermansia_muciniphila
Otu001551	4	0	0	0	0	0	4	0	0	0	0	0	0	0	0.007889	0	0	Bacteria	Firmicutes	Clostridia	Clostridiales
Otu001553	4	0	0	0	0	1	0	2	1	0	0	0	0	0.001543	0	0.003673	0.001896	Bacteria	Bacteroidetes	Bacteroidia	Bacteroidales	Muribaculaceae
Otu001556	4	0	4	0	0	0	0	0	0	0	0.005706	0	0	0	0	0	0	Bacteria	Verrucomicrobia	Verrucomicrobiae	Verrucomicrobiales	Akkermansiaceae	Akkermansia	Akkermansia_muciniphila
Otu001703	4	0	0	0	0	0	0	0	4	0	0	0	0	0	0	0	0.007584	Bacteria	Bacteroidetes	Bacteroidia	Bacteroidales	Prevotellaceae
Otu001712	4	0	0	0	0	4	0	0	0	0	0	0	0	0.006171	0	0	0	Bacteria	Firmicutes	Clostridia	Clostridiales	Ruminococcaceae	Ruminiclostridium_9
Otu001714	4	0	0	0	0	1	3	0	0	0	0	0	0	0.001543	0.005917	0	0	Bacteria	Firmicutes	Clostridia	Clostridiales	Lachnospiraceae
Otu001726	4	0	0	0	0	1	1	1	1	0	0	0	0	0.001543	0.001972	0.001837	0.001896	Bacteria	Firmicutes	Bacilli	Lactobacillales	Lactobacillaceae	Lactobacillus
Otu001750	4	0	4	0	0	0	0	0	0	0	0.005706	0	0	0	0	0	0	Bacteria	Verrucomicrobia	Verrucomicrobiae	Verrucomicrobiales	Akkermansiaceae	Akkermansia	Akkermansia_muciniphila
Otu001772	4	1	0	0	0	1	0	2	0	0.001792	0	0	0	0.001543	0	0.003673	0	Bacteria	Bacteroidetes	Bacteroidia	Bacteroidales	Muribaculaceae
Otu001806	4	0	0	0	0	1	1	1	1	0	0	0	0	0.001543	0.001972	0.001837	0.001896	Bacteria	Firmicutes	Bacilli	Lactobacillales	Lactobacillaceae	Lactobacillus
Otu001807	4	0	0	0	0	0	2	1	1	0	0	0	0	0	0.003944	0.001837	0.001896	Bacteria	Bacteroidetes	Bacteroidia	Bacteroidales	Muribaculaceae
Otu001826	4	0	0	0	0	0	0	0	4	0	0	0	0	0	0	0	0.007584	Bacteria	Bacteroidetes	Bacteroidia	Bacteroidales
Otu001848	4	0	0	0	0	2	0	0	2	0	0	0	0	0.003086	0	0	0.003792	Bacteria	Firmicutes	Clostridia	Clostridiales	Ruminococcaceae	Anaerotruncus	Anaerotruncus_sp_G32012
Otu001869	4	0	2	0	0	0	0	0	2	0	0.002853	0	0	0	0	0	0.003792	Bacteria	Firmicutes	Clostridia	Clostridiales	Ruminococcaceae
Otu001884	4	0	0	0	0	0	1	0	3	0	0	0	0	0	0.001972	0	0.005688	Bacteria	Firmicutes	Clostridia	Clostridiales	Ruminococcaceae
Otu001891	4	0	0	0	0	2	0	2	0	0	0	0	0	0.003086	0	0.003673	0	Bacteria	Bacteroidetes	Bacteroidia	Bacteroidales	Muribaculaceae
Otu001984	4	0	2	1	1	0	0	0	0	0	0.002853	0.001765	0.001626	0	0	0	0	Bacteria	Proteobacteria	Gammaproteobacteria	Enterobacteriales	Enterobacteriaceae	Providencia
Otu002078	4	0	0	0	0	3	0	0	1	0	0	0	0	0.004628	0	0	0.001896	Bacteria	Bacteroidetes	Bacteroidia	Bacteroidales	Prevotellaceae
Otu002114	4	0	0	0	0	4	0	0	0	0	0	0	0	0.006171	0	0	0	Bacteria	Firmicutes	Clostridia	Clostridiales	Lachnospiraceae
Otu002147	4	0	0	0	0	4	0	0	0	0	0	0	0	0.006171	0	0	0	Bacteria	Bacteroidetes	Bacteroidia	Bacteroidales	Prevotellaceae	Alloprevotella
Otu002267	4	0	0	0	0	1	1	2	0	0	0	0	0	0.001543	0.001972	0.003673	0	Bacteria	Firmicutes	Bacilli	Lactobacillales	Lactobacillaceae	Lactobacillus
Otu002278	4	3	0	0	1	0	0	0	0	0.005377	0	0	0.001626	0	0	0	0	Bacteria	Firmicutes	Bacilli	Lactobacillales	Lactobacillaceae	Lactobacillus
Otu002360	4	1	0	1	1	0	0	0	1	0.001792	0	0.001765	0.001626	0	0	0	0.001896	Bacteria	Firmicutes	Bacilli	Lactobacillales	Lactobacillaceae	Lactobacillus	Lactobacillus_murinus
Otu002365	4	0	0	2	0	0	2	0	0	0	0	0.00353	0	0	0.003944	0	0	Bacteria	Firmicutes	Clostridia	Clostridiales	Clostridiaceae_1	Candidatus_Arthromitus	Candidatus_Arthromitus_sp_SFB-mouse-Japan
Otu002404	4	0	1	0	0	0	0	2	1	0	0.001426	0	0	0	0	0.003673	0.001896	Bacteria	Bacteroidetes	Bacteroidia	Bacteroidales	Muribaculaceae
Otu002451	4	1	0	2	0	0	1	0	0	0.001792	0	0.00353	0	0	0.001972	0	0	Bacteria	Firmicutes	Bacilli	Lactobacillales	Lactobacillaceae	Lactobacillus	Lactobacillus_murinus
Otu002503	4	0	0	3	0	0	1	0	0	0	0	0.005295	0	0	0.001972	0	0	Bacteria	Proteobacteria	Gammaproteobacteria	Betaproteobacteriales	Burkholderiaceae	Delftia	Delftia_tsuruhatensis
Otu002533	4	0	3	0	0	0	0	1	0	0	0.004279	0	0	0	0	0.001837	0	Bacteria	Bacteroidetes	Bacteroidia	Bacteroidales	Muribaculaceae
Otu002550	4	0	0	0	0	3	0	0	1	0	0	0	0	0.004628	0	0	0.001896	Bacteria	Bacteroidetes	Bacteroidia	Bacteroidales	Muribaculaceae
Otu002624	4	0	0	0	0	3	0	0	1	0	0	0	0	0.004628	0	0	0.001896	Bacteria	Firmicutes	Clostridia	Clostridiales	Lachnospiraceae
Otu002627	4	0	0	0	0	1	2	1	0	0	0	0	0	0.001543	0.003944	0.001837	0	Bacteria	Firmicutes	Clostridia	Clostridiales	Lachnospiraceae	Lachnospiraceae_NK4A136_group
Otu002662	4	0	0	0	0	1	0	2	1	0	0	0	0	0.001543	0	0.003673	0.001896	Bacteria	Bacteroidetes	Bacteroidia	Bacteroidales	Muribaculaceae
Otu002664	4	0	0	4	0	0	0	0	0	0	0	0.00706	0	0	0	0	0	Bacteria	Bacteroidetes	Bacteroidia	Bacteroidales	Prevotellaceae	Prevotella_9
Otu002712	4	1	0	1	0	0	2	0	0	0.001792	0	0.001765	0	0	0.003944	0	0	Bacteria	Firmicutes	Bacilli	Lactobacillales	Lactobacillaceae	Lactobacillus	Lactobacillus_murinus
Otu002715	4	0	0	0	0	2	0	1	1	0	0	0	0	0.003086	0	0.001837	0.001896	Bacteria	Bacteroidetes	Bacteroidia	Bacteroidales	Muribaculaceae
Otu002762	4	0	0	1	3	0	0	0	0	0	0	0.001765	0.004879	0	0	0	0	Bacteria	Firmicutes	Bacilli	Lactobacillales	Lactobacillaceae	Lactobacillus
Otu002818	4	0	0	0	0	0	0	0	4	0	0	0	0	0	0	0	0.007584	Bacteria	Bacteroidetes	Bacteroidia	Bacteroidales	Muribaculaceae
Otu002820	4	0	0	0	0	0	0	4	0	0	0	0	0	0	0	0.007347	0	Bacteria	Bacteroidetes	Bacteroidia	Bacteroidales	Muribaculaceae
Otu002862	4	0	0	0	0	2	1	1	0	0	0	0	0	0.003086	0.001972	0.001837	0	Bacteria
Otu002891	4	0	0	0	0	2	0	2	0	0	0	0	0	0.003086	0	0.003673	0	Bacteria	Bacteroidetes	Bacteroidia	Bacteroidales	Muribaculaceae
Otu002912	4	2	0	2	0	0	0	0	0	0.003584	0	0.00353	0	0	0	0	0	Bacteria	Cyanobacteria	Oxyphotobacteria	Chloroplast
Otu002924	4	0	0	0	0	2	2	0	0	0	0	0	0	0.003086	0.003944	0	0	Bacteria	Firmicutes	Clostridia	Clostridiales	Lachnospiraceae
Otu002927	4	0	0	0	0	1	1	2	0	0	0	0	0	0.001543	0.001972	0.003673	0	Bacteria	Bacteroidetes	Bacteroidia	Bacteroidales	Tannerellaceae	Parabacteroides
Otu002940	4	0	0	3	0	0	1	0	0	0	0	0.005295	0	0	0.001972	0	0	Bacteria	Firmicutes	Bacilli	Lactobacillales	Lactobacillaceae	Lactobacillus	Lactobacillus_murinus
Otu002962	4	4	0	0	0	0	0	0	0	0.007169	0	0	0	0	0	0	0	Bacteria	Proteobacteria	Gammaproteobacteria	Alteromonadales	Moritellaceae	Moritella
Otu003024	4	3	0	1	0	0	0	0	0	0.005377	0	0.001765	0	0	0	0	0	Bacteria	Firmicutes	Bacilli	Lactobacillales	Lactobacillaceae	Lactobacillus
Otu003029	4	1	0	1	1	0	0	0	1	0.001792	0	0.001765	0.001626	0	0	0	0.001896	Bacteria	Firmicutes	Bacilli	Lactobacillales	Lactobacillaceae	Lactobacillus	Lactobacillus_murinus
Otu003032	4	0	0	0	4	0	0	0	0	0	0	0	0.006505	0	0	0	0	Bacteria	Proteobacteria	Gammaproteobacteria	Enterobacteriales	Enterobacteriaceae	Serratia
Otu003115	4	0	0	0	0	2	0	0	2	0	0	0	0	0.003086	0	0	0.003792	Bacteria	Bacteroidetes	Bacteroidia	Bacteroidales	Muribaculaceae
Otu003137	4	2	0	0	2	0	0	0	0	0.003584	0	0	0.003252	0	0	0	0	Bacteria	Firmicutes	Bacilli	Lactobacillales	Lactobacillaceae	Lactobacillus	Lactobacillus_murinus
Otu003156	4	0	4	0	0	0	0	0	0	0	0.005706	0	0	0	0	0	0	Bacteria	Bacteroidetes	Bacteroidia	Bacteroidales
Otu003178	4	0	4	0	0	0	0	0	0	0	0.005706	0	0	0	0	0	0	Bacteria	Bacteroidetes	Bacteroidia	Bacteroidales
Otu003184	4	0	0	0	0	0	0	0	4	0	0	0	0	0	0	0	0.007584	Bacteria	Bacteroidetes	Bacteroidia	Bacteroidales
Otu003186	4	0	0	4	0	0	0	0	0	0	0	0.00706	0	0	0	0	0	Bacteria	Actinobacteria	Actinobacteria	Corynebacteriales	Corynebacteriaceae	Corynebacterium_1	Corynebacterium_glutamicum
Otu003215	4	2	0	1	1	0	0	0	0	0.003584	0	0.001765	0.001626	0	0	0	0	Bacteria	Firmicutes	Bacilli	Lactobacillales	Lactobacillaceae	Lactobacillus
Otu003333	4	0	0	0	0	2	0	2	0	0	0	0	0	0.003086	0	0.003673	0	Bacteria	Firmicutes	Bacilli	Lactobacillales	Lactobacillaceae	Lactobacillus
Otu003354	4	0	0	2	0	0	2	0	0	0	0	0.00353	0	0	0.003944	0	0	Bacteria	Firmicutes	Bacilli	Lactobacillales	Lactobacillaceae	Lactobacillus	Lactobacillus_murinus
Otu003377	4	0	0	0	0	2	1	1	0	0	0	0	0	0.003086	0.001972	0.001837	0	Bacteria	Firmicutes	Clostridia	Clostridiales	Lachnospiraceae
Otu003397	4	0	0	1	0	0	3	0	0	0	0	0.001765	0	0	0.005917	0	0	Bacteria	Firmicutes	Bacilli	Lactobacillales	Lactobacillaceae	Lactobacillus	Lactobacillus_murinus
Otu003411	4	0	0	0	0	0	1	0	3	0	0	0	0	0	0.001972	0	0.005688	Bacteria	Actinobacteria	Coriobacteriia	Coriobacteriales	Eggerthellaceae	Enterorhabdus	Enterorhabdus_caecimuris_B7
Otu003442	4	0	0	0	0	0	4	0	0	0	0	0	0	0	0.007889	0	0	Bacteria	Epsilonbacteraeota	Campylobacteria	Campylobacterales	Helicobacteraceae	Helicobacter	Helicobacter_mastomyrinus
Otu003478	4	0	0	0	0	4	0	0	0	0	0	0	0	0.006171	0	0	0	Bacteria	Proteobacteria	Gammaproteobacteria	Xanthomonadales	Xanthomonadaceae	Arenimonas	bacterium_CYCU-0215
Otu003486	4	4	0	0	0	0	0	0	0	0.007169	0	0	0	0	0	0	0	Bacteria	Actinobacteria	Actinobacteria
Otu003518	4	0	0	0	4	0	0	0	0	0	0	0	0.006505	0	0	0	0	Bacteria	Actinobacteria	Actinobacteria	Pseudonocardiales	Pseudonocardiaceae	Saccharopolyspora
Otu003549	4	4	0	0	0	0	0	0	0	0.007169	0	0	0	0	0	0	0	Bacteria	Proteobacteria	Gammaproteobacteria	Methylococcales	Cycloclasticaceae	Cycloclasticus
Otu003562	4	0	0	0	0	2	0	0	2	0	0	0	0	0.003086	0	0	0.003792	Bacteria	Bacteroidetes	Bacteroidia	Bacteroidales	Prevotellaceae
Otu003565	4	0	0	0	4	0	0	0	0	0	0	0	0.006505	0	0	0	0	Bacteria	Proteobacteria	Gammaproteobacteria	Xanthomonadales	Xanthomonadaceae	Luteimonas
Otu003605	4	0	0	0	4	0	0	0	0	0	0	0	0.006505	0	0	0	0	Bacteria	Verrucomicrobia	Verrucomicrobiae	Pedosphaerales	Pedosphaeraceae
Otu003631	4	0	4	0	0	0	0	0	0	0	0.005706	0	0	0	0	0	0	Bacteria	Bacteroidetes	Bacteroidia	Bacteroidales
Otu003672	4	0	0	0	0	1	2	0	1	0	0	0	0	0.001543	0.003944	0	0.001896	Bacteria	Firmicutes	Clostridia	Clostridiales	Lachnospiraceae
Otu003682	4	0	0	0	4	0	0	0	0	0	0	0	0.006505	0	0	0	0	Bacteria	Actinobacteria	Actinobacteria	Propionibacteriales	Nocardioidaceae
Otu003720	4	0	0	0	0	2	0	0	2	0	0	0	0	0.003086	0	0	0.003792	Bacteria	Firmicutes	Clostridia	Clostridiales	Ruminococcaceae
Otu003742	4	0	0	4	0	0	0	0	0	0	0	0.00706	0	0	0	0	0	Bacteria	Bacteroidetes	Bacteroidia	Flavobacteriales	Weeksellaceae	Chryseobacterium
Otu003759	4	0	2	0	0	2	0	0	0	0	0.002853	0	0	0.003086	0	0	0	Bacteria	Bacteroidetes	Bacteroidia	Bacteroidales	Tannerellaceae	Parabacteroides
Otu003767	4	0	4	0	0	0	0	0	0	0	0.005706	0	0	0	0	0	0	Bacteria	Bacteroidetes	Bacteroidia	Bacteroidales	Rikenellaceae	Alistipes
Otu003785	4	0	0	0	0	1	0	0	3	0	0	0	0	0.001543	0	0	0.005688	Bacteria	Bacteroidetes	Bacteroidia	Bacteroidales	Muribaculaceae
Otu003915	4	0	0	0	4	0	0	0	0	0	0	0	0.006505	0	0	0	0	Bacteria	Proteobacteria	Gammaproteobacteria
Otu003925	4	0	0	4	0	0	0	0	0	0	0	0.00706	0	0	0	0	0	Bacteria	Firmicutes	Bacilli	Lactobacillales	Leuconostocaceae	Weissella	Weissella_paramesenteroides
Otu000052	3	0	2	0	1	0	0	0	0	0	0.002853	0	0.001626	0	0	0	0	Bacteria	Firmicutes	Clostridia	Clostridiales	Lachnospiraceae	Lachnospiraceae_NK4A136_group	Clostridiales_bacterium_CIEAF_020
Otu000134	3	0	0	0	1	1	1	0	0	0	0	0	0.001626	0.001543	0.001972	0	0	Bacteria	Firmicutes	Clostridia	Clostridiales	Lachnospiraceae	Eubacterium_xylanophilum_group
Otu000233	3	0	1	0	0	1	0	0	1	0	0.001426	0	0	0.001543	0	0	0.001896	Bacteria	Firmicutes	Clostridia	Clostridiales	Ruminococcaceae	Ruminococcus_1
Otu000237	3	0	1	0	0	1	0	1	0	0	0.001426	0	0	0.001543	0	0.001837	0	Bacteria	Firmicutes	Clostridia	Clostridiales	Lachnospiraceae
Otu000276	3	0	0	0	0	0	0	0	3	0	0	0	0	0	0	0	0.005688	Bacteria	Firmicutes	Clostridia	Clostridiales	Ruminococcaceae	Eubacterium_coprostanoligenes_group
Otu000356	3	0	0	0	0	0	0	0	3	0	0	0	0	0	0	0	0.005688	Bacteria	Bacteroidetes	Bacteroidia	Bacteroidales	Muribaculaceae
Otu000374	3	0	0	0	0	2	0	1	0	0	0	0	0	0.003086	0	0.001837	0	Bacteria	Firmicutes	Clostridia	Clostridiales	Lachnospiraceae	Lachnospiraceae_NK4A136_group	Lachnospiraceae_bacterium_COE1
Otu000377	3	0	0	0	3	0	0	0	0	0	0	0	0.004879	0	0	0	0	Bacteria	Tenericutes	Mollicutes	Anaeroplasmatales	Anaeroplasmataceae	Anaeroplasma
Otu000378	3	0	1	0	2	0	0	0	0	0	0.001426	0	0.003252	0	0	0	0	Bacteria	Bacteroidetes	Bacteroidia	Bacteroidales	Muribaculaceae
Otu000390	3	0	1	0	0	1	0	1	0	0	0.001426	0	0	0.001543	0	0.001837	0	Bacteria	Firmicutes	Clostridia	Clostridiales	Lachnospiraceae
Otu000405	3	1	0	0	0	0	0	2	0	0.001792	0	0	0	0	0	0.003673	0	Bacteria	Planctomycetes	Planctomycetacia	Pirellulales	Pirellulaceae
Otu000412	3	0	0	0	0	0	0	0	3	0	0	0	0	0	0	0	0.005688	Bacteria	Bacteroidetes	Bacteroidia	Bacteroidales	Muribaculaceae
Otu000429	3	0	0	0	0	3	0	0	0	0	0	0	0	0.004628	0	0	0	Bacteria	Bacteroidetes	Bacteroidia	Bacteroidales	Muribaculaceae
Otu000447	3	0	0	0	2	0	0	0	1	0	0	0	0.003252	0	0	0	0.001896	Bacteria	Bacteroidetes	Bacteroidia	Bacteroidales	Muribaculaceae
Otu000472	3	1	0	0	0	0	0	0	2	0.001792	0	0	0	0	0	0	0.003792	Bacteria	Firmicutes	Clostridia	Clostridiales	Ruminococcaceae	Ruminococcaceae_UCG-014
Otu000486	3	0	0	0	0	2	0	0	1	0	0	0	0	0.003086	0	0	0.001896	Bacteria	Firmicutes	Clostridia	Clostridiales	Lachnospiraceae
Otu000490	3	0	0	0	0	1	0	2	0	0	0	0	0	0.001543	0	0.003673	0	Bacteria	Firmicutes	Clostridia	Clostridiales	Ruminococcaceae	Ruminococcus_1
Otu000509	3	0	0	0	0	0	0	0	3	0	0	0	0	0	0	0	0.005688	Bacteria	Firmicutes	Clostridia	Clostridiales	Ruminococcaceae	Ruminococcaceae_UCG-014
Otu000513	3	0	0	0	0	0	0	2	1	0	0	0	0	0	0	0.003673	0.001896	Bacteria	Bacteroidetes	Bacteroidia	Bacteroidales	Muribaculaceae
Otu000518	3	0	1	0	0	0	2	0	0	0	0.001426	0	0	0	0.003944	0	0	Bacteria	Bacteroidetes	Bacteroidia	Bacteroidales	Muribaculaceae
Otu000541	3	0	0	0	0	2	0	0	1	0	0	0	0	0.003086	0	0	0.001896	Bacteria	Firmicutes	Erysipelotrichia	Erysipelotrichales	Erysipelotrichaceae	Dubosiella
Otu000611	3	0	0	0	0	1	2	0	0	0	0	0	0	0.001543	0.003944	0	0	Bacteria	Firmicutes	Clostridia	Clostridiales	Lachnospiraceae
Otu000612	3	0	0	0	0	1	0	2	0	0	0	0	0	0.001543	0	0.003673	0	Bacteria	Firmicutes	Clostridia	Clostridiales	Ruminococcaceae	Ruminococcaceae_UCG-014
Otu000641	3	0	1	0	0	0	0	2	0	0	0.001426	0	0	0	0	0.003673	0	Bacteria	Firmicutes	Bacilli	Bacillales	Planococcaceae	Sporosarcina	Sporosarcina_sp_106
Otu000647	3	0	0	0	0	0	0	3	0	0	0	0	0	0	0	0.00551	0	Bacteria
Otu000657	3	0	0	0	3	0	0	0	0	0	0	0	0.004879	0	0	0	0	Bacteria	Firmicutes	Clostridia	Clostridiales	Defluviitaleaceae	Defluviitaleaceae_UCG-011
Otu000676	3	0	0	0	3	0	0	0	0	0	0	0	0.004879	0	0	0	0	Bacteria	Firmicutes	Erysipelotrichia	Erysipelotrichales	Erysipelotrichaceae	Dubosiella
Otu000680	3	0	0	0	3	0	0	0	0	0	0	0	0.004879	0	0	0	0	Bacteria	Firmicutes	Erysipelotrichia	Erysipelotrichales	Erysipelotrichaceae	Dubosiella
Otu000695	3	0	1	0	0	0	0	1	1	0	0.001426	0	0	0	0	0.001837	0.001896	Bacteria	Bacteroidetes	Bacteroidia	Bacteroidales	Muribaculaceae
Otu000729	3	0	0	0	0	1	2	0	0	0	0	0	0	0.001543	0.003944	0	0	Bacteria	Bacteroidetes	Bacteroidia	Bacteroidales	Muribaculaceae
Otu000746	3	0	0	0	0	0	0	3	0	0	0	0	0	0	0	0.00551	0	Bacteria	Planctomycetes	Planctomycetacia	Gemmatales	Gemmataceae
Otu000798	3	1	0	0	2	0	0	0	0	0.001792	0	0	0.003252	0	0	0	0	Bacteria	Firmicutes	Erysipelotrichia	Erysipelotrichales	Erysipelotrichaceae	Dubosiella
Otu000800	3	0	0	0	3	0	0	0	0	0	0	0	0.004879	0	0	0	0	Bacteria	Firmicutes	Erysipelotrichia	Erysipelotrichales	Erysipelotrichaceae	Dubosiella
Otu000853	3	0	0	0	0	0	1	2	0	0	0	0	0	0	0.001972	0.003673	0	Bacteria	Bacteroidetes	Bacteroidia	Bacteroidales	Muribaculaceae
Otu000980	3	0	0	1	0	0	0	0	2	0	0	0.001765	0	0	0	0	0.003792	Bacteria	Proteobacteria	Gammaproteobacteria	Betaproteobacteriales	Burkholderiaceae	Parasutterella
Otu000992	3	0	0	3	0	0	0	0	0	0	0	0.005295	0	0	0	0	0	Bacteria	Firmicutes	Clostridia	Clostridiales	Lachnospiraceae	Lachnospiraceae_NK4A136_group
Otu000999	3	1	0	0	2	0	0	0	0	0.001792	0	0	0.003252	0	0	0	0	Bacteria	Planctomycetes	Planctomycetacia	Isosphaerales	Isosphaeraceae
Otu001000	3	0	3	0	0	0	0	0	0	0	0.004279	0	0	0	0	0	0	Bacteria	Firmicutes	Clostridia	Clostridiales	Clostridiales_vadinBB60_group
Otu001015	3	0	0	0	0	1	0	2	0	0	0	0	0	0.001543	0	0.003673	0	Bacteria	Firmicutes	Clostridia	Clostridiales	Lachnospiraceae
Otu001029	3	0	0	0	0	1	0	1	1	0	0	0	0	0.001543	0	0.001837	0.001896	Bacteria	Bacteroidetes	Bacteroidia	Bacteroidales	Muribaculaceae
Otu001030	3	0	2	0	0	0	0	0	1	0	0.002853	0	0	0	0	0	0.001896	Bacteria	Bacteroidetes	Bacteroidia	Bacteroidales	Muribaculaceae
Otu001046	3	1	0	2	0	0	0	0	0	0.001792	0	0.00353	0	0	0	0	0	Bacteria	Proteobacteria	Gammaproteobacteria	Pseudomonadales	Moraxellaceae	Acinetobacter
Otu001055	3	1	0	0	2	0	0	0	0	0.001792	0	0	0.003252	0	0	0	0	Bacteria	Firmicutes	Erysipelotrichia	Erysipelotrichales	Erysipelotrichaceae	Dubosiella
Otu001064	3	2	0	0	0	0	0	1	0	0.003584	0	0	0	0	0	0.001837	0	Bacteria	Firmicutes	Bacilli	Bacillales	Planococcaceae	Sporosarcina	Sporosarcina_pasteurii
Otu001072	3	0	0	0	3	0	0	0	0	0	0	0	0.004879	0	0	0	0	Bacteria	Firmicutes	Clostridia	Clostridiales	Lachnospiraceae
Otu001113	3	0	3	0	0	0	0	0	0	0	0.004279	0	0	0	0	0	0	Bacteria	Bacteroidetes	Bacteroidia	Bacteroidales
Otu001116	3	0	0	1	0	0	0	0	2	0	0	0.001765	0	0	0	0	0.003792	Bacteria	Firmicutes	Clostridia	Clostridiales	Lachnospiraceae	Lachnospiraceae_NK4A136_group
Otu001132	3	0	1	0	2	0	0	0	0	0	0.001426	0	0.003252	0	0	0	0	Bacteria	Bacteroidetes	Bacteroidia	Bacteroidales	Muribaculaceae
Otu001176	3	0	0	0	0	0	0	0	3	0	0	0	0	0	0	0	0.005688	Bacteria	Firmicutes	Clostridia	Clostridiales	Clostridiales_vadinBB60_group
Otu001213	3	0	2	1	0	0	0	0	0	0	0.002853	0.001765	0	0	0	0	0	Bacteria	Verrucomicrobia	Verrucomicrobiae	Verrucomicrobiales	Akkermansiaceae	Akkermansia
Otu001243	3	0	0	0	0	1	1	0	1	0	0	0	0	0.001543	0.001972	0	0.001896	Bacteria	Firmicutes	Clostridia	Clostridiales	Lachnospiraceae	Lachnospiraceae_NK4A136_group
Otu001308	3	0	0	0	0	1	1	1	0	0	0	0	0	0.001543	0.001972	0.001837	0	Bacteria	Bacteroidetes	Bacteroidia	Bacteroidales
Otu001364	3	0	3	0	0	0	0	0	0	0	0.004279	0	0	0	0	0	0	Bacteria	Verrucomicrobia	Verrucomicrobiae	Verrucomicrobiales	Akkermansiaceae	Akkermansia	Akkermansia_muciniphila
Otu001367	3	0	1	0	0	1	0	1	0	0	0.001426	0	0	0.001543	0	0.001837	0	Bacteria
Otu001398	3	0	3	0	0	0	0	0	0	0	0.004279	0	0	0	0	0	0	Bacteria	Verrucomicrobia	Verrucomicrobiae	Verrucomicrobiales	Akkermansiaceae	Akkermansia	Akkermansia_muciniphila
Otu001438	3	0	0	0	0	2	0	1	0	0	0	0	0	0.003086	0	0.001837	0	Bacteria	Firmicutes	Clostridia	Clostridiales	Lachnospiraceae	Lachnospiraceae_NK4A136_group
Otu001443	3	0	3	0	0	0	0	0	0	0	0.004279	0	0	0	0	0	0	Bacteria	Verrucomicrobia	Verrucomicrobiae	Verrucomicrobiales	Akkermansiaceae	Akkermansia	Akkermansia_muciniphila
Otu001456	3	0	0	3	0	0	0	0	0	0	0	0.005295	0	0	0	0	0	Bacteria	Actinobacteria	Actinobacteria	Micrococcales	Intrasporangiaceae	Intrasporangium
Otu001484	3	0	3	0	0	0	0	0	0	0	0.004279	0	0	0	0	0	0	Bacteria	Verrucomicrobia	Verrucomicrobiae	Verrucomicrobiales	Akkermansiaceae	Akkermansia	Akkermansia_muciniphila
Otu001501	3	0	1	0	1	0	0	1	0	0	0.001426	0	0.001626	0	0	0.001837	0	Bacteria	Bacteroidetes	Bacteroidia	Bacteroidales	Muribaculaceae
Otu001509	3	0	0	0	0	2	1	0	0	0	0	0	0	0.003086	0.001972	0	0	Bacteria	Firmicutes	Clostridia	Clostridiales
Otu001523	3	0	2	0	1	0	0	0	0	0	0.002853	0	0.001626	0	0	0	0	Bacteria	Verrucomicrobia	Verrucomicrobiae	Verrucomicrobiales	Akkermansiaceae	Akkermansia	Akkermansia_muciniphila
Otu001569	3	0	3	0	0	0	0	0	0	0	0.004279	0	0	0	0	0	0	Bacteria	Bacteroidetes	Bacteroidia	Bacteroidales	Muribaculaceae
Otu001596	3	0	0	0	0	1	0	0	2	0	0	0	0	0.001543	0	0	0.003792	Bacteria	Firmicutes	Erysipelotrichia	Erysipelotrichales	Erysipelotrichaceae
Otu001614	3	0	2	0	0	0	0	0	1	0	0.002853	0	0	0	0	0	0.001896	Bacteria	Bacteroidetes	Bacteroidia	Bacteroidales	Bacteroidaceae	Bacteroides
Otu001661	3	0	2	0	1	0	0	0	0	0	0.002853	0	0.001626	0	0	0	0	Bacteria	Verrucomicrobia	Verrucomicrobiae	Verrucomicrobiales	Akkermansiaceae	Akkermansia
Otu001671	3	0	0	0	0	2	0	1	0	0	0	0	0	0.003086	0	0.001837	0	Bacteria	Bacteroidetes	Bacteroidia	Bacteroidales	Muribaculaceae
Otu001739	3	0	3	0	0	0	0	0	0	0	0.004279	0	0	0	0	0	0	Bacteria	Verrucomicrobia	Verrucomicrobiae	Verrucomicrobiales	Akkermansiaceae	Akkermansia	Akkermansia_muciniphila
Otu001765	3	0	0	0	0	0	3	0	0	0	0	0	0	0	0.005917	0	0	Bacteria	Firmicutes	Bacilli	Lactobacillales	Lactobacillaceae	Lactobacillus
Otu001829	3	0	0	0	0	3	0	0	0	0	0	0	0	0.004628	0	0	0	Bacteria	Firmicutes	Clostridia	Clostridiales
Otu001862	3	0	0	0	3	0	0	0	0	0	0	0	0.004879	0	0	0	0	Bacteria	Firmicutes	Erysipelotrichia	Erysipelotrichales	Erysipelotrichaceae
Otu001864	3	1	0	0	1	0	0	0	1	0.001792	0	0	0.001626	0	0	0	0.001896	Bacteria	Proteobacteria	Gammaproteobacteria	Xanthomonadales	Xanthomonadaceae	Stenotrophomonas
Otu001870	3	0	0	0	3	0	0	0	0	0	0	0	0.004879	0	0	0	0	Bacteria	Firmicutes	Erysipelotrichia	Erysipelotrichales	Erysipelotrichaceae	Dubosiella
Otu001945	3	1	2	0	0	0	0	0	0	0.001792	0.002853	0	0	0	0	0	0	Bacteria	Bacteroidetes	Bacteroidia	Bacteroidales	Muribaculaceae
Otu001964	3	0	2	0	1	0	0	0	0	0	0.002853	0	0.001626	0	0	0	0	Bacteria	Verrucomicrobia	Verrucomicrobiae	Verrucomicrobiales	Akkermansiaceae	Akkermansia	Akkermansia_muciniphila
Otu002071	3	0	2	1	0	0	0	0	0	0	0.002853	0.001765	0	0	0	0	0	Bacteria	Verrucomicrobia	Verrucomicrobiae	Verrucomicrobiales	Akkermansiaceae	Akkermansia
Otu002079	3	0	0	0	0	0	0	1	2	0	0	0	0	0	0	0.001837	0.003792	Bacteria	Firmicutes	Clostridia	Clostridiales	Peptococcaceae
Otu002091	3	0	0	1	0	0	0	0	2	0	0	0.001765	0	0	0	0	0.003792	Bacteria	Bacteroidetes	Bacteroidia	Bacteroidales	Muribaculaceae
Otu002120	3	0	3	0	0	0	0	0	0	0	0.004279	0	0	0	0	0	0	Bacteria	Verrucomicrobia	Verrucomicrobiae	Verrucomicrobiales	Akkermansiaceae	Akkermansia	Akkermansia_muciniphila
Otu002228	3	0	3	0	0	0	0	0	0	0	0.004279	0	0	0	0	0	0	Bacteria	Verrucomicrobia	Verrucomicrobiae	Verrucomicrobiales	Akkermansiaceae	Akkermansia	Akkermansia_muciniphila
Otu002232	3	0	1	0	0	1	0	0	1	0	0.001426	0	0	0.001543	0	0	0.001896	Bacteria	Bacteroidetes	Bacteroidia	Bacteroidales
Otu002305	3	0	0	0	0	0	0	2	1	0	0	0	0	0	0	0.003673	0.001896	Bacteria	Bacteroidetes	Bacteroidia	Bacteroidales	Muribaculaceae
Otu002416	3	0	0	2	0	0	1	0	0	0	0	0.00353	0	0	0.001972	0	0	Bacteria	Firmicutes	Bacilli	Lactobacillales	Lactobacillaceae	Lactobacillus	Lactobacillus_murinus
Otu002422	3	0	1	0	0	0	2	0	0	0	0.001426	0	0	0	0.003944	0	0	Bacteria	Firmicutes	Clostridia	Clostridiales	Ruminococcaceae	Ruminiclostridium_9
Otu002461	3	0	0	0	0	1	0	1	1	0	0	0	0	0.001543	0	0.001837	0.001896	Bacteria	Bacteroidetes	Bacteroidia	Bacteroidales	Muribaculaceae
Otu002479	3	1	0	1	0	0	1	0	0	0.001792	0	0.001765	0	0	0.001972	0	0	Bacteria	Firmicutes	Bacilli	Lactobacillales	Lactobacillaceae	Lactobacillus
Otu002495	3	0	0	0	0	1	0	0	2	0	0	0	0	0.001543	0	0	0.003792	Bacteria	Bacteroidetes	Bacteroidia	Bacteroidales	Muribaculaceae
Otu002501	3	1	0	0	2	0	0	0	0	0.001792	0	0	0.003252	0	0	0	0	Bacteria	Firmicutes	Bacilli	Lactobacillales	Lactobacillaceae	Lactobacillus	Lactobacillus_murinus
Otu002560	3	1	0	1	0	0	1	0	0	0.001792	0	0.001765	0	0	0.001972	0	0	Bacteria	Firmicutes	Bacilli	Lactobacillales	Lactobacillaceae	Lactobacillus	Lactobacillus_murinus
Otu002596	3	0	0	0	0	0	0	1	2	0	0	0	0	0	0	0.001837	0.003792	Bacteria	Bacteroidetes	Bacteroidia	Bacteroidales	Muribaculaceae
Otu002641	3	0	0	0	0	1	0	2	0	0	0	0	0	0.001543	0	0.003673	0	Bacteria	Firmicutes	Clostridia	Clostridiales	Lachnospiraceae
Otu002669	3	0	0	0	0	2	0	0	1	0	0	0	0	0.003086	0	0	0.001896	Bacteria	Bacteroidetes	Bacteroidia	Bacteroidales	Prevotellaceae	Alloprevotella
Otu002679	3	0	0	0	0	0	0	3	0	0	0	0	0	0	0	0.00551	0	Bacteria	Bacteroidetes	Bacteroidia	Bacteroidales	Muribaculaceae
Otu002690	3	0	0	0	0	0	0	0	3	0	0	0	0	0	0	0	0.005688	Bacteria	Bacteroidetes	Bacteroidia	Bacteroidales	Prevotellaceae
Otu002718	3	0	3	0	0	0	0	0	0	0	0.004279	0	0	0	0	0	0	Bacteria	Bacteroidetes	Bacteroidia	Bacteroidales	Rikenellaceae	Alistipes
Otu002752	3	0	3	0	0	0	0	0	0	0	0.004279	0	0	0	0	0	0	Bacteria	Firmicutes	Clostridia	Clostridiales	Ruminococcaceae	Oscillibacter
Otu002766	3	0	0	3	0	0	0	0	0	0	0	0.005295	0	0	0	0	0	Bacteria	Firmicutes	Bacilli	Lactobacillales	Streptococcaceae	Streptococcus	Streptococcus_danieliae
Otu002852	3	1	0	0	2	0	0	0	0	0.001792	0	0	0.003252	0	0	0	0	Bacteria	Firmicutes	Bacilli	Lactobacillales	Lactobacillaceae	Lactobacillus
Otu002872	3	0	0	0	0	2	0	1	0	0	0	0	0	0.003086	0	0.001837	0	Bacteria	Firmicutes	Clostridia	Clostridiales	Lachnospiraceae
Otu002887	3	0	0	0	0	0	0	0	3	0	0	0	0	0	0	0	0.005688	Bacteria	Bacteroidetes	Bacteroidia	Bacteroidales	Prevotellaceae
Otu002910	3	0	0	0	0	0	0	0	3	0	0	0	0	0	0	0	0.005688	Bacteria	Bacteroidetes	Bacteroidia	Bacteroidales	Prevotellaceae	Alloprevotella
Otu002936	3	0	0	0	0	0	3	0	0	0	0	0	0	0	0.005917	0	0	Bacteria	Firmicutes	Bacilli	Lactobacillales	Lactobacillaceae	Lactobacillus
Otu002973	3	0	0	0	0	0	0	2	1	0	0	0	0	0	0	0.003673	0.001896	Bacteria	Bacteroidetes	Bacteroidia	Bacteroidales	Muribaculaceae
Otu002980	3	3	0	0	0	0	0	0	0	0.005377	0	0	0	0	0	0	0	Bacteria	Firmicutes	Bacilli	Lactobacillales	Lactobacillaceae	Lactobacillus
Otu003009	3	0	0	0	0	0	0	0	3	0	0	0	0	0	0	0	0.005688	Bacteria	Firmicutes	Clostridia	Clostridiales	Ruminococcaceae
Otu003100	3	0	3	0	0	0	0	0	0	0	0.004279	0	0	0	0	0	0	Bacteria	Firmicutes	Clostridia	Clostridiales	Ruminococcaceae	Ruminiclostridium_9	Clostridiales_bacterium_CIEAF_019
Otu003128	3	0	0	0	0	2	0	0	1	0	0	0	0	0.003086	0	0	0.001896	Bacteria	Firmicutes	Clostridia	Clostridiales	Ruminococcaceae
Otu003138	3	0	0	0	0	1	0	2	0	0	0	0	0	0.001543	0	0.003673	0	Bacteria	Bacteroidetes	Bacteroidia	Bacteroidales	Muribaculaceae
Otu003151	3	1	0	0	1	1	0	0	0	0.001792	0	0	0.001626	0.001543	0	0	0	Bacteria	Firmicutes	Bacilli	Lactobacillales	Lactobacillaceae	Lactobacillus
Otu003161	3	0	0	1	1	1	0	0	0	0	0	0.001765	0.001626	0.001543	0	0	0	Bacteria	Firmicutes	Bacilli	Lactobacillales	Lactobacillaceae	Lactobacillus
Otu003190	3	1	0	0	1	0	1	0	0	0.001792	0	0	0.001626	0	0.001972	0	0	Bacteria	Firmicutes	Bacilli	Lactobacillales	Lactobacillaceae	Lactobacillus	Lactobacillus_murinus
Otu003224	3	0	0	1	1	0	1	0	0	0	0	0.001765	0.001626	0	0.001972	0	0	Bacteria	Firmicutes	Bacilli	Lactobacillales	Lactobacillaceae	Lactobacillus	Lactobacillus_murinus
Otu003229	3	0	0	0	0	3	0	0	0	0	0	0	0	0.004628	0	0	0	Bacteria	Bacteroidetes	Bacteroidia	Bacteroidales	Muribaculaceae
Otu003239	3	1	0	1	1	0	0	0	0	0.001792	0	0.001765	0.001626	0	0	0	0	Bacteria	Firmicutes	Bacilli	Lactobacillales	Lactobacillaceae	Lactobacillus	Lactobacillus_murinus
Otu003243	3	0	3	0	0	0	0	0	0	0	0.004279	0	0	0	0	0	0	Bacteria	Verrucomicrobia	Verrucomicrobiae	Verrucomicrobiales	Akkermansiaceae	Akkermansia	Akkermansia_muciniphila
Otu003246	3	0	3	0	0	0	0	0	0	0	0.004279	0	0	0	0	0	0	Bacteria	Proteobacteria	Alphaproteobacteria	Rhizobiales	Beijerinckiaceae	Methylobacterium
Otu003248	3	0	0	0	0	2	0	0	1	0	0	0	0	0.003086	0	0	0.001896	Bacteria	Bacteroidetes	Bacteroidia	Bacteroidales	Muribaculaceae
Otu003250	3	0	0	0	3	0	0	0	0	0	0	0	0.004879	0	0	0	0	Bacteria	Proteobacteria	Alphaproteobacteria	Caulobacterales	Caulobacteraceae	Caulobacter
Otu003268	3	3	0	0	0	0	0	0	0	0.005377	0	0	0	0	0	0	0	Bacteria	Firmicutes	Bacilli	Lactobacillales	Lactobacillaceae	Lactobacillus	Lactobacillus_murinus
Otu003287	3	2	0	0	1	0	0	0	0	0.003584	0	0	0.001626	0	0	0	0	Bacteria	Firmicutes	Bacilli	Lactobacillales	Lactobacillaceae	Lactobacillus	Lactobacillus_murinus
Otu003290	3	0	0	0	0	2	1	0	0	0	0	0	0	0.003086	0.001972	0	0	Bacteria	Firmicutes	Clostridia	Clostridiales
Otu003309	3	0	0	1	1	0	1	0	0	0	0	0.001765	0.001626	0	0.001972	0	0	Bacteria	Firmicutes	Bacilli	Lactobacillales	Lactobacillaceae	Lactobacillus	Lactobacillus_murinus
Otu003312	3	0	2	0	0	0	0	1	0	0	0.002853	0	0	0	0	0.001837	0	Bacteria	Bacteroidetes	Bacteroidia	Bacteroidales	Tannerellaceae	Parabacteroides
Otu003317	3	0	0	0	3	0	0	0	0	0	0	0	0.004879	0	0	0	0	Bacteria	Firmicutes	Bacilli	Lactobacillales	Lactobacillaceae	Lactobacillus
Otu003320	3	0	0	0	0	0	0	2	1	0	0	0	0	0	0	0.003673	0.001896	Bacteria	Bacteroidetes	Bacteroidia	Bacteroidales	Muribaculaceae
Otu003328	3	0	2	0	0	0	0	0	1	0	0.002853	0	0	0	0	0	0.001896	Bacteria	Verrucomicrobia	Verrucomicrobiae	Verrucomicrobiales	Akkermansiaceae	Akkermansia
Otu003346	3	0	0	0	0	0	0	0	3	0	0	0	0	0	0	0	0.005688	Bacteria	Firmicutes	Clostridia	Clostridiales
Otu003375	3	0	0	0	0	1	0	1	1	0	0	0	0	0.001543	0	0.001837	0.001896	Bacteria	Bacteroidetes	Bacteroidia	Bacteroidales	Muribaculaceae
Otu003376	3	2	0	0	0	0	0	0	1	0.003584	0	0	0	0	0	0	0.001896	Bacteria	Firmicutes	Bacilli	Lactobacillales	Lactobacillaceae	Lactobacillus
Otu003380	3	0	0	0	0	2	1	0	0	0	0	0	0	0.003086	0.001972	0	0	Bacteria	Firmicutes	Bacilli	Lactobacillales	Lactobacillaceae	Lactobacillus
Otu003429	3	0	0	0	0	1	0	1	1	0	0	0	0	0.001543	0	0.001837	0.001896	Bacteria	Bacteroidetes	Bacteroidia	Bacteroidales	Muribaculaceae
Otu003432	3	1	0	1	1	0	0	0	0	0.001792	0	0.001765	0.001626	0	0	0	0	Bacteria	Firmicutes	Bacilli	Lactobacillales	Lactobacillaceae	Lactobacillus	Lactobacillus_murinus
Otu003461	3	0	0	0	2	0	1	0	0	0	0	0	0.003252	0	0.001972	0	0	Bacteria	Firmicutes	Bacilli	Lactobacillales	Lactobacillaceae	Lactobacillus
Otu003467	3	0	0	2	0	0	1	0	0	0	0	0.00353	0	0	0.001972	0	0	Bacteria	Firmicutes	Bacilli	Lactobacillales	Lactobacillaceae	Lactobacillus	Lactobacillus_murinus
Otu003504	3	0	0	0	0	2	0	0	1	0	0	0	0	0.003086	0	0	0.001896	Bacteria	Bacteroidetes	Bacteroidia	Bacteroidales	Prevotellaceae	Alloprevotella
Otu003676	3	0	0	0	0	0	3	0	0	0	0	0	0	0	0.005917	0	0	Bacteria	Firmicutes	Clostridia	Clostridiales
Otu003703	3	0	0	0	0	2	0	1	0	0	0	0	0	0.003086	0	0.001837	0	Bacteria	Firmicutes	Clostridia	Clostridiales	Lachnospiraceae	Lachnospiraceae_NK4A136_group
Otu003714	3	0	0	3	0	0	0	0	0	0	0	0.005295	0	0	0	0	0	Bacteria	Firmicutes	Bacilli	Lactobacillales	Lactobacillaceae	Lactobacillus	Lactobacillus_murinus
Otu003726	3	0	0	0	0	2	0	1	0	0	0	0	0	0.003086	0	0.001837	0	Bacteria	Firmicutes	Clostridia	Clostridiales
Otu003729	3	1	0	0	2	0	0	0	0	0.001792	0	0	0.003252	0	0	0	0	Bacteria	Firmicutes	Bacilli	Lactobacillales	Lactobacillaceae	Lactobacillus
Otu003730	3	0	0	0	0	0	0	0	3	0	0	0	0	0	0	0	0.005688	Bacteria	Bacteroidetes	Bacteroidia	Bacteroidales	Muribaculaceae
Otu003764	3	0	0	0	0	0	0	1	2	0	0	0	0	0	0	0.001837	0.003792	Bacteria	Bacteroidetes	Bacteroidia	Bacteroidales	Prevotellaceae
Otu003784	3	0	3	0	0	0	0	0	0	0	0.004279	0	0	0	0	0	0	Bacteria	Bacteroidetes	Bacteroidia	Bacteroidales	Bacteroidaceae	Bacteroides
Otu003802	3	0	0	0	1	0	2	0	0	0	0	0	0.001626	0	0.003944	0	0	Bacteria	Firmicutes	Bacilli	Lactobacillales	Lactobacillaceae	Lactobacillus
Otu003806	3	1	0	2	0	0	0	0	0	0.001792	0	0.00353	0	0	0	0	0	Bacteria	Firmicutes	Bacilli	Lactobacillales	Lactobacillaceae	Lactobacillus	Lactobacillus_murinus
Otu003832	3	0	0	0	0	1	0	0	2	0	0	0	0	0.001543	0	0	0.003792	Bacteria	Bacteroidetes	Bacteroidia	Bacteroidales	Prevotellaceae	Alloprevotella
Otu003888	3	1	0	2	0	0	0	0	0	0.001792	0	0.00353	0	0	0	0	0	Bacteria	Firmicutes	Bacilli	Lactobacillales	Lactobacillaceae	Lactobacillus	Lactobacillus_murinus
Otu003893	3	1	0	2	0	0	0	0	0	0.001792	0	0.00353	0	0	0	0	0	Bacteria	Firmicutes	Bacilli	Lactobacillales	Lactobacillaceae	Lactobacillus	Lactobacillus_murinus
Otu003900	3	0	0	1	2	0	0	0	0	0	0	0.001765	0.003252	0	0	0	0	Bacteria	Firmicutes	Bacilli	Lactobacillales	Lactobacillaceae	Lactobacillus	Lactobacillus_salivarius
Otu003928	3	0	0	2	0	0	1	0	0	0	0	0.00353	0	0	0.001972	0	0	Bacteria	Firmicutes	Bacilli	Lactobacillales	Lactobacillaceae	Lactobacillus	Lactobacillus_murinus
Otu003936	3	2	0	0	1	0	0	0	0	0.003584	0	0	0.001626	0	0	0	0	Bacteria	Firmicutes	Bacilli	Lactobacillales	Streptococcaceae	Streptococcus	Streptococcus_danieliae
Otu003974	3	3	0	0	0	0	0	0	0	0.005377	0	0	0	0	0	0	0	Bacteria	Firmicutes	Clostridia	Clostridiales
Otu003994	3	0	0	0	0	1	0	1	1	0	0	0	0	0.001543	0	0.001837	0.001896	Bacteria	Bacteroidetes	Bacteroidia	Bacteroidales	Prevotellaceae
Otu004003	3	0	0	0	0	0	3	0	0	0	0	0	0	0	0.005917	0	0	Bacteria	Firmicutes	Clostridia	Clostridiales	Lachnospiraceae
Otu004015	3	1	0	2	0	0	0	0	0	0.001792	0	0.00353	0	0	0	0	0	Bacteria	Firmicutes	Bacilli	Lactobacillales	Lactobacillaceae	Lactobacillus
Otu004038	3	0	0	0	0	0	0	0	3	0	0	0	0	0	0	0	0.005688	Bacteria	Acidobacteria	Acidobacteriia	Subgroup_2
Otu004047	3	0	0	0	0	0	1	2	0	0	0	0	0	0	0.001972	0.003673	0	Bacteria	Firmicutes	Clostridia	Clostridiales	Lachnospiraceae
Otu004056	3	0	0	0	0	2	1	0	0	0	0	0	0	0.003086	0.001972	0	0	Bacteria	Firmicutes	Clostridia	Clostridiales	Lachnospiraceae
Otu004096	3	0	0	0	0	3	0	0	0	0	0	0	0	0.004628	0	0	0	Bacteria	Firmicutes	Clostridia	Clostridiales	Lachnospiraceae
Otu004105	3	0	0	0	0	2	0	0	1	0	0	0	0	0.003086	0	0	0.001896	Bacteria	Bacteroidetes	Bacteroidia	Bacteroidales	Muribaculaceae
Otu004114	3	1	0	0	2	0	0	0	0	0.001792	0	0	0.003252	0	0	0	0	Bacteria	Firmicutes	Bacilli	Lactobacillales	Lactobacillaceae	Lactobacillus
Otu004115	3	0	3	0	0	0	0	0	0	0	0.004279	0	0	0	0	0	0	Bacteria	Bacteroidetes	Bacteroidia	Bacteroidales	Tannerellaceae	Parabacteroides
Otu004117	3	0	0	0	3	0	0	0	0	0	0	0	0.004879	0	0	0	0	Bacteria	Proteobacteria	Alphaproteobacteria	Rhizobiales	Rhizobiaceae
Otu004118	3	0	3	0	0	0	0	0	0	0	0.004279	0	0	0	0	0	0	Bacteria	Bacteroidetes	Bacteroidia	Bacteroidales
Otu004144	3	0	0	2	1	0	0	0	0	0	0	0.00353	0.001626	0	0	0	0	Bacteria	Firmicutes	Bacilli	Lactobacillales	Streptococcaceae	Streptococcus	Streptococcus_danieliae
Otu004159	3	0	0	0	0	0	0	0	3	0	0	0	0	0	0	0	0.005688	Bacteria	Bacteroidetes	Bacteroidia	Bacteroidales	Muribaculaceae
Otu004161	3	0	0	0	3	0	0	0	0	0	0	0	0.004879	0	0	0	0	Bacteria	Proteobacteria	Alphaproteobacteria	Rhizobiales	Rhizobiaceae
Otu004190	3	0	0	0	0	0	0	3	0	0	0	0	0	0	0	0.00551	0	Bacteria	Bacteroidetes	Bacteroidia	Bacteroidales	Muribaculaceae
Otu004231	3	0	0	0	0	1	0	2	0	0	0	0	0	0.001543	0	0.003673	0	Bacteria	Bacteroidetes	Bacteroidia	Bacteroidales	Muribaculaceae
Otu004244	3	0	0	3	0	0	0	0	0	0	0	0.005295	0	0	0	0	0	Bacteria	Firmicutes	Bacilli	Lactobacillales	Lactobacillaceae	Lactobacillus	Lactobacillus_murinus
Otu004331	3	0	0	0	0	1	0	2	0	0	0	0	0	0.001543	0	0.003673	0	Bacteria	Firmicutes	Clostridia	Clostridiales	Lachnospiraceae
Otu004375	3	0	0	3	0	0	0	0	0	0	0	0.005295	0	0	0	0	0	Bacteria	Firmicutes	Bacilli	Lactobacillales	Streptococcaceae	Streptococcus	Streptococcus_gallolyticus_subsp_macedonicus
Otu004511	3	2	0	0	1	0	0	0	0	0.003584	0	0	0.001626	0	0	0	0	Bacteria	Firmicutes	Bacilli	Lactobacillales	Lactobacillaceae	Lactobacillus	Lactobacillus_gasseri
Otu004524	3	0	0	0	0	2	1	0	0	0	0	0	0	0.003086	0.001972	0	0	Bacteria	Firmicutes	Clostridia	Clostridiales	Lachnospiraceae
Otu004525	3	3	0	0	0	0	0	0	0	0.005377	0	0	0	0	0	0	0	Bacteria	Verrucomicrobia	Verrucomicrobiae	Verrucomicrobiales	Verrucomicrobiaceae	Brevifollis
Otu004530	3	0	0	0	0	0	0	1	2	0	0	0	0	0	0	0.001837	0.003792	Bacteria	Bacteroidetes	Bacteroidia	Bacteroidales	Prevotellaceae	Alloprevotella
Otu004535	3	0	0	1	2	0	0	0	0	0	0	0.001765	0.003252	0	0	0	0	Bacteria	Firmicutes	Bacilli	Lactobacillales	Lactobacillaceae	Lactobacillus	Lactobacillus_murinus
Otu004542	3	0	0	0	0	2	0	0	1	0	0	0	0	0.003086	0	0	0.001896	Bacteria	Bacteroidetes	Bacteroidia	Bacteroidales	Muribaculaceae
Otu004575	3	0	0	0	0	3	0	0	0	0	0	0	0	0.004628	0	0	0	Bacteria	Actinobacteria	Actinobacteria	Pseudonocardiales	Pseudonocardiaceae	Actinomycetospora
Otu004629	3	0	0	0	0	1	0	2	0	0	0	0	0	0.001543	0	0.003673	0	Bacteria	Firmicutes	Clostridia	Clostridiales	Lachnospiraceae	Lachnospiraceae_NK4A136_group
Otu004649	3	0	0	2	1	0	0	0	0	0	0	0.00353	0.001626	0	0	0	0	Bacteria	Cyanobacteria	Oxyphotobacteria	Chloroplast
Otu004656	3	0	0	0	0	1	0	2	0	0	0	0	0	0.001543	0	0.003673	0	Bacteria	Bacteroidetes	Bacteroidia	Bacteroidales	Muribaculaceae
Otu004661	3	0	0	0	2	0	1	0	0	0	0	0	0.003252	0	0.001972	0	0	Bacteria	Firmicutes	Bacilli	Lactobacillales	Lactobacillaceae	Lactobacillus	Lactobacillus_murinus
Otu004672	3	3	0	0	0	0	0	0	0	0.005377	0	0	0	0	0	0	0	Bacteria	Acidobacteria	Acidobacteriia	Solibacterales	Solibacteraceae_Subgroup_3	Candidatus_Solibacter
Otu004688	3	0	0	1	0	1	0	1	0	0	0	0.001765	0	0.001543	0	0.001837	0	Bacteria	Bacteroidetes	Bacteroidia	Bacteroidales	Muribaculaceae
Otu004767	3	0	0	0	0	0	0	0	3	0	0	0	0	0	0	0	0.005688	Bacteria
Otu000126	2	1	1	0	0	0	0	0	0	0.001792	0.001426	0	0	0	0	0	0	Bacteria	Firmicutes	Clostridia	Clostridiales	Lachnospiraceae
Otu000168	2	1	1	0	0	0	0	0	0	0.001792	0.001426	0	0	0	0	0	0	Bacteria	Firmicutes	Clostridia	Clostridiales	Lachnospiraceae
Otu000193	2	1	0	1	0	0	0	0	0	0.001792	0	0.001765	0	0	0	0	0	Bacteria	Actinobacteria	Actinobacteria	Corynebacteriales	Corynebacteriaceae	Corynebacterium_1
Otu000196	2	0	0	0	2	0	0	0	0	0	0	0	0.003252	0	0	0	0	Bacteria	Firmicutes	Clostridia	Clostridiales	Ruminococcaceae	Ruminococcus_1
Otu000204	2	0	0	0	2	0	0	0	0	0	0	0	0.003252	0	0	0	0	Bacteria	Bacteroidetes	Bacteroidia	Bacteroidales	Marinifilaceae	Odoribacter
Otu000255	2	0	0	0	2	0	0	0	0	0	0	0	0.003252	0	0	0	0	Bacteria	Bacteroidetes	Bacteroidia	Bacteroidales	Bacteroidaceae	Bacteroides
Otu000278	2	0	0	0	0	1	0	1	0	0	0	0	0	0.001543	0	0.001837	0	Bacteria	Actinobacteria	Actinobacteria	Frankiales	Acidothermaceae	Acidothermus
Otu000319	2	0	0	0	0	1	0	0	1	0	0	0	0	0.001543	0	0	0.001896	Bacteria	Bacteroidetes	Bacteroidia	Bacteroidales	Muribaculaceae
Otu000340	2	1	0	0	0	0	0	1	0	0.001792	0	0	0	0	0	0.001837	0	Bacteria
Otu000368	2	0	0	2	0	0	0	0	0	0	0	0.00353	0	0	0	0	0	Bacteria	Firmicutes	Clostridia	Clostridiales	Lachnospiraceae	Lachnospiraceae_NK4A136_group
Otu000372	2	0	0	2	0	0	0	0	0	0	0	0.00353	0	0	0	0	0	Bacteria	Bacteroidetes	Bacteroidia	Bacteroidales	Muribaculaceae
Otu000375	2	0	0	0	2	0	0	0	0	0	0	0	0.003252	0	0	0	0	Bacteria	Bacteroidetes	Bacteroidia	Bacteroidales	Muribaculaceae
Otu000381	2	0	1	0	0	1	0	0	0	0	0.001426	0	0	0.001543	0	0	0	Bacteria	Bacteroidetes	Bacteroidia	Bacteroidales	Muribaculaceae
Otu000392	2	0	0	0	0	0	0	0	2	0	0	0	0	0	0	0	0.003792	Bacteria	Bacteroidetes	Bacteroidia	Bacteroidales	Muribaculaceae
Otu000397	2	0	1	0	1	0	0	0	0	0	0.001426	0	0.001626	0	0	0	0	Bacteria	Bacteroidetes	Bacteroidia	Bacteroidales	Muribaculaceae
Otu000419	2	0	1	0	0	0	0	0	1	0	0.001426	0	0	0	0	0	0.001896	Bacteria	Bacteroidetes	Bacteroidia	Bacteroidales	Muribaculaceae
Otu000423	2	0	0	0	2	0	0	0	0	0	0	0	0.003252	0	0	0	0	Bacteria	Firmicutes	Clostridia	Clostridiales	Lachnospiraceae
Otu000427	2	1	0	0	0	0	0	0	1	0.001792	0	0	0	0	0	0	0.001896	Bacteria	Actinobacteria	Acidimicrobiia
Otu000428	2	0	0	0	0	0	0	2	0	0	0	0	0	0	0	0.003673	0	Bacteria	Acidobacteria	Acidobacteriia	Subgroup_2
Otu000434	2	0	0	0	0	2	0	0	0	0	0	0	0	0.003086	0	0	0	Bacteria	Bacteroidetes	Bacteroidia	Bacteroidales	Muribaculaceae
Otu000437	2	0	0	2	0	0	0	0	0	0	0	0.00353	0	0	0	0	0	Bacteria	Firmicutes	Clostridia	Clostridiales	Ruminococcaceae
Otu000438	2	1	0	1	0	0	0	0	0	0.001792	0	0.001765	0	0	0	0	0	Bacteria	Firmicutes	Erysipelotrichia	Erysipelotrichales	Erysipelotrichaceae	Erysipelatoclostridium
Otu000463	2	0	0	0	2	0	0	0	0	0	0	0	0.003252	0	0	0	0	Bacteria	Bacteroidetes	Bacteroidia	Bacteroidales	Muribaculaceae
Otu000504	2	0	0	0	2	0	0	0	0	0	0	0	0.003252	0	0	0	0	Bacteria	Firmicutes	Clostridia	Clostridiales	Lachnospiraceae
Otu000515	2	0	1	0	0	1	0	0	0	0	0.001426	0	0	0.001543	0	0	0	Bacteria	Bacteroidetes	Bacteroidia	Bacteroidales	Muribaculaceae
Otu000519	2	0	1	0	0	1	0	0	0	0	0.001426	0	0	0.001543	0	0	0	Bacteria	Firmicutes	Clostridia	Clostridiales	Ruminococcaceae
Otu000520	2	0	0	0	1	0	0	0	1	0	0	0	0.001626	0	0	0	0.001896	Bacteria	Bacteroidetes	Bacteroidia	Bacteroidales	Muribaculaceae
Otu000522	2	0	0	0	0	0	0	2	0	0	0	0	0	0	0	0.003673	0	Bacteria	Chloroflexi	Ktedonobacteria	Ktedonobacterales	JG30-KF-AS9
Otu000531	2	0	0	0	2	0	0	0	0	0	0	0	0.003252	0	0	0	0	Bacteria	Firmicutes	Erysipelotrichia	Erysipelotrichales	Erysipelotrichaceae	Dubosiella
Otu000539	2	0	0	2	0	0	0	0	0	0	0	0.00353	0	0	0	0	0	Bacteria	Bacteroidetes	Bacteroidia	Bacteroidales	Prevotellaceae
Otu000565	2	0	0	1	1	0	0	0	0	0	0	0.001765	0.001626	0	0	0	0	Bacteria	Acidobacteria	Acidobacteriia	Subgroup_2
Otu000573	2	1	0	0	0	0	0	1	0	0.001792	0	0	0	0	0	0.001837	0	Bacteria	Chloroflexi	AD3
Otu000587	2	2	0	0	0	0	0	0	0	0.003584	0	0	0	0	0	0	0	Bacteria	Acidobacteria	Acidobacteriia	Solibacterales	Solibacteraceae_Subgroup_3	Bryobacter
Otu000597	2	0	0	0	0	0	0	2	0	0	0	0	0	0	0	0.003673	0	Bacteria	Proteobacteria	Alphaproteobacteria
Otu000621	2	0	0	0	2	0	0	0	0	0	0	0	0.003252	0	0	0	0	Bacteria	Actinobacteria	Coriobacteriia	Coriobacteriales	Eggerthellaceae	Adlercreutzia
Otu000627	2	0	0	1	0	0	0	1	0	0	0	0.001765	0	0	0	0.001837	0	Bacteria	Proteobacteria	Alphaproteobacteria	Elsterales
Otu000645	2	0	0	0	0	0	0	2	0	0	0	0	0	0	0	0.003673	0	Bacteria	Acidobacteria	Acidobacteriia	Subgroup_2	bacterium_enrichment_culture_clone_heteroC52_4W
Otu000650	2	0	0	1	1	0	0	0	0	0	0	0.001765	0.001626	0	0	0	0	Bacteria	Bacteroidetes	Bacteroidia	Bacteroidales	Muribaculaceae
Otu000661	2	0	0	0	2	0	0	0	0	0	0	0	0.003252	0	0	0	0	Bacteria	Bacteroidetes	Bacteroidia	Bacteroidales	Muribaculaceae
Otu000701	2	0	1	0	0	1	0	0	0	0	0.001426	0	0	0.001543	0	0	0	Bacteria	Bacteroidetes	Bacteroidia	Bacteroidales	Muribaculaceae
Otu000704	2	0	0	0	0	0	0	2	0	0	0	0	0	0	0	0.003673	0	Bacteria	Chloroflexi	Ktedonobacteria	Ktedonobacterales	JG30-KF-AS9
Otu000715	2	0	1	0	0	0	0	0	1	0	0.001426	0	0	0	0	0	0.001896	Bacteria	Bacteroidetes	Bacteroidia	Bacteroidales
Otu000725	2	0	0	0	2	0	0	0	0	0	0	0	0.003252	0	0	0	0	Bacteria	Firmicutes	Erysipelotrichia	Erysipelotrichales	Erysipelotrichaceae	Dubosiella
Otu000756	2	0	0	0	0	0	1	0	1	0	0	0	0	0	0.001972	0	0.001896	Bacteria	Bacteroidetes	Bacteroidia	Bacteroidales	Muribaculaceae
Otu000767	2	0	0	0	2	0	0	0	0	0	0	0	0.003252	0	0	0	0	Bacteria	Bacteroidetes	Bacteroidia	Bacteroidales	Muribaculaceae
Otu000768	2	0	0	0	1	0	0	1	0	0	0	0	0.001626	0	0	0.001837	0	Bacteria	Actinobacteria	Actinobacteria	Frankiales	Acidothermaceae	Acidothermus
Otu000786	2	0	0	0	1	0	0	0	1	0	0	0	0.001626	0	0	0	0.001896	Bacteria	Bacteroidetes	Bacteroidia	Bacteroidales	Muribaculaceae
Otu000816	2	0	0	0	0	0	0	2	0	0	0	0	0	0	0	0.003673	0	Bacteria	Bacteroidetes	Bacteroidia	Bacteroidales	Muribaculaceae
Otu000838	2	0	0	0	0	0	0	1	1	0	0	0	0	0	0	0.001837	0.001896	Bacteria	Bacteroidetes	Bacteroidia	Bacteroidales	Muribaculaceae
Otu000863	2	0	0	2	0	0	0	0	0	0	0	0.00353	0	0	0	0	0	Bacteria	Firmicutes	Bacilli	Bacillales	Bacillaceae
Otu000875	2	0	0	0	0	0	2	0	0	0	0	0	0	0	0.003944	0	0	Bacteria	Firmicutes	Clostridia	Clostridiales	Ruminococcaceae	Harryflintia
Otu000878	2	0	0	0	1	0	0	0	1	0	0	0	0.001626	0	0	0	0.001896	Bacteria	Bacteroidetes	Bacteroidia	Bacteroidales	Muribaculaceae
Otu000925	2	0	0	0	0	0	2	0	0	0	0	0	0	0	0.003944	0	0	Bacteria	Firmicutes	Clostridia	Clostridiales	Lachnospiraceae
Otu000932	2	1	0	0	0	0	0	1	0	0.001792	0	0	0	0	0	0.001837	0	Bacteria	Firmicutes	Erysipelotrichia	Erysipelotrichales	Erysipelotrichaceae	Dubosiella
Otu000972	2	0	0	0	0	0	0	0	2	0	0	0	0	0	0	0	0.003792	Bacteria	Firmicutes	Clostridia	Clostridiales	Lachnospiraceae
Otu000976	2	0	1	0	0	0	0	1	0	0	0.001426	0	0	0	0	0.001837	0	Bacteria	Bacteroidetes	Bacteroidia	Bacteroidales	Muribaculaceae
Otu001002	2	0	0	0	0	0	1	0	1	0	0	0	0	0	0.001972	0	0.001896	Bacteria	Bacteroidetes	Bacteroidia	Bacteroidales	Rikenellaceae	Rikenellaceae_RC9_gut_group
Otu001010	2	0	0	0	0	0	0	0	2	0	0	0	0	0	0	0	0.003792	Bacteria	Bacteroidetes	Bacteroidia	Bacteroidales	Prevotellaceae
Otu001039	2	0	2	0	0	0	0	0	0	0	0.002853	0	0	0	0	0	0	Bacteria	Bacteroidetes	Bacteroidia	Bacteroidales	Muribaculaceae
Otu001050	2	0	0	0	0	1	0	1	0	0	0	0	0	0.001543	0	0.001837	0	Bacteria	Firmicutes	Clostridia	Clostridiales	Lachnospiraceae
Otu001056	2	1	0	1	0	0	0	0	0	0.001792	0	0.001765	0	0	0	0	0	Bacteria	Cyanobacteria	Oxyphotobacteria	Chloroplast
Otu001062	2	0	0	0	0	2	0	0	0	0	0	0	0	0.003086	0	0	0	Bacteria	Bacteroidetes	Bacteroidia	Bacteroidales	Muribaculaceae
Otu001063	2	2	0	0	0	0	0	0	0	0.003584	0	0	0	0	0	0	0	Bacteria	Planctomycetes	Planctomycetacia	Isosphaerales	Isosphaeraceae	Aquisphaera
Otu001071	2	0	0	0	0	1	0	0	1	0	0	0	0	0.001543	0	0	0.001896	Bacteria	Firmicutes	Clostridia	Clostridiales	Lachnospiraceae
Otu001120	2	0	0	0	1	0	0	0	1	0	0	0	0.001626	0	0	0	0.001896	Bacteria	Bacteroidetes	Bacteroidia	Bacteroidales	Muribaculaceae
Otu001145	2	0	0	0	0	0	0	1	1	0	0	0	0	0	0	0.001837	0.001896	Bacteria	Firmicutes	Clostridia	Clostridiales	Lachnospiraceae
Otu001159	2	1	0	0	0	0	0	1	0	0.001792	0	0	0	0	0	0.001837	0	Bacteria
Otu001169	2	0	2	0	0	0	0	0	0	0	0.002853	0	0	0	0	0	0	Bacteria	Verrucomicrobia	Verrucomicrobiae	Verrucomicrobiales	Akkermansiaceae	Akkermansia
Otu001221	2	0	0	0	0	0	0	2	0	0	0	0	0	0	0	0.003673	0	Bacteria	Bacteroidetes	Bacteroidia	Bacteroidales	Muribaculaceae
Otu001235	2	0	1	0	0	0	0	1	0	0	0.001426	0	0	0	0	0.001837	0	Bacteria	Verrucomicrobia	Verrucomicrobiae	Chthoniobacterales	Xiphinematobacteraceae	Candidatus_Xiphinematobacter
Otu001239	2	0	2	0	0	0	0	0	0	0	0.002853	0	0	0	0	0	0	Bacteria	Bacteroidetes	Bacteroidia	Bacteroidales	Muribaculaceae
Otu001242	2	0	0	0	0	2	0	0	0	0	0	0	0	0.003086	0	0	0	Bacteria	Firmicutes	Clostridia	Clostridiales	Lachnospiraceae
Otu001254	2	0	2	0	0	0	0	0	0	0	0.002853	0	0	0	0	0	0	Bacteria	Bacteroidetes	Bacteroidia	Bacteroidales	Muribaculaceae
Otu001287	2	0	0	0	2	0	0	0	0	0	0	0	0.003252	0	0	0	0	Bacteria	Verrucomicrobia	Verrucomicrobiae	Verrucomicrobiales	Akkermansiaceae	Akkermansia	Akkermansia_muciniphila
Otu001305	2	0	1	0	0	0	1	0	0	0	0.001426	0	0	0	0.001972	0	0	Bacteria	Firmicutes	Bacilli	Lactobacillales	Lactobacillaceae	Pediococcus	Pediococcus_pentosaceus
Otu001311	2	0	0	0	0	1	0	0	1	0	0	0	0	0.001543	0	0	0.001896	Bacteria	Bacteroidetes	Bacteroidia	Bacteroidales	Muribaculaceae
Otu001351	2	0	2	0	0	0	0	0	0	0	0.002853	0	0	0	0	0	0	Bacteria	Verrucomicrobia	Verrucomicrobiae	Verrucomicrobiales	Akkermansiaceae	Akkermansia	Akkermansia_muciniphila
Otu001352	2	0	1	0	1	0	0	0	0	0	0.001426	0	0.001626	0	0	0	0	Bacteria	Proteobacteria	Gammaproteobacteria	Xanthomonadales	Xanthomonadaceae	Stenotrophomonas
Otu001378	2	0	2	0	0	0	0	0	0	0	0.002853	0	0	0	0	0	0	Bacteria	Firmicutes	Clostridia	Clostridiales	Ruminococcaceae
Otu001385	2	0	1	0	0	0	0	1	0	0	0.001426	0	0	0	0	0.001837	0	Bacteria	Bacteroidetes	Bacteroidia	Bacteroidales	Muribaculaceae
Otu001390	2	1	0	0	0	0	0	1	0	0.001792	0	0	0	0	0	0.001837	0	Bacteria	Actinobacteria	Actinobacteria
Otu001461	2	0	0	0	0	0	0	1	1	0	0	0	0	0	0	0.001837	0.001896	Bacteria	Firmicutes	Clostridia	Clostridiales	Lachnospiraceae
Otu001518	2	0	0	0	0	1	0	1	0	0	0	0	0	0.001543	0	0.001837	0	Bacteria
Otu001538	2	0	2	0	0	0	0	0	0	0	0.002853	0	0	0	0	0	0	Bacteria	Firmicutes	Clostridia	Clostridiales	Family_XI	Tissierella
Otu001558	2	0	0	0	0	1	1	0	0	0	0	0	0	0.001543	0.001972	0	0	Bacteria	Firmicutes	Clostridia	Clostridiales
Otu001562	2	0	2	0	0	0	0	0	0	0	0.002853	0	0	0	0	0	0	Bacteria	Verrucomicrobia	Verrucomicrobiae	Verrucomicrobiales	Akkermansiaceae	Akkermansia	Akkermansia_muciniphila
Otu001563	2	0	0	1	0	1	0	0	0	0	0	0.001765	0	0.001543	0	0	0	Bacteria	Firmicutes	Bacilli	Lactobacillales	Carnobacteriaceae	Atopostipes
Otu001571	2	0	0	0	0	0	0	2	0	0	0	0	0	0	0	0.003673	0	Bacteria	Chloroflexi	Ktedonobacteria	Ktedonobacterales	JG30-KF-AS9
Otu001582	2	0	0	0	0	0	1	1	0	0	0	0	0	0	0.001972	0.001837	0	Bacteria	Bacteroidetes	Bacteroidia	Bacteroidales	Muribaculaceae
Otu001589	2	0	0	0	0	1	0	0	1	0	0	0	0	0.001543	0	0	0.001896	Bacteria	Bacteroidetes	Bacteroidia	Bacteroidales
Otu001635	2	0	0	0	0	0	0	2	0	0	0	0	0	0	0	0.003673	0	Bacteria	Bacteroidetes	Bacteroidia	Bacteroidales	Muribaculaceae
Otu001636	2	0	2	0	0	0	0	0	0	0	0.002853	0	0	0	0	0	0	Bacteria	Verrucomicrobia	Verrucomicrobiae	Verrucomicrobiales	Akkermansiaceae	Akkermansia	Akkermansia_muciniphila
Otu001669	2	0	1	0	1	0	0	0	0	0	0.001426	0	0.001626	0	0	0	0	Bacteria	Bacteroidetes	Bacteroidia	Bacteroidales	Muribaculaceae
Otu001673	2	2	0	0	0	0	0	0	0	0.003584	0	0	0	0	0	0	0	Bacteria	Planctomycetes	Planctomycetacia	Pirellulales	Pirellulaceae
Otu001682	2	0	0	0	0	0	0	0	2	0	0	0	0	0	0	0	0.003792	Bacteria	Bacteroidetes	Bacteroidia	Bacteroidales	Prevotellaceae	Alloprevotella
Otu001720	2	0	1	0	0	0	0	1	0	0	0.001426	0	0	0	0	0.001837	0	Bacteria	Bacteroidetes	Bacteroidia	Bacteroidales	Muribaculaceae
Otu001721	2	0	0	0	2	0	0	0	0	0	0	0	0.003252	0	0	0	0	Bacteria	Bacteroidetes	Bacteroidia	Bacteroidales	Muribaculaceae
Otu001731	2	0	1	0	0	0	0	0	1	0	0.001426	0	0	0	0	0	0.001896	Bacteria	Firmicutes	Clostridia	Clostridiales	Ruminococcaceae
Otu001746	2	0	0	0	0	2	0	0	0	0	0	0	0	0.003086	0	0	0	Bacteria	Firmicutes	Clostridia	Clostridiales	Lachnospiraceae
Otu001794	2	0	1	0	0	0	0	0	1	0	0.001426	0	0	0	0	0	0.001896	Bacteria	Bacteroidetes	Bacteroidia	Bacteroidales	Muribaculaceae
Otu001799	2	0	1	0	0	0	1	0	0	0	0.001426	0	0	0	0.001972	0	0	Bacteria	Bacteroidetes	Bacteroidia	Bacteroidales	Muribaculaceae
Otu001857	2	0	2	0	0	0	0	0	0	0	0.002853	0	0	0	0	0	0	Bacteria	Verrucomicrobia	Verrucomicrobiae	Verrucomicrobiales	Akkermansiaceae	Akkermansia	Akkermansia_muciniphila
Otu001898	2	1	0	0	1	0	0	0	0	0.001792	0	0	0.001626	0	0	0	0	Bacteria	Bacteroidetes	Bacteroidia	Bacteroidales	Muribaculaceae
Otu002042	2	0	2	0	0	0	0	0	0	0	0.002853	0	0	0	0	0	0	Bacteria	Bacteroidetes	Bacteroidia	Bacteroidales	Muribaculaceae
Otu002089	2	0	0	0	0	1	0	1	0	0	0	0	0	0.001543	0	0.001837	0	Bacteria	Bacteroidetes	Bacteroidia	Bacteroidales	Muribaculaceae
Otu002101	2	0	2	0	0	0	0	0	0	0	0.002853	0	0	0	0	0	0	Bacteria	Bacteroidetes	Bacteroidia	Bacteroidales	Muribaculaceae
Otu002117	2	0	0	0	1	0	0	1	0	0	0	0	0.001626	0	0	0.001837	0	Bacteria	Bacteroidetes	Bacteroidia	Bacteroidales	Muribaculaceae
Otu002146	2	0	0	0	0	1	0	0	1	0	0	0	0	0.001543	0	0	0.001896	Bacteria	Firmicutes	Erysipelotrichia	Erysipelotrichales	Erysipelotrichaceae	Erysipelatoclostridium
Otu002149	2	0	0	0	0	0	0	0	2	0	0	0	0	0	0	0	0.003792	Bacteria	Bacteroidetes	Bacteroidia	Bacteroidales
Otu002181	2	0	0	0	0	1	0	0	1	0	0	0	0	0.001543	0	0	0.001896	Bacteria	Firmicutes	Clostridia	Clostridiales	Ruminococcaceae	Ruminococcaceae_UCG-014
Otu002193	2	0	2	0	0	0	0	0	0	0	0.002853	0	0	0	0	0	0	Bacteria	Verrucomicrobia	Verrucomicrobiae	Verrucomicrobiales	Akkermansiaceae	Akkermansia	Akkermansia_muciniphila
Otu002194	2	0	0	0	0	0	0	0	2	0	0	0	0	0	0	0	0.003792	Bacteria	Bacteroidetes	Bacteroidia	Bacteroidales	Prevotellaceae
Otu002200	2	0	0	1	0	0	0	1	0	0	0	0.001765	0	0	0	0.001837	0	Bacteria	Bacteroidetes	Bacteroidia	Bacteroidales	Muribaculaceae
Otu002209	2	0	0	0	0	0	0	2	0	0	0	0	0	0	0	0.003673	0	Bacteria	Bacteroidetes	Bacteroidia	Bacteroidales	Muribaculaceae
Otu002224	2	2	0	0	0	0	0	0	0	0.003584	0	0	0	0	0	0	0	Bacteria	Firmicutes	Clostridia	Clostridiales	Ruminococcaceae	Ruminococcaceae_UCG-009	Clostridium_leptum
Otu002250	2	0	0	0	0	0	0	1	1	0	0	0	0	0	0	0.001837	0.001896	Bacteria	Bacteroidetes	Bacteroidia	Bacteroidales	Muribaculaceae
Otu002275	2	0	0	1	0	0	0	1	0	0	0	0.001765	0	0	0	0.001837	0	Bacteria	Firmicutes	Bacilli	Lactobacillales	Lactobacillaceae	Lactobacillus
Otu002293	2	0	2	0	0	0	0	0	0	0	0.002853	0	0	0	0	0	0	Bacteria	Verrucomicrobia	Verrucomicrobiae	Verrucomicrobiales	Akkermansiaceae	Akkermansia	Akkermansia_muciniphila
Otu002308	2	0	0	0	1	0	1	0	0	0	0	0	0.001626	0	0.001972	0	0	Bacteria	Bacteroidetes	Bacteroidia	Bacteroidales	Muribaculaceae
Otu002325	2	0	0	0	0	1	0	1	0	0	0	0	0	0.001543	0	0.001837	0	Bacteria	Firmicutes	Clostridia	Clostridiales	Ruminococcaceae
Otu002327	2	0	0	0	0	1	1	0	0	0	0	0	0	0.001543	0.001972	0	0	Bacteria	Firmicutes	Clostridia	Clostridiales	Lachnospiraceae
Otu002350	2	0	1	0	0	0	0	0	1	0	0.001426	0	0	0	0	0	0.001896	Bacteria	Bacteroidetes	Bacteroidia	Bacteroidales	Muribaculaceae
Otu002353	2	0	0	0	0	0	2	0	0	0	0	0	0	0	0.003944	0	0	Bacteria	Firmicutes	Clostridia	Clostridiales	Lachnospiraceae
Otu002382	2	0	0	0	0	1	0	0	1	0	0	0	0	0.001543	0	0	0.001896	Bacteria	Bacteroidetes	Bacteroidia	Bacteroidales	Muribaculaceae
Otu002387	2	0	0	0	0	0	0	0	2	0	0	0	0	0	0	0	0.003792	Bacteria
Otu002410	2	0	1	1	0	0	0	0	0	0	0.001426	0.001765	0	0	0	0	0	Bacteria	Bacteroidetes	Bacteroidia	Bacteroidales	Muribaculaceae
Otu002421	2	0	0	0	2	0	0	0	0	0	0	0	0.003252	0	0	0	0	Bacteria	Firmicutes	Erysipelotrichia	Erysipelotrichales	Erysipelotrichaceae	Allobaculum
Otu002457	2	0	0	0	0	0	0	1	1	0	0	0	0	0	0	0.001837	0.001896	Bacteria	Bacteroidetes	Bacteroidia	Bacteroidales	Muribaculaceae
Otu002460	2	1	0	0	0	0	0	0	1	0.001792	0	0	0	0	0	0	0.001896	Bacteria	Bacteroidetes	Bacteroidia	Bacteroidales	Muribaculaceae
Otu002487	2	2	0	0	0	0	0	0	0	0.003584	0	0	0	0	0	0	0	Bacteria	Firmicutes	Bacilli	Lactobacillales	Lactobacillaceae	Lactobacillus
Otu002536	2	0	0	0	0	1	1	0	0	0	0	0	0	0.001543	0.001972	0	0	Bacteria	Firmicutes	Clostridia	Clostridiales	Lachnospiraceae	Lachnoclostridium
Otu002545	2	0	0	0	0	0	0	2	0	0	0	0	0	0	0	0.003673	0	Bacteria	Proteobacteria	Alphaproteobacteria	Rhizobiales	Beijerinckiaceae	Methylobacterium	Methylobacterium_aquaticum
Otu002563	2	0	0	0	0	0	2	0	0	0	0	0	0	0	0.003944	0	0	Bacteria	Proteobacteria	Gammaproteobacteria	Alteromonadales	Marinobacteraceae	Marinobacter
Otu002579	2	0	0	0	0	1	0	0	1	0	0	0	0	0.001543	0	0	0.001896	Bacteria	Bacteroidetes	Bacteroidia	Bacteroidales	Muribaculaceae
Otu002594	2	0	2	0	0	0	0	0	0	0	0.002853	0	0	0	0	0	0	Bacteria	Verrucomicrobia	Verrucomicrobiae	Verrucomicrobiales	Akkermansiaceae	Akkermansia	Akkermansia_muciniphila
Otu002597	2	0	2	0	0	0	0	0	0	0	0.002853	0	0	0	0	0	0	Bacteria
Otu002608	2	0	2	0	0	0	0	0	0	0	0.002853	0	0	0	0	0	0	Bacteria	Verrucomicrobia	Verrucomicrobiae	Verrucomicrobiales	Akkermansiaceae	Akkermansia	Akkermansia_muciniphila
Otu002614	2	0	0	0	0	1	0	0	1	0	0	0	0	0.001543	0	0	0.001896	Bacteria
Otu002622	2	0	0	0	0	2	0	0	0	0	0	0	0	0.003086	0	0	0	Bacteria	Firmicutes	Clostridia	Clostridiales	Lachnospiraceae	Lachnospiraceae_NK4A136_group
Otu002626	2	0	0	0	0	1	1	0	0	0	0	0	0	0.001543	0.001972	0	0	Bacteria	Bacteroidetes	Bacteroidia	Bacteroidales	Muribaculaceae
Otu002631	2	0	2	0	0	0	0	0	0	0	0.002853	0	0	0	0	0	0	Bacteria	Verrucomicrobia	Verrucomicrobiae	Verrucomicrobiales	Akkermansiaceae	Akkermansia	Akkermansia_muciniphila
Otu002635	2	0	0	1	0	0	1	0	0	0	0	0.001765	0	0	0.001972	0	0	Bacteria	Firmicutes	Bacilli	Lactobacillales	Lactobacillaceae	Lactobacillus	Lactobacillus_murinus
Otu002643	2	0	1	0	0	1	0	0	0	0	0.001426	0	0	0.001543	0	0	0	Bacteria	Bacteroidetes	Bacteroidia	Bacteroidales	Muribaculaceae
Otu002650	2	0	0	0	0	1	0	1	0	0	0	0	0	0.001543	0	0.001837	0	Bacteria	Firmicutes	Clostridia	Clostridiales	Lachnospiraceae	Lachnospiraceae_NK4A136_group
Otu002673	2	0	2	0	0	0	0	0	0	0	0.002853	0	0	0	0	0	0	Bacteria	Verrucomicrobia	Verrucomicrobiae	Verrucomicrobiales	Akkermansiaceae	Akkermansia	Akkermansia_muciniphila
Otu002693	2	0	1	0	0	0	0	0	1	0	0.001426	0	0	0	0	0	0.001896	Bacteria	Firmicutes	Bacilli	Lactobacillales	Lactobacillaceae	Lactobacillus
Otu002706	2	0	0	0	0	1	0	0	1	0	0	0	0	0.001543	0	0	0.001896	Bacteria	Bacteroidetes	Bacteroidia	Bacteroidales	Muribaculaceae
Otu002743	2	0	0	0	0	0	2	0	0	0	0	0	0	0	0.003944	0	0	Bacteria	Firmicutes	Clostridia	Clostridiales	Lachnospiraceae
Otu002749	2	0	2	0	0	0	0	0	0	0	0.002853	0	0	0	0	0	0	Bacteria	Verrucomicrobia	Verrucomicrobiae	Verrucomicrobiales	Akkermansiaceae	Akkermansia	Akkermansia_muciniphila
Otu002756	2	0	1	0	0	0	0	1	0	0	0.001426	0	0	0	0	0.001837	0	Bacteria	Firmicutes	Clostridia	Clostridiales	Ruminococcaceae	Anaerotruncus	Anaerotruncus_sp_G32012
Otu002769	2	0	0	0	0	0	2	0	0	0	0	0	0	0	0.003944	0	0	Bacteria	Firmicutes	Bacilli	Lactobacillales	Lactobacillaceae	Lactobacillus
Otu002775	2	1	0	0	0	1	0	0	0	0.001792	0	0	0	0.001543	0	0	0	Bacteria	Firmicutes	Bacilli	Lactobacillales	Lactobacillaceae	Lactobacillus
Otu002778	2	0	0	0	0	2	0	0	0	0	0	0	0	0.003086	0	0	0	Bacteria	Proteobacteria	Gammaproteobacteria	Nitrosococcales	Methylophagaceae	Methylophaga
Otu002783	2	0	0	0	1	0	1	0	0	0	0	0	0.001626	0	0.001972	0	0	Bacteria	Firmicutes	Bacilli	Lactobacillales	Lactobacillaceae	Lactobacillus
Otu002802	2	0	2	0	0	0	0	0	0	0	0.002853	0	0	0	0	0	0	Bacteria	Verrucomicrobia	Verrucomicrobiae	Verrucomicrobiales	Akkermansiaceae	Akkermansia	Akkermansia_muciniphila
Otu002805	2	1	0	0	1	0	0	0	0	0.001792	0	0	0.001626	0	0	0	0	Bacteria	Proteobacteria	Alphaproteobacteria	Rhizobiales	Rhizobiaceae	Allorhizobium-Neorhizobium-Pararhizobium-Rhizobium
Otu002849	2	0	0	0	0	0	0	1	1	0	0	0	0	0	0	0.001837	0.001896	Bacteria	Bacteroidetes	Bacteroidia	Bacteroidales	Muribaculaceae
Otu002850	2	0	2	0	0	0	0	0	0	0	0.002853	0	0	0	0	0	0	Bacteria	Verrucomicrobia	Verrucomicrobiae	Verrucomicrobiales	Akkermansiaceae	Akkermansia	Akkermansia_muciniphila
Otu002857	2	1	0	0	0	0	0	1	0	0.001792	0	0	0	0	0	0.001837	0	Bacteria	Firmicutes	Bacilli	Lactobacillales	Lactobacillaceae	Lactobacillus
Otu002859	2	0	0	0	0	0	0	0	2	0	0	0	0	0	0	0	0.003792	Bacteria	Bacteroidetes	Bacteroidia	Bacteroidales	Prevotellaceae
Otu002866	2	0	0	0	0	2	0	0	0	0	0	0	0	0.003086	0	0	0	Bacteria	Bacteroidetes	Bacteroidia	Bacteroidales	Muribaculaceae
Otu002869	2	0	0	0	0	0	0	1	1	0	0	0	0	0	0	0.001837	0.001896	Bacteria	Firmicutes	Clostridia	Clostridiales	Lachnospiraceae
Otu002890	2	0	0	0	2	0	0	0	0	0	0	0	0.003252	0	0	0	0	Bacteria	Firmicutes	Erysipelotrichia	Erysipelotrichales	Erysipelotrichaceae	Dubosiella
Otu002902	2	0	0	0	0	0	0	0	2	0	0	0	0	0	0	0	0.003792	Bacteria	Bacteroidetes	Bacteroidia	Bacteroidales	Prevotellaceae
Otu002950	2	0	0	0	0	1	1	0	0	0	0	0	0	0.001543	0.001972	0	0	Bacteria	Firmicutes	Clostridia	Clostridiales	Lachnospiraceae
Otu002969	2	0	0	0	0	2	0	0	0	0	0	0	0	0.003086	0	0	0	Bacteria	Firmicutes	Clostridia	Clostridiales
Otu002978	2	0	0	0	0	1	0	0	1	0	0	0	0	0.001543	0	0	0.001896	Bacteria	Bacteroidetes	Bacteroidia	Bacteroidales	Prevotellaceae
Otu002981	2	0	2	0	0	0	0	0	0	0	0.002853	0	0	0	0	0	0	Bacteria	Verrucomicrobia	Verrucomicrobiae	Verrucomicrobiales	Akkermansiaceae	Akkermansia	Akkermansia_muciniphila
Otu002984	2	0	0	0	2	0	0	0	0	0	0	0	0.003252	0	0	0	0	Bacteria	Firmicutes	Clostridia	Clostridiales	Ruminococcaceae	Ruminococcaceae_UCG-010
Otu003015	2	0	0	0	0	0	0	0	2	0	0	0	0	0	0	0	0.003792	Bacteria	Bacteroidetes	Bacteroidia	Bacteroidales
Otu003016	2	1	0	0	0	0	0	0	1	0.001792	0	0	0	0	0	0	0.001896	Bacteria	Firmicutes	Bacilli	Lactobacillales	Lactobacillaceae	Lactobacillus	Lactobacillus_murinus
Otu003023	2	1	0	0	1	0	0	0	0	0.001792	0	0	0.001626	0	0	0	0	Bacteria	Firmicutes	Bacilli	Lactobacillales	Lactobacillaceae	Lactobacillus	Lactobacillus_murinus
Otu003039	2	0	0	0	0	1	0	1	0	0	0	0	0	0.001543	0	0.001837	0	Bacteria	Firmicutes	Clostridia	Clostridiales	Ruminococcaceae	Ruminococcaceae_UCG-014
Otu003042	2	2	0	0	0	0	0	0	0	0.003584	0	0	0	0	0	0	0	Bacteria	Firmicutes	Bacilli	Lactobacillales	Lactobacillaceae	Lactobacillus
Otu003058	2	0	0	1	0	0	0	0	1	0	0	0.001765	0	0	0	0	0.001896	Bacteria	Firmicutes	Bacilli	Lactobacillales	Lactobacillaceae	Lactobacillus	Lactobacillus_murinus
Otu003064	2	0	0	0	0	0	0	1	1	0	0	0	0	0	0	0.001837	0.001896	Bacteria	Firmicutes	Clostridia	Clostridiales	Ruminococcaceae
Otu003073	2	0	0	0	0	2	0	0	0	0	0	0	0	0.003086	0	0	0	Bacteria	Bacteroidetes	Bacteroidia	Bacteroidales	Muribaculaceae
Otu003084	2	0	0	0	0	2	0	0	0	0	0	0	0	0.003086	0	0	0	Bacteria	Bacteroidetes	Bacteroidia	Bacteroidales	Prevotellaceae
Otu003111	2	0	2	0	0	0	0	0	0	0	0.002853	0	0	0	0	0	0	Bacteria	Verrucomicrobia	Verrucomicrobiae	Verrucomicrobiales	Akkermansiaceae	Akkermansia
Otu003148	2	0	0	0	0	0	0	0	2	0	0	0	0	0	0	0	0.003792	Bacteria	Firmicutes	Bacilli	Lactobacillales	Lactobacillaceae
Otu003203	2	0	0	0	0	0	0	2	0	0	0	0	0	0	0	0.003673	0	Bacteria	Bacteroidetes	Bacteroidia	Bacteroidales	Muribaculaceae
Otu003204	2	1	0	0	1	0	0	0	0	0.001792	0	0	0.001626	0	0	0	0	Bacteria	Firmicutes	Bacilli	Lactobacillales	Lactobacillaceae	Lactobacillus
Otu003218	2	0	0	0	0	0	0	0	2	0	0	0	0	0	0	0	0.003792	Bacteria	Bacteroidetes	Bacteroidia	Bacteroidales	Prevotellaceae	Alloprevotella
Otu003249	2	2	0	0	0	0	0	0	0	0.003584	0	0	0	0	0	0	0	Bacteria	Cyanobacteria	Oxyphotobacteria	Chloroplast
Otu003254	2	0	0	0	0	0	0	0	2	0	0	0	0	0	0	0	0.003792	Bacteria	Bacteroidetes	Bacteroidia	Bacteroidales
Otu003278	2	0	0	0	0	1	0	0	1	0	0	0	0	0.001543	0	0	0.001896	Bacteria	Firmicutes	Clostridia	Clostridiales	Lachnospiraceae	Lachnospiraceae_NK4A136_group	Lachnospiraceae_bacterium_DW17
Otu003289	2	0	0	1	1	0	0	0	0	0	0	0.001765	0.001626	0	0	0	0	Bacteria	Firmicutes	Bacilli	Lactobacillales	Lactobacillaceae	Lactobacillus
Otu003293	2	0	0	0	0	1	1	0	0	0	0	0	0	0.001543	0.001972	0	0	Bacteria	Firmicutes	Clostridia	Clostridiales	Ruminococcaceae	Anaerotruncus	Anaerotruncus_sp_G32012
Otu003296	2	0	0	0	0	1	0	1	0	0	0	0	0	0.001543	0	0.001837	0	Bacteria	Firmicutes	Clostridia	Clostridiales	Lachnospiraceae
Otu003326	2	0	0	0	0	0	0	0	2	0	0	0	0	0	0	0	0.003792	Bacteria	Bacteroidetes	Bacteroidia	Bacteroidales	Prevotellaceae	Alloprevotella
Otu003327	2	0	0	0	0	0	0	2	0	0	0	0	0	0	0	0.003673	0	Bacteria	Bacteroidetes	Bacteroidia	Bacteroidales	Muribaculaceae
Otu003343	2	2	0	0	0	0	0	0	0	0.003584	0	0	0	0	0	0	0	Bacteria	Firmicutes	Bacilli	Lactobacillales	Lactobacillaceae	Lactobacillus
Otu003361	2	0	0	1	0	0	0	1	0	0	0	0.001765	0	0	0	0.001837	0	Bacteria	Firmicutes	Bacilli	Lactobacillales	Lactobacillaceae	Lactobacillus
Otu003366	2	0	0	0	0	0	0	0	2	0	0	0	0	0	0	0	0.003792	Bacteria	Bacteroidetes	Bacteroidia	Bacteroidales	Prevotellaceae
Otu003395	2	0	0	0	2	0	0	0	0	0	0	0	0.003252	0	0	0	0	Bacteria	Firmicutes	Clostridia	Clostridiales	Ruminococcaceae
Otu003396	2	0	0	0	0	0	0	2	0	0	0	0	0	0	0	0.003673	0	Bacteria	Bacteroidetes	Bacteroidia	Bacteroidales	Muribaculaceae
Otu003399	2	0	0	0	2	0	0	0	0	0	0	0	0.003252	0	0	0	0	Bacteria	Proteobacteria	Alphaproteobacteria	Sphingomonadales	Sphingomonadaceae	Sphingomonas
Otu003403	2	0	0	1	0	0	1	0	0	0	0	0.001765	0	0	0.001972	0	0	Bacteria	Firmicutes	Bacilli	Lactobacillales	Lactobacillaceae	Lactobacillus	Lactobacillus_murinus
Otu003435	2	0	2	0	0	0	0	0	0	0	0.002853	0	0	0	0	0	0	Bacteria	Bacteroidetes	Bacteroidia	Bacteroidales
Otu003437	2	0	2	0	0	0	0	0	0	0	0.002853	0	0	0	0	0	0	Bacteria	Verrucomicrobia	Verrucomicrobiae	Verrucomicrobiales	Akkermansiaceae	Akkermansia	Akkermansia_muciniphila
Otu003441	2	0	0	0	1	0	1	0	0	0	0	0	0.001626	0	0.001972	0	0	Bacteria	Firmicutes	Bacilli	Lactobacillales	Lactobacillaceae	Lactobacillus
Otu003444	2	0	0	0	0	0	1	1	0	0	0	0	0	0	0.001972	0.001837	0	Bacteria	Bacteroidetes	Bacteroidia	Bacteroidales	Muribaculaceae
Otu003455	2	0	0	1	0	0	1	0	0	0	0	0.001765	0	0	0.001972	0	0	Bacteria	Firmicutes	Bacilli	Lactobacillales	Lactobacillaceae	Lactobacillus	Lactobacillus_murinus
Otu003481	2	0	0	0	0	0	0	0	2	0	0	0	0	0	0	0	0.003792	Bacteria	Bacteroidetes	Bacteroidia	Bacteroidales	Prevotellaceae	Alloprevotella
Otu003491	2	1	0	0	0	0	1	0	0	0.001792	0	0	0	0	0.001972	0	0	Bacteria	Firmicutes	Bacilli	Lactobacillales	Lactobacillaceae	Lactobacillus	Lactobacillus_murinus
Otu003507	2	0	0	0	0	2	0	0	0	0	0	0	0	0.003086	0	0	0	Bacteria
Otu003508	2	0	0	1	1	0	0	0	0	0	0	0.001765	0.001626	0	0	0	0	Bacteria	Firmicutes	Bacilli	Lactobacillales	Lactobacillaceae	Lactobacillus	Lactobacillus_murinus
Otu003510	2	0	0	0	0	0	2	0	0	0	0	0	0	0	0.003944	0	0	Bacteria	Firmicutes	Clostridia	Clostridiales	Lachnospiraceae
Otu003524	2	0	0	0	0	2	0	0	0	0	0	0	0	0.003086	0	0	0	Bacteria
Otu003526	2	0	1	0	0	0	0	1	0	0	0.001426	0	0	0	0	0.001837	0	Bacteria	Verrucomicrobia	Verrucomicrobiae	Verrucomicrobiales	Akkermansiaceae	Akkermansia
Otu003527	2	1	0	1	0	0	0	0	0	0.001792	0	0.001765	0	0	0	0	0	Bacteria	Firmicutes	Bacilli	Lactobacillales	Lactobacillaceae	Lactobacillus	Lactobacillus_murinus
Otu003534	2	0	2	0	0	0	0	0	0	0	0.002853	0	0	0	0	0	0	Bacteria	Verrucomicrobia	Verrucomicrobiae	Verrucomicrobiales	Akkermansiaceae	Akkermansia	Akkermansia_muciniphila
Otu003548	2	1	0	1	0	0	0	0	0	0.001792	0	0.001765	0	0	0	0	0	Bacteria	Firmicutes	Bacilli	Lactobacillales	Lactobacillaceae	Lactobacillus	Lactobacillus_murinus
Otu003550	2	0	0	0	0	0	0	0	2	0	0	0	0	0	0	0	0.003792	Bacteria
Otu003555	2	0	0	1	0	1	0	0	0	0	0	0.001765	0	0.001543	0	0	0	Bacteria	Firmicutes	Bacilli	Lactobacillales	Streptococcaceae	Streptococcus	Streptococcus_danieliae
Otu003560	2	1	0	0	0	0	1	0	0	0.001792	0	0	0	0	0.001972	0	0	Bacteria	Firmicutes	Bacilli	Lactobacillales	Lactobacillaceae	Lactobacillus	Lactobacillus_murinus
Otu003571	2	1	0	0	0	0	0	1	0	0.001792	0	0	0	0	0	0.001837	0	Bacteria	Firmicutes	Bacilli	Lactobacillales	Lactobacillaceae	Lactobacillus
Otu003572	2	1	0	1	0	0	0	0	0	0.001792	0	0.001765	0	0	0	0	0	Bacteria	Firmicutes	Bacilli	Lactobacillales	Lactobacillaceae	Lactobacillus	Lactobacillus_murinus
Otu003578	2	0	0	0	0	1	0	1	0	0	0	0	0	0.001543	0	0.001837	0	Bacteria	Firmicutes	Clostridia	Clostridiales	Lachnospiraceae	Lachnospiraceae_NK4A136_group	Lachnospiraceae_bacterium_A4
Otu003589	2	1	0	0	0	0	0	1	0	0.001792	0	0	0	0	0	0.001837	0	Bacteria	Firmicutes	Bacilli	Lactobacillales	Lactobacillaceae	Lactobacillus
Otu003593	2	0	0	0	1	0	0	1	0	0	0	0	0.001626	0	0	0.001837	0	Bacteria	Firmicutes	Bacilli	Lactobacillales	Lactobacillaceae	Lactobacillus
Otu003610	2	0	0	0	1	0	1	0	0	0	0	0	0.001626	0	0.001972	0	0	Bacteria	Firmicutes	Bacilli	Lactobacillales	Lactobacillaceae	Lactobacillus	Lactobacillus_murinus
Otu003618	2	0	0	0	0	0	0	0	2	0	0	0	0	0	0	0	0.003792	Bacteria	Bacteroidetes	Bacteroidia	Bacteroidales	Prevotellaceae
Otu003645	2	0	2	0	0	0	0	0	0	0	0.002853	0	0	0	0	0	0	Bacteria	Firmicutes	Clostridia	Clostridiales
Otu003658	2	0	0	0	0	1	0	1	0	0	0	0	0	0.001543	0	0.001837	0	Bacteria	Bacteroidetes	Bacteroidia	Bacteroidales	Muribaculaceae
Otu003659	2	0	0	0	0	0	0	1	1	0	0	0	0	0	0	0.001837	0.001896	Bacteria	Bacteroidetes	Bacteroidia	Bacteroidales	Muribaculaceae
Otu003666	2	2	0	0	0	0	0	0	0	0.003584	0	0	0	0	0	0	0	Bacteria	Firmicutes	Bacilli	Lactobacillales	Lactobacillaceae	Lactobacillus
Otu003696	2	0	0	0	0	0	1	0	1	0	0	0	0	0	0.001972	0	0.001896	Bacteria	Proteobacteria	Gammaproteobacteria	Betaproteobacteriales	Burkholderiaceae	Parasutterella
Otu003715	2	0	0	0	0	0	0	0	2	0	0	0	0	0	0	0	0.003792	Bacteria	Bacteroidetes	Bacteroidia	Bacteroidales	Prevotellaceae
Otu003718	2	1	0	1	0	0	0	0	0	0.001792	0	0.001765	0	0	0	0	0	Bacteria	Firmicutes	Bacilli	Lactobacillales	Lactobacillaceae	Lactobacillus	Lactobacillus_murinus
Otu003731	2	0	0	0	0	1	0	1	0	0	0	0	0	0.001543	0	0.001837	0	Bacteria	Bacteroidetes	Bacteroidia	Bacteroidales	Muribaculaceae
Otu003732	2	0	2	0	0	0	0	0	0	0	0.002853	0	0	0	0	0	0	Bacteria	Verrucomicrobia	Verrucomicrobiae	Verrucomicrobiales	Akkermansiaceae	Akkermansia	Akkermansia_muciniphila
Otu003776	2	0	0	0	0	0	1	0	1	0	0	0	0	0	0.001972	0	0.001896	Bacteria	Firmicutes	Erysipelotrichia	Erysipelotrichales	Erysipelotrichaceae	Erysipelatoclostridium
Otu003787	2	0	0	0	0	0	0	0	2	0	0	0	0	0	0	0	0.003792	Bacteria	Bacteroidetes	Bacteroidia	Bacteroidales	Prevotellaceae
Otu003803	2	0	0	0	1	0	1	0	0	0	0	0	0.001626	0	0.001972	0	0	Bacteria	Firmicutes	Bacilli	Lactobacillales	Lactobacillaceae	Lactobacillus	Lactobacillus_murinus
Otu003818	2	0	0	0	0	2	0	0	0	0	0	0	0	0.003086	0	0	0	Bacteria	Firmicutes	Clostridia	Clostridiales	Lachnospiraceae
Otu003825	2	0	0	0	0	0	0	1	1	0	0	0	0	0	0	0.001837	0.001896	Bacteria	Bacteroidetes	Bacteroidia	Bacteroidales	Muribaculaceae
Otu003847	2	0	0	0	0	1	1	0	0	0	0	0	0	0.001543	0.001972	0	0	Bacteria	Firmicutes	Clostridia	Clostridiales	Lachnospiraceae
Otu003871	2	0	0	0	0	0	0	0	2	0	0	0	0	0	0	0	0.003792	Bacteria	Bacteroidetes	Bacteroidia	Bacteroidales	Prevotellaceae	Alloprevotella
Otu003883	2	0	0	0	0	1	0	0	1	0	0	0	0	0.001543	0	0	0.001896	Bacteria	Bacteroidetes	Bacteroidia	Bacteroidales	Prevotellaceae	Alloprevotella
Otu003886	2	0	0	0	2	0	0	0	0	0	0	0	0.003252	0	0	0	0	Bacteria	Patescibacteria	Saccharimonadia	Saccharimonadales
Otu003887	2	1	0	0	1	0	0	0	0	0.001792	0	0	0.001626	0	0	0	0	Bacteria	Firmicutes	Bacilli	Lactobacillales	Lactobacillaceae	Lactobacillus	Lactobacillus_murinus
Otu003929	2	0	0	1	1	0	0	0	0	0	0	0.001765	0.001626	0	0	0	0	Bacteria	Firmicutes	Bacilli	Lactobacillales	Lactobacillaceae	Lactobacillus	Lactobacillus_murinus
Otu003933	2	0	0	2	0	0	0	0	0	0	0	0.00353	0	0	0	0	0	Bacteria	Firmicutes	Bacilli	Lactobacillales	Streptococcaceae	Streptococcus	Streptococcus_danieliae
Otu003938	2	0	2	0	0	0	0	0	0	0	0.002853	0	0	0	0	0	0	Bacteria	Verrucomicrobia	Verrucomicrobiae	Verrucomicrobiales	Akkermansiaceae	Akkermansia	Akkermansia_muciniphila
Otu003942	2	0	2	0	0	0	0	0	0	0	0.002853	0	0	0	0	0	0	Bacteria	Bacteroidetes	Bacteroidia	Bacteroidales	Muribaculaceae
Otu003964	2	0	0	1	1	0	0	0	0	0	0	0.001765	0.001626	0	0	0	0	Bacteria	Firmicutes	Bacilli	Lactobacillales	Lactobacillaceae	Lactobacillus
Otu003980	2	0	0	0	0	0	0	1	1	0	0	0	0	0	0	0.001837	0.001896	Bacteria	Bacteroidetes	Bacteroidia	Bacteroidales	Muribaculaceae
Otu003998	2	0	0	0	2	0	0	0	0	0	0	0	0.003252	0	0	0	0	Bacteria	Firmicutes	Bacilli	Lactobacillales	Lactobacillaceae	Lactobacillus
Otu004002	2	2	0	0	0	0	0	0	0	0.003584	0	0	0	0	0	0	0	Bacteria	Firmicutes	Bacilli	Lactobacillales	Lactobacillaceae	Lactobacillus
Otu004024	2	0	0	0	0	1	0	1	0	0	0	0	0	0.001543	0	0.001837	0	Bacteria	Bacteroidetes	Bacteroidia	Bacteroidales	Muribaculaceae
Otu004033	2	0	2	0	0	0	0	0	0	0	0.002853	0	0	0	0	0	0	Bacteria	Bacteroidetes	Bacteroidia	Bacteroidales	Muribaculaceae
Otu004074	2	0	0	0	0	1	0	1	0	0	0	0	0	0.001543	0	0.001837	0	Bacteria	Bacteroidetes	Bacteroidia	Bacteroidales	Muribaculaceae
Otu004100	2	0	0	0	0	0	0	0	2	0	0	0	0	0	0	0	0.003792	Bacteria	Bacteroidetes	Bacteroidia	Bacteroidales	Prevotellaceae
Otu004110	2	2	0	0	0	0	0	0	0	0.003584	0	0	0	0	0	0	0	Bacteria	Proteobacteria	Alphaproteobacteria	Rhizobiales	Beijerinckiaceae	Methylobacterium
Otu004111	2	0	0	0	0	0	2	0	0	0	0	0	0	0	0.003944	0	0	Bacteria	Firmicutes	Bacilli	Lactobacillales	Lactobacillaceae	Lactobacillus
Otu004176	2	2	0	0	0	0	0	0	0	0.003584	0	0	0	0	0	0	0	Bacteria	Firmicutes	Bacilli	Lactobacillales	Lactobacillaceae	Lactobacillus
Otu004178	2	0	2	0	0	0	0	0	0	0	0.002853	0	0	0	0	0	0	Bacteria	Firmicutes	Erysipelotrichia	Erysipelotrichales	Erysipelotrichaceae
Otu004191	2	0	0	0	0	2	0	0	0	0	0	0	0	0.003086	0	0	0	Bacteria	Firmicutes	Clostridia	Clostridiales	Ruminococcaceae
Otu004204	2	0	0	0	0	1	0	1	0	0	0	0	0	0.001543	0	0.001837	0	Bacteria	Firmicutes	Bacilli	Lactobacillales	Lactobacillaceae	Lactobacillus
Otu004206	2	1	0	0	0	0	0	1	0	0.001792	0	0	0	0	0	0.001837	0	Bacteria	Firmicutes	Bacilli	Lactobacillales	Lactobacillaceae	Lactobacillus
Otu004235	2	0	0	2	0	0	0	0	0	0	0	0.00353	0	0	0	0	0	Bacteria	Firmicutes	Bacilli	Lactobacillales	Lactobacillaceae	Lactobacillus	Lactobacillus_murinus
Otu004237	2	0	0	1	1	0	0	0	0	0	0	0.001765	0.001626	0	0	0	0	Bacteria	Firmicutes	Bacilli	Lactobacillales	Lactobacillaceae	Lactobacillus	Lactobacillus_murinus
Otu004247	2	0	0	0	2	0	0	0	0	0	0	0	0.003252	0	0	0	0	Bacteria	Firmicutes	Bacilli	Lactobacillales	Lactobacillaceae	Lactobacillus
Otu004248	2	0	0	1	0	0	1	0	0	0	0	0.001765	0	0	0.001972	0	0	Bacteria	Firmicutes	Bacilli	Lactobacillales	Lactobacillaceae	Lactobacillus	Lactobacillus_murinus
Otu004258	2	1	0	0	0	0	1	0	0	0.001792	0	0	0	0	0.001972	0	0	Bacteria	Firmicutes	Bacilli	Lactobacillales	Lactobacillaceae	Lactobacillus	Lactobacillus_murinus
Otu004259	2	0	1	1	0	0	0	0	0	0	0.001426	0.001765	0	0	0	0	0	Bacteria	Verrucomicrobia	Verrucomicrobiae	Verrucomicrobiales	Akkermansiaceae	Akkermansia	Akkermansia_muciniphila
Otu004265	2	2	0	0	0	0	0	0	0	0.003584	0	0	0	0	0	0	0	Bacteria	Firmicutes	Bacilli	Lactobacillales	Lactobacillaceae	Lactobacillus
Otu004277	2	1	0	1	0	0	0	0	0	0.001792	0	0.001765	0	0	0	0	0	Bacteria	Firmicutes	Bacilli	Lactobacillales	Streptococcaceae	Streptococcus	Streptococcus_danieliae
Otu004292	2	0	0	0	1	1	0	0	0	0	0	0	0.001626	0.001543	0	0	0	Bacteria	Bacteroidetes	Bacteroidia	Bacteroidales	Muribaculaceae
Otu004296	2	0	0	0	0	2	0	0	0	0	0	0	0	0.003086	0	0	0	Bacteria	Firmicutes	Clostridia	Clostridiales	Lachnospiraceae
Otu004309	2	2	0	0	0	0	0	0	0	0.003584	0	0	0	0	0	0	0	Bacteria	Firmicutes	Bacilli	Lactobacillales	Lactobacillaceae	Lactobacillus
Otu004319	2	0	0	1	1	0	0	0	0	0	0	0.001765	0.001626	0	0	0	0	Bacteria	Firmicutes	Bacilli	Lactobacillales	Streptococcaceae	Streptococcus	Streptococcus_danieliae
Otu004342	2	0	0	0	0	0	0	0	2	0	0	0	0	0	0	0	0.003792	Bacteria	Bacteroidetes	Bacteroidia	Bacteroidales	Prevotellaceae
Otu004350	2	1	0	1	0	0	0	0	0	0.001792	0	0.001765	0	0	0	0	0	Bacteria	Firmicutes	Bacilli	Lactobacillales	Lactobacillaceae	Lactobacillus	Lactobacillus_murinus
Otu004353	2	0	0	0	0	0	0	0	2	0	0	0	0	0	0	0	0.003792	Bacteria	Firmicutes	Clostridia	Clostridiales	Lachnospiraceae
Otu004365	2	0	0	1	1	0	0	0	0	0	0	0.001765	0.001626	0	0	0	0	Bacteria	Firmicutes	Bacilli	Lactobacillales	Streptococcaceae	Streptococcus	Streptococcus_danieliae
Otu004384	2	0	0	2	0	0	0	0	0	0	0	0.00353	0	0	0	0	0	Bacteria	Firmicutes	Bacilli	Lactobacillales	Lactobacillaceae	Lactobacillus	Lactobacillus_murinus
Otu004391	2	0	2	0	0	0	0	0	0	0	0.002853	0	0	0	0	0	0	Bacteria	Bacteroidetes	Bacteroidia	Bacteroidales	Muribaculaceae
Otu004395	2	0	0	0	0	1	0	0	1	0	0	0	0	0.001543	0	0	0.001896	Bacteria	Bacteroidetes	Bacteroidia	Bacteroidales	Muribaculaceae
Otu004400	2	0	0	0	0	0	2	0	0	0	0	0	0	0	0.003944	0	0	Bacteria	Firmicutes	Clostridia	Clostridiales	Lachnospiraceae
Otu004408	2	1	0	0	1	0	0	0	0	0.001792	0	0	0.001626	0	0	0	0	Bacteria	Firmicutes	Bacilli	Lactobacillales	Streptococcaceae	Streptococcus	Streptococcus_danieliae
Otu004411	2	1	0	0	0	1	0	0	0	0.001792	0	0	0	0.001543	0	0	0	Bacteria	Firmicutes	Bacilli	Lactobacillales	Lactobacillaceae	Lactobacillus	Lactobacillus_johnsonii_FI9785
Otu004423	2	1	0	0	0	1	0	0	0	0.001792	0	0	0	0.001543	0	0	0	Bacteria	Firmicutes	Bacilli	Lactobacillales	Lactobacillaceae	Lactobacillus
Otu004430	2	0	0	1	1	0	0	0	0	0	0	0.001765	0.001626	0	0	0	0	Bacteria	Firmicutes	Bacilli	Lactobacillales	Lactobacillaceae	Lactobacillus
Otu004450	2	0	0	0	0	1	0	0	1	0	0	0	0	0.001543	0	0	0.001896	Bacteria	Bacteroidetes	Bacteroidia	Bacteroidales	Muribaculaceae
Otu004455	2	1	0	0	1	0	0	0	0	0.001792	0	0	0.001626	0	0	0	0	Bacteria	Firmicutes	Bacilli	Lactobacillales	Lactobacillaceae	Lactobacillus
Otu004457	2	0	2	0	0	0	0	0	0	0	0.002853	0	0	0	0	0	0	Bacteria	Proteobacteria	Gammaproteobacteria	Enterobacteriales	Enterobacteriaceae	Klebsiella
Otu004462	2	0	1	0	1	0	0	0	0	0	0.001426	0	0.001626	0	0	0	0	Bacteria	Verrucomicrobia	Verrucomicrobiae	Verrucomicrobiales	Akkermansiaceae	Akkermansia	Akkermansia_muciniphila
Otu004489	2	0	0	0	0	2	0	0	0	0	0	0	0	0.003086	0	0	0	Bacteria	Bacteroidetes	Bacteroidia	Bacteroidales	Muribaculaceae
Otu004532	2	1	0	0	1	0	0	0	0	0.001792	0	0	0.001626	0	0	0	0	Bacteria	Firmicutes	Bacilli	Lactobacillales	Lactobacillaceae	Lactobacillus
Otu004545	2	0	0	0	0	0	1	0	1	0	0	0	0	0	0.001972	0	0.001896	Bacteria	Bacteroidetes	Bacteroidia	Bacteroidales	Rikenellaceae	Alistipes
Otu004564	2	0	0	0	2	0	0	0	0	0	0	0	0.003252	0	0	0	0	Bacteria	Firmicutes	Bacilli	Lactobacillales	Lactobacillaceae	Lactobacillus
Otu004567	2	1	0	0	0	0	1	0	0	0.001792	0	0	0	0	0.001972	0	0	Bacteria	Firmicutes	Bacilli	Lactobacillales	Lactobacillaceae	Lactobacillus
Otu004572	2	1	0	1	0	0	0	0	0	0.001792	0	0.001765	0	0	0	0	0	Bacteria	Firmicutes	Bacilli	Lactobacillales	Lactobacillaceae	Lactobacillus
Otu004599	2	0	0	1	1	0	0	0	0	0	0	0.001765	0.001626	0	0	0	0	Bacteria	Firmicutes	Bacilli	Lactobacillales	Lactobacillaceae	Lactobacillus
Otu004602	2	0	2	0	0	0	0	0	0	0	0.002853	0	0	0	0	0	0	Bacteria	Verrucomicrobia	Verrucomicrobiae	Verrucomicrobiales	Akkermansiaceae	Akkermansia	Akkermansia_muciniphila
Otu004610	2	0	0	2	0	0	0	0	0	0	0	0.00353	0	0	0	0	0	Bacteria	Proteobacteria	Gammaproteobacteria	Betaproteobacteriales	Burkholderiaceae	Limnobacter
Otu004612	2	2	0	0	0	0	0	0	0	0.003584	0	0	0	0	0	0	0	Bacteria	Firmicutes	Bacilli	Lactobacillales	Lactobacillaceae	Lactobacillus
Otu004631	2	1	0	0	1	0	0	0	0	0.001792	0	0	0.001626	0	0	0	0	Bacteria	Firmicutes	Bacilli	Lactobacillales	Lactobacillaceae	Lactobacillus
Otu004635	2	1	0	0	1	0	0	0	0	0.001792	0	0	0.001626	0	0	0	0	Bacteria	Firmicutes	Bacilli	Lactobacillales	Lactobacillaceae	Lactobacillus	Lactobacillus_gasseri
Otu004638	2	1	0	0	1	0	0	0	0	0.001792	0	0	0.001626	0	0	0	0	Bacteria	Firmicutes	Bacilli	Lactobacillales	Lactobacillaceae	Lactobacillus
Otu004648	2	1	0	0	0	0	0	1	0	0.001792	0	0	0	0	0	0.001837	0	Bacteria	Firmicutes	Bacilli	Lactobacillales	Lactobacillaceae	Lactobacillus
Otu004662	2	0	0	0	0	2	0	0	0	0	0	0	0	0.003086	0	0	0	Bacteria	Proteobacteria	Deltaproteobacteria	Desulfovibrionales	Desulfovibrionaceae	Desulfovibrio
Otu004666	2	0	1	0	0	1	0	0	0	0	0.001426	0	0	0.001543	0	0	0	Bacteria	Bacteroidetes	Bacteroidia	Bacteroidales
Otu004669	2	0	0	0	1	0	1	0	0	0	0	0	0.001626	0	0.001972	0	0	Bacteria	Firmicutes	Bacilli	Lactobacillales	Lactobacillaceae	Lactobacillus	Lactobacillus_murinus
Otu004701	2	2	0	0	0	0	0	0	0	0.003584	0	0	0	0	0	0	0	Bacteria	Firmicutes	Bacilli	Lactobacillales	Lactobacillaceae	Lactobacillus	Lactobacillus_murinus
Otu004702	2	0	0	0	0	1	0	0	1	0	0	0	0	0.001543	0	0	0.001896	Bacteria	Bacteroidetes	Bacteroidia	Bacteroidales	Prevotellaceae
Otu004706	2	2	0	0	0	0	0	0	0	0.003584	0	0	0	0	0	0	0	Bacteria	Firmicutes	Bacilli	Lactobacillales	Lactobacillaceae	Lactobacillus
Otu004727	2	1	0	0	1	0	0	0	0	0.001792	0	0	0.001626	0	0	0	0	Bacteria	Firmicutes	Bacilli	Lactobacillales	Streptococcaceae	Streptococcus	Streptococcus_danieliae
Otu004843	2	0	0	0	0	0	2	0	0	0	0	0	0	0	0.003944	0	0	Bacteria	Firmicutes	Clostridia	Clostridiales	Ruminococcaceae	Flavonifractor
Otu004856	2	0	0	0	2	0	0	0	0	0	0	0	0.003252	0	0	0	0	Bacteria	Firmicutes	Bacilli	Lactobacillales	Lactobacillaceae	Lactobacillus
Otu004859	2	0	0	0	0	1	0	0	1	0	0	0	0	0.001543	0	0	0.001896	Bacteria	Bacteroidetes	Bacteroidia	Bacteroidales	Muribaculaceae
Otu004904	2	0	0	1	1	0	0	0	0	0	0	0.001765	0.001626	0	0	0	0	Bacteria	Firmicutes	Bacilli	Lactobacillales	Lactobacillaceae	Lactobacillus
Otu004913	2	0	0	0	0	0	1	1	0	0	0	0	0	0	0.001972	0.001837	0	Bacteria	Actinobacteria	Coriobacteriia	Coriobacteriales	Eggerthellaceae	Enterorhabdus	Enterorhabdus_caecimuris_B7
Otu004934	2	0	0	0	0	0	0	0	2	0	0	0	0	0	0	0	0.003792	Bacteria	Planctomycetes	Phycisphaerae	Tepidisphaerales	WD2101_soil_group
Otu004946	2	0	0	0	1	0	0	1	0	0	0	0	0.001626	0	0	0.001837	0	Bacteria	Bacteroidetes	Bacteroidia	Bacteroidales	Muribaculaceae
Otu004948	2	0	0	0	0	0	2	0	0	0	0	0	0	0	0.003944	0	0	Bacteria	Firmicutes	Clostridia	Clostridiales	Ruminococcaceae	Flavonifractor	Flavonifractor_plautii
Otu004971	2	0	0	0	0	1	0	1	0	0	0	0	0	0.001543	0	0.001837	0	Bacteria	Firmicutes	Clostridia	Clostridiales	Lachnospiraceae
Otu004985	2	0	0	1	1	0	0	0	0	0	0	0.001765	0.001626	0	0	0	0	Bacteria	Firmicutes	Bacilli	Lactobacillales	Lactobacillaceae	Lactobacillus
Otu004995	2	0	0	0	0	0	0	0	2	0	0	0	0	0	0	0	0.003792	Bacteria	Bacteroidetes	Bacteroidia	Bacteroidales
Otu005006	2	0	0	0	0	0	2	0	0	0	0	0	0	0	0.003944	0	0	Bacteria	Firmicutes	Clostridia	Clostridiales	Lachnospiraceae
Otu005014	2	0	0	0	0	2	0	0	0	0	0	0	0	0.003086	0	0	0	Bacteria	Firmicutes	Clostridia	Clostridiales	Lachnospiraceae
Otu005037	2	0	0	1	1	0	0	0	0	0	0	0.001765	0.001626	0	0	0	0	Bacteria	Firmicutes	Bacilli	Lactobacillales	Lactobacillaceae	Lactobacillus
Otu005046	2	0	0	0	2	0	0	0	0	0	0	0	0.003252	0	0	0	0	Bacteria	Firmicutes	Bacilli	Lactobacillales	Lactobacillaceae	Lactobacillus
Otu005047	2	0	0	0	0	2	0	0	0	0	0	0	0	0.003086	0	0	0	Bacteria	Firmicutes	Bacilli	Lactobacillales	Lactobacillaceae	Lactobacillus
Otu005058	2	0	2	0	0	0	0	0	0	0	0.002853	0	0	0	0	0	0	Bacteria	Bacteroidetes	Bacteroidia	Bacteroidales	Bacteroidaceae	Bacteroides
Otu005078	2	0	0	0	1	0	1	0	0	0	0	0	0.001626	0	0.001972	0	0	Bacteria	Proteobacteria	Gammaproteobacteria	Pseudomonadales	Pseudomonadaceae	Pseudomonas
Otu005082	2	0	0	2	0	0	0	0	0	0	0	0.00353	0	0	0	0	0	Bacteria	Firmicutes	Bacilli	Lactobacillales	Lactobacillaceae	Lactobacillus	Lactobacillus_murinus
Otu005089	2	0	0	0	0	2	0	0	0	0	0	0	0	0.003086	0	0	0	Bacteria	Firmicutes	Clostridia	Clostridiales	Lachnospiraceae
Otu005112	2	2	0	0	0	0	0	0	0	0.003584	0	0	0	0	0	0	0	Bacteria	Acidobacteria	Acidobacteriia	Solibacterales	Solibacteraceae_Subgroup_3
Otu005133	2	0	2	0	0	0	0	0	0	0	0.002853	0	0	0	0	0	0	Bacteria	Verrucomicrobia	Verrucomicrobiae	Verrucomicrobiales	Akkermansiaceae	Akkermansia	Akkermansia_muciniphila
Otu005143	2	0	0	0	0	0	0	0	2	0	0	0	0	0	0	0	0.003792	Bacteria	Gemmatimonadetes	Gemmatimonadetes	Gemmatimonadales	Gemmatimonadaceae
Otu005144	2	0	2	0	0	0	0	0	0	0	0.002853	0	0	0	0	0	0	Bacteria	Bacteroidetes	Bacteroidia	Bacteroidales
Otu005150	2	0	0	0	0	1	0	1	0	0	0	0	0	0.001543	0	0.001837	0	Bacteria	Firmicutes	Clostridia	Clostridiales	Lachnospiraceae
Otu005224	2	2	0	0	0	0	0	0	0	0.003584	0	0	0	0	0	0	0	Bacteria	Firmicutes	Bacilli	Lactobacillales	Lactobacillaceae	Lactobacillus
Otu005227	2	0	0	1	0	0	1	0	0	0	0	0.001765	0	0	0.001972	0	0	Bacteria	Firmicutes	Bacilli	Lactobacillales	Lactobacillaceae	Lactobacillus
Otu005234	2	0	2	0	0	0	0	0	0	0	0.002853	0	0	0	0	0	0	Bacteria	Cyanobacteria	Melainabacteria	Gastranaerophilales	Candidatus_Gastranaerophilales_bacterium_Zag_111
Otu005241	2	0	0	0	0	0	2	0	0	0	0	0	0	0	0.003944	0	0	Bacteria	Actinobacteria	Actinobacteria	Propionibacteriales	Nocardioidaceae
Otu005247	2	0	0	0	0	0	0	0	2	0	0	0	0	0	0	0	0.003792	Bacteria	Bacteroidetes	Bacteroidia	Bacteroidales	Prevotellaceae
Otu005257	2	2	0	0	0	0	0	0	0	0.003584	0	0	0	0	0	0	0	Bacteria	Proteobacteria	Gammaproteobacteria	Enterobacteriales	Enterobacteriaceae
Otu005278	2	2	0	0	0	0	0	0	0	0.003584	0	0	0	0	0	0	0	Bacteria	Firmicutes	Bacilli	Lactobacillales	Lactobacillaceae	Lactobacillus
Otu005285	2	0	0	0	0	0	0	0	2	0	0	0	0	0	0	0	0.003792	Bacteria	Chlamydiae	Chlamydiae	Chlamydiales
Otu005288	2	1	0	1	0	0	0	0	0	0.001792	0	0.001765	0	0	0	0	0	Bacteria	Firmicutes	Bacilli	Lactobacillales	Lactobacillaceae	Lactobacillus
Otu005292	2	0	0	1	1	0	0	0	0	0	0	0.001765	0.001626	0	0	0	0	Bacteria	Firmicutes	Bacilli	Lactobacillales	Lactobacillaceae	Lactobacillus	Lactobacillus_murinus
Otu005310	2	0	0	0	0	0	0	1	1	0	0	0	0	0	0	0.001837	0.001896	Bacteria	Bacteroidetes	Bacteroidia	Bacteroidales	Muribaculaceae
Otu005311	2	2	0	0	0	0	0	0	0	0.003584	0	0	0	0	0	0	0	Bacteria	Firmicutes	Bacilli	Lactobacillales	Lactobacillaceae	Lactobacillus	Lactobacillus_gasseri
Otu005333	2	0	0	0	0	1	0	1	0	0	0	0	0	0.001543	0	0.001837	0	Bacteria	Bacteroidetes	Bacteroidia	Bacteroidales	Muribaculaceae
Otu005339	2	2	0	0	0	0	0	0	0	0.003584	0	0	0	0	0	0	0	Bacteria
Otu005345	2	1	0	1	0	0	0	0	0	0.001792	0	0.001765	0	0	0	0	0	Bacteria	Firmicutes	Bacilli	Lactobacillales	Lactobacillaceae	Lactobacillus
Otu005352	2	0	0	1	0	0	0	1	0	0	0	0.001765	0	0	0	0.001837	0	Bacteria	Firmicutes	Bacilli	Lactobacillales	Lactobacillaceae	Lactobacillus
Otu005355	2	1	0	0	1	0	0	0	0	0.001792	0	0	0.001626	0	0	0	0	Bacteria	Firmicutes	Bacilli	Lactobacillales	Lactobacillaceae	Lactobacillus
Otu005365	2	0	0	0	0	1	1	0	0	0	0	0	0	0.001543	0.001972	0	0	Bacteria	Firmicutes	Clostridia	Clostridiales	Ruminococcaceae
Otu005372	2	1	0	0	1	0	0	0	0	0.001792	0	0	0.001626	0	0	0	0	Bacteria	Firmicutes	Bacilli	Lactobacillales	Lactobacillaceae	Lactobacillus	Lactobacillus_murinus
Otu005392	2	1	0	1	0	0	0	0	0	0.001792	0	0.001765	0	0	0	0	0	Bacteria	Firmicutes	Bacilli	Lactobacillales	Streptococcaceae	Streptococcus
Otu005404	2	0	0	0	0	1	0	0	1	0	0	0	0	0.001543	0	0	0.001896	Bacteria	Bacteroidetes	Bacteroidia	Bacteroidales	Prevotellaceae
Otu005443	2	0	0	0	0	0	2	0	0	0	0	0	0	0	0.003944	0	0	Bacteria	Firmicutes	Erysipelotrichia	Erysipelotrichales	Erysipelotrichaceae
Otu005457	2	0	0	1	1	0	0	0	0	0	0	0.001765	0.001626	0	0	0	0	Bacteria	Cyanobacteria	Oxyphotobacteria	Chloroplast
Otu005493	2	0	2	0	0	0	0	0	0	0	0.002853	0	0	0	0	0	0	Bacteria
Otu005513	2	0	0	0	0	0	0	0	2	0	0	0	0	0	0	0	0.003792	Bacteria	Actinobacteria	Thermoleophilia	Solirubrobacterales
Otu005540	2	2	0	0	0	0	0	0	0	0.003584	0	0	0	0	0	0	0	Bacteria	Firmicutes	Bacilli	Lactobacillales	Lactobacillaceae	Lactobacillus
Otu005552	2	2	0	0	0	0	0	0	0	0.003584	0	0	0	0	0	0	0	Bacteria	Firmicutes	Bacilli	Lactobacillales	Lactobacillaceae	Lactobacillus
Otu005585	2	1	0	1	0	0	0	0	0	0.001792	0	0.001765	0	0	0	0	0	Bacteria	Firmicutes	Bacilli	Lactobacillales	Lactobacillaceae	Lactobacillus
Otu005589	2	0	0	0	0	2	0	0	0	0	0	0	0	0.003086	0	0	0	Bacteria
Otu005611	2	0	0	1	1	0	0	0	0	0	0	0.001765	0.001626	0	0	0	0	Bacteria	Firmicutes	Bacilli	Lactobacillales	Lactobacillaceae	Lactobacillus	Lactobacillus_murinus
Otu005612	2	0	0	0	0	1	0	0	1	0	0	0	0	0.001543	0	0	0.001896	Bacteria	Bacteroidetes	Bacteroidia	Bacteroidales	Muribaculaceae
Otu005616	2	0	0	0	0	0	2	0	0	0	0	0	0	0	0.003944	0	0	Bacteria	Proteobacteria	Gammaproteobacteria	Enterobacteriales	Enterobacteriaceae
Otu005652	2	0	0	0	0	1	0	1	0	0	0	0	0	0.001543	0	0.001837	0	Bacteria	Firmicutes	Clostridia	Clostridiales	Lachnospiraceae
Otu005655	2	0	0	0	0	1	0	1	0	0	0	0	0	0.001543	0	0.001837	0	Bacteria	Firmicutes	Clostridia	Clostridiales	Lachnospiraceae
Otu005659	2	0	2	0	0	0	0	0	0	0	0.002853	0	0	0	0	0	0	Bacteria	Verrucomicrobia	Verrucomicrobiae	Verrucomicrobiales	Akkermansiaceae	Akkermansia	Akkermansia_muciniphila
Otu005666	2	0	2	0	0	0	0	0	0	0	0.002853	0	0	0	0	0	0	Bacteria	Bacteroidetes	Bacteroidia	Bacteroidales	Bacteroidaceae	Bacteroides
Otu005676	2	0	0	1	1	0	0	0	0	0	0	0.001765	0.001626	0	0	0	0	Bacteria	Firmicutes	Bacilli	Lactobacillales	Lactobacillaceae	Lactobacillus
Otu005749	2	0	0	0	2	0	0	0	0	0	0	0	0.003252	0	0	0	0	Bacteria	Firmicutes	Bacilli	Lactobacillales	Lactobacillaceae	Lactobacillus
Otu005754	2	0	0	0	2	0	0	0	0	0	0	0	0.003252	0	0	0	0	Bacteria	Firmicutes	Bacilli	Lactobacillales	Lactobacillaceae	Lactobacillus
Otu005760	2	1	0	0	0	0	0	1	0	0.001792	0	0	0	0	0	0.001837	0	Bacteria	Firmicutes	Bacilli	Lactobacillales	Lactobacillaceae	Lactobacillus
Otu005764	2	0	0	0	0	0	1	1	0	0	0	0	0	0	0.001972	0.001837	0	Bacteria	Proteobacteria	Alphaproteobacteria	Elsterales
Otu005769	2	0	0	0	0	1	0	1	0	0	0	0	0	0.001543	0	0.001837	0	Bacteria	Bacteroidetes	Bacteroidia	Bacteroidales	Muribaculaceae
Otu005771	2	1	0	0	1	0	0	0	0	0.001792	0	0	0.001626	0	0	0	0	Bacteria	Firmicutes	Bacilli	Lactobacillales	Lactobacillaceae	Lactobacillus	Lactobacillus_murinus
Otu005773	2	0	0	0	0	0	1	0	1	0	0	0	0	0	0.001972	0	0.001896	Bacteria	Bacteroidetes	Bacteroidia	Bacteroidales	Rikenellaceae	Alistipes
Otu005780	2	0	2	0	0	0	0	0	0	0	0.002853	0	0	0	0	0	0	Bacteria	Firmicutes	Clostridia	Clostridiales	Lachnospiraceae	Blautia	bacterium_NLAE-zl-H10
Otu005808	2	2	0	0	0	0	0	0	0	0.003584	0	0	0	0	0	0	0	Bacteria	Actinobacteria	Actinobacteria	Micrococcales	Microbacteriaceae
Otu005833	2	2	0	0	0	0	0	0	0	0.003584	0	0	0	0	0	0	0	Bacteria	Planctomycetes	Planctomycetacia	Gemmatales	Gemmataceae	Fimbriiglobus
Otu005844	2	0	0	1	1	0	0	0	0	0	0	0.001765	0.001626	0	0	0	0	Bacteria	Firmicutes	Bacilli	Lactobacillales	Lactobacillaceae	Lactobacillus	Lactobacillus_murinus
Otu005856	2	0	0	2	0	0	0	0	0	0	0	0.00353	0	0	0	0	0	Bacteria	Firmicutes	Bacilli	Lactobacillales	Lactobacillaceae	Lactobacillus
Otu005863	2	0	0	0	0	0	2	0	0	0	0	0	0	0	0.003944	0	0	Bacteria	Firmicutes	Clostridia	Clostridiales	Lachnospiraceae
Otu005864	2	0	2	0	0	0	0	0	0	0	0.002853	0	0	0	0	0	0	Bacteria	Bacteroidetes	Bacteroidia	Bacteroidales
Otu005867	2	2	0	0	0	0	0	0	0	0.003584	0	0	0	0	0	0	0	Bacteria	Firmicutes	Bacilli	Lactobacillales	Lactobacillaceae	Lactobacillus
Otu005870	2	0	0	0	0	1	1	0	0	0	0	0	0	0.001543	0.001972	0	0	Bacteria	Deferribacteres	Deferribacteres	Deferribacterales	Deferribacteraceae	Mucispirillum	Mucispirillum_schaedleri_ASF457
Otu005957	2	2	0	0	0	0	0	0	0	0.003584	0	0	0	0	0	0	0	Bacteria	Proteobacteria	Gammaproteobacteria	Pseudomonadales	Pseudomonadaceae	Pseudomonas
Otu005960	2	2	0	0	0	0	0	0	0	0.003584	0	0	0	0	0	0	0	Bacteria	Firmicutes	Bacilli	Lactobacillales	Lactobacillaceae	Lactobacillus
Otu005967	2	0	0	0	0	0	0	0	2	0	0	0	0	0	0	0	0.003792	Bacteria	Bacteroidetes	Bacteroidia	Bacteroidales	Muribaculaceae
Otu005975	2	1	0	0	0	0	1	0	0	0.001792	0	0	0	0	0.001972	0	0	Bacteria	Firmicutes	Bacilli	Lactobacillales	Lactobacillaceae	Lactobacillus
Otu005978	2	1	0	1	0	0	0	0	0	0.001792	0	0.001765	0	0	0	0	0	Bacteria	Firmicutes	Bacilli	Lactobacillales	Streptococcaceae	Streptococcus	Streptococcus_danieliae
Otu005979	2	2	0	0	0	0	0	0	0	0.003584	0	0	0	0	0	0	0	Bacteria	Bacteroidetes	Bacteroidia	Cytophagales	Spirosomaceae	Spirosoma
Otu005989	2	0	2	0	0	0	0	0	0	0	0.002853	0	0	0	0	0	0	Bacteria	Bacteroidetes	Bacteroidia	Bacteroidales	Rikenellaceae	Alistipes
Otu005994	2	1	0	0	1	0	0	0	0	0.001792	0	0	0.001626	0	0	0	0	Bacteria	Firmicutes	Bacilli	Lactobacillales	Lactobacillaceae	Lactobacillus
Otu006024	2	0	0	0	2	0	0	0	0	0	0	0	0.003252	0	0	0	0	Bacteria	Actinobacteria	Actinobacteria	Pseudonocardiales	Pseudonocardiaceae	Pseudonocardia
Otu006046	2	0	0	1	0	0	0	0	1	0	0	0.001765	0	0	0	0	0.001896	Bacteria	Firmicutes	Bacilli	Lactobacillales	Lactobacillaceae	Lactobacillus
Otu006058	2	0	0	0	0	0	0	0	2	0	0	0	0	0	0	0	0.003792	Bacteria	Planctomycetes	Planctomycetacia	Pirellulales	Pirellulaceae	Rhodopirellula	planctomycete_str_610
Otu006067	2	0	0	0	0	0	2	0	0	0	0	0	0	0	0.003944	0	0	Bacteria	Bacteroidetes	Bacteroidia	Bacteroidales	Muribaculaceae
Otu006074	2	0	0	0	0	1	0	0	1	0	0	0	0	0.001543	0	0	0.001896	Bacteria	Bacteroidetes	Bacteroidia	Bacteroidales	Tannerellaceae	Parabacteroides
Otu006086	2	2	0	0	0	0	0	0	0	0.003584	0	0	0	0	0	0	0	Bacteria	Firmicutes	Bacilli	Lactobacillales	Lactobacillaceae	Lactobacillus
Otu006092	2	0	0	0	0	1	0	0	1	0	0	0	0	0.001543	0	0	0.001896	Bacteria	Bacteroidetes	Bacteroidia	Bacteroidales	Muribaculaceae
Otu006114	2	0	0	0	0	2	0	0	0	0	0	0	0	0.003086	0	0	0	Bacteria	Actinobacteria	Thermoleophilia	Gaiellales
Otu006123	2	1	0	1	0	0	0	0	0	0.001792	0	0.001765	0	0	0	0	0	Bacteria	Firmicutes	Bacilli	Lactobacillales	Lactobacillaceae	Lactobacillus	Lactobacillus_murinus
Otu006124	2	0	0	0	0	2	0	0	0	0	0	0	0	0.003086	0	0	0	Bacteria	Firmicutes	Clostridia	Clostridiales	Lachnospiraceae
Otu006191	2	0	0	0	0	2	0	0	0	0	0	0	0	0.003086	0	0	0	Bacteria	Actinobacteria	Thermoleophilia	Gaiellales
Otu006192	2	0	0	0	0	1	0	1	0	0	0	0	0	0.001543	0	0.001837	0	Bacteria	Firmicutes	Clostridia	Clostridiales	Lachnospiraceae
Otu006198	2	0	0	0	1	1	0	0	0	0	0	0	0.001626	0.001543	0	0	0	Bacteria	Bacteroidetes	Bacteroidia	Bacteroidales	Muribaculaceae
Otu006203	2	1	0	1	0	0	0	0	0	0.001792	0	0.001765	0	0	0	0	0	Bacteria	Firmicutes	Bacilli	Lactobacillales	Lactobacillaceae	Lactobacillus	Lactobacillus_murinus
Otu006209	2	0	0	0	0	0	2	0	0	0	0	0	0	0	0.003944	0	0	Bacteria	Firmicutes	Clostridia	Clostridiales	Ruminococcaceae	Flavonifractor
Otu006262	2	1	0	0	1	0	0	0	0	0.001792	0	0	0.001626	0	0	0	0	Bacteria	Firmicutes	Bacilli	Lactobacillales	Lactobacillaceae	Lactobacillus	Lactobacillus_murinus
Otu006283	2	0	0	0	0	0	2	0	0	0	0	0	0	0	0.003944	0	0	Bacteria	Chloroflexi	Anaerolineae	Anaerolineales	Anaerolineaceae
Otu006295	2	0	0	0	0	0	2	0	0	0	0	0	0	0	0.003944	0	0	Bacteria	Chloroflexi	Anaerolineae
Otu006302	2	1	0	0	1	0	0	0	0	0.001792	0	0	0.001626	0	0	0	0	Bacteria	Firmicutes	Bacilli	Lactobacillales	Lactobacillaceae	Lactobacillus	Lactobacillus_murinus
Otu006350	2	0	0	0	0	0	0	0	2	0	0	0	0	0	0	0	0.003792	Bacteria	Bacteroidetes	Bacteroidia	Bacteroidales
Otu006353	2	0	0	0	0	2	0	0	0	0	0	0	0	0.003086	0	0	0	Bacteria
Otu006356	2	2	0	0	0	0	0	0	0	0.003584	0	0	0	0	0	0	0	Bacteria	Firmicutes	Bacilli	Lactobacillales	Lactobacillaceae	Lactobacillus
Otu006366	2	2	0	0	0	0	0	0	0	0.003584	0	0	0	0	0	0	0	Bacteria	Actinobacteria	Actinobacteria	Frankiales	Geodermatophilaceae	Geodermatophilus
Otu006374	2	0	0	0	0	1	0	1	0	0	0	0	0	0.001543	0	0.001837	0	Bacteria	Bacteroidetes	Bacteroidia	Bacteroidales	Muribaculaceae
Otu006375	2	0	0	0	1	0	0	0	1	0	0	0	0.001626	0	0	0	0.001896	Bacteria	Bacteroidetes	Bacteroidia	Bacteroidales	Prevotellaceae
Otu006421	2	0	0	0	0	1	0	1	0	0	0	0	0	0.001543	0	0.001837	0	Bacteria	Firmicutes	Clostridia	Clostridiales	Lachnospiraceae
Otu006422	2	1	0	0	1	0	0	0	0	0.001792	0	0	0.001626	0	0	0	0	Bacteria	Firmicutes	Bacilli	Lactobacillales	Lactobacillaceae	Lactobacillus	Lactobacillus_murinus
Otu006429	2	1	0	1	0	0	0	0	0	0.001792	0	0.001765	0	0	0	0	0	Bacteria	Firmicutes	Bacilli	Lactobacillales	Streptococcaceae	Streptococcus	Streptococcus_danieliae
Otu006433	2	1	0	0	1	0	0	0	0	0.001792	0	0	0.001626	0	0	0	0	Bacteria	Firmicutes	Bacilli	Lactobacillales	Lactobacillaceae	Lactobacillus
Otu006437	2	0	0	0	0	0	0	0	2	0	0	0	0	0	0	0	0.003792	Bacteria
Otu006465	2	0	0	0	0	1	1	0	0	0	0	0	0	0.001543	0.001972	0	0	Bacteria	Firmicutes	Clostridia	Clostridiales	Lachnospiraceae
Otu006473	2	0	0	0	0	0	2	0	0	0	0	0	0	0	0.003944	0	0	Bacteria	Firmicutes	Clostridia	Clostridiales	Lachnospiraceae	ASF356
Otu006477	2	0	0	1	1	0	0	0	0	0	0	0.001765	0.001626	0	0	0	0	Bacteria	Firmicutes	Bacilli	Lactobacillales	Lactobacillaceae	Lactobacillus	Lactobacillus_murinus
Otu006480	2	0	2	0	0	0	0	0	0	0	0.002853	0	0	0	0	0	0	Bacteria	Firmicutes	Clostridia	Clostridiales	Lachnospiraceae	Lachnoclostridium
Otu006512	2	0	0	0	0	1	0	1	0	0	0	0	0	0.001543	0	0.001837	0	Bacteria	Bacteroidetes	Bacteroidia	Bacteroidales	Muribaculaceae
Otu006515	2	0	0	1	0	0	1	0	0	0	0	0.001765	0	0	0.001972	0	0	Bacteria	Firmicutes	Bacilli	Lactobacillales	Lactobacillaceae	Lactobacillus	Lactobacillus_murinus
Otu006524	2	0	0	1	0	0	0	0	1	0	0	0.001765	0	0	0	0	0.001896	Bacteria	Firmicutes	Bacilli	Lactobacillales	Lactobacillaceae	Lactobacillus	Lactobacillus_murinus
Otu006535	2	1	0	0	0	0	1	0	0	0.001792	0	0	0	0	0.001972	0	0	Bacteria	Firmicutes	Bacilli	Lactobacillales	Lactobacillaceae	Lactobacillus	Lactobacillus_murinus
Otu006559	2	0	0	0	0	0	0	0	2	0	0	0	0	0	0	0	0.003792	Bacteria	Actinobacteria	Actinobacteria	Corynebacteriales	Mycobacteriaceae	Mycobacterium
Otu006579	2	0	0	1	1	0	0	0	0	0	0	0.001765	0.001626	0	0	0	0	Bacteria	Firmicutes	Bacilli	Lactobacillales	Lactobacillaceae	Lactobacillus	Lactobacillus_gasseri
Otu006580	2	0	0	0	0	0	0	0	2	0	0	0	0	0	0	0	0.003792	Bacteria
Otu006633	2	0	0	0	0	2	0	0	0	0	0	0	0	0.003086	0	0	0	Bacteria	Firmicutes	Clostridia	Clostridiales	Lachnospiraceae
Otu006681	2	0	0	0	2	0	0	0	0	0	0	0	0.003252	0	0	0	0	Bacteria	Firmicutes	Bacilli	Lactobacillales	Lactobacillaceae	Lactobacillus
Otu006693	2	0	2	0	0	0	0	0	0	0	0.002853	0	0	0	0	0	0	Bacteria	Verrucomicrobia	Verrucomicrobiae	Verrucomicrobiales	Akkermansiaceae	Akkermansia	Akkermansia_muciniphila
Otu006714	2	0	0	0	0	0	0	1	1	0	0	0	0	0	0	0.001837	0.001896	Bacteria	Bacteroidetes	Bacteroidia	Bacteroidales	Prevotellaceae	Alloprevotella
Otu006723	2	0	0	1	1	0	0	0	0	0	0	0.001765	0.001626	0	0	0	0	Bacteria	Cyanobacteria	Oxyphotobacteria	Chloroplast
Otu006725	2	0	0	0	0	0	0	1	1	0	0	0	0	0	0	0.001837	0.001896	Bacteria	Bacteroidetes	Bacteroidia	Bacteroidales	Muribaculaceae
Otu006734	2	0	0	0	1	0	1	0	0	0	0	0	0.001626	0	0.001972	0	0	Bacteria	Firmicutes	Bacilli	Lactobacillales	Lactobacillaceae	Lactobacillus	Lactobacillus_murinus
Otu006735	2	0	0	0	0	1	0	1	0	0	0	0	0	0.001543	0	0.001837	0	Bacteria	Bacteroidetes	Bacteroidia	Bacteroidales
Otu006764	2	0	0	0	2	0	0	0	0	0	0	0	0.003252	0	0	0	0	Bacteria	Bacteroidetes	Bacteroidia	Cytophagales	Hymenobacteraceae	Hymenobacter
Otu006774	2	0	0	1	1	0	0	0	0	0	0	0.001765	0.001626	0	0	0	0	Bacteria	Firmicutes	Bacilli	Lactobacillales	Lactobacillaceae	Lactobacillus	Lactobacillus_gasseri
Otu006791	2	0	0	0	0	1	0	0	1	0	0	0	0	0.001543	0	0	0.001896	Bacteria	Bacteroidetes	Bacteroidia	Bacteroidales	Prevotellaceae
Otu006823	2	0	0	0	0	0	0	0	2	0	0	0	0	0	0	0	0.003792	Bacteria	Bacteroidetes	Bacteroidia	Bacteroidales	Prevotellaceae	Alloprevotella
Otu006842	2	0	0	0	2	0	0	0	0	0	0	0	0.003252	0	0	0	0	Bacteria	Bacteroidetes	Bacteroidia	Chitinophagales	Chitinophagaceae
Otu006847	2	0	0	2	0	0	0	0	0	0	0	0.00353	0	0	0	0	0	Bacteria	Planctomycetes	Phycisphaerae	Tepidisphaerales	WD2101_soil_group
Otu006871	2	0	0	0	0	1	0	1	0	0	0	0	0	0.001543	0	0.001837	0	Bacteria	Bacteroidetes	Bacteroidia	Bacteroidales	Muribaculaceae
Otu006880	2	0	0	0	0	0	2	0	0	0	0	0	0	0	0.003944	0	0	Bacteria	Firmicutes	Clostridia	Clostridiales	Lachnospiraceae
Otu006884	2	2	0	0	0	0	0	0	0	0.003584	0	0	0	0	0	0	0	Bacteria	Proteobacteria	Gammaproteobacteria	Oceanospirillales	Nitrincolaceae	Neptuniibacter	bacterium_IS6
Otu006885	2	0	0	1	1	0	0	0	0	0	0	0.001765	0.001626	0	0	0	0	Bacteria	Firmicutes	Bacilli	Lactobacillales	Lactobacillaceae	Lactobacillus
Otu006895	2	0	0	0	0	0	2	0	0	0	0	0	0	0	0.003944	0	0	Bacteria	Actinobacteria	Actinobacteria	Micrococcales	Intrasporangiaceae
Otu000143	1	0	0	0	1	0	0	0	0	0	0	0	0.001626	0	0	0	0	Bacteria	Patescibacteria	Saccharimonadia	Saccharimonadales
Otu000203	1	0	0	0	0	0	0	0	1	0	0	0	0	0	0	0	0.001896	Bacteria	Firmicutes	Clostridia	Clostridiales	Ruminococcaceae	Ruminiclostridium
Otu000205	1	1	0	0	0	0	0	0	0	0.001792	0	0	0	0	0	0	0	Bacteria	Firmicutes	Clostridia	Clostridiales	Lachnospiraceae	GCA-900066575
Otu000209	1	1	0	0	0	0	0	0	0	0.001792	0	0	0	0	0	0	0	Bacteria	Proteobacteria	Deltaproteobacteria	Desulfovibrionales	Desulfovibrionaceae	Bilophila
Otu000218	1	0	0	1	0	0	0	0	0	0	0	0.001765	0	0	0	0	0	Bacteria	Firmicutes	Clostridia	Clostridiales	Lachnospiraceae
Otu000221	1	1	0	0	0	0	0	0	0	0.001792	0	0	0	0	0	0	0	Bacteria	Firmicutes	Clostridia	Clostridiales	Lachnospiraceae
Otu000249	1	0	0	1	0	0	0	0	0	0	0	0.001765	0	0	0	0	0	Bacteria	Acidobacteria	Acidobacteriia	Subgroup_2
Otu000267	1	0	0	0	1	0	0	0	0	0	0	0	0.001626	0	0	0	0	Bacteria	Firmicutes	Clostridia	Clostridiales	Lachnospiraceae
Otu000271	1	0	1	0	0	0	0	0	0	0	0.001426	0	0	0	0	0	0	Bacteria	Firmicutes	Clostridia	Clostridiales	Lachnospiraceae
Otu000296	1	0	0	0	0	0	0	0	1	0	0	0	0	0	0	0	0.001896	Bacteria
Otu000301	1	0	0	0	0	0	0	0	1	0	0	0	0	0	0	0	0.001896	Bacteria	Firmicutes	Clostridia	Clostridiales	Ruminococcaceae	Eubacterium_coprostanoligenes_group
Otu000335	1	0	1	0	0	0	0	0	0	0	0.001426	0	0	0	0	0	0	Bacteria	Firmicutes	Clostridia	Clostridiales	Lachnospiraceae
Otu000337	1	0	0	0	0	0	0	1	0	0	0	0	0	0	0	0.001837	0	Bacteria	Proteobacteria	Alphaproteobacteria	Rhizobiales	Beijerinckiaceae	Roseiarcus
Otu000351	1	0	0	0	0	0	0	0	1	0	0	0	0	0	0	0	0.001896	Bacteria	Firmicutes	Clostridia	Clostridiales	Lachnospiraceae
Otu000364	1	0	1	0	0	0	0	0	0	0	0.001426	0	0	0	0	0	0	Bacteria	Actinobacteria	Actinobacteria	Frankiales	Acidothermaceae	Acidothermus
Otu000387	1	0	0	0	0	0	0	0	1	0	0	0	0	0	0	0	0.001896	Bacteria	Bacteroidetes	Bacteroidia	Bacteroidales	Muribaculaceae
Otu000406	1	0	0	0	1	0	0	0	0	0	0	0	0.001626	0	0	0	0	Bacteria	Firmicutes	Bacilli	Lactobacillales	Carnobacteriaceae	Atopostipes
Otu000411	1	0	0	0	0	1	0	0	0	0	0	0	0	0.001543	0	0	0	Bacteria	Firmicutes	Clostridia	Clostridiales	Lachnospiraceae
Otu000430	1	0	0	0	0	0	0	0	1	0	0	0	0	0	0	0	0.001896	Bacteria	Bacteroidetes	Bacteroidia	Bacteroidales	Muribaculaceae	Muribaculum
Otu000433	1	0	0	0	0	0	0	1	0	0	0	0	0	0	0	0.001837	0	Bacteria	Firmicutes	Clostridia	Clostridiales	Lachnospiraceae
Otu000436	1	0	0	0	0	0	0	1	0	0	0	0	0	0	0	0.001837	0	Bacteria	Actinobacteria	Thermoleophilia	Gaiellales
Otu000443	1	0	0	0	1	0	0	0	0	0	0	0	0.001626	0	0	0	0	Bacteria	Bacteroidetes	Bacteroidia	Bacteroidales	Muribaculaceae
Otu000444	1	0	0	0	0	1	0	0	0	0	0	0	0	0.001543	0	0	0	Bacteria	Firmicutes	Clostridia	Clostridiales	Lachnospiraceae	Lachnospiraceae_NK4A136_group
Otu000448	1	0	0	0	0	0	0	1	0	0	0	0	0	0	0	0.001837	0	Bacteria	Actinobacteria	Actinobacteria	Streptomycetales	Streptomycetaceae
Otu000454	1	0	0	0	0	1	0	0	0	0	0	0	0	0.001543	0	0	0	Bacteria	Bacteroidetes	Bacteroidia	Bacteroidales
Otu000465	1	0	0	0	0	0	0	1	0	0	0	0	0	0	0	0.001837	0	Bacteria	Bacteroidetes	Bacteroidia	Bacteroidales	Muribaculaceae
Otu000475	1	0	0	0	0	0	0	1	0	0	0	0	0	0	0	0.001837	0	Bacteria	Bacteroidetes	Bacteroidia	Bacteroidales	Muribaculaceae
Otu000479	1	0	0	1	0	0	0	0	0	0	0	0.001765	0	0	0	0	0	Bacteria	Proteobacteria	Alphaproteobacteria	Elsterales
Otu000481	1	0	0	0	0	0	0	0	1	0	0	0	0	0	0	0	0.001896	Bacteria	Firmicutes	Clostridia	Clostridiales	Lachnospiraceae
Otu000493	1	0	0	0	0	1	0	0	0	0	0	0	0	0.001543	0	0	0	Bacteria	Firmicutes	Clostridia	Clostridiales	Ruminococcaceae
Otu000499	1	0	0	1	0	0	0	0	0	0	0	0.001765	0	0	0	0	0	Bacteria	Acidobacteria	Acidobacteriia	Acidobacteriales
Otu000510	1	0	0	0	0	0	1	0	0	0	0	0	0	0	0.001972	0	0	Bacteria	Bacteroidetes	Bacteroidia	Bacteroidales	Rikenellaceae	Alistipes	Faecalibacterium_prausnitzii
Otu000514	1	0	0	0	0	0	0	1	0	0	0	0	0	0	0	0.001837	0	Bacteria	Firmicutes	Clostridia	Clostridiales	Ruminococcaceae	Ruminococcaceae_UCG-014
Otu000523	1	0	0	0	0	0	0	1	0	0	0	0	0	0	0	0.001837	0	Bacteria	Proteobacteria	Alphaproteobacteria	Elsterales
Otu000528	1	0	0	0	1	0	0	0	0	0	0	0	0.001626	0	0	0	0	Bacteria	Firmicutes	Erysipelotrichia	Erysipelotrichales	Erysipelotrichaceae	Turicibacter	Turicibacter_sp_LA61
Otu000529	1	0	0	0	0	0	1	0	0	0	0	0	0	0	0.001972	0	0	Bacteria	Bacteroidetes	Bacteroidia	Bacteroidales	Muribaculaceae
Otu000535	1	0	0	0	0	1	0	0	0	0	0	0	0	0.001543	0	0	0	Bacteria	Firmicutes	Clostridia	Clostridiales	Lachnospiraceae	Lachnospiraceae_NK4A136_group
Otu000537	1	0	0	1	0	0	0	0	0	0	0	0.001765	0	0	0	0	0	Bacteria	Planctomycetes	Phycisphaerae	Tepidisphaerales	WD2101_soil_group
Otu000550	1	0	0	0	0	0	1	0	0	0	0	0	0	0	0.001972	0	0	Bacteria	Bacteroidetes	Bacteroidia	Bacteroidales	Muribaculaceae
Otu000554	1	0	0	0	0	0	0	1	0	0	0	0	0	0	0	0.001837	0	Bacteria	Proteobacteria	Alphaproteobacteria	Elsterales
Otu000557	1	1	0	0	0	0	0	0	0	0.001792	0	0	0	0	0	0	0	Bacteria	Firmicutes	Clostridia	Clostridiales	Lachnospiraceae
Otu000563	1	0	0	1	0	0	0	0	0	0	0	0.001765	0	0	0	0	0	Bacteria	Proteobacteria	Gammaproteobacteria	Betaproteobacteriales	Burkholderiaceae	Burkholderia-Caballeronia-Paraburkholderia
Otu000572	1	1	0	0	0	0	0	0	0	0.001792	0	0	0	0	0	0	0	Bacteria	Bacteroidetes	Bacteroidia	Bacteroidales	Muribaculaceae
Otu000577	1	0	1	0	0	0	0	0	0	0	0.001426	0	0	0	0	0	0	Bacteria	Firmicutes	Clostridia	Clostridiales	Ruminococcaceae	Ruminococcaceae_UCG-013
Otu000581	1	0	0	0	0	0	0	0	1	0	0	0	0	0	0	0	0.001896	Bacteria	Bacteroidetes	Bacteroidia	Bacteroidales	Muribaculaceae
Otu000582	1	0	1	0	0	0	0	0	0	0	0.001426	0	0	0	0	0	0	Bacteria	Bacteroidetes	Bacteroidia	Bacteroidales	Muribaculaceae
Otu000584	1	0	0	1	0	0	0	0	0	0	0	0.001765	0	0	0	0	0	Bacteria	Bacteroidetes	Bacteroidia	Bacteroidales	Muribaculaceae
Otu000600	1	0	0	0	0	1	0	0	0	0	0	0	0	0.001543	0	0	0	Bacteria	Firmicutes	Clostridia	Clostridiales	Lachnospiraceae	Lachnospiraceae_NK4A136_group
Otu000601	1	0	0	0	0	0	0	0	1	0	0	0	0	0	0	0	0.001896	Bacteria	Firmicutes	Clostridia	Clostridiales	Ruminococcaceae	Eubacterium_coprostanoligenes_group
Otu000608	1	0	1	0	0	0	0	0	0	0	0.001426	0	0	0	0	0	0	Bacteria	Bacteroidetes	Bacteroidia	Bacteroidales	Muribaculaceae
Otu000609	1	0	1	0	0	0	0	0	0	0	0.001426	0	0	0	0	0	0	Bacteria	Firmicutes	Clostridia	Clostridiales	Lachnospiraceae	Lachnospiraceae_NK4A136_group
Otu000619	1	0	0	0	0	1	0	0	0	0	0	0	0	0.001543	0	0	0	Bacteria	Bacteroidetes	Bacteroidia	Bacteroidales	Muribaculaceae
Otu000620	1	0	0	0	1	0	0	0	0	0	0	0	0.001626	0	0	0	0	Bacteria	Firmicutes	Erysipelotrichia	Erysipelotrichales	Erysipelotrichaceae	Dubosiella
Otu000625	1	0	0	0	0	0	0	0	1	0	0	0	0	0	0	0	0.001896	Bacteria	Firmicutes	Clostridia	Clostridiales	Clostridiales_vadinBB60_group
Otu000631	1	1	0	0	0	0	0	0	0	0.001792	0	0	0	0	0	0	0	Bacteria	Cyanobacteria	Oxyphotobacteria	Chloroplast
Otu000632	1	0	1	0	0	0	0	0	0	0	0.001426	0	0	0	0	0	0	Bacteria
Otu000643	1	0	0	0	0	0	0	1	0	0	0	0	0	0	0	0.001837	0	Bacteria	Patescibacteria	Saccharimonadia	Saccharimonadales	Saccharimonadaceae
Otu000649	1	0	0	0	1	0	0	0	0	0	0	0	0.001626	0	0	0	0	Bacteria	Proteobacteria	Deltaproteobacteria	Desulfarculales	Desulfarculaceae
Otu000663	1	0	0	0	0	0	1	0	0	0	0	0	0	0	0.001972	0	0	Bacteria	Bacteroidetes	Bacteroidia	Bacteroidales	Muribaculaceae
Otu000675	1	0	1	0	0	0	0	0	0	0	0.001426	0	0	0	0	0	0	Bacteria	Bacteroidetes	Bacteroidia	Bacteroidales	Muribaculaceae
Otu000678	1	0	0	0	0	0	0	1	0	0	0	0	0	0	0	0.001837	0	Bacteria	Proteobacteria	Gammaproteobacteria	Gammaproteobacteria_Incertae_Sedis	Unknown_Family	Acidibacter
Otu000687	1	0	1	0	0	0	0	0	0	0	0.001426	0	0	0	0	0	0	Bacteria	Bacteroidetes	Bacteroidia	Bacteroidales	Muribaculaceae
Otu000692	1	0	1	0	0	0	0	0	0	0	0.001426	0	0	0	0	0	0	Bacteria	Bacteroidetes	Bacteroidia	Bacteroidales	Muribaculaceae
Otu000699	1	0	0	0	0	1	0	0	0	0	0	0	0	0.001543	0	0	0	Bacteria	Bacteroidetes	Bacteroidia	Bacteroidales	Muribaculaceae
Otu000732	1	0	1	0	0	0	0	0	0	0	0.001426	0	0	0	0	0	0	Bacteria	Proteobacteria	Gammaproteobacteria	Vibrionales	Vibrionaceae	Enterovibrio
Otu000740	1	0	0	0	0	0	0	0	1	0	0	0	0	0	0	0	0.001896	Bacteria	Firmicutes	Clostridia	Clostridiales	Lachnospiraceae	GCA-900066575
Otu000741	1	1	0	0	0	0	0	0	0	0.001792	0	0	0	0	0	0	0	Bacteria	Planctomycetes	Planctomycetacia	Isosphaerales	Isosphaeraceae
Otu000744	1	0	0	1	0	0	0	0	0	0	0	0.001765	0	0	0	0	0	Bacteria	Proteobacteria	Alphaproteobacteria	Acetobacterales	Acetobacteraceae	Acidicaldus
Otu000750	1	1	0	0	0	0	0	0	0	0.001792	0	0	0	0	0	0	0	Bacteria	Actinobacteria	Acidimicrobiia	IMCC26256
Otu000758	1	0	0	0	1	0	0	0	0	0	0	0	0.001626	0	0	0	0	Bacteria	Bacteroidetes	Bacteroidia	Bacteroidales	Muribaculaceae
Otu000761	1	0	0	0	0	0	1	0	0	0	0	0	0	0	0.001972	0	0	Bacteria	Bacteroidetes	Bacteroidia	Bacteroidales	Muribaculaceae
Otu000774	1	0	0	1	0	0	0	0	0	0	0	0.001765	0	0	0	0	0	Bacteria	Firmicutes	Clostridia	Clostridiales	Ruminococcaceae	Ruminococcaceae_UCG-014
Otu000781	1	0	0	0	0	0	0	1	0	0	0	0	0	0	0	0.001837	0	Bacteria	Actinobacteria	Actinobacteria	Frankiales	Acidothermaceae	Acidothermus
Otu000783	1	0	0	0	0	0	1	0	0	0	0	0	0	0	0.001972	0	0	Bacteria	Firmicutes	Bacilli	Lactobacillales	Lactobacillaceae	Lactobacillus
Otu000796	1	0	0	0	0	0	0	1	0	0	0	0	0	0	0	0.001837	0	Bacteria	Firmicutes	Clostridia	Clostridiales	Lachnospiraceae
Otu000804	1	0	0	0	0	0	0	1	0	0	0	0	0	0	0	0.001837	0	Bacteria	Bacteroidetes	Bacteroidia	Bacteroidales	Muribaculaceae
Otu000807	1	0	0	0	0	0	0	0	1	0	0	0	0	0	0	0	0.001896	Bacteria	Bacteroidetes	Bacteroidia	Bacteroidales	Muribaculaceae
Otu000814	1	0	0	0	0	0	0	1	0	0	0	0	0	0	0	0.001837	0	Bacteria	Firmicutes	Clostridia	Clostridiales	Lachnospiraceae
Otu000820	1	0	0	0	0	0	0	1	0	0	0	0	0	0	0	0.001837	0	Bacteria	Actinobacteria	Actinobacteria
Otu000823	1	0	0	0	0	0	0	1	0	0	0	0	0	0	0	0.001837	0	Bacteria	Actinobacteria	Acidimicrobiia	Microtrichales
Otu000827	1	0	0	0	0	0	0	0	1	0	0	0	0	0	0	0	0.001896	Bacteria	Firmicutes	Clostridia	Clostridiales	Lachnospiraceae
Otu000845	1	0	0	0	0	0	0	1	0	0	0	0	0	0	0	0.001837	0	Bacteria	Acidobacteria	Acidobacteriia	Subgroup_2
Otu000857	1	0	0	0	0	0	1	0	0	0	0	0	0	0	0.001972	0	0	Bacteria	Tenericutes	Mollicutes	Anaeroplasmatales	Anaeroplasmataceae	Anaeroplasma
Otu000860	1	0	0	0	0	0	0	0	1	0	0	0	0	0	0	0	0.001896	Bacteria	Bacteroidetes	Bacteroidia	Bacteroidales	Muribaculaceae
Otu000871	1	0	0	0	1	0	0	0	0	0	0	0	0.001626	0	0	0	0	Bacteria	Bacteroidetes	Bacteroidia	Bacteroidales	Muribaculaceae
Otu000872	1	0	0	0	1	0	0	0	0	0	0	0	0.001626	0	0	0	0	Bacteria	Firmicutes	Erysipelotrichia	Erysipelotrichales	Erysipelotrichaceae	Dubosiella
Otu000895	1	0	1	0	0	0	0	0	0	0	0.001426	0	0	0	0	0	0	Bacteria	Firmicutes	Clostridia	Clostridiales	Lachnospiraceae
Otu000927	1	0	1	0	0	0	0	0	0	0	0.001426	0	0	0	0	0	0	Bacteria	Bacteroidetes	Bacteroidia	Bacteroidales	Muribaculaceae
Otu000933	1	0	0	0	1	0	0	0	0	0	0	0	0.001626	0	0	0	0	Bacteria	Bacteroidetes	Bacteroidia	Bacteroidales	Muribaculaceae
Otu000945	1	0	0	0	0	0	0	1	0	0	0	0	0	0	0	0.001837	0	Bacteria
Otu000954	1	0	1	0	0	0	0	0	0	0	0.001426	0	0	0	0	0	0	Bacteria	Bacteroidetes	Bacteroidia	Bacteroidales	Muribaculaceae
Otu000955	1	0	0	0	0	0	0	1	0	0	0	0	0	0	0	0.001837	0	Bacteria	Acidobacteria	Acidobacteriia	Solibacterales	Solibacteraceae_Subgroup_3	Candidatus_Solibacter
Otu000957	1	0	0	0	0	1	0	0	0	0	0	0	0	0.001543	0	0	0	Bacteria	Bacteroidetes	Bacteroidia	Bacteroidales	Muribaculaceae
Otu000973	1	0	1	0	0	0	0	0	0	0	0.001426	0	0	0	0	0	0	Bacteria	Actinobacteria	Actinobacteria
Otu000978	1	0	0	0	0	0	0	1	0	0	0	0	0	0	0	0.001837	0	Bacteria	Firmicutes	Clostridia	Clostridiales	Lachnospiraceae
Otu001011	1	0	0	0	1	0	0	0	0	0	0	0	0.001626	0	0	0	0	Bacteria	Chloroflexi	AD3
Otu001027	1	0	0	0	0	0	1	0	0	0	0	0	0	0	0.001972	0	0	Bacteria	Bacteroidetes	Bacteroidia	Bacteroidales	Muribaculaceae
Otu001035	1	0	0	0	0	0	0	0	1	0	0	0	0	0	0	0	0.001896	Bacteria	Bacteroidetes	Bacteroidia	Bacteroidales
Otu001038	1	0	1	0	0	0	0	0	0	0	0.001426	0	0	0	0	0	0	Bacteria	Actinobacteria	Actinobacteria	Frankiales	Frankiaceae	Jatrophihabitans
Otu001042	1	0	0	0	0	0	0	1	0	0	0	0	0	0	0	0.001837	0	Bacteria	Acidobacteria	Acidobacteriia	Solibacterales	Solibacteraceae_Subgroup_3	Bryobacter
Otu001043	1	0	0	1	0	0	0	0	0	0	0	0.001765	0	0	0	0	0	Bacteria	Bacteroidetes	Bacteroidia	Bacteroidales
Otu001047	1	0	0	0	0	0	0	1	0	0	0	0	0	0	0	0.001837	0	Bacteria	Bacteroidetes	Bacteroidia	Bacteroidales	Muribaculaceae
Otu001048	1	0	0	1	0	0	0	0	0	0	0	0.001765	0	0	0	0	0	Bacteria	Bacteroidetes	Bacteroidia	Bacteroidales
Otu001060	1	0	0	1	0	0	0	0	0	0	0	0.001765	0	0	0	0	0	Bacteria
Otu001065	1	0	0	0	0	0	0	1	0	0	0	0	0	0	0	0.001837	0	Bacteria	Chloroflexi	Ktedonobacteria	Ktedonobacterales	JG30-KF-AS9	Chloroflexi_bacterium_Ellin7237
Otu001069	1	0	0	0	0	0	0	1	0	0	0	0	0	0	0	0.001837	0	Bacteria	Actinobacteria
Otu001084	1	1	0	0	0	0	0	0	0	0.001792	0	0	0	0	0	0	0	Bacteria	Firmicutes	Bacilli	Lactobacillales	Lactobacillaceae	Lactobacillus	Lactobacillus_delbrueckii
Otu001091	1	0	0	0	0	0	1	0	0	0	0	0	0	0	0.001972	0	0	Bacteria	Firmicutes	Clostridia	Clostridiales	Lachnospiraceae
Otu001098	1	1	0	0	0	0	0	0	0	0.001792	0	0	0	0	0	0	0	Bacteria	Bacteroidetes	Bacteroidia	Bacteroidales	Muribaculaceae
Otu001103	1	0	0	0	1	0	0	0	0	0	0	0	0.001626	0	0	0	0	Bacteria	Bacteroidetes	Bacteroidia	Bacteroidales	Muribaculaceae
Otu001107	1	0	0	0	1	0	0	0	0	0	0	0	0.001626	0	0	0	0	Bacteria	Firmicutes	Erysipelotrichia	Erysipelotrichales	Erysipelotrichaceae	Dubosiella
Otu001108	1	0	0	0	0	0	0	1	0	0	0	0	0	0	0	0.001837	0	Bacteria	Bacteroidetes	Bacteroidia	Bacteroidales	Muribaculaceae
Otu001110	1	0	0	0	0	0	1	0	0	0	0	0	0	0	0.001972	0	0	Bacteria	Bacteroidetes	Bacteroidia	Bacteroidales	Muribaculaceae
Otu001130	1	0	0	0	1	0	0	0	0	0	0	0	0.001626	0	0	0	0	Bacteria	Firmicutes	Erysipelotrichia	Erysipelotrichales	Erysipelotrichaceae	Dubosiella
Otu001134	1	0	1	0	0	0	0	0	0	0	0.001426	0	0	0	0	0	0	Bacteria	Proteobacteria	Gammaproteobacteria	Betaproteobacteriales	Burkholderiaceae	Comamonas	Comamonas_aquatica
Otu001137	1	0	0	0	0	0	0	1	0	0	0	0	0	0	0	0.001837	0	Bacteria	Chloroflexi	Ktedonobacteria	Ktedonobacterales	JG30-KF-AS9
Otu001139	1	0	0	0	0	0	0	1	0	0	0	0	0	0	0	0.001837	0	Bacteria	Verrucomicrobia	Verrucomicrobiae	Chthoniobacterales	Chthoniobacteraceae	Candidatus_Udaeobacter
Otu001142	1	0	0	0	0	0	0	1	0	0	0	0	0	0	0	0.001837	0	Bacteria	Proteobacteria	Alphaproteobacteria	Rhizobiales	Xanthobacteraceae
Otu001147	1	0	0	0	1	0	0	0	0	0	0	0	0.001626	0	0	0	0	Bacteria	Bacteroidetes	Bacteroidia	Bacteroidales	Muribaculaceae
Otu001151	1	0	1	0	0	0	0	0	0	0	0.001426	0	0	0	0	0	0	Bacteria	Firmicutes	Clostridia	Clostridiales	Clostridiales_vadinBB60_group
Otu001160	1	0	0	0	0	0	0	0	1	0	0	0	0	0	0	0	0.001896	Bacteria	Bacteroidetes	Bacteroidia	Bacteroidales	Muribaculaceae
Otu001161	1	0	0	1	0	0	0	0	0	0	0	0.001765	0	0	0	0	0	Bacteria
Otu001164	1	0	1	0	0	0	0	0	0	0	0.001426	0	0	0	0	0	0	Bacteria	Proteobacteria	Gammaproteobacteria	Gammaproteobacteria_Incertae_Sedis	Unknown_Family	Acidibacter
Otu001168	1	0	0	1	0	0	0	0	0	0	0	0.001765	0	0	0	0	0	Bacteria	Firmicutes	Erysipelotrichia	Erysipelotrichales	Erysipelotrichaceae	Dubosiella
Otu001178	1	0	0	0	1	0	0	0	0	0	0	0	0.001626	0	0	0	0	Bacteria	Bacteroidetes	Bacteroidia	Bacteroidales	Muribaculaceae
Otu001180	1	0	1	0	0	0	0	0	0	0	0.001426	0	0	0	0	0	0	Bacteria	Bacteroidetes	Bacteroidia	Bacteroidales	Muribaculaceae
Otu001187	1	0	0	0	0	0	0	0	1	0	0	0	0	0	0	0	0.001896	Bacteria	Bacteroidetes	Bacteroidia	Bacteroidales
Otu001188	1	0	0	0	1	0	0	0	0	0	0	0	0.001626	0	0	0	0	Bacteria	Firmicutes	Clostridia	Clostridiales	Ruminococcaceae	Ruminococcaceae_UCG-014
Otu001216	1	0	0	1	0	0	0	0	0	0	0	0.001765	0	0	0	0	0	Bacteria	Firmicutes	Clostridia	Clostridiales	Lachnospiraceae
Otu001230	1	0	1	0	0	0	0	0	0	0	0.001426	0	0	0	0	0	0	Bacteria	Verrucomicrobia	Verrucomicrobiae	Verrucomicrobiales	Akkermansiaceae	Akkermansia	Akkermansia_muciniphila
Otu001233	1	0	0	0	0	0	0	1	0	0	0	0	0	0	0	0.001837	0	Bacteria	Firmicutes	Bacilli	Bacillales	Alicyclobacillaceae	Tumebacillus
Otu001262	1	0	0	0	1	0	0	0	0	0	0	0	0.001626	0	0	0	0	Bacteria	Actinobacteria	Actinobacteria
Otu001263	1	0	0	0	1	0	0	0	0	0	0	0	0.001626	0	0	0	0	Bacteria	Bacteroidetes	Bacteroidia	Bacteroidales	Muribaculaceae
Otu001274	1	0	0	0	0	1	0	0	0	0	0	0	0	0.001543	0	0	0	Bacteria	Firmicutes	Clostridia	Clostridiales	Lachnospiraceae	GCA-900066575
Otu001283	1	0	0	0	1	0	0	0	0	0	0	0	0.001626	0	0	0	0	Bacteria	Firmicutes	Erysipelotrichia	Erysipelotrichales	Erysipelotrichaceae	Dubosiella
Otu001290	1	0	1	0	0	0	0	0	0	0	0.001426	0	0	0	0	0	0	Bacteria	Bacteroidetes	Bacteroidia	Bacteroidales	Muribaculaceae
Otu001292	1	0	1	0	0	0	0	0	0	0	0.001426	0	0	0	0	0	0	Bacteria	Firmicutes	Clostridia	Clostridiales	Clostridiales_vadinBB60_group
Otu001295	1	0	0	0	0	1	0	0	0	0	0	0	0	0.001543	0	0	0	Bacteria	Bacteroidetes	Bacteroidia	Bacteroidales	Muribaculaceae
Otu001310	1	0	1	0	0	0	0	0	0	0	0.001426	0	0	0	0	0	0	Bacteria	Verrucomicrobia	Verrucomicrobiae	Verrucomicrobiales	Akkermansiaceae	Akkermansia	Akkermansia_muciniphila
Otu001325	1	0	0	0	0	1	0	0	0	0	0	0	0	0.001543	0	0	0	Bacteria	Bacteroidetes	Bacteroidia	Bacteroidales	Muribaculaceae	Muribaculum	Parabacteroides_sp_YL27
Otu001337	1	0	0	0	0	0	0	1	0	0	0	0	0	0	0	0.001837	0	Bacteria	Proteobacteria	Alphaproteobacteria	Rhodobacterales	Rhodobacteraceae
Otu001344	1	0	1	0	0	0	0	0	0	0	0.001426	0	0	0	0	0	0	Bacteria	Firmicutes	Clostridia	Clostridiales	Ruminococcaceae	GCA-900066225
Otu001346	1	0	0	0	1	0	0	0	0	0	0	0	0.001626	0	0	0	0	Bacteria	Firmicutes	Clostridia	Clostridiales
Otu001347	1	0	0	0	1	0	0	0	0	0	0	0	0.001626	0	0	0	0	Bacteria	Firmicutes	Clostridia	Clostridiales	Lachnospiraceae
Otu001359	1	0	0	0	0	1	0	0	0	0	0	0	0	0.001543	0	0	0	Bacteria	Bacteroidetes	Bacteroidia	Bacteroidales	Muribaculaceae
Otu001391	1	0	0	0	1	0	0	0	0	0	0	0	0.001626	0	0	0	0	Bacteria	Actinobacteria	Actinobacteria
Otu001394	1	0	0	0	1	0	0	0	0	0	0	0	0.001626	0	0	0	0	Bacteria	Firmicutes	Negativicutes	Selenomonadales	Veillonellaceae	Megamonas
Otu001400	1	0	0	0	1	0	0	0	0	0	0	0	0.001626	0	0	0	0	Bacteria	Firmicutes	Erysipelotrichia	Erysipelotrichales	Erysipelotrichaceae	Dubosiella
Otu001410	1	0	0	0	0	0	1	0	0	0	0	0	0	0	0.001972	0	0	Bacteria	Bacteroidetes	Bacteroidia	Bacteroidales	Muribaculaceae
Otu001413	1	0	1	0	0	0	0	0	0	0	0.001426	0	0	0	0	0	0	Bacteria	Verrucomicrobia	Verrucomicrobiae	Pedosphaerales	Pedosphaeraceae
Otu001415	1	0	0	0	0	1	0	0	0	0	0	0	0	0.001543	0	0	0	Bacteria	Bacteroidetes	Bacteroidia	Bacteroidales	Muribaculaceae
Otu001418	1	0	1	0	0	0	0	0	0	0	0.001426	0	0	0	0	0	0	Bacteria	Verrucomicrobia	Verrucomicrobiae	Verrucomicrobiales	Akkermansiaceae	Akkermansia	Akkermansia_muciniphila
Otu001420	1	0	1	0	0	0	0	0	0	0	0.001426	0	0	0	0	0	0	Bacteria	Bacteroidetes	Bacteroidia	Bacteroidales	Muribaculaceae
Otu001421	1	0	1	0	0	0	0	0	0	0	0.001426	0	0	0	0	0	0	Bacteria	Bacteroidetes	Bacteroidia	Bacteroidales
Otu001447	1	0	0	0	0	1	0	0	0	0	0	0	0	0.001543	0	0	0	Bacteria	Firmicutes	Clostridia	Clostridiales
Otu001451	1	0	0	1	0	0	0	0	0	0	0	0.001765	0	0	0	0	0	Bacteria	Firmicutes	Erysipelotrichia	Erysipelotrichales	Erysipelotrichaceae	Turicibacter	Turicibacter_sp_LA61
Otu001454	1	0	1	0	0	0	0	0	0	0	0.001426	0	0	0	0	0	0	Bacteria	Firmicutes	Clostridia	Clostridiales	Ruminococcaceae
Otu001465	1	0	0	0	0	0	0	1	0	0	0	0	0	0	0	0.001837	0	Bacteria	Firmicutes	Bacilli	Bacillales	Paenibacillaceae	Cohnella
Otu001481	1	0	0	0	1	0	0	0	0	0	0	0	0.001626	0	0	0	0	Bacteria	Bacteroidetes	Bacteroidia	Bacteroidales	Muribaculaceae
Otu001486	1	0	0	0	0	1	0	0	0	0	0	0	0	0.001543	0	0	0	Bacteria	Firmicutes	Clostridia	Clostridiales	Lachnospiraceae
Otu001499	1	0	0	0	0	0	0	1	0	0	0	0	0	0	0	0.001837	0	Bacteria	Bacteroidetes	Bacteroidia	Bacteroidales	Muribaculaceae
Otu001504	1	1	0	0	0	0	0	0	0	0.001792	0	0	0	0	0	0	0	Bacteria	Acidobacteria	Acidobacteriia	Solibacterales	Solibacteraceae_Subgroup_3	Candidatus_Solibacter
Otu001505	1	0	0	0	0	0	0	0	1	0	0	0	0	0	0	0	0.001896	Bacteria	Proteobacteria	Alphaproteobacteria	Rhizobiales	Methyloligellaceae
Otu001515	1	0	1	0	0	0	0	0	0	0	0.001426	0	0	0	0	0	0	Bacteria	Bacteroidetes	Bacteroidia	Bacteroidales
Otu001521	1	0	0	0	0	0	0	0	1	0	0	0	0	0	0	0	0.001896	Bacteria	Bacteroidetes	Bacteroidia	Bacteroidales	Muribaculaceae
Otu001525	1	0	0	0	0	0	1	0	0	0	0	0	0	0	0.001972	0	0	Bacteria	Firmicutes	Clostridia	Clostridiales	Lachnospiraceae
Otu001532	1	0	1	0	0	0	0	0	0	0	0.001426	0	0	0	0	0	0	Bacteria	Bacteroidetes	Bacteroidia	Bacteroidales
Otu001560	1	0	0	0	0	0	0	0	1	0	0	0	0	0	0	0	0.001896	Bacteria	Chloroflexi	Ktedonobacteria	Ktedonobacterales	JG30-KF-AS9
Otu001575	1	0	0	0	1	0	0	0	0	0	0	0	0.001626	0	0	0	0	Bacteria	Firmicutes	Erysipelotrichia	Erysipelotrichales	Erysipelotrichaceae	Dubosiella
Otu001576	1	0	1	0	0	0	0	0	0	0	0.001426	0	0	0	0	0	0	Bacteria	Bacteroidetes	Bacteroidia	Bacteroidales
Otu001583	1	0	0	0	0	0	0	1	0	0	0	0	0	0	0	0.001837	0	Bacteria	Firmicutes	Bacilli	Lactobacillales	Leuconostocaceae	Weissella	Weissella_paramesenteroides
Otu001585	1	0	0	0	1	0	0	0	0	0	0	0	0.001626	0	0	0	0	Bacteria	Proteobacteria	Gammaproteobacteria	Betaproteobacteriales	Burkholderiaceae	Pelomonas
Otu001590	1	0	1	0	0	0	0	0	0	0	0.001426	0	0	0	0	0	0	Bacteria	Bacteroidetes	Bacteroidia	Bacteroidales	Muribaculaceae
Otu001598	1	1	0	0	0	0	0	0	0	0.001792	0	0	0	0	0	0	0	Bacteria	Firmicutes	Erysipelotrichia	Erysipelotrichales	Erysipelotrichaceae	Dubosiella
Otu001600	1	0	0	1	0	0	0	0	0	0	0	0.001765	0	0	0	0	0	Bacteria
Otu001609	1	0	0	0	0	0	0	0	1	0	0	0	0	0	0	0	0.001896	Bacteria	Bacteroidetes	Bacteroidia	Bacteroidales
Otu001612	1	0	0	0	0	0	0	0	1	0	0	0	0	0	0	0	0.001896	Bacteria	Bacteroidetes	Bacteroidia	Bacteroidales	Muribaculaceae
Otu001621	1	0	0	1	0	0	0	0	0	0	0	0.001765	0	0	0	0	0	Bacteria	Bacteroidetes	Bacteroidia	Bacteroidales	Muribaculaceae
Otu001628	1	0	0	0	1	0	0	0	0	0	0	0	0.001626	0	0	0	0	Bacteria	Bacteroidetes	Bacteroidia	Bacteroidales	Muribaculaceae
Otu001644	1	0	0	0	1	0	0	0	0	0	0	0	0.001626	0	0	0	0	Bacteria	Actinobacteria	Coriobacteriia	Coriobacteriales	Atopobiaceae
Otu001646	1	0	0	0	0	1	0	0	0	0	0	0	0	0.001543	0	0	0	Bacteria	Bacteroidetes	Bacteroidia	Bacteroidales	Muribaculaceae
Otu001652	1	0	0	0	1	0	0	0	0	0	0	0	0.001626	0	0	0	0	Bacteria	Firmicutes	Erysipelotrichia	Erysipelotrichales	Erysipelotrichaceae	Dubosiella
Otu001654	1	0	0	0	1	0	0	0	0	0	0	0	0.001626	0	0	0	0	Bacteria	Bacteroidetes	Bacteroidia	Bacteroidales	Muribaculaceae
Otu001663	1	0	0	0	1	0	0	0	0	0	0	0	0.001626	0	0	0	0	Bacteria	Firmicutes	Erysipelotrichia	Erysipelotrichales	Erysipelotrichaceae	Dubosiella
Otu001677	1	0	1	0	0	0	0	0	0	0	0.001426	0	0	0	0	0	0	Bacteria	Firmicutes	Clostridia	Clostridiales	Ruminococcaceae	Ruminiclostridium_9
Otu001711	1	0	0	0	0	0	0	0	1	0	0	0	0	0	0	0	0.001896	Bacteria	Bacteroidetes	Bacteroidia	Bacteroidales	Muribaculaceae
Otu001718	1	0	0	0	0	0	0	0	1	0	0	0	0	0	0	0	0.001896	Bacteria	Bacteroidetes	Bacteroidia	Bacteroidales	Muribaculaceae
Otu001725	1	0	1	0	0	0	0	0	0	0	0.001426	0	0	0	0	0	0	Bacteria	Proteobacteria	Alphaproteobacteria	Rhizobiales	Xanthobacteraceae
Otu001730	1	0	0	0	0	0	0	1	0	0	0	0	0	0	0	0.001837	0	Bacteria	Bacteroidetes	Bacteroidia	Bacteroidales	Muribaculaceae
Otu001732	1	0	0	0	1	0	0	0	0	0	0	0	0.001626	0	0	0	0	Bacteria	Firmicutes	Bacilli	Bacillales	Bacillaceae	Bacillus
Otu001741	1	0	0	0	0	0	0	0	1	0	0	0	0	0	0	0	0.001896	Bacteria	Bacteroidetes	Bacteroidia	Bacteroidales	Muribaculaceae
Otu001743	1	0	0	0	0	0	0	1	0	0	0	0	0	0	0	0.001837	0	Bacteria	Proteobacteria	Alphaproteobacteria	Rhizobiales	Rhizobiaceae
Otu001745	1	0	0	0	0	0	1	0	0	0	0	0	0	0	0.001972	0	0	Bacteria	Planctomycetes	OM190
Otu001747	1	0	0	0	1	0	0	0	0	0	0	0	0.001626	0	0	0	0	Bacteria	Bacteroidetes	Bacteroidia	Bacteroidales	Muribaculaceae
Otu001748	1	0	1	0	0	0	0	0	0	0	0.001426	0	0	0	0	0	0	Bacteria	Firmicutes	Clostridia	Clostridiales	Ruminococcaceae	Ruminiclostridium_9
Otu001759	1	0	1	0	0	0	0	0	0	0	0.001426	0	0	0	0	0	0	Bacteria	Proteobacteria	Gammaproteobacteria	Betaproteobacteriales	Burkholderiaceae	Massilia
Otu001779	1	0	1	0	0	0	0	0	0	0	0.001426	0	0	0	0	0	0	Bacteria	Firmicutes	Clostridia	Clostridiales	Ruminococcaceae
Otu001821	1	0	0	0	0	1	0	0	0	0	0	0	0	0.001543	0	0	0	Bacteria	Bacteroidetes	Bacteroidia	Bacteroidales
Otu001823	1	0	0	0	0	0	0	0	1	0	0	0	0	0	0	0	0.001896	Bacteria	Bacteroidetes	Bacteroidia	Bacteroidales	Bacteroidaceae	Bacteroides	Bacteroides_acidifaciens
Otu001825	1	0	0	0	0	0	1	0	0	0	0	0	0	0	0.001972	0	0	Bacteria	Firmicutes	Clostridia	Clostridiales	Ruminococcaceae	Butyricicoccus
Otu001852	1	0	1	0	0	0	0	0	0	0	0.001426	0	0	0	0	0	0	Bacteria	Verrucomicrobia	Verrucomicrobiae	Verrucomicrobiales	Akkermansiaceae	Akkermansia	Akkermansia_muciniphila
Otu001853	1	0	0	0	0	0	0	0	1	0	0	0	0	0	0	0	0.001896	Bacteria	Bacteroidetes	Bacteroidia	Bacteroidales
Otu001854	1	0	1	0	0	0	0	0	0	0	0.001426	0	0	0	0	0	0	Bacteria	Bacteroidetes	Bacteroidia	Bacteroidales	Muribaculaceae
Otu001889	1	0	0	0	0	1	0	0	0	0	0	0	0	0.001543	0	0	0	Bacteria	Proteobacteria	Alphaproteobacteria
Otu001905	1	0	0	0	1	0	0	0	0	0	0	0	0.001626	0	0	0	0	Bacteria	Bacteroidetes	Bacteroidia	Bacteroidales	Muribaculaceae
Otu001908	1	0	0	0	1	0	0	0	0	0	0	0	0.001626	0	0	0	0	Bacteria	Bacteroidetes	Bacteroidia	Bacteroidales	Muribaculaceae
Otu001909	1	0	0	0	0	1	0	0	0	0	0	0	0	0.001543	0	0	0	Bacteria	Bacteroidetes	Bacteroidia	Bacteroidales	Muribaculaceae
Otu001919	1	0	0	0	0	0	0	1	0	0	0	0	0	0	0	0.001837	0	Bacteria	Bacteroidetes	Bacteroidia	Bacteroidales	Muribaculaceae
Otu001928	1	0	0	0	1	0	0	0	0	0	0	0	0.001626	0	0	0	0	Bacteria	Firmicutes	Clostridia	Clostridiales
Otu001935	1	0	0	0	0	0	0	0	1	0	0	0	0	0	0	0	0.001896	Bacteria	Bacteroidetes	Bacteroidia	Bacteroidales
Otu001949	1	0	1	0	0	0	0	0	0	0	0.001426	0	0	0	0	0	0	Bacteria	Bacteroidetes	Bacteroidia	Bacteroidales	Muribaculaceae
Otu001955	1	0	0	0	0	0	1	0	0	0	0	0	0	0	0.001972	0	0	Bacteria	Firmicutes	Clostridia	Clostridiales	Lachnospiraceae
Otu001956	1	0	0	0	0	0	0	0	1	0	0	0	0	0	0	0	0.001896	Bacteria	Firmicutes	Clostridia	Clostridiales	Lachnospiraceae	Lachnospiraceae_NK4A136_group	Lachnospiraceae_bacterium_A4
Otu001959	1	0	0	0	0	0	1	0	0	0	0	0	0	0	0.001972	0	0	Bacteria	Firmicutes	Clostridia	Clostridiales	Ruminococcaceae	Ruminococcaceae_UCG-014
Otu001979	1	0	0	0	0	1	0	0	0	0	0	0	0	0.001543	0	0	0	Bacteria	Bacteroidetes	Bacteroidia	Bacteroidales	Muribaculaceae
Otu001988	1	0	0	0	0	0	0	0	1	0	0	0	0	0	0	0	0.001896	Bacteria	Bacteroidetes	Bacteroidia	Bacteroidales	Bacteroidaceae	Bacteroides
Otu001990	1	0	0	0	1	0	0	0	0	0	0	0	0.001626	0	0	0	0	Bacteria	Bacteroidetes	Bacteroidia	Bacteroidales	Muribaculaceae
Otu001994	1	0	0	0	0	1	0	0	0	0	0	0	0	0.001543	0	0	0	Bacteria	Bacteroidetes	Bacteroidia	Bacteroidales	Prevotellaceae
Otu001997	1	0	1	0	0	0	0	0	0	0	0.001426	0	0	0	0	0	0	Bacteria	Bacteroidetes	Bacteroidia	Bacteroidales	Muribaculaceae
Otu002004	1	0	0	1	0	0	0	0	0	0	0	0.001765	0	0	0	0	0	Bacteria	Firmicutes	Erysipelotrichia	Erysipelotrichales	Erysipelotrichaceae	Dubosiella
Otu002008	1	0	0	0	1	0	0	0	0	0	0	0	0.001626	0	0	0	0	Bacteria	Bacteroidetes	Bacteroidia	Bacteroidales	Muribaculaceae
Otu002023	1	0	1	0	0	0	0	0	0	0	0.001426	0	0	0	0	0	0	Bacteria	Verrucomicrobia	Verrucomicrobiae	Verrucomicrobiales	Akkermansiaceae	Akkermansia
Otu002025	1	0	0	0	1	0	0	0	0	0	0	0	0.001626	0	0	0	0	Bacteria	Bacteroidetes	Bacteroidia	Bacteroidales	Muribaculaceae	Muribaculum
Otu002030	1	0	0	0	1	0	0	0	0	0	0	0	0.001626	0	0	0	0	Bacteria	Firmicutes	Erysipelotrichia	Erysipelotrichales	Erysipelotrichaceae	Dubosiella
Otu002031	1	0	0	0	1	0	0	0	0	0	0	0	0.001626	0	0	0	0	Bacteria	Firmicutes	Erysipelotrichia	Erysipelotrichales	Erysipelotrichaceae	Dubosiella
Otu002051	1	0	1	0	0	0	0	0	0	0	0.001426	0	0	0	0	0	0	Bacteria	Bacteroidetes	Bacteroidia	Bacteroidales	Muribaculaceae
Otu002059	1	0	0	0	1	0	0	0	0	0	0	0	0.001626	0	0	0	0	Bacteria	Firmicutes	Erysipelotrichia	Erysipelotrichales	Erysipelotrichaceae	Faecalibaculum
Otu002060	1	0	0	0	1	0	0	0	0	0	0	0	0.001626	0	0	0	0	Bacteria	Bacteroidetes	Bacteroidia	Bacteroidales	Muribaculaceae
Otu002064	1	0	1	0	0	0	0	0	0	0	0.001426	0	0	0	0	0	0	Bacteria	Bacteroidetes	Bacteroidia	Bacteroidales	Muribaculaceae
Otu002084	1	0	0	0	0	1	0	0	0	0	0	0	0	0.001543	0	0	0	Bacteria	Firmicutes	Clostridia	Clostridiales	Lachnospiraceae	Lachnospiraceae_NK4A136_group
Otu002097	1	0	0	0	0	0	0	1	0	0	0	0	0	0	0	0.001837	0	Bacteria	Bacteroidetes	Bacteroidia	Bacteroidales	Muribaculaceae
Otu002098	1	0	0	0	0	1	0	0	0	0	0	0	0	0.001543	0	0	0	Bacteria	Actinobacteria	Actinobacteria	Micrococcales	Bogoriellaceae	Georgenia
Otu002128	1	0	1	0	0	0	0	0	0	0	0.001426	0	0	0	0	0	0	Bacteria	Firmicutes	Clostridia	Clostridiales	Ruminococcaceae	Ruminiclostridium_9
Otu002133	1	0	0	0	0	0	1	0	0	0	0	0	0	0	0.001972	0	0	Bacteria	Bacteroidetes	Bacteroidia	Bacteroidales	Muribaculaceae
Otu002135	1	0	0	0	0	0	0	0	1	0	0	0	0	0	0	0	0.001896	Bacteria	Bacteroidetes	Bacteroidia	Bacteroidales	Rikenellaceae	Alistipes
Otu002154	1	0	1	0	0	0	0	0	0	0	0.001426	0	0	0	0	0	0	Bacteria	Bacteroidetes	Bacteroidia	Bacteroidales
Otu002156	1	0	0	0	0	1	0	0	0	0	0	0	0	0.001543	0	0	0	Bacteria	Bacteroidetes	Bacteroidia	Bacteroidales	Muribaculaceae
Otu002158	1	0	0	0	0	1	0	0	0	0	0	0	0	0.001543	0	0	0	Bacteria	Bacteroidetes	Bacteroidia	Bacteroidales	Muribaculaceae
Otu002162	1	0	0	1	0	0	0	0	0	0	0	0.001765	0	0	0	0	0	Bacteria	Firmicutes	Clostridia	Clostridiales	Lachnospiraceae	Lachnospiraceae_UCG-010
Otu002166	1	0	1	0	0	0	0	0	0	0	0.001426	0	0	0	0	0	0	Bacteria	Bacteroidetes	Bacteroidia	Bacteroidales	Muribaculaceae
Otu002167	1	0	0	0	1	0	0	0	0	0	0	0	0.001626	0	0	0	0	Bacteria	Firmicutes	Erysipelotrichia	Erysipelotrichales	Erysipelotrichaceae	Dubosiella
Otu002173	1	0	0	0	0	0	0	0	1	0	0	0	0	0	0	0	0.001896	Bacteria	Proteobacteria	Alphaproteobacteria	Rhodobacterales	Rhodobacteraceae
Otu002180	1	0	1	0	0	0	0	0	0	0	0.001426	0	0	0	0	0	0	Bacteria	Bacteroidetes	Bacteroidia	Bacteroidales	Muribaculaceae
Otu002184	1	0	0	0	0	0	1	0	0	0	0	0	0	0	0.001972	0	0	Bacteria	Firmicutes	Clostridia	Clostridiales	Lachnospiraceae
Otu002189	1	0	0	0	0	1	0	0	0	0	0	0	0	0.001543	0	0	0	Bacteria	Bacteroidetes	Bacteroidia	Bacteroidales	Bacteroidaceae	Bacteroides
Otu002199	1	0	0	0	0	1	0	0	0	0	0	0	0	0.001543	0	0	0	Bacteria	Proteobacteria	Alphaproteobacteria	Reyranellales	Reyranellaceae	Reyranella
Otu002203	1	0	0	0	0	0	0	0	1	0	0	0	0	0	0	0	0.001896	Bacteria	Bacteroidetes	Bacteroidia	Bacteroidales	Muribaculaceae
Otu002239	1	0	1	0	0	0	0	0	0	0	0.001426	0	0	0	0	0	0	Bacteria	Bacteroidetes	Bacteroidia	Bacteroidales	Muribaculaceae
Otu002261	1	1	0	0	0	0	0	0	0	0.001792	0	0	0	0	0	0	0	Bacteria	Tenericutes	Mollicutes	Entomoplasmatales	Spiroplasmataceae	Spiroplasma
Otu002266	1	0	0	0	0	0	1	0	0	0	0	0	0	0	0.001972	0	0	Bacteria	Firmicutes	Clostridia	Clostridiales	Lachnospiraceae
Otu002270	1	0	1	0	0	0	0	0	0	0	0.001426	0	0	0	0	0	0	Bacteria	Bacteroidetes	Bacteroidia	Bacteroidales	Muribaculaceae
Otu002274	1	0	0	0	0	0	1	0	0	0	0	0	0	0	0.001972	0	0	Bacteria	Firmicutes	Clostridia	Clostridiales	Lachnospiraceae
Otu002284	1	0	1	0	0	0	0	0	0	0	0.001426	0	0	0	0	0	0	Bacteria	Verrucomicrobia	Verrucomicrobiae	Verrucomicrobiales	Akkermansiaceae	Akkermansia	Akkermansia_muciniphila
Otu002289	1	0	0	0	0	0	0	0	1	0	0	0	0	0	0	0	0.001896	Bacteria	Bacteroidetes	Bacteroidia	Bacteroidales	Muribaculaceae
Otu002291	1	0	0	1	0	0	0	0	0	0	0	0.001765	0	0	0	0	0	Bacteria	Firmicutes	Bacilli	Lactobacillales	Lactobacillaceae	Lactobacillus
Otu002294	1	0	0	0	1	0	0	0	0	0	0	0	0.001626	0	0	0	0	Bacteria	Firmicutes	Erysipelotrichia	Erysipelotrichales	Erysipelotrichaceae	Dubosiella
Otu002296	1	0	0	0	0	0	0	0	1	0	0	0	0	0	0	0	0.001896	Bacteria	Firmicutes	Clostridia	Clostridiales	Lachnospiraceae	Lachnospiraceae_NK4A136_group
Otu002298	1	0	0	0	1	0	0	0	0	0	0	0	0.001626	0	0	0	0	Bacteria	Bacteroidetes	Bacteroidia	Bacteroidales	Muribaculaceae
Otu002312	1	0	1	0	0	0	0	0	0	0	0.001426	0	0	0	0	0	0	Bacteria	Verrucomicrobia	Verrucomicrobiae	Verrucomicrobiales	Akkermansiaceae	Akkermansia	Akkermansia_muciniphila
Otu002319	1	0	1	0	0	0	0	0	0	0	0.001426	0	0	0	0	0	0	Bacteria	Verrucomicrobia	Verrucomicrobiae	Verrucomicrobiales	Akkermansiaceae	Akkermansia	Akkermansia_muciniphila
Otu002322	1	0	0	0	0	0	1	0	0	0	0	0	0	0	0.001972	0	0	Bacteria	Firmicutes	Clostridia	Clostridiales	Lachnospiraceae
Otu002323	1	0	0	0	1	0	0	0	0	0	0	0	0.001626	0	0	0	0	Bacteria	Firmicutes	Erysipelotrichia	Erysipelotrichales	Erysipelotrichaceae	Dubosiella
Otu002326	1	0	0	1	0	0	0	0	0	0	0	0.001765	0	0	0	0	0	Bacteria	Firmicutes	Clostridia	Clostridiales	Lachnospiraceae	Lachnospiraceae_NK4A136_group
Otu002332	1	0	0	0	0	0	1	0	0	0	0	0	0	0	0.001972	0	0	Bacteria	Firmicutes	Clostridia	Clostridiales	Ruminococcaceae
Otu002337	1	0	0	0	1	0	0	0	0	0	0	0	0.001626	0	0	0	0	Bacteria	Firmicutes	Erysipelotrichia	Erysipelotrichales	Erysipelotrichaceae	Dubosiella
Otu002339	1	0	0	0	0	0	0	0	1	0	0	0	0	0	0	0	0.001896	Bacteria	Bacteroidetes	Bacteroidia	Bacteroidales	Muribaculaceae
Otu002359	1	0	0	0	0	0	0	0	1	0	0	0	0	0	0	0	0.001896	Bacteria	Proteobacteria	Alphaproteobacteria	Rhizobiales	Xanthobacteraceae
Otu002367	1	0	0	0	1	0	0	0	0	0	0	0	0.001626	0	0	0	0	Bacteria	Bacteroidetes	Bacteroidia	Bacteroidales	Muribaculaceae
Otu002369	1	0	1	0	0	0	0	0	0	0	0.001426	0	0	0	0	0	0	Bacteria	Bacteroidetes	Bacteroidia	Bacteroidales
Otu002374	1	0	0	0	0	0	0	0	1	0	0	0	0	0	0	0	0.001896	Bacteria	Verrucomicrobia	Verrucomicrobiae	Verrucomicrobiales	Akkermansiaceae	Akkermansia	Akkermansia_muciniphila
Otu002381	1	0	0	0	0	1	0	0	0	0	0	0	0	0.001543	0	0	0	Bacteria	Bacteroidetes	Bacteroidia	Bacteroidales	Muribaculaceae
Otu002391	1	0	1	0	0	0	0	0	0	0	0.001426	0	0	0	0	0	0	Bacteria	Bacteroidetes	Bacteroidia	Bacteroidales	Muribaculaceae
Otu002408	1	1	0	0	0	0	0	0	0	0.001792	0	0	0	0	0	0	0	Bacteria	Firmicutes	Erysipelotrichia	Erysipelotrichales	Erysipelotrichaceae	Dubosiella
Otu002418	1	0	0	0	0	0	0	0	1	0	0	0	0	0	0	0	0.001896	Bacteria	Bacteroidetes	Bacteroidia	Bacteroidales	Prevotellaceae
Otu002427	1	0	0	0	0	0	0	1	0	0	0	0	0	0	0	0.001837	0	Bacteria	Proteobacteria	Gammaproteobacteria	Enterobacteriales	Enterobacteriaceae
Otu002429	1	0	0	0	0	1	0	0	0	0	0	0	0	0.001543	0	0	0	Bacteria	Bacteroidetes	Bacteroidia	Bacteroidales	Muribaculaceae
Otu002437	1	0	0	0	0	1	0	0	0	0	0	0	0	0.001543	0	0	0	Bacteria	Bacteroidetes	Bacteroidia	Bacteroidales	Muribaculaceae
Otu002446	1	0	1	0	0	0	0	0	0	0	0.001426	0	0	0	0	0	0	Bacteria	Verrucomicrobia	Verrucomicrobiae	Verrucomicrobiales	Akkermansiaceae	Akkermansia	Akkermansia_muciniphila
Otu002447	1	0	1	0	0	0	0	0	0	0	0.001426	0	0	0	0	0	0	Bacteria	Bacteroidetes	Bacteroidia	Bacteroidales	Muribaculaceae
Otu002449	1	0	0	0	0	1	0	0	0	0	0	0	0	0.001543	0	0	0	Bacteria	Proteobacteria	Deltaproteobacteria	Desulfovibrionales	Desulfovibrionaceae	Desulfovibrio	Desulfovibrio_fairfieldensis
Otu002454	1	0	0	0	0	1	0	0	0	0	0	0	0	0.001543	0	0	0	Bacteria	Bacteroidetes	Bacteroidia	Bacteroidales	Muribaculaceae
Otu002472	1	0	0	0	0	0	0	1	0	0	0	0	0	0	0	0.001837	0	Bacteria	Bacteroidetes	Bacteroidia	Bacteroidales	Muribaculaceae
Otu002478	1	0	0	0	0	1	0	0	0	0	0	0	0	0.001543	0	0	0	Bacteria	Bacteroidetes	Bacteroidia	Bacteroidales	Prevotellaceae
Otu002485	1	0	0	0	0	0	0	0	1	0	0	0	0	0	0	0	0.001896	Bacteria	Proteobacteria	Alphaproteobacteria	Rickettsiales	Mitochondria
Otu002489	1	0	0	0	0	1	0	0	0	0	0	0	0	0.001543	0	0	0	Bacteria	Bacteroidetes	Bacteroidia	Bacteroidales	Rikenellaceae	Alistipes
Otu002492	1	0	0	0	0	0	0	0	1	0	0	0	0	0	0	0	0.001896	Bacteria	Bacteroidetes	Bacteroidia	Bacteroidales	Prevotellaceae
Otu002493	1	0	0	1	0	0	0	0	0	0	0	0.001765	0	0	0	0	0	Bacteria	Proteobacteria	Gammaproteobacteria	Xanthomonadales	Xanthomonadaceae	Pseudoxanthomonas
Otu002506	1	0	0	0	0	0	0	0	1	0	0	0	0	0	0	0	0.001896	Bacteria	Bacteroidetes	Bacteroidia	Bacteroidales	Muribaculaceae
Otu002513	1	0	0	0	0	1	0	0	0	0	0	0	0	0.001543	0	0	0	Bacteria	Firmicutes	Erysipelotrichia	Erysipelotrichales	Erysipelotrichaceae	Dubosiella
Otu002514	1	0	0	0	0	0	0	0	1	0	0	0	0	0	0	0	0.001896	Bacteria
Otu002516	1	0	1	0	0	0	0	0	0	0	0.001426	0	0	0	0	0	0	Bacteria	Verrucomicrobia	Verrucomicrobiae	Verrucomicrobiales	Akkermansiaceae	Akkermansia	Akkermansia_muciniphila
Otu002518	1	0	0	0	0	1	0	0	0	0	0	0	0	0.001543	0	0	0	Bacteria	Bacteroidetes	Bacteroidia	Bacteroidales
Otu002529	1	0	0	0	1	0	0	0	0	0	0	0	0.001626	0	0	0	0	Bacteria	Bacteroidetes	Bacteroidia	Bacteroidales	Muribaculaceae
Otu002531	1	0	0	0	1	0	0	0	0	0	0	0	0.001626	0	0	0	0	Bacteria	Actinobacteria	Coriobacteriia	Coriobacteriales	Atopobiaceae
Otu002555	1	0	0	0	0	0	0	1	0	0	0	0	0	0	0	0.001837	0	Bacteria	Bacteroidetes	Bacteroidia	Bacteroidales	Muribaculaceae
Otu002556	1	0	0	0	0	0	0	1	0	0	0	0	0	0	0	0.001837	0	Bacteria	Bacteroidetes	Bacteroidia	Bacteroidales	Muribaculaceae
Otu002562	1	0	1	0	0	0	0	0	0	0	0.001426	0	0	0	0	0	0	Bacteria	Bacteroidetes	Bacteroidia	Bacteroidales	Muribaculaceae
Otu002568	1	0	0	0	0	0	0	0	1	0	0	0	0	0	0	0	0.001896	Bacteria	Bacteroidetes	Bacteroidia	Bacteroidales	Prevotellaceae
Otu002577	1	0	0	0	0	0	1	0	0	0	0	0	0	0	0.001972	0	0	Bacteria	Firmicutes	Negativicutes	Selenomonadales	Veillonellaceae	Quinella
Otu002583	1	0	1	0	0	0	0	0	0	0	0.001426	0	0	0	0	0	0	Bacteria	Verrucomicrobia	Verrucomicrobiae	Verrucomicrobiales	Akkermansiaceae	Akkermansia
Otu002591	1	0	0	0	0	0	0	1	0	0	0	0	0	0	0	0.001837	0	Bacteria	Bacteroidetes	Bacteroidia	Bacteroidales	Muribaculaceae
Otu002593	1	0	0	0	0	1	0	0	0	0	0	0	0	0.001543	0	0	0	Bacteria	Proteobacteria	Gammaproteobacteria	Betaproteobacteriales	Burkholderiaceae
Otu002599	1	0	0	0	0	0	0	1	0	0	0	0	0	0	0	0.001837	0	Bacteria	Proteobacteria	Gammaproteobacteria	Enterobacteriales	Enterobacteriaceae	Edwardsiella	Edwardsiella_tarda
Otu002603	1	0	0	1	0	0	0	0	0	0	0	0.001765	0	0	0	0	0	Bacteria	Firmicutes	Bacilli	Lactobacillales	Lactobacillaceae	Lactobacillus
Otu002609	1	1	0	0	0	0	0	0	0	0.001792	0	0	0	0	0	0	0	Bacteria
Otu002610	1	0	0	0	1	0	0	0	0	0	0	0	0.001626	0	0	0	0	Bacteria	Bacteroidetes	Bacteroidia	Bacteroidales	Muribaculaceae
Otu002618	1	0	0	1	0	0	0	0	0	0	0	0.001765	0	0	0	0	0	Bacteria	Firmicutes	Bacilli	Lactobacillales	Lactobacillaceae	Lactobacillus
Otu002621	1	0	0	0	0	1	0	0	0	0	0	0	0	0.001543	0	0	0	Bacteria	Firmicutes	Clostridia	Clostridiales	Lachnospiraceae
Otu002638	1	0	0	0	0	1	0	0	0	0	0	0	0	0.001543	0	0	0	Bacteria	Firmicutes	Clostridia	Clostridiales
Otu002639	1	0	0	0	0	0	0	1	0	0	0	0	0	0	0	0.001837	0	Bacteria	Bacteroidetes	Bacteroidia	Bacteroidales	Muribaculaceae
Otu002646	1	0	0	0	0	0	0	0	1	0	0	0	0	0	0	0	0.001896	Bacteria	Bacteroidetes	Bacteroidia	Bacteroidales	Muribaculaceae
Otu002651	1	0	0	0	0	1	0	0	0	0	0	0	0	0.001543	0	0	0	Bacteria	Firmicutes	Clostridia	Clostridiales	Lachnospiraceae
Otu002652	1	0	0	0	0	0	0	1	0	0	0	0	0	0	0	0.001837	0	Bacteria	Bacteroidetes	Bacteroidia	Bacteroidales	Muribaculaceae
Otu002654	1	0	0	0	0	1	0	0	0	0	0	0	0	0.001543	0	0	0	Bacteria	Bacteroidetes	Bacteroidia	Bacteroidales	Muribaculaceae
Otu002655	1	0	0	0	0	1	0	0	0	0	0	0	0	0.001543	0	0	0	Bacteria
Otu002677	1	0	1	0	0	0	0	0	0	0	0.001426	0	0	0	0	0	0	Bacteria	Verrucomicrobia	Verrucomicrobiae	Verrucomicrobiales	Akkermansiaceae	Akkermansia	Akkermansia_muciniphila
Otu002678	1	0	0	0	1	0	0	0	0	0	0	0	0.001626	0	0	0	0	Bacteria	Firmicutes	Clostridia	Clostridiales	Clostridiales_vadinBB60_group
Otu002684	1	0	1	0	0	0	0	0	0	0	0.001426	0	0	0	0	0	0	Bacteria	Firmicutes	Erysipelotrichia	Erysipelotrichales	Erysipelotrichaceae	Holdemania	Holdemania_massiliensis_AP2
Otu002702	1	1	0	0	0	0	0	0	0	0.001792	0	0	0	0	0	0	0	Bacteria	Proteobacteria	Alphaproteobacteria	Rhizobiales	Beijerinckiaceae	Methylobacterium
Otu002704	1	0	0	0	1	0	0	0	0	0	0	0	0.001626	0	0	0	0	Bacteria	Verrucomicrobia	Verrucomicrobiae	Verrucomicrobiales	Akkermansiaceae	Akkermansia	Akkermansia_muciniphila
Otu002705	1	0	1	0	0	0	0	0	0	0	0.001426	0	0	0	0	0	0	Bacteria	Bacteroidetes	Bacteroidia	Bacteroidales	Muribaculaceae
Otu002722	1	0	1	0	0	0	0	0	0	0	0.001426	0	0	0	0	0	0	Bacteria	Verrucomicrobia	Verrucomicrobiae	Verrucomicrobiales	Akkermansiaceae	Akkermansia	Akkermansia_muciniphila
Otu002729	1	0	1	0	0	0	0	0	0	0	0.001426	0	0	0	0	0	0	Bacteria	Bacteroidetes	Bacteroidia	Bacteroidales	Muribaculaceae
Otu002730	1	0	0	1	0	0	0	0	0	0	0	0.001765	0	0	0	0	0	Bacteria	Proteobacteria	Alphaproteobacteria	Rhizobiales	Stappiaceae	Stappia
Otu002732	1	0	1	0	0	0	0	0	0	0	0.001426	0	0	0	0	0	0	Bacteria	Bacteroidetes	Bacteroidia	Bacteroidales	Muribaculaceae
Otu002736	1	0	0	0	0	0	0	0	1	0	0	0	0	0	0	0	0.001896	Bacteria	Bacteroidetes	Bacteroidia	Bacteroidales	Muribaculaceae
Otu002746	1	0	1	0	0	0	0	0	0	0	0.001426	0	0	0	0	0	0	Bacteria	Bacteroidetes	Bacteroidia	Bacteroidales	Muribaculaceae
Otu002747	1	0	0	0	0	1	0	0	0	0	0	0	0	0.001543	0	0	0	Bacteria	Bacteroidetes	Bacteroidia	Bacteroidales	Muribaculaceae
Otu002748	1	0	0	0	1	0	0	0	0	0	0	0	0.001626	0	0	0	0	Bacteria	Actinobacteria	Actinobacteria	Bifidobacteriales	Bifidobacteriaceae	Bifidobacterium	Bifidobacterium_pseudolongum_PV8-2
Otu002757	1	0	1	0	0	0	0	0	0	0	0.001426	0	0	0	0	0	0	Bacteria	Bacteroidetes	Bacteroidia	Bacteroidales
Otu002759	1	0	1	0	0	0	0	0	0	0	0.001426	0	0	0	0	0	0	Bacteria	Bacteroidetes	Bacteroidia	Bacteroidales	Muribaculaceae
Otu002763	1	0	0	0	0	0	0	0	1	0	0	0	0	0	0	0	0.001896	Bacteria	Bacteroidetes	Bacteroidia	Bacteroidales	Prevotellaceae
Otu002774	1	0	0	0	0	0	0	1	0	0	0	0	0	0	0	0.001837	0	Bacteria	Firmicutes	Clostridia	Clostridiales	Lachnospiraceae	A2
Otu002794	1	0	0	1	0	0	0	0	0	0	0	0.001765	0	0	0	0	0	Bacteria	Proteobacteria	Gammaproteobacteria	Enterobacteriales	Enterobacteriaceae
Otu002799	1	0	1	0	0	0	0	0	0	0	0.001426	0	0	0	0	0	0	Bacteria	Verrucomicrobia	Verrucomicrobiae	Verrucomicrobiales	Akkermansiaceae	Akkermansia	Akkermansia_muciniphila
Otu002809	1	0	0	0	0	1	0	0	0	0	0	0	0	0.001543	0	0	0	Bacteria	Firmicutes	Clostridia	Clostridiales	Lachnospiraceae
Otu002814	1	0	0	0	0	0	1	0	0	0	0	0	0	0	0.001972	0	0	Bacteria	Firmicutes	Clostridia	Clostridiales	Lachnospiraceae
Otu002816	1	0	1	0	0	0	0	0	0	0	0.001426	0	0	0	0	0	0	Bacteria	Verrucomicrobia	Verrucomicrobiae	Verrucomicrobiales	Akkermansiaceae	Akkermansia
Otu002823	1	0	0	0	0	0	0	0	1	0	0	0	0	0	0	0	0.001896	Bacteria	Bacteroidetes	Bacteroidia	Bacteroidales	Muribaculaceae
Otu002825	1	0	0	0	0	0	0	0	1	0	0	0	0	0	0	0	0.001896	Bacteria	Bacteroidetes	Bacteroidia	Bacteroidales	Muribaculaceae
Otu002831	1	0	1	0	0	0	0	0	0	0	0.001426	0	0	0	0	0	0	Bacteria	Verrucomicrobia	Verrucomicrobiae	Verrucomicrobiales	Akkermansiaceae	Akkermansia	Akkermansia_muciniphila
Otu002863	1	0	1	0	0	0	0	0	0	0	0.001426	0	0	0	0	0	0	Bacteria	Bacteroidetes	Bacteroidia	Bacteroidales	Muribaculaceae
Otu002877	1	0	0	0	0	1	0	0	0	0	0	0	0	0.001543	0	0	0	Bacteria	Firmicutes	Clostridia	Clostridiales	Lachnospiraceae
Otu002881	1	0	0	0	0	0	0	0	1	0	0	0	0	0	0	0	0.001896	Bacteria	Bacteroidetes	Bacteroidia	Bacteroidales	Prevotellaceae
Otu002885	1	0	1	0	0	0	0	0	0	0	0.001426	0	0	0	0	0	0	Bacteria	Bacteroidetes	Bacteroidia	Bacteroidales	Muribaculaceae
Otu002888	1	0	0	0	0	0	0	1	0	0	0	0	0	0	0	0.001837	0	Bacteria	Firmicutes	Bacilli	Lactobacillales	Lactobacillaceae	Lactobacillus
Otu002904	1	0	0	0	0	1	0	0	0	0	0	0	0	0.001543	0	0	0	Bacteria	Bacteroidetes	Bacteroidia	Bacteroidales	Prevotellaceae	Alloprevotella
Otu002921	1	0	0	1	0	0	0	0	0	0	0	0.001765	0	0	0	0	0	Bacteria	Firmicutes	Bacilli	Lactobacillales	Lactobacillaceae	Lactobacillus	Lactobacillus_murinus
Otu002923	1	0	0	0	0	0	1	0	0	0	0	0	0	0	0.001972	0	0	Bacteria	Firmicutes	Bacilli	Lactobacillales	Lactobacillaceae	Lactobacillus
Otu002932	1	0	0	1	0	0	0	0	0	0	0	0.001765	0	0	0	0	0	Bacteria	Firmicutes	Clostridia	Clostridiales	Clostridiaceae_1	Candidatus_Arthromitus	Candidatus_Arthromitus_sp_SFB-mouse-Japan
Otu002942	1	0	0	0	0	0	1	0	0	0	0	0	0	0	0.001972	0	0	Bacteria	Firmicutes	Bacilli	Lactobacillales	Lactobacillaceae	Lactobacillus
Otu002943	1	0	0	0	0	1	0	0	0	0	0	0	0	0.001543	0	0	0	Bacteria	Bacteroidetes	Bacteroidia	Bacteroidales	Muribaculaceae
Otu002955	1	0	0	0	1	0	0	0	0	0	0	0	0.001626	0	0	0	0	Bacteria	Bacteroidetes	Bacteroidia	Bacteroidales	Muribaculaceae
Otu002957	1	0	0	0	1	0	0	0	0	0	0	0	0.001626	0	0	0	0	Bacteria	Firmicutes	Erysipelotrichia	Erysipelotrichales	Erysipelotrichaceae	Allobaculum
Otu002968	1	0	0	0	0	0	0	1	0	0	0	0	0	0	0	0.001837	0	Bacteria	Bacteroidetes	Bacteroidia	Bacteroidales	Muribaculaceae	Muribaculum	Parabacteroides_sp_YL27
Otu002998	1	0	0	0	0	0	1	0	0	0	0	0	0	0	0.001972	0	0	Bacteria	Firmicutes	Clostridia	Clostridiales	Lachnospiraceae
Otu003005	1	0	1	0	0	0	0	0	0	0	0.001426	0	0	0	0	0	0	Bacteria	Bacteroidetes	Bacteroidia	Bacteroidales	Muribaculaceae
Otu003010	1	0	0	0	1	0	0	0	0	0	0	0	0.001626	0	0	0	0	Bacteria	Bacteroidetes	Bacteroidia	Bacteroidales	Muribaculaceae
Otu003014	1	0	0	0	0	0	1	0	0	0	0	0	0	0	0.001972	0	0	Bacteria	Firmicutes	Clostridia	Clostridiales	Ruminococcaceae	Anaerotruncus	Anaerotruncus_sp_G32012
Otu003020	1	0	1	0	0	0	0	0	0	0	0.001426	0	0	0	0	0	0	Bacteria	Verrucomicrobia	Verrucomicrobiae	Verrucomicrobiales	Akkermansiaceae	Akkermansia	Akkermansia_muciniphila
Otu003022	1	0	0	0	0	0	0	0	1	0	0	0	0	0	0	0	0.001896	Bacteria	Firmicutes	Clostridia	Clostridiales	Lachnospiraceae	ASF356
Otu003034	1	0	0	0	0	0	1	0	0	0	0	0	0	0	0.001972	0	0	Bacteria	Firmicutes	Clostridia	Clostridiales	Lachnospiraceae
Otu003035	1	0	0	0	0	0	0	1	0	0	0	0	0	0	0	0.001837	0	Bacteria	Bacteroidetes	Bacteroidia	Bacteroidales	Tannerellaceae	Parabacteroides
Otu003036	1	0	1	0	0	0	0	0	0	0	0.001426	0	0	0	0	0	0	Bacteria	Bacteroidetes	Bacteroidia	Bacteroidales	Muribaculaceae
Otu003044	1	0	1	0	0	0	0	0	0	0	0.001426	0	0	0	0	0	0	Bacteria	Verrucomicrobia	Verrucomicrobiae	Verrucomicrobiales	Akkermansiaceae	Akkermansia	Akkermansia_muciniphila
Otu003057	1	0	1	0	0	0	0	0	0	0	0.001426	0	0	0	0	0	0	Bacteria	Bacteroidetes	Bacteroidia	Bacteroidales	Muribaculaceae
Otu003079	1	1	0	0	0	0	0	0	0	0.001792	0	0	0	0	0	0	0	Bacteria	Firmicutes	Bacilli	Lactobacillales	Lactobacillaceae	Lactobacillus	Lactobacillus_murinus
Otu003080	1	0	0	0	0	1	0	0	0	0	0	0	0	0.001543	0	0	0	Bacteria	Firmicutes	Clostridia	Clostridiales	Ruminococcaceae
Otu003081	1	0	1	0	0	0	0	0	0	0	0.001426	0	0	0	0	0	0	Bacteria	Verrucomicrobia	Verrucomicrobiae	Verrucomicrobiales	Akkermansiaceae	Akkermansia
Otu003087	1	0	0	0	0	0	0	0	1	0	0	0	0	0	0	0	0.001896	Bacteria	Bacteroidetes	Bacteroidia	Bacteroidales	Muribaculaceae
Otu003095	1	0	0	0	0	0	0	0	1	0	0	0	0	0	0	0	0.001896	Bacteria	Firmicutes
Otu003096	1	0	1	0	0	0	0	0	0	0	0.001426	0	0	0	0	0	0	Bacteria	Verrucomicrobia	Verrucomicrobiae	Verrucomicrobiales	Akkermansiaceae	Akkermansia	Akkermansia_muciniphila
Otu003098	1	1	0	0	0	0	0	0	0	0.001792	0	0	0	0	0	0	0	Bacteria	Firmicutes	Bacilli	Lactobacillales	Lactobacillaceae	Lactobacillus
Otu003103	1	0	1	0	0	0	0	0	0	0	0.001426	0	0	0	0	0	0	Bacteria	Verrucomicrobia	Verrucomicrobiae	Verrucomicrobiales	Akkermansiaceae	Akkermansia	Akkermansia_muciniphila
Otu003109	1	0	0	0	0	1	0	0	0	0	0	0	0	0.001543	0	0	0	Bacteria	Firmicutes	Bacilli	Lactobacillales	Lactobacillaceae	Lactobacillus
Otu003110	1	0	0	0	0	0	0	1	0	0	0	0	0	0	0	0.001837	0	Bacteria	Bacteroidetes	Bacteroidia	Bacteroidales	Muribaculaceae
Otu003117	1	0	0	0	0	1	0	0	0	0	0	0	0	0.001543	0	0	0	Bacteria	Firmicutes	Bacilli	Lactobacillales	Lactobacillaceae	Lactobacillus
Otu003133	1	0	1	0	0	0	0	0	0	0	0.001426	0	0	0	0	0	0	Bacteria	Verrucomicrobia	Verrucomicrobiae	Verrucomicrobiales	Akkermansiaceae	Akkermansia	Akkermansia_muciniphila
Otu003145	1	0	1	0	0	0	0	0	0	0	0.001426	0	0	0	0	0	0	Bacteria	Bacteroidetes	Bacteroidia	Bacteroidales	Muribaculaceae
Otu003152	1	0	0	0	0	0	0	1	0	0	0	0	0	0	0	0.001837	0	Bacteria	Bacteroidetes	Bacteroidia	Bacteroidales	Muribaculaceae
Otu003154	1	0	0	0	0	0	0	0	1	0	0	0	0	0	0	0	0.001896	Bacteria	Firmicutes	Erysipelotrichia	Erysipelotrichales	Erysipelotrichaceae	Dubosiella
Otu003179	1	0	1	0	0	0	0	0	0	0	0.001426	0	0	0	0	0	0	Bacteria	Verrucomicrobia	Verrucomicrobiae	Verrucomicrobiales	Akkermansiaceae	Akkermansia	Akkermansia_muciniphila
Otu003202	1	0	0	0	0	1	0	0	0	0	0	0	0	0.001543	0	0	0	Bacteria	Bacteroidetes	Bacteroidia	Bacteroidales	Prevotellaceae	Alloprevotella
Otu003206	1	0	0	0	0	0	0	0	1	0	0	0	0	0	0	0	0.001896	Bacteria	Bacteroidetes	Bacteroidia	Bacteroidales	Prevotellaceae	Alloprevotella
Otu003208	1	0	0	0	0	0	0	0	1	0	0	0	0	0	0	0	0.001896	Bacteria	Bacteroidetes	Bacteroidia	Cytophagales	Cyclobacteriaceae	Algoriphagus	Algoriphagus_marincola_DSM_16067
Otu003234	1	0	0	0	0	0	0	0	1	0	0	0	0	0	0	0	0.001896	Bacteria	Bacteroidetes	Bacteroidia	Bacteroidales	Prevotellaceae
Otu003237	1	0	0	0	0	0	1	0	0	0	0	0	0	0	0.001972	0	0	Bacteria	Firmicutes	Bacilli	Lactobacillales	Lactobacillaceae	Lactobacillus	Lactobacillus_murinus
Otu003238	1	0	0	0	0	1	0	0	0	0	0	0	0	0.001543	0	0	0	Bacteria	Firmicutes	Clostridia	Clostridiales	Ruminococcaceae	Ruminiclostridium_9
Otu003244	1	0	0	0	0	0	1	0	0	0	0	0	0	0	0.001972	0	0	Bacteria	Bacteroidetes	Bacteroidia	Bacteroidales	Rikenellaceae	Alistipes
Otu003253	1	0	0	0	0	0	0	0	1	0	0	0	0	0	0	0	0.001896	Bacteria	Bacteroidetes	Bacteroidia	Bacteroidales	Muribaculaceae
Otu003266	1	0	0	0	0	1	0	0	0	0	0	0	0	0.001543	0	0	0	Bacteria	Bacteroidetes	Bacteroidia	Bacteroidales	Muribaculaceae
Otu003286	1	0	0	0	0	1	0	0	0	0	0	0	0	0.001543	0	0	0	Bacteria	Bacteroidetes	Bacteroidia	Bacteroidales	Prevotellaceae
Otu003288	1	0	0	0	0	1	0	0	0	0	0	0	0	0.001543	0	0	0	Bacteria	Bacteroidetes	Bacteroidia	Bacteroidales	Muribaculaceae
Otu003292	1	0	0	0	0	1	0	0	0	0	0	0	0	0.001543	0	0	0	Bacteria	Bacteroidetes	Bacteroidia	Bacteroidales	Muribaculaceae
Otu003301	1	0	0	0	0	0	0	1	0	0	0	0	0	0	0	0.001837	0	Bacteria	Bacteroidetes	Bacteroidia	Bacteroidales	Muribaculaceae
Otu003310	1	0	0	0	0	1	0	0	0	0	0	0	0	0.001543	0	0	0	Bacteria	Bacteroidetes	Bacteroidia	Bacteroidales	Muribaculaceae
Otu003311	1	0	0	1	0	0	0	0	0	0	0	0.001765	0	0	0	0	0	Bacteria	Firmicutes	Bacilli	Lactobacillales	Lactobacillaceae	Lactobacillus	Lactobacillus_murinus
Otu003314	1	0	0	0	0	1	0	0	0	0	0	0	0	0.001543	0	0	0	Bacteria	Firmicutes	Clostridia	Clostridiales
Otu003329	1	0	0	0	0	0	1	0	0	0	0	0	0	0	0.001972	0	0	Bacteria	Firmicutes	Bacilli	Lactobacillales	Lactobacillaceae	Lactobacillus	Lactobacillus_murinus
Otu003339	1	0	0	0	0	1	0	0	0	0	0	0	0	0.001543	0	0	0	Bacteria	Bacteroidetes	Bacteroidia	Bacteroidales	Prevotellaceae
Otu003345	1	0	0	1	0	0	0	0	0	0	0	0.001765	0	0	0	0	0	Bacteria	Bacteroidetes	Bacteroidia	Flavobacteriales	Weeksellaceae
Otu003351	1	0	0	0	0	0	0	0	1	0	0	0	0	0	0	0	0.001896	Bacteria	Bacteroidetes	Bacteroidia	Bacteroidales	Muribaculaceae
Otu003353	1	0	1	0	0	0	0	0	0	0	0.001426	0	0	0	0	0	0	Bacteria
Otu003367	1	0	1	0	0	0	0	0	0	0	0.001426	0	0	0	0	0	0	Bacteria	Bacteroidetes	Bacteroidia	Bacteroidales	Muribaculaceae
Otu003386	1	0	0	0	0	0	0	1	0	0	0	0	0	0	0	0.001837	0	Bacteria	Bacteroidetes	Bacteroidia	Bacteroidales	Muribaculaceae
[truncated: 532 more rows]

## Sheet: all.tags_otus.stat
SampleID	Total Tags	Unique Tags	Taxon Tags	Unclassified Tags	Singleton Tags	OTUs
UnFMT-1	58260	26831	55796	0	2464	598
UnFMT-2	81471	37118	70102	0	11369	615
UnFMT-3	58957	28494	56657	0	2300	555
UnFMT-4	64475	32016	61494	0	2981	721
FMT-1	72783	43476	64819	0	7964	754
FMT-2	55055	30208	50705	0	4350	544
FMT-3	58513	32643	54445	0	4068	673
FMT-4	67229	41560	52740	0	14489	718
Avg	64592.9	34043.2	58344.8	0	6248.12	647.25
