# Supplementary material for: Gut Microbiome Contributes to Liver Fibrosis Impact on T Cell Receptor Immune Repertoire
Source: Front Microbiol. 2020 Nov 27;11:571847. doi: 10.3389/fmicb.2020.571847 (PMC7729130; doi:10.3389/fmicb.2020.571847)
Supplement: Supplementary file 12 [file Table_12.XLSX]

## Sheet: CDR3 AA clusters
		UnFMT					FMT
	Sequence	Sample 1	Sample 2	Sample 3	Sample 4	Sample 5	Sample 1	Sample 2	Sample 3	Sample 4	Sample 5	p.kmeans.cluster
8822	GAAGTACTGCTCATAGAAGTCCCGGGAACTGCA	0	0	0	0	0	0.606257	0	0	0.0431758	0	1
14749	TGCAGTTCCCGGGACTTCTATGAGCAGTACTTC	0	0	0	0	0	0.594479	0	0	0.0464979	0	1
16951	TGTGCCAGCAGCCAGGCAGGAGATGGGGAACAGTACTTC	0	0	0	0	0	0.000925791	0	0	5.53678e-05	0	1
82	AAAAAGCGGAGCCTGGTTGCCCCGCCTGCA	0	0	0	0	0	0	0	0	0	0	2
2032	AAAGTACAAGGTGTTTTGACCCTGTAGATCTGCACTGCA	0	0	0	0	0	0	0	0	0	0	2
4005	AAAGTAGAGCTGCCCGGTGTTTCTGTCGAAACTGCTAGCACA	0	0	0	0	0	0	0	0	0	0	2
4241	AAAGTAGAGGGGCGAATTATACCCCCCATCTTGGCTGCTGGCACA	0	0	0	0	0	0	0	0	0	0	2
5585	GAACTGCTCAGCAAGCCCCCCCAGTCCCCCACTGCA	0	0	0	0	0	0	0	0	0	0	2
9843	GAAGTACTGTTCATAGGAGAGCCCCGGGTCTGCACTGCA	0.000137345	0	0	0	0	0	0	0	0	0	2
12003	TGCAGTGCAGACCCGGGGCTCTCCTATGAACAGTACTTC	0.000120177	0	0	0	0	0	0	0	0	0	2
12501	TGCAGTGCAGATCTACAGGGTCAAAACACCTTGTACTTT	0	0	0	0	0	0	0	0	0	0	2
13399	TGCAGTGCATTCCGGGAGAACACAGAAGTCTTC	0	0	0	0	0	0	0	0	0	0	2
14338	TGCAGTGGCCACGCAAACACAGAAGTCTTC	0	0	0	0	0	0	0	0	0	0	2
15768	TGTGCCAGCAGCCAAACAGGGACCACAGAAGTCTTC	0	0	0	0	0	0	0	0	0	0	2
19885	TGTGCCAGCGGTGAGGACTGGGGGCAAGACACCCAGTACTTT	0	0	0	0	0	0	0	0	0	0	2
17	AAAAAGCGGAGCCTCCCCCCTCGGATCTGCACTGCA	0	0	0	0	0	0.0444076	0	0	0	0	3
20	AAAAAGCGGAGCCTCCCTCTCATCTAAGCTGCTTGCACA	0	0	0	0	0	0.000500838	0	0	0	0	3
25	AAAAAGCGGAGCCTGACCCCTGTCCCGGGCGCTGCTGGCACA	0	0	0	0	0	0.000121415	0	0	0	0	3
29	AAAAAGCGGAGCCTGCCCCCCTGTCCCGCTCCAGGCACA	0	0	0	0	0	0.000364246	0	0	0	0	3
79	AAAAAGCGGAGCCTGGTTGCCCCCTGGATCTTGGCTGCTGGCACA	0	0	0	0	0	0.0904392	0	0	0	0	3
92	AAAAAGCGGAGCCTGGTTGCCTTCTGTCCTTTGGCTGCTGGCACA	0	0	0	0	0	0.0481411	0	0	0	0	3
101	AAAAAGCGGAGCCTGGTTGGCCCCCTGTCCGGCACTGCA	0	0	0	0	0	0.0289727	0	0	0	0	3
155	AAAAAGCGGAGCCTGGTTGTTATCCCGGGCACTGCA	0	0	0	0	0	0.296709	0	0	0	0	3
171	AAAAAGCGGAGCCTGGTTGTTATTGTCCCCGCTGGCACA	0	0	0	0	0	0.0703146	0	0	0	0	3
197	AAAAAGCGGAGCCTGGTTGTTTTGTCCCACACTGCA	0	0	0	0	0	0.0171196	0	0	0	0	3
206	AAAAAGCGGAGCCTGTTCACCACCGCTGGCACA	0	0	0	0	0	0.000333892	0	0	0	0	3
219	AAAACACAGCGTTTCACGCCCCTCCCCGCTGGCACA	0	0	0	0	0	0.0044013	0	0	0	0	3
223	AAAACAGAGCGTATTCCCAGAATTGTCCCCTGCACTGCA	0	0	0	0	0	0.000227654	0	0	0	0	3
233	AAAAGGCGGAGCCCCTCCCTCTTGGCTGCTGGCACA	0	0	0	0	0	0.00173017	0	0	0	0	3
240	AAAAGGCGGAGCCTGGTTGTTAGCCCCCAGATCTGCACTGCA	0	0	0	0	0	0.00259525	0	0	0	0	3
251	AAAATACAGCGCTTCTGCACTACGGTCGGGGCTGCTGGCACA	0	0	0	0	0	0.00165428	0	0	0	0	3
253	AAAATACAGCGCTTCTGCACTACTCGCATCACTGCTGGCACA	0	0	0	0	0	0.000166946	0	0	0	0	3
265	AAAATACAGCGTCTCTGCAAAAGTTTGGCTGCTGGCACA	0	0	0	0	0	0.00147216	0	0	0	0	3
269	AAAATACAGCGTCTCTGCACTACCCCCGTCTTGGCTGCTGGCACA	0	0	0	0	0	0.00376387	0	0	0	0	3
281	AAAATACAGCGTTCCTGCACTAGCCCCCAGTGGGCTGCTGGCACA	0	0	0	0	0	0.00364246	0	0	0	0	3
283	AAAATACAGCGTTCCTGCATTCCCCTGTCCCTCTGCTCTGCA	0	0	0	0	0	0.000303538	0	0	0	0	3
318	AAAATACAGCGTTTCCGCACTAGTTGTCTGGCTGCTGGCACA	0	0	0	0	0	0.00153287	0	0	0	0	3
328	AAAATACAGCGTTTCGGTACCCTCCCTGTCTTGGCTGCTGGCACA	0	0	0	0	0	0.00294432	0	0	0	0	3
337	AAAATACAGCGTTTCTCCCCAGTCCACACTGTAGGTGCA	0	0	0	0	0	0.00127486	0	0	0	0	3
351	AAAATACAGCGTTTCTGAACGCGCCCCCGCGTCTTGGCTGCTGGCACA	0	0	0	0	0	0.485661	0	0	0	0	3
370	AAAATACAGCGTTTCTGCAACAGTTAAGCTGCTGGCACA	0	0	0	0	0	0.00110791	0	0	0	0	3
378	AAAATACAGCGTTTCTGCAACCCCCCCAGTCCCTTGGCTGCTGGCACA	0	0	0	0	0	0.0532254	0	0	0	0	3
390	AAAATACAGCGTTTCTGCAAGCCCCCAGTCTTCTTGGCTGCTGGCACA	0	0	0	0	0	0.000166946	0	0	0	0	3
397	AAAATACAGCGTTTCTGCACCACCCCCAGTCCCTCTGCA	0	4.91053e-05	0	0	0	0.14755	0	0	0	0	3
414	AAAATACAGCGTTTCTGCACCCCCCCAGGGATCTGCACTGCGGGTGCA	0	0	0	0	0	0.0031568	0	0	0	0	3
425	AAAATACAGCGTTTCTGCACCCCCGCCCCCCCAGTCCTGGCTGCTGGCACA	0	0	0	0	0	0.00215512	0	0	0	0	3
439	AAAATACAGCGTTTCTGCACCCCTTCCCCAAAAACTGCTGGCACA	0	0	0	0	0	0.00151769	0	0	0	0	3
445	AAAATACAGCGTTTCTGCACCCGCCCCTGTCCCTGCACTGCGGGTGCA	0	0	0	0	0	0.0160268	0	0	0	0	3
451	AAAATACAGCGTTTCTGCACCCGTCCCAGACGTATCTTGGCTGCTGGCACA	0	0	0	0	0	0.464884	0	0	0	0	3
456	AAAATACAGCGTTTCTGCACCCTCCCCTGTTTGGCTGCCGGCACA	0	0	0	0	0	0.0059797	0	0	0	0	3
508	AAAATACAGCGTTTCTGCACTAAGACCCCCTGGATCCCTAGCACCACA	0	0	0	0	0	0.000364246	0	0	0	0	3
512	AAAATACAGCGTTTCTGCACTAAGGTCCCCTGCGCTGCA	0	0	0	0	0	0.00286844	0	0	0	0	3
539	AAAATACAGCGTTTCTGCACTACCCGCACCACCGTTGGCACA	0	0	0	0	0	0.00449236	0	0	0	0	3
553	AAAATACAGCGTTTCTGCACTACTGTCTTGGTTGCTGGCACA	0	0	0	0	0	0.00112309	0	0	0	0	3
562	AAAATACAGCGTTTCTGCACTAGACCCCCAGTCTGGGCTGCCGGCACA	0	0	0	0	0	0.00314162	0	0	0	0	3
649	AAAATACAGCGTTTCTGCACTAGTCCCCTGCCCGTCTGCACTGCA	0	0	0	0	0	0.96815	0	0	0	0	3
651	AAAATACAGCGTTTCTGCACTAGTCCCTCCTTCTTGGCTGCTGGCGCA	0	0	0	0	0	0.00311127	0	0	0	0	3
656	AAAATACAGCGTTTCTGCACTAGTTCCCCAGGGACCTGCCCTGCA	0	0	0	0	0	0.000136592	0	0	0	0	3
657	AAAATACAGCGTTTCTGCACTAGTTCCCCAGTCTTGGCTGCTGGCACA	0	0	0	0	0	0.00150251	0	0	0	0	3
686	AAAATACAGCGTTTCTGCACTATTCCTGCGATCTGCACTGCA	0.000103009	0	0	0	0	0.391503	0	0	0	0	3
688	AAAATACAGCGTTTCTGCACTATTGGGGCTGCTGACACA	0	0	0	0	0	0.000819553	0	0	0	0	3
699	AAAATACAGCGTTTCTGCACTCCCCCAGTCCCCTGCACTGCA	0	0	0.000112189	0	0	0.466842	0	0	0	0	3
703	AAAATACAGCGTTTCTGCACTCCCCCAGTCGGCACTGCTGGTGCA	0	0	0	0	0	0.00475037	0	0	0	0	3
721	AAAATACAGCGTTTCTGCACTCCCTGCCCCAATATCTGCACTGCA	0	0	0	0	0	0.00218547	0	0	0	0	3
760	AAAATACAGCGTTTCTGCACTGTCCCTCAAACTGCA	0	0	0	0	0	0.00063743	0	0	0	0	3
761	AAAATACAGCGTTTCTGCACTGTCCCTGCTGGCACA	0	0	0	0	0	0.928599	0	0	0	0	3
769	AAAATACAGCGTTTCTGCACTTCCCCAATCTTGGCTGCA	0	0	0	0	0	0.000591899	0	0	0	0	3
775	AAAATACAGCGTTTCTGCACTTCCCCTGTCCCGGCCACTGCA	0	0	0	0	0	0.116589	0	0	0	0	3
780	AAAATACAGCGTTTCTGCACTTTCCCCGGGGCTGCTGACACA	0	0	0	0	0	0.00063743	0	0	0	0	3
783	AAAATACAGCGTTTCTGCAGACCCCTGTTTTGCACTGCAGGTGCAGTACAAGGTTCTGCCCTGGCTGCTGGCACA	0	0	0	0	0	0.000242831	0	0	0	0	3
792	AAAATACAGCGTTTCTGCAGGCGCCCCCCACTCTTGGCTGCTGGCACA	0	0	0	0	0	0.0224466	0	0	0	0	3
795	AAAATACAGCGTTTCTGCAGGCGCCCCTGTGAGGCTGCTGGCACA	0	0	0	0	0	9.10614e-05	0	0	0	0	3
817	AAAATACAGCGTTTCTGCATGCGCCCCCCCAGGATCTGCACTGCA	0	0	0	0	0	0.185553	0	0	0	0	3
822	AAAATACAGCGTTTCTGCATTCCCTGCCCTTTTGCTGGCACA	0	0	0	0	0	0.0254668	0	0	0	0	3
846	AAAATACAGCGTTTCTGCCCCCTGTCCCCTAGCACCACA	0	0	0	0	0	0.000121415	0	0	0	0	3
847	AAAATACAGCGTTTCTGCCCCCTGTCCCCTATCTGCACTGCA	0	0	0	0	0	0.204509	0	0	0	0	3
858	AAAATACAGCGTTTCTGCCCTCCCCCCCCCACCTGCACTGCA	0	0	0	0	0	9.10614e-05	0	0	0	0	3
860	AAAATACAGCGTTTCTGCCCTCCCTGTCCCATCACTGCCGGCACA	0	0	0	0	0	0.00705726	0	0	0	0	3
861	AAAATACAGCGTTTCTGCCCTCTCCGCACTGTAGGTGCA	0	0	0	0	0	0.000925791	0	0	0	0	3
874	AAAATACAGCGTTTCTGCGCCCCTGTCCCGGAGGGCACTGCA	0	0	0	0	0	0.00383976	0	0	0	0	3
906	AAAATACAGCGTTTCTGCTCTCCCTGTCCCGAGGCTGCTGGCACA	0	0	0	0	0	0.093338	0	0	0	0	3
910	AAAATACAGCGTTTCTGCTGCGCCCCCTGTCCCACCGCTGGCACA	0	0	0	0	0	0.00115344	0	0	0	0	3
934	AAAATACAGCGTTTCTGTCCCTGCACTGCAGGTGCAGTACAAGGTTCTGCCCTGGCTCATGTTGGCACA	0	0	0	0	0	0.00207924	0	0	0	0	3
956	AAAATACAGCGTTTTTCCCTGTTCCCTAGCACCACA	0	0	0	0	0	0.000258007	0	0	0	0	3
986	AAAATACGGCGTTTCTGCACTAGACCCAGTCCCTAAACTGCTGGCACA	0	0	0	0	0	0.00233724	0	0	0	0	3
987	AAAATACGGCGTTTCTGCACTAGATAACTCTTGGCTGCTGGCACA	0	0	0	0	0	0.00305056	0	0	0	0	3
991	AAAATACGGCGTTTCTGCACTATTTGTCCCAGGGCTGCTGGCACA	0	0	0	0	0	0.00245866	0	0	0	0	3
993	AAAATACGGCGTTTCTGCAGACCCCTGTTTTGCACTGCA	0	0	0	0	0	0.00379423	0	0	0	0	3
997	AAAATACGGCGTTTCTGTGAACGGTTCTTGGCTGCTGGCACA	0	0	0	0	0	0.000940968	0	0	0	0	3
999	AAAATACTGCGTTTCTGCACCCTCCCTGTCCCCCGCATCACTGCTGGCACA	0	0	0	0	0	0.00253454	0	0	0	0	3
1002	AAAATACTGCGTTTCTGCACTAGCTCCCCAGGGATCTGCACTGCA	0	0	0	0	0	0.000151769	0	0	0	0	3
1004	AAAATACTGGGTGTCTTGCCCAGTAGGGAGCTGGCA	0	0	0	0	0	7.58845e-05	0	0	0	0	3
1006	AAAATAGAGCGTACTTCCAACCGCCCCCTGGCTGCTGGCACA	0	0	0	0	0	0.00119898	0	0	0	0	3
1025	AAAATAGAGCGTATTTCCAACCCCCCTGTCCCGAACTGCACTGCAGGTGCAGTACAAGGTTCTGCACCTGCAGTGCAGGGGGGAGGCAAAACACCTTGTACTTTGAACCCCGACACCGCTGGCACA	0	0	0	0	0	0.000151769	0	0	0	0	3
1026	AAAATAGAGCGTATTTCCAACCCCCCTGTCCCGAACTGCGCTGCA	0	0	0	0	0	0.0027622	0	0	0	0	3
1041	AAAATAGAGCGTATTTCCACTCCCTCCTGCACTGCA	0	0	0	0	0	0.0935808	0	0	0	0	3
1089	AAAATAGAGCGTATTTCCAGAACTTGCACTGCA	0	0	0	0	0	0.440479	0	0	0	0	3
1097	AAAATAGAGCGTATTTCCAGAAGATGTATCTGCACTGCAGGTGCAGTACAAGGTTCTGCCCTGGCTGCTGGCACA	0	0	0	0	0	0.000364246	0	0	0	0	3
1109	AAAATAGAGCGTATTTCCAGAAGTGTCCGGGCTGCTGGCACA	0	0	0	0	0	0.0308547	0	0	0	0	3
1118	AAAATAGAGCGTATTTCCAGAATCCCCATCACTGCTGGCACA	0	0	0	0	0	0.0409625	0	0	0	0	3
1125	AAAATAGAGCGTATTTCCAGAATCCCGTAAACTGCTAGCACA	0	0	0	0	0	0.0461985	0	0	0	0	3
1128	AAAATAGAGCGTATTTCCAGAATCCGTCCAACTGCA	0	0	0	0	0	0.0413722	0	0	0	0	3
1147	AAAATAGAGCGTATTTCCAGAATTCCCACCATCTTGGCTGCA	0	0	0	0	0	0.000804376	0	0	0	0	3
1151	AAAATAGAGCGTATTTCCAGAATTCTGCCTTCTAGCACCACA	0	0	0	0	0	0.000106238	0	0	0	0	3
1177	AAAATAGAGCGTATTTCCAGAATTTTCTGTACCGCA	0	0	0	0	0	7.58845e-05	0	0	0	0	3
1186	AAAATAGAGCGTATTTCCAGACCCCGTCGGACTGCGGGTGCA	0	0	0	0	0	9.10614e-05	0	0	0	0	3
1187	AAAATAGAGCGTATTTCCAGACCCCTGCCTGCA	0	0	0	0	0	0.423785	0	0	0	0	3
1188	AAAATAGAGCGTATTTCCAGACCCCTGTGCGTCACCGCTGGCACA	0	0	0	0	0	0.00115344	0	0	0	0	3
1192	AAAATAGAGCGTATTTCCAGACTGTACTGCACTGCAGGTGCAGTACAAGGCTCTGCCCTGGCTCATGTTGGCACA	0	0	0	0	0	0.000288361	0	0	0	0	3
1210	AAAATAGAGCGTATTTCCAGCCCCCTGCCTGCAGGTGCAGTACAAGGTTCTACCCTGGCTCATGTTGGCACA	0	0	0	0	0	0.000151769	0	0	0	0	3
1215	AAAATAGAGCGTATTTCCAGCCCCCTGTCCTTCTTGGCTGCTGGCACA	0	0	0	0	0	0.271075	0	0	0	0	3
1245	AAAATAGAGCGTATTTCCAGGATTCCCTTGGCTGCTGGCACA	0	0	0	0	0	0.00230689	0	0	0	0	3
1248	AAAATAGAGCGTATTTCCAGGCTGTACTGCACTGCA	0	0	0	0	0	0.00113827	0	0	0	0	3
1250	AAAATAGAGCGTATTTCCAGGGTCCGGCGCTAAGCTGCTGGCACA	0	0	0	0	0	0.000151769	0	0	0	0	3
1303	AAAATAGAGCGTATTTGCCTCATCTTGGCTGCTGGCACA	0	0	0	0	0	0.0593417	0	0	0	0	3
1332	AAAATAGGGCGTATTTCCAGAATTTGTCGCATCACCGCTGGCACA	0	0	0	0	0	0.00154804	0	0	0	0	3
1333	AAAATAGGGCGTATTTCCAGACTGTACTGCACTGCA	0	0	0	0	0	0.00160875	0	0	0	0	3
1340	AAAATATAGCGTTTCTGCACTAACCCCTGTGGGGCTGCTGGCACA	0	0	0	0	0	0.000227654	0	0	0	0	3
1357	AAAATGCAGAGCCTGTTGGTCCCGGTCACTGCA	0	0	0	0	0	0.00153287	0	0	0	0	3
1367	AAAATGCTGAGCCCCTCCCTGTCCCGGATTTGCACTGCA	0	0	0	0	0	0.0247535	0	0	0	0	3
1395	AAAATGCTGAGCCTGGTGTTGTCCCGACGCACTGCA	0	0	0	0	0	0.0542574	0	0	0	0	3
1400	AAAATGCTGAGCCTGGTTGCCCCCCCCTGCACTGCA	0	0	0	0	0	0.0404616	0	0	0	0	3
1408	AAAATGCTGAGCCTGGTTGCCTGCACTGCGGGTGCA	0	0	0	0	0	0.00388529	0	0	0	0	3
1423	AAAATGCTGAGCCTGGTTGTTATAACCCTGAGGACTGCA	0	0	0	0	0	0.0350131	0	0	0	0	3
1429	AAAATGCTGAGCCTGGTTGTTATATCCCTCTTGGCTGCTGGCACA	0	0	0	0	0	0.000121415	0	0	0	0	3
1430	AAAATGCTGAGCCTGGTTGTTATATGGATCTGCACTGCA	0	0	0	0	0	0.052588	0	0	0	0	3
1446	AAAATGCTGAGCCTGGTTGTTATTGTCCTCACTGCA	0	0	0	0	0	0.329885	0	0	0	0	3
1461	AAAATGCTGAGCCTGGTTTGTCCCGGAAGCACTGCA	0	0	0	0	0	0.0624833	0	0	0	0	3
1469	AAAATGCTGGGCCTGTTGTCCTGCACTGCA	0	0	0	0	0	0.00239795	0	0	0	0	3
1476	AAAATGGAGCGTATTTCCAGCCCCGACTGCACTGCA	0	0	0	0	0	0.00198817	0	0	0	0	3
1541	AAAGAGGACTTCTGTGCCGCCCCCTGCACTGCA	0	0	0	0	0	0.00156322	0	0	0	0	3
1552	AAAGAGGACTTCTGTGTCCCCTGTCCCGGTTTGGCTGCTGGCACA	0	0	0	0	0	0.00174534	0	0	0	0	3
1559	AAAGAGGACTTCTGTGTGCCCTGTCCCAGCACTGCA	0	0	0	0	0	0.000273184	0	0	0	0	3
1570	AAAGAGGACTTCTGTGTTCTTGACTTGGCTGCTGGCACA	0	0	0	0	0	0.00591899	0	0	0	0	3
1571	AAAGAGGACTTCTGTGTTGCCCTCTTGGCTGCTGGCACA	0	0	0	0	0	0.00176052	0	0	0	0	3
1579	AAAGAGGACTTCTGTGTTTGATGTCCCGAGACTGCA	0	0	0	0	0	0.00122933	0	0	0	0	3
1586	AAAGAGGACTTCTGTGTTTGCCCTGTCTGCACTGCA	0	0	0	0	0	0.000546369	0	0	0	0	3
1597	AAAGAGGACTTCTGTGTTTGTTGTCCCGCAGGCACA	0	0	0	0	0	0.00063743	0	0	0	0	3
1612	AAAGCACTGGGTGTCTTGGTTGACCCCCCCACTGCA	0	0	0	0	0	0.00318715	0	0	0	0	3
1637	AAAGGAACCAGGCTCACAGTTGTAGAGGATCTGAGAAATGTGACTCCACCCAGGAGGGCTGCTGGCACA	0	0	0	0	0	0.000166946	0	0	0	0	3
1642	AAAGGAGACTCCTGTGCTCCCTCTGCTGGCACA	0	0	0	0	0	0.000485661	0	0	0	0	3
1652	AAAGGAGACTTCTGTGAGTGTCCCTGCACTGCA	0	0	0	0	0	0.00279255	0	0	0	0	3
1682	AAAGGAGACTTCTGTTTTTGTCGTTTGGCTGCTGGCACA	0	0	0	0	0	0.00113827	0	0	0	0	3
1690	AAAGGCCAGTCCCGGGGCACTGCA	0	0	0	0	0	0.104599	0	0	0	0	3
1732	AAAGTACAAGGTGCTCCTCTCCCGGGCACTGCA	0	0	0	0	0	0.0033541	0	0	0	0	3
1750	AAAGTACAAGGTGTCAAACCCCCGATCTGCACTGCA	0	0	0	0	0	0.194705	0	0	0	0	3
1762	AAAGTACAAGGTGTCCCCCCTGTCTGCACTGCGGGTGCA	0	0	0	0	0	0.000698138	0	0	0	0	3
1763	AAAGTACAAGGTGTCCCCCCTGTCTTGGCTGCTGGCACA	0	0	0	0	0	7.58845e-05	0	0	0	0	3
1764	AAAGTACAAGGTGTCCCCCTGAACACTGCA	0	0	0	0	0	0.0556082	0	0	0	0	3
1769	AAAGTACAAGGTGTCCTTTCCCCCTGTCGAGCTGGCACA	0	0	0	0	0	0.0191381	0	0	0	0	3
1784	AAAGTACAAGGTGTCTTGACTACCCAAATCACTGCTGGCACA	0	0	0	0	0	0.0026256	0	0	0	0	3
1801	AAAGTACAAGGTGTTATCGCCCCCCCAGAGATCTGCACTGCA	0	0	0	0	0	0.060055	0	0	0	0	3
1830	AAAGTACAAGGTGTTCTCACCCTGTCGACTGCTGGCACA	0	0	0	0	0	0.000774022	0	0	0	0	3
1837	AAAGTACAAGGTGTTCTGACCACCCCCCGCATCACCGCCGGCACA	0	0	0	0	0	0.000106238	0	0	0	0	3
1851	AAAGTACAAGGTGTTGGTACTTTGACTTCCCCGGCTGGCACA	0	0	0	0	0	0.000121415	0	0	0	0	3
1866	AAAGTACAAGGTGTTTCCCCCCGGATTTTGGCCGCTGGCACA	0	0	0	0	0	0.000151769	0	0	0	0	3
1867	AAAGTACAAGGTGTTTCCCCCCTCAACTTGGCTGCTGGCACA	0	0	0	0	0	0.112097	0	0	0	0	3
1876	AAAGTACAAGGTGTTTCGACTAGAAGCACTGCA	0	0	0	0	0	0.00198817	0	0	0	0	3
1890	AAAGTACAAGGTGTTTGAGTCCCTGCTGGCACA	0	0	0	0	0	0.026939	0	0	0	0	3
1910	AAAGTACAAGGTGTTTTCCCAGTCTGCACTGCGGGTGCA	0	0	0	0	0	0.00593417	0	0	0	0	3
1913	AAAGTACAAGGTGTTTTCCCCAGTCCCGCTGCTAGCACA	0	0	0	0	0	0.000151769	0	0	0	0	3
1919	AAAGTACAAGGTGTTTTCCCCCAGTGCTGCACTGCA	0	0	0	0	0	0.0318563	0	0	0	0	3
1937	AAAGTACAAGGTGTTTTCCTGTCCCGGGGCACTGCA	0	0	0	0	0	0.146882	0	0	0	0	3
1938	AAAGTACAAGGTGTTTTCCTTCCCCCTGACTGCACTACA	0	0	0	0	0	0.0028229	0	0	0	0	3
1966	AAAGTACAAGGTGTTTTGAATCCCGACACCGCTGGCACA	0	0	0	0	0	0.000182123	0	0	0	0	3
1980	AAAGTACAAGGTGTTTTGACCACTATCTGCACTGCA	0	0	0	0	0	0.171347	0	0	0	0	3
1984	AAAGTACAAGGTGTTTTGACCAGTCCCGATCCTAGCACCACA	0	0	0	0	0	0.000273184	0	0	0	0	3
1992	AAAGTACAAGGTGTTTTGACCCAGTCCCGAGCTGCTGGCACA	0	0	0	0	0	0.000516015	0	0	0	0	3
2012	AAAGTACAAGGTGTTTTGACCCCCCTCTGCGCTGCA	0	0	0	0	0	0.00165428	0	0	0	0	3
2036	AAAGTACAAGGTGTTTTGACCCTGTGCATCACCGCTGGCACA	0	0	0	0	0	0.179907	0	0	0	0	3
2038	AAAGTACAAGGTGTTTTGACCGCCCCCTGTATCACTGCCGGCACA	0	0	0	0	0	0.000971322	0	0	0	0	3
2049	AAAGTACAAGGTGTTTTGACCTTTCCCCCTCCTGCTGGCACA	0	0	0	0	0	0.0190167	0	0	0	0	3
2057	AAAGTACAAGGTGTTTTGACGGTCCCAGTCACCGCTGGCACA	0	0	0	0	0	0.000576722	0	0	0	0	3
2103	AAAGTACAAGGTGTTTTGACTACCCTCCCCTCTAGCACA	0	0	0	0	0	0.0290941	0	0	0	0	3
2108	AAAGTACAAGGTGTTTTGACTACCTCCAGCCCTATCACCGCTGGCACA	0	0	0	0	0	0.000424953	0	0	0	0	3
2118	AAAGTACAAGGTGTTTTGACTAGAAGCACCGCA	0	0	0	0	0	0.000940968	0	0	0	0	3
2119	AAAGTACAAGGTGTTTTGACTAGAAGCACTGCAGGTGCAGTACAAGGTTCTGCCCTGGCTCATGTTGGAAATTGTATCTTGGCTGCTGGCACA	0	0	0	0	0	0.000242831	0	0	0	0	3
2121	AAAGTACAAGGTGTTTTGACTAGACCCCCAGACCTCACCGCTGGCACA	0	0	0	0	0	0.278117	0	0	0	0	3
2124	AAAGTACAAGGTGTTTTGACTAGACCCCCCTGCCCCTCCACTGCA	0	0	0	0	0	0.00365763	0	0	0	0	3
2136	AAAGTACAAGGTGTTTTGACTAGCCCCCACCCCTGCACA	0	0	0	0	0	0.00253454	0	0	0	0	3
2180	AAAGTACAAGGTGTTTTGACTATCCCTAAAACTGCTAGCACA	0	0	0	0	0	0.0366674	0	0	0	0	3
2181	AAAGTACAAGGTGTTTTGACTATCCCTGGGACTGCA	0	0	0	0	0	0.000106238	0	0	0	0	3
2195	AAAGTACAAGGTGTTTTGACTATTGTCTAAGCTGCTGGCACA	0	0	0	0	0	0.000880261	0	0	0	0	3
2206	AAAGTACAAGGTGTTTTGACTCCCCCAGTCCCCCGCACTGCA	0	0	0	0	0	0.00368799	0	0	0	0	3
2207	AAAGTACAAGGTGTTTTGACTCCCCCAGTCCCCTGCACTGCAGGTGCAGTACAAGGTTCTGCCCTGGCTCATGTTGGCACA	0	0	0	0	0	0.000273184	0	0	0	0	3
2236	AAAGTACAAGGTGTTTTGACTGCCCCCACCACTGCTGGCACA	0	0	0	0	0	0.0772808	0	0	0	0	3
2245	AAAGTACAAGGTGTTTTGACTGGAAGCACTGCA	0	0	0	0	0	0.000409776	0	0	0	0	3
2259	AAAGTACAAGGTGTTTTGACTTCCCCCTATTTGGCTGCTGGCACA	0	0	0	0	0	0.0597363	0	0	0	0	3
2262	AAAGTACAAGGTGTTTTGACTTCCGTCTTGGCTGCTGGCACA	0	0	0	0	0	0.158174	0	0	0	0	3
2274	AAAGTACAAGGTGTTTTGAGAACCCCCCCAGTCGGGGCTGCTGGCACA	0	0	0	0	0	0.0925791	0	0	0	0	3
2278	AAAGTACAAGGTGTTTTGAGCCCCCACTGCACTGCA	0	0	0	0	0	0.278102	0	0	0	0	3
2329	AAAGTACAAGGTGTTTTGCCGCCCCCCCACTGCACTGCAGGTGCAGTACAAGGTTCTGCCCTGGCTGCTGGCACA	0	0	0	0	0	0.000500838	0	0	0	0	3
2332	AAAGTACAAGGTGTTTTGCCTCCCCAGTATGCTCCAGGCACA	0	0	0	0	0	0.000136592	0	0	0	0	3
2334	AAAGTACAAGGTGTTTTGCCTCCCCCCTGCACTGCA	0	0	0	0	0	1.34396	0	0	0	0	3
2335	AAAGTACAAGGTGTTTTGCCTCCCCCCTGCACTGCAGGTGCAGTACAAGGTTCTGCCCTGGCTCATGTTGGCCACTTGCAGCCTCAGCTCCGTATCACCGCTGGCACA	0	0	0	0	0	0.000151769	0	0	0	0	3
2336	AAAGTACAAGGTGTTTTGCCTCGCCCCCCCAGTCCCCTGGCTGCTGACACA	0	0	0	0	0	0.0015784	0	0	0	0	3
2343	AAAGTACAAGGTGTTTTGCGTCGCCCCCCAGCTAGCACCACA	0	0	0	0	0	0.000273184	0	0	0	0	3
2354	AAAGTACAAGGTGTTTTGGAGACTTTCTGTCTCACTGCA	0	0	0	0	0	0.0570196	0	0	0	0	3
2399	AAAGTACAAGGTGTTTTGTCTTCCTCCTGTCCCGCTGGCACA	0	0	0	0	0	0.0181516	0	0	0	0	3
2405	AAAGTACAAGGTGTTTTGTTTCTGTACTTGGCTGCTGGCACA	0	0	0	0	0	0.0153742	0	0	0	0	3
2425	AAAGTACAAGGTGTTTTTTCCTCTCCCCTGACTGCTAGCACA	0	0	0	0	0	0.000682961	0	0	0	0	3
2436	AAAGTACAAGGTTGCATCACA	0	0	0	0	0	0.000106238	0	0	0	0	3
2450	AAAGTACAGCGTTTCTGCACTAGTTTTTGTCCCCCCACTGCTGGCACA	0	0	0	0	0	0.0032175	0	0	0	0	3
2455	AAAGTACAGCGTTTCTGCACTCCCCCTGCCTTCTTGGCTGCTGGCACA	0	0	0	0	0	0.0031568	0	0	0	0	3
2480	AAAGTACAGGGTGTTTTTCCCCCCAGCACTGCA	0	0	0	0	0	0.00229171	0	0	0	0	3
2486	AAAGTACCGGGTGTCGTCTGCACTGCA	0	0	0	0	0	0.000910614	0	0	0	0	3
2503	AAAGTACGAGGTGTTCCCCAGTCCACCGCTGGCACA	0	0	0	0	0	0.00173017	0	0	0	0	3
2515	AAAGTACGAGGTGTTTTGACCCCCTGTCCCGGCTGCACTGCA	0	0	0	0	0	0.0041433	0	0	0	0	3
2527	AAAGTACGAGGTGTTTTGACTCGCCCCCCAGTCACCGCCGGCACA	0	0	0	0	0	0.000182123	0	0	0	0	3
2531	AAAGTACGAGGTGTTTTGAGCCCCCAGTTTGCTCCAGGCACA	0	0	0	0	0	0.000121415	0	0	0	0	3
2538	AAAGTACGGCGTTTCTGCACCCACCCCCTGTCCCGGGCTGCTGGCACA	0	0	0	0	0	0.000910614	0	0	0	0	3
2555	AAAGTACTGGGCCCCTCCCCCCAGTCCACTGCA	0	0	0	0	0	0.0708003	0	0	0	0	3
2557	AAAGTACTGGGCGTCTCCCTCCCCCCCAACTTGGCTGCTGGCACA	0	0	0	0	0	0.0032175	0	0	0	0	3
2603	AAAGTACTGGGTGCCTTCCCTTCCTGCACTGCA	0	0	0	0	0	0.0850362	0	0	0	0	3
2622	AAAGTACTGGGTGTACCGGCCCCCTGTCGAGCTGCTGGCACA	0	0	0	0	0	9.10614e-05	0	0	0	0	3
2637	AAAGTACTGGGTGTCACCCCCAGTCCCTTGGCTGCTGGCACA	0	0	0	0	0	0.000303538	0	0	0	0	3
2641	AAAGTACTGGGTGTCACGCGCCCTCCCGGTCCCGGCCCTGCTGGCACA	0	0	0	0	0	9.10614e-05	0	0	0	0	3
2642	AAAGTACTGGGTGTCACTCGCGCCCCCCACTTGGCTGCTGGCACA	0	0	0	0	0	0.0408107	0	0	0	0	3
2643	AAAGTACTGGGTGTCACTTCCCCTGTCCGTGCTGCTGGCACA	0	0	0	0	0	0.00044013	0	0	0	0	3
2651	AAAGTACTGGGTGTCCACCCCTGTCCCGGCTGCACTGCA	0	0	0	0	0	0.120656	0	0	0	0	3
2658	AAAGTACTGGGTGTCCCAAGCACCGCA	0	0	0	0	0	0.00182123	0	0	0	0	3
2659	AAAGTACTGGGTGTCCCAAGCACTGCAGGTGCAGTACAAGGTTCTGCCCTGGCTCATGTTGGCCGCTTGCAGCCCCAGTTTGCTCCAGGCACA	0	0	0	0	0	0.000166946	0	0	0	0	3
2666	AAAGTACTGGGTGTCCCCCAGTCCCTTAGCACCACA	0	0	0	0	0	0.000318715	0	0	0	0	3
2680	AAAGTACTGGGTGTCCCCCCCCCTCCGATCTGCACTGCA	0	0	0	0	0	0.051647	0	0	0	0	3
2688	AAAGTACTGGGTGTCCCCCGGCCCCCCAGCACTGCA	0	0	0	0	0	0.0485813	0	0	0	0	3
2691	AAAGTACTGGGTGTCCCCCTGCCCGTCTGCACTGCA	0	0	0	0	0	9.10614e-05	0	0	0	0	3
2698	AAAGTACTGGGTGTCCCCCTTGTCCAGATCTGCACTGCA	0	0	0	0	0	0.0586436	0	0	0	0	3
2724	AAAGTACTGGGTGTCCCGCCCTGAGAAACTGCTGGCACA	0	0	0	0	0	0.000455307	0	0	0	0	3
2736	AAAGTACTGGGTGTCCCTGTCCGCTGCACTGCGGGTGCA	0	0	0	0	0	0.00356657	0	0	0	0	3
2744	AAAGTACTGGGTGTCCGCCCCCCCCAGATCTGCACTGCGGGTGCA	0	0	0	0	0	0.0025649	0	0	0	0	3
2752	AAAGTACTGGGTGTCCTCCGATAAGCTGCTGGCACA	0	0	0	0	0	9.10614e-05	0	0	0	0	3
2765	AAAGTACTGGGTGTCCTGATGTCCCGGTGGACTGCTGGCACA	0	0	0	0	0	0.00115344	0	0	0	0	3
2775	AAAGTACTGGGTGTCGACCTGGAAATCTTGGCCGCTGGCACA	0	0	0	0	0	0.000789199	0	0	0	0	3
2815	AAAGTACTGGGTGTCTCCCCTGTCCTTATCTTGGCTGCTGGCACA	0	0	0	0	0	0.173548	0	0	0	0	3
2821	AAAGTACTGGGTGTCTCCCGCGCCCCCCCAGTCCCCTGCACTGCA	0	0	0	0	0	0.0542271	0	0	0	0	3
2826	AAAGTACTGGGTGTCTCCCTGTCCCACATCACCGCTGGCACA	0	0	0	0	0	0.0388529	0	0	0	0	3
2833	AAAGTACTGGGTGTCTCCTCCCCTGTGATCTGCACTGCA	0	0	0	0	0	0.118167	0	0	0	0	3
2835	AAAGTACTGGGTGTCTCCTCCCTGGAGATCTTGGCTGCTGGCACA	0	0	0	0	0	0.076264	0	0	0	0	3
2848	AAAGTACTGGGTGTCTCGCGCCCCCCCAGTCCGGCTGCTGGCACA	0	0	0	0	0	0.031659	0	0	0	0	3
2859	AAAGTACTGGGTGTCTCGGTTGTCCCGGGAACTGCTGGCACA	0	0	0	0	0	0.00125968	0	0	0	0	3
2870	AAAGTACTGGGTGTCTCTCTGTCCCTTTTGGCTGCTGGCACA	0	0	0	0	0	0.000212477	0	0	0	0	3
2878	AAAGTACTGGGTGTCTGCCCCTGTCCCTGAACTGCTAGCACA	0	0	0	0	0	0.0312493	0	0	0	0	3
2894	AAAGTACTGGGTGTCTTCACCCCCAGTCCCGGGACCACTGCA	0	0	0	0	0	0.0581731	0	0	0	0	3
2907	AAAGTACTGGGTGTCTTCCCCCAGTCCCTCGCTGCTTGTACA	0	0	0	0	0	0.000273184	0	0	0	0	3
2910	AAAGTACTGGGTGTCTTCCCCCCAGTCCGACTGCAGGTGCAGTACAAGGTTCTGCCCTGGCTCATGTTGGCCACTTGCACA	0	0	0	0	0	0.000242831	0	0	0	0	3
2941	AAAGTACTGGGTGTCTTCCGCGCCCCCCCAGTCTGAGGGGCTGCA	0	0	0	0	0	0.000258007	0	0	0	0	3
2943	AAAGTACTGGGTGTCTTCCTCCCTGTCATCACTGCA	0	0	0	0	0	0.000379423	0	0	0	0	3
2954	AAAGTACTGGGTGTCTTCGGCCCCCCCAGTCCCTCCGCTGGCACA	0	0	0	0	0	0.0199576	0	0	0	0	3
2959	AAAGTACTGGGTGTCTTCTCCCTGCCGGGCTTGGCTGCTGGCACA	0	0	0	0	0	0.0438916	0	0	0	0	3
2971	AAAGTACTGGGTGTCTTGACCCCAGGGATCTGCACTGCA	0	0	0	0	0	0.0737901	0	0	0	0	3
2988	AAAGTACTGGGTGTCTTGAGGTGTCCCCTCTTGGCTGCTGGCGCA	0	0	0	0	0	0.000804376	0	0	0	0	3
3001	AAAGTACTGGGTGTCTTGCAGGACTTGGCCGCTGGCACA	0	0	0	0	0	0.000804376	0	0	0	0	3
3011	AAAGTACTGGGTGTCTTGCCCAGTCCGGCTCCAGGCACA	0	0	0	0	0	0.108469	0	0	0	0	3
3024	AAAGTACTGGGTGTCTTGCCCCCCAGTCAGACTGCTGGTACA	0	0	0	0	0	0.000576722	0	0	0	0	3
3033	AAAGTACTGGGTGTCTTGCCCCCCCAGTTTGCTCCAGGCACA	0	0	0	0	0	6.07519	0	0	0.0932061	0	3
3058	AAAGTACTGGGTGTCTTGCCGGGCGCCCCCCCGGTCCCGGGCACTGCA	0	0	0	0	0	0.00994087	0	0	0	0	3
3070	AAAGTACTGGGTGTCTTGCTCATCACTGCTGGCACA	0	0	0	0	0	0.0837917	0	0	0	0	3
3084	AAAGTACTGGGTGTCTTGGAAGAACCCCCCAGTTCTGCTGGCACA	0	0	0	0	0	0.000258007	0	0	0	0	3
3087	AAAGTACTGGGTGTCTTGGACAGTCCGGGAACTGCA	0	0	0	0	0	0.0279862	0	0	0	0	3
3089	AAAGTACTGGGTGTCTTGGACCCAGTCTTGGCTGCTGGCACA	0	0	0	0	0	0.183959	0	0	0	0	3
3155	AAAGTACTGGGTGTCTTGGCCCCCAGTCTCTGCACTGCA	0	0	0	0	0	0.544745	0	0	0	0	3
3184	AAAGTACTGGGTGTCTTGGCCCTCGCCCCCCCAGTCTAGACTGCA	0	0	0	0	0	0.000591899	0	0	0	0	3
3208	AAAGTACTGGGTGTCTTGGCGCCCCCCAGCTTGGCTGCCGGCACA	0	0	0	0	0	0.00393082	0	0	0	0	3
3227	AAAGTACTGGGTGTCTTGGCTGTCCAGATCACTGCA	0	0	0	0	0	0.000561546	0	0	0	0	3
3234	AAAGTACTGGGTGTCTTGGGACCCTGTCCCCGCACTGCA	0	0	0	0	0	0.138869	0	0	0	0	3
3247	AAAGTACTGGGTGTCTTGGGCCCCTCTGAAACTGCTGGCACA	0	0	0	0	0	0.00182123	0	0	0	0	3
3252	AAAGTACTGGGTGTCTTGGGGCCAGCCTGCACTGCA	0	0	0	0	0	0.0652455	0	0	0	0	3
3253	AAAGTACTGGGTGTCTTGGGGCCAGCCTGCACTGCAGGTGCAGTACAAGGTTCTGCCCTGGCTCATGTTGGCACA	0	0	0	0	0	0.000136592	0	0	0	0	3
3260	AAAGTACTGGGTGTCTTGGGTCCCCCCAGCTAGACTCCAGGCACA	0	0	0	0	0	0.341556	0	0	0	0	3
3271	AAAGTACTGGGTGTCTTGGTACCCAGCACTACA	0	0	0	0	0	0.0021703	0	0	0	0	3
3282	AAAGTACTGGGTGTCTTGGTCAGGCCCCCAGTCCCGGCTCCAGGCGCA	0	0	0	0	0	0.00292914	0	0	0	0	3
3285	AAAGTACTGGGTGTCTTGGTCCACTTGGCTGCTGGCACA	0	0	0	0	0	0.471395	0	0	0	0	3
3287	AAAGTACTGGGTGTCTTGGTCCCAGGCACTGCGGGTGCA	0	0	0	0	0	0.00620735	0	0	0	0	3
3323	AAAGTACTGGGTGTCTTGGTCCTTCCCCTGTCCGCTGGCACA	0	0	0	0	0	0.0869333	0	0	0	0	3
3332	AAAGTACTGGGTGTCTTGGTCGGCCCCCCCACCTAAGCTGCTGGCACA	0	0	0	0	0	0.000849907	0	0	0	0	3
3338	AAAGTACTGGGTGTCTTGGTCTATGTTGCTGCTGGCACA	0	0	0	0	0	0.0433756	0	0	0	0	3
3351	AAAGTACTGGGTGTCTTGGTGGCCATCTCTAGAACTACA	0	0	0	0	0	0.0427382	0	0	0	0	3
3359	AAAGTACTGGGTGTCTTGGTTAAAATCTTGGCTGCTGGCACA	0	0	0	0	0	0.0364398	0	0	0	0	3
3368	AAAGTACTGGGTGTCTTGGTTAAATGCAAAACTGCTGGCACA	0	0	0	0	0	0.000409776	0	0	0	0	3
3374	AAAGTACTGGGTGTCTTGGTTAACCCCATCTTGGCTGTTGGCACA	0	0	0	0	0	0.00106238	0	0	0	0	3
3380	AAAGTACTGGGTGTCTTGGTTAACCCCCAGTGGGTCACTGCCGGCACA	0	0	0	0	0	0.000895437	0	0	0	0	3
3412	AAAGTACTGGGTGTCTTGGTTAAGTCCCAGGCCCGGGCTGCTGGCACA	0	0	0	0	0	0.120383	0	0	0	0	3
3416	AAAGTACTGGGTGTCTTGGTTAATCCCCAGCCTAGCACCACA	0	0	0	0	0	0.000151769	0	0	0	0	3
3420	AAAGTACTGGGTGTCTTGGTTAATCCTTTGGCTGCTGGCGCA	0	0	0	0	0	0.00238277	0	0	0	0	3
3440	AAAGTACTGGGTGTCTTGGTTACCCCCCAGTCCCGGGCTGCA	0	0	0	0	0	0.00520568	0	0	0	0	3
3462	AAAGTACTGGGTGTCTTGGTTAGATTGGTTGCTGGCACA	0	0	0	0	0	0.000804376	0	0	0	0	3
3467	AAAGTACTGGGTGTCTTGGTTAGCTCCCAGAGTCCAGGCACA	0	0	0	0	0	0.0659133	0	0	0	0	3
3471	AAAGTACTGGGTGTCTTGGTTAGTCCTGAAGCTGCTGGCACA	0	0	0	0	0	0.00132039	0	0	0	0	3
3485	AAAGTACTGGGTGTCTTGGTTATCCCCCCACCCGCTGGCACA	0	0	0	0	0	0.0349524	0	0	0	0	3
3489	AAAGTACTGGGTGTCTTGGTTATCCCCCTGGGCTGCACTGCAGGTGCAGTACAAGGTTCTGCCCTGCAGTGCAGGGACAGAAACGCTGTATTTTGGCTCAGGGCTGCTGGCACA	0	0	0	0	0	0.000242831	0	0	0	0	3
3498	AAAGTACTGGGTGTCTTGGTTATTCCCAGTCCCTTCTGCGCTGCA	0	0	0	0	0	0.00241313	0	0	0	0	3
3507	AAAGTACTGGGTGTCTTGGTTCCCCATATCTTGGCTGCA	0	0	0	0	0	0.000273184	0	0	0	0	3
3531	AAAGTACTGGGTGTCTTGGTTCTGTGCGCTGGCGCA	0	0	0	0	0	0.00107756	0	0	0	0	3
3532	AAAGTACTGGGTGTCTTGGTTGACCCCCACATCACTACTGGCACA	0	0	0	0	0	0.000349069	0	0	0	0	3
3537	AAAGTACTGGGTGTCTTGGTTGGGTCCCCCACTGCA	0	0	0	0	0	0.0624985	0	0	0	0	3
3538	AAAGTACTGGGTGTCTTGGTTGGGTCCCCCACTGCAGGTGCAGTACAAGGTTCTGCCCTGGCTCATGTTGGCCACTTGGCTGCTGGCACA	0	0	0	0	0	0.000136592	0	0	0	0	3
3544	AAAGTACTGGGTGTCTTGGTTGTCCTCCCTAGCACCACA	0	0	0	0	0	0.000166946	0	0	0	0	3
3589	AAAGTACTGGGTGTCTTGTTGTCCCGGAGCACTGCA	0	0	0	0	0	0.205526	0	0	0	0	3
3594	AAAGTACTGGGTGTCTTGTTTTTGGCTGCTGGCACAAAAATAGACAGCTGAGTCTTCTGGATCCACGGCACA	0	0	0	0	0	0.000516015	0	0	0	0	3
3602	AAAGTACTGGGTGTCTTTCCCCCAGTTGTCTCGGCTGCTGGCACA	0	0	0	0	0	0.00163911	0	0	0	0	3
3617	AAAGTACTGGGTGTCTTTGCCCCCTGTGGGCCTGCTGGCACA	0	0	0	0	0	0.00179087	0	0	0	0	3
3632	AAAGTACTGGGTGTTCACGGCCCCCCCCTCATCTGCACTGCA	0	0	0	0	0	0.169223	0	0	0	0	3
3633	AAAGTACTGGGTGTTCACGGCCCCCCCCTCATCTGCACTGCAGGTGCAGTACAAGGTTCTGCCCTGGCTCATGTTGGCCACTTGGCTGCTGGCACA	0	0	0	0	0	0.000166946	0	0	0	0	3
3636	AAAGTACTGGGTGTTCGCCCCCTGTCCCTCTTGGCTGCTGGCACA	0	0	0	0	0	0.0001973	0	0	0	0	3
3637	AAAGTACTGGGTGTTCGCCCCCTGTCCTTGGCTGCTGGCACA	0	0	0	0	0	0.0347703	0	0	0	0	3
3680	AAAGTAGAGCTGCCCGCCGCCCCCCCAGTCAGCACTGCGGGTGCA	0	0	0	0	0	0.00294432	0	0	0	0	3
3692	AAAGTAGAGCTGCCCGGCCGCGCCCCCCCAGTGGAAGCTGCTGGCACA	0	0	0	0	0	0.000288361	0	0	0	0	3
3714	AAAGTAGAGCTGCCCGGTCCCCCAGTCTGGAGCACTGCA	0	0	0	0	0	0.0655946	0	0	0	0	3
3719	AAAGTAGAGCTGCCCGGTCCCTGTCCAAGGATCTTGGCTGCTGGCACA	0	0	0	0	0	0.022993	0	0	0	0	3
3729	AAAGTAGAGCTGCCCGGTGAACCCCAGATCACCGCTGGCACA	0	0	0	0	0	0.0922908	0	0	0	0	3
3735	AAAGTAGAGCTGCCCGGTGCCAGCGCCCCCCCAGTCGTCTGCACTGCA	0	0	0	0	0	0.470955	0	0	0	0	3
3738	AAAGTAGAGCTGCCCGGTGCCCAGCTCTGCACTGCAGGTGCGGTACAAGGTTCTGCCCTGGAGAGGAACACCTTGTACTTTGGTGCGGGCACCAAAGTACAAGGTTGCATCACCGCTGGCACA	0	0	0	0	0	0.000288361	0	0	0	0	3
3739	AAAGTAGAGCTGCCCGGTGCCCAGCTCTGCGCTGCA	0	0	0	0	0	0.00124451	0	0	0	0	3
3745	AAAGTAGAGCTGCCCGGTGCCCCCCCCAGGATCTTGGCTGCTGGCACA	0	0	0	0	0	0.071635	0	0	0	0	3
3751	AAAGTAGAGCTGCCCGGTGCCCCCCTCTGCACTGTAGGTGCA	0	0	0	0	0	0.000151769	0	0	0	0	3
3769	AAAGTAGAGCTGCCCGGTGCCGCCCCCTGGGGCACTGCGGGTGCA	0	0	0	0	0	0.0035514	0	0	0	0	3
3772	AAAGTAGAGCTGCCCGGTGCCTATCTCCCCCCTCTCTTGGCTGCTGGCACA	0	0	0	0	0	0.125103	0	0	0	0	3
3796	AAAGTAGAGCTGCCCGGTGCTTTCGTCCCTGCCGGCACA	0	0	0	0	0	7.58845e-05	0	0	0	0	3
3797	AAAGTAGAGCTGCCCGGTGCTTTGTCCCGGTGCACTGCA	0	0	0	0	0	0.0045379	0	0	0	0	3
3805	AAAGTAGAGCTGCCCGGTGGATCCCCGATCTGCACTGCGGGTGCA	0	0	0	0	0	0.00238277	0	0	0	0	3
3841	AAAGTAGAGCTGCCCGGTGTCCCCCAATCCTGCACCGCA	0	0	0	0	0	0.00218547	0	0	0	0	3
3842	AAAGTAGAGCTGCCCGGTGTCCCCCAATCCTGCACTGCAGGTGCAGTACAAGGTTCTGCCCTGGCTGCTGGCACA	0	0	0	0	0	0.000258007	0	0	0	0	3
3855	AAAGTAGAGCTGCCCGGTGTCCCCTGCCCCTTGGTTGCTGGCACA	0	0	0	0	0	0.000166946	0	0	0	0	3
3861	AAAGTAGAGCTGCCCGGTGTCCCTGTCCCGAGAACTACA	0	0	0	0	0	0.185614	0	0	0	0	3
3882	AAAGTAGAGCTGCCCGGTGTCGCCCCCTGTCCCCCCATCACTGCTGGCACA	0	0	0	0	0	0.0264989	0	0	0	0	3
3896	AAAGTAGAGCTGCCCGGTGTCTGTCCCACTGCAGGTGCAGTACAAGGTTCTGCCCTGGCTCATGTTGGCACA	0	0	0	0	0	0.00103203	0	0	0	0	3
3897	AAAGTAGAGCTGCCCGGTGTCTGTTTTTGCACTGCA	0	0	0	0	0	9.10614e-05	0	0	0	0	3
3899	AAAGTAGAGCTGCCCGGTGTCTTGGTTAACCCCCAGTGGGTCACTGCTGGCACA	0	0	0	0	0	7.58845e-05	0	0	0	0	3
3916	AAAGTAGAGCTGCCCGGTGTTACCTCTTCCCTGTTCACCGCTGGCACA	0	0	0	0	0	0.0266506	0	0	0	0	3
3925	AAAGTAGAGCTGCCCGGTGTTCCAGTCCTGGCTGCGGCTGCTGGCACA	0	0	0	0	0	0.000136592	0	0	0	0	3
3929	AAAGTAGAGCTGCCCGGTGTTCCCCAGTCCCTCTGCACTGCA	0	0	0	0	0	0.0963126	0	0	0	0	3
3963	AAAGTAGAGCTGCCCGGTGTTCTGTCTCCCACTGCA	0	0	0	0	0	0.00153287	0	0	0	0	3
3972	AAAGTAGAGCTGCCCGGTGTTTAAACCCCCAGTCCCACTGCA	0	0	0	0	0	0.0903026	0	0	0	0	3
3990	AAAGTAGAGCTGCCCGGTGTTTCCCCAGTCCCCTAGACTCCAGGCACA	0	0	0	0	0	0.158128	0	0	0	0	3
3995	AAAGTAGAGCTGCCCGGTGTTTCCCCTGTAATCTTGGCTGCTGGCACA	0	0	0	0	0	0.193627	0	0	0	0	3
3998	AAAGTAGAGCTGCCCGGTGTTTCCCTGGACACTGCA	0	0	0	0	0	0.0460316	0	0	0	0	3
4014	AAAGTAGAGCTGCCCGGTGTTTGACAATGCATCACCGCTGGCACA	0	0	0	0	0	0.0247839	0	0	0	0	3
4023	AAAGTAGAGCTGCCCGGTGTTTGAGGGTCCACGATCTGCACTGCA	0	0	0	0	0	0.18616	0	0	0	0	3
4024	AAAGTAGAGCTGCCCGGTGTTTGAGTCCCAGTCGTAGCTGCTGGCACA	0	0	0	0	0	0.000121415	0	0	0	0	3
4027	AAAGTAGAGCTGCCCGGTGTTTGATGTCTTTAGACTCCAGGCACA	0	0	0	0	0	0.110852	0	0	0	0	3
4039	AAAGTAGAGCTGCCCGGTGTTTGCCCCCAGTCCCCAGGCACCACA	0	0	0	0	0	0.000242831	0	0	0	0	3
4045	AAAGTAGAGCTGCCCGGTGTTTGCCCCCCCAGGAGGGCTGCTGGCACA	0	0	0	0	0	0.772368	0	0	0	0	3
4063	AAAGTAGAGCTGCCCGGTGTTTGCGTCCCACTCTGCACTGCA	0	0	0	0	0	0.467722	0	0	0	0	3
4064	AAAGTAGAGCTGCCCGGTGTTTGCGTCCCGAGAACTACA	0	0	0	0	0	0.000166946	0	0	0	0	3
4065	AAAGTAGAGCTGCCCGGTGTTTGCTCCAGCCCCAAGATCTTGGCTGCCAGCACA	0	0	0	0	0	0.000485661	0	0	0	0	3
4074	AAAGTAGAGCTGCCCGGTGTTTGCTGGGCTGCTGGCACAAAAATAGACAGCTGAGTCTTCTGGATCCACGGCACA	0	0	0	0	0	0.000242831	0	0	0	0	3
4083	AAAGTAGAGCTGCCCGGTGTTTGCTGTCCCGGTTTGGCTGCTGGCACA	0	0	0	0	0	0.0938692	0	0	0	0	3
4086	AAAGTAGAGCTGCCCGGTGTTTGGCCCCCAGTCGGGGCTGCTGGCACA	0	0	0	0	0	0.0807867	0	0	0	0	3
4099	AAAGTAGAGCTGCCCGGTGTTTGTCCTGTGCGCACTGCA	0	0	0	0	0	0.00109274	0	0	0	0	3
4114	AAAGTAGAGCTGCCCGGTGTTTGTTTCTGCACTGCGGGTGCA	0	0	0	0	0	0.00607076	0	0	0	0	3
4125	AAAGTAGAGCTGCCCGGTGTTTTGCCTCCCCCCTGCACTGCA	0	0	0	0	0	0.000106238	0	0	0	0	3
4133	AAAGTAGAGCTGCCCGGTGTTTTGTTCCGGAGCACTGCA	0	0	0	0	0	0.000121415	0	0	0	0	3
4138	AAAGTAGAGCTGCCCGGTGTTTTTGTGTTGGCTGCA	0	0	0	0	0	0.000166946	0	0	0	0	3
4139	AAAGTAGAGCTGCCCGGTTCCCCCAGTCCCGGCACTGCGGGTGCA	0	0	0	0	0	0.00277737	0	0	0	0	3
4141	AAAGTAGAGCTGCCCGGTTTCCCCGGGATCTTGGCTGCA	0	0	0	0	0	0.00107756	0	0	0	0	3
4157	AAAGTAGAGGGGCGAAACCCACCTGTCCCGGGCACTGCA	0	0	0	0	0	9.10614e-05	0	0	0	0	3
4163	AAAGTAGAGGGGCGAACCGCTCCCCTGTGGCACTGCAGGTGCAGTACAAGGTTCTGCCCTGGCACA	0	0	0	0	0	7.58845e-05	0	0	0	0	3
4172	AAAGTAGAGGGGCGAAGGGCTGCCGGCACA	0	0	0	0	0	0.000242831	0	0	0	0	3
4179	AAAGTAGAGGGGCGAATCATATCTGTCCTCACTGCA	0	0	0	0	0	0.0376084	0	0	0	0	3
4180	AAAGTAGAGGGGCGAATCATATTGGGTACTGCA	0	0	0	0	0	7.58845e-05	0	0	0	0	3
4209	AAAGTAGAGGGGCGAATTACCCCTGTCACTGCTGGCACA	0	0	0	0	0	0.0263926	0	0	0	0	3
4264	AAAGTAGAGGGGCGAATTATACTGTTCTGCACTACA	0	0	0	0	0	0.00487179	0	0	0	0	3
4265	AAAGTAGAGGGGCGAATTATACTGTTCTGCACTGCAGGTGCAGTACAAGGTTCTGCCCTGGCTGCTGGCACA	0	0	0	0	0	0.000212477	0	0	0	0	3
4281	AAAGTAGAGGGGCGAATTATAGCCGTCCGGGCTGCTGGCACA	0	0	0	0	0	0.0431783	0	0	0	0	3
4292	AAAGTAGAGGGGCGAATTATAGGAAAGGGGATCTGCACTGCA	0	0	0	0	0	0.075581	0	0	0	0	3
4310	AAAGTAGAGGGGCGAATTATAGGAACTGTCCCTGCA	0	0	0	0	0	0.329491	0	0	0	0	3
4322	AAAGTAGAGGGGCGAATTATAGGAAGGTCCCCCACCGCTGGCACA	0	0	0	0	0	0.0714377	0	0	0	0	3
4335	AAAGTAGAGGGGCGAATTATAGGAATCTGCACTGCAGGTGCAGTACAAGGTTCTGCACCTGCAGTGCAGGGGGGAGGCAAAACACCTTGTACTTTGACTTCCCCCTATTTGGCTGCTGGCACA	0	0	0	0	0	9.10614e-05	0	0	0	0	3
4336	AAAGTAGAGGGGCGAATTATAGGAATCTGCACTGCGGGTGCA	0	0	0	0	0	0.00399153	0	0	0	0	3
4346	AAAGTAGAGGGGCGAATTATAGGAATTCCTTCCACTGCTGGCACA	0	0	0	0	0	0.00174534	0	0	0	0	3
4361	AAAGTAGAGGGGCGAATTATAGGAGGCTGTCGGGTCACTGCTGGCACA	0	0	0	0	0	0.517123	0	0	0	0	3
4364	AAAGTAGAGGGGCGAATTATAGGATCGTCCCAAGCTGCTGGCACA	0	0	0	0	0	9.10614e-05	0	0	0	0	3
4403	AAAGTAGAGGGGCGAATTATAGTTGTCCCGGGCACTGCA	0	0	0	0	0	0.105904	0	0	0	0	3
4415	AAAGTAGAGGGGCGAATTATATCTGCCCTCACTGCA	0	0	0	0	0	0.000227654	0	0	0	0	3
4419	AAAGTAGAGGGGCGAATTATATTGCGCACTGTAGGTGCA	0	0	0	0	0	0.0116559	0	0	0	0	3
4424	AAAGTAGAGGGGCGAATTATCATCCCCTGCCTCACTGCA	0	0	0	0	0	0.0703146	0	0	0	0	3
4425	AAAGTAGAGGGGCGAATTATCCCCCCTGGGATCTGCACTGCA	0	0	0	0	0	0.0534682	0	0	0	0	3
4451	AAAGTAGAGGGGCGAATTATGCTGCCCAGCACTGCA	0	0	0	0	0	0.560665	0	0	0	0	3
4452	AAAGTAGAGGGGCGAATTATGCTGCCCATCTTGGCTGCTGGCACA	0	0	0	0	0	0.000182123	0	0	0	0	3
4456	AAAGTAGAGGGGCGAATTATGGGAATCTGTCCCGGCATCACCGCTGGCACA	0	0	0	0	0	0.00370317	0	0	0	0	3
4464	AAAGTAGAGGGGCGAATTATTCTGTCCTAGATCTCTACTGCTAGCACA	0	0	0	0	0	0.000166946	0	0	0	0	3
4498	AAAGTAGAGGGGCGAATTCCCCCCGGCTGCACTGCA	0	0	0	0	0	0.00206406	0	0	0	0	3
4512	AAAGTAGAGGGGCGAATTCCCTACCCTGTCGCTATCTGCACTGCA	0	0	0	0	0	0.379241	0	0	0	0	3
4513	AAAGTAGAGGGGCGAATTCCCTACCCTGTCGCTATCTGCACTGCAGGTGCAGTACAAGGTTCTGCCCTGGCTCATGTTGGCCACTTGCAGCCTCAGCTCACCGCTGGCACA	0	0	0	0	0	7.58845e-05	0	0	0	0	3
4517	AAAGTAGAGGGGCGAATTCCCTCCGCGTCGGAGCTCACCGCTGGCACA	0	0	0	0	0	0.0514649	0	0	0	0	3
4575	AAAGTAGAGGGGCGACGCCCCCTCCACTTGGCTGCTGGCACA	0	0	0	0	0	0.0348006	0	0	0	0	3
4587	AAAGTAGAGGGGCGATTCCCACCCTGTCCCTGCACTGCAGGTGCAGTACAAGGTTCTGCCCTGGCTCATGTTGGCCAGGGCAGAACCTTGTACTGCACCTGCAGTGCAGGGACAGGGTGGGAATCGCCCCTCTACTTTGCGGCAGGCACA	0	0	0	0	0	0.000227654	0	0	0	0	3
4610	AAAGTAGAGTTGTCCGGTGTCCCCTGTCCCTTGGCTGCTGGCACA	0	0	0	0	0	0.000166946	0	0	0	0	3
4616	AAAGTAGGGCTGCCCGGTGACCGCCCCCCCTAGACTCCAGGCACA	0	0	0	0	0	0.0030202	0	0	0	0	3
4617	AAAGTAGGGCTGCCCGGTGCCCCCCCCTGCACTGCA	0	0	0	0	0	0.000106238	0	0	0	0	3
4647	AAAGTAGGGGGGCGAATTATAGGAATCCGCATCACTGCTGGCACA	0	0	0	0	0	0.000333892	0	0	0	0	3
4654	AAAGTAGGGGGGCGAATTATAGTTATCTGCGCTGCA	0	0	0	0	0	0.000182123	0	0	0	0	3
4669	AAAGTAGGGGGGCGGATTATATTGGGCACTGCA	0	0	0	0	0	0.000182123	0	0	0	0	3
4679	AAAGTATAGCCGCCCGGTGTTTCCCCTGTCCCTGCTGCTGGCACA	0	0	0	0	0	0.00044013	0	0	0	0	3
4691	AAAGTCCTGGGTGTCTTCCCTGTCCGGACTGCTGGCACA	0	0	0	0	0	0.000470484	0	0	0	0	3
4706	AAAGTGCCCTGAATCACCGCTGGCACA	0	0	0	0	0	0.00112309	0	0	0	0	3
4718	AAAGTGCTGGGTGTCTTGGCCCCCCCAGAGACTCCAGGCACA	0	0	0	0	0	0.00329339	0	0	0	0	3
4724	AAAGTGGAGCTGCCCGGTCCGGCCCACGTCTGCACTGCA	0	0	0	0	0	0.0036121	0	0	0	0	3
4732	AAAGTGGAGCTGCCCGGTGTTTTCGTCCCTGCTGGCACA	0	0	0	0	0	0.00162393	0	0	0	0	3
4738	AAAGTTACTCCCCAGTTTATCTGCACTGCA	0	0	0	0	0	0.000166946	0	0	0	0	3
4773	AAATAATCTCTCGTTTTCTGTCCCTTGGCTGCTGGCACA	0	0	0	0	0	0.000758845	0	0	0	0	3
4789	AAATAATCTTTCGAAGCGCCCCCCGTCCTCTTGGCTGCTGGCACA	0	0	0	0	0	0.00373352	0	0	0	0	3
4800	AAATAATCTTTCGCCCACCCCTGTCTCTGCACTGCA	0	0	0	0	0	0.0509337	0	0	0	0	3
4803	AAATAATCTTTCGCCCCCCTCTCCTCTAGCACA	0	0	0	0	0	0.000576722	0	0	0	0	3
4808	AAATAATCTTTCGCCCCCTGTCCCTTGGCTGCTGGCACA	0	0	0	0	0	0.181516	0	0	0	0	3
4809	AAATAATCTTTCGCCCCCTGTCCTAGCTGCACTGCA	0	0	0	0	0	0.0655035	0	0	0	0	3
4812	AAATAATCTTTCGCCCCTGCCTGCACTGCGGGTGCA	0	0	0	0	0	0.000409776	0	0	0	0	3
4821	AAATAATCTTTCGCCGTCCTCCTTCTGGCTGCTGGCACA	0	0	0	0	0	0.0311885	0	0	0	0	3
4851	AAATAATCTTTCGGGAGCCCTGCCCGCATCACCGCTGGCACA	0	0	0	0	0	0.0188801	0	0	0	0	3
4862	AAATAATCTTTCGTCCCCCGGATCTGCACTGCA	0	0	0	0	0	0.075156	0	0	0	0	3
4866	AAATAATCTTTCGTCCCCTGTCCCGGTCTGGCTGCTGGCACA	0	0	0	0	0	0.0276371	0	0	0	0	3
4883	AAATAATCTTTCGTCGGAAATTTGTCGGCTGCTGGCACA	0	0	0	0	0	0.000424953	0	0	0	0	3
4917	AAATAATCTTTCGTTGAACCCAAAATCTTGGCTGCTGGCACA	0	0	0	0	0	0.031659	0	0	0	0	3
4937	AAATAATCTTTCGTTGATACCCTGTCCCGGGCTGCTGGCACA	0	0	0	0	0	0.277176	0	0	0	0	3
4979	AAATAATCTTTCGTTGGAAAAGCCATCTTGGCTGCTGGCACA	0	0	0	0	0	0.127714	0	0	0	0	3
4984	AAATAATCTTTCGTTGGAAAATCTGTCTGCACTGCA	0	0	0	0	0	0.0531495	0	0	0	0	3
4986	AAATAATCTTTCGTTGGAAAATGTCCCATCACTGCTGGCACA	0	0	0	0	0	0.0397331	0	0	0	0	3
5020	AAATAATCTTTCGTTGGAAACTGTCCCGCGGCTGCTGGCACA	0	0	0	0	0	0.0461833	0	0	0	0	3
5062	AAATAATCTTTCGTTGGAAATGCTGTCCCCTCGGCTGCCGGCACA	0	0	0	0	0	0.000576722	0	0	0	0	3
5067	AAATAATCTTTCGTTGGAAATTCTGGCACTGCAGGTGCAGTACAAGGTTCTGCACCTGCAGGGACA	0	0	0	0	0	0.000136592	0	0	0	0	3
5068	AAATAATCTTTCGTTGGAAATTCTGGCACTGCGGGTGCA	0	0	0	0	0	0.00702691	0	0	0	0	3
5071	AAATAATCTTTCGTTGGAAATTGCAACTGCACTGCA	0	0	0	0	0	0.0820464	0	0	0	0	3
5076	AAATAATCTTTCGTTGGAAATTGGTGGGCTGCTGGCACA	0	0	0	0	0	0.00169981	0	0	0	0	3
5081	AAATAATCTTTCGTTGGAAATTTCGTGTCCCGGTGCACTGCA	0	0	0	0	0	0.3985	0	0	0	0	3
5082	AAATAATCTTTCGTTGGAAATTTCTGTCGTGCTGCTGGCACA	0	0	0	0	0	0.000622253	0	0	0	0	3
5085	AAATAATCTTTCGTTGGAAATTTGGGCACTGCAGGTGCAGTACAAGGTTCTGCCCTGGCTCATGTTGGCACA	0	0	0	0	0	0.000166946	0	0	0	0	3
5086	AAATAATCTTTCGTTGGAAATTTGTCCCCCGCCGCTGGCACA	0	0	0	0	0	0.0514345	0	0	0	0	3
5094	AAATAATCTTTCGTTGGAACCCCTGTGTGCACTGCA	0	0	0	0	0	0.0353622	0	0	0	0	3
5101	AAATAATCTTTCGTTGGAACTGTCCGCTTGGCTGCTGGCACA	0	0	0	0	0	0.046927	0	0	0	0	3
5107	AAATAATCTTTCGTTGGAATAATGAGCATCACCGCTGGCACA	0	0	0	0	0	0.0347399	0	0	0	0	3
5108	AAATAATCTTTCGTTGGAATACTGTCCCTGGCTGCTGGCACA	0	0	0	0	0	0.0833819	0	0	0	0	3
5176	AAATAATCTTTCGTTGGCCCCTGTCTCTGCACTGCA	0	0	0	0	0	0.000106238	0	0	0	0	3
5178	AAATAATCTTTCGTTGGCCCTGCCCCGGCTGCTGGCACA	0	0	0	0	0	0.000546369	0	0	0	0	3
5183	AAATAATCTTTCGTTGGCCCTTGCACTGCAGGTGCAGTACAAGGTTCTGCCCTGGCTGCTGGCACA	0	0	0	0	0	0.000151769	0	0	0	0	3
5184	AAATAATCTTTCGTTGGCCCTTGCACTGTAGGTGCA	0	0	0	0	0	0.000576722	0	0	0	0	3
5194	AAATAATCTTTCGTTGGCGCCCCCTGTCCCTTGGCTGCA	0	0	0	0	0	0.00063743	0	0	0	0	3
5195	AAATAATCTTTCGTTGGCGCCCTGTCCCGCACTGCA	0	0	0	0	0	0.0946584	0	0	0	0	3
5201	AAATAATCTTTCGTTGGGCCCCCCCCGCCTGCA	0	0	0	0	0	0.0462289	0	0	0	0	3
5204	AAATAATCTTTCGTTGGGCCCTGTCTGGCTGCTGGCACA	0	0	0	0	0	0.0611933	0	0	0	0	3
5209	AAATAATCTTTCGTTGGGTCGACTGTCTGCACTGCA	0	0	0	0	0	0.0529522	0	0	0	0	3
5265	AAATAATCTTTCTTTGTAAATAGCCCCATCTGCACTGCA	0	0	0	0	0	0.000121415	0	0	0	0	3
5283	AAATAGTCTTTCGTTGGCCCCTGTCGTTTCTTGGCTGCTGGCACA	0	0	0	0	0	0.000652607	0	0	0	0	3
5316	GAAAAGTAACCTTTCGTTGGAAATTTGGGCACTGCA	0	0	0	0	0	0.000136592	0	0	0	0	3
5320	GAAAAGTAATCTTTCGCCCCTCGCTTGGCTGCTGGCACA	0	0	0	0	0	0.000849907	0	0	0	0	3
5329	GAAAAGTAATCTTTCGTTGGAAAGGTGTTGGCTGCTGGCACA	0	0	0	0	0	0.00100168	0	0	0	0	3
5339	GAAAAGTAATCTTTCGTTGGCCCTTGCACTGCA	0	0	0	0	0	0.00209441	0	0	0	0	3
5346	GAAAAGTAATCTTTCGTTTGAATGTCCCTGGCTGCTGGCACA	0	0	0	0	0	0.000106238	0	0	0	0	3
5353	GAAACATAATCTTTCGCCCCTGCCTGCACTGCA	0	0	0	0	0	0.000318715	0	0	0	0	3
5368	GAAAGATAATCTTTCGTTGGAAATTCTGGCACTGCA	0	0	0	0	0	0.00701173	0	0	0	0	3
5374	GAAAGATAGTCTTTCGTTGGAAATAGCCCCATCTGCACTGCA	0	0	0	0	0	0.000500838	0	0	0	0	3
5378	GAAATACAGCGTTTCTACACCAGTTCCCCAGGGATCTGCACTGCA	0	0	0	0	0	0.000364246	0	0	0	0	3
5385	GAAATACAGCGTTTCTGCACTAGTTGTCCCTTGGCTGCTGGCACA	0	0	0	0	0	0.00417365	0	0	0	0	3
5388	GAAATACAGCGTTTCTGCACTTCGCCCCCTGTGATCTTGGCTGCTGGCACA	0	0	0	0	0	0.0119139	0	0	0	0	3
5394	GAAATACAGCGTTTCTGTCCCCAGTCCCATATCTGCACTGCCGGTGCA	0	0	0	0	0	0.000379423	0	0	0	0	3
5396	GAAATACGGCGTTTCTGCAAGCCCCCAGTCTTGGCTGCTGGCACA	0	0	0	0	0	0.000470484	0	0	0	0	3
5404	GAAATATAGCGTTTCTGCGCCATCCCCTTGGCTGCTGGCACA	0	0	0	0	0	0.000485661	0	0	0	0	3
5434	GAACAGTACTTCGGTCCCGGCACCAGAACTGCTAGCACA	0	0	0	0	0	0.000121415	0	0	0	0	3
5482	GAACGTATTTCCAGAATTCCCACCATCTTGGCTGCTGGCACA	0	0	0	0	0	7.58845e-05	0	0	0	0	3
5487	GAACGTATTTCCAGAATTTTCTGCACTGCA	0	0	0	0	0	0.00227654	0	0	0	0	3
5497	GAACTGCACCCCCCCATTCCTAGCACCACA	0	0	0	0	0	0.000273184	0	0	0	0	3
5520	GAACTGCCCAGCATCCCCCCCCGAATCTCGGCTGCTGGCACA	0	0	0	0	0	0.00182123	0	0	0	0	3
5531	GAACTGCCCGGTGTTCCCAGTCCCTTGGCTGCTGGCACA	0	0	0	0	0	0.00163911	0	0	0	0	3
5544	GAACTGCCCGGTGTTTTTGTCCCGGTCTGCACTGCA	0	0	0	0	0	0.00100168	0	0	0	0	3
5545	GAACTGCCCGGTGTTTTTGTGTTGGCTGCTGGCACA	0	0	0	0	0	0.000349069	0	0	0	0	3
5546	GAACTGCCCGGTTTCCCCGGGATCTTGGCTGCTGGCACA	0	0	0	0	0	0.000333892	0	0	0	0	3
5548	GAACTGCTCAACATAGTAACCCCCCGTCCCATGGCTGCTGGCACA	0	0	0	0	0	0.000258007	0	0	0	0	3
5565	GAACTGCTCAGCAACCCCTGTCCCACTGCA	0	0	0	0	0	0.477299	0	0	0	0	3
5588	GAACTGCTCAGCAAGCCCCCTGTCCAGACTGCTGGCACA	0	0	0	0	0	0.000531192	0	0	0	0	3
5596	GAACTGCTCAGCACAAATACCCCAGTCCCGGCTGCTGGCACA	0	0	0	0	0	0.00294432	0	0	0	0	3
5597	GAACTGCTCAGCACAGTCCCCCGGGGGACTGCA	0	0	0	0	0	0.00778575	0	0	0	0	3
5608	GAACTGCTCAGCACCCCCCCCCCAAACACCTTGGCTGCTGGCACA	0	0	0	0	0	0.0285781	0	0	0	0	3
5621	GAACTGCTCAGCACCCTCCCCTGTCGGGCTGCTGGCACA	0	0	0	0	0	0.0156777	0	0	0	0	3
5628	GAACTGCTCAGCACCTCCTGTCCCTAAATCTGCACTGCGGGTGCA	0	0	0	0	0	0.000546369	0	0	0	0	3
5641	GAACTGCTCAGCACTCCTCCCCAGTCCCGCACTGCA	0	0	0	0	0	0.00285326	0	0	0	0	3
5646	GAACTGCTCAGCAGAGAACCCCCCCAGCCTAGAACTACA	0	0	0	0	0	0.000227654	0	0	0	0	3
5647	GAACTGCTCAGCAGAGAACCCCCCCGGTCCCGGGCTGCTGGCACA	0	0	0	0	0	0.00265596	0	0	0	0	3
5653	GAACTGCTCAGCAGCCCCCCAGTCTTGGCTACTGGCACA	0	0	0	0	0	0.00192747	0	0	0	0	3
5664	GAACTGCTCAGCATAAACCCCTGCATCACTGCTGGCACA	0	0	0	0	0	0.0271363	0	0	0	0	3
5667	GAACTGCTCAGCATAAATACCCCAGTCTTCACTGCTGGCACA	0	0	0	0	0	7.58845e-05	0	0	0	0	3
5685	GAACTGCTCAGCATAAGCCCCCTGTTTGCGGCTGCTGGCACA	0	0	0	0	0	9.10614e-05	0	0	0	0	3
5688	GAACTGCTCAGCATAAGTCCCCCCAGCCCTATCACTGCTGGCACA	0	0	0	0	0	0.0348917	0	0	0	0	3
5693	GAACTGCTCAGCATAATTCTCTCCCTGTCCCTCTGCACTGCA	0	0	0	0	0	0.000227654	0	0	0	0	3
5698	GAACTGCTCAGCATACCACCCCCCATCTGCACTGCA	0	0	0	0	0	0.0144332	0	0	0	0	3
5699	GAACTGCTCAGCATACCACCCCTCATCTGCACTGCAGGTGCAGTACAAGGTTCTGCCCTGGCA	0	0	0	0	0	0.000166946	0	0	0	0	3
5761	GAACTGCTCAGCATACTCCCCCTGCCCTTGGCTGCTGGCACA	0	0	0	0	0	0.103157	0	0	0	0	3
5795	GAACTGCTCAGCATAGACCCTCAGGAGATCTGCACTGCA	0	0	0	0	0	0.00651089	0	0	0	0	3
5836	GAACTGCTCAGCATAGATTGGAGAACTACA	0	0	0	0	0	0.000531192	0	0	0	0	3
5854	GAACTGCTCAGCATAGCCCCCAGTCCCGGGGCTGCTGGCACA	0	0	0	0	0	0.427549	0	0	0	0	3
5859	GAACTGCTCAGCATAGCCCCCAGTCCGGGCACTGCA	0	0	0	0	0	0.335167	0	0	0	0	3
5871	GAACTGCTCAGCATAGCCCCCCCAGTCCGAACTACA	0	0	0	0	0	0.000121415	0	0	0	0	3
5912	GAACTGCTCAGCATAGCCCCTGGCTTGGCTGCTGGCACA	0	0	0	0	0	0.282655	0	0	0	0	3
5920	GAACTGCTCAGCATAGCCCTCTCTAGAACTACA	0	0	0	0	0	0.151541	0	0	0	0	3
5937	GAACTGCTCAGCATAGCGCCCCCCTAGCCTGCTGGCACA	0	0	0	0	0	0.000910614	0	0	0	0	3
5939	GAACTGCTCAGCATAGCTCCCCAGTAGAGGACCGCTGGCACA	0	0	0	0	0	0.0747463	0	0	0	0	3
5946	GAACTGCTCAGCATAGCTCTGTCCGGCACTGCA	0	0	0	0	0	0.00154804	0	0	0	0	3
5964	GAACTGCTCAGCATAGGACCCCCAGTCCACACCGCTGGCACA	0	0	0	0	0	0.0647447	0	0	0	0	3
5965	GAACTGCTCAGCATAGGACCCCCAGTCTGCACTGCGGGCGCA	0	0	0	0	0	0.00285326	0	0	0	0	3
5966	GAACTGCTCAGCATAGGACCCCCCCAGATCCGCACTGCA	0	0	0	0	0	0.00379423	0	0	0	0	3
6029	GAACTGCTCAGCATAGTCCCCCCCGTCTGCACTGCA	0	0	0	0	0	0.669332	0	0	0	0	3
6031	GAACTGCTCAGCATAGTCCCCCGGGAGACTGCA	0	0	0	0	0	0.00101685	0	0	0	0	3
6049	GAACTGCTCAGCATAGTCGATGCCCTGGCTGCTGGCACA	0	0	0	0	0	0.0886331	0	0	0	0	3
6050	GAACTGCTCAGCATAGTCGCCCCCAACTTGGCTGCCGGCACA	0	0	0	0	0	0.000728492	0	0	0	0	3
6053	GAACTGCTCAGCATAGTCGCCGGTCTGGCTGCTGGCACA	0	0	0	0	0	0.00251937	0	0	0	0	3
6057	GAACTGCTCAGCATAGTCTCCCCCCTGATCTTGGCTGCA	0	0	0	0	0	0.000652607	0	0	0	0	3
6073	GAACTGCTCAGCATAGTTAAAATTTGCACTGCA	0	0	0	0	0	0.0424346	0	0	0	0	3
6094	GAACTGCTCAGCATAGTTAACTGTTTCTTGGCTGCTGGCACA	0	0	0	0	0	0.0335106	0	0	0	0	3
6124	GAACTGCTCAGCATAGTTACGCCCCCCAGCTAAGCTGCTGGCACA	0	0	0	0	0	0.00191229	0	0	0	0	3
6127	GAACTGCTCAGCATAGTTACTCCCCAGTTTATCTGCACTGCAGGTGCAGTACAAGGTTCTGCACCTGCAGTGCGGACAGGGTTGAACAGTACTTCGGTCCCGGCACCAGGCACA	0	0	0	0	0	0.000288361	0	0	0	0	3
6128	GAACTGCTCAGCATAGTTACTCCCCAGTTTGCTCCAGGCACA	0	0	0	0	0	0.000151769	0	0	0	0	3
6130	GAACTGCTCAGCATAGTTACTGGCTGCACTGCA	0	0	0	0	0	0.47531	0	0	0	0	3
6136	GAACTGCTCAGCATAGTTAGCCACCCAATCACCGCTGGCACA	0	0	0	0	0	0.0441344	0	0	0	0	3
6150	GAACTGCTCAGCATAGTTATATTCCCCTGTCCCGGAGCTGCTTGCACA	0	0	0	0	0	0.00297467	0	0	0	0	3
6190	GAACTGCTCAGCATAGTTATTTGAGGCACTGCA	0	0	0	0	0	0.425333	0	0	0	0	3
6191	GAACTGCTCAGCATAGTTATTTGAGGCACTGCAGGTGCAGTACAAGGTTCTGCCCTGGCTGCCGGCACA	0	0	0	0	0	0.000136592	0	0	0	0	3
6200	GAACTGCTCAGCATAGTTCCCAGTCCTGGCACTGCA	0	0	0	0	0	0.000121415	0	0	0	0	3
6204	GAACTGCTCAGCATAGTTCCCCAGACTCCTAGCACCACA	0	0	0	0	0	9.10614e-05	0	0	0	0	3
6205	GAACTGCTCAGCATAGTTCCCCAGATCTTGGCTGCTGGCACA	0	0	0	0	0	0.536215	0	0	0	0	3
6216	GAACTGCTCAGCATAGTTCCCCCAGTCCGGGCTGCTGGCACA	0	0	0	0	0	0.0633484	0	0	0	0	3
6220	GAACTGCTCAGCATAGTTCCCCCAGTCTGTACTGCA	0	0	0	0	0	0.00855978	0	0	0	0	3
6224	GAACTGCTCAGCATAGTTCCCCCCAGTAGCACTGCAGGTGCAGTACAAGGAATAGTGCAGAAACGCTGTATTTTGGCTGCTGGCACA	0	0	0	0	0	0.000136592	0	0	0	0	3
6227	GAACTGCTCAGCATAGTTCCCCCCAGTCGCACTGCA	0	0	0	0	0	0.132024	0	0	0	0	3
6246	GAACTGCTCAGCATAGTTCCCCCGGTCTGCACTGCAGGTGCAGTACAAGGTTCTGCTGGCACA	0	0	0	0	0	0.0003946	0	0	0	0	3
6249	GAACTGCTCAGCATAGTTCCCCGGGGCTACAGCACCACA	0	0	0	0	0	7.58845e-05	0	0	0	0	3
6252	GAACTGCTCAGCATAGTTCCCCTCATCTGCACTGCA	0	0	0	0	0	0.00044013	0	0	0	0	3
6283	GAACTGCTCAGCATAGTTCCGCCCCCCCAGCCCCGAACTGCTGGCACA	0	0	0	0	0	0.00212477	0	0	0	0	3
6309	GAACTGCTCAGCATAGTTCTGTCCCGGAGCACTGCGGGTGCA	0	0	0	0	0	0.00311127	0	0	0	0	3
6310	GAACTGCTCAGCATAGTTCTGTCCCGTTCTGCTGGCACA	0	0	0	0	0	0.000455307	0	0	0	0	3
6313	GAACTGCTCAGCATAGTTGACCCCTGTCTGTCTGCTGGCACA	0	0	0	0	0	0.000151769	0	0	0	0	3
6329	GAACTGCTCAGCATAGTTGGCCCCAGGATCTTGGCTGCA	0	0	0	0	0	0.000485661	0	0	0	0	3
6344	GAACTGCTCAGCATAGTTGTCCCGGTCACTGCA	0	0	0	0	0	0.0438006	0	0	0	0	3
6353	GAACTGCTCAGCATAGTTTAGGCCCCCAGTGGGACCGCCGGCACA	0	0	0	0	0	0.00153287	0	0	0	0	3
6379	GAACTGCTCAGCATAGTTTGCCCCTGTCTTGCA	0	0	0	0	0	0.0656249	0	0	0	0	3
6381	GAACTGCTCAGCATAGTTTGGGGGGCTGCTGGCACA	0	0	0	0	0	0.000318715	0	0	0	0	3
6392	GAACTGCTCAGCATAGTTTTGTCCCCCACTGCA	0	0	0	0	0	0.427488	0	0	0	0	3
6393	GAACTGCTCAGCATAGTTTTGTCCCCCACTGCAGGTGCAGTACAAGGTTCTGCCCTGGCTGCTGGCACA	0	0	0	0	0	0.000151769	0	0	0	0	3
6411	GAACTGCTCAGCATATCCCCCATATTCTGCACTGCA	0	0	0	0	0	0.0470181	0	0	0	0	3
6415	GAACTGCTCAGCATATCTGACTGCACTGCGGGTGCA	0	0	0	0	0	0.00347551	0	0	0	0	3
6421	GAACTGCTCAGCATATTCTGCACTGCAGGTGCAGTACAAGGTTCTGCCCTGGCTCATGTTGGCACA	0	0	0	0	0	0.00461378	0	0	0	0	3
6478	GAACTGCTCAGCATGCCCCCCCAAAGATTGACTGCTAGCACA	0	0	0	0	0	0.00702691	0	0	0	0	3
6481	GAACTGCTCAGCATGCGCCCCCCCAGAGTCTTGGCTGCTGGCACA	0	0	0	0	0	0.176189	0	0	0	0	3
6488	GAACTGCTCAGCATGGGCTGTCCCTTGGCTGCTGGCACA	0	0	0	0	0	0.000166946	0	0	0	0	3
6493	GAACTGCTCAGCATGGTTCCCCGCATCACTGCTGGCACA	0	0	0	0	0	0.000880261	0	0	0	0	3
6502	GAACTGCTCAGCATTCCTCCCCAGTACTTGGCTGCTGGCACA	0	0	0	0	0	0.000379423	0	0	0	0	3
6504	GAACTGCTCAGCATTCGAACTGCA	0	0	0	0	0	0.178617	0	0	0	0	3
6517	GAACTGCTCAGCATTGTCCCGAAAACTGCTGGCACA	0	0	0	0	0	0.00125968	0	0	0	0	3
6524	GAACTGCTCAGCCACCCCCCAGTGGCTCCAGGCACA	0	0	0	0	0	0.000743668	0	0	0	0	3
6528	GAACTGCTCAGCCAGCCCCCCCAGTCTTAAGCTGCTGGCACA	0	0	0	0	0	7.58845e-05	0	0	0	0	3
6537	GAACTGCTCAGCCCCACCCAATGCACTGCA	0	0	0	0	0	0.0248598	0	0	0	0	3
6544	GAACTGCTCAGCCCCCAGTCCCCTAGCACCACA	0	0	0	0	0	0.000516015	0	0	0	0	3
6571	GAACTGCTCAGCCCCTGTCCCGGCACCGCA	0	0	0	0	0	0.00438613	0	0	0	0	3
6687	GAACTGCTCAGCTCTGCCCCCTGTCCCTTGGCTGCTGGCACA	0	0	0	0	0	0.0163911	0	0	0	0	3
6689	GAACTGCTCAGCTCTTCCCCCCAGTAAGCTGCTGGCACA	0	0	0	0	0	0.00129004	0	0	0	0	3
6704	GAACTGCTCAGTATAGTTATTGAAATCTGCACTGCA	0	0	0	0	0	0.000774022	0	0	0	0	3
6708	GAACTGCTCAGTCCCGCGCCCCCCCAGCCTAGAACTACA	0	0	0	0	0	0.219261	0	0	0	0	3
6709	GAACTGCTCAGTCCTCCCTGGATCCCTAGCACCACA	0	0	0	0	0	0.0001973	0	0	0	0	3
6722	GAACTGCTCCCTCCCCTGTCTACTGCA	0	0	0	0	0	0.0387618	0	0	0	0	3
6731	GAACTGCTCGGCATAGCCCCCCAGTCCGGGGCTGCTGGCACA	0	0	0	0	0	0.00227654	0	0	0	0	3
6734	GAACTGCTCGGCATAGCCTCCCCCACCGCTGGCACA	0	0	0	0	0	0.000819553	0	0	0	0	3
6759	GAACTGCTCTGCATAGACTGGAGAACTACA	0	0	0	0	0	0.00286844	0	0	0	0	3
6760	GAACTGCTCTGCATAGCCCTGTCCCAGACTGCTAGCACA	0	0	0	0	0	0.000151769	0	0	0	0	3
6765	GAACTGCTTAGCATAGCCCCCCCCCAGTTCTTGGCTGCTGGCACA	0	0	0	0	0	0.00239795	0	0	0	0	3
6790	GAACTGTTCAGCATAGTTATTGAAATCTGTACTGCGGGTGCA	0	0	0	0	0	0.000121415	0	0	0	0	3
6805	GAAGACCTCCCCCACTGCACTGCA	0	0	0	0	0	0.000409776	0	0	0	0	3
6808	GAAGACCTCCGTGTTCCCCTGTCCTGCACTGCA	0	0	0	0	0	9.10614e-05	0	0	0	0	3
6818	GAAGACCTCTGTGCCTCCCTGTCCCGGATCTGCACTGCA	0	0	0	0	0	0.00163911	0	0	0	0	3
6842	GAAGACCTCTGTGTTTTGTCCGTCACTGCTGGCACA	0	0	0	0	0	0.00314162	0	0	0	0	3
6847	GAAGACCTGCTCAGCATAGTTCCACCAGTCCGAACTGCA	0	0	0	0	0	7.58845e-05	0	0	0	0	3
6849	GAAGACCTTCGTATCTGCACTGCA	0	0	0	0	0	0.00112309	0	0	0	0	3
6866	GAAGACTCCTGTGCCCTGTCCCGCACTGCA	0	0	0	0	0	0.000698138	0	0	0	0	3
6877	GAAGACTCCTGTGTTTCCCTCCGCACTGCA	0	0	0	0	0	0.0170588	0	0	0	0	3
6895	GAAGACTTCCCCCACCGCACTGCA	0	0	0	0	0	0.000212477	0	0	0	0	3
6923	GAAGACTTCCGTGTTTCTGCCTTCTTGGCTGCTGGCACA	0	0	0	0	0	0.00124451	0	0	0	0	3
6951	GAAGACTTCTCCGTCCCGGACACTGCA	0	0	0	0	0	0.0121415	0	0	0	0	3
6953	GAAGACTTCTCTGCCCCGGACACTGCCGGTGCA	0	0	0	0	0	7.58845e-05	0	0	0	0	3
6956	GAAGACTTCTCTGTCCCGGGCACTGCA	0	0	0	0	0	0.00119898	0	0	0	0	3
6963	GAAGACTTCTGATGTCCCCGCATCACTGCTGGCACA	0	0	0	0	0	0.021961	0	0	0	0	3
6985	GAAGACTTCTGCGCCTCCCCTGGCACTGCA	0	0	0	0	0	0.000561546	0	0	0	0	3
6987	GAAGACTTCTGCGTCCATCTCTTGGCTGCTGGCACA	0	0	0	0	0	0.00129004	0	0	0	0	3
7001	GAAGACTTCTGCTGTTGCATCACCGCTGGCACA	0	0	0	0	0	0.0561242	0	0	0	0	3
7011	GAAGACTTCTGTACGCCCCCCCGAATCTTGGCTGCTGGCACA	0	0	0	0	0	0.000166946	0	0	0	0	3
7026	GAAGACTTCTGTCCCTGCCCCGGCTTGGCTGCTGGCACA	0	0	0	0	0	0.000986499	0	0	0	0	3
7037	GAAGACTTCTGTCTCCCTTGTTGGACTCCAGGCACA	0	0	0	0	0	0.0567161	0	0	0	0	3
7057	GAAGACTTCTGTGAGTGTCCCTGCACTGTAGGTGCA	0	0	0	0	0	0.000409776	0	0	0	0	3
7058	GAAGACTTCTGTGAGTTGTCTTGGGCTGCTGGCACA	0	0	0	0	0	0.0286995	0	0	0	0	3
7068	GAAGACTTCTGTGCCAGCCCTGTCTGCACTGCA	0	0	0	0	0	0.0326455	0	0	0	0	3
7077	GAAGACTTCTGTGCCCCCCTGTCCCACTGCACTGCA	0	0	0	0	0	0.306255	0	0	0	0	3
7090	GAAGACTTCTGTGCCCCCTGTCCCTTCTGCACTGCA	0	0	0	0	0	0.00100168	0	0	0	0	3
7105	GAAGACTTCTGTGCCCGCCCCCTGTCCACTGCA	0	0	0	0	0	0.154865	0	0	0	0	3
7106	GAAGACTTCTGTGCCCGCGCCCCCGGAGCTGCTGGCACA	0	0	0	0	0	0.0200942	0	0	0	0	3
7112	GAAGACTTCTGTGCCCTCCCCTGAGGCACTGCA	0	0	0	0	0	0.0518898	0	0	0	0	3
7116	GAAGACTTCTGTGCCCTGTCCCAAATCTTGGCTGCTGGCACA	0	0	0	0	0	0.03732	0	0	0	0	3
7121	GAAGACTTCTGTGCCGCCCCCTGCACTGCAGGTGCAGTACAAGGTTCTGCCCTGGCTCATGTTGGCCAGGGCAGAACCTTGTACTGCACCTGCAGTGCAGGGGGCGGCACA	0	0	0	0	0	0.000106238	0	0	0	0	3
7122	GAAGACTTCTGTGCCGCCCCCTGCACTGCGGGTGCA	0	0	0	0	0	0.00104721	0	0	0	0	3
7136	GAAGACTTCTGTGCCTCGCCCCCTGTGATCACCGCTGGCACA	0	0	0	0	0	0.0373807	0	0	0	0	3
7149	GAAGACTTCTGTGCGCCCCGCATCACTGCTGGCACA	0	0	0	0	0	0.0011838	0	0	0	0	3
7151	GAAGACTTCTGTGCTACTGTCCCGGGGGCTGCTGGCACA	0	0	0	0	0	0.0623467	0	0	0	0	3
7154	GAAGACTTCTGTGCTCCCCCGTTCTTGGCTGCTGGCACA	0	0	0	0	0	0.187556	0	0	0	0	3
7195	GAAGACTTCTGTGTAACCTGTCCCTTCTTGGCTGCTGGCACA	0	0	0	0	0	0.0886331	0	0	0	0	3
7208	GAAGACTTCTGTGTATGTCGATGCACCACA	0	0	0	0	0	0.0001973	0	0	0	0	3
7209	GAAGACTTCTGTGTATTGTCCCGAACTGCTGGCACA	0	0	0	0	0	0.000258007	0	0	0	0	3
7225	GAAGACTTCTGTGTCCATCTCTAGGCTGCTGGCACA	0	0	0	0	0	0.0003946	0	0	0	0	3
7269	GAAGACTTCTGTGTCCGCCCCCTGTATGCTGCTGGCACA	0	0	0	0	0	0.000409776	0	0	0	0	3
7279	GAAGACTTCTGTGTCTCCCCTCAAACTGCTAGCACA	0	0	0	0	0	0.0825017	0	0	0	0	3
7298	GAAGACTTCTGTGTCTGCGATGTCCCGGCCACTGCA	0	0	0	0	0	0.177524	0	0	0	0	3
7310	GAAGACTTCTGTGTGCCCTCTGTCTCGGCTGCTGGCACA	0	0	0	0	0	0.0299137	0	0	0	0	3
7311	GAAGACTTCTGTGTGCCCTGTCCCAGCACTGCGGGTGCA	0	0	0	0	0	0.001973	0	0	0	0	3
7319	GAAGACTTCTGTGTTAAGTCTTGCACTGCA	0	0	0	0	0	0.043755	0	0	0	0	3
7365	GAAGACTTCTGTGTTCCCTGTACTGCA	0	0	0	0	0	0.23122	0	0	0	0	3
7377	GAAGACTTCTGTGTTCCGGCCATCACTGCTGGCACA	0	0	0	0	0	0.00160875	0	0	0	0	3
7404	GAAGACTTCTGTGTTCTGTCCCGCACTGCCGGCACA	0	0	0	0	0	0.000774022	0	0	0	0	3
7425	GAAGACTTCTGTGTTGCCCCCTGTCCCTTCTGCACA	0	0	0	0	0	0.000182123	0	0	0	0	3
7471	GAAGACTTCTGTGTTTCCCCCTGTCCCACTGCTGGCACA	0	0	0	0	0	0.388498	0	0	0	0	3
7480	GAAGACTTCTGTGTTTCCCTCCGCACTGCAGGTGCAGACAGGGGGGACACCTTGGCTGCTGGCACA	0	0	0	0	0	0.000273184	0	0	0	0	3
7536	GAAGACTTCTGTGTTTGATGTCCCGAGACTGCGGGTGCA	0	0	0	0	0	0.00116862	0	0	0	0	3
7542	GAAGACTTCTGTGTTTGCAACCTGTGGGCTGCTGGCACA	0	0	0	0	0	0.140326	0	0	0	0	3
7545	GAAGACTTCTGTGTTTGCAATGTCCCGGCTGCTGGCACA	0	0	0	0	0	0.0486116	0	0	0	0	3
7571	GAAGACTTCTGTGTTTGCATGTCCCAGGCTGCTGGCACA	0	0	0	0	0	0.0161027	0	0	0	0	3
7603	GAAGACTTCTGTGTTTGCCCCTGCTTCTGCACTGCA	0	0	0	0	0	0.0689639	0	0	0	0	3
7618	GAAGACTTCTGTGTTTGCCCTGTCTGCACTGCGGGTGCA	0	0	0	0	0	0.00204888	0	0	0	0	3
7620	GAAGACTTCTGTGTTTGCCGTCCCGGTTTGGCTGCTGGCACA	0	0	0	0	0	0.00342998	0	0	0	0	3
7628	GAAGACTTCTGTGTTTGCCTGTACATCTGCACTGCA	0	0	0	0	0	0.398242	0	0	0	0	3
7636	GAAGACTTCTGTGTTTGCGCCCTGCCCCCGATCTGCACTGCA	0	0	0	0	0	0.00403706	0	0	0	0	3
7637	GAAGACTTCTGTGTTTGCGCCCTGTCCCCGATCTGCACTGCAGGTGCAGTACAAGGTTCTGCCCTGGGTGCTAGCACA	0	0	0	0	0	0.000409776	0	0	0	0	3
7640	GAAGACTTCTGTGTTTGCGGCCCCCAGACTGCTGGCACA	0	0	0	0	0	0.0248142	0	0	0	0	3
7642	GAAGACTTCTGTGTTTGCGGCCCTGTTTGCACTGCA	0	0	0	0	0	0.0286236	0	0	0	0	3
7643	GAAGACTTCTGTGTTTGCGGCCCTGTTTGCACTGCAGGTGCAGTACAAGGTTCTGCCCTGGCTCATGTTGGCACA	0	0	0	0	0	0.000106238	0	0	0	0	3
7658	GAAGACTTCTGTGTTTGCTCTGTCTAGACTCCAGGCACA	0	0	0	0	0	0.0571259	0	0	0	0	3
7676	GAAGACTTCTGTGTTTGCTGTCCGGGGATCTGCACTGCA	0	0	0	0	0	0.0266203	0	0	0	0	3
7688	GAAGACTTCTGTGTTTGGCCCCTCTTCTTGGCCGCTGGCACA	0	0	0	0	0	0.011413	0	0	0	0	3
7701	GAAGACTTCTGTGTTTGGTGTCCCGGGACTGCTGGCACA	0	0	0	0	0	0.21961	0	0	0	0	3
7725	GAAGACTTCTGTGTTTGTGTCCTCTTGGCTGCTGGCACA	0	0	0	0	0	0.0914105	0	0	0	0	3
7731	GAAGACTTCTGTGTTTGTTGTCCCCCAACTGCTGGCACA	0	0	0	0	0	0.000591899	0	0	0	0	3
7732	GAAGACTTCTGTGTTTGTTGTCCCCGCCTCTTGGCTGCA	0	0	0	0	0	0.000470484	0	0	0	0	3
7734	GAAGACTTCTGTGTTTGTTGTCCCGGTGCCGCTGGCACA	0	0	0	0	0	0.0589926	0	0	0	0	3
7739	GAAGACTTCTGTGTTTTCCCCGTAGGCACTGCA	0	0	0	0	0	0.00274702	0	0	0	0	3
7741	GAAGACTTCTGTGTTTTCCCTGTAGGCACTGCAGGTGCAGTACAAGGTTCTGCACCTGCAGTCGGACTGGGGGGAAGACACCCAGTACTTTGGGCCAGGCACTCGGCTGGCACA	0	0	0	0	0	0.000242831	0	0	0	0	3
7750	GAAGACTTCTGTGTTTTGCCCATCTTGGCTGCTGGCACA	0	0	0	0	0	0.0577178	0	0	0	0	3
7802	GAAGACTTGCGCCCCCTTATCACCGCTGGCACA	0	0	0	0	0	0.0180909	0	0	0	0	3
7804	GAAGACTTTCGTATCGGCACTGCA	0	0	0	0	0	0.000956145	0	0	0	0	3
7805	GAAGACTTTCGTATCTGCACTGCAGGTGCAGTACAAGGTTCTGCCCTGGCTCATGTTGGCCACTTGCAGAACCTTGTACTGCACCTGCAGTCGGACTGGGGGGAAGACACCCAGTACTTTGGGCCAGGCACA	0	0	0	0	0	0.000106238	0	0	0	0	3
7807	GAAGACTTTTGTGTCCACACTGCTGGTACA	0	0	0	0	0	7.58845e-05	0	0	0	0	3
7824	GAAGAGCTGCTCAGCACCTCCTGTCCCTAAATCTGCACTGCA	0	0	0	0	0	0.00135074	0	0	0	0	3
7837	GAAGAGCTGCTCAGCATAGATCCCCCCCAGTACTTGGCCGCTGGCACA	0	0	0	0	0	0.00083473	0	0	0	0	3
7869	GAAGAGCTGCTCAGCATAGTTCCCCCGAGGGCTGCTGGCACA	0	0	0	0	0	0.00614665	0	0	0	0	3
7877	GAAGAGCTGCTCAGCATAGTTGTCCCAGCCCTGGCTGCTGGCACA	0	0	0	0	0	0.00147216	0	0	0	0	3
7884	GAAGAGCTGCTCAGCATATCTGACTGCACTGCA	0	0	0	0	0	0.00342998	0	0	0	0	3
7887	GAAGAGCTGCTCAGCATCCCCTGTCCCGGGGCTGCTGGCACA	0	0	0	0	0	0.00227654	0	0	0	0	3
7974	GAAGGACTGCTCAGCATAGGACCCCCAGTCTGCACTGCA	0	0	0	0	0	0.000804376	0	0	0	0	3
7989	GAAGGACTGCTCAGCATAGTTCCCTTGGCTGCTGGCACA	0	0	0	0	0	0.00112309	0	0	0	0	3
7992	GAAGGACTGCTCAGCATAGTTCTGTCCCGGAGCACTGCA	0	0	0	0	0	0.00373352	0	0	0	0	3
8008	GAAGGACTGCTCAGCCCCCCCAGTATCACTGCTGGCACA	0	0	0	0	0	0.0017757	0	0	0	0	3
8011	GAAGGACTGCTCAGCCCCTGTCCCACTGCA	0	0	0	0	0	7.58845e-05	0	0	0	0	3
8014	GAAGGACTGCTCAGCCCTCCCTGTCGGGCTGCTGGCACA	0	0	0	0	0	0.00116862	0	0	0	0	3
8016	GAAGGACTGCTCAGCTCGCCCCCCCCCCTCTTGGCTGCTGGCACA	0	0	0	0	0	0.000516015	0	0	0	0	3
8043	GAAGGCTTCTGTGTCCACACCGCTGGCACA	0	0	0	0	0	0.00212477	0	0	0	0	3
8059	GAAGGCTTCTGTGTTTGGATCTGTCTCTGCACTGCA	0	0	0	0	0	0.00312644	0	0	0	0	3
8080	GAAGGGCGAATTATATTGGGCACTGCGGGTGCA	0	0	0	0	0	9.10614e-05	0	0	0	0	3
8108	GAAGGTGTAGTCGGACCCCCCTGTCCGGGGACTGCTAGCACA	0	0	0	0	0	0.030111	0	0	0	0	3
8114	GAAGGTGTAGTCGGACCGCCTGTCGGGAATACTGCTGGCACA	0	0	0	0	0	0.000106238	0	0	0	0	3
8148	GAAGGTGTAGTCGGAGCCCTGCTCCCTGTCTTCACTGCTGGCACA	0	0	0	0	0	0.00139628	0	0	0	0	3
8152	GAAGGTGTAGTCGGAGCCGTGCCCCCTCTGCCTGCA	0	0	0	0	0	0.0489	0	0	0	0	3
8205	GAAGGTGTAGTCGGAGTCCCTCCCCTGTCGACTGCTGGCACA	0	0	0	0	0	0.00112309	0	0	0	0	3
8243	GAAGGTGTAGTCGGAGTTCACCCCTTCACCGCTGGCACA	0	0	0	0	0	0.218897	0	0	0	0	3
8255	GAAGGTGTAGTCGGAGTTCCCGGTATCACCGCTGGCACA	0	0	0	0	0	0.0419793	0	0	0	0	3
8277	GAAGGTGTAGTCGGAGTTCTGTCCCGCACTGCA	0	0	0	0	0	0.118866	0	0	0	0	3
8293	GAAGGTGTAGTCGGAGTTTCCCCCTGTCCCACTGCA	0	0	0	0	0	0.0658526	0	0	0	0	3
8303	GAAGGTGTAGTCGGAGTTTCTGTCCCCCTCACTGCTGGCACA	0	0	0	0	0	0.00136592	0	0	0	0	3
8315	GAAGGTGTAGTCGGAGTTTGATGAAGCACTGCA	0	0	0	0	0	0.0454093	0	0	0	0	3
8346	GAAGGTGTAGTCGGAGTTTGCCCCCTGTCTACTGCA	0	0	0	0	0	0.0716654	0	0	0	0	3
8354	GAAGGTGTAGTCGGAGTTTGCCCCTGTCTGGCTGCTGGCACA	0	0	0	0	0	0.000121415	0	0	0	0	3
8369	GAAGGTGTAGTCGGAGTTTGCGTCCCCTGGGCTGCTGGCACA	0	0	0	0	0	0.000607076	0	0	0	0	3
8442	GAAGGTGTAGTCGGAGTTTTGGCCACCGCTGGCACA	0	0	0	0	0	0.0918658	0	0	0	0	3
8474	GAAGGTGTAGTCGGGGTGCCGGTCCCCATCACTGCTGGCACA	0	0	0	0	0	0.0935656	0	0	0	0	3
8514	GAAGTACAAGGTGCTCGCCCCCTCATCTTGGCTGCTGGCACA	0	0	0	0	0	0.00297467	0	0	0	0	3
8515	GAAGTACAAGGTGTTTTCCCCCCAGTCTTCACTGCTGGCACA	0	0	0	0	0	0.001973	0	0	0	0	3
8517	GAAGTACAAGGTGTTTTGACCCCTGTCCCGGAGACTGCTAGCACA	0	0	0	0	0	0.00259525	0	0	0	0	3
8518	GAAGTACAAGGTGTTTTGACGGTCCCAGTCTTGGCTGCTGGTACA	0	0	0	0	0	0.000682961	0	0	0	0	3
8526	GAAGTACAGGGTGCGTTGCCTCCCCCCTGCACTGCA	0	0	0	0	0	7.58845e-05	0	0	0	0	3
8530	GAAGTACCCGGTCCCTTCGTCACCGCTGGCACA	0	0	0	0	0	0.00968287	0	0	0	0	3
8543	GAAGTACCGCTCCCCCTGTGCACTGCA	0	0	0	0	0	0.00153287	0	0	0	0	3
8549	GAAGTACCGTTCAACCCCCCCCAGGTCTTGGCTGCTGGCACA	0	0	0	0	0	0.00171499	0	0	0	0	3
8558	GAAGTACCGTTCAGTCCAGTCGGGGCTGCTGGCACA	0	0	0	0	0	0.000470484	0	0	0	0	3
8591	GAAGTACTCCCCCTTCCCGCTGGCACA	0	0	0	0	0	0.000485661	0	0	0	0	3
8606	GAAGTACTGCCCATAGGACCCTGTCCCGGCTGCACTGCA	0	0	0	0	0	0.00286844	0	0	0	0	3
8615	GAAGTACTGCCCCCCCCAGTCCCCATCTGCACTGCAGGTGCAGTACAAGGTTCTGCCCTGGCTCATGTTGGCACA	0	0	0	0	0	0.0001973	0	0	0	0	3
8616	GAAGTACTGCCCCCCCCAGTCCCCATCTGCATTGCA	0	0	0	0	0	0.00250419	0	0	0	0	3
8617	GAAGTACTGCCCGACCCCTGTATCTGCACTGCA	0	0	0	0	0	0.0548342	0	0	0	0	3
8622	GAAGTACTGCTCAACCAGCGCCCCCCCAGTCCCGGCTGCACTGCA	0	0	0	0	0	0.246974	0	0	0	0	3
8625	GAAGTACTGCTCAACCCCCCAGTACCGATCTGCACTGCAGGTGCAGTACAAGGTTCTGCCCTGGCTGCTGGCACA	0	0	0	0	0	0.000227654	0	0	0	0	3
8627	GAAGTACTGCTCAACCCCCTCTGCACTGTAGGTGCA	0	0	0	0	0	0.000880261	0	0	0	0	3
8628	GAAGTACTGCTCAACCCCCTCTGCATCACTGCTGGCACA	0	0	0	0	0	0.000182123	0	0	0	0	3
8632	GAAGTACTGCTCAAGCCCCCTGTCTGCACTGCA	0	0	0	0	0	7.58845e-05	0	0	0	0	3
8636	GAAGTACTGCTCAAGCGCCCCCTGAAAGGCACA	0	0	0	0	0	0.159115	0	0	0	0	3
8656	GAAGTACTGCTCACCAGACCCTGTCCCGGCCGCACTGCA	0	0	0	0	0	0.0642742	0	0	0	0	3
8659	GAAGTACTGCTCACCCCCACA	0	0	0	0	0	0.000273184	0	0	0	0	3
8670	GAAGTACTGCTCACCCCGATCTTGGCTGCTGGCACA	0	0	0	0	0	0.40577	0	0	0	0	3
8677	GAAGTACTGCTCACCCTGATCTGCGCTGCA	0	0	0	0	0	0.00242831	0	0	0	0	3
8684	GAAGTACTGCTCACCTGGATCTGCACTGCGGGTGCA	0	0	0	0	0	0.00182123	0	0	0	0	3
8685	GAAGTACTGCTCACGCGCCCCCCCAGTCCCAGCACCGCA	0	0	0	0	0	0.00227654	0	0	0	0	3
8695	GAAGTACTGCTCAGCATAGTTCCCCCGGTCCGCACTGCA	0	0	0	0	0	0.000288361	0	0	0	0	3
8697	GAAGTACTGCTCAGCCCCCCAGTACCGATCTGCACTGCA	0	0	0	0	0	0.00623771	0	0	0	0	3
8698	GAAGTACTGCTCAGCCCCCTGATCTGCACTGCAGGTGCA	0	0	0	0	0	0.000728492	0	0	0	0	3
8728	GAAGTACTGCTCATAACCCTGTCCGGGGCTGCTGGCACA	0	0	0	0	0	0.50574	0	0	0	0	3
8777	GAAGTACTGCTCATACCCCCCCAGTTTGCTCCAGGCACA	0	0	0	0	0	9.10614e-05	0	0	0	0	3
8804	GAAGTACTGCTCATACCCTGTTGCACTGCGGGTGCA	0	0	0	0	0	0.00159358	0	0	0	0	3
8805	GAAGTACTGCTCATACCGGAGATCTTGGCTGCA	0	0	0	0	0	0.00083473	0	0	0	0	3
8819	GAAGTACTGCTCATACTTGCGATCTCTAGAACTACA	0	0	0	0	0	0.0695254	0	0	0	0	3
8821	GAAGTACTGCTCATAGAAGGGCCCTGTCAGATCTGCACTGCA	0	0	0	0	0	9.10614e-05	0	0	0	0	3
8832	GAAGTACTGCTCATAGACCCTCCCGACTGCACTGCA	0	0	0	0	0	0.00173017	0	0	0	0	3
8837	GAAGTACTGCTCATAGAGAGTTTCTTGGCTGCTGGCACA	0	0	0	0	0	0.0368495	0	0	0	0	3
8848	GAAGTACTGCTCATAGATCTGTCCCGGGGCACTGCA	0	0	0	0	0	0.0482019	0	0	0	0	3
8855	GAAGTACTGCTCATAGCCCAGCCTATGGCTGCTGGCACA	0	0	0	0	0	0.000500838	0	0	0	0	3
8867	GAAGTACTGCTCATAGCCCCCCCAGGAGCA	0	0	0	0	0	0.0542574	0	0	0	0	3
8890	GAAGTACTGCTCATAGCTGGGATCTTGGCCGCTGGCACA	0	0	0	0	0	0.00103203	0	0	0	0	3
8895	GAAGTACTGCTCATAGCTGTCCCCACTGCGGGTGCA	0	0	0	0	0	0.00229171	0	0	0	0	3
8907	GAAGTACTGCTCATAGGACACCCCAGTGGCACTGCA	0	0	0	0	0	0.0546976	0	0	0	0	3
8913	GAAGTACTGCTCATAGGACCCGCGATCTGCACCGCA	0	0	0	0	0	0.000288361	0	0	0	0	3
8914	GAAGTACTGCTCATAGGACCTGCGCTCTGCACTGCA	0	0	0	0	0	0.000151769	0	0	0	0	3
8917	GAAGTACTGCTCATAGGAGAAACCCCTGTCCCCTTGGCTGCTGGCACA	0	0	0	0	0	0.000212477	0	0	0	0	3
8918	GAAGTACTGCTCATAGGAGAAACCCCTGTCCCTTTCCGCACTGCA	0	0	0	0	0	0.00142663	0	0	0	0	3
8929	GAAGTACTGCTCATAGGAGACCCCCCAGCCCGGGCTGCTGGCACA	0	0	0	0	0	0.00306574	0	0	0	0	3
8930	GAAGTACTGCTCATAGGAGACCTGTGTACCTTGGCTGCTGGCACA	0	0	0	0	0	0.00223101	0	0	0	0	3
8953	GAAGTACTGCTCATAGGAGCCCACTGCACTGTAGGTGCA	0	0	0	0	0	0.000166946	0	0	0	0	3
8957	GAAGTACTGCTCATAGGAGCCCCAGTCTTCTTGGCTGCCGGCACA	0	0	0	0	0	0.00173017	0	0	0	0	3
8968	GAAGTACTGCTCATAGGAGCCCCCCGTCCTCCTGCA	0	0	0	0	0	0.000166946	0	0	0	0	3
8972	GAAGTACTGCTCATAGGAGCCCTGTCCCCCACTGCA	0	0	0	0	0	0.502507	0	0	0	0	3
8977	GAAGTACTGCTCATAGGAGCTCAGAAGATCCGCACTGCA	0	0	0	0	0	0.00242831	0	0	0	0	3
8978	GAAGTACTGCTCATAGGAGCTCAGAAGATCTGCACTGCAGGTGCAGTACAAGGTTCTGCCCTGGCTCATGTTGGCACA	0	0	0	0	0	0.000424953	0	0	0	0	3
8990	GAAGTACTGCTCATAGGAGCTCCCGTCTGCACTGCA	0	0	0	0	0	0.417319	0	5.13905e-05	0	0	3
9000	GAAGTACTGCTCATAGGAGCTCGCCCCCCCATCTTGGCCGCTGGCACA	0	0	0	0	0	0.00163911	0	0	0	0	3
9006	GAAGTACTGCTCATAGGAGCTGTAAGCACTGCTGGCACA	0	0	0	0	0	9.10614e-05	0	0	0	0	3
9008	GAAGTACTGCTCATAGGAGCTGTCCATCTCTTGGCTGCTGGCACA	0	0	0	0	0	0.0825927	0	0	0	0	3
9037	GAAGTACTGCTCATAGGAGGAGCCCCGGCCACTGCA	0	0	0	0	0	0.00253454	0	0	0	0	3
9042	GAAGTACTGCTCATAGGAGGTGTCCAGATCTTGGCTGCTGGCAGCACTGCA	0	0	0	0	0	0.000576722	0	0	0	0	3
9048	GAAGTACTGCTCATAGGAGTAGCCCCCCAGCCCAGCACTGCA	0	0	0	0	0	0.00689032	0	0	0	0	3
9062	GAAGTACTGCTCATAGGAGTGGCGTTCTTGGCTGCTGGCACA	0	0	0	0	0	0.184369	0	0	0	0	3
9063	GAAGTACTGCTCATAGGAGTGGGGTGCACTGCA	0	0	0	0	0	0.166931	0	0	0	0	3
9071	GAAGTACTGCTCATAGGATTTGTCCAGATCTGCACTGCA	0	0	0	0	0	0.056018	0	0	0	0	3
9073	GAAGTACTGCTCATAGGCCCCCAGTCCCTCTGCACTGCA	0	0	0	0	0	0.00443166	0	0	0	0	3
9077	GAAGTACTGCTCATAGGCCCCCCAGTCATCTGCACTGCA	0	0	0	0	0	0.154835	0	0	0	0	3
9079	GAAGTACTGCTCATAGGCCCCCTGTCCCGGGGGGCTGGCACA	0	0	0	0	0	0.000500838	0	0	0	0	3
9100	GAAGTACTGCTCATAGGGGCTCGGAAGATCTGCACTGCA	0	0	0	0	0	0.000212477	0	0	0	0	3
9101	GAAGTACTGCTCATAGGGGCTGTAAGCACTGCAGGTGCAGTACAAGGTTCTGCCCTGGCTCATGTTGGCCACTTCACCGCTGGCACA	0	0	0	0	0	0.000166946	0	0	0	0	3
9102	GAAGTACTGCTCATAGGGGGCCTGCCCCACTGCACTGCA	0	0	0	0	0	0.00383976	0	0	0	0	3
9117	GAAGTACTGCTCATAGGTCTGTCCCGAAGAACTACA	0	0	0	0	0	0.145956	0	0	0	0	3
9131	GAAGTACTGCTCATAGTCCCCCCAATCCCGTTGGCTGCTGGCACA	0	0	0	0	0	0.000409776	0	0	0	0	3
9139	GAAGTACTGCTCATAGTTGAGTGCACTGCGGGTGCA	0	0	0	0	0	0.00122933	0	0	0	0	3
9140	GAAGTACTGCTCATAGTTGGCATCTTGGCTGCTGGCGCA	0	0	0	0	0	0.00352104	0	0	0	0	3
9146	GAAGTACTGCTCATATATCGCCAGCGGGGTTGCATCACCGCTGGCACA	0	0	0	0	0	0.00289879	0	0	0	0	3
9147	GAAGTACTGCTCATATCCCAGTCCCCCATCTGCACTGCA	0	0	0	0	0	0.058765	0	0	0	0	3
9152	GAAGTACTGCTCATATCCCCCCCAGAAATCTGCACTGCA	0	0	0	0	0	0.197543	0	0	0	0	3
9153	GAAGTACTGCTCATATCCCCCCCAGAAATCTGCACTGCAGGTGCAGTACAAGGTTCTGCCCTGGCTCATGTTGGCCACTTGCAGCCTCAGCTCCGTATCTTGGCTGCTGGCACA	0	0	0	0	0	0.000151769	0	0	0	0	3
9154	GAAGTACTGCTCATATCCCCCCCAGAAATCTTGGCTGCTGGCACA	0	0	0	0	0	0.000136592	0	0	0	0	3
9165	GAAGTACTGCTCATATCTCTGTCCCGTCCCACTGCA	0	0	0	0	0	0.0396573	0	0	0	0	3
9185	GAAGTACTGCTCATCCCCCCACCTATCTGCACTGCGGGTGCA	0	0	0	0	0	0.00346033	0	0	0	0	3
9204	GAAGTACTGCTCATCCGCGCCCCCCCAGTCACTGCTGGCACA	0	0	0	0	0	0.0108515	0	0	0	0	3
9251	GAAGTACTGCTCCAGCCCCCTGCCTGCACTGCA	0	0	0	0	0	0.00245866	0	0	0	0	3
9260	GAAGTACTGCTCCCCACCCCTGTCCGGGCTGCTGGCACA	0	0	0	0	0	0.0406741	0	0	0	0	3
9275	GAAGTACTGCTCCCCCTGTGCACTGCAGGTGCAGTACAAGGTTCTGCCCTGGCTCATGTTGGCTGCTGCACA	0	0	0	0	0	0.000136592	0	0	0	0	3
9281	GAAGTACTGCTCCCCTCGCCCCCCCGGATCTGCACTGCA	0	0	0	0	0	0.329916	0	0	0	0	3
9295	GAAGTACTGCTCCCTCTGTGCACTGCA	0	0	0	0	0	0.000136592	0	0	0	0	3
9312	GAAGTACTGCTCGTAGGACCTGCGATCTGCACTGCA	0	0	0	0	0	0.00292914	0	0	0	0	3
9315	GAAGTACTGCTCGTAGGAGCCCCCAGTCCTCCTGCA	0	0	0	0	0	0.00245866	0	0	0	0	3
9325	GAAGTACTGCTCTAACCCCCAGTCTACTGCACTGCA	0	0	0	0	0	0.121992	0	0	0	0	3
9349	GAAGTACTGCTCTCTCCCCTCGTCTTGGCTGCTGGCACA	0	0	0	0	0	0.0365156	0	0	0	0	3
9364	GAAGTACTGGGTGTCCTCCCCTGTCCCTGCACTGTAGGTGCA	0	0	0	0	0	0.000273184	0	0	0	0	3
9370	GAAGTACTGGGTGTCTTGATCCCCCAGACTCCAGGCACA	0	0	0	0	0	0.00300503	0	0	0	0	3
9374	GAAGTACTGGGTGTCTTGGCCCCCCGCTTGGCTGCTGGCACA	0	0	0	0	0	0.00153287	0	0	0	0	3
9392	GAAGTACTGTACATAGGAGGCCCCCGGCTCTTGGCTGCTGGCACA	0	0	0	0	0	0.00207924	0	0	0	0	3
9400	GAAGTACTGTCCATAGGAGACCCCCGGATCACTGCTGGCACA	0	0	0	0	0	0.00139628	0	0	0	0	3
9412	GAAGTACTGTCCATCCCTGTTGGCACCGCTGGCACA	0	0	0	0	0	0.00165428	0	0	0	0	3
9441	GAAGTACTGTTCAACCCTGTCCGCACTGCGGGTGCA	0	0	0	0	0	0.00399153	0	0	0	0	3
9457	GAAGTACTGTTCAAGCCCCCCCAGTCCCGGTTGGCTGCTGGCACA	0	0	0	0	0	0.0328732	0	0	0	0	3
9506	GAAGTACTGTTCACGCGCCCCCCCAAGTGCACTGCA	0	0	0	0	0	0.399122	0	0	0	0	3
9540	GAAGTACTGTTCATAAACCCTGTCCGTATCTTGGCTGCTGGCACA	0	0	0	0	0	0.00523603	0	0	0	0	3
9578	GAAGTACTGTTCATAAGGCCCCTGTTCTGCACTGCA	0	0	0	0	0	0.0522693	0	0	0	0	3
9586	GAAGTACTGTTCATAAGTTGCCCCCCTCTCACCGCTGGCACA	0	0	0	0	0	0.0772201	0	0	0	0	3
9587	GAAGTACTGTTCATAATAGTCGCGATCTAGGCTGCTGGCACA	0	0	0	0	0	0.0112916	0	0	0	0	3
9621	GAAGTACTGTTCATACCCCCAGTCCCTTGCACTGCA	0	0	0	0	0	0.202323	0	0	0	0	3
9625	GAAGTACTGTTCATACCCCCCAGAACTGCTAGCACA	0	0	0	0	0	0.0889215	0	0	0	0	3
9632	GAAGTACTGTTCATACCCCCCAGTCCGATGGCTCCAGGCACA	0	0	0	0	0	9.10614e-05	0	0	0	0	3
9633	GAAGTACTGTTCATACCCCCCCAGGAGATCTTGGCTGCTGGCACA	0	0	0	0	0	0.00229171	0	0	0	0	3
9635	GAAGTACTGTTCATACCCCCCCAGTCTGGAACTGCA	0	0	0	0	0	0.178996	0	0	0	0	3
9653	GAAGTACTGTTCATACCCCTTTTCACCACTGGCACA	0	0	0	0	0	0.000607076	0	0	0	0	3
9674	GAAGTACTGTTCATACGCCCCCAGGAGATCTGCACTGCA	0	0	0	0	0	0.0681747	0	0	0	0	3
9743	GAAGTACTGTTCATAGCCCCAGTCCACTTCACCGCA	0	0	0	0	0	0.000576722	0	0	0	0	3
9761	GAAGTACTGTTCATAGCCCCCCATATCACCGCTGGCACA	0	0	0	0	0	0.026256	0	0	0	0	3
9772	GAAGTACTGTTCATAGCCCCTGTCCACGCTAGAACTACA	0	0	0	0	0	0.0845202	0	0	0	0	3
9779	GAAGTACTGTTCATAGCCGTCCCGGCGTCTACTGCTAGCACA	0	0	0	0	0	0.00100168	0	0	0	0	3
9786	GAAGTACTGTTCATAGCTCCCAGTCCACAAACTGCTGGCACA	0	0	0	0	0	0.000470484	0	0	0	0	3
9794	GAAGTACTGTTCATAGCTGTCCCTCTCTTGGCCGCTGGCACA	0	0	0	0	0	0.000758845	0	0	0	0	3
9802	GAAGTACTGTTCATAGGACCCAGTCCGATCTGCACTGCA	0	0	0	0	0	0.12952	0	0	0	0	3
9805	GAAGTACTGTTCATAGGACCCCCCAATTGCATCACCGCTGGCACA	0	0	0	0	0	0.0243893	0	0	0	0	3
9816	GAAGTACTGTTCATAGGACCTGTCGCCACTGCTGGCACA	0	0	0	0	0	0.0826383	0	0	0	0	3
9842	GAAGTACTGTTCATAGGAGAGCCCCCAGTCTTGGCTGCTGGCACA	0	0	0	0	0	0.000166946	0	0	0	0	3
9854	GAAGTACTGTTCATAGGAGATGTCCCGGCTGGCACA	0	0	0	0	0	0.0386556	0	0	0	0	3
9952	GAAGTACTGTTCATAGGAGCTGACCCCCAGTCCGGGGCTGCCGGCACA	0	0	0	0	0	0.00165428	0	0	0	0	3
9989	GAAGTACTGTTCATAGGAGGGCCCTGTCAGATCTACACTGCA	0	0	0	0	0	0.000865084	0	0	0	0	3
10018	GAAGTACTGTTCATAGGAGTCTGTCCCGGCAGCACTGCA	0	0	0	0	0	0.00159358	0	0	0	0	3
10019	GAAGTACTGTTCATAGGAGTGACGTGCTGCGCTGCA	0	0	0	0	0	0.00270149	0	0	0	0	3
10026	GAAGTACTGTTCATAGGAGTGTTGTCCCGGCTGGCTGCTGGCACA	0	0	0	0	0	0.00204888	0	0	0	0	3
10032	GAAGTACTGTTCATAGGAGTTGTGATCTGCACTGCA	0	0	0	0	0	0.121051	0	0	0	0	3
10033	GAAGTACTGTTCATAGGAGTTGTGATCTTGGCTGCTGGCACA	0	0	0	0	0	0.000121415	0	0	0	0	3
10039	GAAGTACTGTTCATAGGATCCCCCACCATCTGCACTGCA	0	0	0	0	0	0.0641831	0	0	0	0	3
10078	GAAGTACTGTTCATAGGCCTGCCGATCACTGCTGGCACA	0	0	0	0	0	0.0476403	0	0	0	0	3
10084	GAAGTACTGTTCATAGGCTTGCCGTGCACTGCA	0	0	0	0	0	0.126408	0	0	0	0	3
10096	GAAGTACTGTTCATAGGGGAGGCCTGTCCCGGGGCTGCTGGCACA	0	0	0	0	0	0.00242831	0	0	0	0	3
10117	GAAGTACTGTTCATAGGTCCCCAGTCGACTGCTGGCACA	0	0	0	0	0	0.0640617	0	0	0	0	3
10118	GAAGTACTGTTCATAGGTCCCCAGTTTGCTCCAGGCACA	0	0	0	0	0	0.000121415	0	0	0	0	3
10148	GAAGTACTGTTCATAGTGGGGCCCAGAATCTTGGCTGCTGGCACA	0	0	0	0	0	0.118608	0	0	0	0	3
10150	GAAGTACTGTTCATAGTTCAGTCCCGGATGGGCGCTGGCACA	0	0	0	0	0	0.00957663	0	0	0	0	3
10171	GAAGTACTGTTCATATACCCCCTGTCCCGGAGGGGGGCTGCTGGCACA	0	0	0	0	0	0.00210959	0	0	0	0	3
10201	GAAGTACTGTTCATATGAGTGTCCCGGGTCTGCACTGCA	0	0	0	0	0	0.0567465	0	0	0	0	3
10234	GAAGTACTGTTCATCCCCAGTCCCACTGCGGGTGCA	0	0	0	0	0	0.00203371	0	0	0	0	3
10237	GAAGTACTGTTCATCCCCCATCCTAGCACCACA	0	0	0	0	0	0.000333892	0	0	0	0	3
10240	GAAGTACTGTTCATCCCCCCAGTCCTGAGCACCACA	0	0	0	0	0	0.000258007	0	0	0	0	3
10273	GAAGTACTGTTCATCGTATTCCCCTGCTGCACTGCA	0	0	0	0	0	0.000121415	0	0	0	0	3
10274	GAAGTACTGTTCATCGTATTCCCCTGCTGCATCACTGCTGGCACA	0	0	0	0	0	1.57676	0	0	0	0	3
10299	GAAGTACTGTTCATTCCAGTCGGCACCGCTGGCACA	0	0	0	0	0	0.212431	0	0	0	0	3
10324	GAAGTACTGTTCCCCATCTCCTGCCTGGCTGCTGGCACA	0	0	0	0	0	0.00100168	0	0	0	0	3
10358	GAAGTACTGTTCCCGCCCCTCCGCACTGCGGGTGCA	0	0	0	0	0	0.000379423	0	0	0	0	3
10367	GAAGTACTGTTCCCTCCCCCCGAAACTGCTAGCACA	0	0	0	0	0	0.0891643	0	0	0	0	3
10403	GAAGTACTGTTCGCGCCCCCCCAGGCCCCCATCTGCACTGCA	0	0	0	0	0	0.118896	0	0	0	0	3
10404	GAAGTACTGTTCGCGCCCCCCCAGTTTGCTCCAGGCACA	0	0	0	0	0	7.58845e-05	0	0	0	0	3
10408	GAAGTACTGTTCGGAAGCGCCCCCCCAGAACTGGCTGCTGGCACA	0	0	0	0	0	0.00124451	0	0	0	0	3
10418	GAAGTACTGTTCGTAGGCGCCCCCAGCTTGGCTGCTGGCACA	0	0	0	0	0	0.00156322	0	0	0	0	3
10421	GAAGTACTGTTCGTCACCCCAATCTGCACTGCA	0	0	0	0	0	0.0309002	0	0	0	0	3
10439	GAAGTACTGTTCTCCCCTGTCCCGGTCTTGGCTGCTGGCGCA	0	0	0	0	0	0.00183641	0	0	0	0	3
10440	GAAGTACTGTTCTCCCGCACTGCA	0	0	0	0	0	0.328519	0	0	0	0	3
10454	GAAGTACTGTTCTCGCCCCCTCCTCTTGCTGGCACA	0	0	0	0	0	0.0992266	0	0	0	0	3
10477	GAAGTAGAGCTGCCCGGTGTAGCTGCCACA	0	0	0	0	0	0.000166946	0	0	0	0	3
10478	GAAGTAGAGCTGCCCGGTGTCCTGCCCCCTGTCGGGGCTGCTGGCACA	0	0	0	0	0	0.00235242	0	0	0	0	3
10489	GAAGTAGAGGGGCGAATTATAGTTATTTGCACTGCA	0	0	0	0	0	0.000121415	0	0	0	0	3
10490	GAAGTAGAGGGGCGATTCCCACCCTGTCCCTGCACTGCA	0	0	0	0	0	0.00622253	0	0	0	0	3
10492	GAAGTAGTGCTCATAGGACCCTGTCCCGGGGCTTCTGGCACA	0	0	0	0	0	0.000121415	0	0	0	0	3
10517	GAAGTCGTATTCCCCTGCTGCATCACTGCTGGCACA	0	0	0	0	0	9.10614e-05	0	0	0	0	3
10525	GAAGTGCTGCTCACCCCAGCGGTCTTGGCCGCTGGCACA	0	0	0	0	0	7.58845e-05	0	0	0	0	3
10535	GAAGTGCTGCTCATCCCCCCACGCACTGCA	0	0	0	0	0	0.000728492	0	0	0	0	3
10589	GAATAATCTTTCGTTGAGCTGTCCCGGACTGCA	0	0	0	0	0	0.0030202	0	0	0	0	3
10590	GAATAATCTTTCGTTGGAAATTGTATCTTGGCTGCTGGCACA	0	0	0	0	0	0.00213994	0	0	0	0	3
10611	GAATTGCCCAGCATAGTTCCCCCAGTCCGAACTGCA	0	0	0	0	0	7.58845e-05	0	0	0	0	3
10620	TGCAAGACAGGGGCAAACTATGCTGAGCAGTTC	0	0	0	0	0	0.0594328	0	0	0	0	3
10631	TGCAATGTGGACAGTGCAGAAACGCTGTATTTT	0	0	0	0	0	0.000576722	0	0	0	0	3
10650	TGCACCAGCAGTGCCGACTGGGGGAGTGCAGAAACGCTGTATTTT	0	0	0	0	0	0.00408259	0	0	0	0	3
10652	TGCACCAGCAGTGCGTGGGGGGATGAGCAGTACTTC	0	0	0	0	0	0.000470484	0	0	0	0	3
10678	TGCACCCGCAGTCCGGGACAGCTCAACGAAAGATTATTT	0	0	0	0	0	0.00206406	0	0	0	0	3
10696	TGCACCCGCAGTGCACTCAACTATGAGCAGTACTTC	0	0	0	0	0	0.000925791	0	0	0	0	3
10697	TGCACCCGCAGTGCAGAAACAAACACCGGGCAGCTCTACTTT	0	0	0	0	0	0.00423436	0	0	0	0	3
10700	TGCACCCGCAGTGCAGAACAGTATAATTCGCCCCTCTACTTT	0	0	0	0	0	0.00629842	0	0	0	0	3
10709	TGCACCCGCAGTGCAGACAGGGCAAACACAGAAGTCTTC	0	0	0	0	0	0.00291397	0	0	0	0	3
10712	TGCACCCGCAGTGCAGACAGGGGGGACACCTTGTACTTT	0	0	0	0	0	0.000895437	0	0	0	0	3
10715	TGCACCCGCAGTGCAGACTGGGAAAACACCTTGTACTTT	0	0	0	0	0	0.00737598	0	0	0	0	3
10748	TGCACCCGCAGTGCAGATCGGGGACAGAGATATGAGCAGTACTTC	0	0	0	0	0	0.000106238	0	0	0	0	3
10749	TGCACCCGCAGTGCAGATCGGGGATCCACCGGGCAGCTCTACTTT	0	0	0	0	0	0.00142663	0	0	0	0	3
10763	TGCACCCGCAGTGCAGCACGTCACTCCTATGAACAGTACTTC	0	0	0	0	0	0.00191229	0	0	0	0	3
10768	TGCACCCGCAGTGCAGCGGACAGGGACACCCAGTACTTT	0	0	0	0	0	0.00292914	0	0	0	0	3
10775	TGCACCCGCAGTGCAGGATTGGGGGACACCGGGCAGCTCTACTTT	0	0	0	0	0	0.00209441	0	0	0	0	3
10776	TGCACCCGCAGTGCAGGCAACCAGGCTCAGCATTTT	0	0	0	0	0	0.00385493	0	0	0	0	3
10777	TGCACCCGCAGTGCAGGCAGGGGCGAAAGATTATTT	0	0	0	0	0	0.0003946	0	0	0	0	3
10780	TGCACCCGCAGTGCAGGGACAGAAACGCTGTATTTT	0	0	0	0	0	0.00393082	0	0	0	0	3
10792	TGCACCCGCAGTGCAGGGGGCGGCACAGAAGTCTTC	0	0	0	0	0	0.00176052	0	0	0	0	3
10805	TGCACCCGCAGTGCAGTCAGATATGCTGAGCAGTTC	0	0	0	0	0	0.00532709	0	0	0	0	3
10808	TGCACCCGCAGTGCAGTGGGGGGGCGGCAAAATACCTTGTACTTT	0	0	0	0	0	0.000303538	0	0	0	0	3
10818	TGCACCCGCAGTGCCAGAATTTCCAACGAAAGATTATTT	0	0	0	0	0	0.00596452	0	0	0	0	3
10823	TGCACCCGCAGTGCCCCAGGGGGCGGCACCGGGCAGCTCTACTTT	0	0	0	0	0	0.00349069	0	0	0	0	3
10831	TGCACCCGCAGTGCCGGGACTGGGGGAACCGGGCAGCTCTACTTT	0	0	0	0	0	0.00242831	0	0	0	0	3
10833	TGCACCCGCAGTGCCTGGGACCAAGACACCCAGTACTTT	0	0	0	0	0	0.00421918	0	0	0	0	3
10854	TGCACCCGCAGTGCGGGACTGGGGAGGAATGCTGAGCAGTTC	0	0	0	0	0	0.00342998	0	0	0	0	3
10864	TGCACCCGCAGTGCTCCGGGACAGAACTATGCTGAGCAGTTC	0	0	0	0	0	0.00279255	0	0	0	0	3
10870	TGCACCCGCAGTGCTGGGGGGAAAAACACCTTGTACTTT	0	0	0	0	0	0.00285326	0	0	0	0	3
10873	TGCACCCGCAGTGCTTACAGCTCCTATGAGCAGTACTTC	0	0	0	0	0	0.00247384	0	0	0	0	3
10896	TGCACCCGCAGTGGGGGTGAGCAGTACTTC	0	0	0	0	0	0.00367281	0	0	0	0	3
10901	TGCACCCGCAGTTCGGACTGGGGGAACTATGCTGAGCAGTTC	0	0	0	0	0	0.00312644	0	0	0	0	3
10931	TGCACCTACAGTGCAAGGGCCAACGAAAGATTATTT	0	0	0	0	0	0.000789199	0	0	0	0	3
10946	TGCACCTACAGTGCAGAGCTGGGCACCGGGCAGCTCTACTTT	0	0	0	0	0	0.0003946	0	0	0	0	3
10947	TGCACCTACAGTGCAGAGGGGGTTGAGCAGTACTTC	0	0	0	0	0	0.00104721	0	0	0	0	3
10950	TGCACCTACAGTGCAGATCGGACTGGGTCCTATGAACAGTACTTC	0	0	0	0	0	0.00168464	0	0	0	0	3
10983	TGCACCTACAGTGCGCAATATAATTCGCCCCTCTACTTT	0	0	0	0	0	0.0100319	0	0	0	0	3
10990	TGCACCTACAGTGCGGAGAGGGCAGAAACGCTGTATTTT	0	0	0	0	0	0.00148734	0	0	0	0	3
10995	TGCACCTACAGTGCTGACTGGGGGGGCGGCGGGCAGCTCTACTTT	0	0	0	0	0	0.00223101	0	0	0	0	3
11056	TGCAGAGGGACTGGGGGTGGCGCAGAAACGCTGTATTTT	0	0	0	0	0	0.00763398	0	0	0	0	3
11068	TGCAGCCAAGAAGAGGGGCCAAACACAGAAGTCTTC	0	0	0	0	0	0.00156322	0	0	0	0	3
11076	TGCAGCCAAGACTGGGACCGTCAAAACACCTTGTACTTT	0	0	0	0	0	0.00203371	0	0	0	0	3
11083	TGCAGCCAAGATACGGACAGGGTTTATGAGCAGTACTTC	0	0	0	0	0	0.000227654	0	0	0	0	3
11086	TGCAGCCAAGATCACAGGGGGCGAAGTGCAGAAACGCTGTATTTT	0	0	0	0	0	0.000303538	0	0	0	0	3
11090	TGCAGCCAAGATCCGGGGGGAAACACCTTGTACTTT	0	0	0	0	0	0.000242831	0	0	0	0	3
11092	TGCAGCCAAGATCTCCAGGGAGGAGACACCCAGTACTTT	0	0	0	0	0	0.0026256	0	0	0	0	3
11093	TGCAGCCAAGATCTGGACACCTCCTATGAGCAGTACTTC	0	0	0	0	0	0.000349069	0	0	0	0	3
11098	TGCAGCCAAGATGGGGTTAACCAAGACACCCAGTACTTT	0	0	0	0	0	0.00063743	0	0	0	0	3
11099	TGCAGCCAAGATGGTGGGAATTCTGGAAATACGCTCTATTTT	0	0	0	0	0	0.000470484	0	0	0	0	3
11126	TGCAGCCCACTGGGGGCTAGTGCAGAAACGCTGTATTTT	0	0	0	0	0	0.00213994	0	0	0	0	3
11135	TGCAGCCCGGGACTGGGGGGTAACCAAGACACCCAGTACTTT	0	0	0	0	0	0.00327821	0	0	0	0	3
11250	TGCAGCGCAGAGGGGGGTCAAAACACCTTGTACTTT	0	0	0	0	0	0.00145698	0	0	0	0	3
11252	TGCAGCGCAGATCAGGGTGAGCAGTACTTC	0	0	0	0	0	0.00145698	0	0	0	0	3
11254	TGCAGCGCAGATCCCTGGGGAACTGGTGCAGAAACGCTGTATTTT	0	0	0	0	0	0.00063743	0	0	0	0	3
11260	TGCAGCGCAGATCTGGGGGGGTCCTATGCTGAGCAGCTCTTC	0	0	0	0	0	0.000242831	0	0	0	0	3
11274	TGCAGCGCAGGGGACCTTAGTGCAGAAACGCTGTATTTT	0	0	0	0	0	0.00248901	0	0	0	0	3
11299	TGCAGCGCTTCTAGTCAAAACACCTTGTACTTT	0	0	0	0	0	0.00101685	0	0	0	0	3
11329	TGCAGGAGGACTGGGGGCTCCTACGAGCAGTACTTC	0	0	0	0	0	0.0026256	0	0	0	0	3
11333	TGCAGGCAGAGGGGGCACGGCTCCGACTACACCTTC	0	0	0	0	0	0.0423284	0	0	0	0	3
11336	TGCAGGCAGGGGTCTGGAAATACGCTCTATTTT	0	0	0	0	0	0.444167	0	0	0	0	3
11357	TGCAGGCGGGGGGGGAGGCAAAACACCTTGTACTTT	0	0	0	0	0	7.58845e-05	0	0	0	0	3
11358	TGCAGGCGGGGGGGGCCCAACGAAAGATTATTT	0	0	0	0	0	0.0475492	0	0	0	0	3
11366	TGCAGGGACAGTTCCTATAATTCGCCCCTCTACTTT	0	0	0	0	0	0.331873	0	0	0	0	3
11403	TGCAGGGGGACCGGGGGCTCCTATGAGCAGTACTTC	0	0	0	0	0	0.000470484	0	0	0	0	3
11425	TGCAGTACACAGGGGGAGCAGTACTTC	0	0	0	0	0	0.000242831	0	0	0	0	3
11439	TGCAGTACAGGGAACACAGAAGTCTTC	0	0	0	0	0	0.243893	0	0	0	0	3
11473	TGCAGTAGACAGGGGAGGGAGCAGTTC	0	0	0	0	0	0.0401733	0	0	0	0	3
11474	TGCAGTAGACAGGGGGCAAACTCCGACTACACCTTC	0	0	0	0	0	0.059539	0	0	0	0	3
11503	TGCAGTCCCCCGGGGGACTATGCTGAGCAGTTC	0	0	0	0	0	0.209745	0	0	0	0	3
11520	TGCAGTCCGGGACAGCTCAACGAAAGATTACTTTTC	0	0	0	0	0	0.000516015	0	0	0	0	3
11526	TGCAGTCCTCAGGGTTATAACAACCAGGCTCAGCATTTT	0	0	0	0	0	0.0327214	0	0	0	0	3
11537	TGCAGTCGGACTGGGGGGAAGGAAAACACCTTGTACTTT	0	0	0	0	0	0.000424953	0	0	0	0	3
11538	TGCAGTCGGACTGGGGGGAGTGCAGAAACGCTGTATTTT	0	0	0	0	0	0.000106238	0	0	0	0	3
11539	TGCAGTCGGACTGGGGGGTGGTATGCTGAGCAGTTC	0	0	0	0	0	0.000151769	0	0	0	0	3
11543	TGCAGTCTCGGAACATCAAACACAGAAGTCTTC	0	0	0	0	0	0.000227654	0	0	0	0	3
11544	TGCAGTCTCGGGACATCAAGCACAGAAGTCTTC	0	0	0	0	0	0.00203371	0	0	0	0	3
11590	TGCAGTGACCGGGACAACTATGCTGAGCAGTTC	0	0	0	0	0	0.0412053	0	0	0	0	3
11593	TGCAGTGACCGGGACCAACAGGCTCTGCATTTT	0	0	0	0	0	0.00136592	0	0	0	0	3
11596	TGCAGTGACCGGGTCCAGCAGGCTCAGCATTTT	0	0	0	0	0	0.000151769	0	0	0	0	3
11605	TGCAGTGAGACAGAAAGTCTCCAAAACACCTTGTACTTT	0	0	0	0	0	0.0509185	0	0	0	0	3
11626	TGCAGTGAGGACAATAACAACCAGGCTCAGCATTTT	0	0	0	0	0	0.337109	0	0	0	0	3
11627	TGCAGTGAGGACAATAACTATGCTGAGCAGTTC	0	0	0	0	0	0.000349069	0	0	0	0	3
11628	TGCAGTGAGGACAGATATGATTCGCCCCTCTACTTT	0	0	0	0	0	0.0402643	0	0	0	0	3
11638	TGCAGTGAGGCAGGGGATGATAATTCGCCCCTCTACTTT	0	0	0	0	0	0.0722117	0	0	0	0	3
11639	TGCAGTGAGGCAGGGGGGTGGTATGCTGAGCAGTTC	0	0	0	0	0	7.58845e-05	0	0	0	0	3
11645	TGCAGTGAGGGCAGATATAATTCGCCCCTCTACTTT	0	0	0	0	0	0.000288361	0	0	0	0	3
11662	TGCAGTGCAAAACAGGGGTCTGCGGAAACGCTGTATTTT	0	0	0	0	0	0.00409776	0	0	0	0	3
11664	TGCAGTGCAAACAGGGCCGCAAACACAGAAGTCTTC	0	0	0	0	0	0.0309457	0	0	0	0	3
11680	TGCAGTGCAAATCCGGGACAGGGAGGGGCTCAGCATTTT	0	0	0	0	0	0.0262409	0	0	0	0	3
11681	TGCAGTGCAAATTTTAACTATGCTGAGCAGTTC	0	0	0	0	0	0.0356657	0	0	0	0	3
11682	TGCAGTGCAACACAAGGGTCTGCAGAAACGCTGTATTTT	0	0	0	0	0	0.000121415	0	0	0	0	3
11688	TGCAGTGCAACAGAGTATGAGCAGTACTTC	0	0	0	0	0	0.000258007	0	0	0	0	3
11692	TGCAGTGCAACAGGGTATGAGCGGTACTTC	0	0	0	0	0	0.00113827	0	0	0	0	3
11721	TGCAGTGCAAGACTTAACACAGAAGTCTTC	0	0	0	0	0	0.0399911	0	0	0	0	3
11735	TGCAGTGCAAGGGACAGGGGCCAAGACACCCAGTACTTT	0	0	0	0	0	0.000136592	0	0	0	0	3
11739	TGCAGTGCAAGGGACTGGGGGTATGAACAGTACTTC	0	0	0	0	0	0.203871	0	0	0	0	3
11740	TGCAGTGCAAGGGACTGGGGGTATGCTGAGCAGTTC	0	0	0	0	0	9.10614e-05	0	0	0	0	3
11743	TGCAGTGCAAGGGCCAACGAAAGATTACTTTTC	0	0	0	0	0	0.00286844	0	0	0	0	3
11757	TGCAGTGCAAGTTCTGGAAATACGCTCTATTTT	0	0	0	0	0	0.429324	0	0	0	0	3
11774	TGCAGTGCACACAGGGGTTCCAACGAAAGATTATTT	0	0	0	0	0	0.0324938	0	0	0	0	3
11785	TGCAGTGCACAGGGGGAGCAGTACTTCGGTAGCCAAGAGAACTTCTCCCTCATTCTGGAGTTGGCTACCCCCTCTCAGACATCAGTGTACTTCTGTGCCAGCGGTGCCAACTCCGACTACACCTTC	0	0	0	0	0	9.10614e-05	0	0	0	0	3
11786	TGCAGTGCACAGGGGGAGCGGTACTTC	0	0	0	0	0	0.00227654	0	0	0	0	3
11801	TGCAGTGCACCCCACTCCTATGAGCAGTACTTC	0	0	0	0	0	0.173411	0	0	0	0	3
11808	TGCAGTGCACCGGGACACGAAATTTCCAACGAAAGATTATTT	0	0	0	0	0	0.381062	0	0	0	0	3
11811	TGCAGTGCACCGGGGCAAAACACCGGGCAGCTCTACTTT	0	0	0	0	0	0.00273184	0	0	0	0	3
11832	TGCAGTGCACGGCAAGCCTATGAACAGTACTTC	0	0	0	0	0	0.0726974	0	0	0	0	3
11849	TGCAGTGCACTTGGGGGGGCGCGTGAACAGTACTTC	0	0	0	0	0	0.446322	0	0	0	0	3
11856	TGCAGTGCAGAAAATTCTGGAAATACGTTC	0	0	0	0	0	0.00141145	0	0	0	0	3
11858	TGCAGTGCAGAAACAAACACCGGGCAGCTCTACTTTGGAAATACGCTCTATTTT	0	0	0	0	0	0.000758845	0	0	0	0	3
11871	TGCAGTGCAGAAAGGGACAGGGGTTTCTCCTATGAGCAGTTC	0	0	0	0	0	0.000667784	0	0	0	0	3
11879	TGCAGTGCAGAACAGTATAATTCGCCCCTCTACTTTGCGGCAGGCACCCAGTACTTT	0	0	0	0	0	0.0001973	0	0	0	0	3
11898	TGCAGTGCAGAAGCAGGGGCAAACACAGAAGTCTTC	0	0	0	0	0	0.0817276	0	0	0	0	3
11907	TGCAGTGCAGAAGGGACAGGGGGCACAGAAGTCTTC	0	0	0	0	0	0.00171499	0	0	0	0	3
11922	TGCAGTGCAGAATATGCTGAGCAGTTCTTCGGACCAGGGACACGACTCAACGAAAGATTATTT	0	0	0	0	0	0.0001973	0	0	0	0	3
11923	TGCAGTGCAGAATATGGGGGATATGCTGAGCAGTTC	0	0	0	0	0	0.0483233	0	0	0	0	3
11948	TGCAGTGCAGACAGATTTTCCAACGAAAGATTATTT	0	0	0	0	0	0.0434363	0	0	0	0	3
11960	TGCAGTGCAGACAGGGCAAACACAGAAGTCGTCTTT	0	0	0	0	0	0.000106238	0	0	0	0	3
11965	TGCAGTGCAGACAGGGCTGGCACAGAAGTCTTC	0	0	0	0	0	0.0390198	0	0	0	0	3
11974	TGCAGTGCAGACAGGGGGCTGGAGCAGTACTTC	0	0	0	0	0	0.138945	0	0	0	0	3
11980	TGCAGTGCAGACAGTCGACCCAACGAAAGATTATTT	0	0	0	0	0	0.0518898	0	0	0	0	3
11995	TGCAGTGCAGACCCAGGTGAGCAGTACTTC	0	0	0	0	0	0.00063743	0	0	0	0	3
11997	TGCAGTGCAGACCCGGGACACTCATATGAACAGTACTTC	0	0	0	0	0	0.0541512	0	0	0	0	3
12014	TGCAGTGCAGACCGGGACAAAAGCACCGGGCAGCTCTACTTT	0	0	0	0	0	0.00588864	0	0	0	0	3
12019	TGCAGTGCAGACCGGGGGAACTATGCCGAGCAGTTC	0	0	0	0	0	0.00267114	0	0	0	0	3
12028	TGCAGTGCAGACGACACCCGGTACTTT	0	0	0	0	0	0.000455307	0	0	0	0	3
12029	TGCAGTGCAGACGACTGGGGGGGCGCTGGCACCGGGCAGCTCTACTTT	0	0	0	0	0	0.447172	0	0	0	0	3
12043	TGCAGTGCAGACGGGAGCTCCTATGAGCAGTACTTC	0	0	0	0	0	0.446778	0	0	0	0	3
12045	TGCAGTGCAGACGGGCAGGGGACTAGTGCAGAAACGCTGTATTTT	0	0	0	0	0	0.807381	0	0	0	0	3
12046	TGCAGTGCAGACGGGCAGGGGACTAGTGCAGAAGTCTTC	0	0	0	0	0	0.000212477	0	0	0	0	3
12047	TGCAGTGCAGACGGGCAGGGGGACACCTTGTACTTT	0	0	0	0	0	0.000166946	0	0	0	0	3
12048	TGCAGTGCAGACGGGCAGGGGGATGAGCAGTACTTC	0	0	0	0	0	7.58845e-05	0	0	0	0	3
12053	TGCAGTGCAGACGGGGGGGCCGGTGCTGAGCAGTTC	0	0	0	0	0	7.58845e-05	0	0	0	0	3
12058	TGCAGTGCAGACGTGGGCCGGACCGGGCAGTACTTC	0	0	0	0	0	7.58845e-05	0	0	0	0	3
12059	TGCAGTGCAGACGTGGGCCGGGCCGGGCAGCTCTACTTT	0	0	0	0	0	0.00286844	0	0	0	0	3
12106	TGCAGTGCAGACTGGGGGTCCTATGCTGAGCAGTTC	0	0	0	0	0	0.151041	0	0	0	0	3
12120	TGCAGTGCAGAGACAGGGGTGGGCGAAAGATTATTT	0	0	0	0	0	0.0525425	0	0	0	0	3
12123	TGCAGTGCAGAGACTGGGGGCCAAGACACAGAAGTCTTC	0	0	0	0	0	0.000273184	0	0	0	0	3
12124	TGCAGTGCAGAGACTGGGGGCCAAGACACCCAGTACTTT	0	0	0	0	0	0.32776	0	0	0	0	3
12154	TGCAGTGCAGAGGCAGATCCAAACACAGAAGTCTTC	0	0	0	0	0	0.00409776	0	0	0	0	3
12171	TGCAGTGCAGAGGGACAGGGGAATGCAGAAGTCTTC	0	0	0	0	0	0.000136592	0	0	0	0	3
12173	TGCAGTGCAGAGGGACTGGGGAACACCGGGCAGCTCTACTTT	0	0	0	0	0	0.173351	0	0	0	0	3
12174	TGCAGTGCAGAGGGACTGGGGGCCAACGAAAGATTATTT	0	0	0	0	0	7.58845e-05	0	0	0	0	3
12175	TGCAGTGCAGAGGGACTGGGGGCCTATGAGCAGTACTTC	0	0	0	0	0	0.00476555	0	0	0	0	3
12196	TGCAGTGCAGAGGGGGGAAACTCCGACTACACCTTC	0	0	0	0	0	0.000258007	0	0	0	0	3
12200	TGCAGTGCAGAGGGGGTTGGAAATACGCTCTATTTT	0	0	0	0	0	9.10614e-05	0	0	0	0	3
12206	TGCAGTGCAGAGTGGGACGCAAACACAGAAGTCTTC	0	0	0	0	0	0.000424953	0	0	0	0	3
12207	TGCAGTGCAGAGTGGGACGCAAACACCGGGCAGCTCTACTTT	0	0	0	0	0	0.371455	0	0	0	0	3
12208	TGCAGTGCAGATAAACTGGGGAGTAACCATGCTGAGCAGTTC	0	0	0	0	0	0.000652607	0	0	0	0	3
12225	TGCAGTGCAGATACAGGGGTCGGGCAGTACTTC	0	0	0	0	0	0.0619218	0	0	0	0	3
12232	TGCAGTGCAGATACGAAGGTCTTC	0	0	0	0	0	0.00100168	0	0	0	0	3
12242	TGCAGTGCAGATAGCGACAGGGTAGGGAATTATGCTGAGCAGTTC	0	0	0	0	0	0.0001973	0	0	0	0	3
12243	TGCAGTGCAGATAGCGACAGGGTAGGGAATTCGCCCCTCTACTTT	0	0	0	0	0	0.332389	0	0	0	0	3
12258	TGCAGTGCAGATAGGGGACAGGGGGCAGAAACGCTGTATTTT	0	0	0	0	0	0.215907	0	0	0	0	3
12264	TGCAGTGCAGATAGGTGGGGGGGTGAGCCGTACTTC	0	0	0	0	0	7.58845e-05	0	0	0	0	3
12266	TGCAGTGCAGATAGTGGTCAAAACACCTTGTACTTT	0	0	0	0	0	0.107483	0	0	0	0	3
12274	TGCAGTGCAGATATGGGACTGGCCTTT	0	0	0	0	0	9.10614e-05	0	0	0	0	3
12275	TGCAGTGCAGATATGGGACTGGGGACAGAGACGCTGTGTTTT	0	0	0	0	0	0.000303538	0	0	0	0	3
12286	TGCAGTGCAGATATTGGGGCAGGGAGTGCAGAAACGCTGTATTTT	0	0	0	0	0	0.00362728	0	0	0	0	3
12300	TGCAGTGCAGATCACAGGGGAGGAGACACCCAGTACTTT	0	0	0	0	0	0.0932014	0	0	0	0	3
12331	TGCAGTGCAGATCAGGGGGCTGAGCAGTACTACACCTTC	0	0	0	0	0	0.000409776	0	0	0	0	3
12353	TGCAGTGCAGATCCATATAACAACCAGGCTCAGCATTTT	0	0	0	0	0	0.0501293	0	0	0	0	3
12367	TGCAGTGCAGATCCCAGGGGGGATAATTCGCCCCTCTACTTT	0	0	0	0	0	0.0537262	0	0	0	0	3
12372	TGCAGTGCAGATCCCCGGACAGCAAACACAGAAGTCTTC	0	0	0	0	0	0.0281076	0	0	0	0	3
12374	TGCAGTGCAGATCCCCTTTCCTATAATTCGCCCCTCTACTTT	0	0	0	0	0	0.0731072	0	0	0	0	3
12382	TGCAGTGCAGATCCCTGGGGAACTAGTGCAGAAGCGCCGCATTTT	0	0	0	0	0	7.58845e-05	0	0	0	0	3
12383	TGCAGTGCAGATCCCTGGGGAACTAGTGCGGAAACACTGTATTTT	0	0	0	0	0	0.000349069	0	0	0	0	3
12384	TGCAGTGCAGATCCCTGGGGGGGTGCAGACACCTTC	0	0	0	0	0	7.58845e-05	0	0	0	0	3
12385	TGCAGTGCAGATCCCTGGGGGTTAGAGCAGTACTTC	0	0	0	0	0	7.58845e-05	0	0	0	0	3
12386	TGCAGTGCAGATCCCTGGGGTCAAGACACCCAGTACTTT	0	0	0	0	0	0.045895	0	0	0	0	3
12388	TGCAGTGCAGATCCGAGGGGGGAGGCTCCGCTTTTT	0	0	0	0	0	0.0485357	0	0	0	0	3
12389	TGCAGTGCAGATCCGAGGGGGGGCGGCGGGCAGCTCTACTTT	0	0	0	0	0	0.000136592	0	0	0	0	3
12404	TGCAGTGCAGATCCGGGACAGAACTATGCTGAGCAGTTC	0	0	0	0	0	0.000151769	0	0	0	0	3
12405	TGCAGTGCAGATCCGGGACAGGGAGGCACAGAGGTCTTC	0	0	0	0	0	0.00185158	0	0	0	0	3
12414	TGCAGTGCAGATCCGGGGGACGAAAGATTATTT	0	0	0	0	0	0.0690853	0	0	0	0	3
12421	TGCAGTGCAGATCCGGGGGGGCGAGGGGAGCAGTACTTC	0	0	0	0	0	0.396406	0	0	0	0	3
12425	TGCAGTGCAGATCCGGGGGGGGGCTATGAGCAGTACTTC	0	0	0	0	0	7.58845e-05	0	0	0	0	3
12439	TGCAGTGCAGATCCTGGGGGGGCGCATGCAGAAACGCTGTATTTT	0	0	0	0	0	0.187374	0	0	0	0	3
12440	TGCAGTGCAGATCCTGGGGGGGCGCATGCAGAAGTCTTC	0	0	0	0	0	9.10614e-05	0	0	0	0	3
12441	TGCAGTGCAGATCCTGGGGGGGCGCGTGAGCAGTACTTC	0	0	0	0	0	0.000258007	0	0	0	0	3
12454	TGCAGTGCAGATCGCAGGAATAGTGCAGAAACGCTGTATTTT	0	0	0	0	0	0.379969	0	0	0	0	3
12455	TGCAGTGCAGATCGCAGGAATAGTGCAGAAGTCTTC	0	0	0	0	0	0.000182123	0	0	0	0	3
12461	TGCAGTGCAGATCGCAGGTCCTATGAGCAGTACTTC	0	0	0	0	0	0.204934	0	0	0	0	3
12473	TGCAGTGCAGATCGGAGGGGGGGGGACACCCAGTACTTT	0	0	0	0	0	0.0887849	0	0	0	0	3
12483	TGCAGTGCAGATCGGGGACAGGGCGCAAACATAGAAGTCTTC	0	0	0	0	0	0.00106238	0	0	0	0	3
12484	TGCAGTGCAGATCGGGGATCCACCGGGCAGCTCTACTTTGGTGAAGGCTCAAAGCTGACAGTGCTGGAGGATCTGAGAAATGTGACTCCACCCAAGGTCTCCTATGAGCAGTACTTC	0	0	0	0	0	0.000212477	0	0	0	0	3
12494	TGCAGTGCAGATCGGGGGTTTGACACAGAAGTCTTC	0	0	0	0	0	0.000182123	0	0	0	0	3
12495	TGCAGTGCAGATCGGGGGTTTGACACCTTGTACTTT	0	0	0	0	0	0.272107	0	0	0	0	3
12496	TGCAGTGCAGATCGGTACTGGGGGGCTGAGCAGTACTTC	0	0	0	0	0	0.00783128	0	0	0	0	3
12499	TGCAGTGCAGATCGTGGACCCTCAAACACCGGGCAGCTCTACTTT	0	0	0	0	0	0.152422	0	0	0	0	3
12509	TGCAGTGCAGATCTCCTGGGGGCGTATGAACAGTACTTC	0	0	0	0	0	0.0695102	0	0	0	0	3
12510	TGCAGTGCAGATCTCCTGGGGGGGGACACCCAGTACTTT	0	0	0	0	0	7.58845e-05	0	0	0	0	3
12511	TGCAGTGCAGATCTCCTGGGGGTCTATGCTGAGCAGTTC	0	0	0	0	0	0.0624681	0	0	0	0	3
12519	TGCAGTGCAGATCTCTGGGGGGGCGATAACACAAAAGTCTTC	0	0	0	0	0	7.58845e-05	0	0	0	0	3
12520	TGCAGTGCAGATCTCTGGGGGGGCGATAACACCTTGTACTTT	0	0	0	0	0	0.0678863	0	0	0	0	3
12522	TGCAGTGCAGATCTGACAGGGCCCTCCTATGAACAGTACTTC	0	0	0	0	0	0.210671	0	0	0	0	3
12525	TGCAGTGCAGATCTGGACAAATCCTATGGGCAGTACTTC	0	0	0	0	0	0.00305056	0	0	0	0	3
12526	TGCAGTGCAGATCTGGACAAGGGGGACACCCAGTACTTT	0	0	0	0	0	0.0519202	0	0	0	0	3
12527	TGCAGTGCAGATCTGGACAAGGGGGGGCGCGAACAGTACTTC	0	0	0	0	0	9.10614e-05	0	0	0	0	3
12547	TGCAGTGCAGATCTGGGGGCTAACAACCAGGCTCCGCCTTTT	0	0	0	0	0	0.0021703	0	0	0	0	3
12550	TGCAGTGCAGATCTGGGGGGGCAAGACACCCAGTACTTT	0	0	0	0	0	0.0001973	0	0	0	0	3
12552	TGCAGTGCAGATCTGGGGGGGGCGGACACCGGGCAGCTCTACTTT	0	0	0	0	0	0.000470484	0	0	0	0	3
12572	TGCAGTGCAGATGACTGGGGGGAAAACACCTTGTACTTT	0	0	0	0	0	0.000106238	0	0	0	0	3
12574	TGCAGTGCAGATGACTGGGGGGCCTATGAGCAGTACTTC	0	0	0	0	0	0.172303	0	0	0	0	3
12579	TGCAGTGCAGATGAGGGCCGGACCGGGCAGCTCTACTTT	0	0	0	0	0	0.000318715	0	0	0	0	3
12583	TGCAGTGCAGATGAGGGGGGCTATGCTGAGCAGTTC	0	0	0	0	0	9.10614e-05	0	0	0	0	3
12584	TGCAGTGCAGATGAGGGGGGGGCCGTGAACACCCAGTACTTT	0	0	0	0	0	0.157688	0	0	0	0	3
12648	TGCAGTGCAGATGGGGACTGGGGGGGGCAGCACTTC	0	0	0	0	0	0.00336927	0	0	0	0	3
12656	TGCAGTGCAGATGGGGGACTGGGATATGAGCAGTACTTC	0	0	0	0	0	0.0650786	0	0	0	0	3
12661	TGCAGTGCAGATGGGGGCCTGGGGGGGCGCGAACAGTACTTC	0	0	0	0	0	0.140311	0	0	0	0	3
12673	TGCAGTGCAGATGGGGGGTGGTATGCTGAGCAGTTC	0	0	0	0	0	0.0143877	0	0	0	0	3
12679	TGCAGTGCAGATGGTGGGGGATCCTATGAACAGTACTTC	0	0	0	0	0	0.0620584	0	0	0	0	3
12682	TGCAGTGCAGATGTACAGGCAAACACAGAAGTCTTC	0	0	0	0	0	0.436973	0	0	0	0	3
12713	TGCAGTGCAGATTGGACAGTCAACGAAAGATTATTT	0	0	0	0	0	0.000106238	0	0	0	0	3
12737	TGCAGTGCAGATTGGGGTGACGAACAGTACTTC	0	0	0	0	0	0.0323723	0	0	0	0	3
12747	TGCAGTGCAGATTTAGGGGCAGGAGGTGCTGAGCAGTTC	0	0	0	0	0	0.00166946	0	0	0	0	3
12748	TGCAGTGCAGATTTCAACGACTATGCTGAGCAGTTC	0	0	0	0	0	0.0001973	0	0	0	0	3
12749	TGCAGTGCAGATTTCAATAGCTACGCTGAGCAGTTC	0	0	0	0	0	0.000182123	0	0	0	0	3
12750	TGCAGTGCAGATTTCTGGGGGGGATATGAGCAGTACTTC	0	0	0	0	0	0.218381	0	0	0	0	3
12768	TGCAGTGCAGCACTGGGGGAAAACACAGAAGTCTTC	0	0	0	0	0	0.000182123	0	0	0	0	3
12769	TGCAGTGCAGCACTGGGGGAAAACACCTTGTACTTT	0	0	0	0	0	0.0426168	0	0	0	0	3
12801	TGCAGTGCAGCCAGTAACTATGCTGAGCAGTTC	0	0	0	0	0	0.685374	0	0	0	0	3
12804	TGCAGTGCAGCCCAGGGGTGGTATGCTGAGCAGTTC	0	0	0	0	0	0.000106238	0	0	0	0	3
12815	TGCAGTGCAGCCCTGGGGGATAACCAGGCTCCGCTTTTT	0	0	0	0	0	0.000121415	0	0	0	0	3
12828	TGCAGTGCAGCCGGGACAGGGGGTCAAAACACCTCGTACTTT	0	0	0	0	0	0.00496285	0	0	0	0	3
12829	TGCAGTGCAGCCGGGACAGGGGTGGACACCCAGTACTTT	0	0	0	0	0	0.0967376	0	0	0	0	3
12830	TGCAGTGCAGCCGGGACAGGGTCCTATGAACAGTACTTC	0	0	0	0	0	0.00288361	0	0	0	0	3
12835	TGCAGTGCAGCCGGGACTGGGGGGGCGCTGGTTGAGCAGTACTTC	0	0	0	0	0	0.282124	0	0	0	0	3
12837	TGCAGTGCAGCCGGGGGGAATTCGCCCCTCTACTTT	0	0	0	0	0	0.00270149	0	0	0	0	3
12854	TGCAGTGCAGCGGACAGGGACACCCACTCCTATGAGCAGTACTTC	0	0	0	0	0	0.000106238	0	0	0	0	3
12855	TGCAGTGCAGCGGACAGGGACACCGGGCAGCTCTACTTT	0	0	0	0	0	0.000106238	0	0	0	0	3
12873	TGCAGTGCAGCGGGGGCTCAAAACACAGAAGTCTTC	0	0	0	0	0	7.58845e-05	0	0	0	0	3
12874	TGCAGTGCAGCTAGGACAGAGGAGGACACCCAGTACTTT	0	0	0	0	0	0.000136592	0	0	0	0	3
12875	TGCAGTGCAGCTAGGACAGGGGGCGAAAGATTATTT	0	0	0	0	0	0.0629538	0	0	0	0	3
12908	TGCAGTGCAGGACAACAGGCTCAGCGTTTT	0	0	0	0	0	0.00248901	0	0	0	0	3
12919	TGCAGTGCAGGACAGGGGAACGGTTCGCCCCTCTACTTT	0	0	0	0	0	7.58845e-05	0	0	0	0	3
12935	TGCAGTGCAGGACGACAGGCAAACACAGAAGTCTTC	0	0	0	0	0	0.000273184	0	0	0	0	3
12955	TGCAGTGCAGGAGGGAGTGGAAATACGCTCTATTTT	0	0	0	0	0	0.0998489	0	0	0	0	3
12966	TGCAGTGCAGGATTGGGGGACACCGGGCAGCATTTT	0	0	0	0	0	7.58845e-05	0	0	0	0	3
12976	TGCAGTGCAGGCAGGGGCGAAAGATTATCTTTC	0	0	0	0	0	0.000166946	0	0	0	0	3
12997	TGCAGTGCAGGCTGGCCCCAAGACACCCAGTACTTT	0	0	0	0	0	0.0452879	0	0	0	0	3
12998	TGCAGTGCAGGCTGGGGGAACTATGCTGAGCAGTTC	0	0	0	0	0	0.00122933	0	0	0	0	3
13013	TGCAGTGCAGGGACACTCACAGGAGTCCTCTTT	0	0	0	0	0	0.000121415	0	0	0	0	3
13020	TGCAGTGCAGGGACAGGGGAGGACACAGAAGTCTTC	0	0	0	0	0	0.000971322	0	0	0	0	3
13021	TGCAGTGCAGGGACAGGGGAGGACACCCCGTACTTT	0	0	0	0	0	0.000136592	0	0	0	0	3
13023	TGCAGTGCAGGGACAGGGGCGGGTGCAGAAACGCTGTATTTT	0	0	0	0	0	0.493432	0	0	0	0	3
13024	TGCAGTGCAGGGACAGGGGCGGGTGCAGAAGTCTTC	0	0	0	0	0	0.000303538	0	0	0	0	3
13028	TGCAGTGCAGGGACAGGGTGGGAATCGCCCCTCTACTTC	0	0	0	0	0	0.00731527	0	0	0	0	3
13078	TGCAGTGCAGGGGACAGGGGCGAAAGATTATTT	0	0	0	0	0	0.000166946	0	0	0	0	3
13086	TGCAGTGCAGGGGACTGGGGGAGTGCAGAAACGCTGTATTTT	0	0	0	0	0	0.340023	0	0	0	0	3
13087	TGCAGTGCAGGGGACTGGGGGAGTGCAGAAGTCTTC	0	0	0	0	0	0.000364246	0	0	0	0	3
13088	TGCAGTGCAGGGGACTGGGGGAGTGCAGAGCAGTTC	0	0	0	0	0	7.58845e-05	0	0	0	0	3
13091	TGCAGTGCAGGGGACTGGGGGGGCGCGGGAGACACCCAGTACTTT	0	0	0	0	0	0.0432845	0	0	0	0	3
13140	TGCAGTGCAGGGGGCGGCACAGAAGTCTGCTTT	0	0	0	0	0	0.000151769	0	0	0	0	3
13141	TGCAGTGCAGGGGGCGGCACAGCAAACACAGAAGTCTTC	0	0	0	0	0	0.000106238	0	0	0	0	3
13148	TGCAGTGCAGGGGGGAGGCAAAACACAGAAGTCTTC	0	0	0	0	0	0.00133557	0	0	0	0	3
13149	TGCAGTGCAGGGGGGAGGCAAAACACCTTGTACTTT	0	0	0	0	0	1.5453	0	0	0	0	3
13169	TGCAGTGCAGGGGGGGGCAACCAGGCTCAGCATTTT	0	0	0	0	0	0.0485661	0	0	0	0	3
13171	TGCAGTGCAGGGGGGGGCACCGGGCGGCTCTACTTT	0	0	0	0	0	0.00144181	0	0	0	0	3
13175	TGCAGTGCAGGGGGGGGGCAAAGCACTTTGTACTTT	0	0	0	0	0	7.58845e-05	0	0	0	0	3
13176	TGCAGTGCAGGGGGGGGGCGGCAAAACACCTTGTTC	0	0	0	0	0	0.000106238	0	0	0	0	3
13189	TGCAGTGCAGGGGTGGGGGACTATGCTGAGCAGTTC	0	0	0	0	0	0.000409776	0	0	0	0	3
13190	TGCAGTGCAGGGGTGGGGGCGCGTGAACAGTACTTC	0	0	0	0	0	0.000106238	0	0	0	0	3
13191	TGCAGTGCAGGGGTGGGGGCTAGTCAAGACACCCAGTACTTT	0	0	0	0	0	0.000151769	0	0	0	0	3
13229	TGCAGTGCAGGTGGGGGTGCAGAACAGCTGTATTTT	0	0	0	0	0	7.58845e-05	0	0	0	0	3
13244	TGCAGTGCAGTAGACTGGGGGCTAGAGCAGTACTTC	0	0	0	0	0	0.00362728	0	0	0	0	3
13257	TGCAGTGCAGTCAAGGAGAAGGAAAACACCTTGTACTTT	0	0	0	0	0	7.58845e-05	0	0	0	0	3
13266	TGCAGTGCAGTCAGATATGCTGAGCAGCTCTTC	0	0	0	0	0	0.00365763	0	0	0	0	3
13269	TGCAGTGCAGTCAGGGGGAAGGAAAACACCTCGTACTTT	0	0	0	0	0	0.00563063	0	0	0	0	3
13270	TGCAGTGCAGTCAGGGGGGTTGAGCAGTACTTC	0	0	0	0	0	0.000151769	0	0	0	0	3
13271	TGCAGTGCAGTCCAGCCTGGAAATACGCTCTATTTT	0	0	0	0	0	7.58845e-05	0	0	0	0	3
13288	TGCAGTGCAGTCGGGGCTGGAGATACGCTCTATTTT	0	0	0	0	0	0.0013811	0	0	0	0	3
13295	TGCAGTGCAGTCGGGGGGGTCTATGGGCAGTACTTC	0	0	0	0	0	0.00189711	0	0	0	0	3
13321	TGCAGTGCAGTGGGACAGGGGAATGCGGAAACGCTGTATTTT	0	0	0	0	0	0.000121415	0	0	0	0	3
13322	TGCAGTGCAGTGGGACAGGGGGGCACAGAAACGCTGTATTTT	0	0	0	0	0	0.000273184	0	0	0	0	3
13323	TGCAGTGCAGTGGGACAGGGGGGCACAGAAGTCTTC	0	0	0	0	0	0.371956	0	0	0	0	3
13324	TGCAGTGCAGTGGGACAGGGGGGCACCGGGCAGCTCTACTTT	0	0	0	0	0	0.000166946	0	0	0	0	3
13325	TGCAGTGCAGTGGGCTCCTATGAGCAGTACTTCGGTCCTGGCACCAGGCTGGGGGGGTATGAACAGTACTTC	0	0	0	0	0	0.000151769	0	0	0	0	3
13326	TGCAGTGCAGTGGGGCAGGCCCCCTATGAGCAGTACTTC	0	0	0	0	0	0.00456825	0	0	0	0	3
13328	TGCAGTGCAGTGGGGGAGGTCTTC	0	0	0	0	0	0.000546369	0	0	0	0	3
13331	TGCAGTGCAGTGGGGGCTCAAAACACCTTGTACTTT	0	0	0	0	0	0.395374	0	0	0	0	3
13357	TGCAGTGCAGTTCGGGACAGGGGGGTTGGGAATACGCTCTATTTT	0	0	0	0	0	0.00339963	0	0	0	0	3
13358	TGCAGTGCAGTTGCAATTTCCAACGAAAGATTATTT	0	0	0	0	0	0.0694343	0	0	0	0	3
13406	TGCAGTGCATTGGGTGGGGCTGAGCAGTTC	0	0	0	0	0	0.0244652	0	0	0	0	3
13435	TGCAGTGCCACTGGGGTGTCCTATGAGCAGTACTTC	0	0	0	0	0	0.0578999	0	0	0	0	3
13437	TGCAGTGCCAGAATTTCCAACGAAAGATTATCTTTC	0	0	0	0	0	0.00601006	0	0	0	0	3
13443	TGCAGTGCCAGGACTGGGGGCTATGCTGAGCAGTTC	0	0	0	0	0	0.141479	0	0	0	0	3
13452	TGCAGTGCCAGGGGAGGCACAGAAGTCCTCTTT	0	0	0	0	0	0.000804376	0	0	0	0	3
13459	TGCAGTGCCCAAATTTCCGGCGAAAGATTATTT	0	0	0	0	0	0.000151769	0	0	0	0	3
13475	TGCAGTGCCCCAGGGGGCGGCACCGGGCAGGGGACTAGTGCAGAAACGCTGTATTTT	0	0	0	0	0	0.000151769	0	0	0	0	3
13505	TGCAGTGCCCCGGGACAGATCTATGAGCAGTACTTC	0	0	0	0	0	0.0510855	0	0	0	0	3
13506	TGCAGTGCCCCGGGACAGGAAAACACCTTGTACTTT	0	0	0	0	0	0.150509	0	0	0	0	3
13508	TGCAGTGCCCCGGGACTGGCCTTT	0	0	0	0	0	0.101427	0	0	0	0	3
13532	TGCAGTGCCCGCGGATATGATTCGCCCCTCTACTTT	0	0	0	0	0	0.000166946	0	0	0	0	3
13545	TGCAGTGCCCGGGACAACTATAATTCGCCCCTCTACTTT	0	0	0	0	0	0.17373	0	0	0	0	3
13548	TGCAGTGCCCGGGACAGAGAAGTCTTC	0	0	0	0	0	0.00159358	0	0	0	0	3
13561	TGCAGTGCCCGGGACCGGGGGGGCGCCCGGCAAGACACCCAGTACTTT	0	0	0	0	0	0.00749739	0	0	0	0	3
13562	TGCAGTGCCCGGGAGAGGAGCACCTTGTACTTT	0	0	0	0	0	0.0032175	0	0	0	0	3
13563	TGCAGTGCCCGGGATAACAACCAGGCAAACACAGAAGTCTTC	0	0	0	0	0	0.000106238	0	0	0	0	3
13564	TGCAGTGCCCGGGATAACAACCAGGCTCCGCTTTTT	0	0	0	0	0	0.294311	0	0	0	0	3
13575	TGCAGTGCCCTCCGGGACAGGGGTGCAGAAGCGCTGTATTTT	0	0	0	0	0	0.00402188	0	0	0	0	3
13594	TGCAGTGCCGATACGAAAGTCTTC	0	0	0	0	0	0.00121415	0	0	0	0	3
13612	TGCAGTGCCGGACAGAACCATGCTGAGCAGTTC	0	0	0	0	0	0.0017757	0	0	0	0	3
13613	TGCAGTGCCGGACAGGGGGCCAACCAGGCTCCGCTTTTT	0	0	0	0	0	0.0244348	0	0	0	0	3
13632	TGCAGTGCCGGGACAGGCTCCTATGAGCAGTACTTC	0	0	0	0	0	0.000106238	0	0	0	0	3
13642	TGCAGTGCCGGGACAGGGGCTGAGCAGTTC	0	0	0	0	0	0.0999248	0	0	0	0	3
13690	TGCAGTGCCTACAGGGAAAACACCTTGTACTTT	0	0	0	0	0	0.000106238	0	0	0	0	3
13691	TGCAGTGCCTACGGGGAAAACACAGAAGTCTTC	0	0	0	0	0	0.00288361	0	0	0	0	3
13693	TGCAGTGCCTCAAATAACAACCAGGCTCCGCTTTTT	0	0	0	0	0	0.000166946	0	0	0	0	3
13694	TGCAGTGCCTCAAATAACTATGCTGAGCAGTTC	0	0	0	0	0	0.396603	0	0	0	0	3
13698	TGCAGTGCCTCAGGGGAGGGCACAGAAGTCTTC	0	0	0	0	0	0.0619521	0	0	0	0	3
13720	TGCAGTGCCTGGGACAGCTATGAGCAGTACTTC	0	0	0	0	0	0.000242831	0	0	0	0	3
13758	TGCAGTGCGACTGGGGGGAACTATGCTGAGCAGTTC	0	0	0	0	0	0.131341	0	0	0	0	3
13784	TGCAGTGCGCACAGGACAAACACCGGGCAGCTCTACTTT	0	0	0	0	0	0.000865084	0	0	0	0	3
13858	TGCAGTGCGGACAGGGTTGGACAGTACTTC	0	0	0	0	0	0.00185158	0	0	0	0	3
13884	TGCAGTGCGGAGAGGGCAGCAAACACAGAAGTCTTC	0	0	0	0	0	7.58845e-05	0	0	0	0	3
13889	TGCAGTGCGGAGGGAAACACAGGAGTCTTC	0	0	0	0	0	0.0208682	0	0	0	0	3
13891	TGCAGTGCGGAGGGACCGGGGGCCTATGAACAGTACTTC	0	0	0	0	0	0.000121415	0	0	0	0	3
13898	TGCAGTGCGGATAGGTGGGGGGATGAGCAGTACTTC	0	0	0	0	0	0.00427989	0	0	0	0	3
13904	TGCAGTGCGGATCACAACTCCTATGAACAGTACTTC	0	0	0	0	0	0.0030202	0	0	0	0	3
13910	TGCAGTGCGGATCGCAGGAACTATGCTGAGCAGTTC	0	0	0	0	0	9.10614e-05	0	0	0	0	3
13917	TGCAGTGCGGATCTGGGGGGGGCGGACACCCAGTACTTT	0	0	0	0	0	0.00274702	0	0	0	0	3
13919	TGCAGTGCGGATCTTCTGAGCTCCTATGAGCAGTACTTC	0	0	0	0	0	0.00317197	0	0	0	0	3
13928	TGCAGTGCGGATGGGGCTATTTCCAACGAAAGATTATTTTTCGGTCATGGAACCAAGCTGTCTGTCCTGGGATTGCGGCTTTCCTATAATTCGCCCCTCTACTTT	0	0	0	0	0	0.000288361	0	0	0	0	3
13948	TGCAGTGCGGCCGGGACAGGGGGAACCGGGCAGCTCTACTTT	0	0	0	0	0	9.10614e-05	0	0	0	0	3
13949	TGCAGTGCGGCCGGGACAGGGTCTGGTGAGCAGTACTTC	0	0	0	0	0	0.0719385	0	0	0	0	3
13958	TGCAGTGCGGGAAGGGAAGGCACCCAGTACTTT	0	0	0	0	0	0.00264078	0	0	0	0	3
13963	TGCAGTGCGGGACAGAACTCCGACTACACCTTC	0	0	0	0	0	0.11026	0	0	0	0	3
13966	TGCAGTGCGGGACAGGGCACAGAAGTCCTCTTT	0	0	0	0	0	0.00212477	0	0	0	0	3
13967	TGCAGTGCGGGACAGGGCGCCAACGAAAGATTATTT	0	0	0	0	0	0.104842	0	0	0	0	3
13989	TGCAGTGCGGGACTGGGGAGGAATGCTGAGCAGTCCTTC	0	0	0	0	0	0.000591899	0	0	0	0	3
13990	TGCAGTGCGGGACTGGGGGGCTATGCTGAGCAGTTC	0	0	0	0	0	0.000106238	0	0	0	0	3
13995	TGCAGTGCGGGAGAACAGTACTTC	0	0	0	0	0	0.353258	0	0	0	0	3
14015	TGCAGTGCGGGGACACTCACAGAAGTCTTC	0	0	0	0	0	0.0025649	0	0	0	0	3
14022	TGCAGTGCGGGGACAGGGTCCCAAGACACCCAGTACTTT	0	0	0	0	0	0.0978	0	0	0	0	3
14032	TGCAGTGCGGGGGACTGGGGGAGTCAAAACACCTTGTACTTT	0	0	0	0	0	0.00478073	0	0	0	0	3
14051	TGCAGTGCGGGGGGGCGGGAGCAGCACTTC	0	0	0	0	0	0.000379423	0	0	0	0	3
14072	TGCAGTGCGGTCAGGGGGAAGGAAGACACCTTGTACTTT	0	0	0	0	0	9.10614e-05	0	0	0	0	3
14074	TGCAGTGCGGTGGGGGAAGTCTTC	0	0	0	0	0	0.000333892	0	0	0	0	3
14091	TGCAGTGCGTCGGGACAACACCAGGCTCAGCATTTT	0	0	0	0	0	0.0591748	0	0	0	0	3
14100	TGCAGTGCGTGGGGGGCAAACTCCGACTACACCTTC	0	0	0	0	0	7.58845e-05	0	0	0	0	3
14121	TGCAGTGCTCCAGACTGGGGGACCGGGCAGCTCTACTTT	0	0	0	0	0	0.0583856	0	0	0	0	3
14136	TGCAGTGCTCCGGGACAACAAGACACCCAGTACTTT	0	0	0	0	0	0.137852	0	0	0	0	3
14137	TGCAGTGCTCCGGGACAGAACTATGCTGAGCAGTCCTTC	0	0	0	0	0	0.0036121	0	0	0	0	3
14184	TGCAGTGCTGACTGGGGGGAGGAAAACACCTTGTACTTT	0	0	0	0	0	7.58845e-05	0	0	0	0	3
14185	TGCAGTGCTGACTGGGGGGGCGAAAGATTATTT	0	0	0	0	0	9.10614e-05	0	0	0	0	3
14187	TGCAGTGCTGAGGGAGAGGGGAATGCAGAAACGCTGTATTTT	0	0	0	0	0	0.000151769	0	0	0	0	3
14192	TGCAGTGCTGCCGGGACAGACTCCTATGAGAAGTACTTC	0	0	0	0	0	0.00044013	0	0	0	0	3
14203	TGCAGTGCTGGACTGGGGGGCTACTCCTATGGGCAGTACTTC	0	0	0	0	0	0.00544851	0	0	0	0	3
14210	TGCAGTGCTGGGCAGCATAATTCGCCCCTCTACTTT	0	0	0	0	0	0.565734	0	0	0	0	3
14211	TGCAGTGCTGGGGACTCCTCCTATGAGCAGTACTTC	0	0	0	0	0	0.000242831	0	0	0	0	3
14212	TGCAGTGCTGGGGCAGGGCACACAGAAGTCTTC	0	0	0	0	0	0.00212477	0	0	0	0	3
14217	TGCAGTGCTGGGGGGCCGGGGGACACCCAGTACTTT	0	0	0	0	0	0.0345123	0	0	0	0	3
14234	TGCAGTGCTTACAGCTCCTATGAGCAGTACTTCGGTCCTGGAAATACGCTCTATTTT	0	0	0	0	0	0.000182123	0	0	0	0	3
14236	TGCAGTGCTTCATCAAACTCCGACTACACCTTC	0	0	0	0	0	0.03732	0	0	0	0	3
14238	TGCAGTGCTTCCAGTCAAAACACCTTGTACTTT	0	0	0	0	0	0.000182123	0	0	0	0	3
14239	TGCAGTGCTTCCGGGACAAACCAGGCTCAGCATTTT	0	0	0	0	0	0.0646536	0	0	0	0	3
14247	TGCAGTGCTTCTAGTCGAAACACCTTGTACTTT	0	0	0	0	0	0.00218547	0	0	0	0	3
14252	TGCAGTGCTTGGGACAAATCCTATGAGCAGTACTTC	0	0	0	0	0	0.000227654	0	0	0	0	3
14272	TGCAGTGGACAGGGGGCGGGCACAGAAGTCTTC	0	0	0	0	0	0.187738	0	0	0	0	3
14273	TGCAGTGGACAGGGGGCGGGCACCGGGCAGCTCTACTTT	0	0	0	0	0	0.000136592	0	0	0	0	3
14295	TGCAGTGGACTGGGGGGAGGGGCCCAGTACTTT	0	0	0	0	0	0.0583704	0	0	0	0	3
14318	TGCAGTGGAGGGACAGGGGAATACGATGAACAGTACTTC	0	0	0	0	0	9.10614e-05	0	0	0	0	3
14319	TGCAGTGGAGGGACAGGGGCAAACACAGAAGTCTTC	0	0	0	0	0	9.10614e-05	0	0	0	0	3
14324	TGCAGTGGAGGGGCAGGGGGGTCTAGTCAAAACACCTTGTACTTT	0	0	0	0	0	0.00350587	0	0	0	0	3
14342	TGCAGTGGCCGGGACAGGGGAAGTGCAGAAACGCTGTATTTT	0	0	0	0	0	0.117348	0	0	0	0	3
14347	TGCAGTGGCCGGGACATCGCAGACACAGAAGTCTTC	0	0	0	0	0	0.245805	0	0	0	0	3
14349	TGCAGTGGCCGGGACTCCTCCTGTGAGCAGTACTTC	0	0	0	0	0	0.0021703	0	0	0	0	3
14370	TGCAGTGGCTGGGGCTCCTCCTATGAGCAGTACTTC	0	0	0	0	0	0.000121415	0	0	0	0	3
14393	TGCAGTGGGACAGGGGGAAACTCCGACTACACCTTC	0	0	0	0	0	0.0606014	0	0	0	0	3
14401	TGCAGTGGGACAGGGGGGGCGCGTGAACAGTACTTC	0	0	0	0	0	9.10614e-05	0	0	0	0	3
14406	TGCAGTGGGACAGGGGTGGGGGCTAGTCAAAACACCTTGTACTTT	0	0	0	0	0	0.000591899	0	0	0	0	3
14407	TGCAGTGGGACAGGGGTTGCTGAGCAGTTC	0	0	0	0	0	0.675554	0	0	0	0	3
14408	TGCAGTGGGACAGGGGTTGGAAATACGCTCTATTTT	0	0	0	0	0	0.000121415	0	0	0	0	3
14420	TGCAGTGGGACGGGACAGAGATATGAGCAGTACTTC	0	0	0	0	0	0.0457887	0	0	0	0	3
14425	TGCAGTGGGACTGGGGATGAACGGTACTTC	0	0	0	0	0	0.00127486	0	0	0	0	3
14445	TGCAGTGGGACTGGGGGTTTAAACACCGGGCAGCTCTACTTT	0	0	0	0	0	0.0764764	0	0	0	0	3
14446	TGCAGTGGGAGACAGAACACCGGGCAGCTCTACTTT	0	0	0	0	0	0.00141145	0	0	0	0	3
14475	TGCAGTGGGGACAGCTATGGGCAGTACTTC	0	0	0	0	0	0.00159358	0	0	0	0	3
14517	TGCAGTGGGGGACAAAACTATGCTGAGCAGTTC	0	0	0	0	0	0.425758	0	0	0	0	3
14525	TGCAGTGGGGGACAGGGCTCCTATGAGCAGTACTTC	0	0	0	0	0	0.525242	0	0	0	0	3
14531	TGCAGTGGGGGACCCAACCAAGACACCCAGTACTTT	0	0	0	0	0	0.0411294	0	0	0	0	3
14574	TGCAGTGGGGGGGTCAACCAAGACACCCAGTGCTTT	0	0	0	0	0	0.00251937	0	0	0	0	3
14582	TGCAGTGGTCCCGGGACTGGAAATACGCTCTATTTT	0	0	0	0	0	0.000106238	0	0	0	0	3
14583	TGCAGTGGTCCCGGGACTGGGGGTGAAGACACAGAAGTCTTC	0	0	0	0	0	0.000166946	0	0	0	0	3
14584	TGCAGTGGTCCCGGGACTGGGGGTGAAGACACCCAGTACTTT	0	0	0	0	0	0.0371227	0	0	0	0	3
14610	TGCAGTGTAGAACAGGGGCCTTATGAACAGTACTTC	0	0	0	0	0	0.00206406	0	0	0	0	3
14611	TGCAGTGTAGAAGGGACGGGGGGCAACACAGAAGTCTTC	0	0	0	0	0	9.10614e-05	0	0	0	0	3
14630	TGCAGTGTAGATCTAGACAAATCCTATGAGCAGTACTTC	0	0	0	0	0	7.58845e-05	0	0	0	0	3
14660	TGCAGTGTAGTCGGGGCTGGAAATACGCTCTATTTT	0	0	0	0	0	0.000804376	0	0	0	0	3
14669	TGCAGTGTCCAGGGAAACACCGGGCAGCTCTGCTTT	0	0	0	0	0	0.0026256	0	0	0	0	3
14678	TGCAGTGTCCGGGACGGAGAAGTCTTC	0	0	0	0	0	0.0137503	0	0	0	0	3
14706	TGCAGTGTGGACTGGGGGGGCTATGCTGAGCAGTTC	0	0	0	0	0	0.000227654	0	0	0	0	3
14711	TGCAGTGTGGGACAAAACAACCAGGCTCCGCTTTTT	0	0	0	0	0	0.0177418	0	0	0	0	3
14718	TGCAGTGTGGGGGACAATTCTGGAAATACGCTCTATTTT	0	0	0	0	0	0.0001973	0	0	0	0	3
14731	TGCAGTGTTGGGTACCAAGACACCCAGTACTTT	0	0	0	0	0	0.00182123	0	0	0	0	3
14744	TGCAGTTCCAGACTGGGGGGGTATGAACAGTACTTC	0	0	0	0	0	0.169056	0	0	0	0	3
14745	TGCAGTTCCAGACTGGGGGGGTATGCTGAGCAGTTC	0	0	0	0	0	0.000136592	0	0	0	0	3
14747	TGCAGTTCCCGGACTGTCCAAGACACCCAGTACTTT	0	0	0	0	0	0.0154956	0	0	0	0	3
14757	TGCAGTTCGAATGCTGAGCAGTTC	0	0	0	0	0	0.281957	0	0	0	0	3
14762	TGCAGTTCGGACTGGGGGAACTATGCTGAGCAGCTCTTC	0	0	0	0	0	0.00229171	0	0	0	0	3
14775	TGCAGTTGGACGGATTCTGGAAATACGCTCTATTTT	0	0	0	0	0	0.0392627	0	0	0	0	3
14776	TGCAGTTGGACGGGACAAAACACCGGGCAGCTCTACTTT	0	0	0	0	0	7.58845e-05	0	0	0	0	3
14791	TGCCGAGGGACAGGGGGTGGTGCAGAAACGCTGTATTTT	0	0	0	0	0	0.0001973	0	0	0	0	3
14795	TGCCGTGCAGATTTCAATAACTATGCTGAGAAGTTC	0	0	0	0	0	0.000136592	0	0	0	0	3
14815	TGCGCCAGCAGCCAAGAAGGCAGAAACACAGAAGTCTTC	0	0	0	0	0	0.00223101	0	0	0	0	3
14819	TGCGCCAGCAGCCAAGAGCCGGGGGCCTCCTATGAACAGTACTTC	0	0	0	0	0	0.00168464	0	0	0	0	3
14826	TGCGCCAGCAGCCAAGCTGGGGGGCTTGCAGAAACGCTGTATTTT	0	0	0	0	0	0.000212477	0	0	0	0	3
14827	TGCGCCAGCAGCCAAGGGACAACTAGTGCAGAAACGCTGTATTTT	0	0	0	0	0	0.00412812	0	0	0	0	3
14874	TGCGCCAGCGGTGTGGACACAGAAGTCTTC	0	0	0	0	0	0.00248901	0	0	0	0	3
14875	TGCGCCCGCAGTGCAGACAGTTCCTATAATTCGCCCCTCTACTTT	0	0	0	0	0	0.000333892	0	0	0	0	3
14884	TGCGCCTGGAGCCGGGACTGGGGGCCTGACCAAGACACCCAGTACTTT	0	0	0	0	0	0.00312644	0	0	0	0	3
14900	TGCGGGACAACAAACACAGAAGTCTTC	0	0	0	0	0	0.00244348	0	0	0	0	3
14936	TGCGGTGAAGTGGACTGGGGCTATGAACAGTACTTC	0	0	0	0	0	0.000485661	0	0	0	0	3
14949	TGCGGTGATGCGGGCACAGGGGGTAGTCAAAACACCTTGTACTTT	0	0	0	0	0	0.000895437	0	0	0	0	3
14967	TGCGGTGCAGAAGGGACTGGGAATAACCAAGACACCCAGTACTTT	0	0	0	0	0	0.00150251	0	0	0	0	3
14977	TGCGGTGCAGACGGGGGGGACTATGCTGAGCAGTTC	0	0	0	0	0	0.0109274	0	0	0	0	3
14980	TGCGGTGCAGAGGGGGGCACCGGGCAGCCCTACTTT	0	0	0	0	0	0.000106238	0	0	0	0	3
14987	TGCGGTGCAGATCCCTGGGGGGGTGCAGAGACGCTGTATTTT	0	0	0	0	0	0.000561546	0	0	0	0	3
15016	TGCGGTGCAGTACAGTCTGGAAATACGCTCTATTTT	0	0	0	0	0	0.00251937	0	0	0	0	3
15031	TGCGGTGCCGACTGGGGACAGGGCGCAAACACAGAAGTCTTC	0	0	0	0	0	0.00044013	0	0	0	0	3
15045	TGCGGTGCGGGTGGGGGTGCAGAAACGCTGTATTTT	0	0	0	0	0	9.10614e-05	0	0	0	0	3
15048	TGCGGTGCTGGGACTGGGGGGGCGCGTGAGCAGTACTTC	0	0	0	0	0	0.00251937	0	0	0	0	3
15049	TGCGGTGCTTGGGACACCCAGTACTTT	0	0	0	0	0	0.00103203	0	0	0	0	3
15074	TGCGGTGTGGACTGGGGAGAAACGCTGTATTTT	0	0	0	0	0	0.000819553	0	0	0	0	3
15076	TGCGGTGTTCAGGGGGACACCTTGTACTTT	0	0	0	0	0	0.00206406	0	0	0	0	3
15103	TGCTCCTACAGTGCAGATAACTATAATTCGCCCCTCTACTTT	0	0	0	0	0	0.000865084	0	0	0	0	3
15104	TGCTCCTGGGGGGGCTATGAGCAGTACTTC	0	0	0	0	0	0.0566706	0	0	0	0	3
15112	TGCTTCCGTGCCAGCAGTGCGGGACAGAACACAGAAGTCTTC	0	0	0	0	0	0.000258007	0	0	0	0	3
15124	TGTACCTGGAGTCTAGCTGGGGGGACCCAAGACACCCAGTACTTT	0	0	0	0	0	0.0041433	0	0	0	0	3
15132	TGTACTGCACCTGCAGTGCCACAGGGGAGCGGTTCGCCCCTCTACTTT	0	0	0	0	0	0.000121415	0	0	0	0	3
15168	TGTAGTGCGGAGGGAAGCACAGAAGTCTTC	0	0	0	0	0	7.58845e-05	0	0	0	0	3
15204	TGTAGTTCTAGAGAGGGCTGTGCTGAGCAGTTC	0	0	0	0	0	0.00632877	0	0	0	0	3
15213	TGTAGTTCTAGAGATCGCAAGTATGAGCAGTACTTC	0	0	0	0	0	0.0860379	0	0	0	0	3
15216	TGTAGTTCTAGAGATGGCCACCAAGACACCCAGTACTTT	0	0	0	0	0	0.0396421	0	0	0	0	3
15246	TGTAGTTCTAGCGTGGACAGGGGCTATGAACAGTACTTC	0	0	0	0	0	0.109881	0	0	0	0	3
15260	TGTAGTTCTAGGCTGGGGGGGCGCGGGACTGAGCAGTTC	0	0	0	0	0	0.277904	0	0	0	0	3
15261	TGTAGTTCTAGGCTGGGGGGGCGCTATGCTGAGCAGTTC	0	0	0	0	0	9.10614e-05	0	0	0	0	3
15280	TGTAGTTCTCCAGTCTTT	0	0	0	0	0	9.10614e-05	0	0	0	0	3
15283	TGTAGTTCTCGGGACAGGGACACCGGGCAGCTCTACTTT	0	0	0	0	0	0.22137	0	0	0	0	3
15284	TGTAGTTCTCTAGTCTATGCTGAGCAGTTC	0	0	0	0	0	0.00728492	0	0	0	0	3
15302	TGTAGTTCTTCGGGACAGACCTATGAGCAGTACTTC	0	0	0	0	0	0.186797	0	0	0	0	3
15304	TGTAGTTTTAGAGAGGGCTATGCTGAGCAGTTC	0	0	0	0	0	0.000121415	0	0	0	0	3
15351	TGTGCAAGCAGCGAGGGACTTGTGGAAGACACCCAGTACTTT	0	0	0	0	0	9.10614e-05	0	0	0	0	3
15363	TGTGCAAGCAGCTCCGGGACAGGGGAATATAACTATGCTGAGCAGTTC	0	0	0	0	0	0.00183641	0	0	0	0	3
15398	TGTGCAAGCAGCTTAGATGAGAGGGAGGCTCCGCTTTTT	0	0	0	0	0	0.00044013	0	0	0	0	3
15461	TGTGCAGAAAATTCTGGAAATACGCTCTATTTT	0	0	0	0	0	0.000318715	0	0	0	0	3
15489	TGTGCAGGCAGCCAAGACTGGGTCCAAGACACCCAGTACTTT	0	0	0	0	0	0.000273184	0	0	0	0	3
15496	TGTGCAGTACAAGGGACAGGGGCCTATGAACAGTACTTC	0	0	0	0	0	7.58845e-05	0	0	0	0	3
15516	TGTGCCAACAGCCCTTCGCCCCTCTACTTT	0	0	0	0	0	0.000136592	0	0	0	0	3
15527	TGTGCCAACGGTGGTGCGGGTAGTGCAGAAACGCTGTATTTT	0	0	0	0	0	0.00494767	0	0	0	0	3
15530	TGTGCCACCAGCCAAAGGATTAACCAAGACACCCAGTACTTT	0	0	0	0	0	0.000409776	0	0	0	0	3
15536	TGTGCCAGCAAAAGGGCAGGGAATGCAGAAACGCTGTATTTT	0	0	0	0	0	0.0195175	0	0	0	0	3
15537	TGTGCCAGCAAAAGGGCAGGGAATGCAGAAGTCTTC	0	0	0	0	0	0.000166946	0	0	0	0	3
15550	TGTGCCAGCAACCAAGACTGGGGTCAAGACACCCAGTACTTT	0	0	0	0	0	0.000576722	0	0	0	0	3
15554	TGTGCCAGCAACCCCGACTGGACTGAACAGTACTTC	0	0	0	0	0	0.000258007	0	0	0	0	3
15565	TGTGCCAGCAAGAGGAGGGGGCGAGAACAGTACTTC	0	0	0	0	0	0.10252	0	0	0	0	3
15576	TGTGCCAGCAATGATGGGCAAGACACCCAGTACTTT	0	0	0	0	0	7.58845e-05	0	0	0	0	3
15627	TGTGCCAGCAGAAACACAGAAGTCCTCTTT	0	0	0	0	0	0.00122933	0	0	0	0	3
15644	TGTGCCAGCAGAACGGGACAGAACTATGCTGAGCAGTTC	0	0	0	0	0	0.000212477	0	0	0	0	3
15645	TGTGCCAGCAGAACTGGGGGGTTCTTCCAAGACACCCAGTACTTT	0	0	0	0	0	7.58845e-05	0	0	0	0	3
15697	TGTGCCAGCAGAGGGAGCACAGGAGTCTCCTTT	0	0	0	0	0	0.000485661	0	0	0	0	3
15711	TGTGCCAGCAGCAACATAGACCAAGACACAGAAGTCTTC	0	0	0	0	0	0.000106238	0	0	0	0	3
15712	TGTGCCAGCAGCAACATAGACCAAGACACCCAGTACTTT	0	0	0	0	0	0.0251937	0	0	0	0	3
15717	TGTGCCAGCAGCAAGACTGGGAGGAGCTCCTATGAACAGTACTTC	0	0	0	0	0	0.000106238	0	0	0	0	3
15720	TGTGCCAGCAGCAAGGACTGGGGGGGCGGCTATGAACAGTACTTC	0	0	0	0	0	0.000182123	0	0	0	0	3
15733	TGTGCCAGCAGCACGGACAGGGGAAGTGACACCCAGTACTTT	0	0	0	0	0	0.000106238	0	0	0	0	3
15744	TGTGCCAGCAGCAGGGACAGGGGAAACACAGAAGTCTTC	0	0	0	0	0	0.000349069	0	0	0	0	3
15745	TGTGCCAGCAGCAGGGACAGGGGAAACACCGGGCGGCTCTACTTT	0	0	0	0	0	0.001973	0	0	0	0	3
15746	TGTGCCAGCAGCAGGGACAGGGGCTATGCTGAGCAGTTC	0	0	0	0	0	0.000166946	0	0	0	0	3
15772	TGTGCCAGCAGCCAAACAGGGGAGGGTGAGCAGTACTTC	0	0	0	0	0	0.000121415	0	0	0	0	3
15774	TGTGCCAGCAGCCAAACAGGGGGCAACCAGGCTCCGCTTTTT	0	0	0	0	0	0.000318715	0	0	0	0	3
15786	TGTGCCAGCAGCCAAACCGAGGCAGGGGACACAGAAGTCTTC	0	0	0	0	0	0.0001973	0	0	0	0	3
15787	TGTGCCAGCAGCCAAACCGGGACAGCAAACACAGAAGTCTTC	0	0	0	0	0	0.213387	0	0	0	0	3
15794	TGTGCCAGCAGCCAAACGACAAAAACAGAGGTCTTC	0	0	0	0	0	0.000895437	0	0	0	0	3
15798	TGTGCCAGCAGCCAAACTTTTGCTGAAACGCTGTATTTT	0	0	0	0	0	0.00212477	0	0	0	0	3
15803	TGTGCCAGCAGCCAAAGGACAGAAGGCAACCAGGCTCCGCTTTTT	0	0	0	0	0	0.0432087	0	0	0	0	3
15815	TGTGCCAGCAGCCAAAGGATTAACCAAGACACAGAAGTCTTC	0	0	0	0	0	7.58845e-05	0	0	0	0	3
15830	TGTGCCAGCAGCCAACACCTTTCCAACGAAAGATTATTT	0	0	0	0	0	0.103355	0	0	0	0	3
15859	TGTGCCAGCAGCCAACCGGGACTGGGGGGGCTTGAACAGTACTTC	0	0	0	0	0	0.0276979	0	0	0	0	3
15880	TGTGCCAGCAGCCAAGAAACAGTTAACTATGCTGAGCAGTTC	0	0	0	0	0	0.0348765	0	0	0	0	3
15882	TGTGCCAGCAGCCAAGAAACGACAGGGGCCAACGAAAGACTATTT	0	0	0	0	0	0.00044013	0	0	0	0	3
15883	TGTGCCAGCAGCCAAGAAACTCTCTATGAGCAGTACTTC	0	0	0	0	0	0.040234	0	0	0	0	3
15905	TGTGCCAGCAGCCAAGAACGCCACTCCTATGAGCAGTACTTC	0	0	0	0	0	0.180423	0	0	0	0	3
15910	TGTGCCAGCAGCCAAGAACGGGGGAGCACAGAAGTCTTC	0	0	0	0	0	0.16725	0	0	0	0	3
15916	TGTGCCAGCAGCCAAGAACTGGGGGGGGGCTATGCTAAGCAGTTC	0	0	0	0	0	0.00277737	0	0	0	0	3
15938	TGTGCCAGCAGCCAAGAAGGACAGGGGGCTGGAAATACGCTCTATTTT	0	0	0	0	0	0.30155	0	0	0	0	3
15939	TGTGCCAGCAGCCAAGAAGGACAGGGGGGGTATGAGCAGTACTTC	0	0	0	0	0	0.000212477	0	0	0	0	3
15943	TGTGCCAGCAGCCAAGAAGGAGGGACTAGTGCAGAAACGCTGTGTTTT	0	0	0	0	0	0.00210959	0	0	0	0	3
15946	TGTGCCAGCAGCCAAGAAGGCAGGGGGAGTGTAGAAACGCTGTATTTT	0	0	0	0	0	0.00201853	0	0	0	0	3
15957	TGTGCCAGCAGCCAAGAAGGGACAGGTTACACAGAAACGCTGTATTTT	0	0	0	0	0	9.10614e-05	0	0	0	0	3
15958	TGTGCCAGCAGCCAAGAAGGGACAGGTTACACAGAAGTCTTC	0	0	0	0	0	0.0829114	0	0	0	0	3
15991	TGTGCCAGCAGCCAAGACAACTGGGGGAAAGACACCCAGTACTTT	0	0	0	0	0	0.0368799	0	0	0	0	3
16005	TGTGCCAGCAGCCAAGACAGGGAGGGTACCGAAACGCTGTATTTT	0	0	0	0	0	0.00298985	0	0	0	0	3
16018	TGTGCCAGCAGCCAAGACAGTAGTGCAGAGACGCTGTATTTT	0	0	0	0	0	0.00189711	0	0	0	0	3
16042	TGTGCCAGCAGCCAAGACCGCTGGGGTGAGCAGTTC	0	0	0	0	0	0.000516015	0	0	0	0	3
16051	TGTGCCAGCAGCCAAGACCGGGGCAGGGGGGAACAGTACTTC	0	0	0	0	0	0.000106238	0	0	0	0	3
16055	TGTGCCAGCAGCCAAGACCTGGGGGCTGGAAATACGCTCTATTTT	0	0	0	0	0	7.58845e-05	0	0	0	0	3
16064	TGTGCCAGCAGCCAAGACGAGGGGAGAGAGCAGTACTTC	0	0	0	0	0	0.049841	0	0	0	0	3
16065	TGTGCCAGCAGCCAAGACGCGGGGGCGCGTTCAGAAACGCTGTATTTT	0	0	0	0	0	0.408198	0	0	0	0	3
16066	TGTGCCAGCAGCCAAGACGCGGGGGCGCGTTCAGAAGTCTTC	0	0	0	0	0	7.58845e-05	0	0	0	0	3
16068	TGTGCCAGCAGCCAAGACGGAAGTCAAAACACCTTGTACTTT	0	0	0	0	0	0.179179	0	0	0	0	3
16082	TGTGCCAGCAGCCAAGACGGGGGTAGTGCAGAAAGATTATTT	0	0	0	0	0	7.58845e-05	0	0	0	0	3
16083	TGTGCCAGCAGCCAAGACGGGGGTAGTGCAGAAGTCTTC	0	0	0	0	0	7.58845e-05	0	0	0	0	3
16084	TGTGCCAGCAGCCAAGACGGGGGTAGTGCAGAGACGCTGTATTTT	0	0	0	0	0	0.00383976	0	0	0	0	3
16096	TGTGCCAGCAGCCAAGACTCTGGGGGGGCGCATGCTGAGCAGTTC	0	0	0	0	0	0.162545	0	0	0	0	3
16111	TGTGCCAGCAGCCAAGACTGGGGGAGTGCCGAAACGCGGTATTTT	0	0	0	0	0	0.000136592	0	0	0	0	3
16118	TGTGCCAGCAGCCAAGACTGGGGGCTTGCAGAAGTCTTC	0	0	0	0	0	0.000470484	0	0	0	0	3
16119	TGTGCCAGCAGCCAAGACTGGGGGCTTGTAGAAATGCTGTATTTT	0	0	0	0	0	0.0001973	0	0	0	0	3
16159	TGTGCCAGCAGCCAAGAGAGGGGGGAGATAGGCACCGGGCAGCTCTACTTT	0	0	0	0	0	0.214981	0	0	0	0	3
16163	TGTGCCAGCAGCCAAGAGATGGACACAGAAGTCTGCTTT	0	0	0	0	0	0.000485661	0	0	0	0	3
16164	TGTGCCAGCAGCCAAGAGATGGACAGCTCCTATGAGCAGTACTTC	0	0	0	0	0	0.0826383	0	0	0	0	3
16165	TGTGCCAGCAGCCAAGAGATGGACGGCGAAAGATTATTT	0	0	0	0	0	0.000106238	0	0	0	0	3
16187	TGTGCCAGCAGCCAAGAGGCGGGGACAACAAACACAGAAGTCTTC	0	0	0	0	0	0.25312	0	0	0	0	3
16202	TGTGCCAGCAGCCAAGAGGGCAACACAGAAGTCTCCTTT	0	0	0	0	0	0.00165428	0	0	0	0	3
16206	TGTGCCAGCAGCCAAGAGGGGACACCTCAAGACACCCAGTACTTC	0	0	0	0	0	0.000667784	0	0	0	0	3
16223	TGTGCCAGCAGCCAAGAGGGGGGGGGGCGGGCTGAACAGTTC	0	0	0	0	0	0.000136592	0	0	0	0	3
16237	TGTGCCAGCAGCCAAGAGTGGGGGGCGCCTGCAGAAACGCTGTATTTT	0	0	0	0	0	0.025224	0	0	0	0	3
16238	TGTGCCAGCAGCCAAGAGTTATCTAGTGCGGAAACGCTGTATTTT	0	0	0	0	0	0.0023676	0	0	0	0	3
16242	TGTGCCAGCAGCCAAGATAACACCGGGAAAACCGGGCAGCTCTACTTT	0	0	0	0	0	7.58845e-05	0	0	0	0	3
16248	TGTGCCAGCAGCCAAGATAAGGACAGGGGAGACACCCAGTACTTT	0	0	0	0	0	0.132343	0	0	0	0	3
16266	TGTGCCAGCAGCCAAGATACGGACAGGGTTTATGAGCAGTTC	0	0	0	0	0	0.00174534	0	0	0	0	3
16272	TGTGCCAGCAGCCAAGATACGTCTGGGACGGGTGCAGAAACGCTGTATTTT	0	0	0	0	0	0.465658	0	0	0	0	3
16273	TGTGCCAGCAGCCAAGATACGTCTGGGACGGGTGCAGAAAGATTATTT	0	0	0	0	0	0.000106238	0	0	0	0	3
16306	TGTGCCAGCAGCCAAGATATGGGGAACCAAGACACCGGGCAGCTCTACTTT	0	0	0	0	0	0.000212477	0	0	0	0	3
16307	TGTGCCAGCAGCCAAGATATGGGGAGCCAGGACACCCAGTACTTT	0	0	0	0	0	0.000227654	0	0	0	0	3
16335	TGTGCCAGCAGCCAAGATCCAGGGGGCAACCAGGCTCCGCTTTTT	0	0	0	0	0	0.0778727	0	0	0	0	3
16338	TGTGCCAGCAGCCAAGATCCCAGCTATGAACAGTACTTC	0	0	0	0	0	0.000652607	0	0	0	0	3
16340	TGTGCCAGCAGCCAAGATCCCGGGGAAACCGGGCAGTTC	0	0	0	0	0	0.000925791	0	0	0	0	3
16354	TGTGCCAGCAGCCAAGATCCTGGGGGGGGCACCGGGCAGCTCTACTTT	0	0	0	0	0	0.088709	0	0	0	0	3
16365	TGTGCCAGCAGCCAAGATCGGGGTATCAACGAAAGATTATTT	0	0	0	0	0	0.000166946	0	0	0	0	3
16366	TGTGCCAGCAGCCAAGATCGGGGTGAGCAGTACTTC	0	0	0	0	0	0.466235	0	0	0	0	3
16371	TGTGCCAGCAGCCAAGATCTCAGCGCAGAAACGCTGTATTTT	0	0	0	0	0	0.00244348	0	0	0	0	3
16372	TGTGCCAGCAGCCAAGATCTCCTGGGGGGGTATGAGCAGTTC	0	0	0	0	0	0.00154804	0	0	0	0	3
16374	TGTGCCAGCAGCCAAGATCTGGGGAACTATGCTGAGCAGTTC	0	0	0	0	0	0.394159	0	0	0	0	3
16392	TGTGCCAGCAGCCAAGATGAGGCAAATACGCTCTATTTT	0	0	0	0	0	0.0494312	0	0	0	0	3
16398	TGTGCCAGCAGCCAAGATGCCAACTATGAGCAGTACTTC	0	0	0	0	0	0.106982	0	0	0	0	3
16424	TGTGCCAGCAGCCAAGATGGCTTTTCCAACGAAAGATTATTT	0	0	0	0	0	0.0844898	0	0	0	0	3
16434	TGTGCCAGCAGCCAAGATGGGCAAAACACAGAAGTCTTC	0	0	0	0	0	0.0526942	0	0	0	0	3
16437	TGTGCCAGCAGCCAAGATGGGGAGGGAGGAATAATTCGCCCCTCTACTTTACGGCAGGCTCAGCATTTT	0	0	0	0	0	7.58845e-05	0	0	0	0	3
16444	TGTGCCAGCAGCCAAGATGGGGGGGCAAACACCGGGCAGCTCTACTTT	0	0	0	0	0	0.00581276	0	0	0	0	3
16456	TGTGCCAGCAGCCAAGATGGTGGGAATTCTGGAAATACGTTC	0	0	0	0	0	0.000242831	0	0	0	0	3
16467	TGTGCCAGCAGCCAAGATTACAGGGGAAACACCGGGCAGCCCTACTTT	0	0	0	0	0	0.0040067	0	0	0	0	3
16479	TGTGCCAGCAGCCAAGATTCGGGGGGGGATGCTGAGCAGCTCTTC	0	0	0	0	0	0.00270149	0	0	0	0	3
16481	TGTGCCAGCAGCCAAGATTCTGGGCCCCACTATGAACGGTACTTC	0	0	0	0	0	0.00242831	0	0	0	0	3
16482	TGTGCCAGCAGCCAAGATTCTTGGACAGGGACCGGGCAGCTCTACTTT	0	0	0	0	0	0.00180605	0	0	0	0	3
16492	TGTGCCAGCAGCCAAGATTGGGGAAGTGCAGAAACGCCGTATTTT	0	0	0	0	0	0.00555475	0	0	0	0	3
16506	TGTGCCAGCAGCCAAGATTTCCAGGTCGACACCCAGTACTTT	0	0	0	0	0	0.023251	0	0	0	0	3
16509	TGTGCCAGCAGCCAAGATTTGGGACAGGGCACAGAAGTCTTC	0	0	0	0	0	0.0346489	0	0	0	0	3
16511	TGTGCCAGCAGCCAAGATTTTGGGTTCAACGAAAGATTATTT	0	0	0	0	0	0.0296101	0	0	0	0	3
16529	TGTGCCAGCAGCCAAGCCAGGGGCTATGCTGAGCAGTTC	0	0	0	0	0	0.239309	0	0	0	0	3
16530	TGTGCCAGCAGCCAAGCCAGGGGGCGCTTCGAAAGATTATTT	0	0	0	0	0	0.000273184	0	0	0	0	3
16531	TGTGCCAGCAGCCAAGCCAGGGGGGGCGAGGGTGCAGAAACGCTGTATTTT	0	0	0	0	0	0.000318715	0	0	0	0	3
16540	TGTGCCAGCAGCCAAGCCCGGCAGGGAGAAGACACCCAGTACTTT	0	0	0	0	0	0.0429355	0	0	0	0	3
16554	TGTGCCAGCAGCCAAGCCGGGGCAGGGACAGAAGTCTTC	0	0	0	0	0	0.000667784	0	0	0	0	3
16560	TGTGCCAGCAGCCAAGCGAGGGGCGAAAGATTACTTTTC	0	0	0	0	0	0.00100168	0	0	0	0	3
16561	TGTGCCAGCAGCCAAGCGGACAGTTCCAACGAAAGATTACTTTTC	0	0	0	0	0	0.00182123	0	0	0	0	3
16567	TGTGCCAGCAGCCAAGCGGGGGGCCAAGACACGCTGTATTTT	0	0	0	0	0	0.0001973	0	0	0	0	3
16575	TGTGCCAGCAGCCAAGCTGGGGGCGCCTACGAACAGTACTTC	0	0	0	0	0	0.00135074	0	0	0	0	3
16588	TGTGCCAGCAGCCAAGGACAGGGGGCGAACACCCAGTACTTT	0	0	0	0	0	0.0255883	0	0	0	0	3
16615	TGTGCCAGCAGCCAAGGCACTGGGGTCTATGAACAGTACTTC	0	0	0	0	0	0.000227654	0	0	0	0	3
16636	TGTGCCAGCAGCCAAGGGAACTATGCTGAGCAGTACTTC	0	0	0	0	0	0.000333892	0	0	0	0	3
16637	TGTGCCAGCAGCCAAGGGAATCCTGGAAATACGCTCTATTTT	0	0	0	0	0	0.00204888	0	0	0	0	3
16645	TGTGCCAGCAGCCAAGGGACAGATGCTGAGCAGTCCTTC	0	0	0	0	0	0.0011838	0	0	0	0	3
16656	TGTGCCAGCAGCCAAGGGACAGGGGGCACAGAAGTCTTC	0	0	0	0	0	7.58845e-05	0	0	0	0	3
16657	TGTGCCAGCAGCCAAGGGACAGGGGGCAGAGCTGAGCAGTTC	0	0	0	0	0	0.0156929	0	0	0	0	3
16659	TGTGCCAGCAGCCAAGGGACAGGGGGCGAAAGATTATTT	0	0	0	0	0	0.209973	0	0	0	0	3
16673	TGTGCCAGCAGCCAAGGGACTGAAAACGAAAGATTATTT	0	0	0	0	0	0.000561546	0	0	0	0	3
16676	TGTGCCAGCAGCCAAGGGACTGGGAACACCGGGCAGTTC	0	0	0	0	0	0.00180605	0	0	0	0	3
16683	TGTGCCAGCAGCCAAGGGACTGGGGGGGTTGCAGAAACGCTGTATTTT	0	0	0	0	0	0.0580972	0	0	0	0	3
16700	TGTGCCAGCAGCCAAGGGCAGGGGGAGTATGCTGAGCAGTTC	0	0	0	0	0	0.10982	0	0	0	0	3
16711	TGTGCCAGCAGCCAAGGGGACTGGGGGGACTATGAGCAGTACTTC	0	0	0	0	0	0.00192747	0	0	0	0	3
16715	TGTGCCAGCAGCCAAGGGGATGGCGCAGAAGTCTTC	0	0	0	0	0	0.0003946	0	0	0	0	3
16724	TGTGCCAGCAGCCAAGGGGGAGGGGCTCCGCTTTTT	0	0	0	0	0	0.00153287	0	0	0	0	3
16746	TGTGCCAGCAGCCAAGGTACACAGGTCTCCTATGAGCAGTACTTC	0	0	0	0	0	0.00327821	0	0	0	0	3
16754	TGTGCCAGCAGCCAAGGTGTTTGGGGGGGGGGTGCTGAGCAGTTC	0	0	0	0	0	0.0285326	0	0	0	0	3
16755	TGTGCCAGCAGCCAAGGTTACAGGGGGAACACCGGGCAGCTCTACTTT	0	0	0	0	0	0.000151769	0	0	0	0	3
16757	TGTGCCAGCAGCCAAGTACAGAAACAAAACACCTTGTACTTT	0	0	0	0	0	0.0151466	0	0	0	0	3
16763	TGTGCCAGCAGCCAAGTACTGGGGGGGATCTATGAGCAGTACTTC	0	0	0	0	0	9.10614e-05	0	0	0	0	3
16769	TGTGCCAGCAGCCAAGTCAAGAACACAGAAGTCTTC	0	0	0	0	0	0.0264533	0	0	0	0	3
16782	TGTGCCAGCAGCCAAGTGGACCAAGACACCCAGTACTTT	0	0	0	0	0	0.389728	0	0	0	0	3
16783	TGTGCCAGCAGCCAAGTGGAGGGGGCGTCGCCCCTCTACTTT	0	0	0	0	0	0.0327062	0	0	0	0	3
16790	TGTGCCAGCAGCCAAGTGGGGGGCGCCAACGAAAGATTATTT	0	0	0	0	0	0.000485661	0	0	0	0	3
16791	TGTGCCAGCAGCCAAGTGGGGGGCGCGAGTGACACCCAGTACTTT	0	0	0	0	0	0.0269087	0	0	0	0	3
16792	TGTGCCAGCAGCCAAGTGGGGGGGTTCTCTGCTGAGCAGTTC	0	0	0	0	0	0.000136592	0	0	0	0	3
16797	TGTGCCAGCAGCCAAGTTGAGGGGGGAAACACCTTGTACTTT	0	0	0	0	0	0.0666418	0	0	0	0	3
16798	TGTGCCAGCAGCCAAGTTGAGGGGGGCTCCTATGAGCAGTACTTC	0	0	0	0	0	0.000182123	0	0	0	0	3
16803	TGTGCCAGCAGCCAAGTTGGGGGGGAGGGAGACGCCCAGTACTTT	0	0	0	0	0	0.00204888	0	0	0	0	3
16815	TGTGCCAGCAGCCAATCTAACCAAGACACCCAGTACTTT	0	0	0	0	0	0.0532102	0	0	0	0	3
16869	TGTGCCAGCAGCCAGAAGGAGGACACAAACACAGAAGTCTTC	0	0	0	0	0	0.000121415	0	0	0	0	3
16870	TGTGCCAGCAGCCAGAAGGAGGACGGCGAAAGATTATTT	0	0	0	0	0	0.0334195	0	0	0	0	3
16875	TGTGCCAGCAGCCAGACAACTAGTGCAGAAGCGCTGTATTTT	0	0	0	0	0	0.00179087	0	0	0	0	3
16876	TGTGCCAGCAGCCAGACAGGGCCCAACGAAAGATTATTT	0	0	0	0	0	0.056534	0	0	0	0	3
16882	TGTGCCAGCAGCCAGACCGGGACAGGGGACACCGGGCAGCTCTACTTT	0	0	0	0	0	0.000288361	0	0	0	0	3
16883	TGTGCCAGCAGCCAGACCGGGACGGGGGACGAAAGATTATTT	0	0	0	0	0	0.00083473	0	0	0	0	3
16888	TGTGCCAGCAGCCAGACTGGCGACTATGCTGAGCAGTTC	0	0	0	0	0	0.0492794	0	0	0	0	3
16896	TGTGCCAGCAGCCAGCACAAAAACACCGGGCAGCTCTACTTT	0	0	0	0	0	0.00135074	0	0	0	0	3
16901	TGTGCCAGCAGCCAGCCGGGACAACACTCCTATGAACAGTACTTC	0	0	0	0	0	0.00141145	0	0	0	0	3
16915	TGTGCCAGCAGCCAGGACCTGGGGGGGGTTGAACAGTACTTC	0	0	0	0	0	0.00185158	0	0	0	0	3
16939	TGTGCCAGCAGCCAGGAGGACGGGGGGCGCTTCGAAAGATTATTT	0	0	0	0	0	7.58845e-05	0	0	0	0	3
16940	TGTGCCAGCAGCCAGGAGGGACAGGGAGACACCCAGTACTTT	0	0	0	0	0	0.00173017	0	0	0	0	3
16960	TGTGCCAGCAGCCAGGGACAGTATTCCAACGAAAGATTATTT	0	0	0	0	0	0.0639858	0	0	0	0	3
16978	TGTGCCAGCAGCCAGGGCATCGACTATGCTGAGCAGTTC	0	0	0	0	0	0.0858102	0	0	0	0	3
16979	TGTGCCAGCAGCCAGGGCTGGGACAACTATGCTGAGCAGCTCTTC	0	0	0	0	0	0.00142663	0	0	0	0	3
16995	TGTGCCAGCAGCCAGGGGACTGGGGGGGCGAGGCAAAACACCTTGTACTTT	0	0	0	0	0	0.0526032	0	0	0	0	3
17017	TGTGCCAGCAGCCAGTTCTGGGGGGGCGCTTCTGAGCAGTACTTC	0	0	0	0	0	0.000576722	0	0	0	0	3
17022	TGTGCCAGCAGCCATAGGCTGGGCTATGAGCAGTACTTC	0	0	0	0	0	0.000516015	0	0	0	0	3
17050	TGTGCCAGCAGCCCAAGACAACTCACAGAAGTCTTC	0	0	0	0	0	0.0312493	0	0	0	0	3
17053	TGTGCCAGCAGCCCACAAATTTCCAACGAAAGATGGGGAGGGAGGAATAATTCGCCCCTCTACTTT	0	0	0	0	0	0.000258007	0	0	0	0	3
17063	TGTGCCAGCAGCCCACAGGTTGCAAACACAGAAGTCTTC	0	0	0	0	0	0.123236	0	0	0	0	3
17064	TGTGCCAGCAGCCCACCAATTTCCAACGAAAGATTATTT	0	0	0	0	0	0.00373352	0	0	0	0	3
17091	TGTGCCAGCAGCCCAGGGGACGCAAACTCCGACTACACCTTC	0	0	0	0	0	0.000774022	0	0	0	0	3
17096	TGTGCCAGCAGCCCCAATAGTGCAGAAAACGAAAGATTATTT	0	0	0	0	0	7.58845e-05	0	0	0	0	3
17097	TGTGCCAGCAGCCCCAATAGTGCAGAAACGCTGCATTTT	0	0	0	0	0	0.000500838	0	0	0	0	3
17147	TGTGCCAGCAGCCCCCCTCCGGGACGGGGGATATATGAACAGTACTTC	0	0	0	0	0	0.00115344	0	0	0	0	3
17149	TGTGCCAGCAGCCCCCCTGGGGGCTATGCTGAGCAGTTC	0	0	0	0	0	0.0001973	0	0	0	0	3
17150	TGTGCCAGCAGCCCCCCTGGGGGGGCAAGCACCGGGCAGCTCTACTTT	0	0	0	0	0	0.000136592	0	0	0	0	3
17195	TGTGCCAGCAGCCCCCGGGACAGTAGCACAGAAGCCTTC	0	0	0	0	0	0.00203371	0	0	0	0	3
17213	TGTGCCAGCAGCCCCGACAGGGGGCAGGACACCGGGCAGCCCTACTTT	0	0	0	0	0	0.00179087	0	0	0	0	3
17215	TGTGCCAGCAGCCCCGACTGGGGGCCAAACACAGAAGTCTTC	0	0	0	0	0	0.000227654	0	0	0	0	3
17216	TGTGCCAGCAGCCCCGACTGGGGGCCAAACACCGGGCAGCTCTACTTT	0	0	0	0	0	0.153454	0	0	0	0	3
17218	TGTGCCAGCAGCCCCGACTGGGGGGAGTATGCTGAGCAGTTC	0	0	0	0	0	0.000273184	0	0	0	0	3
17224	TGTGCCAGCAGCCCCGACTGGGGGGGTTCTCAAAACACCTTGTACTTT	0	0	0	0	0	0.0670971	0	0	0	0	3
17227	TGTGCCAGCAGCCCCGAGACAGGGTCCCACTATGAACAGTACTTC	0	0	0	0	0	9.10614e-05	0	0	0	0	3
17231	TGTGCCAGCAGCCCCGGACAGGGGGCTGGAAATACGCTCTATTTT	0	0	0	0	0	0.00101685	0	0	0	0	3
17232	TGTGCCAGCAGCCCCGGACAGGGTTATGAGCAGTACTTC	0	0	0	0	0	0.540723	0	0	0	0	3
17239	TGTGCCAGCAGCCCCGGACTGGGGGGCTATGCCGAGCAGTTC	0	0	0	0	0	0.00213994	0	0	0	0	3
17242	TGTGCCAGCAGCCCCGGACTGGGGGTCAGCTCCTATGAACAATACTTC	0	0	0	0	0	0.000728492	0	0	0	0	3
17255	TGTGCCAGCAGCCCCGGGACAGGCCTCCCCTATGAACAGTACTTC	0	0	0	0	0	0.00130521	0	0	0	0	3
17258	TGTGCCAGCAGCCCCGGGACAGGGGATGCTGAGCAGCTCTTC	0	0	0	0	0	0.000971322	0	0	0	0	3
17266	TGTGCCAGCAGCCCCGGGACAGGTTACACAGAAGTCTTC	0	0	0	0	0	0.000379423	0	0	0	0	3
17275	TGTGCCAGCAGCCCCGGGACTGGGGGAAACACCGGGCAGCTCTACTTT	0	0	0	0	0	0.0003946	0	0	0	0	3
17277	TGTGCCAGCAGCCCCGGGACTGGGGGCTATGCTGAGCAGTTC	0	0	0	0	0	0.369284	0	0	0	0	3
17291	TGTGCCAGCAGCCCCGGGGAAAGTGCGGAAACGCTGTATTTT	0	0	0	0	0	0.00129004	0	0	0	0	3
17295	TGTGCCAGCAGCCCCTCAGACTGGGGGGGCGCGGAAGACACCCAGTACTTT	0	0	0	0	0	0.0629538	0	0	0	0	3
17309	TGTGCCAGCAGCCCGACAGGGAGGGCTGAGCAGTCCTTC	0	0	0	0	0	0.000895437	0	0	0	0	3
17310	TGTGCCAGCAGCCCGACAGGGGAGGGTGCTGAGCAGTTC	0	0	0	0	0	0.0142815	0	0	0	0	3
17328	TGTGCCAGCAGCCCGCCACGGGTGGCAAACACCGGGCAGCTCTACTTT	0	0	0	0	0	0.0001973	0	0	0	0	3
17329	TGTGCCAGCAGCCCGCTGGGGGCTAGCGCAGAAACGCTGTATTTT	0	0	0	0	0	0.000106238	0	0	0	0	3
17334	TGTGCCAGCAGCCCGGACACTTCTGGAAATACGCTCTATTTT	0	0	0	0	0	0.0251026	0	0	0	0	3
17342	TGTGCCAGCAGCCCGGACAGGGGGCGGGCAGAAACGCTGTATTTT	0	0	0	0	0	0.000576722	0	0	0	0	3
17345	TGTGCCAGCAGCCCGGACAGGGGTGGGGAGCAGTACTTC	0	0	0	0	0	0.0452575	0	0	0	0	3
17346	TGTGCCAGCAGCCCGGACAGGGTTTATGAGCAGTACTTC	0	0	0	0	0	0.000106238	0	0	0	0	3
17350	TGTGCCAGCAGCCCGGACGGCAGAAACACAGAAGTCTTC	0	0	0	0	0	7.58845e-05	0	0	0	0	3
17351	TGTGCCAGCAGCCCGGACGGCTATAATTCGCCCCTCTACTTT	0	0	0	0	0	0.0390957	0	0	0	0	3
17352	TGTGCCAGCAGCCCGGACGGGACAGGGACAGAAGTCTTC	0	0	0	0	0	7.58845e-05	0	0	0	0	3
17354	TGTGCCAGCAGCCCGGACTGGGGCGACTATGCTGAGCAGTTC	0	0	0	0	0	0.000121415	0	0	0	0	3
17355	TGTGCCAGCAGCCCGGACTGGGGGGTCTCGCCCCTCTACTTT	0	0	0	0	0	7.58845e-05	0	0	0	0	3
17370	TGTGCCAGCAGCCCGGGACAGGGGGTGGGTGCAGAAGTCTTC	0	0	0	0	0	0.000121415	0	0	0	0	3
17372	TGTGCCAGCAGCCCGGGACAGGGTATCAACGAAAGATTATTT	0	0	0	0	0	0.257704	0	0	0	0	3
17373	TGTGCCAGCAGCCCGGGACAGGGTATTTATGCTGAGCAGTTC	0	0	0	0	0	7.58845e-05	0	0	0	0	3
17375	TGTGCCAGCAGCCCGGGACAGGTGGGTTTCGCCCTCTACTTT	0	0	0	0	0	0.000182123	0	0	0	0	3
17385	TGTGCCAGCAGCCCGGGCCTGGGACTTAACCAAGACGCCCAGTACTTT	0	0	0	0	0	0.00204888	0	0	0	0	3
17387	TGTGCCAGCAGCCCGGGCTGGGGGGTCTCCTATGAGCAGTACTTC	0	0	0	0	0	0.00280773	0	0	0	0	3
17393	TGTGCCAGCAGCCCGGGGCTGGGGGGGTTCTCTGCTGAGCAGTTC	0	0	0	0	0	0.00245866	0	0	0	0	3
17419	TGTGCCAGCAGCCCTCCTGAGGGGGCGAACACCGGGCAGCTCTACTTT	0	0	0	0	0	0.000106238	0	0	0	0	3
17420	TGTGCCAGCAGCCCTCCTGGGGGGGCAAACACAGAAGTCTTC	0	0	0	0	0	0.000591899	0	0	0	0	3
17421	TGTGCCAGCAGCCCTCCTGGGGGGGCGCTGGTTGAGCAGTACTTC	0	0	0	0	0	7.58845e-05	0	0	0	0	3
17422	TGTGCCAGCAGCCCTCCTGGGGGGGCTGCAGAAACGCTGTATTTT	0	0	0	0	0	0.000273184	0	0	0	0	3
17445	TGTGCCAGCAGCCCTCGGGGGAACTATGCTGAGCAGTTC	0	0	0	0	0	0.199865	0	0	0	0	3
17450	TGTGCCAGCAGCCCTCGTTCCTATAATTCGCCCCTCTACTTT	0	0	0	0	0	0.000136592	0	0	0	0	3
17462	TGTGCCAGCAGCCCTGGGACAAATAGTGCAGAGACGCTGTATTTT	0	0	0	0	0	0.0031568	0	0	0	0	3
17480	TGTGCCAGCAGCCCTGTGACAGGGTCCTATGAGCAGTACTTC	0	0	0	0	0	0.000379423	0	0	0	0	3
17486	TGTGCCAGCAGCCGACAAATTTCCAACGAAAGATTGCTTTTC	0	0	0	0	0	7.58845e-05	0	0	0	0	3
17487	TGTGCCAGCAGCCGACAAATTTCCCACCAAAGATTATTT	0	0	0	0	0	7.58845e-05	0	0	0	0	3
17500	TGTGCCAGCAGCCGAGACAGAGGGCACACAGAAGTCTTC	0	0	0	0	0	0.0276068	0	0	0	0	3
17501	TGTGCCAGCAGCCGAGACAGAGGGCAGGACACCGGGCAGCTCTACTTT	0	0	0	0	0	0.000121415	0	0	0	0	3
17506	TGTGCCAGCAGCCGAGAGGGGGGGGGGCGAGCTGAGCAGTTC	0	0	0	0	0	0.000561546	0	0	0	0	3
17510	TGTGCCAGCAGCCGAGATCTCCGGTATGAGCAGTACTTC	0	0	0	0	0	0.00206406	0	0	0	0	3
17523	TGTGCCAGCAGCCGAGGGGACCGTCAAAACACCTTGTACTTT	0	0	0	0	0	0.000151769	0	0	0	0	3
17544	TGTGCCAGCAGCCGCGGGACAGTTTCCAACGAAAGATTATTT	0	0	0	0	0	0.0419034	0	0	0	0	3
17569	TGTGCCAGCAGCCGGACTGGGGGGGCGAGCTCCTATGAGCAGTACTTC	0	0	0	0	0	0.000743668	0	0	0	0	3
17573	TGTGCCAGCAGCCGGGACACTGCAAACACAGAAGTCTTC	0	0	0	0	0	0.00218547	0	0	0	0	3
17597	TGTGCCAGCAGCCGGGACTGGGGTATTTGTGCTGAGCAGTTC	0	0	0	0	0	0.00258007	0	0	0	0	3
17609	TGTGCCAGCAGCCGGGGGGCGGTTGGAAATACGCTCTATTTT	0	0	0	0	0	0.00153287	0	0	0	0	3
17632	TGTGCCAGCAGCCTAGATCGCGACTATTATGAACAGTACTTC	0	0	0	0	0	0.00956145	0	0	0	0	3
17639	TGTGCCAGCAGCCTCACAGGGGTTAGTGCAGAAGTCTTC	0	0	0	0	0	7.58845e-05	0	0	0	0	3
17682	TGTGCCAGCAGCCTCGGGACAGGGAGAGCAGAAACGCTGTATTTT	0	0	0	0	0	0.094795	0	0	0	0	3
17714	TGTGCCAGCAGCCTGGGACGTGCAAACACAGAAGTCTTC	0	0	0	0	0	0.00119898	0	0	0	0	3
17723	TGTGCCAGCAGCCTTCCTGGGGGAGCAGACACCGGGCAGCTCTACTTT	0	0	0	0	0	7.58845e-05	0	0	0	0	3
17738	TGTGCCAGCAGCGACAGTAACCAAGACACCCAGTACTTT	0	0	0	0	0	0.000106238	0	0	0	0	3
17745	TGTGCCAGCAGCGATACAGGGGGCGGTCAAAACACCTTGTACTTT	0	0	0	0	0	0.000865084	0	0	0	0	3
17774	TGTGCCAGCAGCGGGACTGGGGGCGCCAACGAAAGATTATTT	0	0	0	0	0	9.10614e-05	0	0	0	0	3
17775	TGTGCCAGCAGCGGGACTGGGGGGGCAGACACCGGGCAGCTCTACTTT	0	0	0	0	0	0.000151769	0	0	0	0	3
17776	TGTGCCAGCAGCGGGCCTGGGGAAAACACCTTGTACTTT	0	0	0	0	0	0.000455307	0	0	0	0	3
17846	TGTGCCAGCAGCTCCGGGGGCGCGGGCACAGAAGTCTTC	0	0	0	0	0	0.0156019	0	0	0	0	3
17856	TGTGCCAGCAGCTCGCTGGGGGGGGAAGACACCCAGTACTTT	0	0	0	0	0	9.10614e-05	0	0	0	0	3
17889	TGTGCCAGCAGCTTAACTGTTGCAGAAACGCTGTATTTT	0	0	0	0	0	0.00044013	0	0	0	0	3
17904	TGTGCCAGCAGCTTACTGGGGGGAAGAGCTGAGCAGTTC	0	0	0	0	0	0.000349069	0	0	0	0	3
17911	TGTGCCAGCAGCTTAGACAATAGTCAAAACACCTTGTACTTT	0	0	0	0	0	0.0001973	0	0	0	0	3
17923	TGTGCCAGCAGCTTAGAGGGGGCCGTCTATGCTGAGCAGTTC	0	0	0	0	0	0.000227654	0	0	0	0	3
17935	TGTGCCAGCAGCTTAGCGCCGGACCCTGGAAATACGCTCTATTTT	0	0	0	0	0	9.10614e-05	0	0	0	0	3
17966	TGTGCCAGCAGCTTAGGTGGGGGGGCCGACCAAGACACCCAGTACTTT	0	0	0	0	0	0.000561546	0	0	0	0	3
17995	TGTGCCAGCAGCTTCAGGACTAACCAAGACACCCAGTACTTT	0	0	0	0	0	0.000531192	0	0	0	0	3
18047	TGTGCCAGCAGGAGGGGGAAAGGTCAAAACACCTTGTACTTT	0	0	0	0	0	0.0163911	0	0	0	0	3
18053	TGTGCCAGCAGGCCCACAGGGGGCAAAGACACCCAGTACTTT	0	0	0	0	0	0.000652607	0	0	0	0	3
18065	TGTGCCAGCAGGCTAGGGGGGCGCTATGCTGAGCAGTTC	0	0	0	0	0	0.000713315	0	0	0	0	3
18068	TGTGCCAGCAGGCTGGGGGGCGGTCAAAACACCTTGTACTTT	0	0	0	0	0	0.000121415	0	0	0	0	3
18078	TGTGCCAGCAGGGACAGTGCAGAAACGCTGTATTTT	0	0	0	0	0	0.885906	0	0	0	0	3
18079	TGTGCCAGCAGGGACAGTGCAGGGGAATACGATGAACAGTACTTC	0	0	0	0	0	0.000789199	0	0	0	0	3
18080	TGTGCCAGCAGGGACTCAAACACCTTGTACTTT	0	0	0	0	0	0.0232358	0	0	0	0	3
18097	TGTGCCAGCAGGGCCGGGACTGGGGGGGCGCGTGACACCCAGTACTTT	0	0	0	0	0	0.000652607	0	0	0	0	3
18104	TGTGCCAGCAGGGGCTGGCAGGCTCAGCATTTT	0	0	0	0	0	0.000455307	0	0	0	0	3
18155	TGTGCCAGCAGTAGGGACTGGGGGGGCTACCAAGACACCCAGTACTTT	0	0	0	0	0	0.000166946	0	0	0	0	3
18181	TGTGCCAGCAGTATTCCCGACAGGCGGTCCGACTACACCTTC	0	0	0	0	0	9.10614e-05	0	0	0	0	3
18228	TGTGCCAGCAGTCCACCGGGACATCAAGACACCCAGTACTTT	0	0	0	0	0	0.0129307	0	0	0	0	3
18236	TGTGCCAGCAGTCCCAGGGATAGTCGAAACACCTTGTACTTT	0	0	0	0	0	0.000182123	0	0	0	0	3
18274	TGTGCCAGCAGTCCCGGGGCACCAAACACAGAAGTCTTC	0	0	0	0	0	0.00300503	0	0	0	0	3
18292	TGTGCCAGCAGTCCGACTGGGGCCTATGAACAGTACTTC	0	0	0	0	0	9.10614e-05	0	0	0	0	3
18296	TGTGCCAGCAGTCCGGACAGGAGGCTTGCTGAGCAGTTC	0	0	0	0	0	0.000318715	0	0	0	0	3
18297	TGTGCCAGCAGTCCGGACAGGGAAGACACCCAGGACTTT	0	0	0	0	0	0.0001973	0	0	0	0	3
18343	TGTGCCAGCAGTCGACAGGGGAGGGACTCCGACTACACCTTC	0	0	0	0	0	0.000561546	0	0	0	0	3
18347	TGTGCCAGCAGTCGACAGGGTGAAACCACCTTGTACTTT	0	0	0	0	0	0.000531192	0	0	0	0	3
18350	TGTGCCAGCAGTCGACTGGGGACCTATGAACAGTACTTC	0	0	0	0	0	0.0328276	0	0	0	0	3
18468	TGTGCCAGCAGTCTGACTGGGGGGCAAGACACCCAGTACTTTGGGCCAGGGGGAAACACGGAAGTCTTC	0	0	0	0	0	0.000151769	0	0	0	0	3
18489	TGTGCCAGCAGTCTGCGGGACAGCTATGAGCAGTACTTC	0	0	0	0	0	7.58845e-05	0	0	0	0	3
18525	TGTGCCAGCAGTCTGGGGGCCGCAAACACAGAAGTCTTC	0	0	0	0	0	0.0190167	0	0	0	0	3
18667	TGTGCCAGCAGTGACAGGGGTAATTCGCCCCTCTACTTT	0	0	0	0	0	0.0242223	0	0	0	0	3
18674	TGTGCCAGCAGTGACCCGACAGCCTCCTATAATTCGCCCCTCTACTTT	0	0	0	0	0	0.498835	0	0	0	0	3
18696	TGTGCCAGCAGTGACGGACAAAACACAGAGGTCTTC	0	0	0	0	0	0.00294432	0	0	0	0	3
18723	TGTGCCAGCAGTGACTGGGGGGGCGCGGATGGGCAGTACTTC	0	0	0	0	0	0.000698138	0	0	0	0	3
18767	TGTGCCAGCAGTGAGGGGGACAGAAACTCCGACTACACCTTC	0	0	0	0	0	0.00106238	0	0	0	0	3
18794	TGTGCCAGCAGTGATACTGGGGGGGCTGAGCAGTCCTTC	0	0	0	0	0	0.00135074	0	0	0	0	3
18802	TGTGCCAGCAGTGATAGGGCTGGGGGGACTTATGCTGAGCAGTTC	0	0	0	0	0	0.0183641	0	0	0	0	3
18829	TGTGCCAGCAGTGATCCGGGGGTCTCCTATGGACAGTACTTC	0	0	0	0	0	0.00153287	0	0	0	0	3
18837	TGTGCCAGCAGTGATCGGCAGGCCTATGAACAGTACTTC	0	0	0	0	0	0.0456521	0	0	0	0	3
18838	TGTGCCAGCAGTGATCGGGACAGAGACACAGAAGTCTTC	0	0	0	0	0	0.000136592	0	0	0	0	3
18849	TGTGCCAGCAGTGATCTGGACAGCCAAGACACCCAGTACTTT	0	0	0	0	0	0.00954627	0	0	0	0	3
18863	TGTGCCAGCAGTGATGACAGGGAGGAAGACACCCAGTACTTT	0	0	0	0	0	0.0346033	0	0	0	0	3
18902	TGTGCCAGCAGTGATGCAGCAGGGGAATACGATGAACAGTACTTC	0	0	0	0	0	1.96518	0	0	0	0	3
18904	TGTGCCAGCAGTGATGCAGCAGGGGGAAACTCCGGCTACACCTTC	0	0	0	0	0	9.10614e-05	0	0	0	0	3
18907	TGTGCCAGCAGTGATGCAGGACGCACAGAAGTCTTC	0	0	0	0	0	0.00133557	0	0	0	0	3
18914	TGTGCCAGCAGTGATGCAGGGGTTTATGCTGAGCAGTTC	0	0	0	0	0	0.0226136	0	0	0	0	3
18943	TGTGCCAGCAGTGATGCGGATTCCTATAATTCGCCCCCCTACTTT	0	0	0	0	0	0.000546369	0	0	0	0	3
18953	TGTGCCAGCAGTGATGCGGGGAACCATGCTGAGCAGTTC	0	0	0	0	0	0.000758845	0	0	0	0	3
18954	TGTGCCAGCAGTGATGCGGGGACATCAGAAGTCCTCTTT	0	0	0	0	0	0.00103203	0	0	0	0	3
18956	TGTGCCAGCAGTGATGCGGGGGACAGGGAGGGTGCAGAAACGCTATATTTT	0	0	0	0	0	0.00230689	0	0	0	0	3
18957	TGTGCCAGCAGTGATGCGGGGGACAGGGAGGGTGCAGAAGTCTTC	0	0	0	0	0	0.000743668	0	0	0	0	3
18958	TGTGCCAGCAGTGATGCGGGGGACAGGGCCAACGAAAGATTATTT	0	0	0	0	0	0.000455307	0	0	0	0	3
18960	TGTGCCAGCAGTGATGCGGGTAGTGCCGAAACGATGTATTTT	0	0	0	0	0	0.000151769	0	0	0	0	3
18983	TGTGCCAGCAGTGATGGCCGGAACACAGAAGTCTTC	0	0	0	0	0	0.00201853	0	0	0	0	3
18989	TGTGCCAGCAGTGATGGGACATTTTCCAACGAAAGATTATTT	0	0	0	0	0	0.0288361	0	0	0	0	3
18998	TGTGCCAGCAGTGATGGGGACCGGCACCCCGACTACACCTTC	0	0	0	0	0	0.0827141	0	0	0	0	3
19000	TGTGCCAGCAGTGATGGGGATTCTGGAAATACGCTCTATTTT	0	0	0	0	0	0.0150707	0	0	0	0	3
19003	TGTGCCAGCAGTGATGGGGGGACAGGGGGCGACACCGGGCAGCTCTACTTT	0	0	0	0	0	0.0236153	0	0	0	0	3
19004	TGTGCCAGCAGTGATGGGGGGCGAGAACAGTACTTC	0	0	0	0	0	7.58845e-05	0	0	0	0	3
19062	TGTGCCAGCAGTGATTTGGGTAGTCAAAACACCTTGTACTTT	0	0	0	0	0	0.0481563	0	0	0	0	3
19109	TGTGCCAGCAGTGCGGGACAGAACACAGAAGTCTCCTTT	0	0	0	0	0	0.000849907	0	0	0	0	3
19120	TGTGCCAGCAGTGGAAGGAATTCCTATAATTCGCCCCTCTACTTT	0	0	0	0	0	0.0026256	0	0	0	0	3
19159	TGTGCCAGCAGTGGCGACAGGTCCTATGAACAGTACTTC	0	0	0	0	0	0.0750802	0	0	0	0	3
19174	TGTGCCAGCAGTGGGACAGGGGGAAACACAGAAGTCTTC	0	0	0	0	0	0.388498	0	0	0	0	3
19175	TGTGCCAGCAGTGGGACAGGGGGAAACACCTTGTACTTT	0	0	0	0	0	0.000121415	0	0	0	0	3
19176	TGTGCCAGCAGTGGGACAGGGGGAAACGATGAACAGTACTTC	0	0	0	0	0	0.000667784	0	0	0	0	3
19228	TGTGCCAGCAGTGGGGGGACAAAAACTAGTGCAGAAACGCTGTATTTC	0	0	0	0	0	0.00238277	0	0	0	0	3
19253	TGTGCCAGCAGTGGTGGGGGCAGTCGAAACACCTTGTACTTT	0	0	0	0	0	0.0023676	0	0	0	0	3
19292	TGTGCCAGCAGTTCCCGGGACAACCAAGACACCCAGTACTTT	0	0	0	0	0	0.0263926	0	0	0	0	3
19313	TGTGCCAGCAGTTCGGGACTGGGGGGAAACACAGAAGTCTTC	0	0	0	0	0	0.000182123	0	0	0	0	3
19314	TGTGCCAGCAGTTCGGGGCTGGGGGGGCGGAACTATGCTGAGCAGTTC	0	0	0	0	0	0.0028229	0	0	0	0	3
19351	TGTGCCAGCAGTTTAGGGACTGGGTCTAGTGCAGAGACGCTGTATTTT	0	0	0	0	0	0.00191229	0	0	0	0	3
19372	TGTGCCAGCAGTTTCAGAGGGGCCCAAGACACCCAGTACTTT	0	0	0	0	0	0.000728492	0	0	0	0	3
19410	TGTGCCAGCAGTTTCTCAGGGCGGGACACCCAGTACTTT	0	0	0	0	0	0.000182123	0	0	0	0	3
19426	TGTGCCAGCAGTTTGAGGGACGGTGCAGAGACGCTGTATTTT	0	0	0	0	0	0.0001973	0	0	0	0	3
19448	TGTGCCAGCAGTTTGTGGACTGGGAGCTATGAACAGTACTTC	0	0	0	0	0	0.000106238	0	0	0	0	3
19455	TGTGCCAGCAGTTTTCGGGACAATGCTGAGCAGTTC	0	0	0	0	0	0.000424953	0	0	0	0	3
19457	TGTGCCAGCAGTTTTGCATTTAACCAAGACACCCAGTACTTT	0	0	0	0	0	0.000273184	0	0	0	0	3
19467	TGTGCCAGCAGTTTTTGGGGAAGGGGTGCAGAAACGCTGTATTTT	0	0	0	0	0	0.000713315	0	0	0	0	3
19501	TGTGCCAGCCGGGACATCTCCTATGAACAGTACTTC	0	0	0	0	0	0.0313555	0	0	0	0	3
19503	TGTGCCAGCCGGGGAAGTCAAAACACAGAAGTCTTC	0	0	0	0	0	0.000166946	0	0	0	0	3
19520	TGTGCCAGCGCACAGAACCAAGACACCCAGTACTTT	0	0	0	0	0	0.0892706	0	0	0	0	3
19526	TGTGCCAGCGCCCATCCGGGACTGAACTATGAACAGTACTTC	0	0	0	0	0	0.0109577	0	0	0	0	3
19555	TGTGCCAGCGGAGGGACTGGGAGGGCCGAAGACACCCAGTACTTT	0	0	0	0	0	0.000880261	0	0	0	0	3
19556	TGTGCCAGCGGAGGGACTGGGGGGGCCGAAAGATTATTT	0	0	0	0	0	7.58845e-05	0	0	0	0	3
19562	TGTGCCAGCGGCACCGGGACAACAAACACGGAAGTCTTC	0	0	0	0	0	0.000971322	0	0	0	0	3
19603	TGTGCCAGCGGCCAAGATGGGGGGGCGAGCTCCTATGAGCAGTACTTC	0	0	0	0	0	0.00183641	0	0	0	0	3
19619	TGTGCCAGCGGCCAAGTACTGGGGGGGATCTATGCTGAGCAGTTC	0	0	0	0	0	0.00212477	0	0	0	0	3
19620	TGTGCCAGCGGCCAAGTCCTGCAAGACACCCAGTACTTT	0	0	0	0	0	0.000333892	0	0	0	0	3
19633	TGTGCCAGCGGCCCCGACCGTAGTGCAGAAACGCTGTATTTT	0	0	0	0	0	0.00238277	0	0	0	0	3
19636	TGTGCCAGCGGCCGAGACTGGGGGAACTATGCTGAGCAGTTC	0	0	0	0	0	0.00220065	0	0	0	0	3
19661	TGTGCCAGCGGCGGGGGACAAATTTCCAACGAAAGATTATTT	0	0	0	0	0	0.0498258	0	0	0	0	3
19667	TGTGCCAGCGGGACAGGAGGAAGACAAAGCACCTTGTACTTT	0	0	0	0	0	0.000804376	0	0	0	0	3
19677	TGTGCCAGCGGGAGGGGGGAGCACTTC	0	0	0	0	0	0.000591899	0	0	0	0	3
19684	TGTGCCAGCGGGGACAATAACAACCAGGCTCCGCTTTTT	0	0	0	0	0	0.0838221	0	0	0	0	3
19691	TGTGCCAGCGGGGAGGGGCGTGAAACGCTGTATTTT	0	0	0	0	0	0.0937174	0	0	0	0	3
19715	TGTGCCAGCGGGTGGGGGGATAACCAAGACACCCAGTACTTT	0	0	0	0	0	0.032858	0	0	0	0	3
19742	TGTGCCAGCGGTCCTCTACTGGGGAGCTATGCTGAGCAGTTC	0	0	0	0	0	0.0833212	0	0	0	0	3
19758	TGTGCCAGCGGTGAAAAGGGGTATGACCCGTCCTTC	0	0	0	0	0	7.58845e-05	0	0	0	0	3
19761	TGTGCCAGCGGTGAACAGGGAGGAGGTAACACCGGGCAGCTCTACTTT	0	0	0	0	0	0.00173017	0	0	0	0	3
19769	TGTGCCAGCGGTGAAGACAGGGGGCAGGGCTCCGACTACACCTTC	0	0	0	0	0	0.0015784	0	0	0	0	3
19792	TGTGCCAGCGGTGAAGGGGTGAACTCCGACTACACCTTC	0	0	0	0	0	0.269011	0	0	0	0	3
19793	TGTGCCAGCGGTGAAGTGGACTGGGGCTTT	0	0	0	0	0	7.58845e-05	0	0	0	0	3
19824	TGTGCCAGCGGTGACGAAGGGACCGGGTACTTC	0	0	0	0	0	0.0113675	0	0	0	0	3
19850	TGTGCCAGCGGTGACTGGGGGGCGAGTCAAAACACCTATAATTCGCCCCTCTACTTT	0	0	0	0	0	0.000106238	0	0	0	0	3
19851	TGTGCCAGCGGTGACTGGGGGGCGAGTCAAAGCACCTCGTACTTT	0	0	0	0	0	0.000258007	0	0	0	0	3
19865	TGTGCCAGCGGTGAGAGGGGGGCAACAAACACAGAAGTCTTC	0	0	0	0	0	0.000151769	0	0	0	0	3
19866	TGTGCCAGCGGTGAGAGGGGGGCAACTTATGAACAGTACTTC	0	0	0	0	0	0.0941272	0	0	0	0	3
19881	TGTGCCAGCGGTGAGCTCCGACGCGGAGGGAATTCGCCCCTCTACTTT	0	0	0	0	0	0.0633788	0	0	0	0	3
19896	TGTGCCAGCGGTGAGGTCTGGGGGTCTAGTCAAAACACCTTGTACTTT	0	0	0	0	0	0.386692	0	0	0	0	3
19902	TGTGCCAGCGGTGATAAGGGGGCGCAAGTCTTC	0	0	0	0	0	0.0186979	0	0	0	0	3
19908	TGTGCCAGCGGTGATACCGGGAACTCCGACTACACCTTC	0	0	0	0	0	0.0508426	0	0	0	0	3
19919	TGTGCCAGCGGTGATAGGACTGGGGGTGGTCAAAACACCTTGTACTTT	0	0	0	0	0	0.00212477	0	0	0	0	3
19923	TGTGCCAGCGGTGATATGGGGGGCTATGAACAGTACTTC	0	0	0	0	0	0.0372593	0	0	0	0	3
19924	TGTGCCAGCGGTGATATGGGGGGCTATGCTGAGCAGTTC	0	0	0	0	0	0.000106238	0	0	0	0	3
19926	TGTGCCAGCGGTGATCACAGGGGGCGAGGCACAGAAGTCTTC	0	0	0	0	0	0.0445139	0	0	0	0	3
19987	TGTGCCAGCGGTGATCTGGGGTTCACCGGGCAGCTTTACTTT	0	0	0	0	0	0.00761881	0	0	0	0	3
20010	TGTGCCAGCGGTGATGCAACAGCAGAAGTCTTC	0	0	0	0	0	0.0669757	0	0	0	0	3
20012	TGTGCCAGCGGTGATGCAACCCCGCTGGCGATATATGAGCAGTACTTC	0	0	0	0	0	0.00367281	0	0	0	0	3
20013	TGTGCCAGCGGTGATGCAACTGGGGGCTCCTATGAGCAGTACTTC	0	0	0	0	0	7.58845e-05	0	0	0	0	3
20016	TGTGCCAGCGGTGATGCAATTGGGGGGTCCTATGAACAGTACTTC	0	0	0	0	0	0.0293066	0	0	0	0	3
20022	TGTGCCAGCGGTGATGCACAGGGGTCCTATGCTGAGCAGTTC	0	0	0	0	0	7.58845e-05	0	0	0	0	3
20023	TGTGCCAGCGGTGATGCACAGGGTCAAAACACCTTGTACTTT	0	0	0	0	0	0.251269	0	0	0	0	3
20066	TGTGCCAGCGGTGATGCCGGGAATGAACAGTACTTC	0	0	0	0	0	9.10614e-05	0	0	0	0	3
20067	TGTGCCAGCGGTGATGCCGGGACAGATTCCTATAATTCGCCCTTC	0	0	0	0	0	0.00163911	0	0	0	0	3
20075	TGTGCCAGCGGTGATGCGACAAATTCTGGGAATACGCTCTATTTT	0	0	0	0	0	0.00206406	0	0	0	0	3
20093	TGTGCCAGCGGTGATGCGGGCAGGGCTCCCGAAAGATTATTT	0	0	0	0	0	0.0221431	0	0	0	0	3
20103	TGTGCCAGCGGTGATGCTCATTATTCCAACGAAAGATTATTT	0	0	0	0	0	0.0379119	0	0	0	0	3
20179	TGTGCCAGCGGTGATGTGGATTCCTATAATTCGCCCCTCTACTTT	0	0	0	0	0	0.000500838	0	0	0	0	3
20180	TGTGCCAGCGGTGATGTGGGACAGGGAGACACCCAGTACTTT	0	0	0	0	0	0.0399304	0	0	0	0	3
20186	TGTGCCAGCGGTGATGTGGGGGTCAACCAAGACACCCAGTACTTT	0	0	0	0	0	0.00145698	0	0	0	0	3
20199	TGTGCCAGCGGTGATTCAGGGCACTTT	0	0	0	0	0	0.00132039	0	0	0	0	3
20216	TGTGCCAGCGGTGATTGGGTGGCTAACTATGCTGAGCAGTTC	0	0	0	0	0	0.052679	0	0	0	0	3
20232	TGTGCCAGCGGTGCCAACAGGGATGAGCAGTACTTC	0	0	0	0	0	0.00169981	0	0	0	0	3
20242	TGTGCCAGCGGTGCCGACTGGAATGAACAGTACTTC	0	0	0	0	0	0.262075	0	0	0	0	3
20288	TGTGCCAGCGGTGGACTGGGGAACACCGACTACACCTTC	0	0	0	0	0	9.10614e-05	0	0	0	0	3
20289	TGTGCCAGCGGTGGACTGGGGAACACCTCGTACTTT	0	0	0	0	0	0.00221583	0	0	0	0	3
20296	TGTGCCAGCGGTGGCCAAAACTCCGACTACACCTTC	0	0	0	0	0	0.105055	0	0	0	0	3
20316	TGTGCCAGCGGTGGGACAGGGGGCGCAGCAGAAACGCTGTATTTT	0	0	0	0	0	0.000971322	0	0	0	0	3
20354	TGTGCCAGCGGTGGGGGACCTTCCTATAATTCGCCCCTCTACTTT	0	0	0	0	0	0.0859165	0	0	0	0	3
20378	TGTGCCAGCGGTGGTGAACAGGCTCCGCTTTTT	0	0	0	0	0	0.000182123	0	0	0	0	3
20379	TGTGCCAGCGGTGGTGCACAGGGGTCTGGAAATACGCTCTATTTT	0	0	0	0	0	0.00204888	0	0	0	0	3
20380	TGTGCCAGCGGTGGTGCATTGTCAAACACCGGGCAGCTCTACTTT	0	0	0	0	0	0.00173017	0	0	0	0	3
20414	TGTGCCAGCGGTGTCGGGACACCAAACACAGAAGTCTTC	0	0	0	0	0	0.000151769	0	0	0	0	3
20422	TGTGCCAGCGGTGTCGGGATTCAAAACACCTTGTACTTT	0	0	0	0	0	0.00169981	0	0	0	0	3
20426	TGTGCCAGCGGTGTGGACTGGGGGTCCTATGAACAGTACTTC	0	0	0	0	0	0.000303538	0	0	0	0	3
20427	TGTGCCAGCGGTGTGGACTGGGGGTCCTATGCTGAGCAGTTC	0	0	0	0	0	0.0806349	0	0	0	0	3
20452	TGTGCCAGCTACACCGGGCAGCTCTACTTT	0	0	0	0	0	1.02843	0	0	0	0	3
20476	TGTGCCAGCTCCCTACTGGGCAATTATGAACAGTACTTC	0	0	0	0	0	0.000258007	0	0	0	0	3
20496	TGTGCCAGCTCGACAGGGGGAAAGGACACCTTGTACTTT	0	0	0	0	0	0.0161331	0	0	0	0	3
20645	TGTGCCAGTAGCCAGGAGATGGACACAGAAGTCTTC	0	0	0	0	0	0.000121415	0	0	0	0	3
20676	TGTGCCAGTCTACTGGGGGGGCGCACCGGGCGGCTCTACTTT	0	0	0	0	0	0.000546369	0	0	0	0	3
20736	TGTGCCGGCAGCCAAACAGGGGAGGGTGCAGAAACGCTGTATTTT	0	0	0	0	0	0.00560028	0	0	0	0	3
20737	TGTGCCGGCAGCCAAACCGGGACAGCAAACACCGGGCAGCTCTACTTT	0	0	0	0	0	0.00305056	0	0	0	0	3
20743	TGTGCCGGCAGCCAAATAGGGGGAAGTCAAAACACCTTGTACTTT	0	0	0	0	0	0.00233724	0	0	0	0	3
20747	TGTGCCGGCAGCCAAGAACCGTTCACAGAAACGCTGTATTTT	0	0	0	0	0	0.000652607	0	0	0	0	3
20749	TGTGCCGGCAGCCAAGAAGACTGGGGCTCCTATGAGCAGTACTTC	0	0	0	0	0	0.00271667	0	0	0	0	3
20756	TGTGCCGGCAGCCAAGACCGGGACAGGGGAGAACAGTACTTC	0	0	0	0	0	0.0017757	0	0	0	0	3
20758	TGTGCCGGCAGCCAAGACTGGGGGGCTGCTGAGCAGTTC	0	0	0	0	0	0.00250419	0	0	0	0	3
20766	TGTGCCGGCAGCCAAGAGAGGGACAGCTATGAACAGTACTTC	0	0	0	0	0	0.00145698	0	0	0	0	3
20774	TGTGCCGGCAGCCAAGATACAATTTCCAACGAAAGATTATTT	0	0	0	0	0	0.00107756	0	0	0	0	3
20785	TGTGCCGGCAGCCAAGATGAGGGGGCGAGCACCTTGTACTTT	0	0	0	0	0	0.00166946	0	0	0	0	3
20794	TGTGCCGGCAGCCAAGATTTTAACCAAGACACCCAGTACTTT	0	0	0	0	0	0.00173017	0	0	0	0	3
20797	TGTGCCGGCAGCCAAGCTGGGGGGCGCCAAGACACCCAGTACTTT	0	0	0	0	0	0.00356657	0	0	0	0	3
20823	TGTGCCGGCAGCCCAGACTGGGGGTCTAGTGCAGAAACGCTGTATTTT	0	0	0	0	0	0.00318715	0	0	0	0	3
20827	TGTGCCGGCAGCCCCCCGGGACAGGGGGCCTATGAGCAGTACTTC	0	0	0	0	0	0.00154804	0	0	0	0	3
20834	TGTGCCGGCAGCCCCGGACAGGGGGGAGACTATGCTGAGCAGTTC	0	0	0	0	0	0.000106238	0	0	0	0	3
20843	TGTGCCGGCAGCCCGGGACAGGGGGTGGGTGCAGAAACGCTGTATTTT	0	0	0	0	0	0.0028229	0	0	0	0	3
20849	TGTGCCGGCAGCCCTCCTGGGGGGGCAAACACCGGGCAGCTCTACTTT	0	0	0	0	0	0.0205192	0	0	0	0	3
20854	TGTGCCGGCAGCCTCACAGGGGTTAGTGCAGAAACGCTGTATTTT	0	0	0	0	0	0.00145698	0	0	0	0	3
20890	TGTGCCGGCAGTGACCCACTGGGGGTTAACCAAGACACCCAGTACTTT	0	0	0	0	0	0.000789199	0	0	0	0	3
20902	TGTGCCGGCAGTGATGGGACAGGGAGGGCAGAAACGCTGTATTTT	0	0	0	0	0	0.00710279	0	0	0	0	3
20930	TGTGCCGGCGGACAGGGGAAGGACCAAGACACCCAGTACTTT	0	0	0	0	0	0.00139628	0	0	0	0	3
20936	TGTGCCGGCGGTCCCACTGGGGGCCTAAACTATGCTGAGCAGTTC	0	0	0	0	0	0.00153287	0	0	0	0	3
20937	TGTGCCGGCGGTGAAAAGGGGTATGAACAGTACTTC	0	0	0	0	0	0.000986499	0	0	0	0	3
20958	TGTGCCGGCGGTGGGGGAGGCTATGCTGAGCAGTTC	0	0	0	0	0	0.000925791	0	0	0	0	3
20979	TGTGCCTGCGGCCAAGACTGGGGGCTTGCAGAAACGCTGTATTTT	0	0	0	0	0	0.000136592	0	0	0	0	3
20992	TGTGCCTGGACTCTGGGAGCTAACCAAGACACCCAGTACTTT	0	0	0	0	0	0.0695558	0	0	0	0	3
21007	TGTGCCTGGAGCAAACTGGGGGCGCTTGAGCAGTACTTC	0	0	0	0	0	0.000121415	0	0	0	0	3
21008	TGTGCCTGGAGCAAACTGGGGGGAATCACCGGGCAGCTCTACTTT	0	0	0	0	0	0.000531192	0	0	0	0	3
21009	TGTGCCTGGAGCAAACTGGGGGGGCAAGACACAGAAGTCTTC	0	0	0	0	0	0.000106238	0	0	0	0	3
21010	TGTGCCTGGAGCAAACTGGGGGGGCAAGACACCCAGTACTTT	0	0	0	0	0	7.51465	0	0	0.141675	0	3
21011	TGTGCCTGGAGCAAACTGGGGGGGCAGGCTCCGCTTTTT	0	0	0	0	0	0.000546369	0	0	0	0	3
21012	TGTGCCTGGAGCAAGCTGGGGAGGCAAAACACCTTGTACTTT	0	0	0	0	0	0.000227654	0	0	0	0	3
21015	TGTGCCTGGAGCCACTGGGGGGTGGCTGAGCAGTTC	0	0	0	0	0	0.000516015	0	0	0	0	3
21017	TGTGCCTGGAGCCATCGGACTGGGGGGGATGAGCAGTACTTC	0	0	0	0	0	7.58845e-05	0	0	0	0	3
21028	TGTGCCTGGAGCCGGACTGGGCAAGACACCCAGTACTTT	0	0	0	0	0	0.128624	0	0	0	0	3
21037	TGTGCCTGGAGCGGGACAGGGGGGCAGGCTCCGCTTTTT	0	0	0	0	0	0.000409776	0	0	0	0	3
21066	TGTGCCTGGAGTCCAACAAGGGAGACAGAAGTCTTC	0	0	0	0	0	0.0354684	0	0	0	0	3
21109	TGTGCCTGGAGTCTAAAGACACCAAACACCGGGCAGCTCTACTTT	0	0	0	0	0	0.00526639	0	0	0	0	3
21119	TGTGCCTGGAGTCTAGACAGAGCAAACACAGAAGTCTTC	0	0	0	0	0	0.0374566	0	0	0	0	3
21121	TGTGCCTGGAGTCTAGACAGGGGGCAGGCTCCGCTTTTT	0	0	0	0	0	0.000136592	0	0	0	0	3
21128	TGTGCCTGGAGTCTAGACTGGGGGGCGAGTCAAAACACCTTGTACTTT	0	0	0	0	0	0.000182123	0	0	0	0	3
21138	TGTGCCTGGAGTCTAGCTGGGGGGACAGAAGTCTTC	0	0	0	0	0	7.58845e-05	0	0	0	0	3
21145	TGTGCCTGGAGTCTAGGGGACTGGGGAAACACCGGGCAGCTCTACTTT	0	0	0	0	0	0.107255	0	0	0	0	3
21164	TGTGCCTGGAGTCTCTGGGGGGGCCAAGACACCCAGTACTTT	0	0	0	0	0	0.0818339	0	0	0	0	3
21165	TGTGCCTGGAGTCTGGGGAATCAAGGCACCCAGTACTTT	0	0	0	0	0	9.10614e-05	0	0	0	0	3
21197	TGTGCCTGGATGTGGGGGGGGGCAGAAACGCTGTATTTT	0	0	0	0	0	0.000106238	0	0	0	0	3
21221	TGTGCCTGGGGTCTAGGGGGGGCGGTCACCGGGCAGCTCTACTTT	0	0	0	0	0	0.00162393	0	0	0	0	3
21233	TGTGCCTTTCAGGGGGCGCTTGAGCAGTACTTC	0	0	0	0	0	0.108834	0	0	0	0	3
21243	TGTGCTAGAGGAGGGGAGGGCGAAAGATTATTT	0	0	0	0	0	0.000349069	0	0	0	0	3
21244	TGTGCTAGAGGGGAGGGTAGTCAAAACACCTTGTACTTT	0	0	0	0	0	0.0237519	0	0	0	0	3
21304	TGTGCTAGCAGCCAAGTTGGGGGCGACTATGCTGAGCAGTTC	0	0	0	0	0	0.000865084	0	0	0	0	3
21306	TGTGCTAGCAGCCAGGACTGGGGGGGCGAGGGTGCAGAAGCGCTGTATTTT	0	0	0	0	0	0.00110791	0	0	0	0	3
21363	TGTGCTAGCAGGGACGAAAACACCGGGCAGCTCTACTTT	0	0	0	0	0	0.000940968	0	0	0	0	3
21399	TGTGCTAGCAGTAGACGCCGGGACGGCTATGAACAGTACTTC	0	0	0	0	0	0.000485661	0	0	0	0	3
21417	TGTGCTAGCAGTAGAGATCTAGGACAGAATAATTCGCCCCTCTACTTT	0	0	0	0	0	7.58845e-05	0	0	0	0	3
21468	TGTGCTAGCAGTCAATCTTTGGGGGGGCATGCTGAGCAGTTC	0	0	0	0	0	0.00387011	0	0	0	0	3
21476	TGTGCTAGCAGTCAGGGAGAGGAAAAAAACACCTTGTACTTT	0	0	0	0	0	9.10614e-05	0	0	0	0	3
21477	TGTGCTAGCAGTCAGGGGAGAGGAAAAAACACCTTGTACTTT	0	0	0	0	0	0.000865084	0	0	0	0	3
21478	TGTGCTAGCAGTCAGGGGAGAGGAAATACGCTCTATTTT	0	0	0	0	0	9.10614e-05	0	0	0	0	3
21492	TGTGCTAGCAGTCCCCGGACAGGGGGGTCCGACTACACCTTC	0	0	0	0	0	0.0236304	0	0	0	0	3
21538	TGTGCTAGCAGTCTCCGGGACAGGGGTAGCCAAGAGAACTTCTCCCTCATTCTGGAGTTGGCTACCCCCTCTCAGACATCAGTGTACTTCTGTGCCAGCGGTGCAAACTCCGACTACACCTTC	0	0	0	0	0	0.000364246	0	0	0	0	3
21539	TGTGCTAGCAGTCTCCGGGACAGGGGTCAAAACACCTTGTACTTC	0	0	0	0	0	0.00268631	0	0	0	0	3
21546	TGTGCTAGCAGTCTGGGACGGGGCTATGCTGAGCAGTTC	0	0	0	0	0	0.000121415	0	0	0	0	3
21552	TGTGCTAGCAGTGAAGACTGGGGGGAAAACACCTTGTACTTT	0	0	0	0	0	0.000576722	0	0	0	0	3
21581	TGTGCTAGCAGTTCAGGGACAGGGGCAGACACCCAGTACTTT	0	0	0	0	0	0.0212932	0	0	0	0	3
21626	TGTGCTAGCAGTTCTGGGGCAAACTCCGACTACACCTTC	0	0	0	0	0	0.000106238	0	0	0	0	3
21629	TGTGCTAGCAGTTCTGGGGGGTATGAACAGTACTTC	0	0	0	0	0	0.0733955	0	0	0	0	3
21658	TGTGCTAGCAGTTTACGGGATTCTGGAAATACGCTCTATTTT	0	0	0	0	0	0.0331008	0	0	0	0	3
21772	TGTGCTAGCAGTTTCGGGGGGAGGGAACAGTACTTC	0	0	0	0	0	0.0778575	0	0	0	0	3
21783	TGTGCTAGCAGTTTGAGGGGAGACACAGAAGTCTTC	0	0	0	0	0	0.0658222	0	0	0	0	3
21799	TGTGCTAGCAGTTTTAGGGATAGTCAAAACACCTTGTACTTT	0.000120177	0	0	0	0	0.0299896	0	0	0	0	3
21908	TGTGGCAGCGCGCCCGGGACAGGGTCCTATGAGCAGTACTTC	0	0	0	0	0	0.000106238	0	0	0	0	3
21913	TGTGGGACAGACACCGGGCAGCTCTACTTT	0	0	0	0	0	0.000273184	0	0	0	0	3
21920	TGTGGGGGACAGGGAGAGAATTATGCTGAGCAGTTC	0	0	0	0	0	0.000500838	0	0	0	0	3
21923	TGTGGTGACAGCAGCCAGGGACATTCCAACGAAAGATTATTT	0	0	0	0	0	0.000242831	0	0	0	0	3
21931	TGTGGTGCATCGACATACACAGAAGTCTTC	0	0	0	0	0	0.000166946	0	0	0	0	3
21939	TGTGGTGCCTGGGGACTGGGGGCAAACACCGGGCAGCTCTACTTT	0	0	0	0	0	7.58845e-05	0	0	0	0	3
21952	TGTGGTGCTAGGAATGGGGGGGTGCAGTTC	0	0	0	0	0	0.000288361	0	0	0	0	3
21956	TGTGGTGCTAGGAGTCTGGGGAACTATGCTGAGCAGTTC	0	0	0	0	0	9.10614e-05	0	0	0	0	3
21958	TGTGGTGCTAGGATCGGGACTGGTCAAAACACCTTGTACTTT	0	0	0	0	0	0.000121415	0	0	0	0	3
21959	TGTGGTGCTAGGATGGGGGATGAACAGTACTTC	0	0	0	0	0	0.000166946	0	0	0	0	3
21961	TGTGGTGCTAGGCTGGGGATTAACCAAGACACCCAGTACTTT	0	0	0	0	0	7.58845e-05	0	0	0	0	3
21964	TGTGGTGCTAGGGAACAGGGAAAAACGCTGTATTTT	0	0	0	0	0	0.000121415	0	0	0	0	3
21985	TGTGGTGCTAGGGATCCAGGGAGGACTGAGCAGTTC	0	0	0	0	0	0.000166946	0	0	0	0	3
22003	TGTGGTGCTAGGGGACTGGGGGCTGAGCAGTTC	0	0	0	0	0	0.0003946	0	0	0	0	3
22018	TGTGGTGCTCAGGACTGGGGGGATGAACAGTACTTC	0	0	0	0	0	0.000151769	0	0	0	0	3
22026	TGTGGTGCTGTAGCCCCGGGGAACTATGCTGAGCAGTTC	0	0	0	0	0	0.000136592	0	0	0	0	3
22039	TGTGGTTCTTCGGGACAGACCTATGAGCAGCTCTACTTT	0	0	0	0	0	9.10614e-05	0	0	0	0	3
22064	TGTGTCAGCAGCCGAGGGGACAGCATTTCCAACGAAAGATTATTT	0	0	0	0	0	0.000485661	0	0	0	0	3
22105	TGTGTTAGCAGCCAAGGGGATGGCGCAGAAACGCTGTATTTT	0	0	0	0	0	0.000409776	0	0	0	0	3
22112	TGTTTTTATGCCAGCAGCCAAAAACAAGACACCCAGTACTTT	0	0	0	0	0	0.000151769	0	0	0	0	3
7759	GAAGACTTCTGTGTTTTGTCCCGCACTGCA	0	0.000130947	0	0	2.30556	0	0	0	0	0	4
13959	TGCAGTGCGGGACAAAACACAGAAGTCTTC	0	0	0	0	2.67567	0	0	0	0	0	4
18100	TGTGCCAGCAGGGGACAGGGGAGCTCCTATGAACAGTACTTC	0	0.0854187	0	0	0	0	0	0	0	0	5
22092	TGTGTCAGCGGTGATGTCCGGGACTGGGGATATGCTGAGCAGTTC	0	0.0193066	0	0	0	0	0	0	0	0	5
2	AAAAAGCGGAGCCCCCAATAAACTGCTAGCACA	0	0	0	0	0	0	0	0	0.02032	0	6
8	AAAAAGCGGAGCCCGGCCCCCTGTCCCGGCACTGCAGGTGCAGTACAAGGTTCTGCCCTGGCTCATGTTGGCACA	0	0	0	0	0	0	0	0	0.00463982	0	6
9	AAAAAGCGGAGCCCGGTTGCCCCCGTCACTGCTGGCACA	0	0	0	0	0	0	0	0	0.000166103	0	6
13	AAAAAGCGGAGCCGCCCTGTCTGCACTGCAGGTGCAGTACAAGGTTCTGCCCTGGCCTTGGCTGCTGGCACA	0	0	0	0	0	0	0	0	0.00018825	0	6
14	AAAAAGCGGAGCCGCCTCCCTGTCCCGGCGGCTGCTGGCACA	0	0	0	0	0	0	0	0	0.000132883	0	6
15	AAAAAGCGGAGCCGCCTCCCTGTCCCGGGGAGCACTGCA	0	0	0	0	0	0	0	0	0.0509273	0	6
23	AAAAAGCGGAGCCTCTGGCGCACCGCTGGCACA	0	0	0	0	0	0	0	0	0.000564751	0	6
26	AAAAAGCGGAGCCTGACCCCTGTTCCGATCACCGCTGGCACA	0	0	0	0	0	0	0	0	0.000819443	0	6
28	AAAAAGCGGAGCCTGCACCCCCTGTCCCGGCCCACTGCTGGCACA	0	0	0	0	0	0	0	0	0.000575825	0	6
36	AAAAAGCGGAGCCTGGCCCCCTGTCCCGGAGTCACCGCTGGCACA	0	0	0	0	0	0	0	0	0.0645145	0	6
40	AAAAAGCGGAGCCTGGCCCTGCACTGCACTGCA	0	0	0	0	0	0	0	0	0.193732	0	6
43	AAAAAGCGGAGCCTGGCTGTCCCGTTGGCTGCTGGCACA	0	0	0	0	0	0	0	0	0.0204861	0	6
46	AAAAAGCGGAGCCTGGTCCCCTGTCCCACCGCA	0	0	0	0	0	0	0	0	0.00232545	0	6
58	AAAAAGCGGAGCCTGGTGGGGCTGTTCTAAGCTGCTGGCACA	0	0	0	0	0	0	0	0	0.000221471	0	6
66	AAAAAGCGGAGCCTGGTTCCTGTCCCGGGGAGCACTGCA	0	0	0	0	0	0	0	0	6.64413e-05	0	6
67	AAAAAGCGGAGCCTGGTTCCTGTCCTCATCACTGCTGGCACA	0	0	0	0	0	0	0	0	0.0187475	0	6
68	AAAAAGCGGAGCCTGGTTCTGTGTCCCGGGGACGCTGCTGGCGCA	0	0	0	0	0	0	0	0	0.000531531	0	6
70	AAAAAGCGGAGCCTGGTTGACCCCTGTCCCGGCCCTAGAACTACA	0	0	0	0	0	0	0	0	6.64413e-05	0	6
76	AAAAAGCGGAGCCTGGTTGCCCCCCCGTCGGCTGCTGGCACA	0	0	0	0	0	0	0	0	0.00130668	0	6
80	AAAAAGCGGAGCCTGGTTGCCCCCTGTCCCCCAACTGCTAGCACA	0	0	0	0	0	0	0	0	0.000719781	0	6
81	AAAAAGCGGAGCCTGGTTGCCCCCTGTCCCGGCACTGCA	0	0	0	0	0	0	0	0	0.378472	0	6
86	AAAAAGCGGAGCCTGGTTGCCGCCCCTGTGGTCACCGCTGGCACA	0	0	0	0	0	0	0	0	0.0532306	0	6
95	AAAAAGCGGAGCCTGGTTGCTGTCCCGGCCTTGGCTGCCGGCACA	0	0	0	0	0	0	0	0	0.00102984	0	6
96	AAAAAGCGGAGCCTGGTTGGAGTCAACATCACTGCTGGCACA	0	0	0	0	0	0	0	0	6.64413e-05	0	6
98	AAAAAGCGGAGCCTGGTTGGCCCATGTCCCTGCACTGCA	0	0	0	0	0	0	0	0	0.00106306	0	6
102	AAAAAGCGGAGCCTGGTTGGCCCCTGTCCCTCGGCTGCTGGCACA	0	0	0	0	0	0	0	0	9.9662e-05	0	6
103	AAAAAGCGGAGCCTGGTTGGCCCTCCCTGTCCCACTGCA	0	0	0	0	0	0	0	0	6.64413e-05	0	6
104	AAAAAGCGGAGCCTGGTTGGCCTTCCCCGGTGCACTGCA	0	0	0	0	0	0	0	0	0.00469519	0	6
105	AAAAAGCGGAGCCTGGTTGGCCTTCCCTGGTGCACTGCAGGTGCAGTACAAGGTTCTGCCCTGGCTGCTGGCACA	0	0	0	0	0	0	0	0	0.000287912	0	6
106	AAAAAGCGGAGCCTGGTTGGCTCCCCTGCTATCTGCACTGCGGGTGCA	0	0	0	0	0	0	0	0	0.00217042	0	6
107	AAAAAGCGGAGCCTGGTTGGCTCCCCTGTCCCGATCATTGCTGGCACA	0	0	0	0	0	0	0	0	0.00122916	0	6
114	AAAAAGCGGAGCCTGGTTGTCAGTCCCCTGGGCTGCACTGCA	0	0	0	0	0	0	0	0	0.00370964	0	6
115	AAAAAGCGGAGCCTGGTTGTCATCACTGCTGGCACTGCA	0	0	0	0	0	0	0	0	0.00034328	0	6
116	AAAAAGCGGAGCCTGGTTGTCATCTTGGCTGCTGGCACA	0	0	0	0	0	0	0	0	0.423431	0	6
118	AAAAAGCGGAGCCTGGTTGTCCCCTGACGCACTGTAGGTGCA	0	0	0	0	0	0	0	0	0.000730855	0	6
120	AAAAAGCGGAGCCTGGTTGTCCCCTGTCACACTGCCGGCACA	0	0	0	0	0	0	0	0	0.0023033	0	6
125	AAAAAGCGGAGCCTGGTTGTCCTCCCCCTGTCCGCCGCTGGCACA	0	0	0	0	0	0	0	0	0.0946235	0	6
126	AAAAAGCGGAGCCTGGTTGTCCTTACTAGCACCACA	0	0	0	0	0	0	0	0	6.64413e-05	0	6
128	AAAAAGCGGAGCCTGGTTGTCGCCCCCTGCTGCACTGCA	0	0	0	0	0	0	0	0	0.0813242	0	6
138	AAAAAGCGGAGCCTGGTTGTTAGCCCTGTCACTGCA	0	0	0	0	0	0	0	0	0.110259	0	6
139	AAAAAGCGGAGCCTGGTTGTTAGCCCTGTCACTGCAGGTGCAGTACAAGGTTCTGCCCTGGCTCATGTTGGCACA	0	0	0	0	0	0	0	0	0.00034328	0	6
143	AAAAAGCGGAGCCTGGTTGTTATACCAATCTGCACTGCA	0	0	0	0	0	0	0	0	0.172293	0	6
145	AAAAAGCGGAGCCTGGTTGTTATACCCTCTCCTCGCATCACCGCTGGCACA	0	0	0	0	0	0	0	0	0.00135097	0	6
151	AAAAAGCGGAGCCTGGTTGTTATATCCTTCCGCACTGCA	0	0	0	0	0	0	0	0	6.64413e-05	0	6
152	AAAAAGCGGAGCCTGGTTGTTATCCCCCCCTGCACTGCA	0	0	0	0	0	0	0	0	0.145628	0	6
154	AAAAAGCGGAGCCTGGTTGTTATCCCGGAGGCTGCTGGCACA	0	0	0	0	0	0	0	0	0.00015503	0	6
156	AAAAAGCGGAGCCTGGTTGTTATCCCGGGCACTGCGGGTGCA	0	0	0	0	0	0	0	0	0.00275732	0	6
157	AAAAAGCGGAGCCTGGTTGTTATCTGGCGGATGGCTGGCACA	0	0	0	0	0	0	0	0	0.015503	0	6
158	AAAAAGCGGAGCCTGGTTGTTATCTGTCCCGACTGCACTGCAGGTGCAGTACAAGGTTCTGCCCTGGCTCATGTTGGCCACTTGCAGCCTCAGCTCCGTATCAGTGACCCCCCTGGTGCTGGCACA	0	0	0	0	0	0	0	0	0.000243618	0	6
159	AAAAAGCGGAGCCTGGTTGTTATCTGTCTGTAAGGCACA	0	0	0	0	0	0	0	0	0.00476163	0	6
160	AAAAAGCGGAGCCTGGTTGTTATCTGTCTGTAAGGCACTGCAGGTGCAGTACAAGGTTCTGCCCTGGCTGCTGGCACA	0	0	0	0	0	0	0	0	0.000321133	0	6
167	AAAAAGCGGAGCCTGGTTGTTATTCCCTGTATCTTGGCTGCA	0	0	0	0	0	0	0	0	0.000542604	0	6
170	AAAAAGCGGAGCCTGGTTGTTATTGGTGCCGCTGGCACA	0	0	0	0	0	0	0	0	0.0345938	0	6
174	AAAAAGCGGAGCCTGGTTGTTATTTGTCCCACTGCA	0	0	0	0	0	0	0	0	0.132296	0	6
175	AAAAAGCGGAGCCTGGTTGTTATTTGTCCCACTGCAGGTGCAGTACAAGGTTCTGCCCTGTCTGGGGGCACTGCTGGCACA	0	0	0	0	0	0	0	0	0.000110736	0	6
181	AAAAAGCGGAGCCTGGTTGTTCCCTGCGAGACCGCTGGCACA	0	0	0	0	0	0	0	0	0.0663417	0	6
184	AAAAAGCGGAGCCTGGTTGTTCCGGCCCTGTCTGGGGGCACA	0	0	0	0	0	0	0	0	0.000642266	0	6
189	AAAAAGCGGAGCCTGGTTGTTCTGTCCCAAGGCACA	0	0	0	0	0	0	0	0	0.0402192	0	6
194	AAAAAGCGGAGCCTGGTTGTTGTTTTCTGCACTGCAGGTGCAGTACAAGGTTCTGCCCTGGCTCATGTTGGCACA	0	0	0	0	0	0	0	0	0.00768505	0	6
202	AAAAAGCGGAGCCTGGTTTTGCCCAACATCACCGCTGGCACA	0	0	0	0	0	0	0	0	0.0696084	0	6
204	AAAAAGCGGAGCCTGTCCCTGTAGGGCTTGGCTGCTGGCACA	0	0	0	0	0	0	0	0	0.0088367	0	6
209	AAAAAGCGGAGTCTGCCCCCTGTCGCTGCTGGCACA	0	0	0	0	0	0	0	0	0.00104091	0	6
211	AAAAAGCGGCGAACTGTCCCCTGCACTGCA	0	0	0	0	0	0	0	0	0.0514588	0	6
212	AAAAAGCGGCGAACTGTCCCCTGCACTGCAGGTGCAGTACAAGGTTCTGCCCTGGCTCATGTTGGCACA	0	0	0	0	0	0	0	0	0.000132883	0	6
214	AAAAAGCGGGGCCTCTGGCACACCGCTGGCACA	0	0	0	0	0	0	0	0	0.000919105	0	6
215	AAAAAGCGGGGCCTGGTCCCTGTCCCGGAGGCTGCTGACACA	0	0	0	0	0	0	0	0	7.75149e-05	0	6
216	AAAAAGGGTGTCCCGATCTGCACTGCA	0	0	0	0	0	0	0	0	0.000575825	0	6
231	AAAAGCGGAGCCACGCGCGAGAGAGCTGGCACA	0	0	0	0	0	0	0	0	5.53678e-05	0	6
234	AAAAGGCGGAGCCTGGTCTTCCCTGTCCCGGAGACTGCTGGCACA	0	0	0	0	0	0	0	0	0.00015503	0	6
235	AAAAGGCGGAGCCTGGTTGACCCCTGTCCCGTGGCTGCTGGCACA	0	0	0	0	0	0	0	0	0.0111068	0	6
236	AAAAGGCGGAGCCTGGTTGAGCTGTCCCCCACTGCTGGCACA	0	0	0	0	0	0	0	0	0.0275399	0	6
248	AAAATACAGCGCTTCTGCACCCCCAGTCCGATCTGCACTGCA	0	0	0	0	0	0	0	0	0.00325563	0	6
262	AAAATACAGCGCTTCTGCGTCTCCCCCAGTCTTGCA	0	0	0	0	0	0	0	0	7.75149e-05	0	6
263	AAAATACAGCGCTTCTGCTCGCCCCCCCAGCTCACCGCTGGCACA	0	0	0	0	0	0	0	0	0.00256906	0	6
268	AAAATACAGCGTCTCTGCACGCCCCCCCAGTCGACCGCTGGCACA	0	0	0	0	0	0	0	0	0.00379823	0	6
271	AAAATACAGCGTCTCTGCACTCCCAGTCCGGCTGCTGGCACA	0	0	0	0	0	0	0	0	0.0017607	0	6
275	AAAATACAGCGTCTCTGCTCCGGCCCCCCCGGATTCTTGGCTGCTGGCACA	0	0	0	0	0	0	0	0	0.00139527	0	6
276	AAAATACAGCGTCTGCCCCCTGTCCCGGCGGCTGCTGGCACA	0	0	0	0	0	0	0	0	0.086861	0	6
284	AAAATACAGCGTTCCTGCCCCCCAGTCCTGGCTGCTGGCACA	0	0	0	0	0	0	0	0	0.00333314	0	6
287	AAAATACAGCGTTGCTGCACTAGTTGGGTCACTGCTGGCACA	0	0	0	0	0	0	0	0	0.00156137	0	6
293	AAAATACAGCGTTTCCAGACCCTGCCCTTGGCTGCTGGCACA	0	0	0	0	0	0	0	0	0.0252588	0	6
296	AAAATACAGCGTTTCCATGTCCCGGACACTGCA	0	0	0	0	0	0	0	0	5.53678e-05	0	6
320	AAAATACAGCGTTTCCGCATAGCCCCCATCTTGGCTGCTGGCACA	0	0	0	0	0	0	0	0	0.000730855	0	6
326	AAAATACAGCGTTTCGCCCAGTCTTTGGCTGCTGGCACA	0	0	0	0	0	0	0	0	0.0900834	0	6
329	AAAATACAGCGTTTCTACACCGCCCCCCCAGTCCCTGGTGCAGGTGCAGTACAAGGTTCTGCCCTGGCTCATGTTGGCACA	0	0	0	0	0	0	0	0	0.000287912	0	6
342	AAAATACAGCGTTTCTCCGCCCCCTGTCCCGGCCCTAGAACTACA	0	0	0	0	0	0	0	0	0.0499639	0	6
353	AAAATACAGCGTTTCTGACCCCCAGTCCGCACTGCTAGCACA	0	0	0	0	0	0	0	0	0.000365427	0	6
354	AAAATACAGCGTTTCTGACCCCCAGTCCGCACTGTAGGTGCA	0	0	0	0	0	0	0	0	0.00080837	0	6
357	AAAATACAGCGTTTCTGACCCCGGATCTGCACTGCA	0	0	0	0	0	0	0	0	0.121964	0	6
379	AAAATACAGCGTTTCTGCAACCCCCCCCAGTCTTCTAGAACTACA	0	0	0	0	0	0	0	0	0.000221471	0	6
380	AAAATACAGCGTTTCTGCAACCCCCCCCAGTGCATCACCGCTGGCACA	0	0	0	0	0	0	0	0	0.136637	0	6
387	AAAATACAGCGTTTCTGCAACGCCCCCCCAGCCCCCACTGCTGGCACA	0	0	0	0	0	0	0	0	0.000420795	0	6
388	AAAATACAGCGTTTCTGCAACGCGCCCCCCCAGCTCACTGCA	0	0	0	0	0	0	0	0	0.00430761	0	6
399	AAAATACAGCGTTTCTGCACCACCCCCCAGGCCACTGCTGACACA	0	0	0	0	0	0	0	0	0.000697634	0	6
403	AAAATACAGCGTTTCTGCACCCACCCTTTGGTTGCTGGCACA	0	0	0	0	0	0	0	0	0.00121809	0	6
405	AAAATACAGCGTTTCTGCACCCAGTCCCGTATCTGCACTGCA	0	0	0	0	0	0	0	0	5.53678e-05	0	6
406	AAAATACAGCGTTTCTGCACCCAGTCCCGTATCTTGGCCGCTGGCACA	0	0	0	0	0	0	0	0	0.00157244	0	6
409	AAAATACAGCGTTTCTGCACCCCCAATCCCACCGCTGGCACA	0	0	0	0	0	0	0	0	0.00138419	0	6
416	AAAATACAGCGTTTCTGCACCCCCCCCAGCACTGCGGGTGCA	0	0	0	0	0	0	0	0	0.00633407	0	6
426	AAAATACAGCGTTTCTGCACCCCCTATCCGATCTGCACTGCAGGTGCAGTACAAGGTTCTGCCCTGGCTGCTGGCACA	0	0	0	0	0	0	0	0	0.00084159	0	6
427	AAAATACAGCGTTTCTGCACCCCCTATCCGATCTGTACTGCA	0	0	0	0	0	0	0	0	0.00270195	0	6
431	AAAATACAGCGTTTCTGCACCCCTCCCCCCCAGTCCGGGGCTACTGGCACA	0	0	0	0	0	0	0	0	0.00214827	0	6
433	AAAATACAGCGTTTCTGCACCCCTCCCTGTCCCGGTAGCACCACA	0	0	0	0	0	0	0	0	0.000121809	0	6
444	AAAATACAGCGTTTCTGCACCCGCCCCCTGCGCGCTGCTGGCACA	0	0	0	0	0	0	0	0	6.64413e-05	0	6
460	AAAATACAGCGTTTCTGCACCCTGTACACTGCTAGCACA	0	0	0	0	0	0	0	0	0.0370189	0	6
470	AAAATACAGCGTTTCTGCACCGCCCCCCCAGTCCCGACCGCTGGCACA	0	0	0	0	0	0	0	0	5.53678e-05	0	6
472	AAAATACAGCGTTTCTGCACCGCCCCCCCAGTCCCTGGTGCA	0	0	0	0	0	0	0	0	0.455466	0	6
480	AAAATACAGCGTTTCTGCACCTCCCCCCCAGTCTGCACTGCA	0	0	0	0	0	0	0	0	0.000110736	0	6
486	AAAATACAGCGTTTCTGCACCTTCGCCCATGCTGGCACA	0	0	0	0	0	0	0	0	0.00259121	0	6
491	AAAATACAGCGTTTCTGCACGCCCCCCCCCACTGCA	0	0	0	0	0	0	0	0	0.147577	0	6
501	AAAATACAGCGTTTCTGCACTAACAGCTTGGCTGCTGGCACA	0	0	0	0	0	0	0	0	0.34782	0	6
505	AAAATACAGCGTTTCTGCACTAACGTCGGAGCTGCTGGCACA	0	0	0	0	0	0	0	0	0.000166103	0	6
520	AAAATACAGCGTTTCTGCACTAATTTGACCTGCACTGCA	0	0	0	0	0	0	0	0	0.0472287	0	6
521	AAAATACAGCGTTTCTGCACTAATTTGACCTGCACTGCAGGTGCAGTACAGGGTTCTGCCCTGGCTCATGTTGGCACA	0	0	0	0	0	0	0	0	6.64413e-05	0	6
527	AAAATACAGCGTTTCTGCACTACCCCAGTCCCTATCCCTAGCACCACA	0	0	0	0	0	0	0	0	6.64413e-05	0	6
550	AAAATACAGCGTTTCTGCACTACTGACGCTGCTGGCACA	0	0	0	0	0	0	0	0	0.00218149	0	6
557	AAAATACAGCGTTTCTGCACTAGACCCAGCGGCACCGCA	0	0	0	0	0	0	0	0	0.00431869	0	6
560	AAAATACAGCGTTTCTGCACTAGACCCCAGTCTTCTAGAACTACA	0	0	0	0	0	0	0	0	0.114456	0	6
561	AAAATACAGCGTTTCTGCACTAGACCCCCAGTCACCGCTGGCACA	0	0	0	0	0	0	0	0	0.150966	0	6
563	AAAATACAGCGTTTCTGCACTAGACCCCCAGTTTTCTGCACTGCA	0	0	0	0	0	0	0	0	0.430307	0	6
571	AAAATACAGCGTTTCTGCACTAGAGGCCCTGTTCCCGCTGGCACA	0	0	0	0	0	0	0	0	0.0462432	0	6
572	AAAATACAGCGTTTCTGCACTAGATGTCCCGGATGTGCTGGCACA	0	0	0	0	0	0	0	0	0.0546369	0	6
573	AAAATACAGCGTTTCTGCACTAGATGTCCCGGCCCTAGAACTACA	0	0	0	0	0	0	0	0	0.00018825	0	6
603	AAAATACAGCGTTTCTGCACTAGCTGGCCCATCACCACTGGCACA	0	0	0	0	0	0	0	0	0.00141742	0	6
619	AAAATACAGCGTTTCTGCACTAGGCTGTGAGCTGCTGGCACA	0	0	0	0	0	0	0	0	0.0246608	0	6
620	AAAATACAGCGTTTCTGCACTAGGGCCCCCCAAACTGCTGGCACA	0	0	0	0	0	0	0	0	0.000642266	0	6
636	AAAATACAGCGTTTCTGCACTAGTCCCCAGTCGACCGCTGGCACA	0	0	0	0	0	0	0	0	0.000597972	0	6
637	AAAATACAGCGTTTCTGCACTAGTCCCCAGTCGAGCACTGCAGGTGCAGCACAAGGTTCTGCCCTGGCTCATGTTGGCACA	0	0	0	0	0	0	0	0	0.000963399	0	6
640	AAAATACAGCGTTTCTGCACTAGTCCCCCAGTCCCCACTGCA	0	0	0	0	0	0	0	0	7.75149e-05	0	6
643	AAAATACAGCGTTTCTGCACTAGTCCCCCCAGTCCCGGCACA	0	0	0	0	0	0	0	0	0.00743036	0	6
644	AAAATACAGCGTTTCTGCACTAGTCCCCCCAGTCCCTATGGAACTACA	0	0	0	0	0	0	0	0	7.75149e-05	0	6
646	AAAATACAGCGTTTCTGCACTAGTCCCCCCAGTGGCACTGCA	0	0	0	0	0	0	0	0	8.85884e-05	0	6
647	AAAATACAGCGTTTCTGCACTAGTCCCCGCACTGCGGGTGCA	0	0	0	0	0	0	0	0	0.0032224	0	6
648	AAAATACAGCGTTTCTGCACTAGTCCCCGGTCGAGCACTGCA	0	0	0	0	0	0	0	0	0.0043962	0	6
679	AAAATACAGCGTTTCTGCACTATCTGGGGCATCACCGCTGGCACA	0	0	0	0	0	0	0	0	0.251746	0	6
690	AAAATACAGCGTTTCTGCACTATTTCCCTGCCTGCA	0	0	0	0	0	0	0	0	5.53678e-05	0	6
691	AAAATACAGCGTTTCTGCACTATTTCCCTGTCCTTGGCTGCCGGCACA	0	0	0	0	0	0	0	0	0.00275732	0	6
709	AAAATACAGCGTTTCTGCACTCCCCCCCGGATCCGCACTGCA	0	0	0	0	0	0	0	0	0.00170533	0	6
714	AAAATACAGCGTTTCTGCACTCCCCCTGAGGCTGCTGGCACA	0	0	0	0	0	0	0	0	0.00099662	0	6
717	AAAATACAGCGTTTCTGCACTCCCCTGCCCCGGTGCACTGCA	0	0	0	0	0	0	0	0	0.0026798	0	6
732	AAAATACAGCGTTTCTGCACTCTCACTGCTGGCACTGCA	0	0	0	0	0	0	0	0	0.000121809	0	6
733	AAAATACAGCGTTTCTGCACTCTGTCCCAGATCACTGCTGGCACA	0	0	0	0	0	0	0	0	0.00109628	0	6
742	AAAATACAGCGTTTCTGCACTGCCCTGTCCGTTGCTGCTGGCACA	0	0	0	0	0	0	0	0	0.000597972	0	6
745	AAAATACAGCGTTTCTGCACTGGCAGTCCCGGTACTGCA	0	0	0	0	0	0	0	0	0.0520014	0	6
746	AAAATACAGCGTTTCTGCACTGGCAGTCCCGGTACTGCAGGTGCAGTACAAGGTTCTGCCCTGGCTCATGTTGGCACA	0	0	0	0	0	0	0	0	0.00294557	0	6
749	AAAATACAGCGTTTCTGCACTGGTCCCAGTCTGACTGCTGGCACA	0	0	0	0	0	0	0	0	0.000232545	0	6
764	AAAATACAGCGTTTCTGCACTGTCTTGGCTGCTAACACA	0	0	0	0	0	0	0	0	0.000199324	0	6
782	AAAATACAGCGTTTCTGCACTTTGACTATCTCGGCTGCTGGCGCA	0	0	0	0	0	0	0	0	0.000121809	0	6
807	AAAATACAGCGTTTCTGCATCCCCCCGACTGCCGGCACA	0	0	0	0	0	0	0	0	0.000952326	0	6
811	AAAATACAGCGTTTCTGCATCGCCCCCCCAGTGTTGGCTGCTGGCACA	0	0	0	0	0	0	0	0	0.000199324	0	6
818	AAAATACAGCGTTTCTGCATTACTGACACTGCTGGCACA	0	0	0	0	0	0	0	0	5.53678e-05	0	6
832	AAAATACAGCGTTTCTGCCCAATCACCGTTGGCACA	0	0	0	0	0	0	0	0	0.00031006	0	6
841	AAAATACAGCGTTTCTGCCCCCTGCCCACTGCTGGCACA	0	0	0	0	0	0	0	0	0.0375726	0	6
845	AAAATACAGCGTTTCTGCCCCCTGTACTTGGCTGCTGGCACA	0	0	0	0	0	0	0	0	0.15225	0	6
865	AAAATACAGCGTTTCTGCCTCCCCTGTCCCACTGCA	0	0	0	0	0	0	0	0	0.10676	0	6
868	AAAATACAGCGTTTCTGCGCCCCAGTCTGCACTGCGGGTGCA	0	0	0	0	0	0	0	0	0.00665521	0	6
869	AAAATACAGCGTTTCTGCGCCCCAGTCTGCACTGTCCCCGCTGGCACA	0	0	0	0	0	0	0	0	0.000166103	0	6
883	AAAATACAGCGTTTCTGCGCTAGATCCCCAGTCCGAATCACTGCTGGCACA	0	0	0	0	0	0	0	0	0.000476163	0	6
891	AAAATACAGCGTTTCTGCGTCCCCCCCAGCCTTGCA	0	0	0	0	0	0	0	0	0.00416366	0	6
892	AAAATACAGCGTTTCTGCGTCCCCCCCAGTCTTGCAGGTGCAGTACAAGGTTCTGCCCTGGCTCATGTTGGCCACTTGCAGCCTCAGCTCCGTATCACCGCTGGCACA	0	0	0	0	0	0	0	0	0.000210398	0	6
898	AAAATACAGCGTTTCTGCTCCCTGTCCCGGATGGCTGCTGGCACA	0	0	0	0	0	0	0	0	0.000465089	0	6
900	AAAATACAGCGTTTCTGCTCCGGCCCCCCCGGATTCTGCACTGCA	0	0	0	0	0	0	0	0	6.64413e-05	0	6
902	AAAATACAGCGTTTCTGCTCGCCTCCCCTGCCTGCA	0	0	0	0	0	0	0	0	0.102829	0	6
903	AAAATACAGCGTTTCTGCTCGCCTCCCCTGCCTGCAGGTGCAGTACAAGGTTCTGCCCTGGCTCATGTTGGCCACTTGCAGCCTCAGCTCCGTATCAGTGGCCAACATGAGCCAGGGCAGAACCTTGTACTGCACCTGCAGGCAGGGGAGGCGAGCAGAAACGCTGGCACA	0	0	0	0	0	0	0	0	9.9662e-05	0	6
907	AAAATACAGCGTTTCTGCTCTGACGTCACTGCTGGCACA	0	0	0	0	0	0	0	0	0.000631193	0	6
916	AAAATACAGCGTTTCTGCTTTCCCCCAGTCCCGAGAGCTGGCACA	0	0	0	0	0	0	0	0	0.0157687	0	6
927	AAAATACAGCGTTTCTGTACTAGACCTGTATCTGCTGGCACA	0	0	0	0	0	0	0	0	0.00018825	0	6
935	AAAATACAGCGTTTCTGTCCCTGCGTCTGCACTGCA	0	0	0	0	0	0	0	0	0.0643484	0	6
936	AAAATACAGCGTTTCTGTCCCTGCGTCTGCACTGCAGGTGCAGTACAAGGTTCTGCCCTGGCTCATGTTGGCACA	0	0	0	0	0	0	0	0	0.00220364	0	6
943	AAAATACAGCGTTTCTGTTCCCCAGTCCCGGTGACTGCTGGCACA	0	0	0	0	0	0	0	0	0.000376501	0	6
952	AAAATACAGCGTTTGTTGCCCCCCGGTCGGAGCTTGGCTGCTGGCACA	0	0	0	0	0	0	0	0	0.000730855	0	6
961	AAAATACAGTGTTTCAGTCTCTTGGCTGCTGGCACA	0	0	0	0	0	0	0	0	0.000741928	0	6
982	AAAATACGGCGTTTCTGCACCCCCCCAGTCTTGGCTGCTGGCACA	0	0	0	0	0	0	0	0	0.00249155	0	6
1001	AAAATACTGCGTTTCTGCACTAGACCCAGCGGCACTGCAGGTGCAGTACAAGGTTCTGCCCTGGCTCATGTTGGCACA	0	0	0	0	0	0	0	0	0.000121809	0	6
1003	AAAATACTGCGTTTCTGCGTCCCCCCCAGTCTTGCAGGTGCAGTACAAGGTTCTGCCCTGGCTGCTGGCACA	0	0	0	0	0	0	0	0	9.9662e-05	0	6
1009	AAAATAGAGCGTACTTCCAGAATTCCCTCCACTGCTGGCACA	0	0	0	0	0	0	0	0	0.000298986	0	6
1014	AAAATAGAGCGTATCTCCAACCCTGGCTGCACTGCA	0	0	0	0	0	0	0	0	0.00223686	0	6
1018	AAAATAGAGCGTATTCCCAGAACCCCCGGGGGCACTGCA	0	0	0	0	0	0	0	0	0.00115165	0	6
1019	AAAATAGAGCGTATTCCCAGAATTGTCCCGACTGCTGGCACA	0	0	0	0	0	0	0	0	0.00124024	0	6
1030	AAAATAGAGCGTATTTCCAACTCTGGCTGCACTGCA	0	0	0	0	0	0	0	0	7.75149e-05	0	6
1034	AAAATAGAGCGTATTTCCACCCCCCGTCCCACTGCA	0	0	0	0	0	0	0	0	0.00146171	0	6
1036	AAAATAGAGCGTATTTCCACCCCCTGTCCCACTGCAGGTGCAGTACAAGGTTCTGCCCTGGCTCGTGTTGGCACA	0	0	0	0	0	0	0	0	0.00015503	0	6
1044	AAAATAGAGCGTATTTCCAGAAAACCCCGTCCCGGGGCTGCTGGCACA	0	0	0	0	0	0	0	0	0.000509384	0	6
1047	AAAATAGAGCGTATTTCCAGAAACCCACCTCTTGCTGGCACA	0	0	0	0	0	0	0	0	0.000298986	0	6
1054	AAAATAGAGCGTATTTCCAGAAAGGCGATCTTGGCTGCTGGCACA	0	0	0	0	0	0	0	0	0.102585	0	6
1062	AAAATAGAGCGTATTTCCAGAACCCCCGGGGGCACTGCAGGTGCAGTACAAGGTTCTGCCCTGGCTCATGTTGGCCACTTGCAGCCTCAGCTCCGTATCAGTGCCCCCGGGGGTTCTGGAAATACA	0	0	0	0	0	0	0	0	7.75149e-05	0	6
1067	AAAATAGAGCGTATTTCCAGAACCCCTGTCCCGGCTGCTGGCACA	0	0	0	0	0	0	0	0	0.0464757	0	6
1075	AAAATAGAGCGTATTTCCAGAACCTGCTGCACTGCA	0	0	0	0	0	0	0	0	0.357753	0	6
1076	AAAATAGAGCGTATTTCCAGAACCTTCATCACTGCTGGCACA	0	0	0	0	0	0	0	0	0.0229444	0	6
1078	AAAATAGAGCGTATTTCCAGAACGGCTAGCACCACA	0	0	0	0	0	0	0	0	7.75149e-05	0	6
1082	AAAATAGAGCGTATTTCCAGAACTGCCACCACTGGCACA	0	0	0	0	0	0	0	0	0.000276839	0	6
1088	AAAATAGAGCGTATTTCCAGAACTGTCTGCACTGCAGGTGCAGTACAAGGTTCTGCCCTGGCTCATGTTGGCACA	0	0	0	0	0	0	0	0	0.00734177	0	6
1092	AAAATAGAGCGTATTTCCAGAAGAAGAGAAACTGCTGGCACA	0	0	0	0	0	0	0	0	0.000620119	0	6
1106	AAAATAGAGCGTATTTCCAGAAGTGCCTCTAGAACTACA	0	0	0	0	0	0	0	0	0.059919	0	6
1107	AAAATAGAGCGTATTTCCAGAAGTGGGCTGTCTGCCGGCACA	0	0	0	0	0	0	0	0	0.0263772	0	6
1117	AAAATAGAGCGTATTTCCAGAATCAGCATCTGCACTACA	0	0	0	0	0	0	0	0	0.00198217	0	6
1119	AAAATAGAGCGTATTTCCAGAATCCCCCTGTCCCCCATCACCGCA	0	0	0	0	0	0	0	0	0.000409722	0	6
1124	AAAATAGAGCGTATTTCCAGAATCCCGGTCACTGCA	0	0	0	0	0	0	0	0	0.036288	0	6
1134	AAAATAGAGCGTATTTCCAGAATCTGTAAGGCTGCTGGCACA	0	0	0	0	0	0	0	0	0.0935273	0	6
1138	AAAATAGAGCGTATTTCCAGAATGACCCTGACCGCTGGCACA	0	0	0	0	0	0	0	0	0.120181	0	6
1143	AAAATAGAGCGTATTTCCAGAATGTTCCGCACTGCA	0	0	0	0	0	0	0	0	0.00302308	0	6
1144	AAAATAGAGCGTATTTCCAGAATGTTCTGCACTGCAGGTGCAGTACAAGGTTCTGCCCCTAGAACTACA	0	0	0	0	0	0	0	0	0.000121809	0	6
1148	AAAATAGAGCGTATTTCCAGAATTCCCCTGATCTGCACTGCAGGTGCAGTACAAGGTTCTGCTGGCACA	0	0	0	0	0	0	0	0	0.00080837	0	6
1150	AAAATAGAGCGTATTTCCAGAATTCCCTTCACTGCTGGCACA	0	0	0	0	0	0	0	0	0.000896958	0	6
1166	AAAATAGAGCGTATTTCCAGAATTGTCCCGCCTGCTGCCACA	0	0	0	0	0	0	0	0	5.53678e-05	0	6
1174	AAAATAGAGCGTATTTCCAGAATTTCCTGTGAGGCTGCTGGCACA	0	0	0	0	0	0	0	0	0.00210398	0	6
1181	AAAATAGAGCGTATTTCCAGACCCCCATGCTTGGTTGCTGGCACA	0	0	0	0	0	0	0	0	0.000664413	0	6
1185	AAAATAGAGCGTATTTCCAGACCCCCTGTCTTCTTGGCTGCTGGCACA	0	0	0	0	0	0	0	0	0.000376501	0	6
1194	AAAATAGAGCGTATTTCCAGAGCTGCCACCGCTGGCACA	0	0	0	0	0	0	0	0	0.00101877	0	6
1197	AAAATAGAGCGTATTTCCAGAGTTGGCGCTGCA	0	0	0	0	0	0	0	0	7.75149e-05	0	6
1206	AAAATAGAGCGTATTTCCAGCCCCCGATTCTTGGCTGCTGGCACA	0	0	0	0	0	0	0	0	0.00410829	0	6
1214	AAAATAGAGCGTATTTCCAGCCCCCTGTCCCGTACTGCGGGTGCA	0	0	0	0	0	0	0	0	0.00294557	0	6
1219	AAAATAGAGCGTATTTCCAGCCCCCTGTGCACTGCA	0	0	0	0	0	0	0	0	0.0922649	0	6
1225	AAAATAGAGCGTATTTCCAGCCCTCACATCACTGCTGGCACA	0	0	0	0	0	0	0	0	0.00681024	0	6
1230	AAAATAGAGCGTATTTCCAGCCGTGTTATCAGCACTGCAGGTGCAGTACAAGGTTCTGCCCTGACCGCTGGCACA	0	0	0	0	0	0	0	0	0.000132883	0	6
1231	AAAATAGAGCGTATTTCCAGCCGTGTTATCTGCACTGCA	0	0	0	8.73655e-05	9.44936e-05	0	0	0	1.20576	0	6
1232	AAAATAGAGCGTATTTCCAGCCGTGTTATCTGCACTGCAGGTGCAGTACAAGGTTCTGCCCTGGCTCATGTTGGCCACTTGCAGCCTCAGCTCCGTCTCAGTGACCCCCCTGGTGCTGGCACA	0	0	0	0	0	0	0	0	0.000298986	0	6
1243	AAAATAGAGCGTATTTCCAGGATCTGTCAGGGCACTGCA	0	0	0	0	0	0	0	0	0.00156137	0	6
1244	AAAATAGAGCGTATTTCCAGGATGTTCTGCACTGCA	0	0	0	0	0	0	0	0	0.000298986	0	6
1246	AAAATAGAGCGTATTTCCAGGCCCCCTGTCCCTAGAACTACA	0	0	0	0	0	0	0	0	0.128176	0	6
1247	AAAATAGAGCGTATTTCCAGGCCCCCTGTTTTGGCTGCTGGCACA	0	0	0	0	0	0	0	0	0.0490005	0	6
1249	AAAATAGAGCGTATTTCCAGGGCTGTCCCCTCCTTGGCTGCTGGCACA	0	0	0	0	0	0	0	0	0.0819886	0	6
1255	AAAATAGAGCGTATTTCCAGTCCCTGTCCCATCTGCACTGCAGGTGCAGTACAAGGTTCTGCCACCGCTGGCACA	0	0	0	0	0	0	0	0	0.00015503	0	6
1256	AAAATAGAGCGTATTTCCAGTCCGGCGCCCCCCTCCACTGCTGGCACA	0	0	0	0	0	0	0	0	0.0299761	0	6
[truncated: 20,115 more rows]
