# Supplementary material for: Gut Microbiome Contributes to Liver Fibrosis Impact on T Cell Receptor Immune Repertoire
Source: Front Microbiol. 2020 Nov 27;11:571847. doi: 10.3389/fmicb.2020.571847 (PMC7729130; doi:10.3389/fmicb.2020.571847)
Supplement: Supplementary file 13 [file Table_13.XLSX]

## Sheet: Cell clusters
Cluster	1	2	3	4	5	6	7	8	9	10	11	12	13	14	15	16	17	18	19	20
CD69	1.83924	0.00249352	3.69824	3.53824	3.79058	3.9927	3.26842	4.39259	1.86644	3.08831	3.9677	0.00252781	0.163089	3.45701	4.09037	3.46147	4.07119	4.63682	3.67549	4.50146
CD45	4.10769	4.01641	4.34922	4.29517	4.54559	4.65741	3.9378	5.31127	2.67239	4.12714	4.70819	3.8848	3.57943	4.07961	4.00175	5.03657	4.34917	5.21724	4.3732	4.99507
CD44	5.45173	5.00942	5.00323	6.43691	5.57787	3.80188	5.03364	4.91546	2.46087	6.16568	2.97079	3.65045	6.17446	5.78389	5.78357	4.65662	3.7933	4.5806	3.94926	6.52027
CD38	3.05476	1.04922	1.96634	1.40729	2.77	1.93896	2.20204	3.71592	1.9059	1.12225	1.92947	3.51156	2.47926	2.0334	2.76687	3.25344	3.74665	3.84466	6.60588	3.67687
B220	1.18285	1.05235	0.835207	0.547016	0.685935	0.819806	1.84874	2.96552	1.4682	0.296884	0.867424	5.23629	5.10109	0.816273	1.67879	0.663963	3.25504	3.26582	3.19369	3.23703
MHC_II	1.41484	0.312987	0.180244	0.912177	1.15544	0.26264	2.03683	4.65929	2.29331	0.30361	0.181437	4.86017	2.65121	4.42939	1.48626	1.04859	4.82544	4.98541	3.7781	4.66358
CD8a	0.00166249	0.000524492	0.419099	0.0783438	0.787201	0.704882	0.64366	4.68453	0.00244655	0.0027019	4.67383	0.00041302	0.104492	0.157166	1.10378	4.71375	0.867373	1.50854	0.438422	0.918241
TCRb	0.0010855	0.000590952	0.00124955	0.000473863	2.22141	3.46008	0.00505719	2.80831	0.001209	0.000447228	2.89416	0.00235742	0.000408532	0.00074005	0.00183034	2.72908	0.00232549	3.37545	0.0913782	0.0233159
CD4	0.000635275	6.74675e-05	0.0019506	0.0031308	3.83136	4.23015	1.24792	0.160823	0.000571135	0.00103351	0.00249977	0.000115196	2.86871	0.00145016	0.668899	0.00136448	0.00403242	4.17334	0.0029292	0.420332
TCRgd	0.00138052	1.36394	0.000520297	0.00175278	0.112253	0.000479104	1.64299	0.00113768	0.00168431	0.00076158	0.000451722	0.000663294	0.000661341	0.00093686	0.00126815	0.000754895	0.0004065	0.00102479	0.000666097	0.00743633
GITR	2.28438	1.03671	1.07374	0.38068	4.01847	0.988411	2.36666	1.39965	0.00103267	0.00212966	0.70855	0.000977784	0.00154099	0.102326	0.3647	1.34788	0.0989392	1.36814	0.238049	0.837359
CD127	0.236087	0.00446537	0.0695858	0.203842	1.11402	0.788469	3.03157	0.799004	0.00136343	0.00431809	0.765889	0.000359236	0.000734575	0.0542686	0.376817	0.00446715	0.0899532	1.16267	0.213188	0.700613
CD11c	2.49082	0.057555	0.986795	0.44062	0.187682	0.0022935	3.23375	0.462605	0.00216154	0.220132	0.00203953	0.000635879	1.41214	1.75703	0.889509	0.00459227	0.00259929	0.324945	4.55341	0.80253
CTLA_4	0.00122723	0.000863848	0.00100722	3.13853	0.610773	0.00248079	2.07119	0.0194977	0.000863641	0.00195795	0.00117994	0.000775758	0.00231988	0.00203924	0.00171166	0.00140445	0.000978823	0.155669	0.162853	3.25375
Foxp3	0.00362036	0.00250778	0.0296828	3.46305	3.39318	0.00227351	2.19784	0.272756	0.00129318	0.00228431	0.011454	0.00144841	0.00146427	0.0483555	0.00296194	0.00225618	0.00305316	0.287785	0.442407	3.5824
SLAM	0.00094656	0.00064748	0.00114149	0.00274229	1.75169	0.502105	0.435846	1.6075	0.00104665	0.00112481	0.697895	0.535491	0.000473421	0.00264507	0.0353618	2.05511	0.890919	1.37123	0.5207	0.865824
CD86	0.250509	0.00332274	0.00131556	0.00206601	0.480155	0.053547	0.268312	1.83489	0.00265	0.00562468	0.99535	0.00246814	0.00180118	0.343033	0.00224191	2.50583	0.00220925	0.397584	0.00245693	0.207478
CD3e	0.00118061	0.0514822	0.000895355	0.00273771	1.28762	2.06776	1.76491	1.27975	0.00167971	0.000741011	1.3094	0.000830688	0.0019443	0.000997675	0.00593075	0.933075	0.000862594	2.09795	0.323291	0.246935
CD25	0.000610095	0.000300037	0.000687399	0.10104	0.366477	0.00110947	2.42784	0.00144415	0.000503692	0.0015988	0.000485472	0.000236467	0.000371338	0.00106373	0.000912802	0.000450824	0.000703801	0.00247862	0.00150096	0.343234
CD160	0.796706	0.210612	0.00120937	0.00383686	0.0021262	0.00318817	1.43919	0.0865256	0.00167567	0.00102402	0.00083929	0.289055	0.126559	0.00118497	0.00139911	0.00237594	0.000800029	0.146998	0.00198508	0.230898
LAG3	0.040766	0.000260596	0.000208399	0.000855504	0.000959454	0.000209206	0.0572383	0.00390162	0.000376989	0.000168227	0.000329445	0.00220075	0.547032	0.000481782	0.00134395	0.664803	0.000364944	0.000625209	0.00139911	0.00185214
TIM3	0.237261	0.00316584	0.345464	0.109042	0.00182384	0.00133554	1.84295	0.618573	0.000656082	0.00121197	0.00162057	0.000335413	0.000252156	0.00339491	0.00140205	1.63166	0.00124826	0.0661551	0.00152215	0.346727
cKIT	0.0964314	0.00033064	0.000241958	0.000240692	0.000244434	0.000187228	0.00145	0.00112916	0.000264173	0.000156194	0.000448549	0.000315842	7.77094e-05	0.00123392	0.000401681	0.00138269	0.00018646	0.000377302	0.000536812	0.000571144
ICOS	0.00047089	0.000259177	0.000429399	0.000636493	0.26575	0.000862935	0.625126	0.00140879	0.000270903	0.0003587	0.000688786	0.000174701	0.000122211	0.000291018	0.000675208	0.000704935	0.000434679	0.00207181	6.52381	0.00146555
NK1.1	1.63294	0.169872	1.4463	0.000283537	0.000260696	0.000353387	0.123407	0.00219534	0.000199916	0.000103793	0.00128161	0.000161426	0.000103822	0.000154882	0.000255055	0.00130301	0.000204242	0.000605944	0.00050532	0.00101405
KLRG1	0.989719	1.42468	0.609202	0.416836	2.04529	0.311529	0.73013	1.14496	1.09211	0.447514	0.31839	1.22122	1.13492	0.669018	0.242757	0.55723	0.302175	1.06678	0.194807	0.989294
CD14	0.0501766	0.00305726	0.00235712	0.567945	0.0736323	0.00134472	1.98465	0.119065	0.00196432	1.17593	0.00130328	0.00106532	0.50002	1.10172	0.222669	0.00153824	0.00149924	0.0606598	2.13074	0.731348
TGFb	0.00204977	0.00138854	0.00285746	0.526717	0.0119215	0.000950064	2.19357	0.118759	0.696617	0.661636	0.000942502	0.00117385	0.0468419	0.692487	0.086569	0.00165796	0.00134058	0.00764394	0.00286893	0.737156
CD80	0.266369	0.0292896	0.0349997	0.927337	0.54451	0.00117381	0.793737	0.138075	0.00256707	0.84218	0.000875833	0.00131422	0.551108	0.903483	0.316097	0.0819254	0.00113311	0.00377836	0.00216586	1.03498
Tbet	4.03655	3.30884	3.97589	3.40787	1.31441	1.17353	2.03396	3.036	0.326371	0.666279	1.54107	0.356234	0.712531	1.35555	1.46447	3.279	1.04964	1.9069	0.930144	3.65663
Gr_1	0.00249182	0.000779784	0.333302	0.757703	0.742142	0.477408	3.24754	1.22699	0.00220264	0.681405	0.483039	0.000743655	0.00097535	0.348869	0.567805	0.577576	0.540538	1.2021	0.839648	1.38019
CD11b	0.53668	0.291427	2.40909	4.21047	1.64321	1.78136	3.10077	2.08754	0.489489	3.95932	1.36706	0.00211788	0.412106	3.28544	1.68738	0.993449	1.50137	2.32704	1.43393	4.26384
BTLA	0.294964	0.164914	0.333221	3.30474	0.595622	0.896228	1.38841	2.14704	0.271029	0.297793	1.01661	1.90189	0.364554	0.839175	0.747548	0.844328	2.10905	2.32939	1.58953	3.58861
Bcl_6	0.424422	0.0299269	0.444279	2.52837	0.461802	0.539506	1.73124	1.32016	0.00270567	0.490534	0.451506	0.368711	0.0568192	0.796087	0.685185	0.492235	0.873062	1.33716	0.454632	2.79619
PD_L1	1.48795	0.638866	0.559577	0.206609	0.655332	0.744695	1.69293	1.72007	0.37902	0.198693	0.896748	1.3374	0.36639	0.443143	0.539106	0.811986	1.1055	1.75779	6.77038	1.52339
PD_1	0.00162729	0.000105334	0.862317	0.488504	1.66889	1.20713	1.22676	2.13689	0.00156892	0.13931	1.24367	0.000101457	0.00016363	0.365399	1.13049	2.0315	1.28975	1.91273	6.5257	1.55393
CD62L	0.0676601	3.30953	3.30659	0.547453	0.477185	1.99244	2.20093	2.95504	0.325719	1.00472	3.03819	1.94555	0.144821	0.440076	0.964517	0.242129	2.6328	3.08763	1.98664	2.73089
F4_80	0.383263	0.000656248	1.66095	2.0071	1.55628	1.96618	3.11554	2.16309	0.373389	1.39424	1.91533	0.000954033	0.00160053	1.70649	2.14198	1.13694	2.07782	2.54589	1.46493	2.75715

## Sheet: Cell types
Cell type	B cell	CD4 T	CD8 T	DC	Mac	Neu	NK	NKT	Tgd
CD69	3.03919	3.97533	3.8387	3.67486	4.07383	3.40697	3.16614	3.73752	0.140614
CD45	4.13543	4.64116	4.87891	4.37313	4.39452	4.18581	4.20225	4.14581	4.27531
CD44	3.73383	3.90121	4.20628	3.94659	5.7207	6.25002	5.08427	5.7398	5.11136
CD38	3.61647	2.01805	2.49354	6.60674	2.55931	1.37862	2.0623	2.32668	1.30403
B220	3.5545	0.818255	0.934434	3.19634	1.19089	0.500531	0.99054	1.91551	0.861566
MHC_II	4.7637	0.331976	0.733899	3.77695	3.95764	0.622606	0.454393	1.52325	0.440344
CD8a	0.190038	0.707394	4.65961	0.437869	0.579812	0.0293502	0.0354442	1.81408	0.00144962
TCRb	0.00219428	3.3495	2.86121	0.0904215	0.00136694	0.000580977	0.00100166	0.632856	0.000858972
CD4	0.00121615	4.19054	0.00283832	0.00293825	0.0783105	0.0015935	0.000973541	1.71133	0.000312245
TCRgd	0.000538579	0.000635875	0.000608121	0.00066095	0.00149509	0.00098031	0.000788564	2.15653	2.95938
GITR	0.00245298	1.08363	0.992765	0.232271	0.647237	0.0856357	1.33456	1.18456	1.12563
CD127	0.00172062	0.818477	0.510386	0.21332	0.42086	0.0872983	0.037268	1.66509	0.386025
CD11c	0.00157548	0.0025994	0.00421423	4.55396	1.77929	0.368354	1.31212	1.62643	0.00122009
CTLA_4	0.000899894	0.00328963	0.0015562	0.164906	0.00323026	0.209509	0.000980121	2.61693	0.00129681
Foxp3	0.00206948	0.00414896	0.016725	0.441105	0.143726	0.235053	0.00497412	3.16015	0.0022319
SLAM	0.672736	0.578621	1.12263	0.528768	0.0209183	0.00176586	0.000850744	0.645795	0.00149662
CD86	0.0022989	0.0771535	1.51953	0.00243395	0.291309	0.00345237	0.00195958	1.52306	0.390156
CD3e	0.000888718	1.97685	1.20556	0.323598	0.00215708	0.00128435	0.000894409	1.28586	0.780832
CD25	0.000496469	0.00135269	0.000618048	0.00150297	0.00186511	0.00219937	0.00058175	2.26582	0.000405855
CD160	0.00230341	0.00295684	0.00160212	0.00197089	0.00204781	0.00153516	0.00493137	1.8713	0.331966
LAG3	0.000859866	0.000269398	0.00151075	0.00139283	0.000550788	0.000493051	0.000659923	1.93873	0.000448046
TIM3	0.00078605	0.00137711	0.193657	0.00151548	0.11531	0.00208372	0.253854	2.23064	0.00238269
cKIT	0.000237832	0.000189937	0.000756462	0.000567457	0.000898465	0.000254753	0.00074868	0.119403	0.00031113
ICOS	0.000321831	0.00110044	0.000806148	6.52394	0.000552516	0.000456097	0.000381062	0.657249	0.000485609
NK1.1	0.000188579	0.000348202	0.00130921	0.000504747	0.000785648	0.000166523	1.4878	0.991825	0.000706098
KLRG1	0.6691	0.354179	0.493285	0.193231	0.598255	0.466563	0.891758	0.47549	1.20022
CD14	0.00140087	0.00151432	0.00175272	2.13068	0.747231	0.830015	0.00282662	1.97693	0.0109086
TGFb	0.00145132	0.00108803	0.00152215	0.00293422	0.54357	0.57254	0.0022792	2.24825	0.00132865
CD80	0.00133481	0.00151713	0.0021348	0.00216464	0.738622	0.842858	0.081363	1.91792	0.0682873
Tbet	0.737944	1.18614	2.58589	0.92511	1.89139	1.35538	3.94182	3.20621	2.77865
Gr_1	0.0849197	0.496598	0.630224	0.838851	1.00657	0.66935	0.0401383	1.33554	0.00142434
CD11b	0.784754	1.77217	1.34558	1.42883	3.15726	4.00072	1.97491	3.875	0.00250243
BTLA	1.96837	0.866495	1.09055	1.5913	0.940984	0.892884	0.264182	3.04474	0.270258
Bcl_6	0.609492	0.528986	0.579528	0.454242	0.818546	1.30222	0.349139	2.24998	0.0819991
PD_L1	1.15846	0.728668	0.97967	6.77044	0.879746	0.261348	0.748987	1.73037	0.974938
PD_1	0.394303	1.24668	1.59733	6.52594	0.989642	0.33071	0.334554	1.69441	0.000531307
CD62L	2.23694	1.74747	1.78899	1.98247	1.27638	0.840747	2.87652	2.16322	1.15358
F4_80	0.85235	1.92967	1.66565	1.45497	2.24614	1.70473	0.955712	2.51078	0.00131295
